# Supplementary figures and images for: Understanding the Effect of Different Glucose Concentrations in the Oligotrophic Bacterium Bacillus subtilis BS-G1 through Transcriptomics Analysis (part 2 of 6)
Source: Preprints.org preprint supplement (doi:10.20944/preprints202308.1891.v1), 2023-08-29

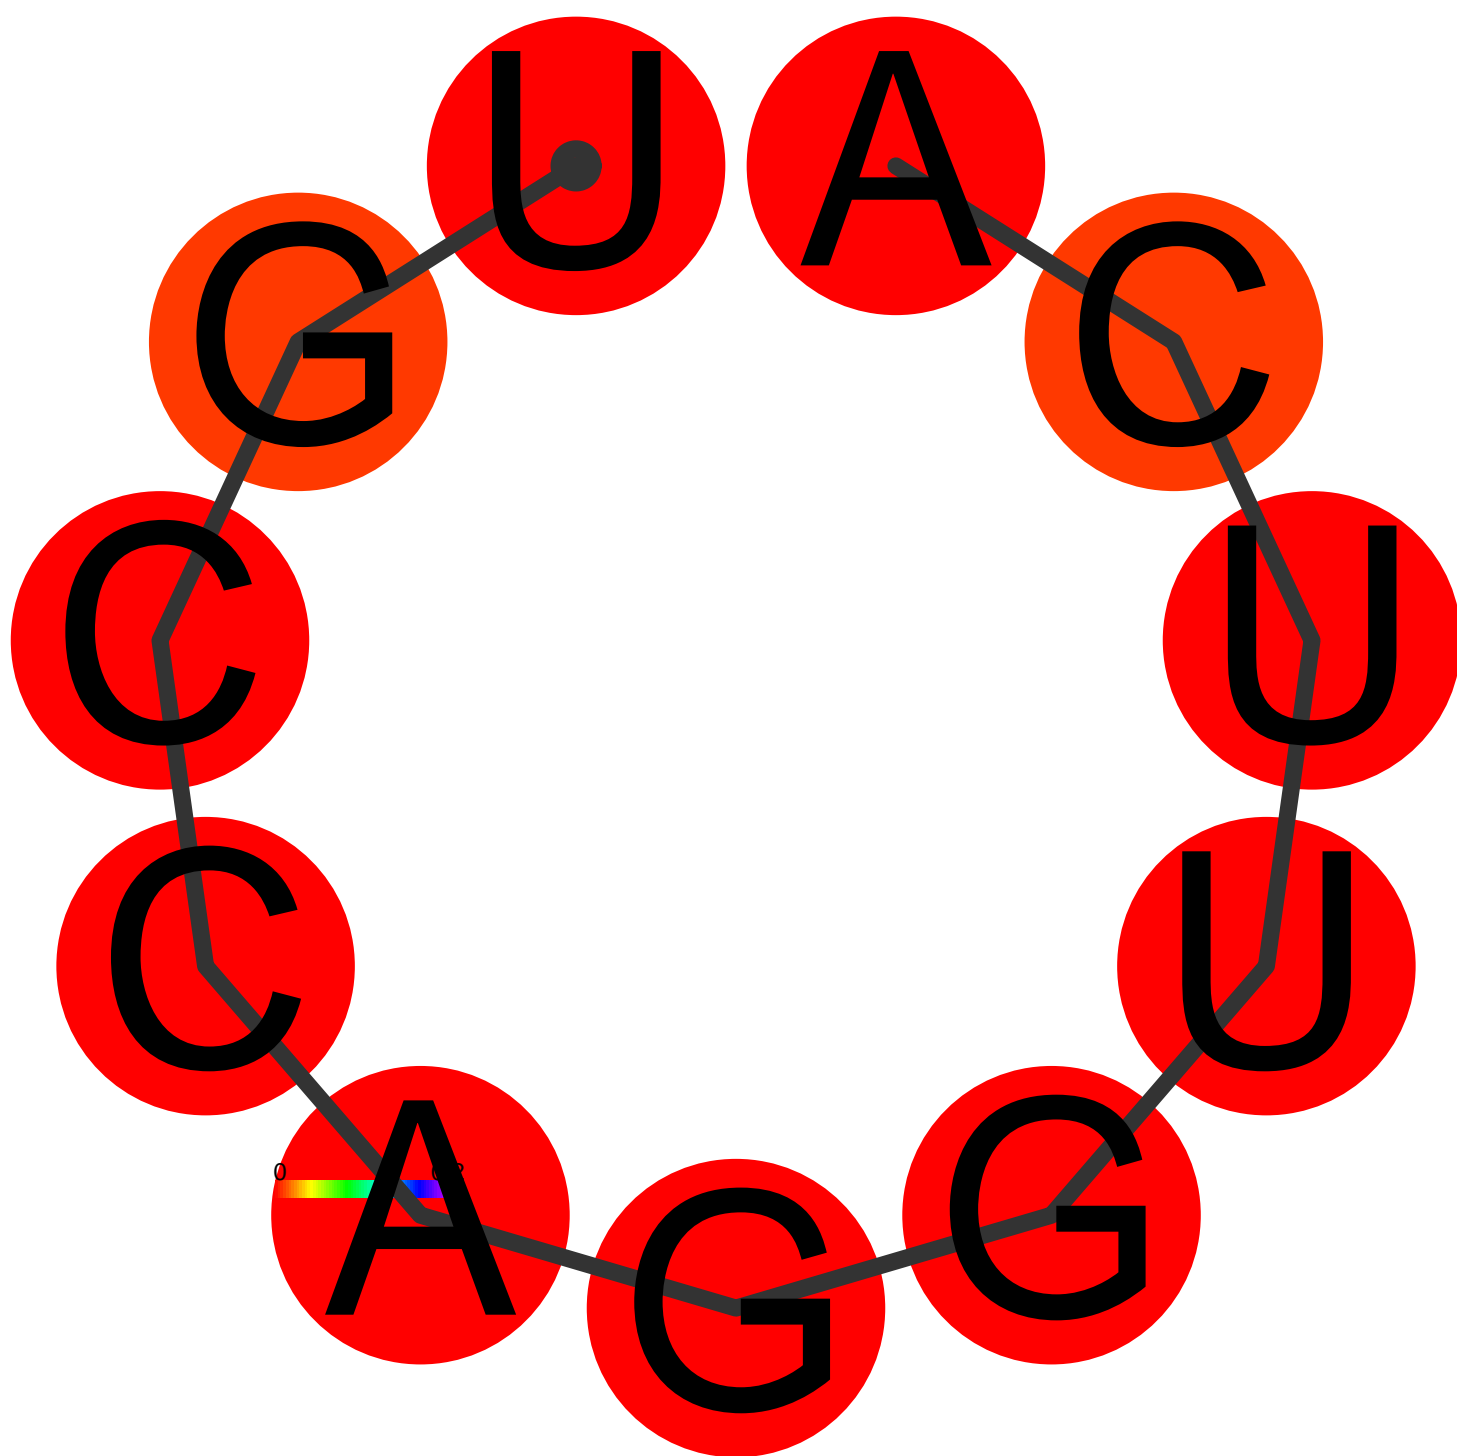

Supplement: Supplementary file 101 [file supplementary]

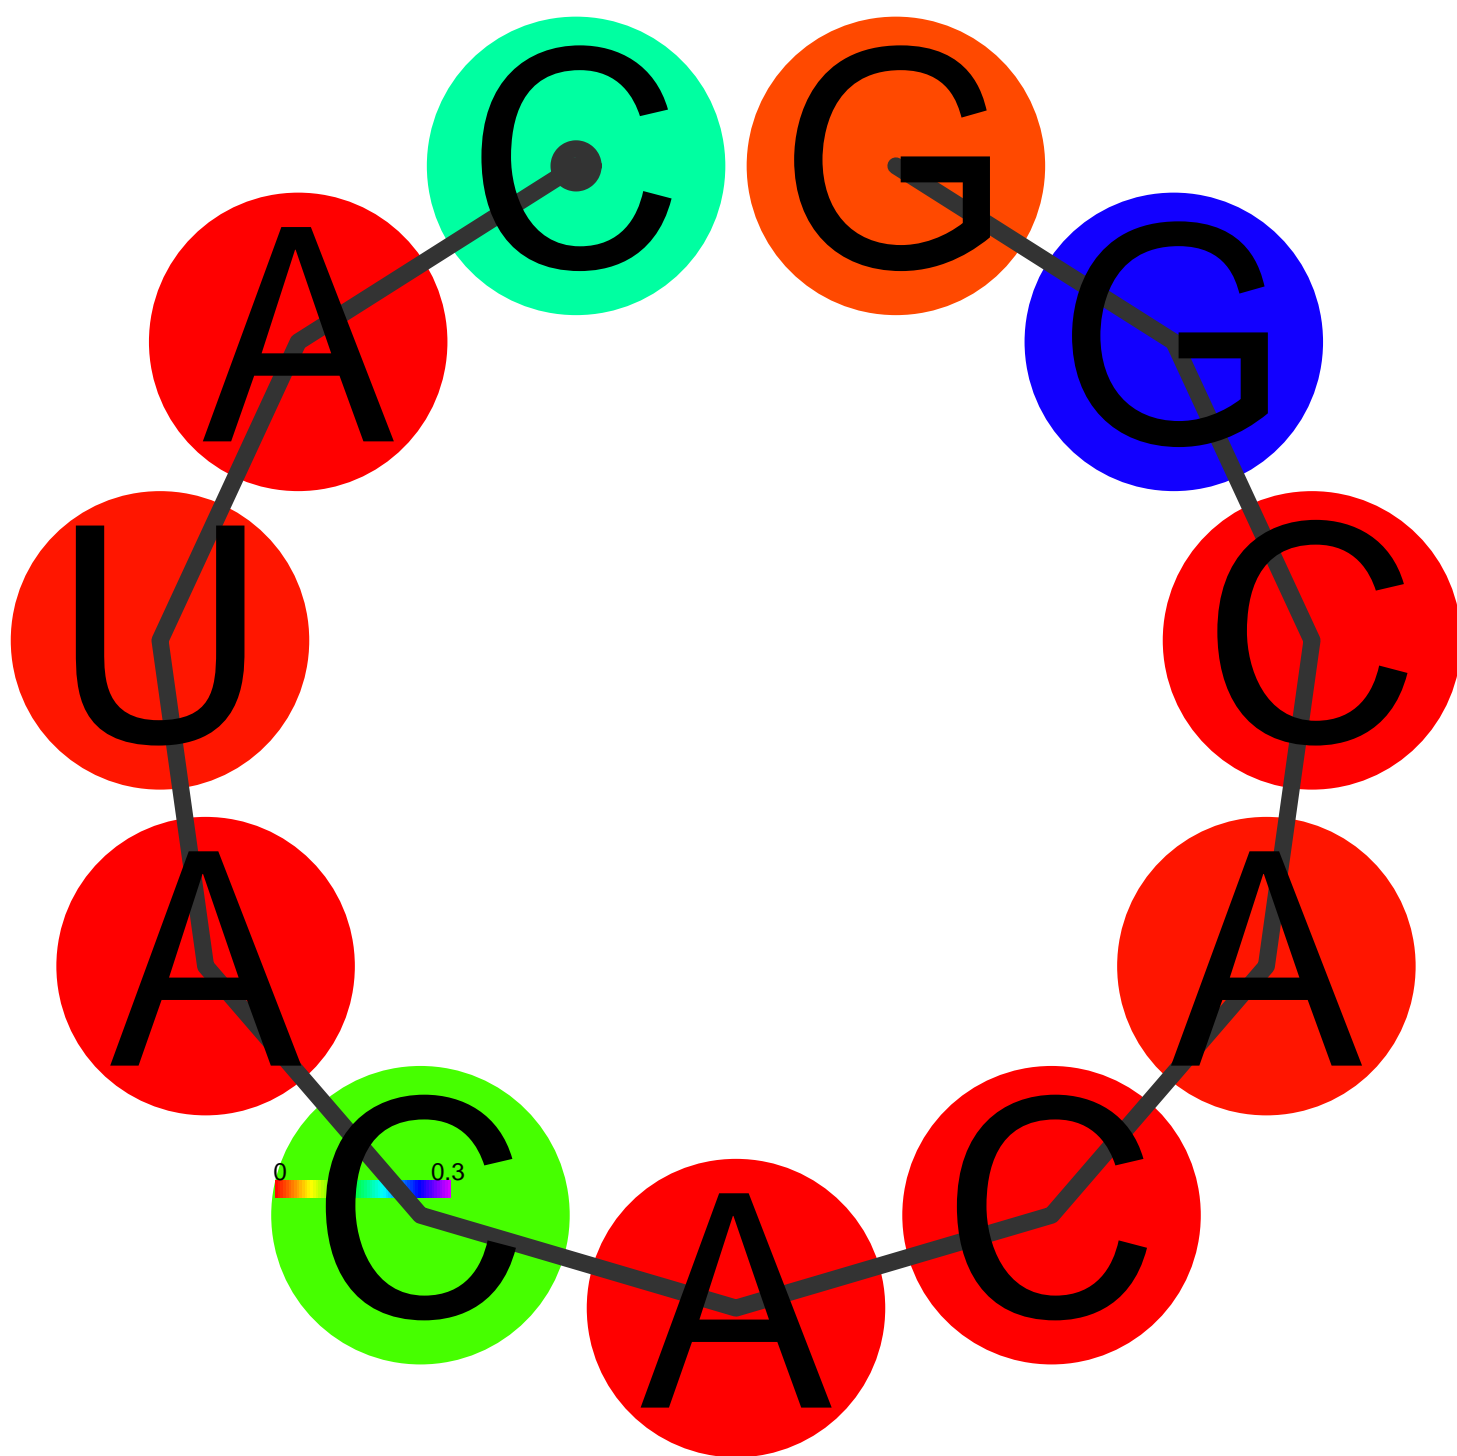

Supplement: Supplementary file 102 [file supplementary]

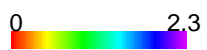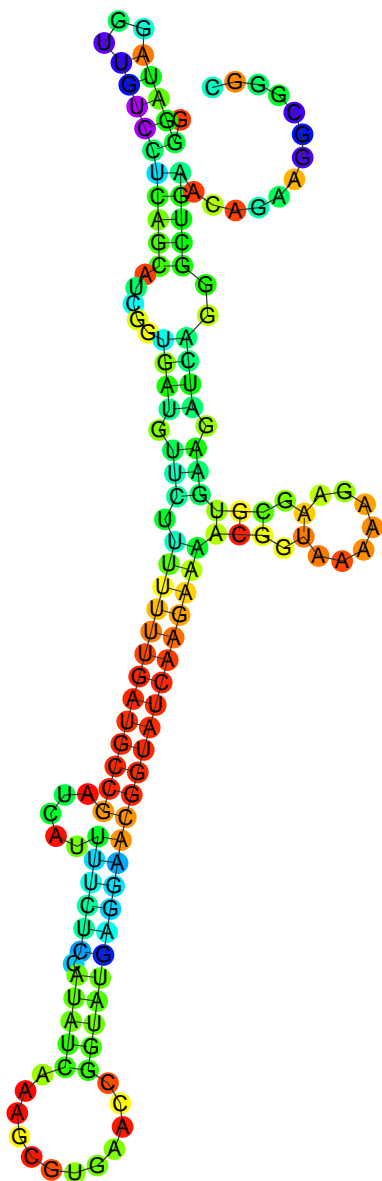

Supplement: Supplementary file 103 [file supplementary]

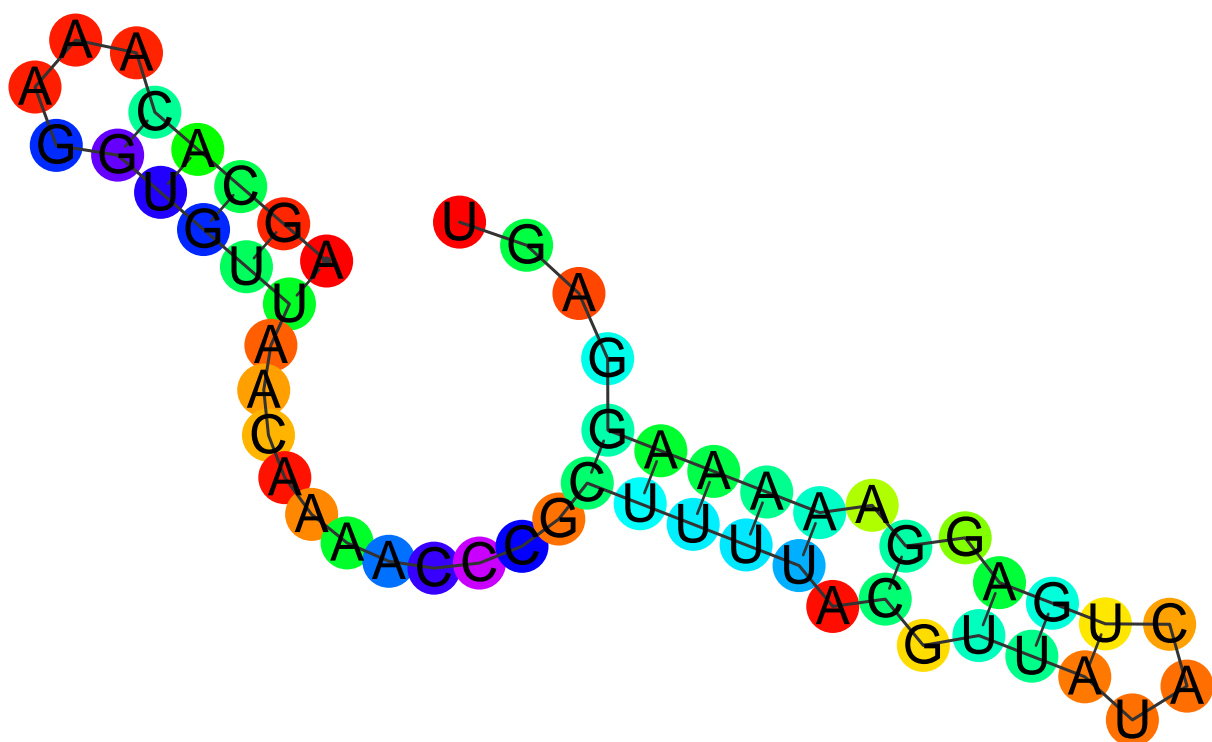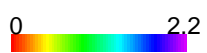

Supplement: Supplementary file 104 [file supplementary]

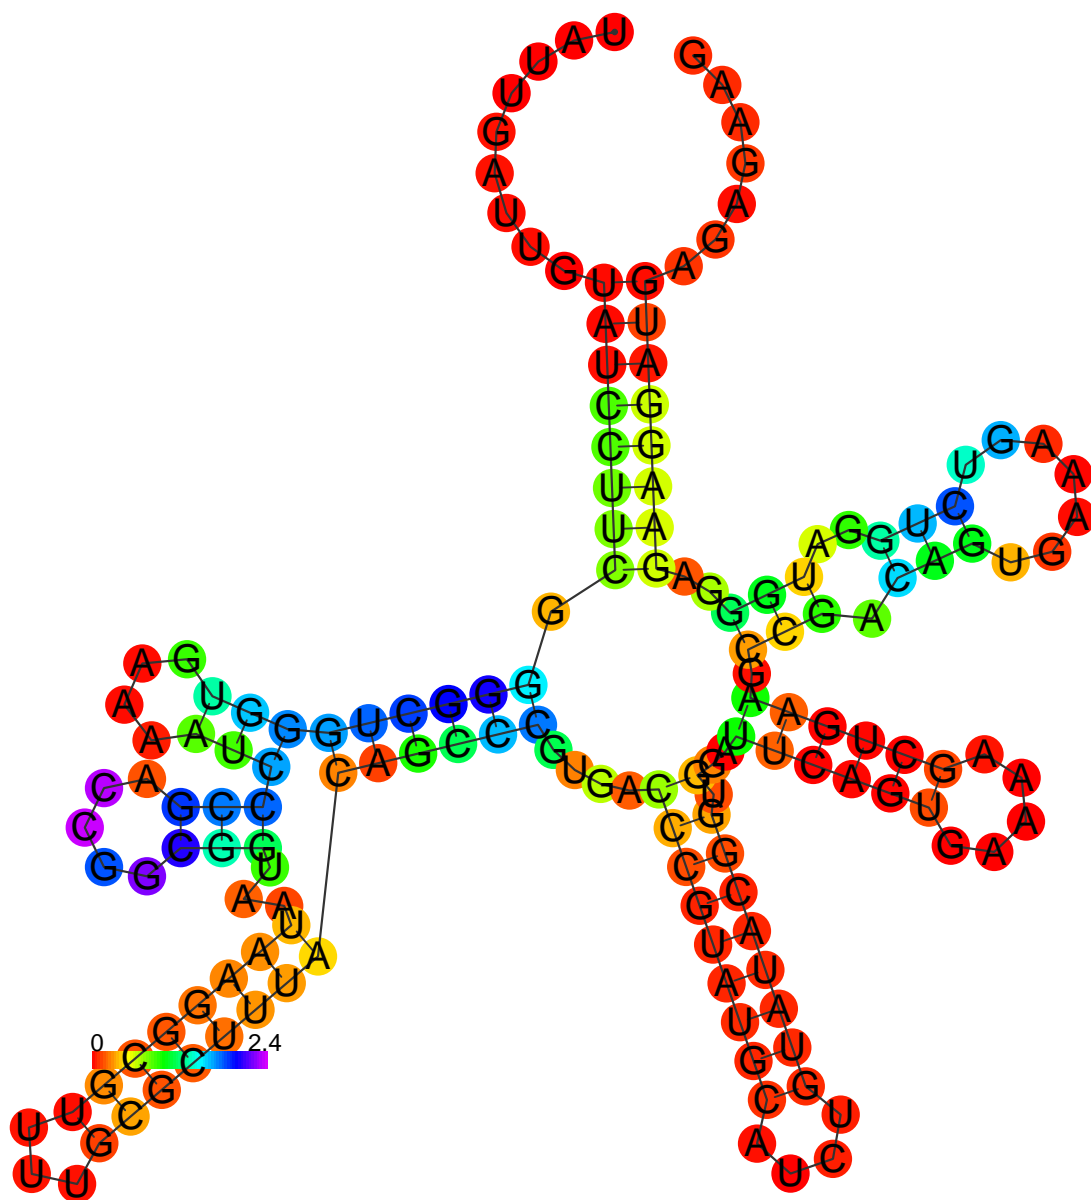

Supplement: Supplementary file 105 [file supplementary]

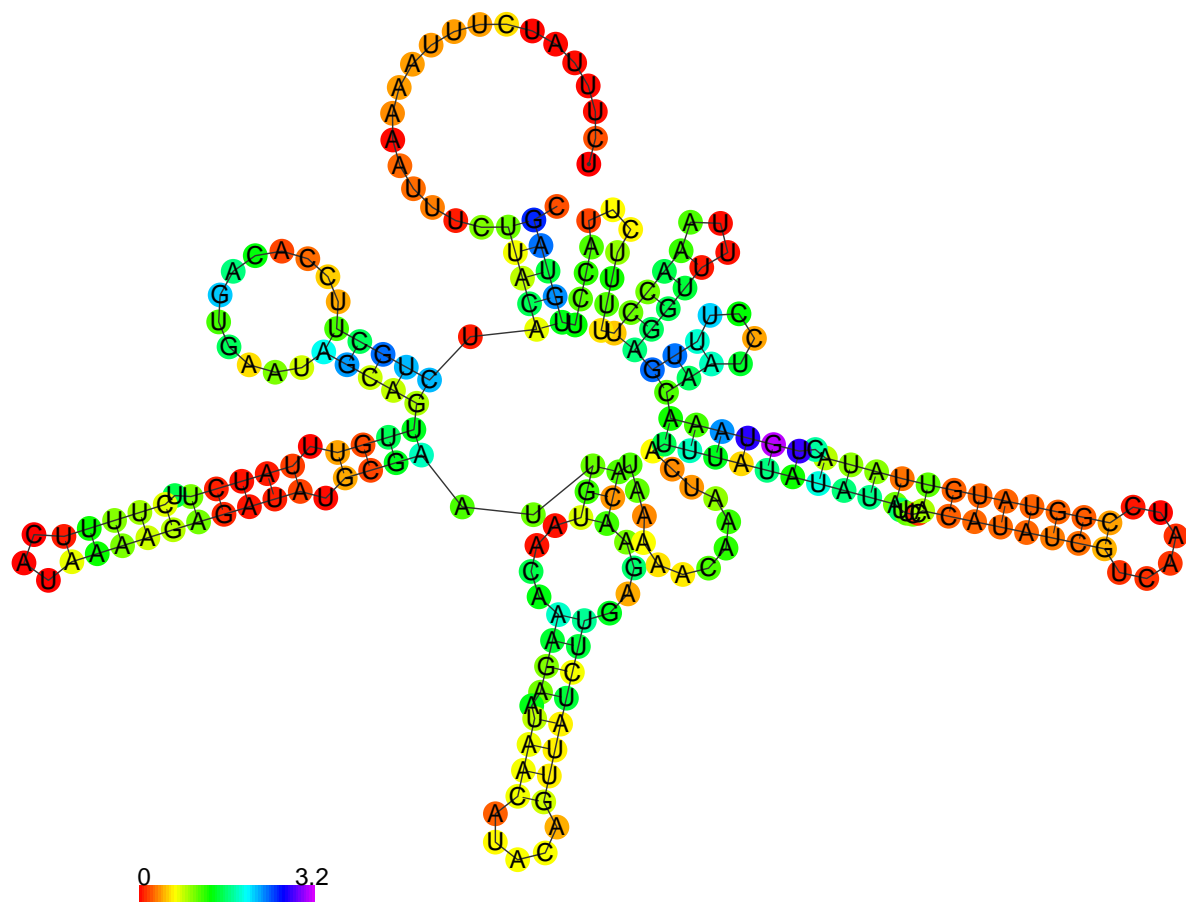

Supplement: Supplementary file 106 [file supplementary]

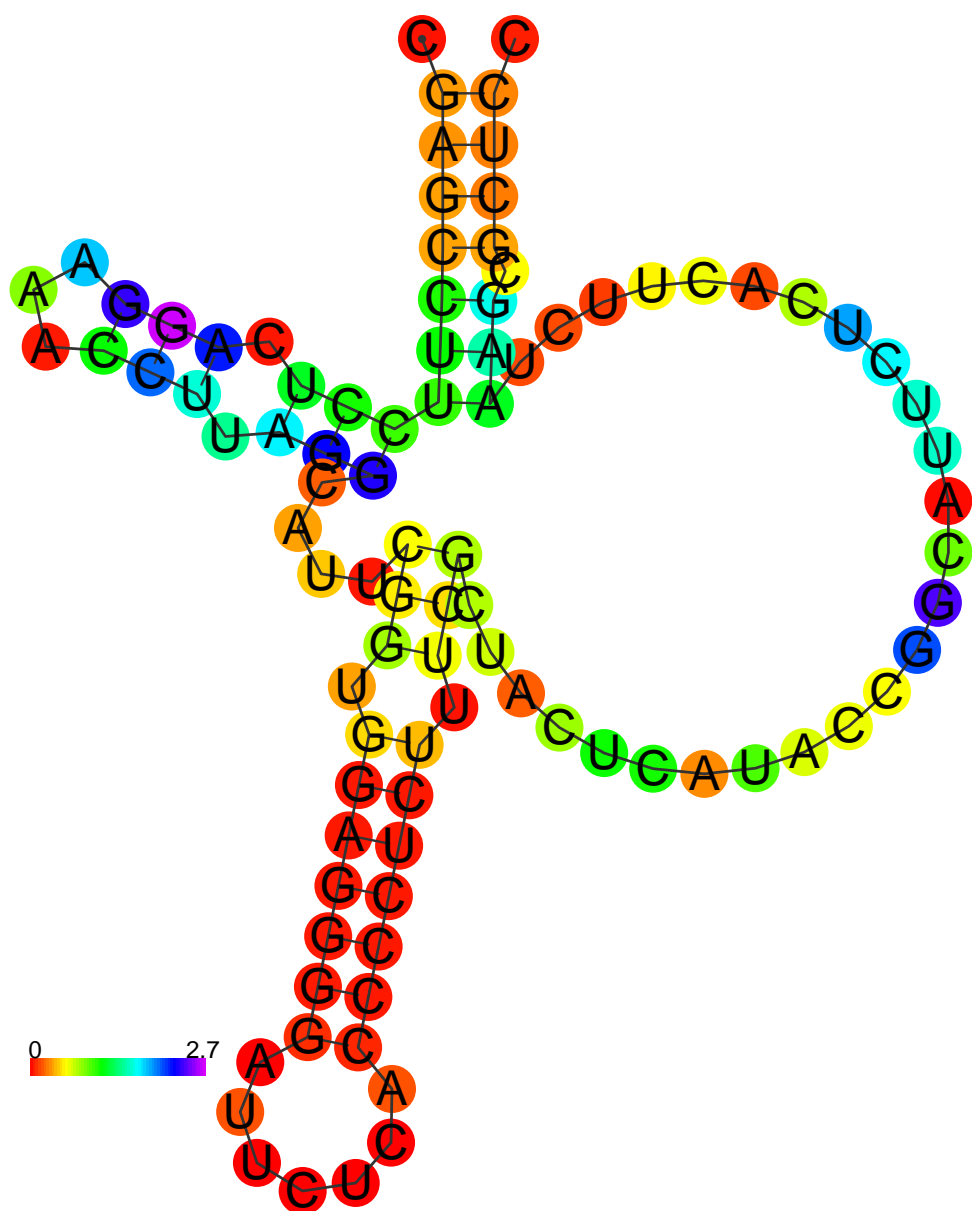

Supplement: Supplementary file 107 [file supplementary]

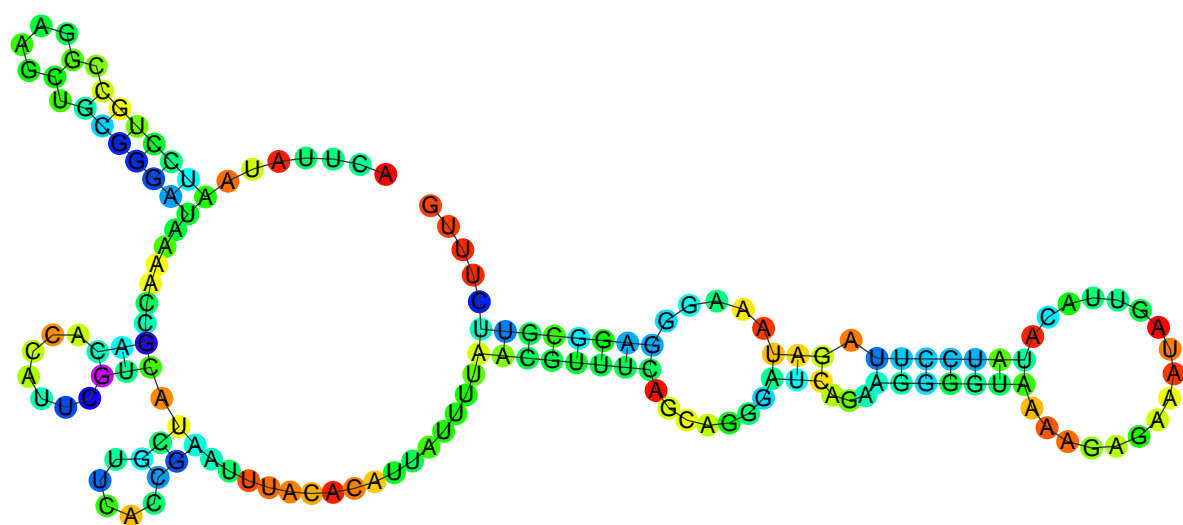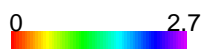

Supplement: Supplementary file 108 [file supplementary]

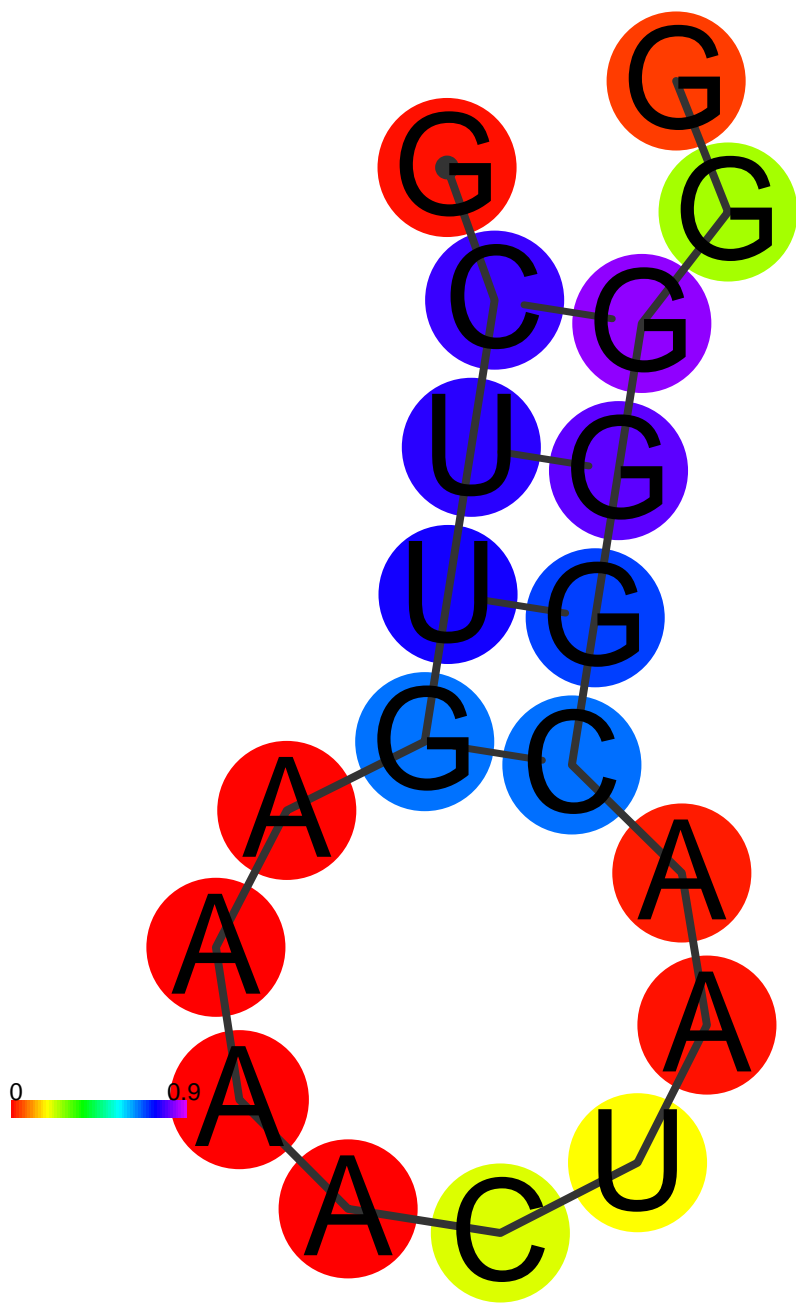

Supplement: Supplementary file 109 [file supplementary]

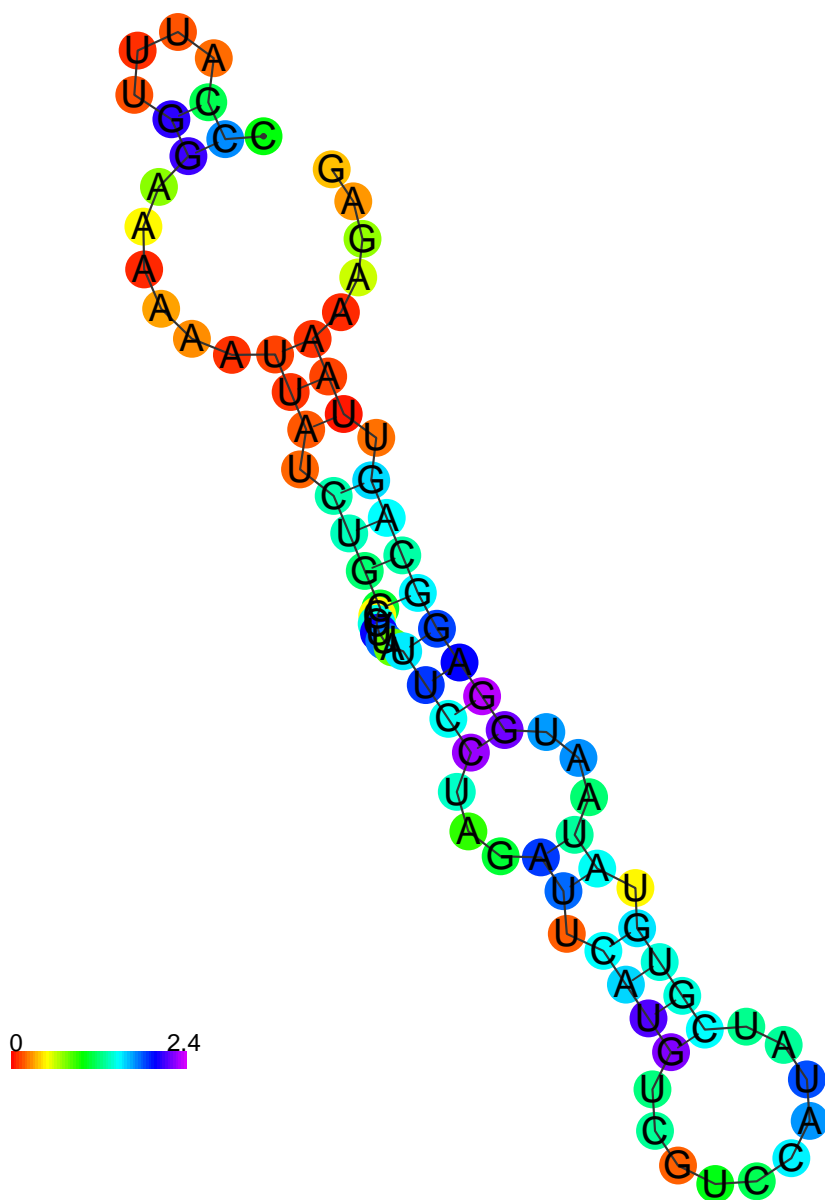

Supplement: Supplementary file 110 [file supplementary]

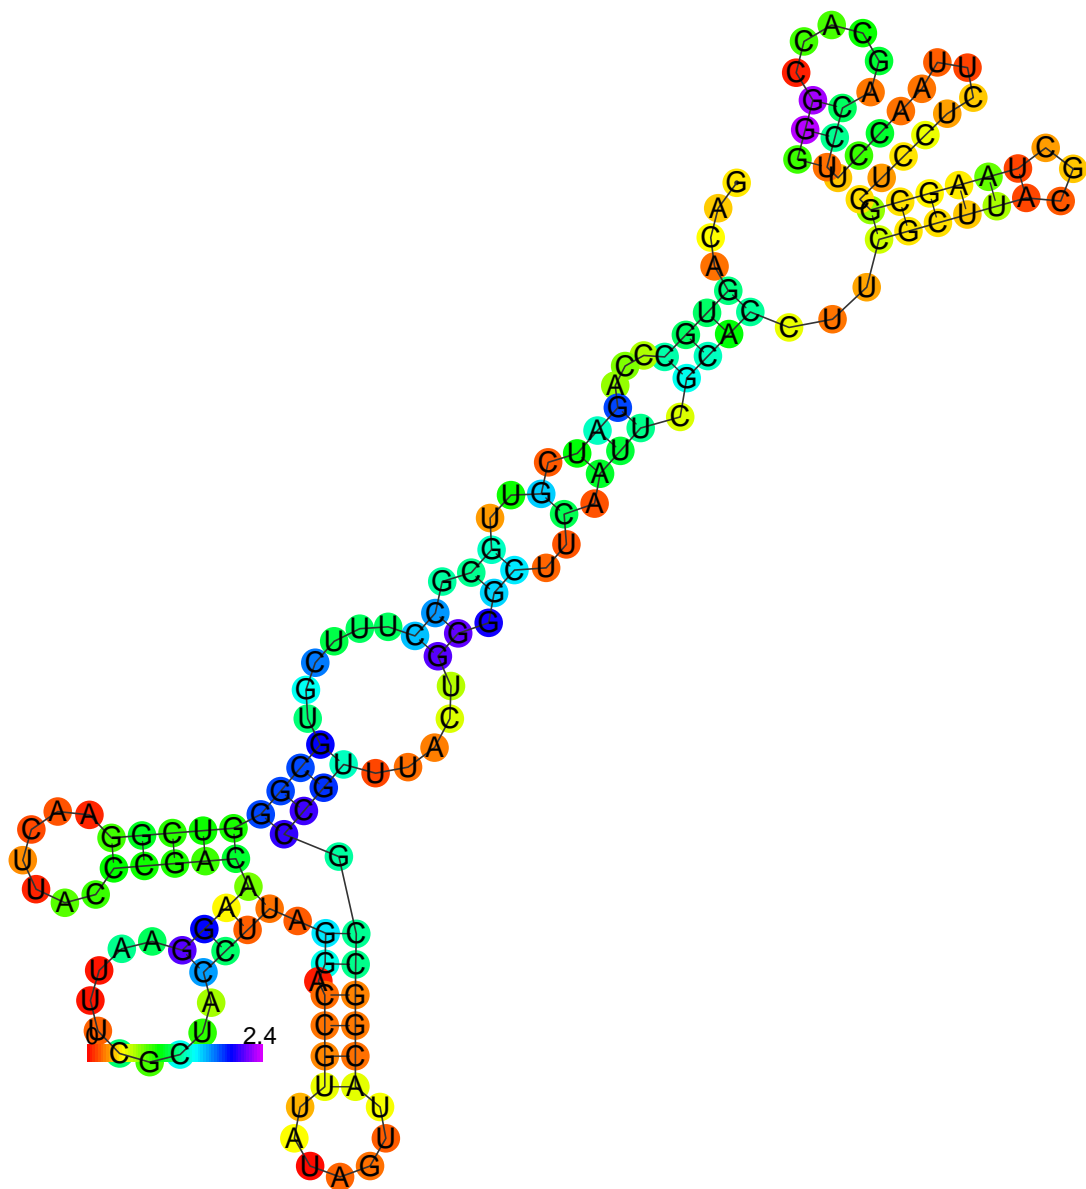

Supplement: Supplementary file 111 [file supplementary]

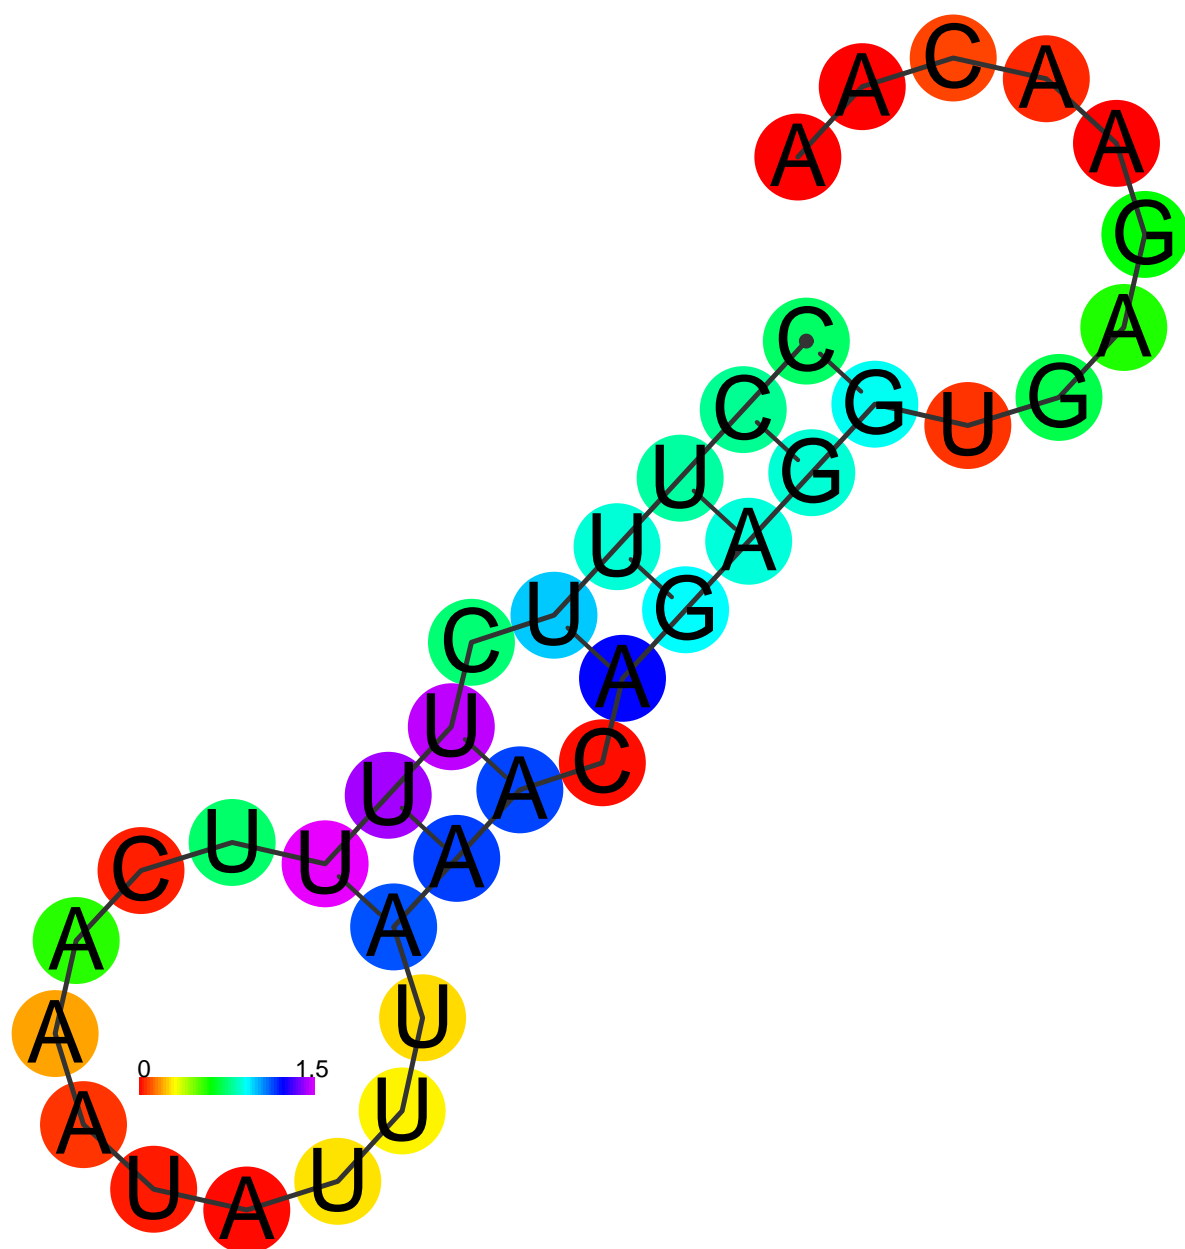

Supplement: Supplementary file 112 [file supplementary]

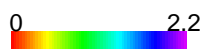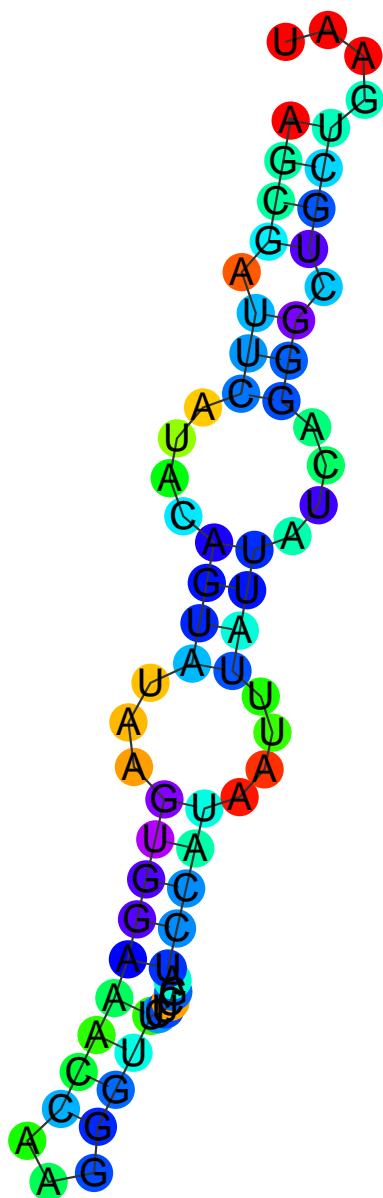

Supplement: Supplementary file 113 [file supplementary]

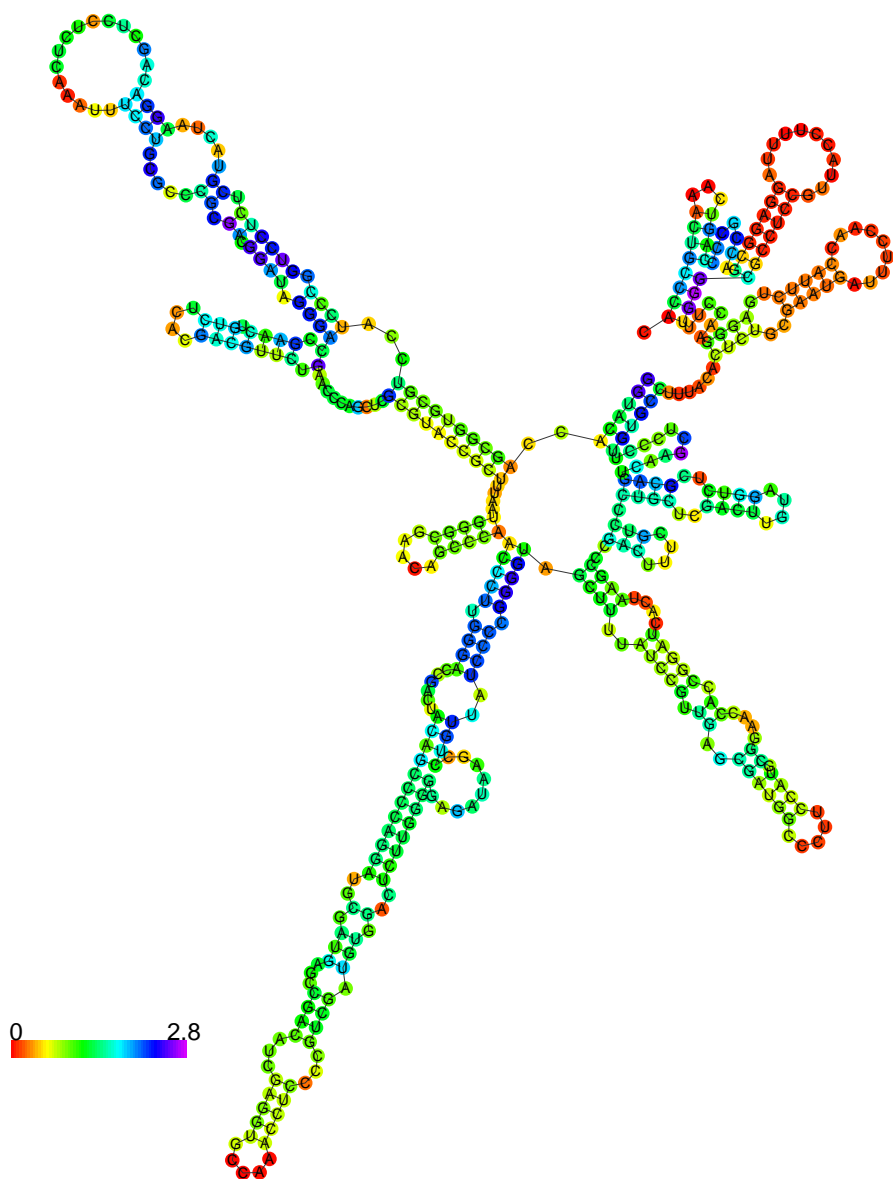

Supplement: Supplementary file 114 [file supplementary]

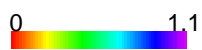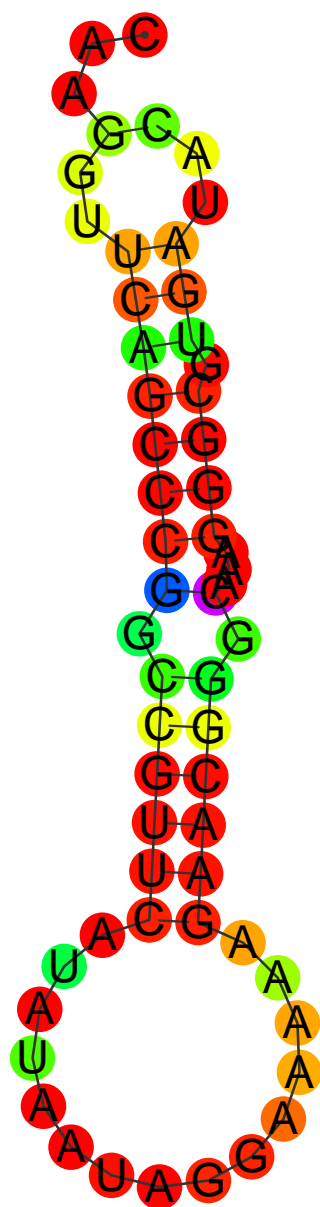

Supplement: Supplementary file 115 [file supplementary]

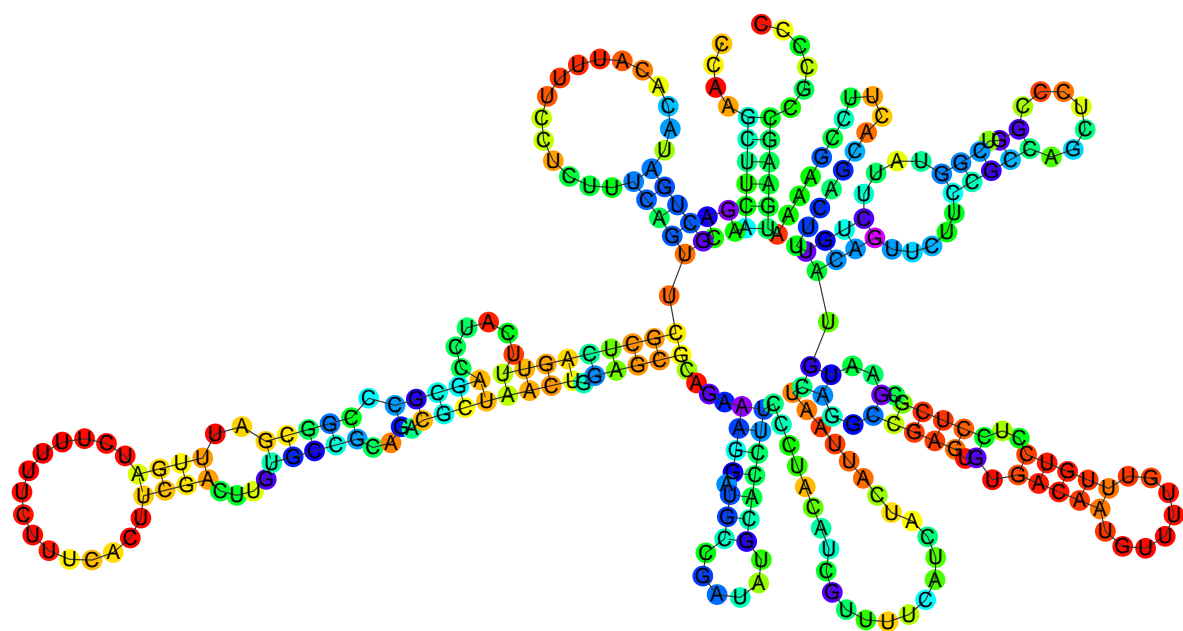

Supplement: Supplementary file 116 [file supplementary]

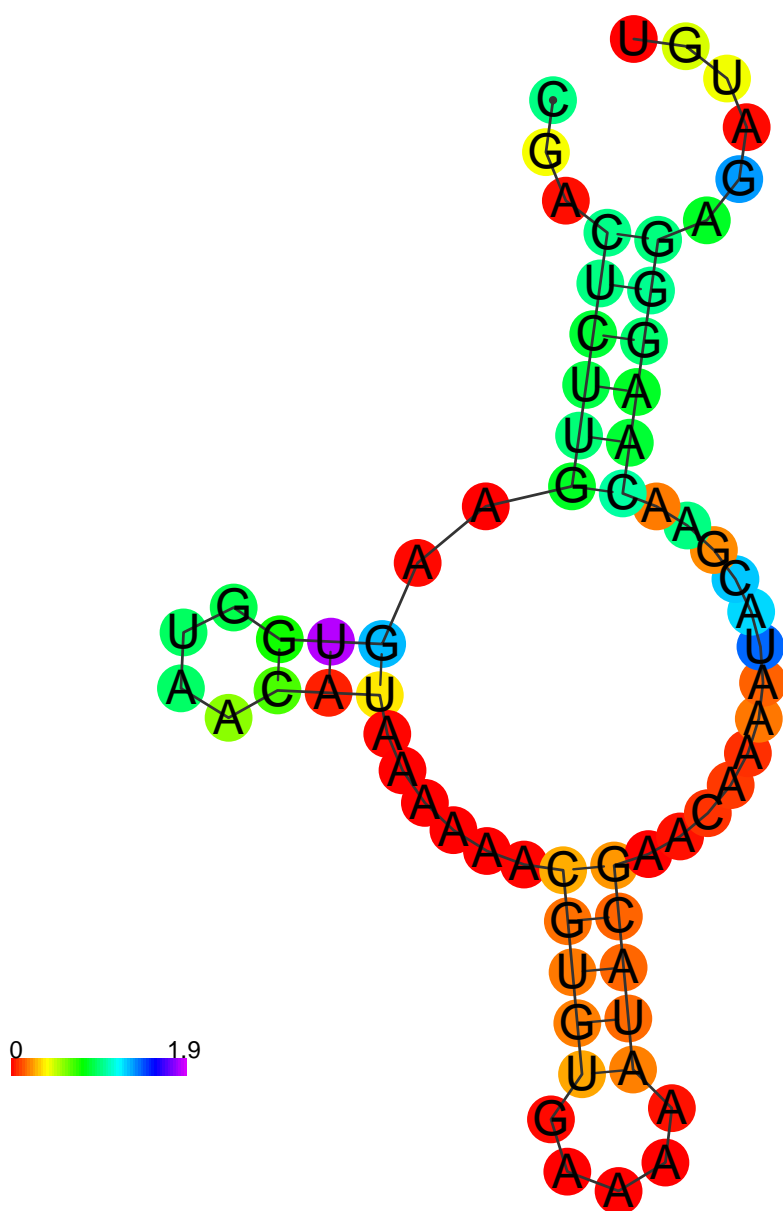

Supplement: Supplementary file 117 [file supplementary]

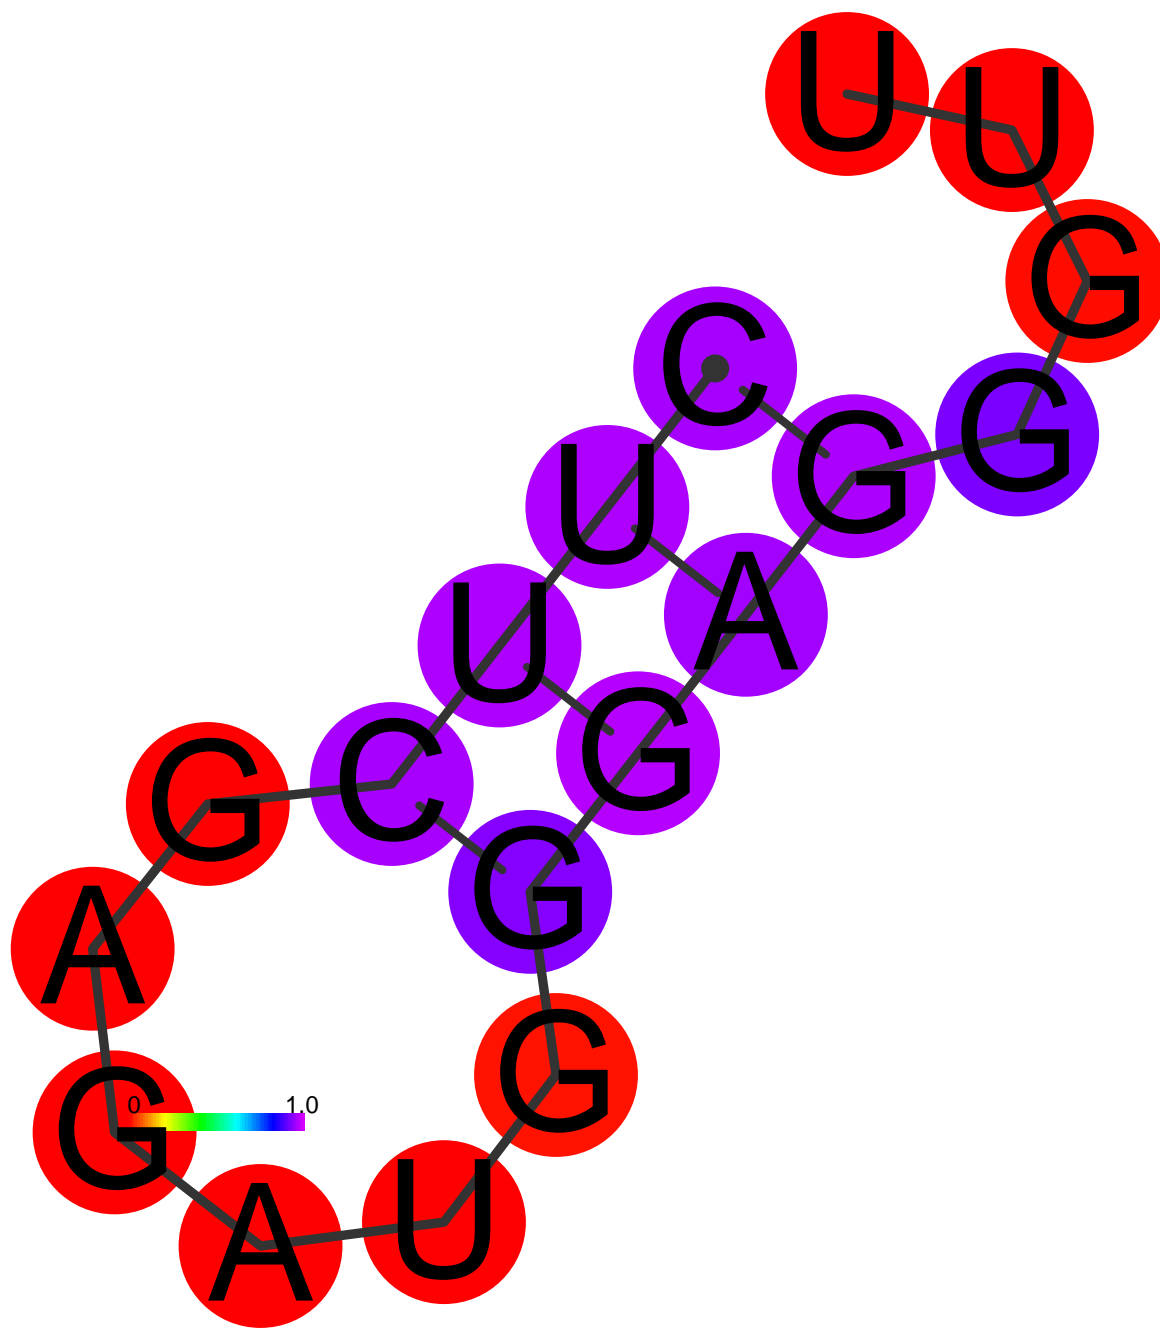

Supplement: Supplementary file 118 [file supplementary]

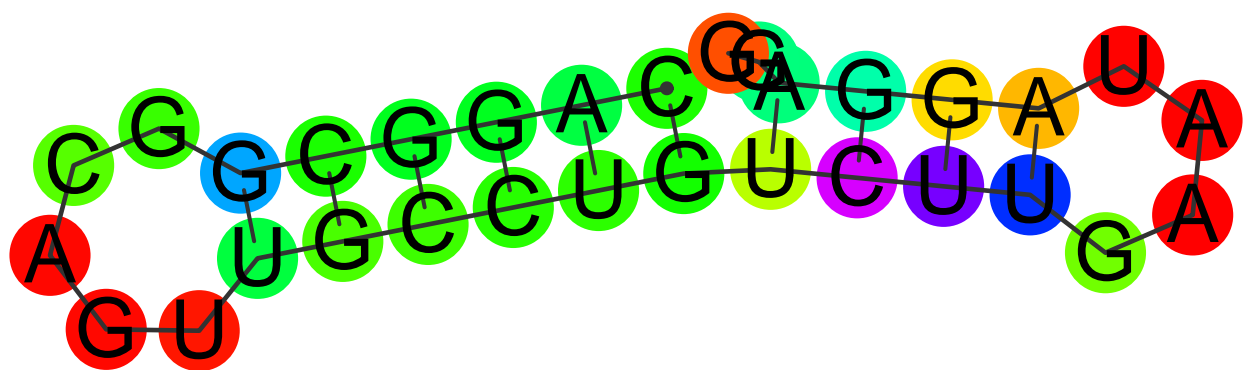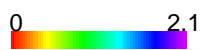

Supplement: Supplementary file 119 [file supplementary]

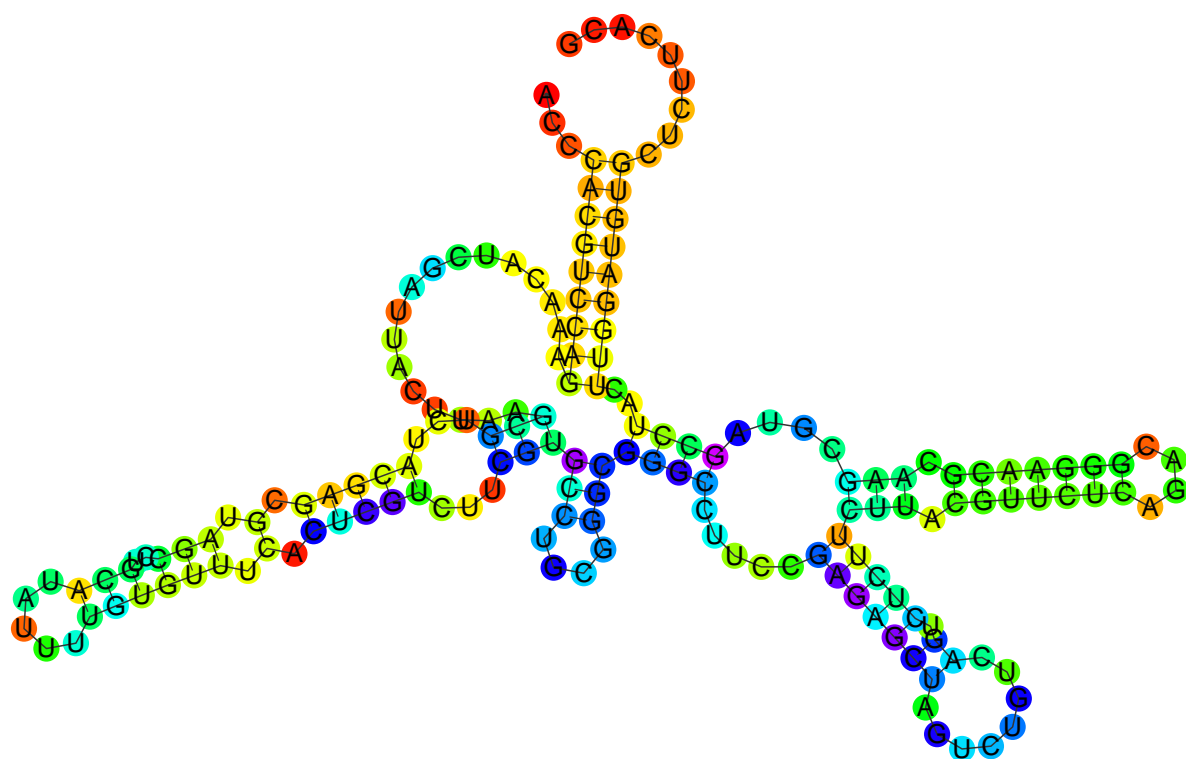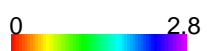

Supplement: Supplementary file 120 [file supplementary]

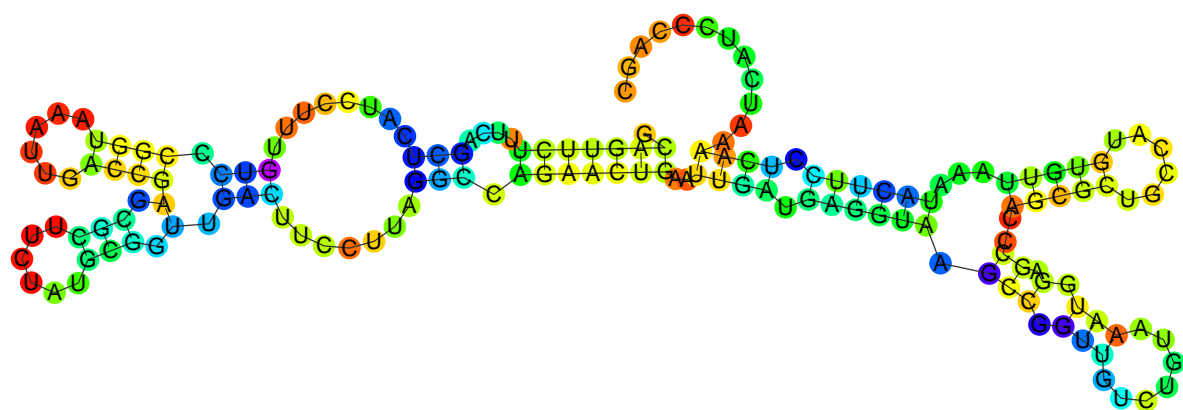

Supplement: Supplementary file 121 [file supplementary]

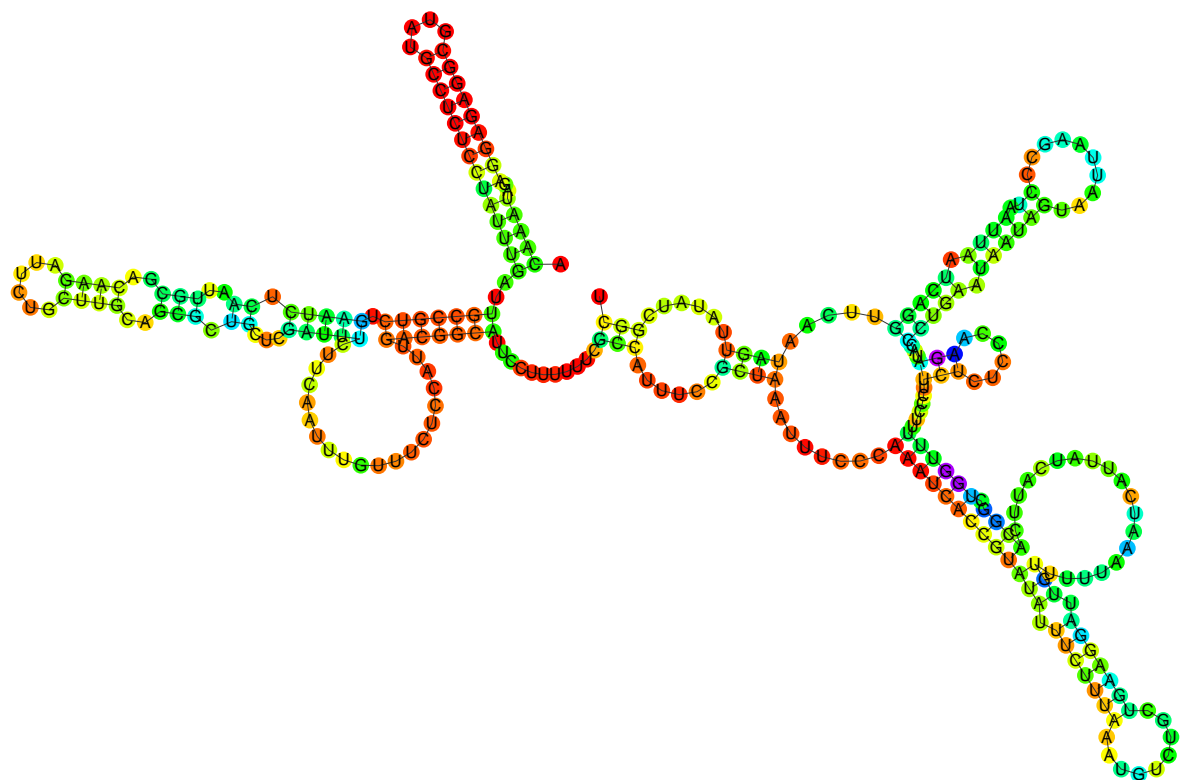

Supplement: Supplementary file 122 [file supplementary]



Supplement: Supplementary file 123 [file supplementary]

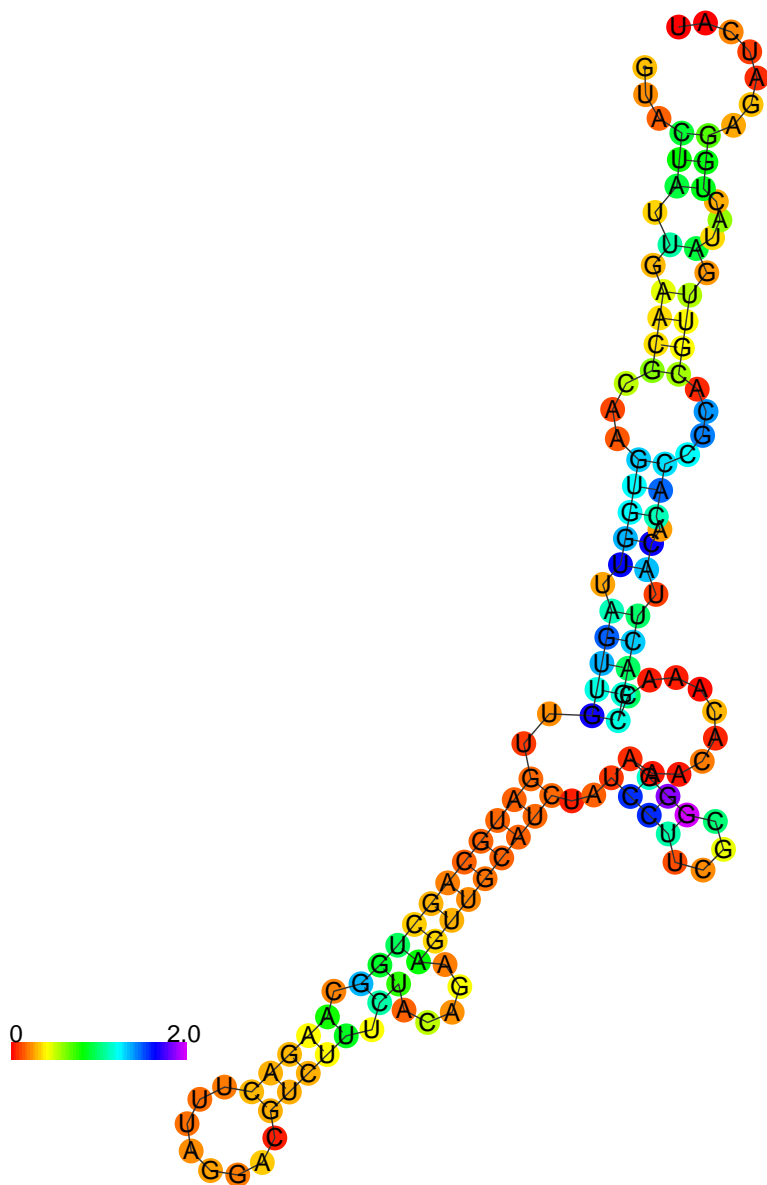

Supplement: Supplementary file 124 [file supplementary]

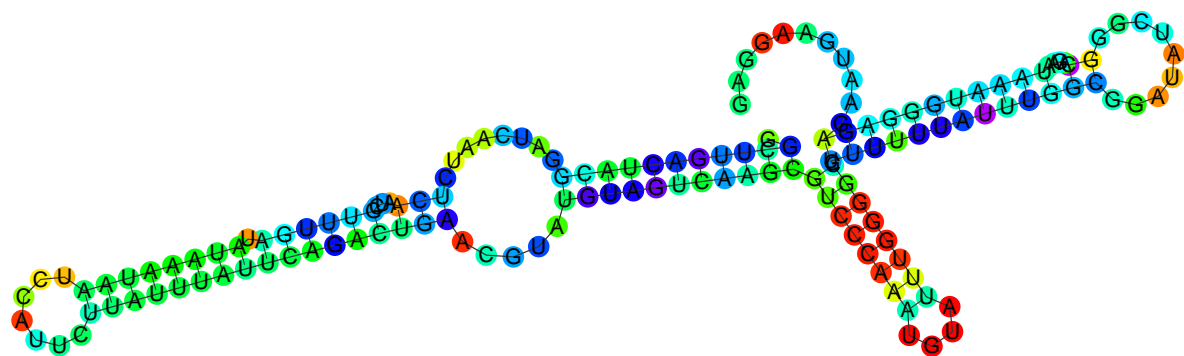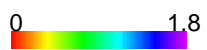

Supplement: Supplementary file 125 [file supplementary]

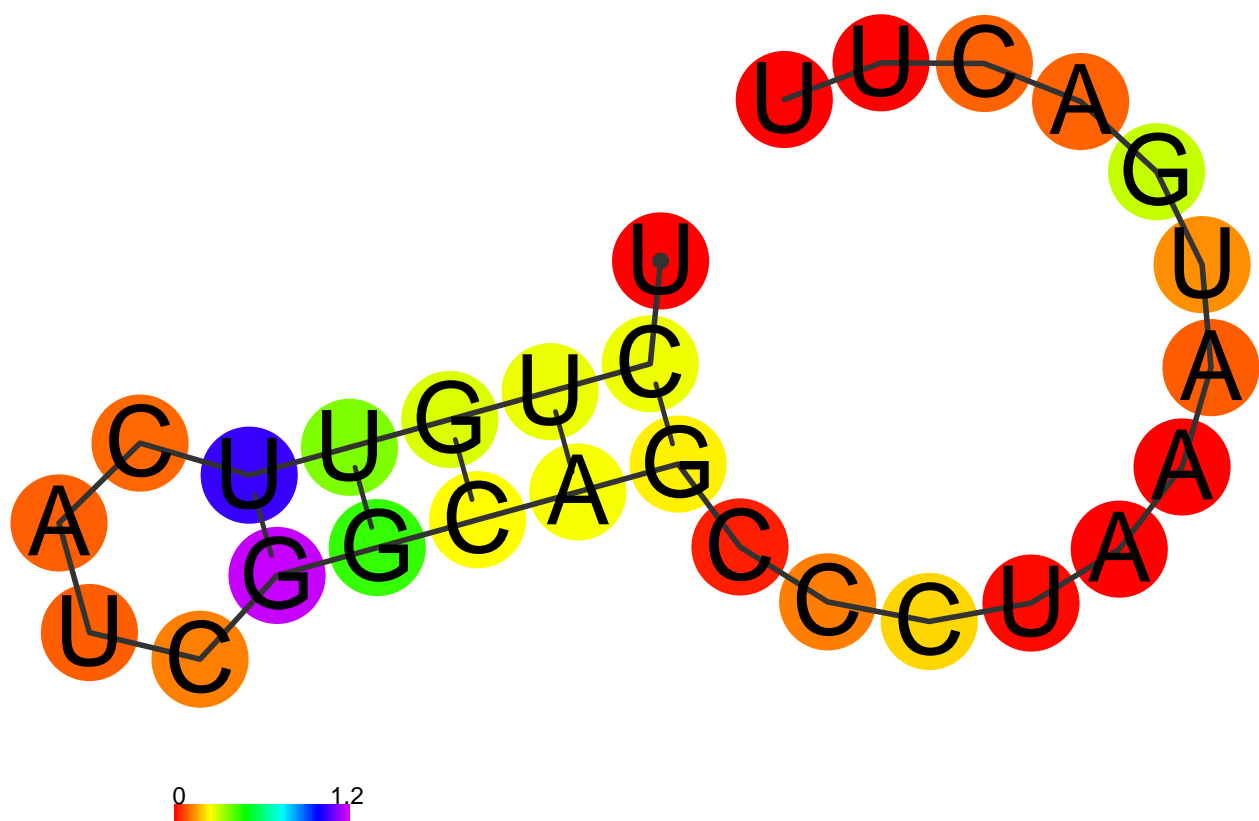

Supplement: Supplementary file 126 [file supplementary]

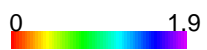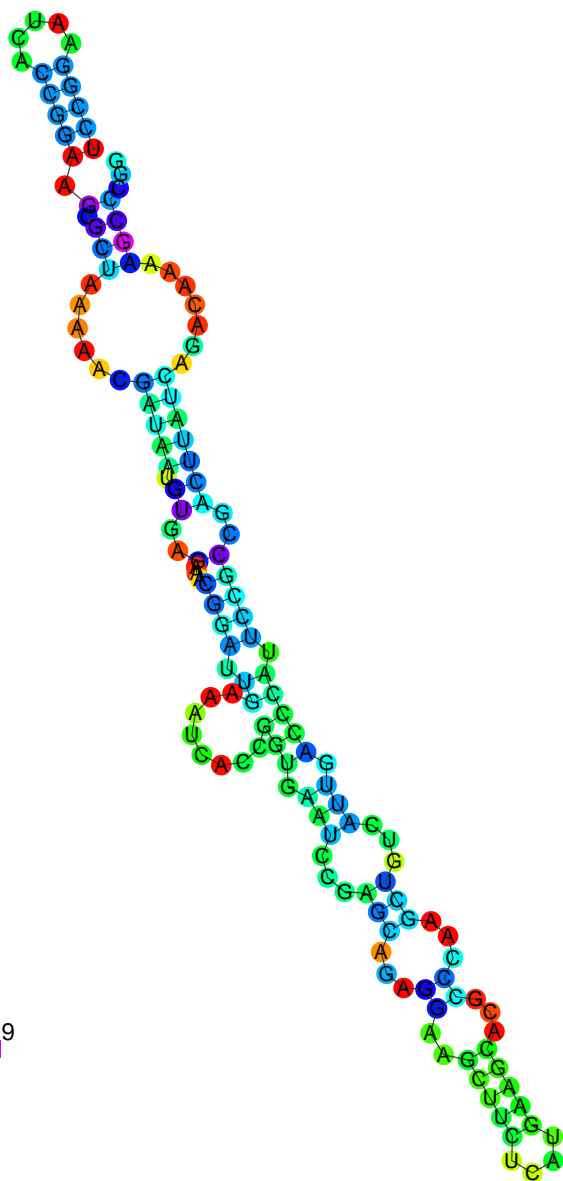

Supplement: Supplementary file 127 [file supplementary]

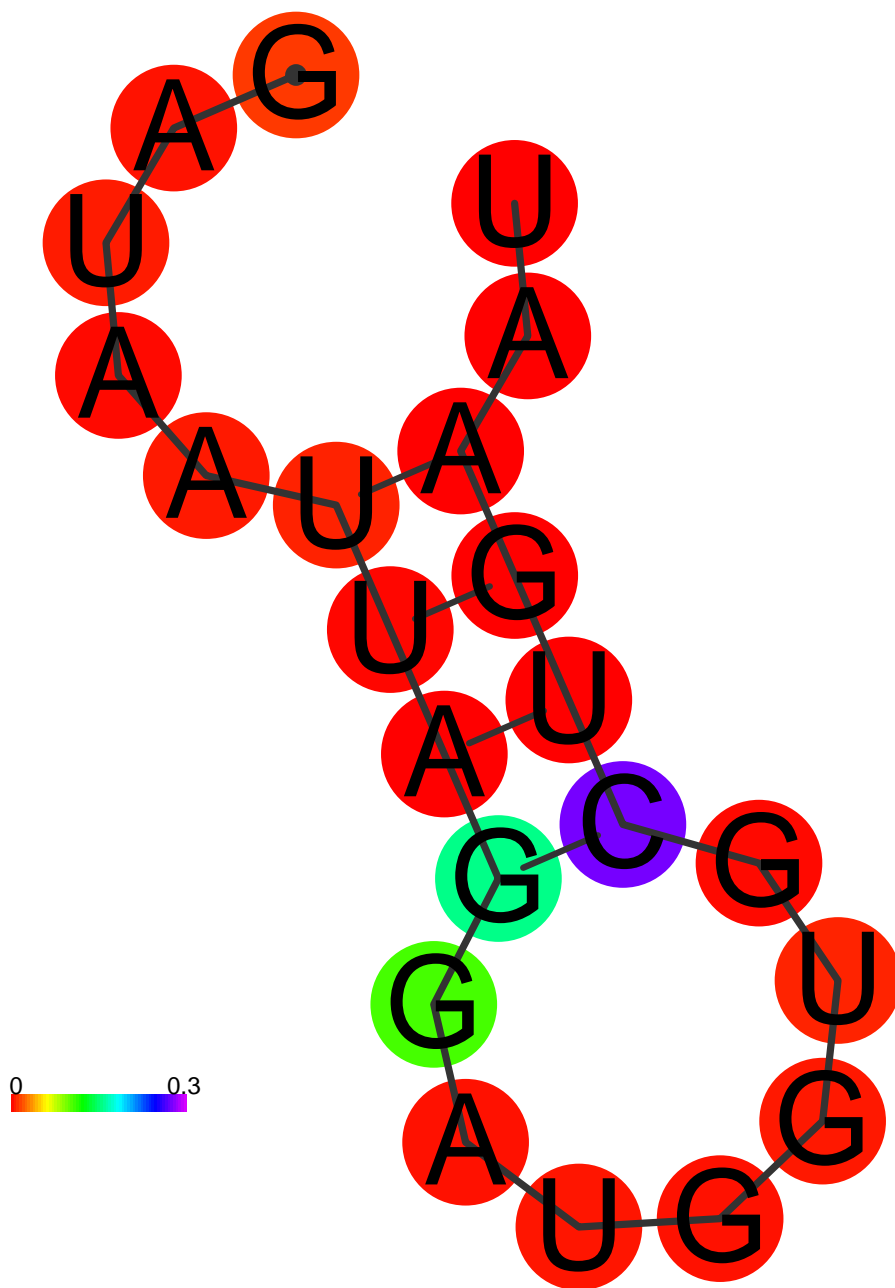

Supplement: Supplementary file 128 [file supplementary]

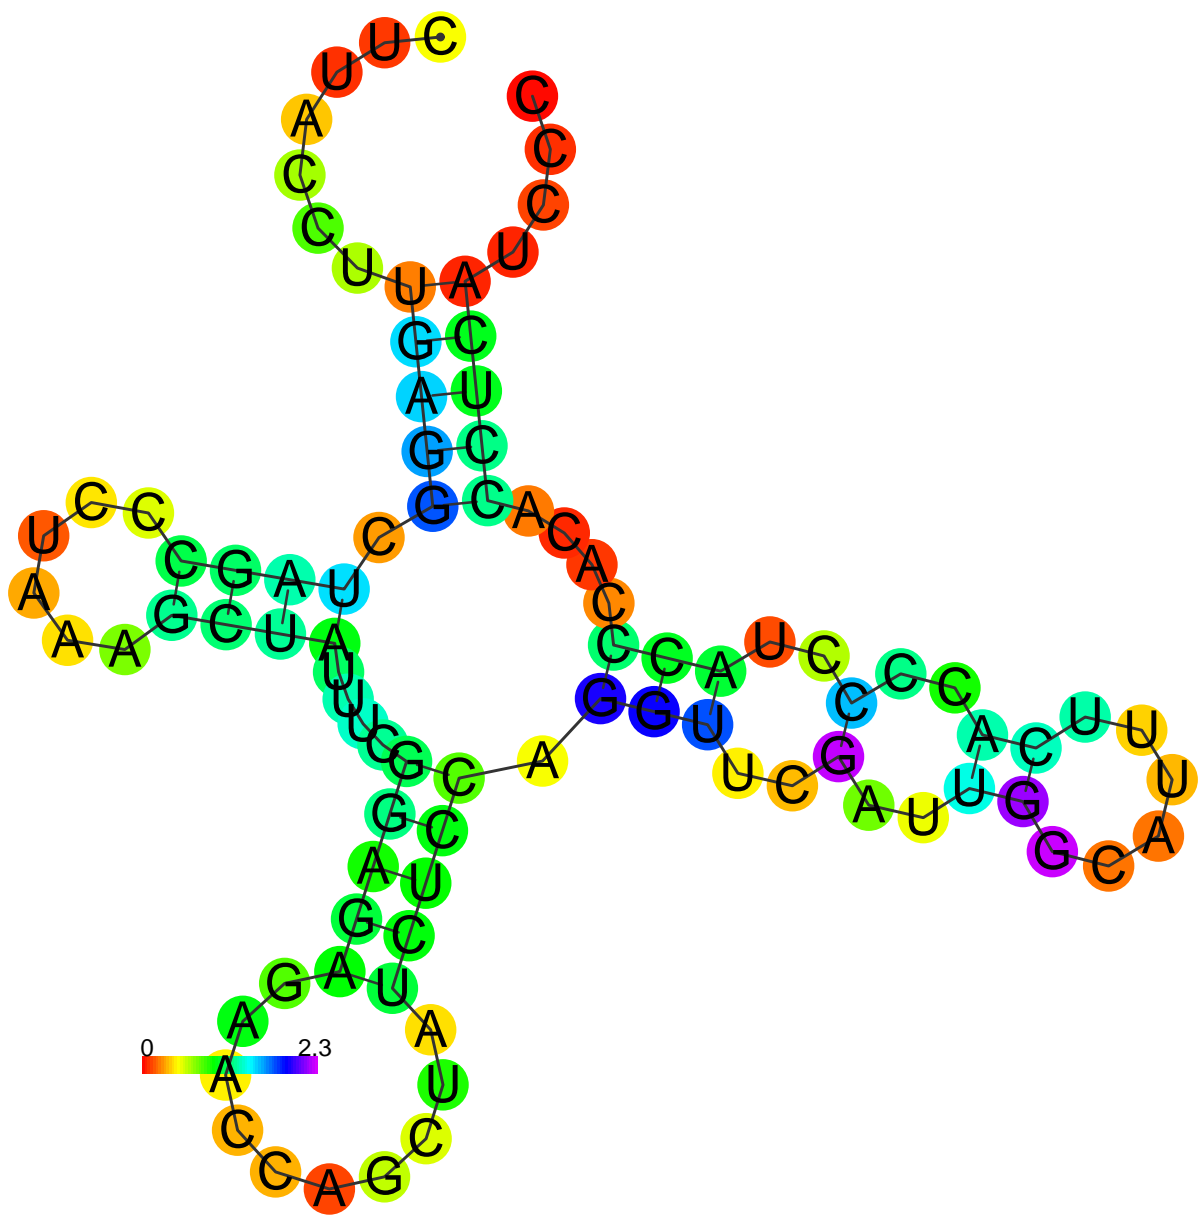

Supplement: Supplementary file 129 [file supplementary]

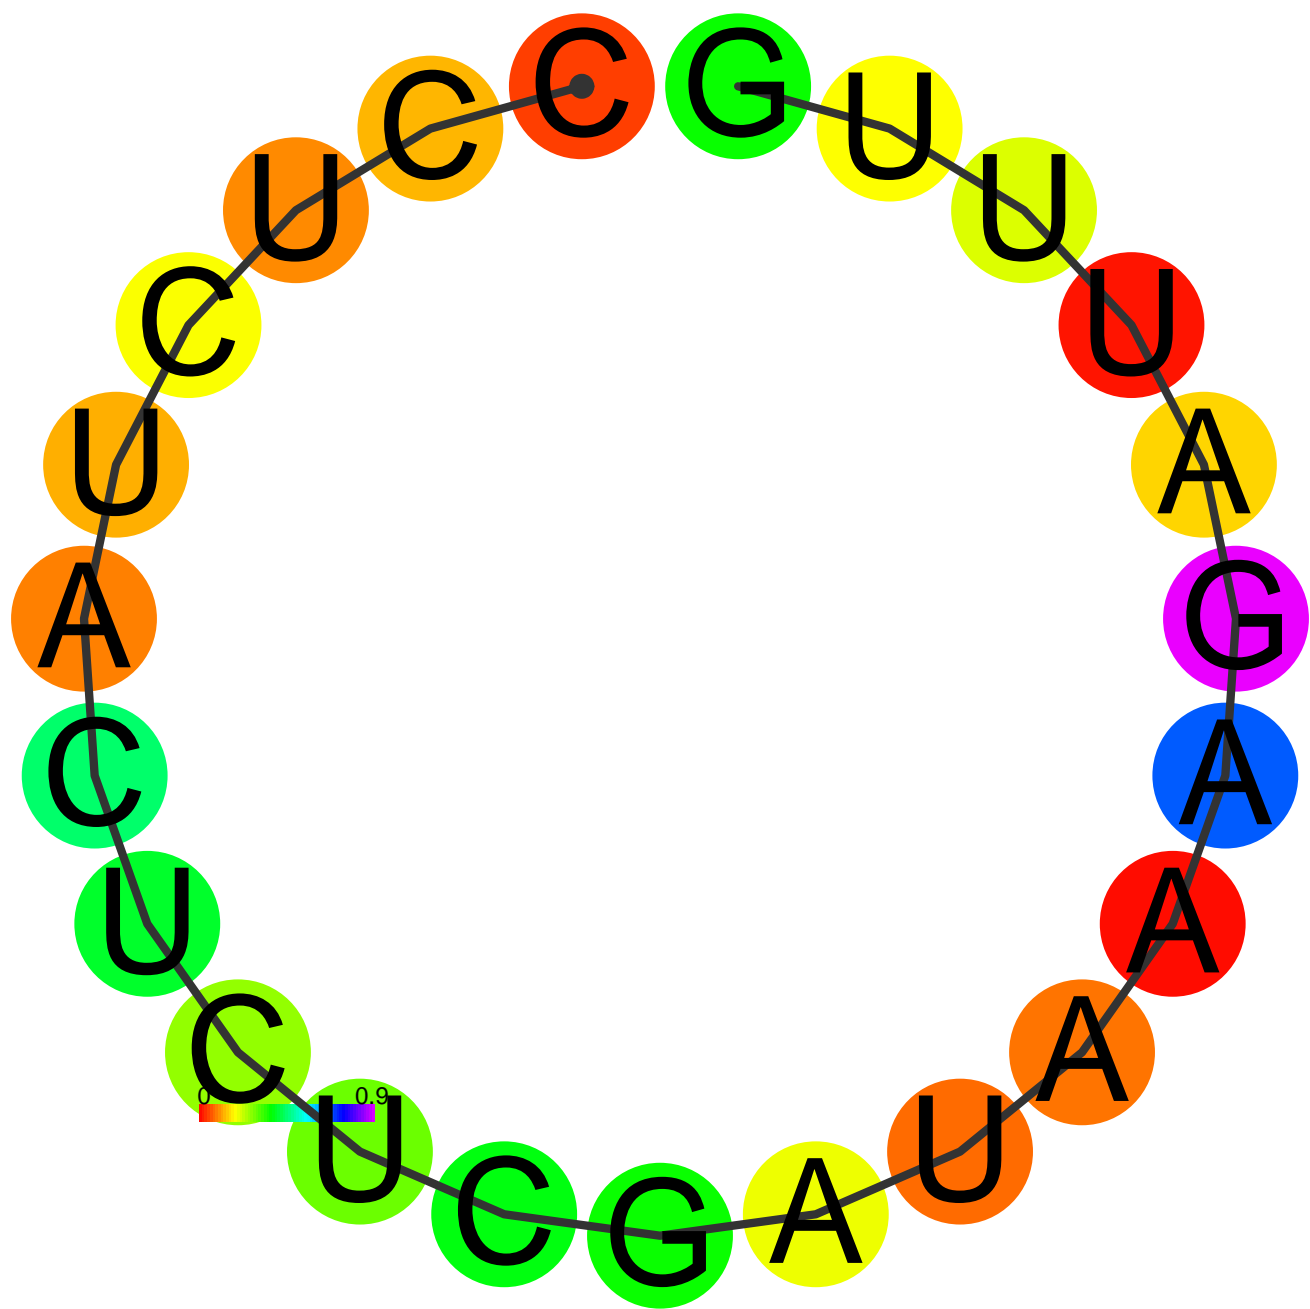

Supplement: Supplementary file 130 [file supplementary]



Supplement: Supplementary file 131 [file supplementary]

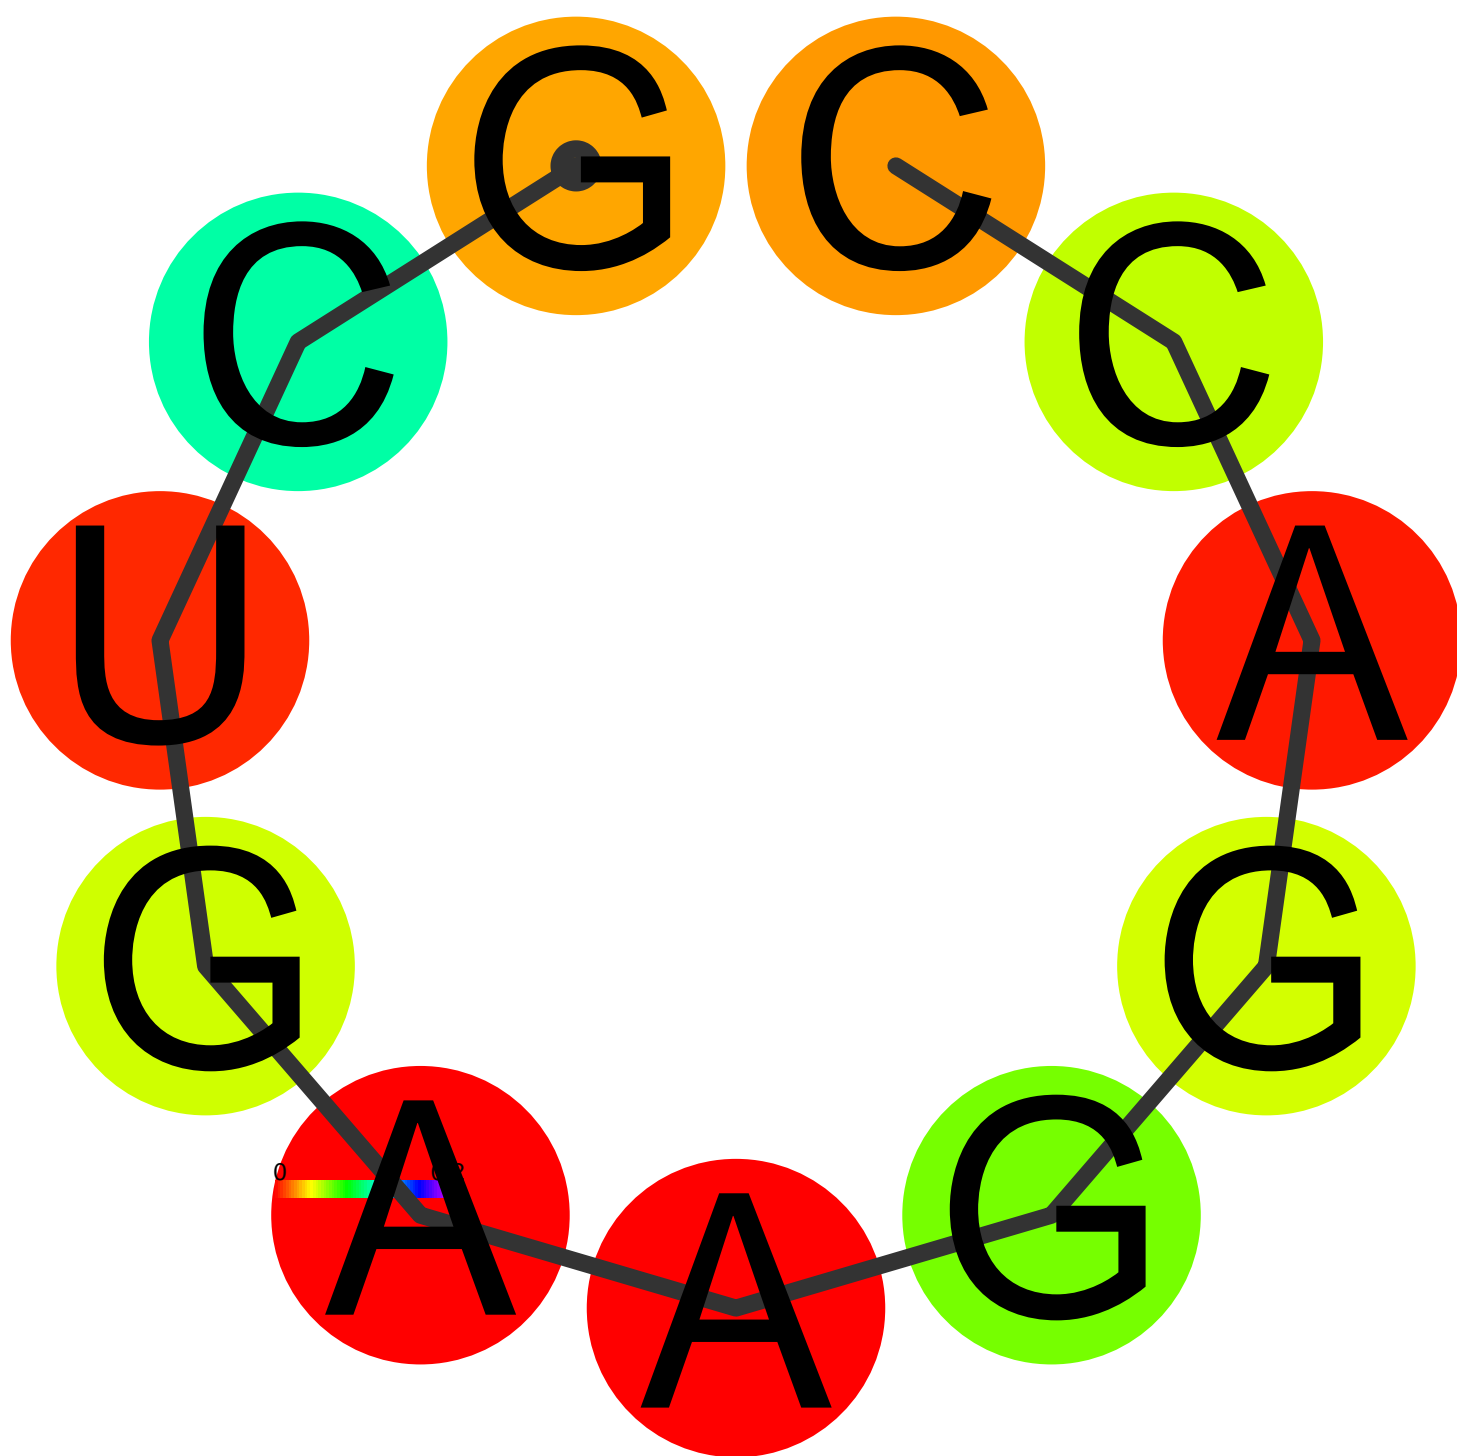

Supplement: Supplementary file 132 [file supplementary]

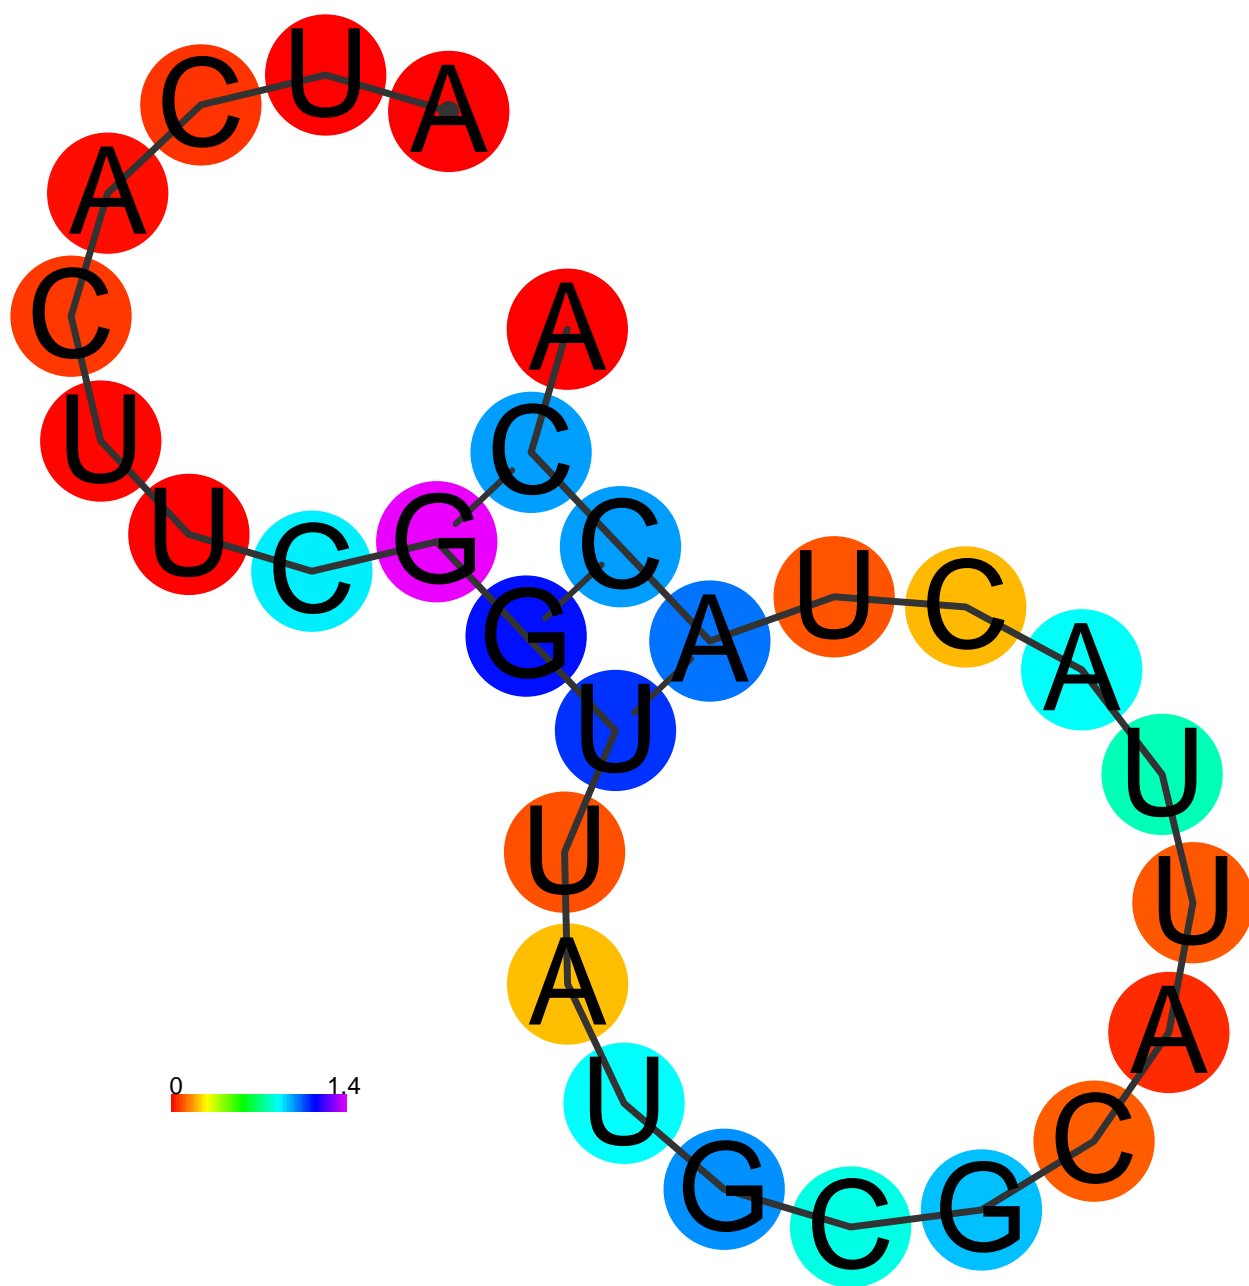

Supplement: Supplementary file 133 [file supplementary]

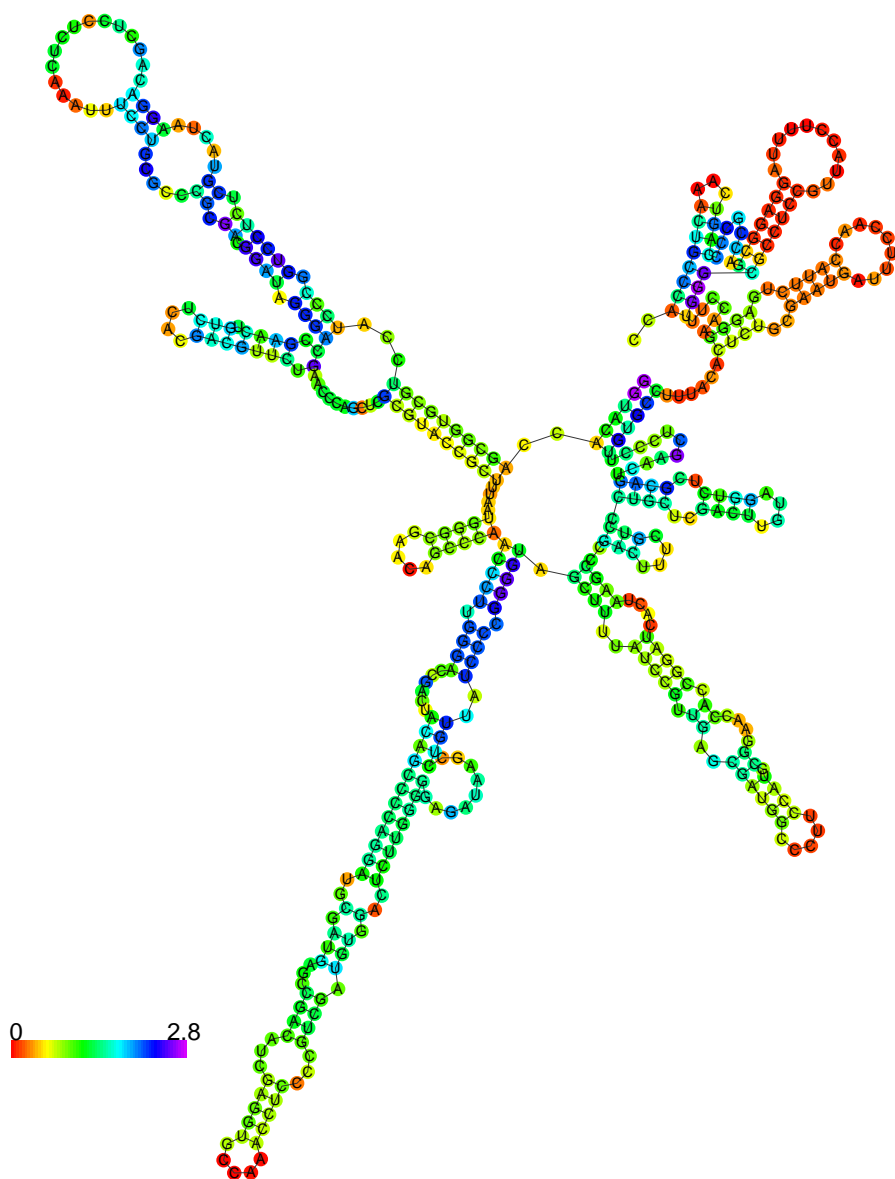

Supplement: Supplementary file 134 [file supplementary]

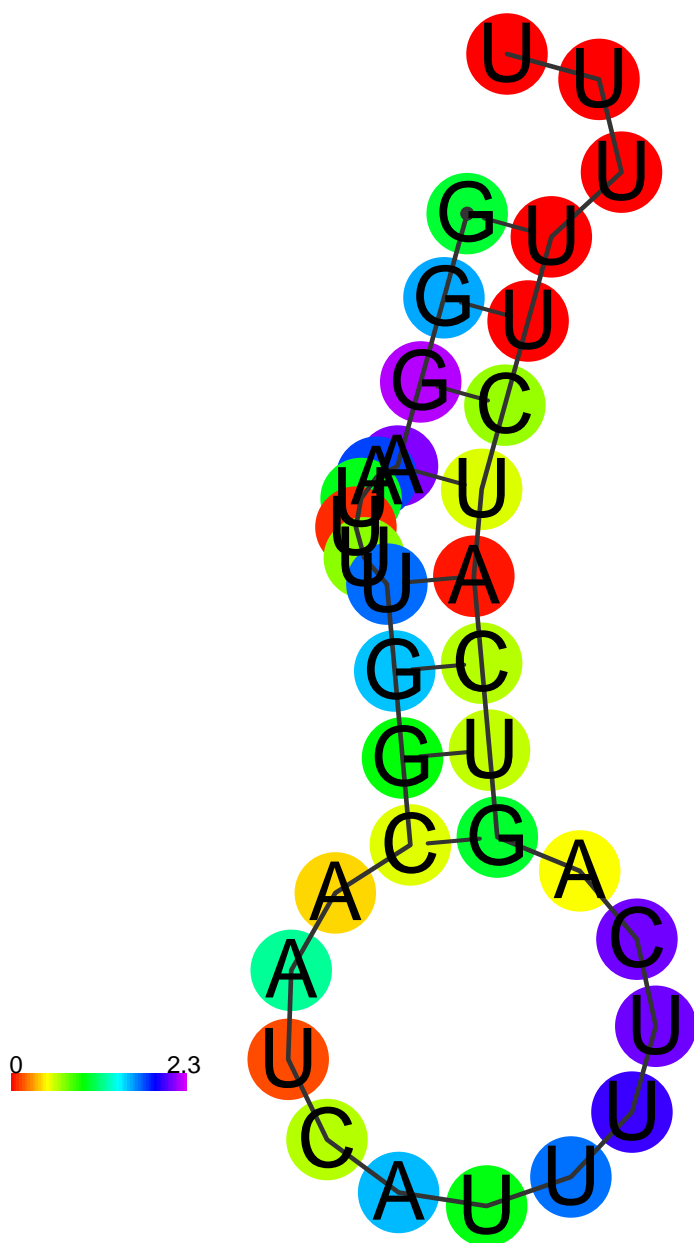

Supplement: Supplementary file 135 [file supplementary]

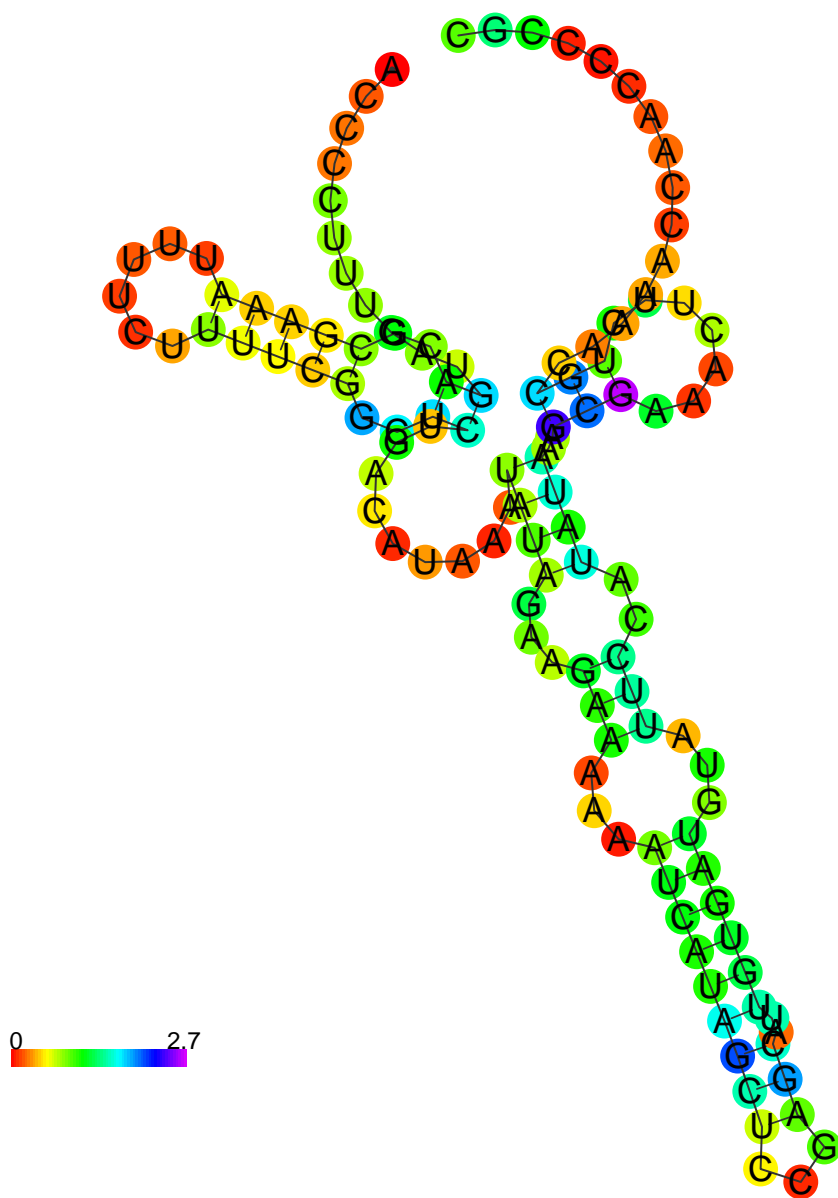

Supplement: Supplementary file 136 [file supplementary]

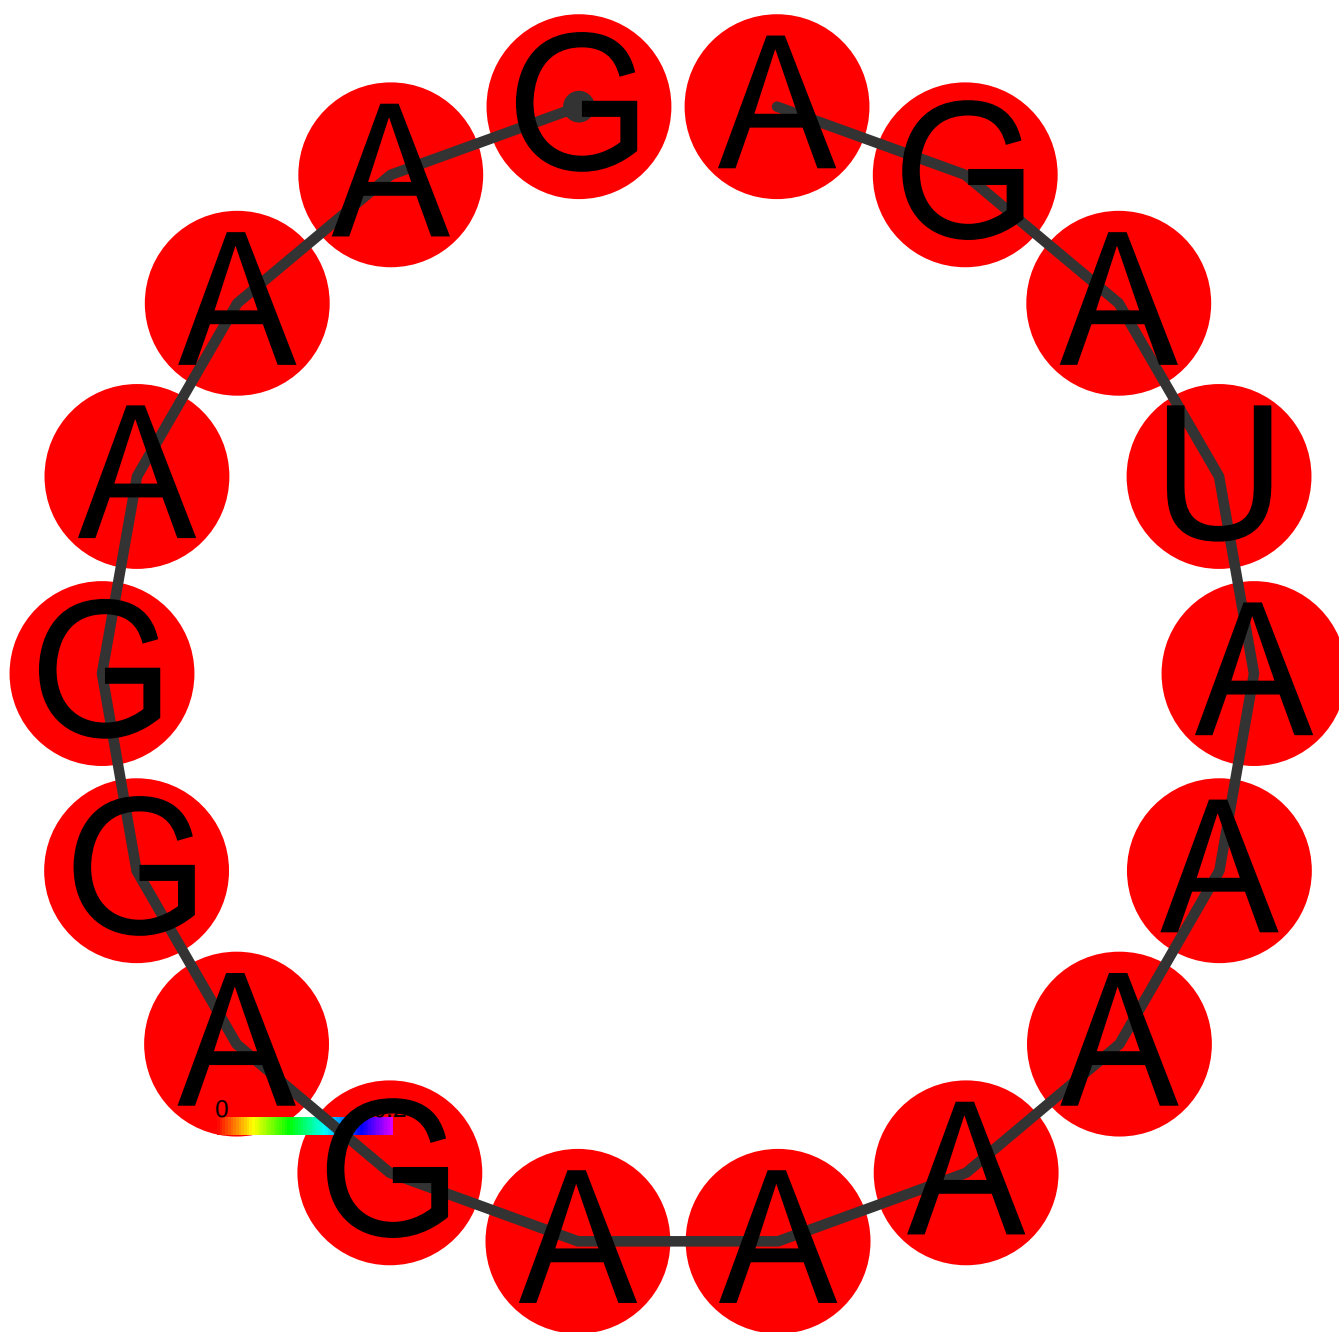

Supplement: Supplementary file 137 [file supplementary]

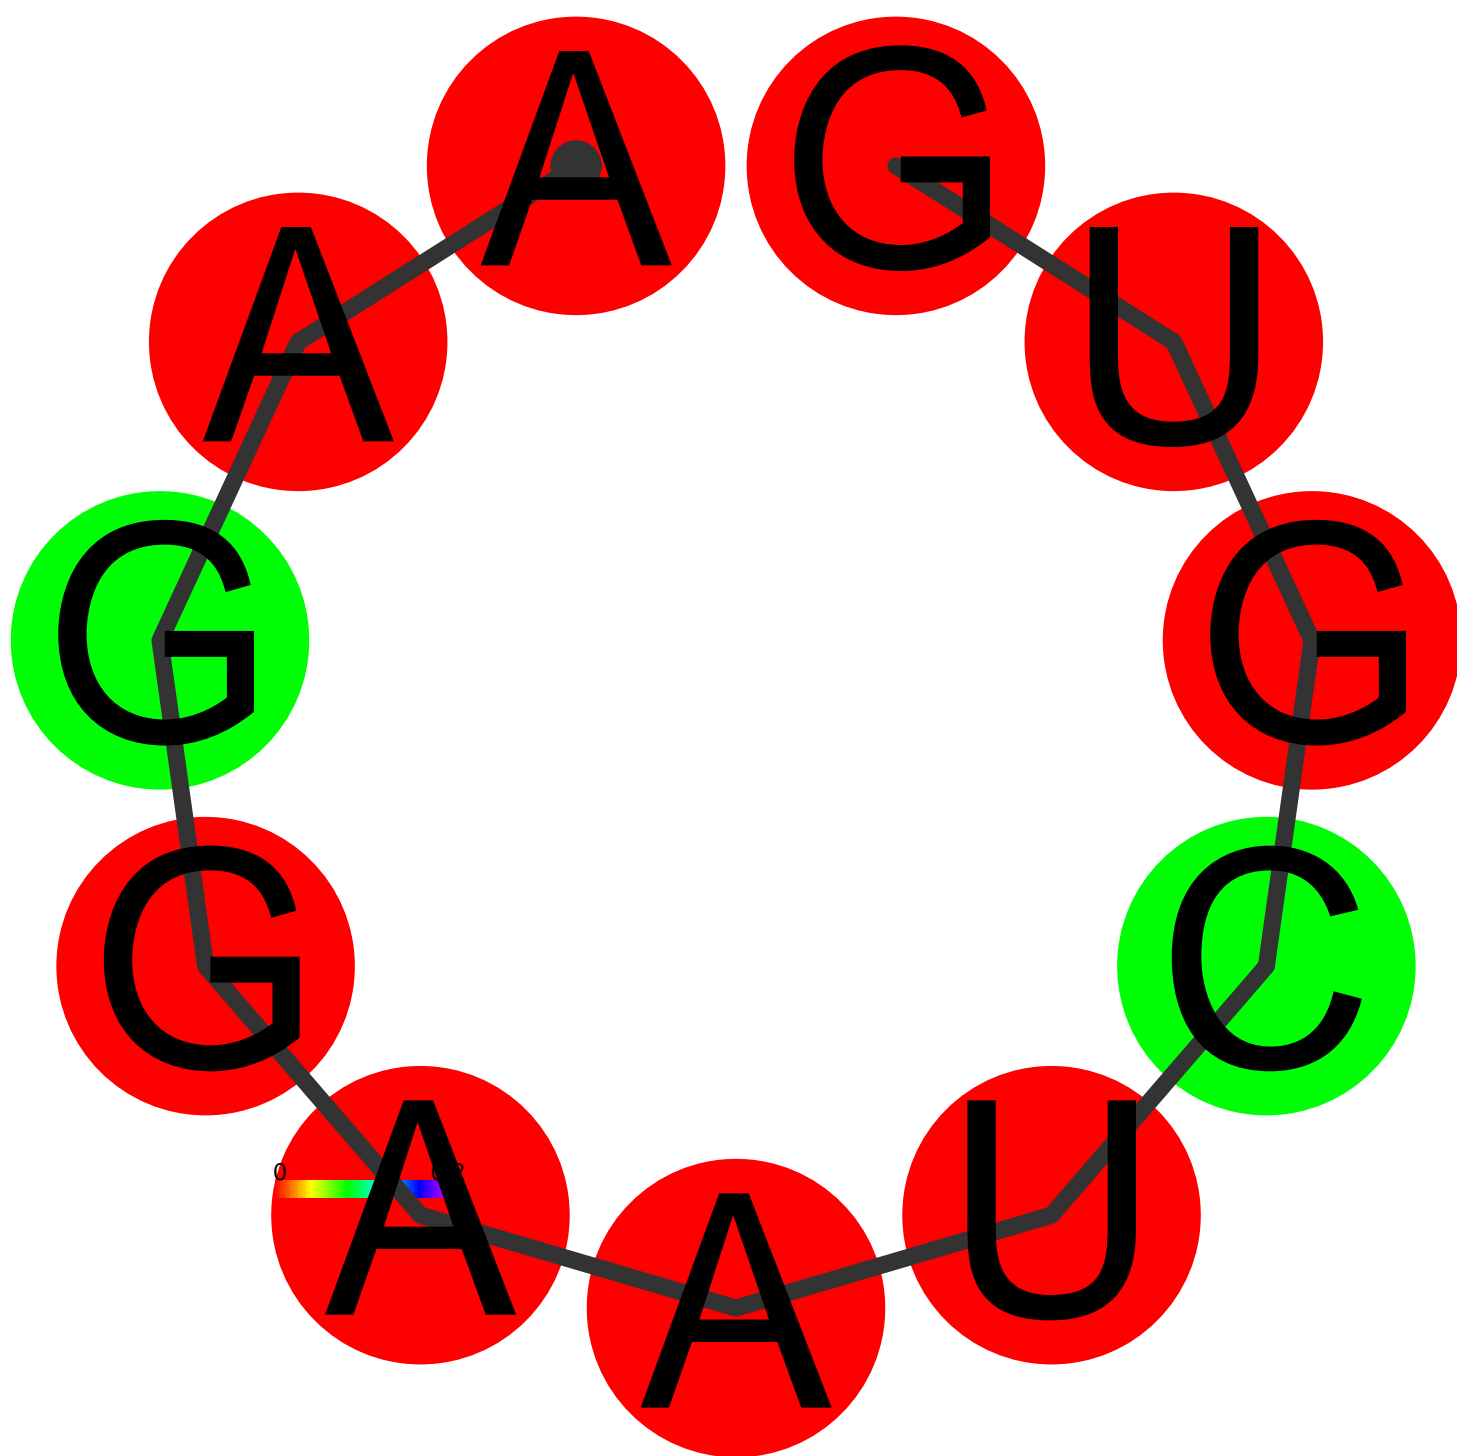

Supplement: Supplementary file 138 [file supplementary]

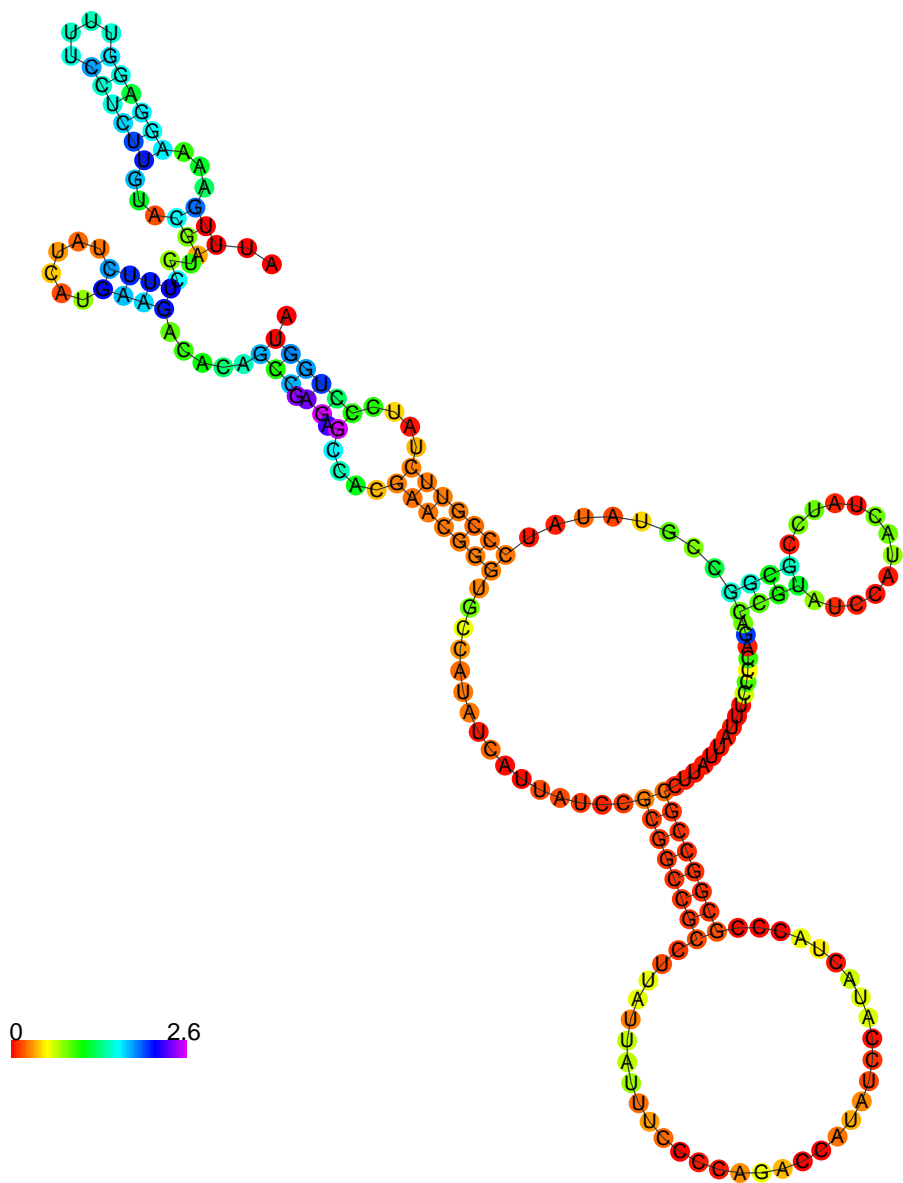

Supplement: Supplementary file 139 [file supplementary]

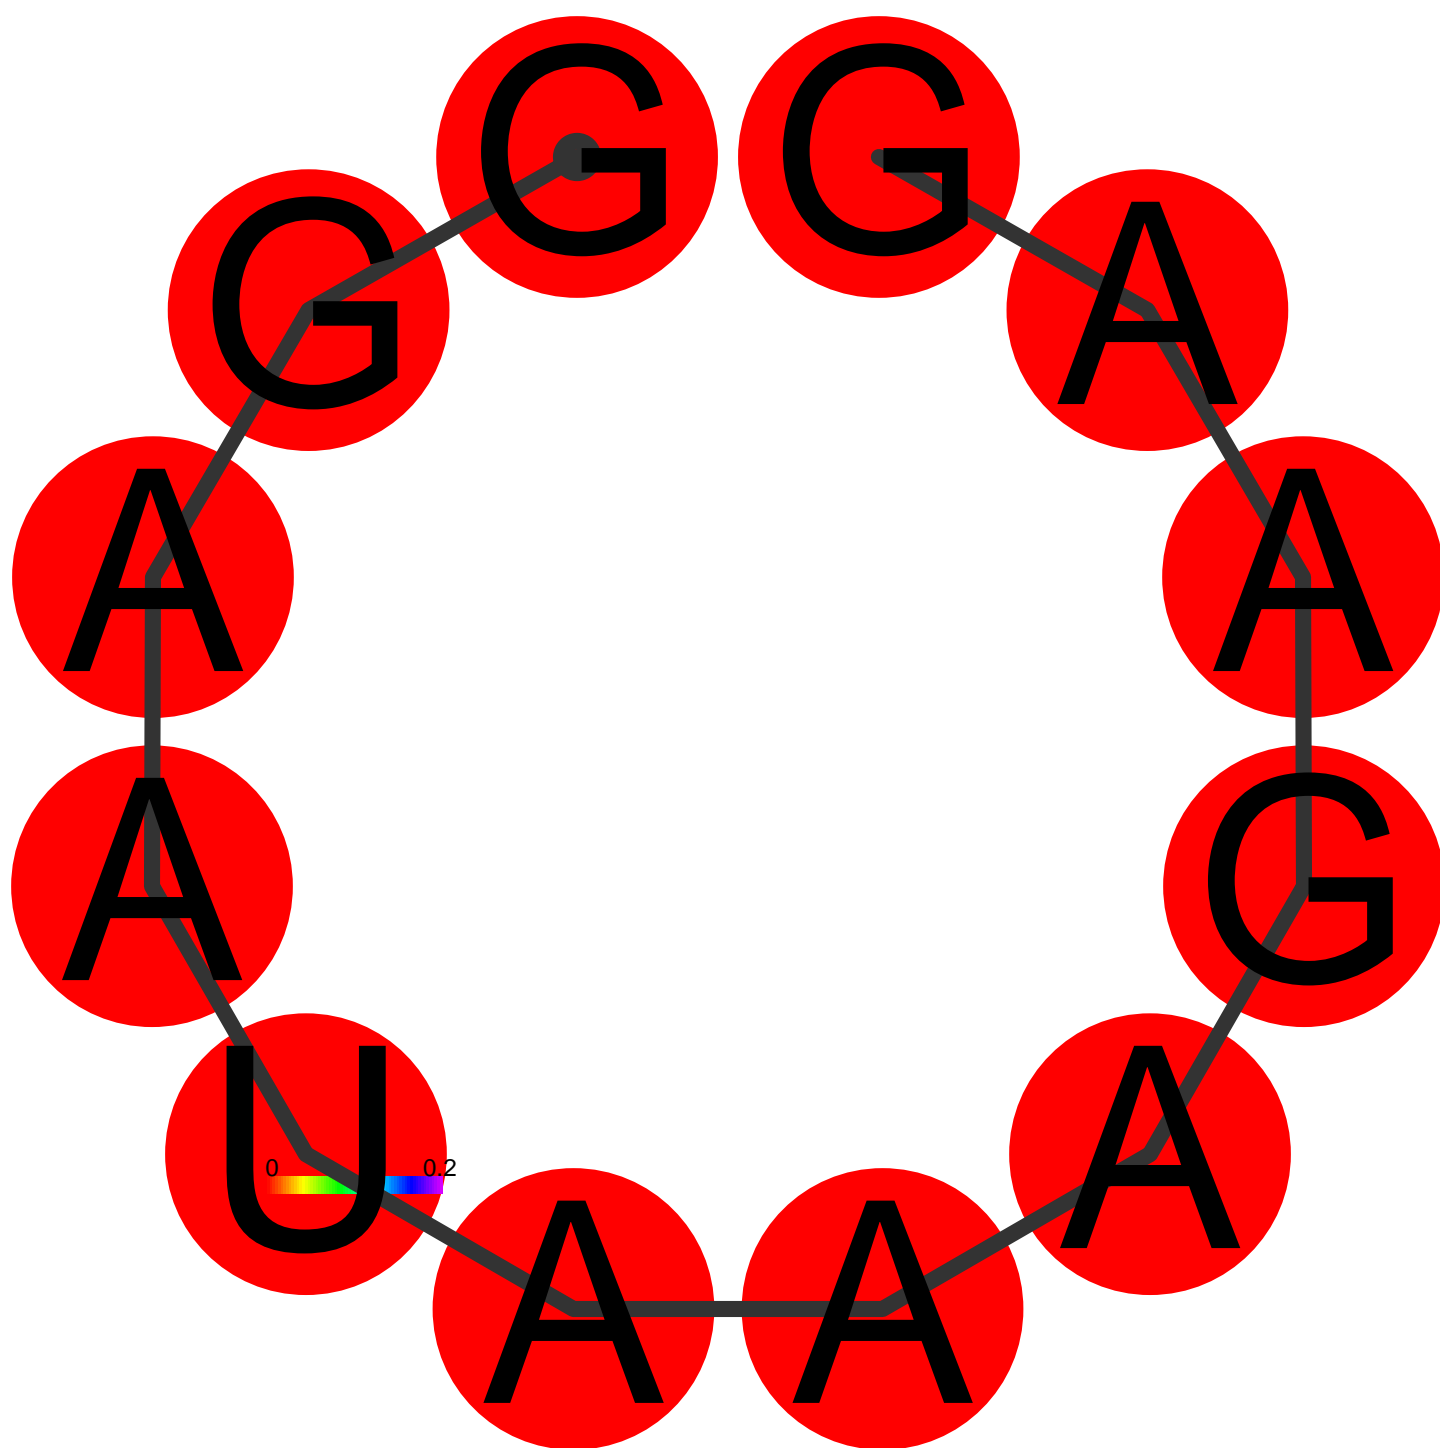

Supplement: Supplementary file 140 [file supplementary]

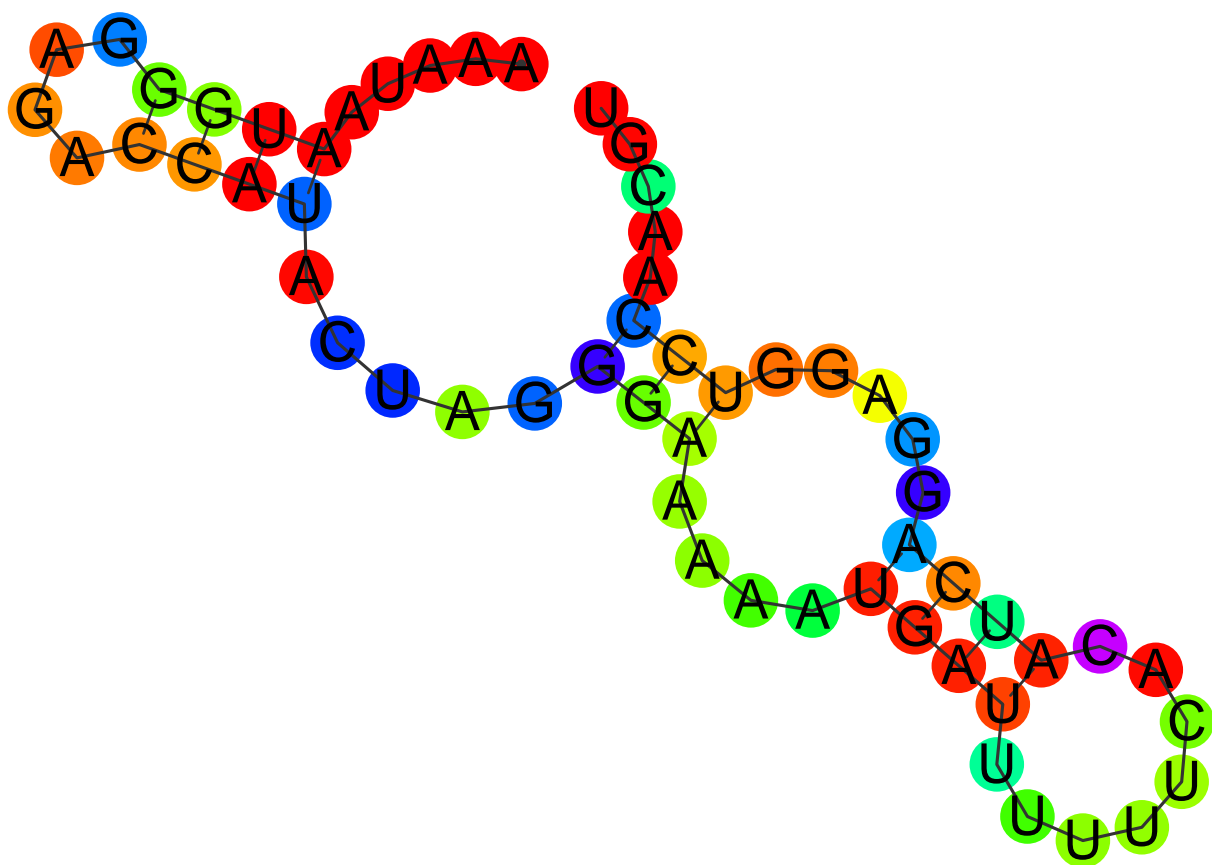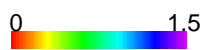

Supplement: Supplementary file 141 [file supplementary]

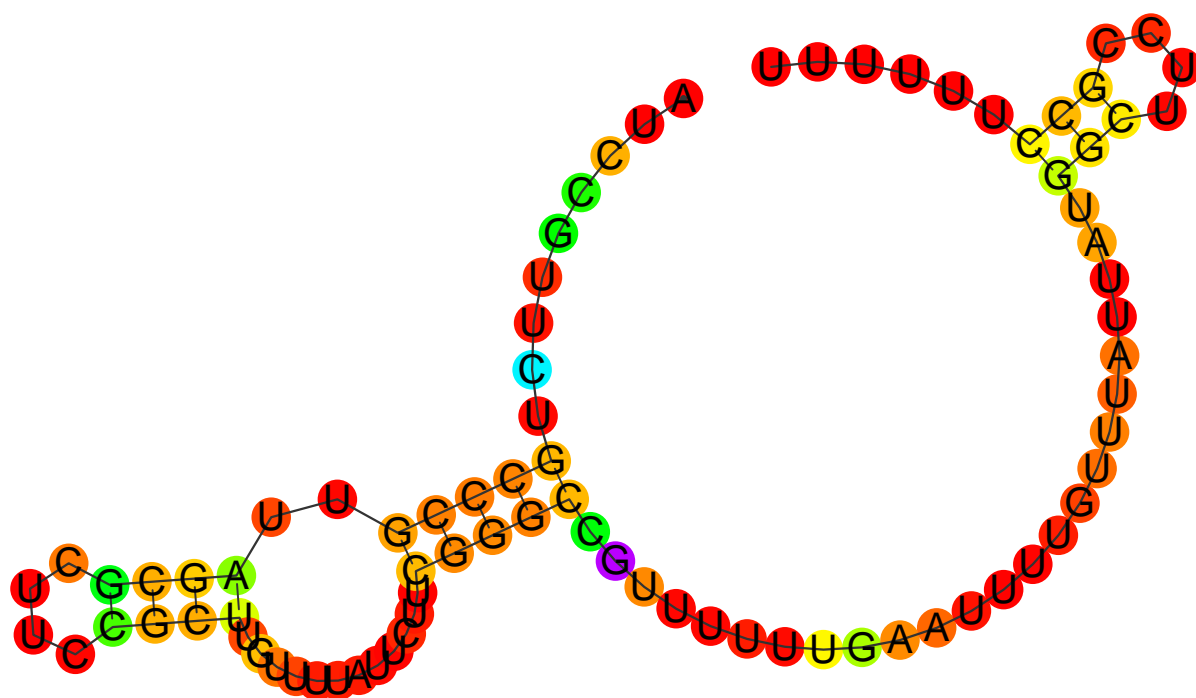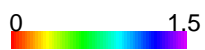

Supplement: Supplementary file 142 [file supplementary]

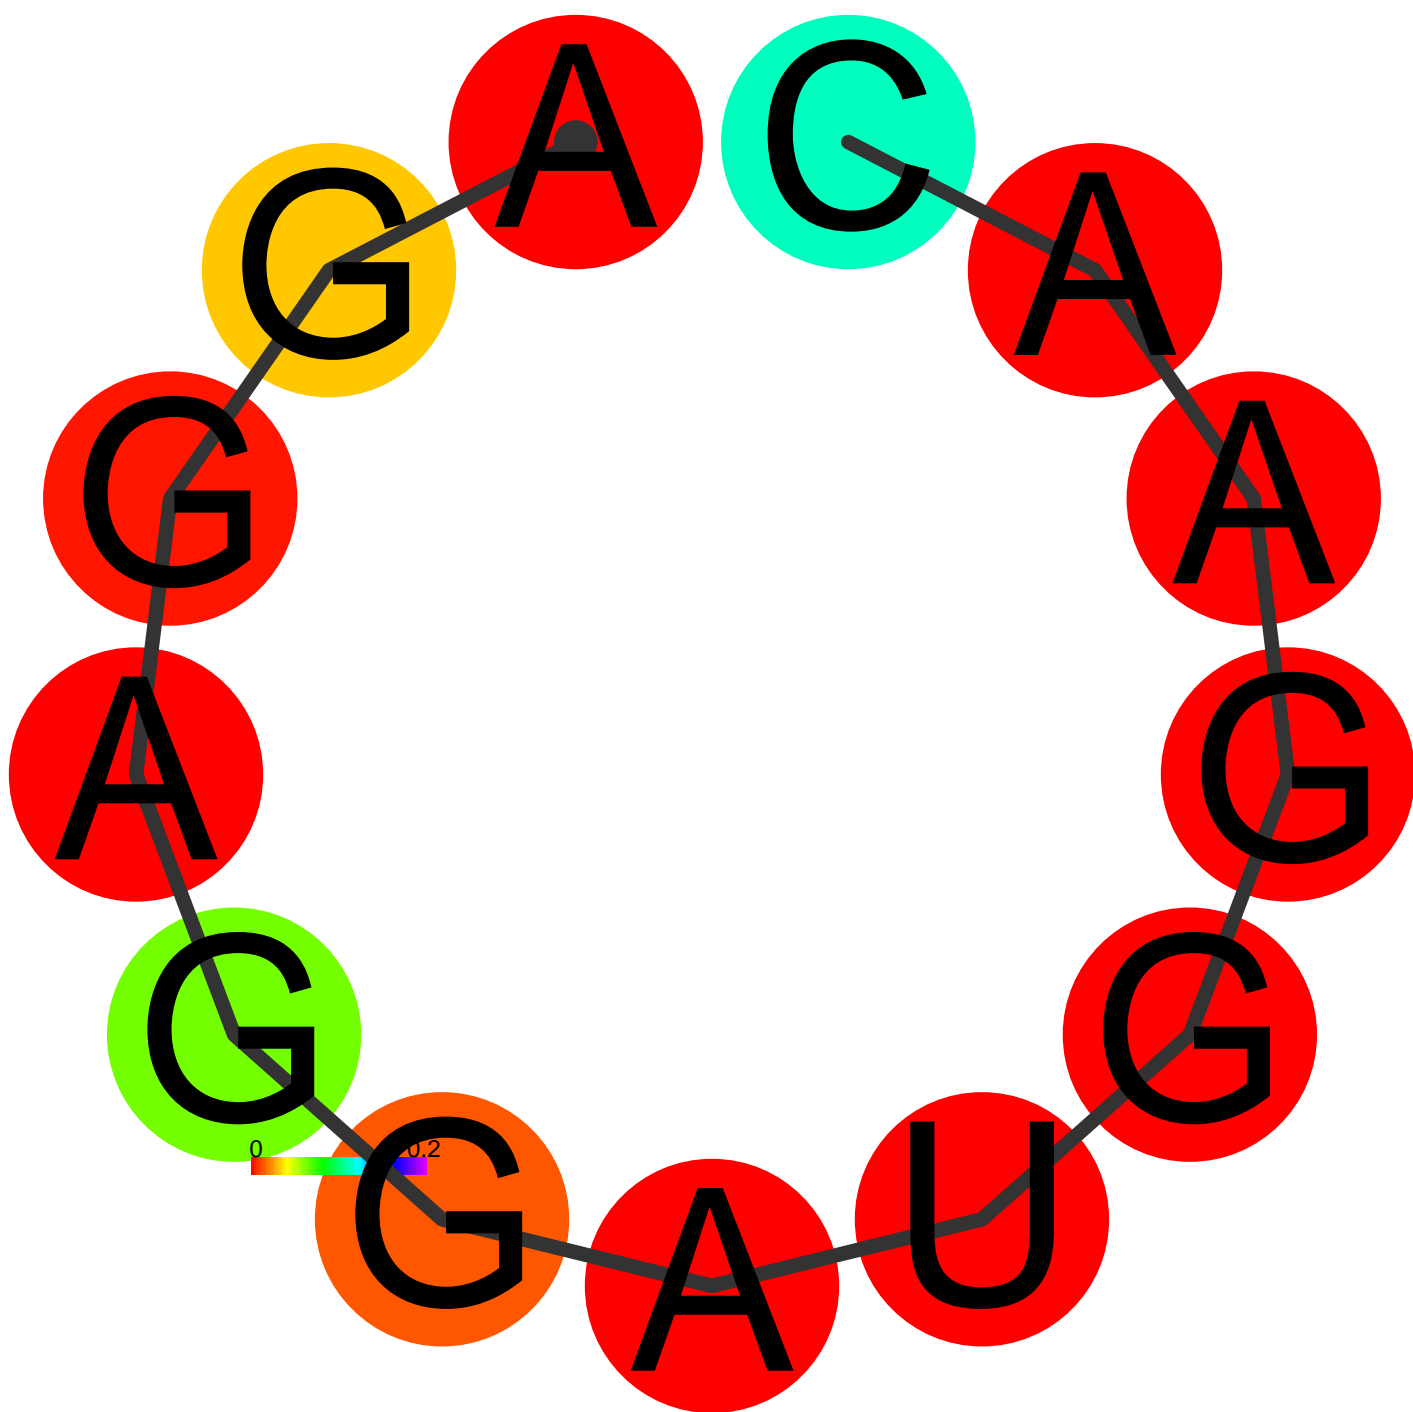

Supplement: Supplementary file 143 [file supplementary]

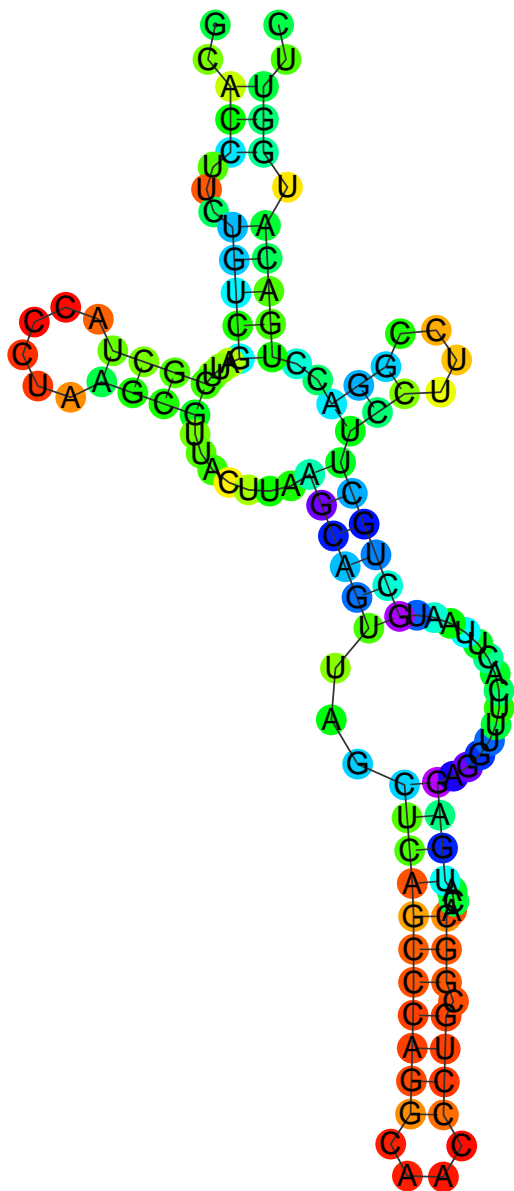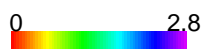

Supplement: Supplementary file 144 [file supplementary]

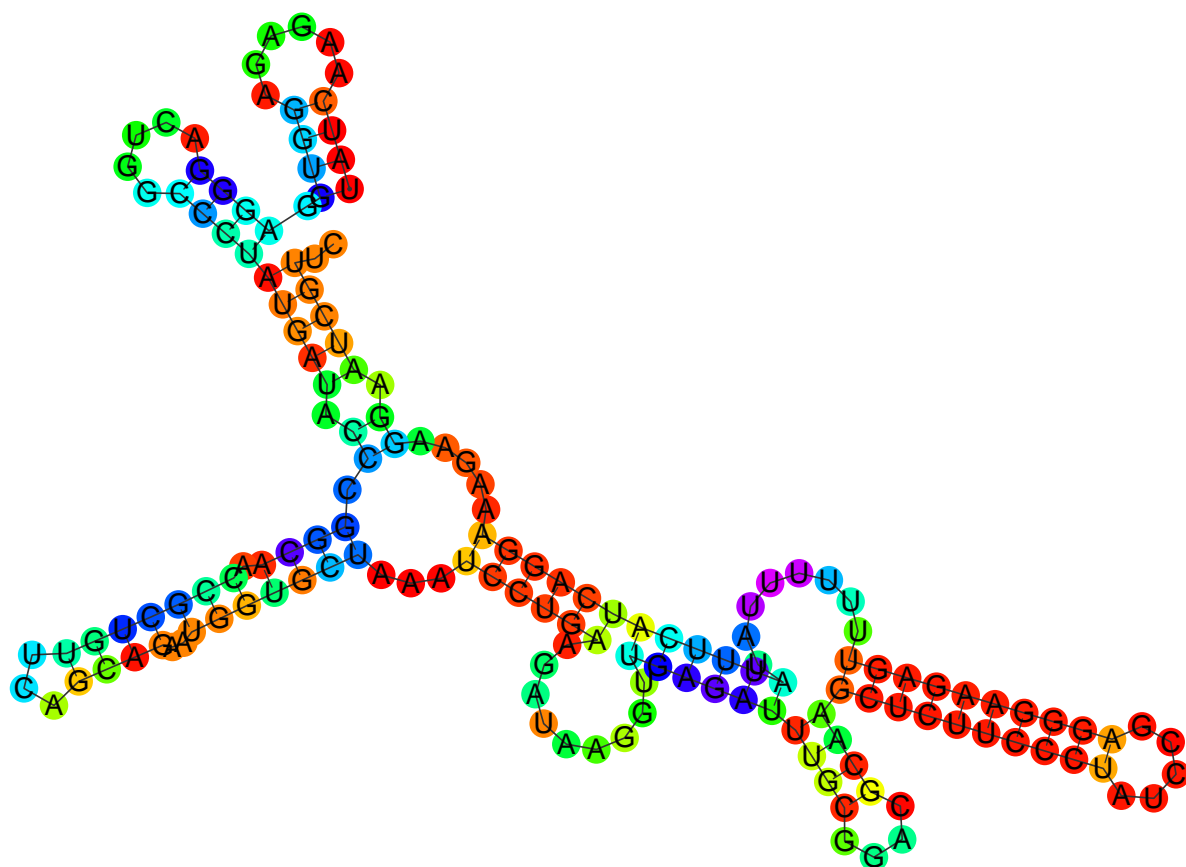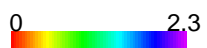

Supplement: Supplementary file 145 [file supplementary]

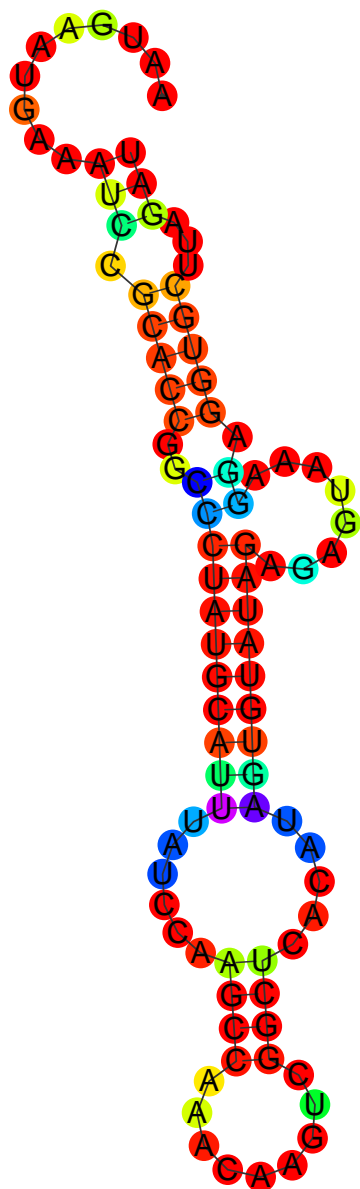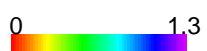

Supplement: Supplementary file 146 [file supplementary]

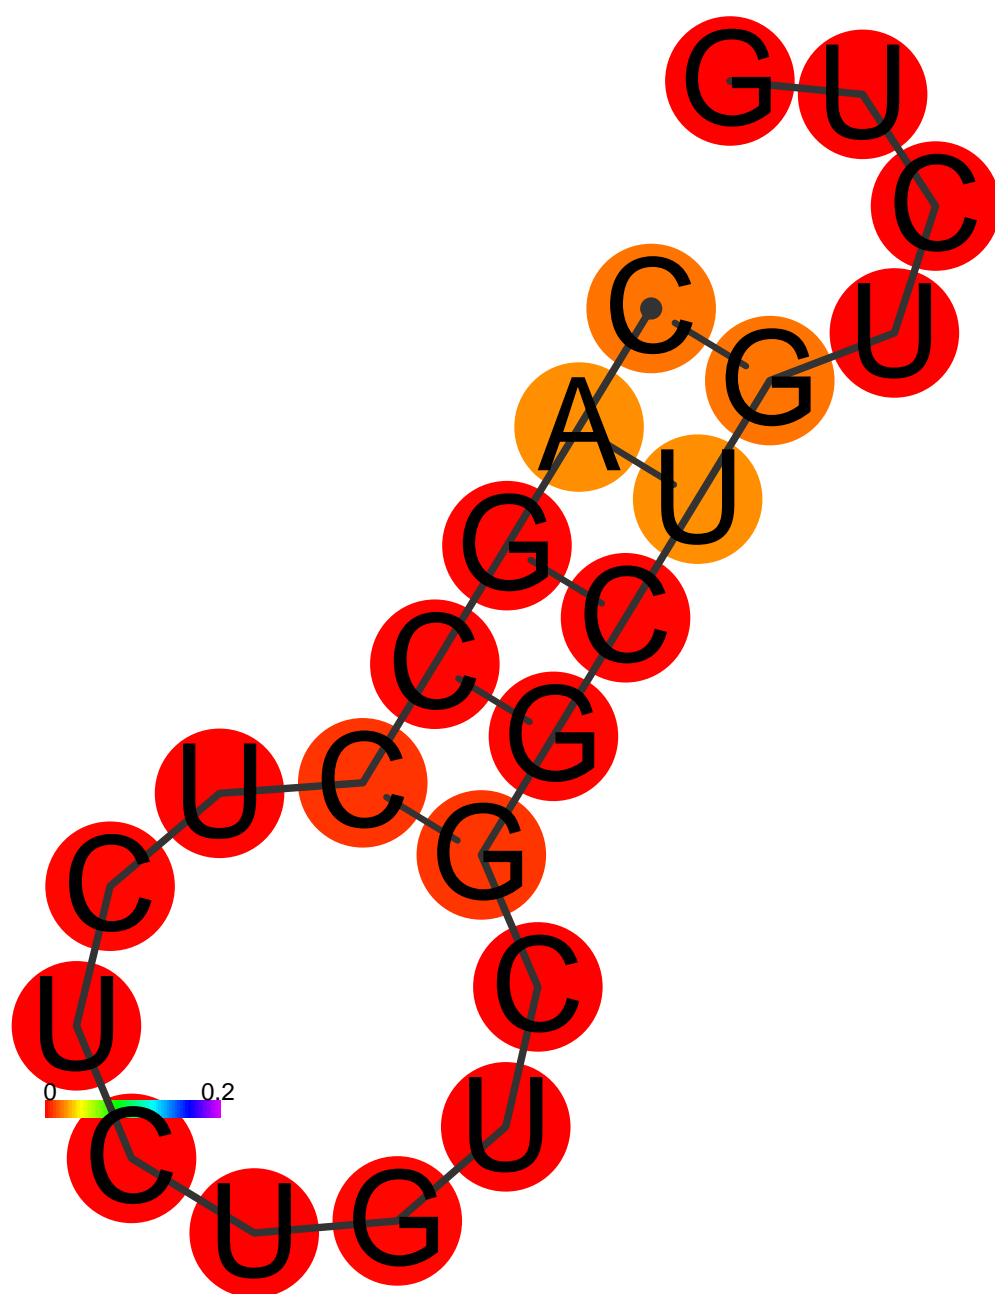

Supplement: Supplementary file 147 [file supplementary]

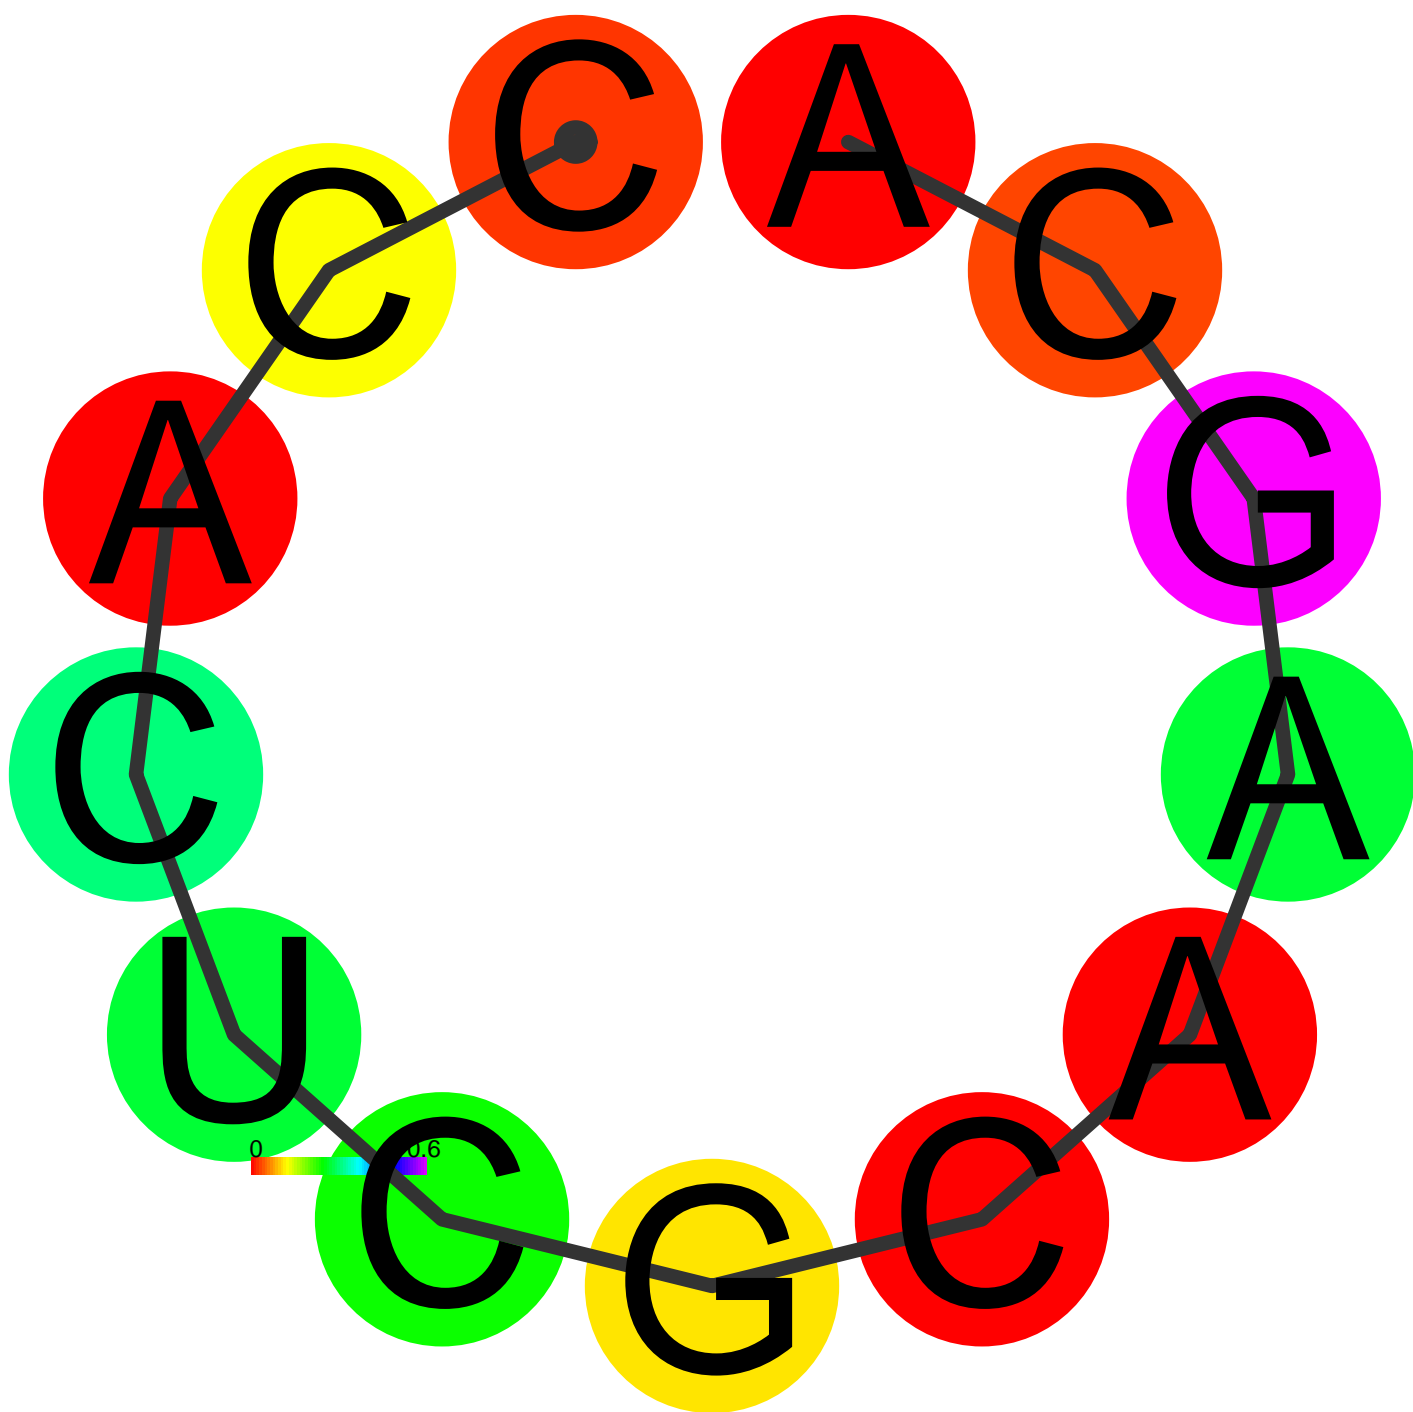

Supplement: Supplementary file 148 [file supplementary]

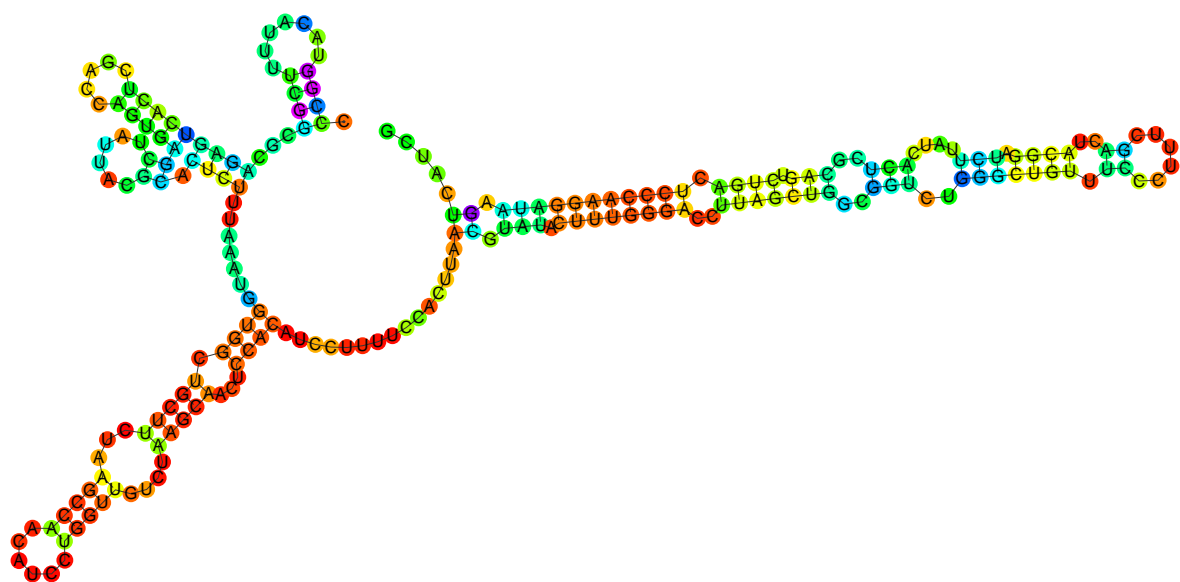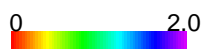

Supplement: Supplementary file 149 [file supplementary]

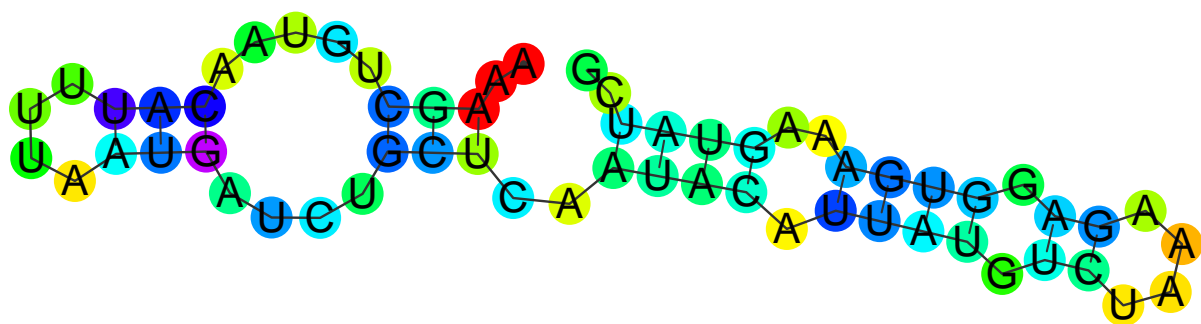

Supplement: Supplementary file 150 [file supplementary]

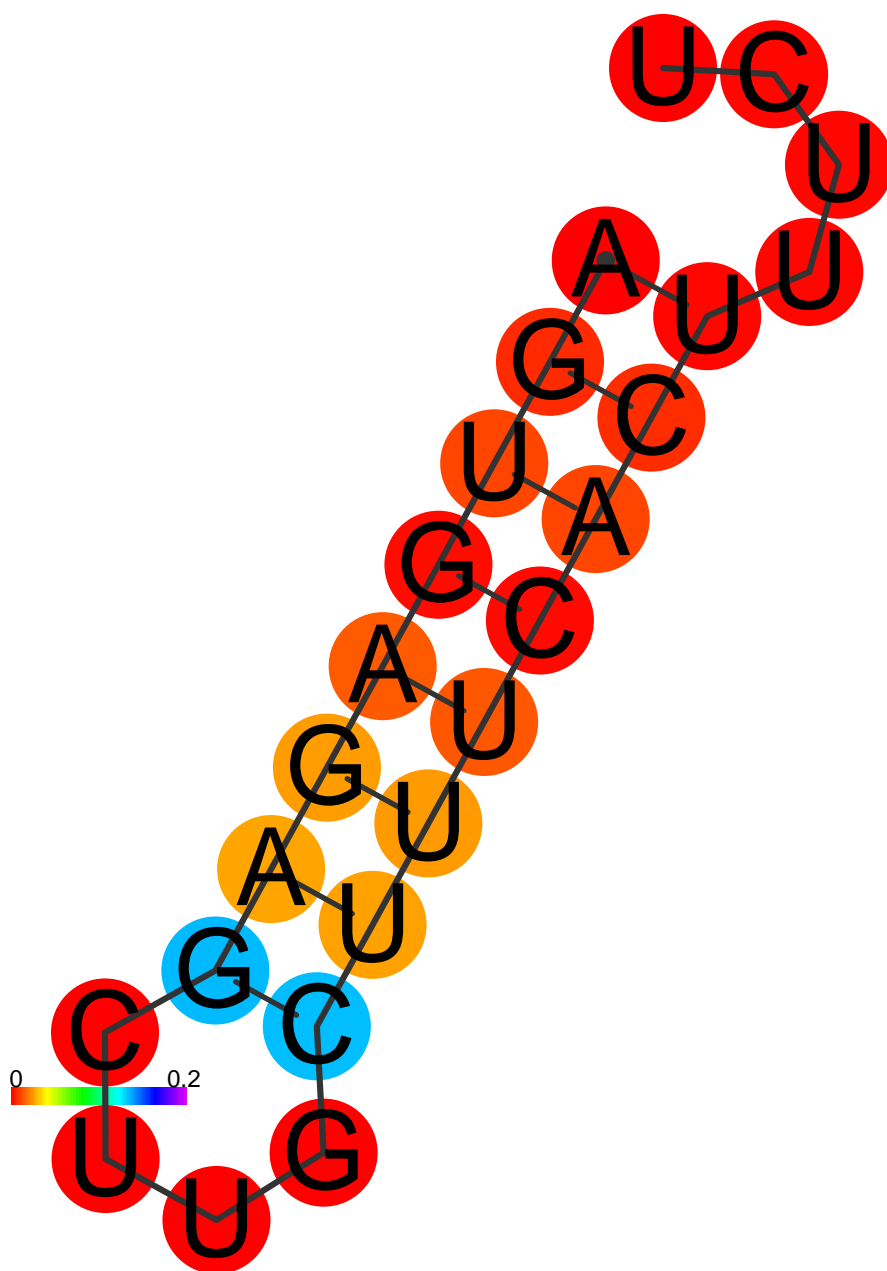

Supplement: Supplementary file 151 [file supplementary]

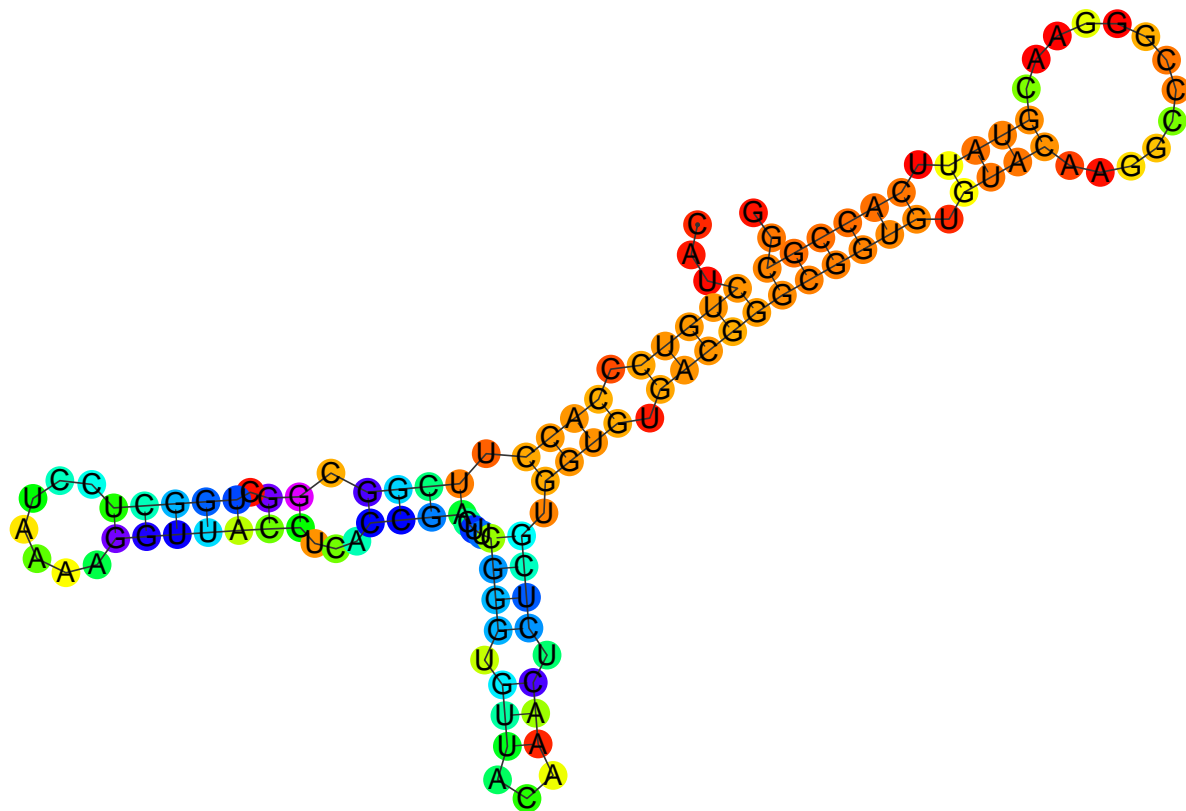

Supplement: Supplementary file 152 [file supplementary]

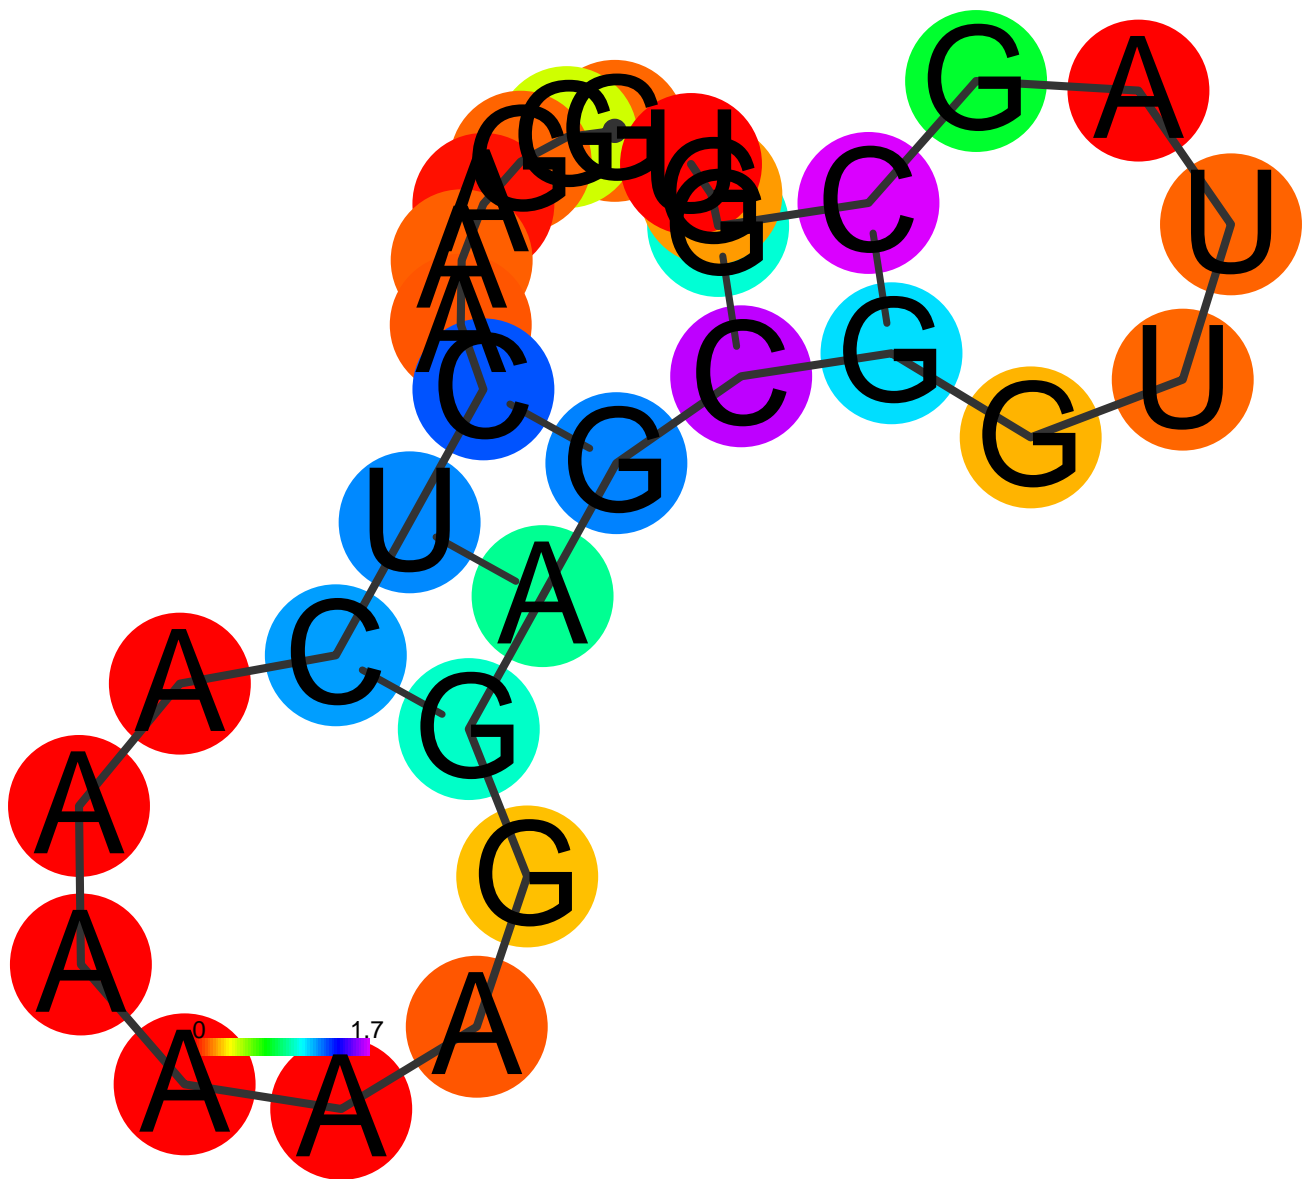

Supplement: Supplementary file 153 [file supplementary]

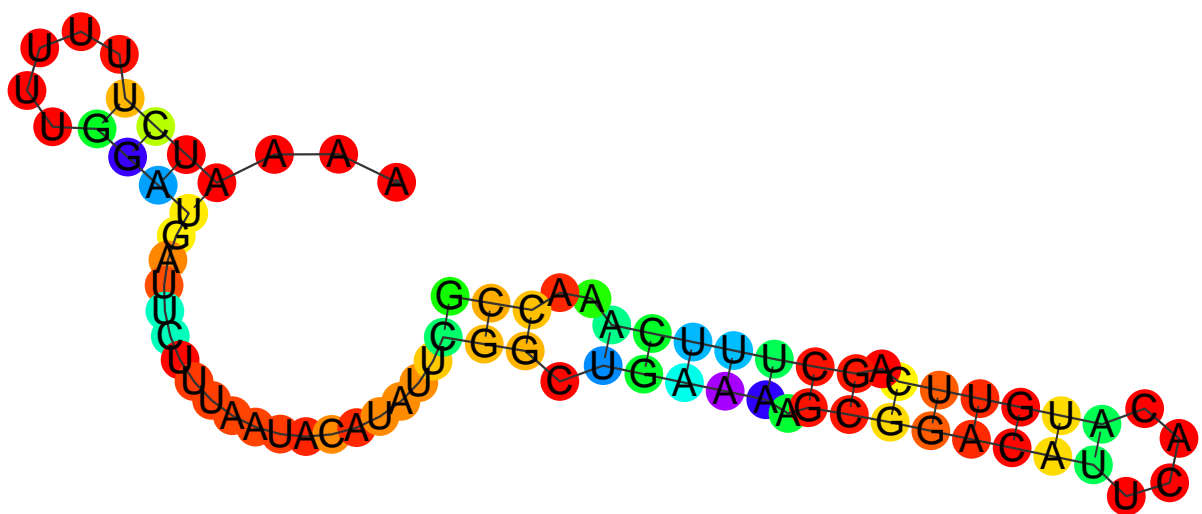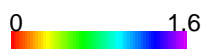

Supplement: Supplementary file 154 [file supplementary]

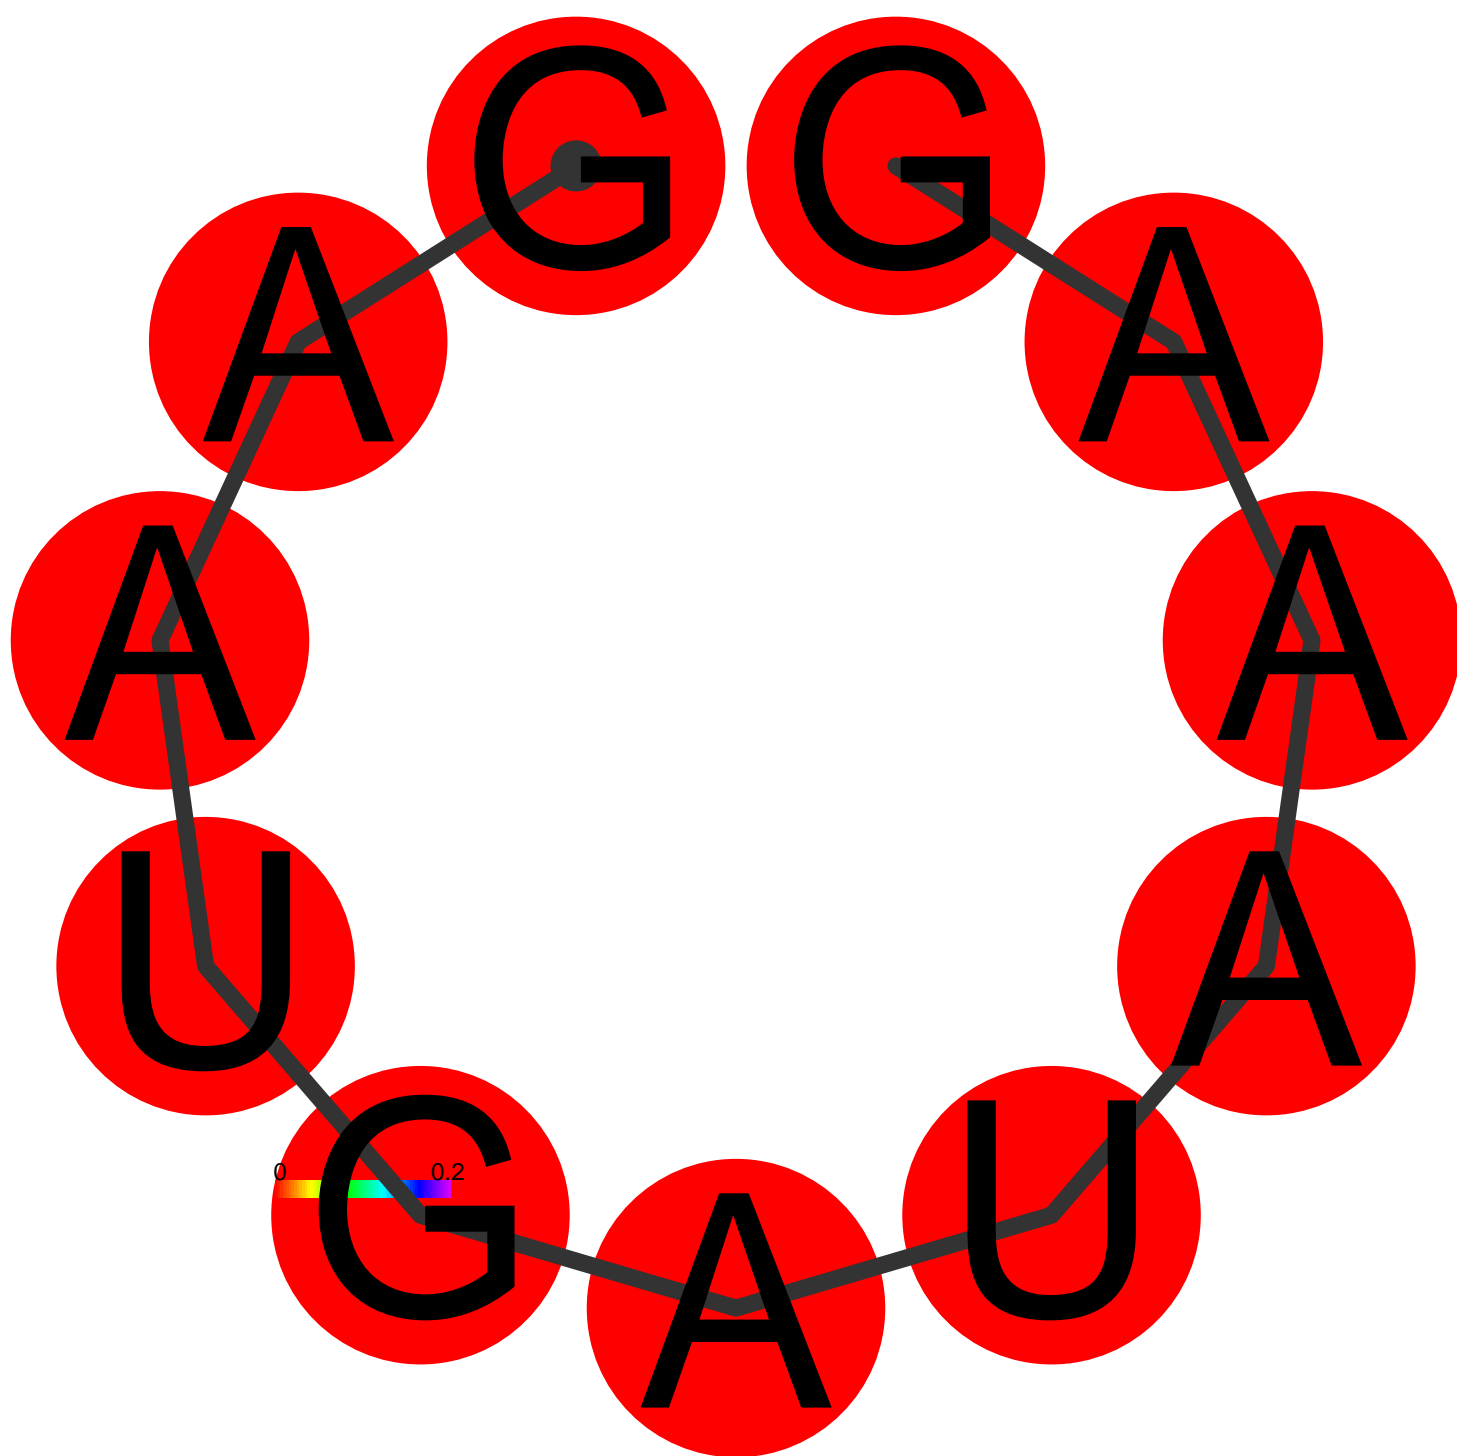

Supplement: Supplementary file 155 [file supplementary]

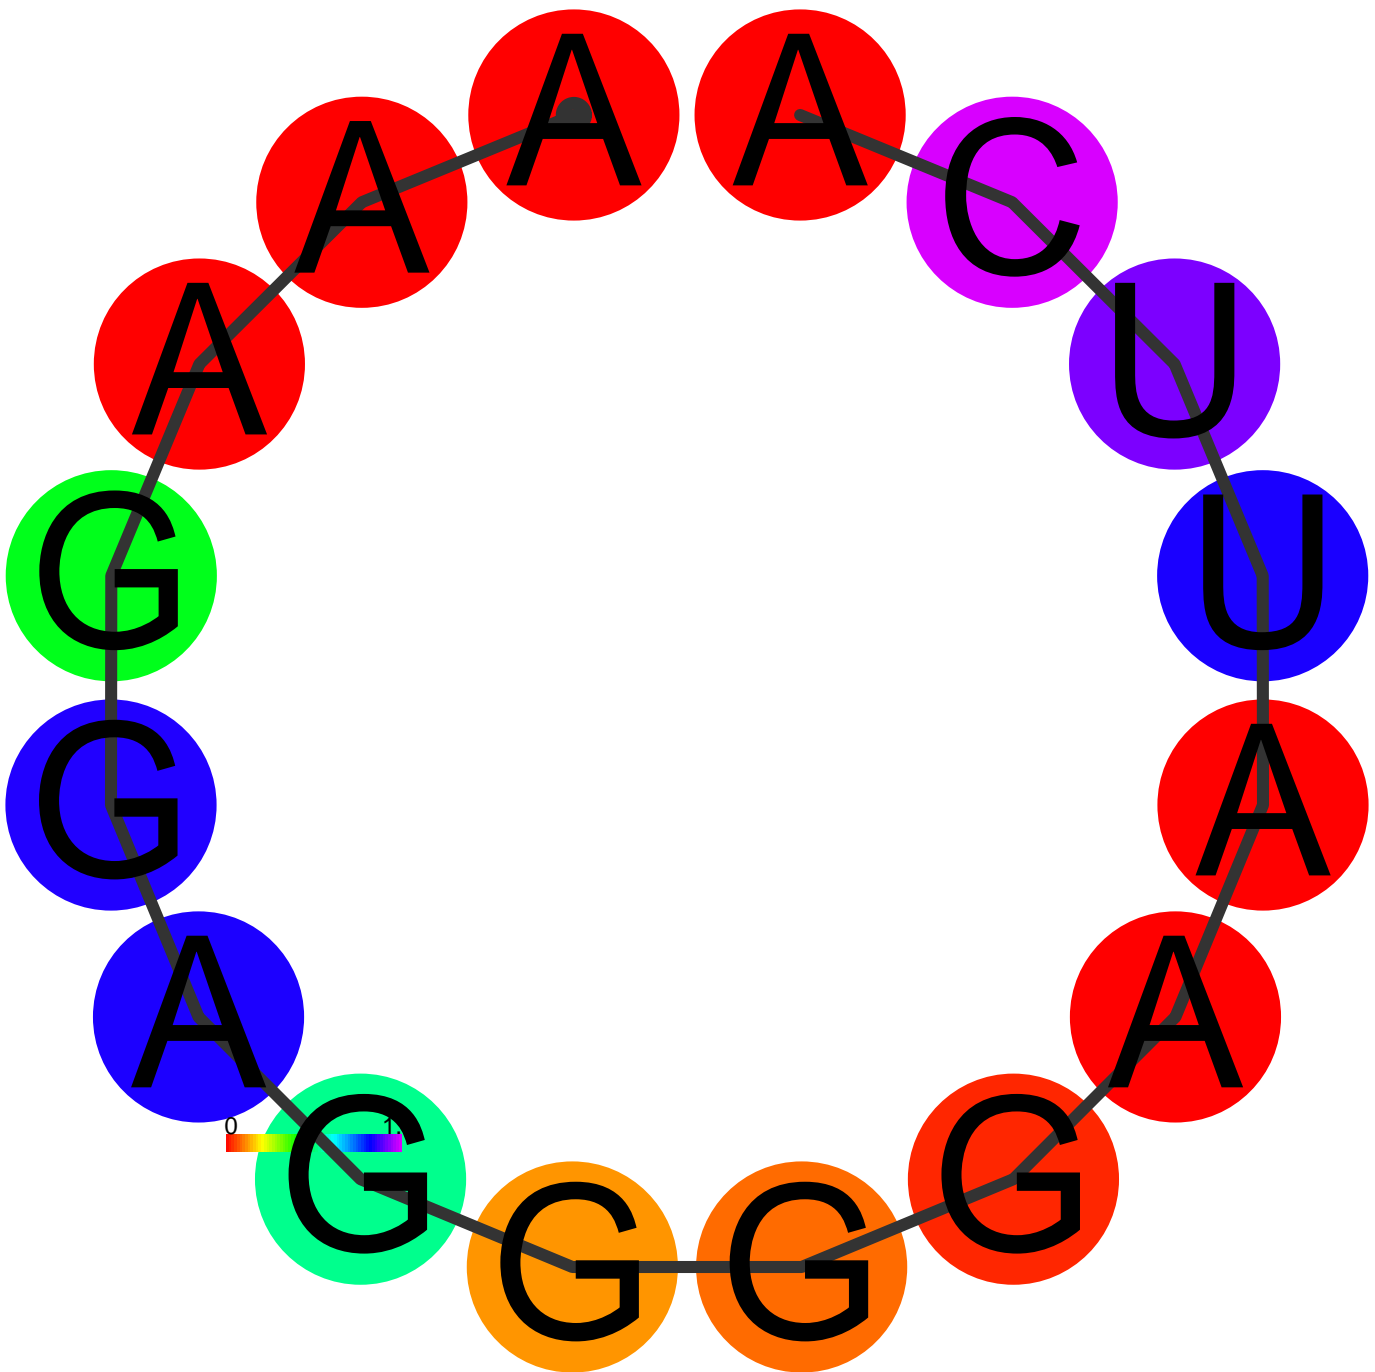

Supplement: Supplementary file 156 [file supplementary]

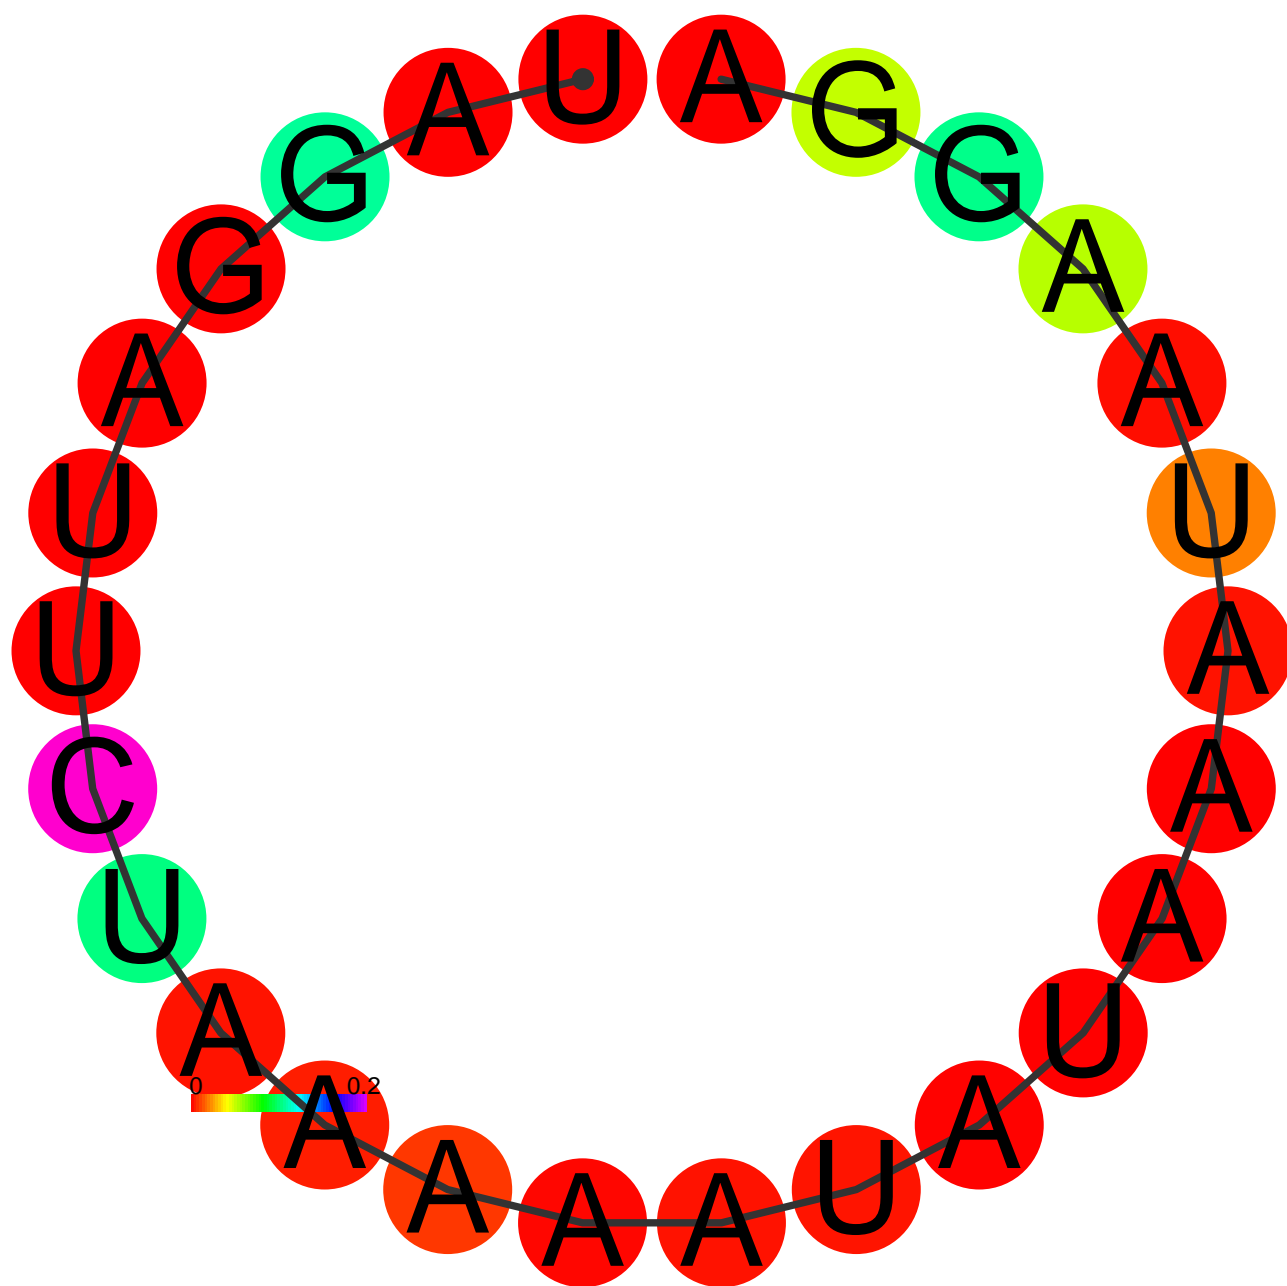

Supplement: Supplementary file 157 [file supplementary]

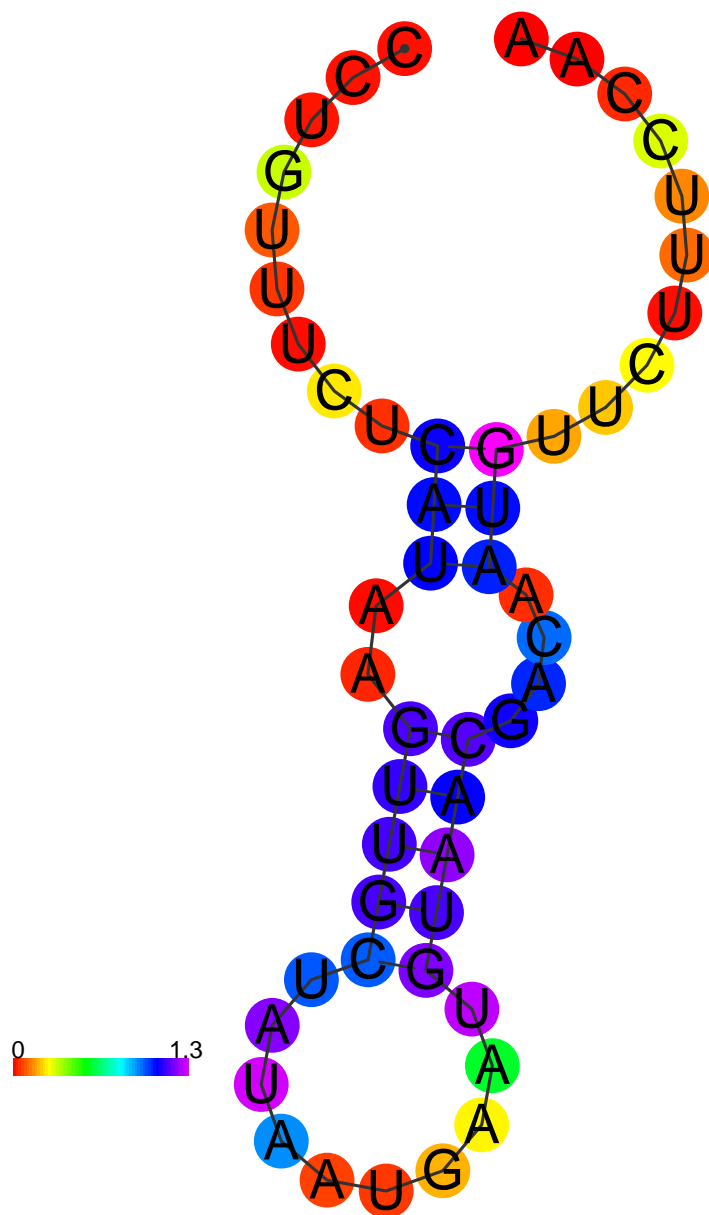

Supplement: Supplementary file 158 [file supplementary]

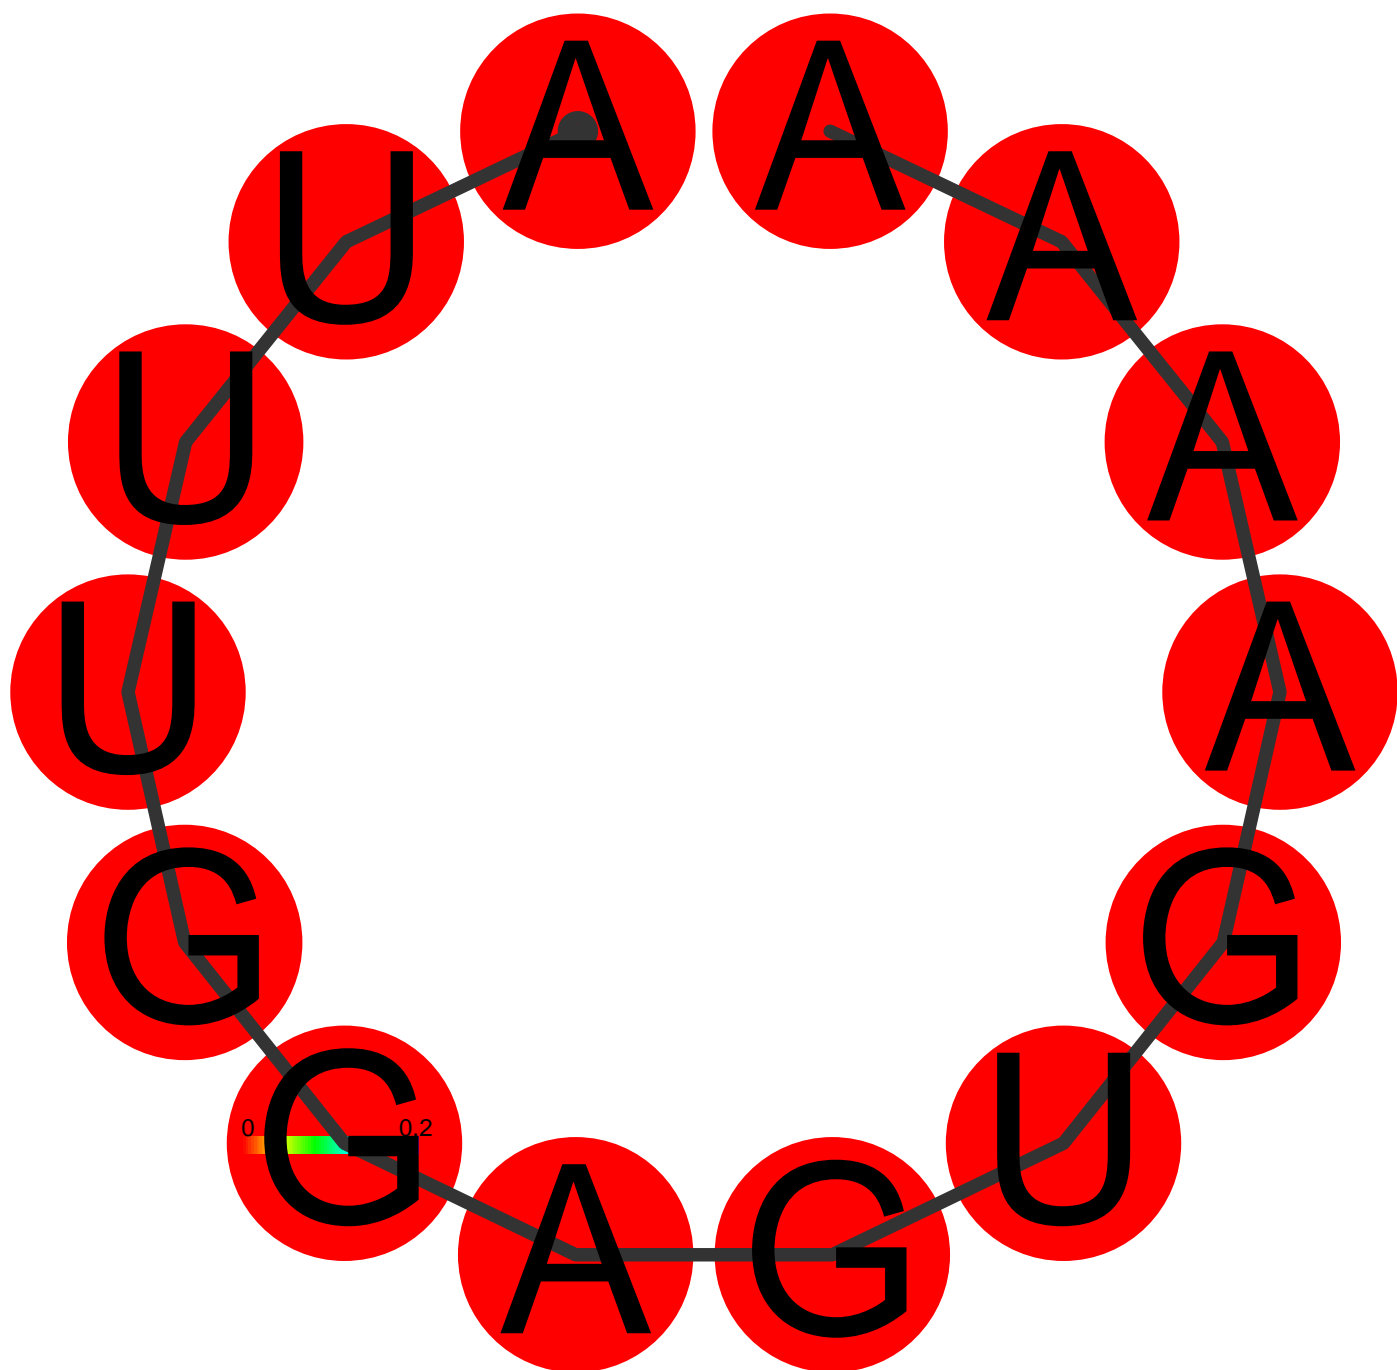

Supplement: Supplementary file 159 [file supplementary]

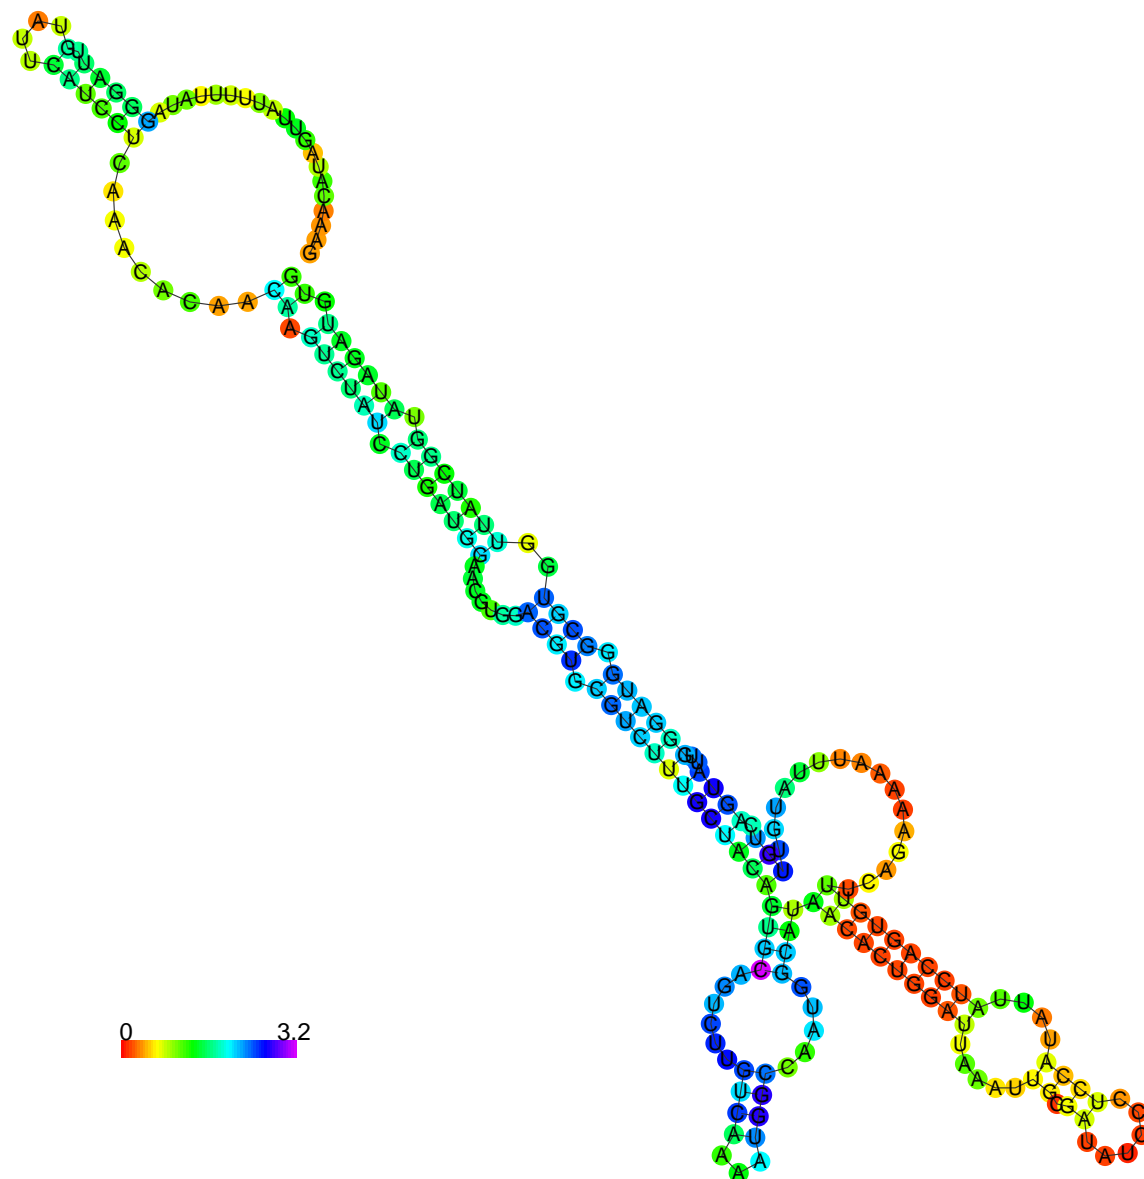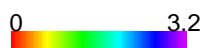

Supplement: Supplementary file 160 [file supplementary]

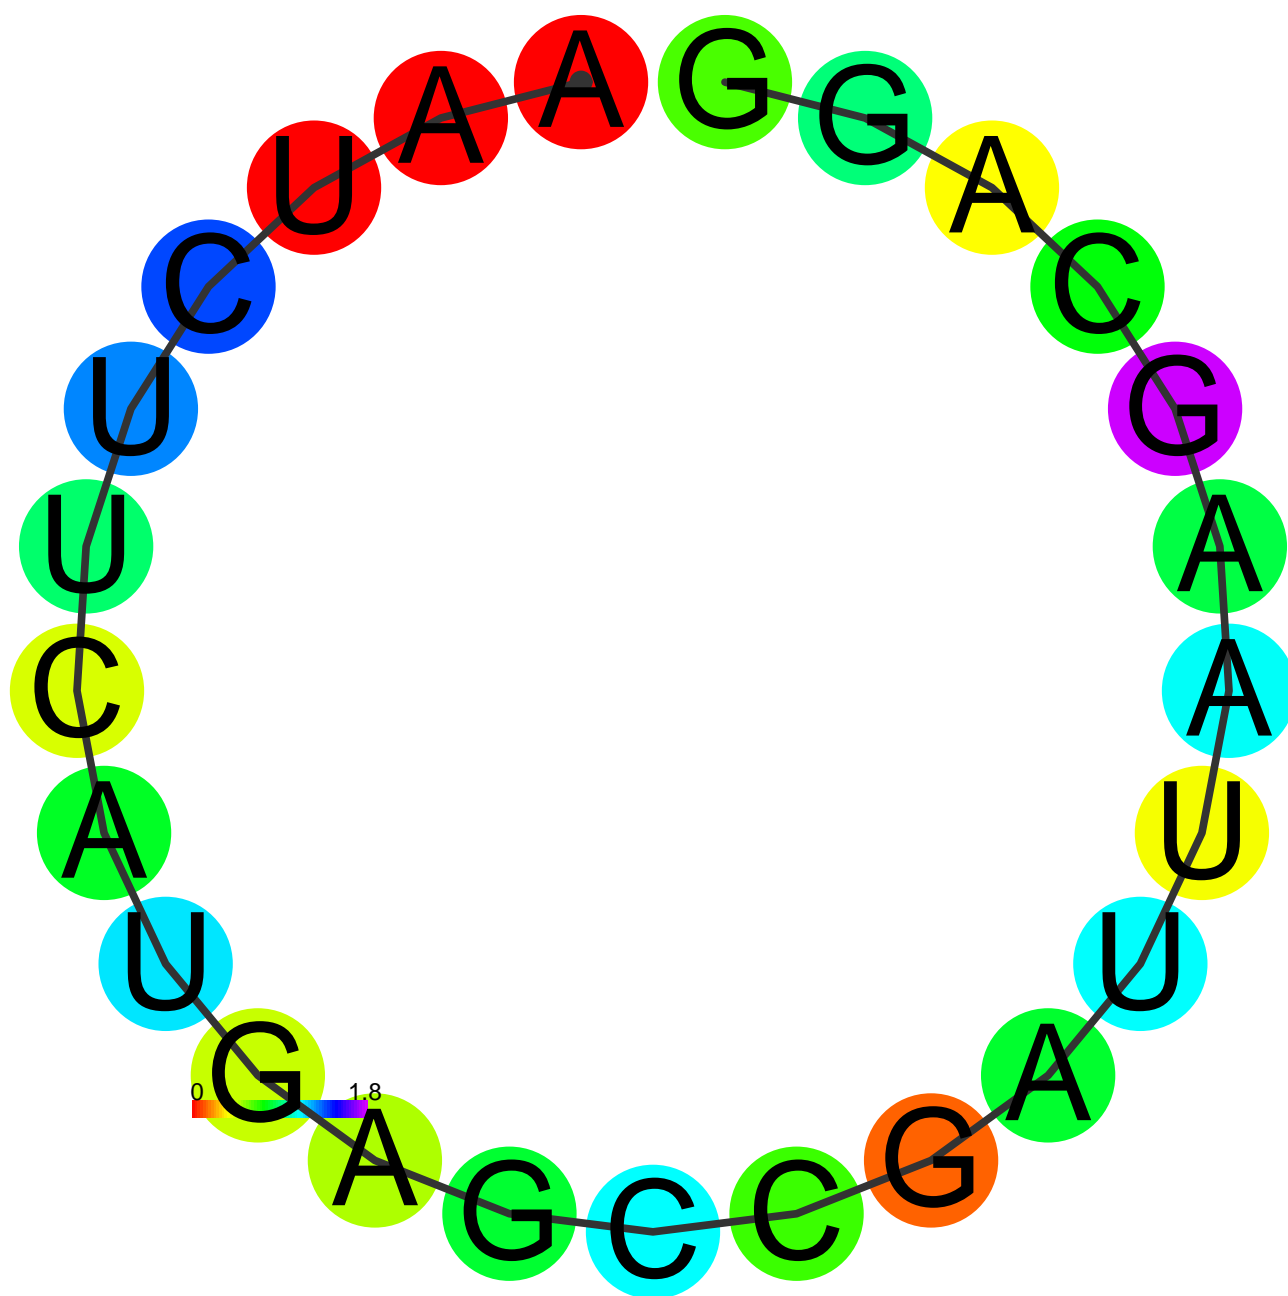

Supplement: Supplementary file 161 [file supplementary]

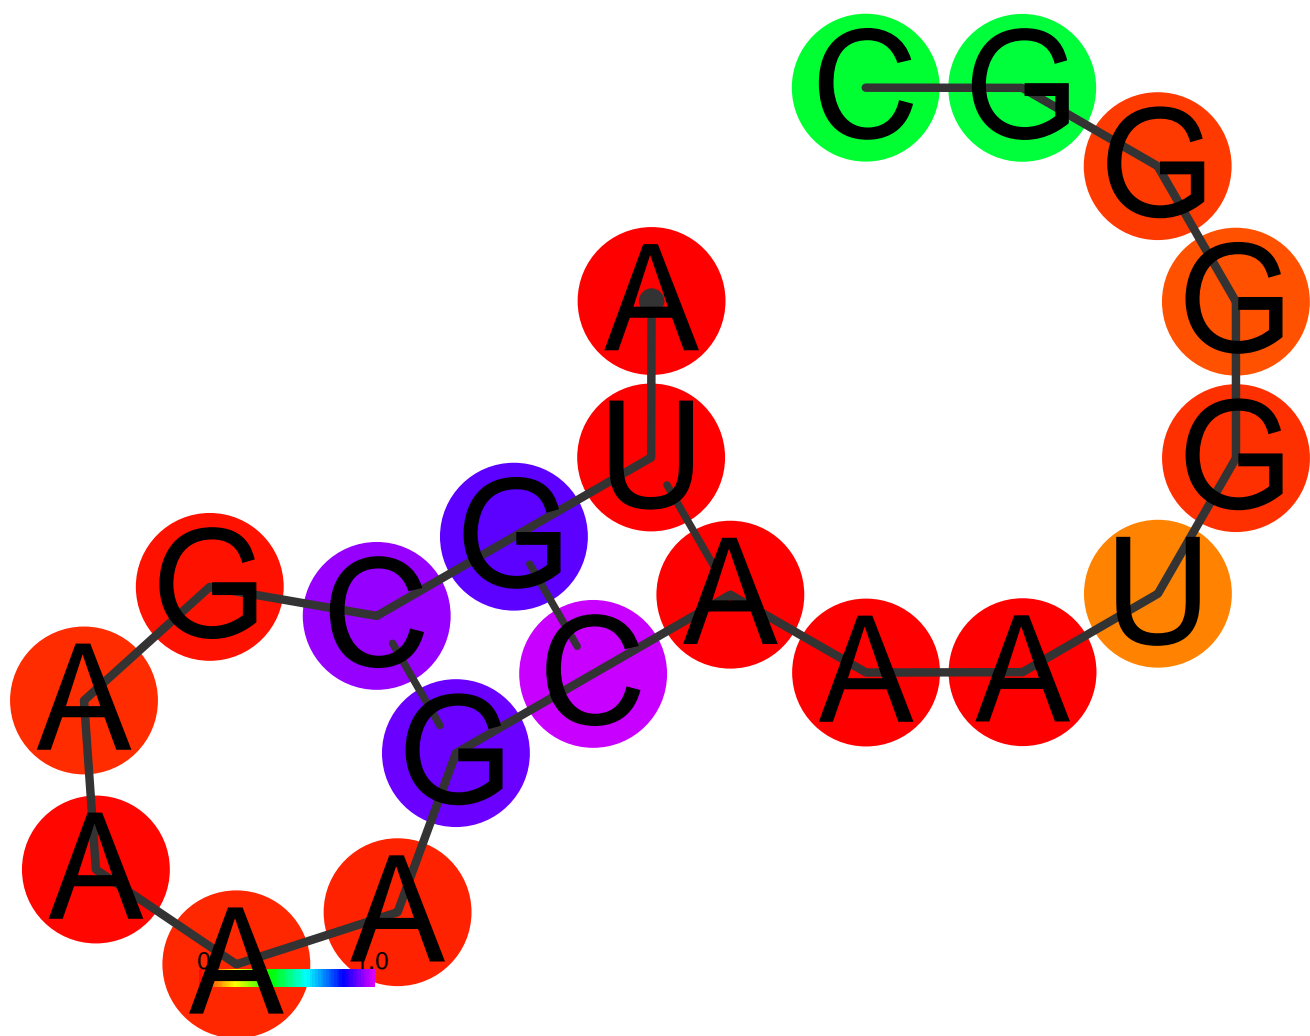

Supplement: Supplementary file 162 [file supplementary]

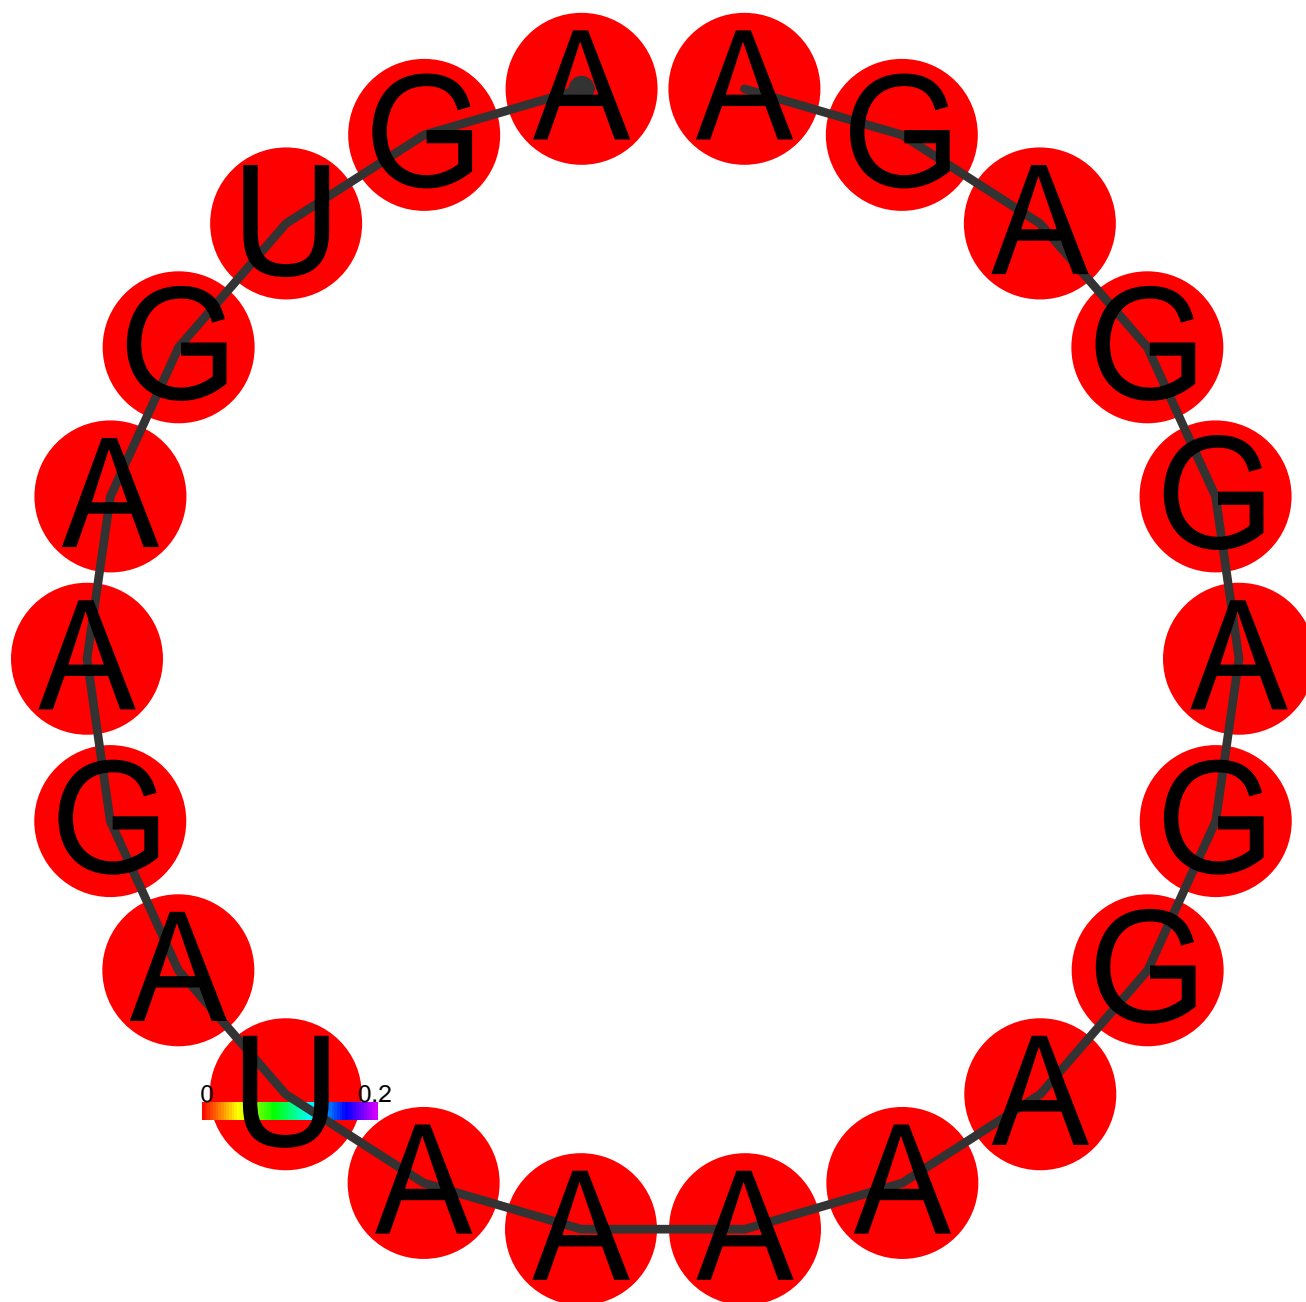

Supplement: Supplementary file 163 [file supplementary]

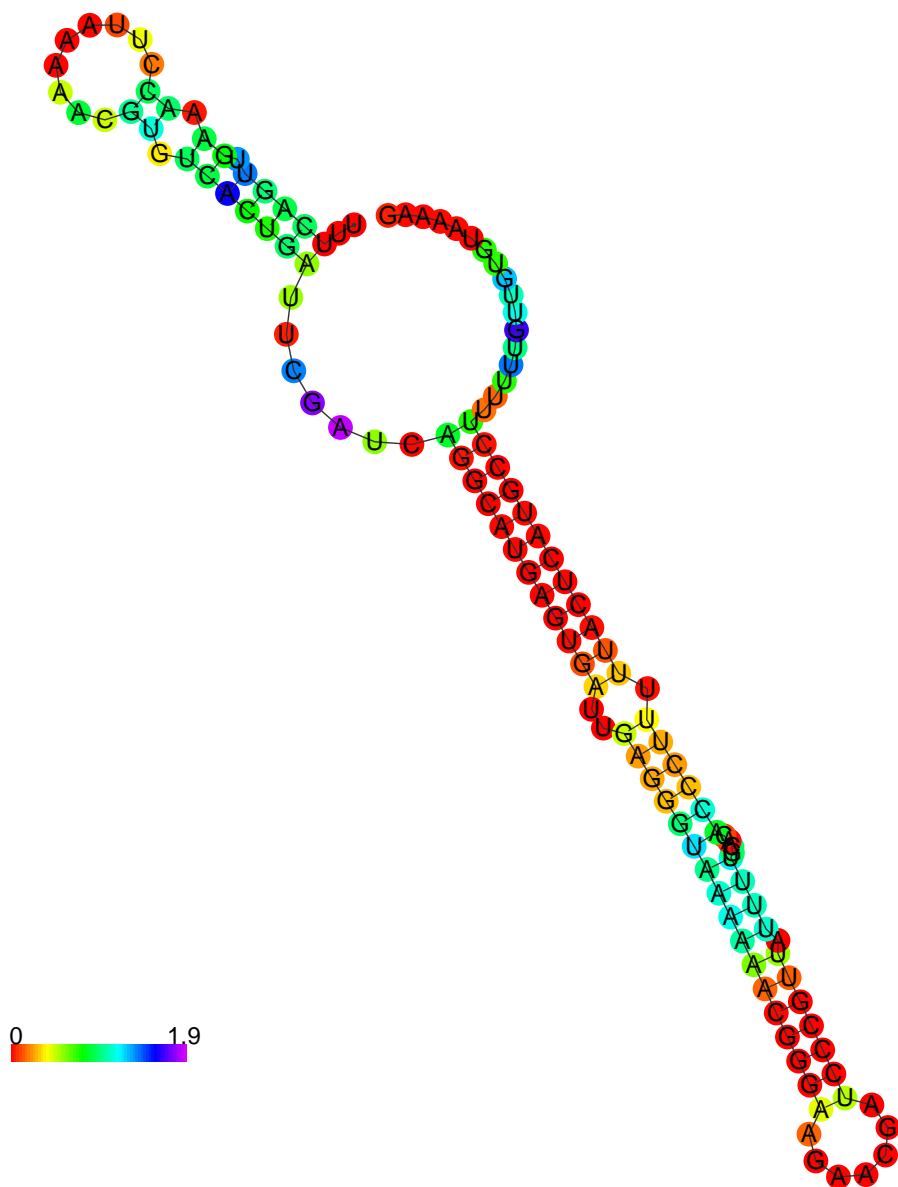

Supplement: Supplementary file 164 [file supplementary]

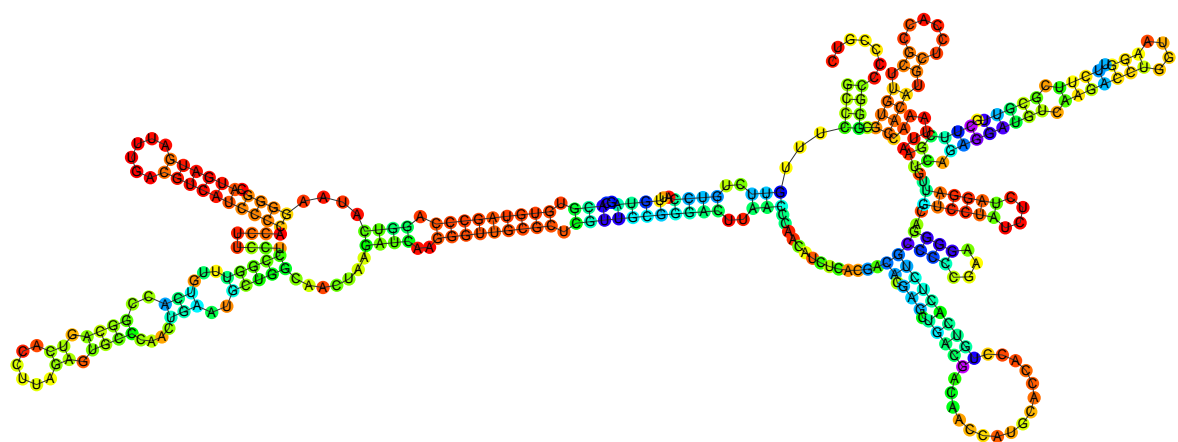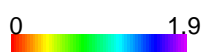

Supplement: Supplementary file 165 [file supplementary]

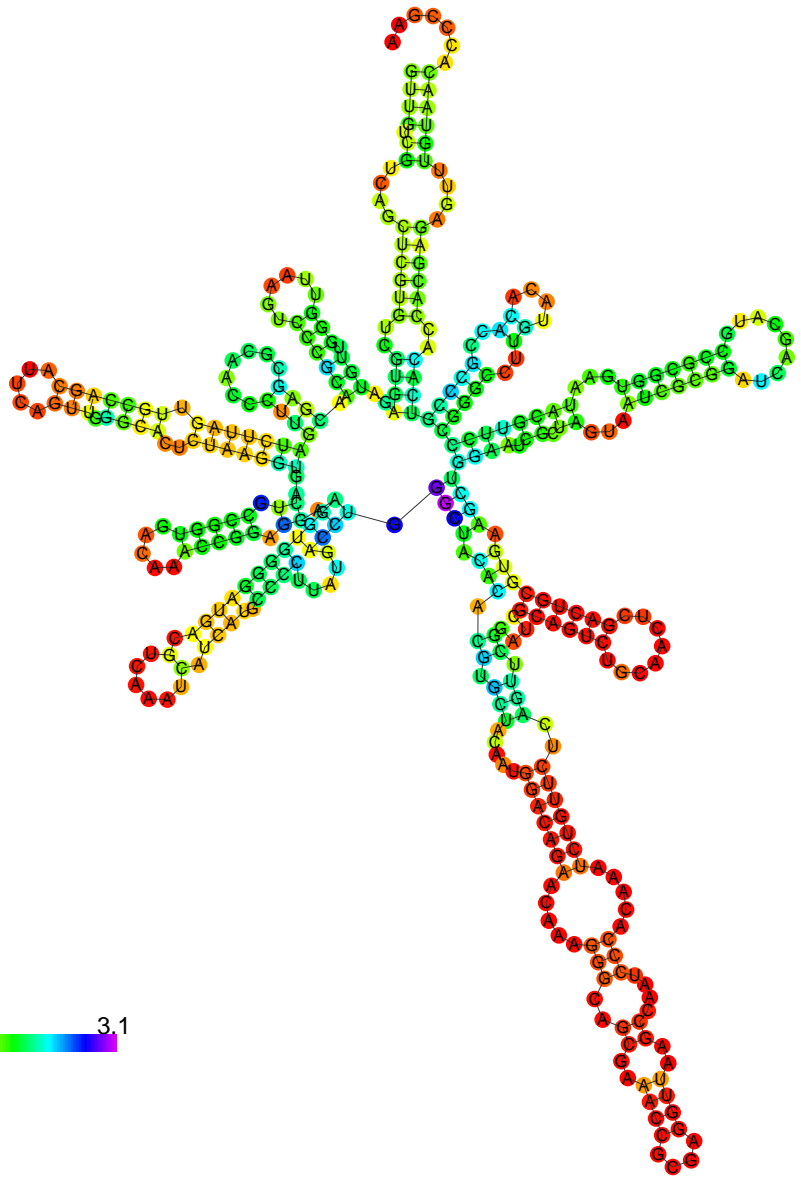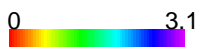

Supplement: Supplementary file 166 [file supplementary]

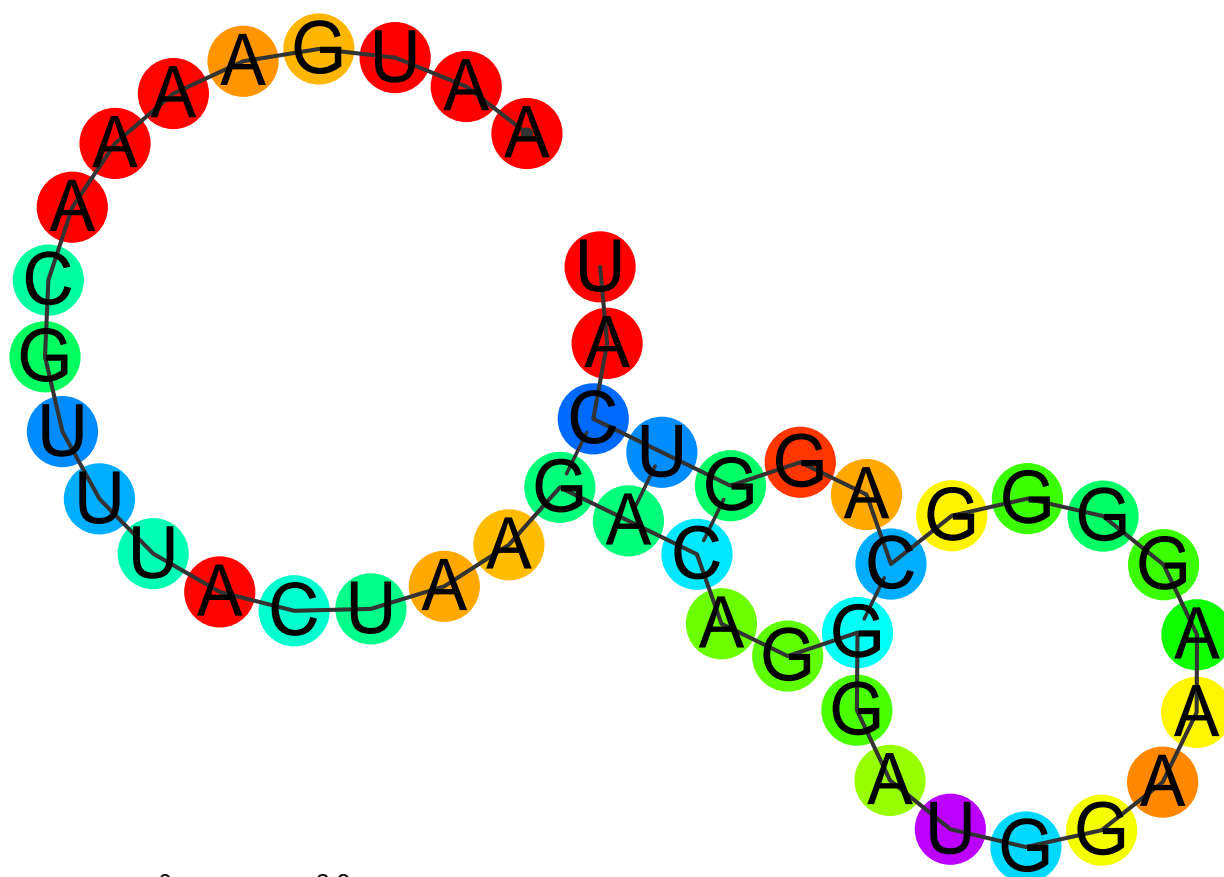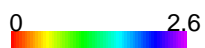

Supplement: Supplementary file 167 [file supplementary]

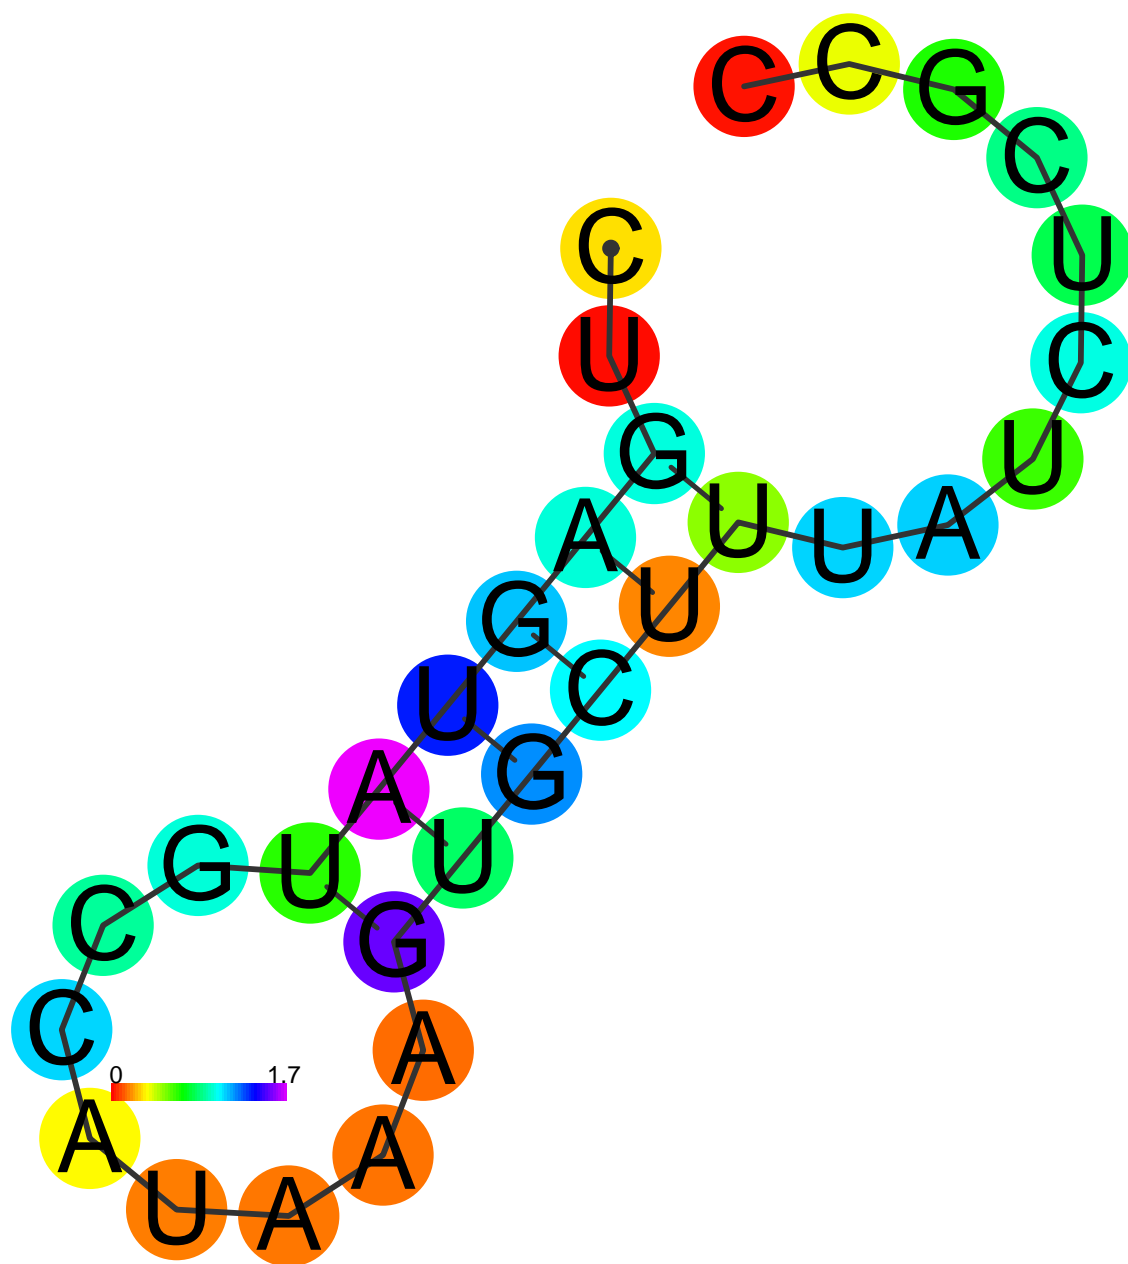

Supplement: Supplementary file 168 [file supplementary]

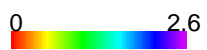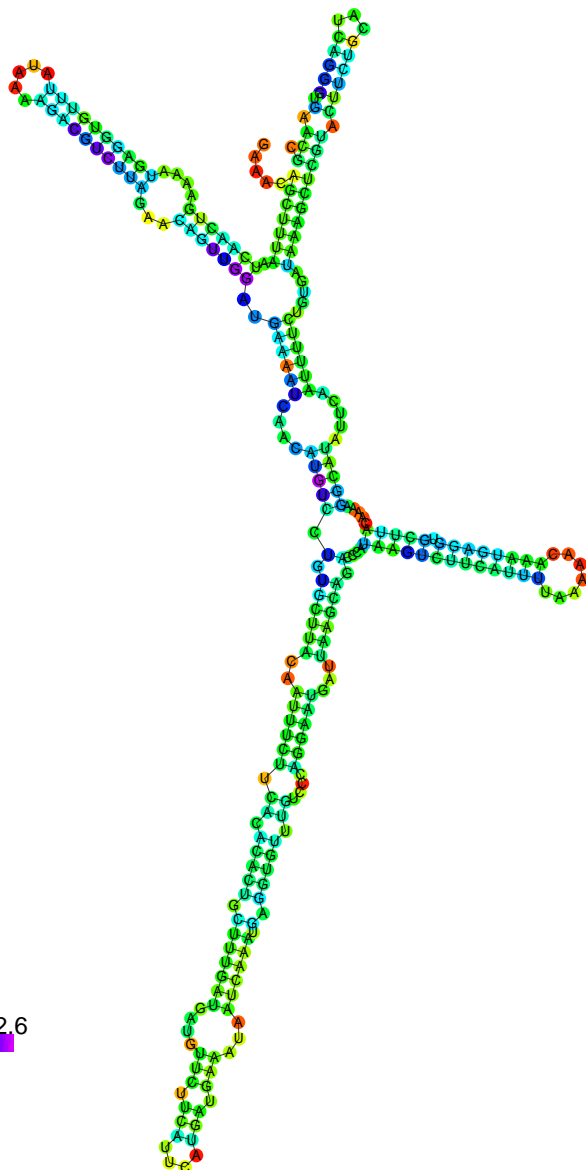

Supplement: Supplementary file 169 [file supplementary]

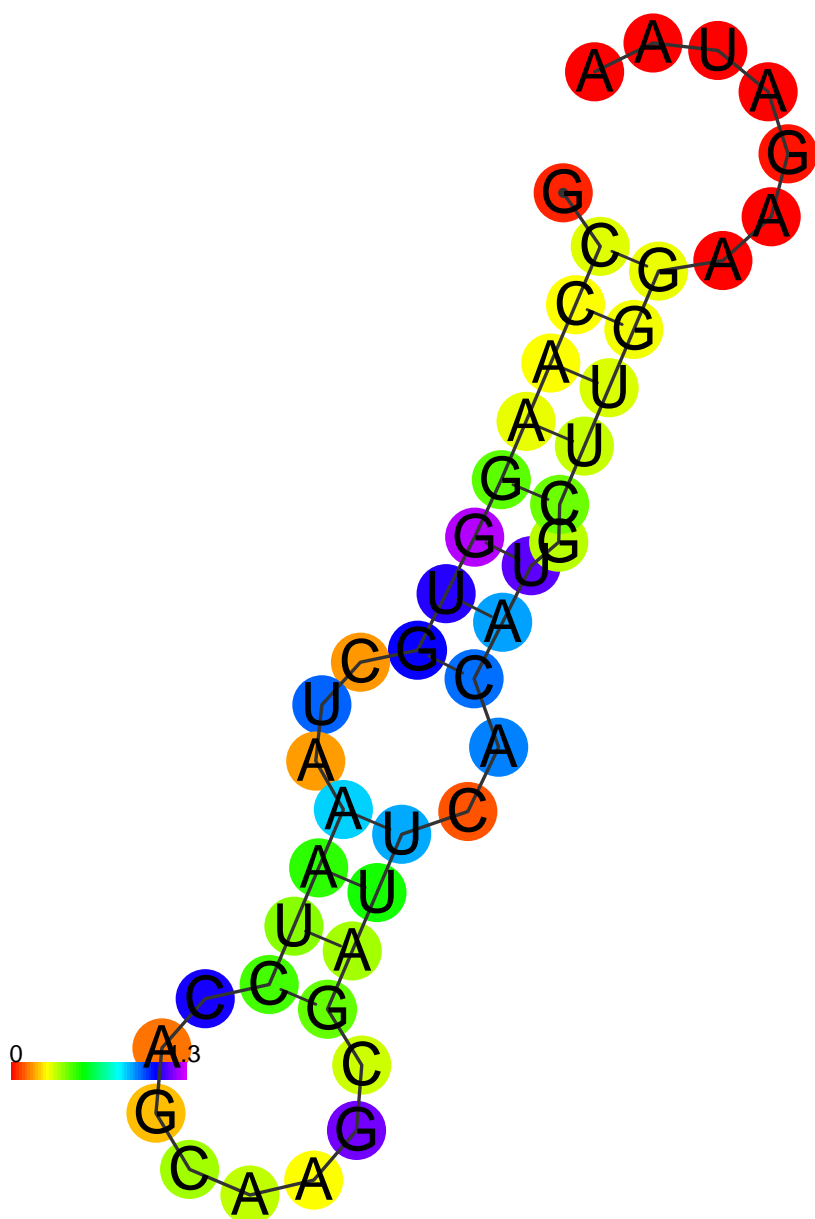

Supplement: Supplementary file 170 [file supplementary]

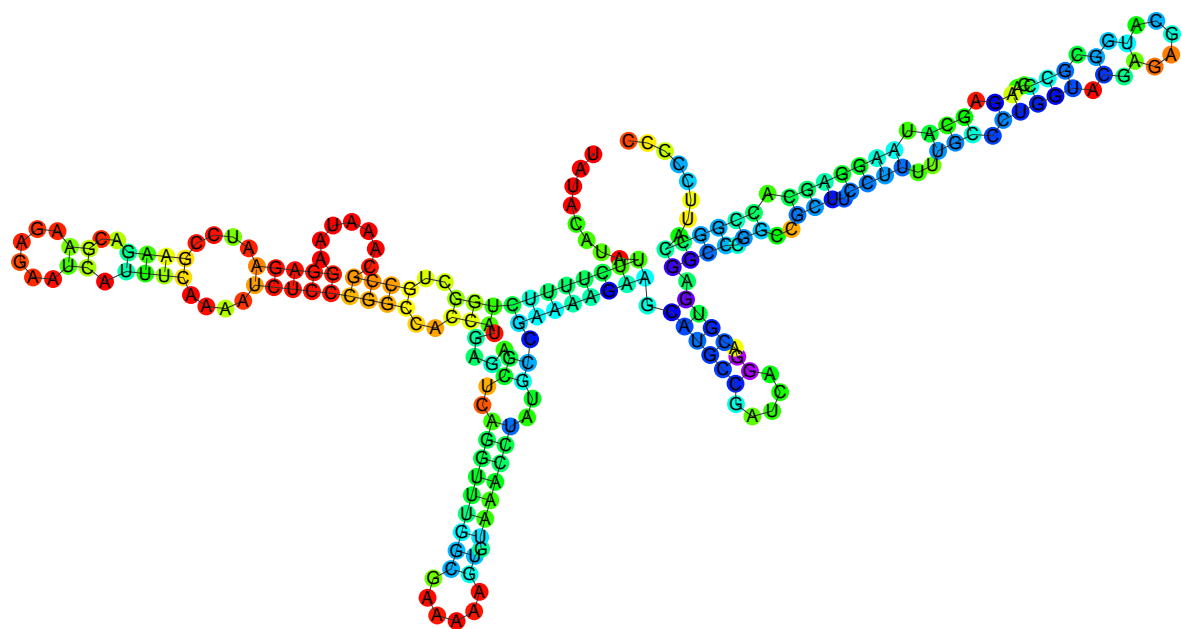

Supplement: Supplementary file 171 [file supplementary]

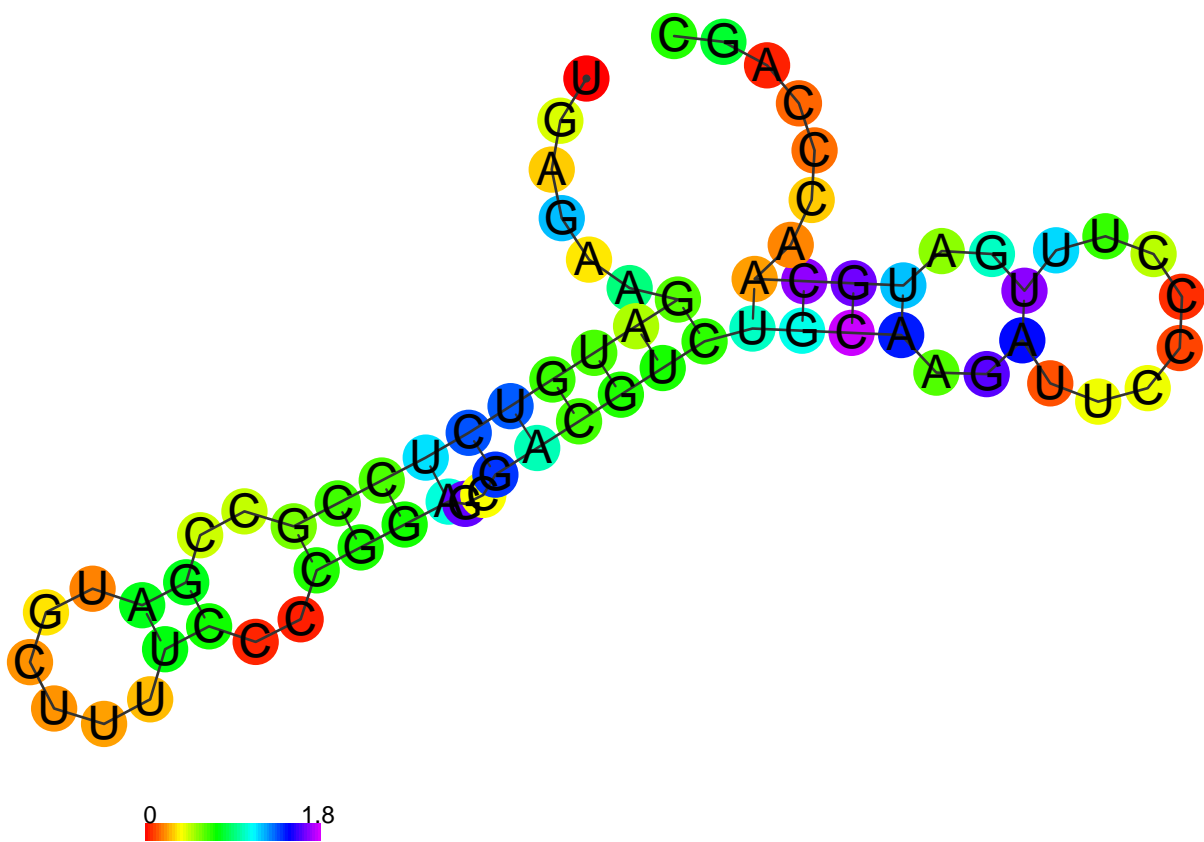

Supplement: Supplementary file 172 [file supplementary]

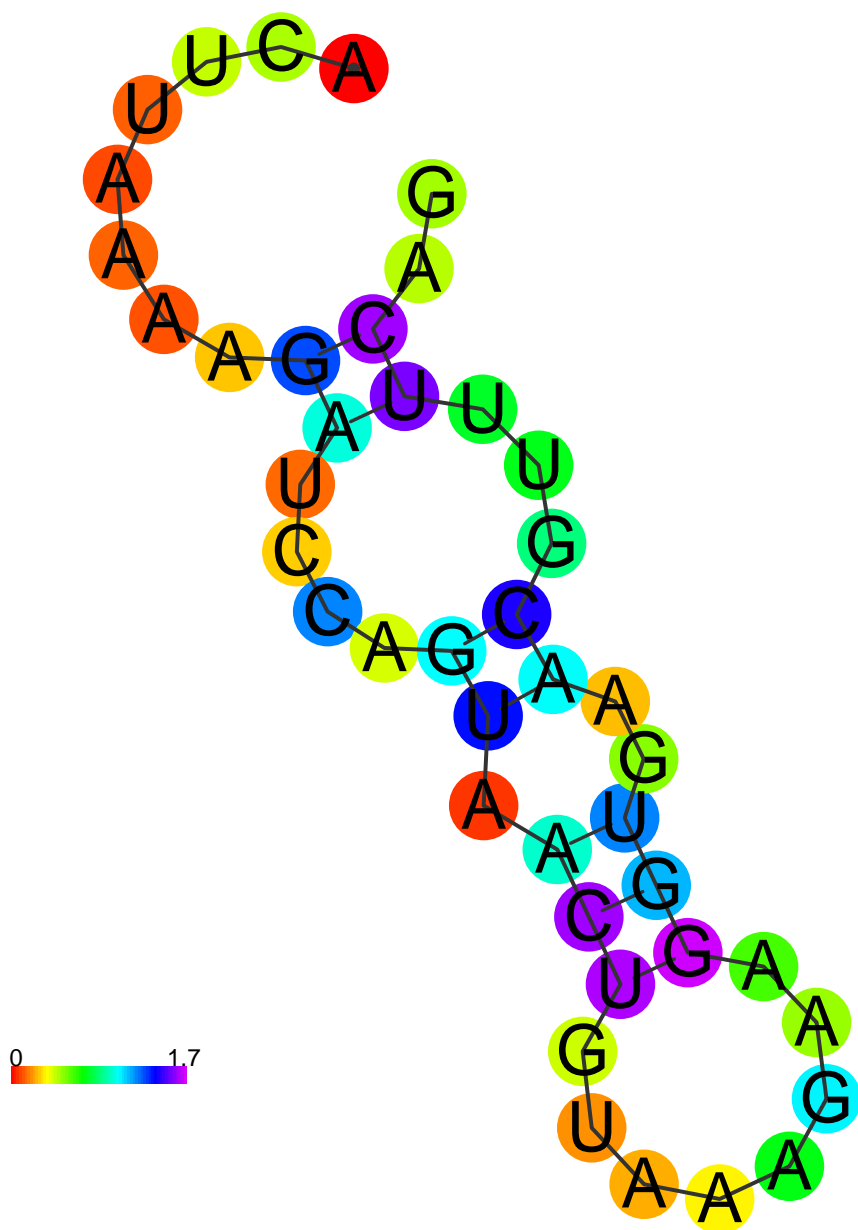

Supplement: Supplementary file 173 [file supplementary]



Supplement: Supplementary file 174 [file supplementary]

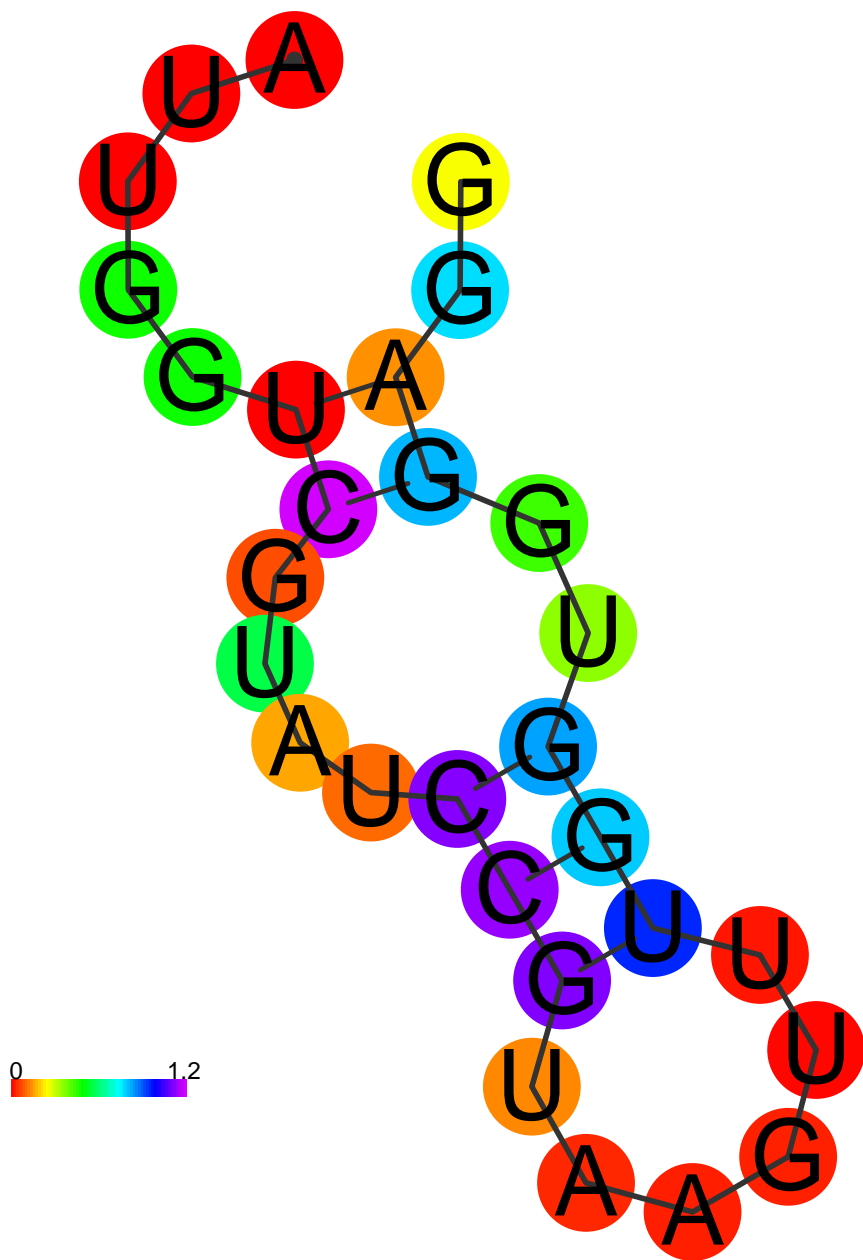

Supplement: Supplementary file 175 [file supplementary]



Supplement: Supplementary file 176 [file supplementary]

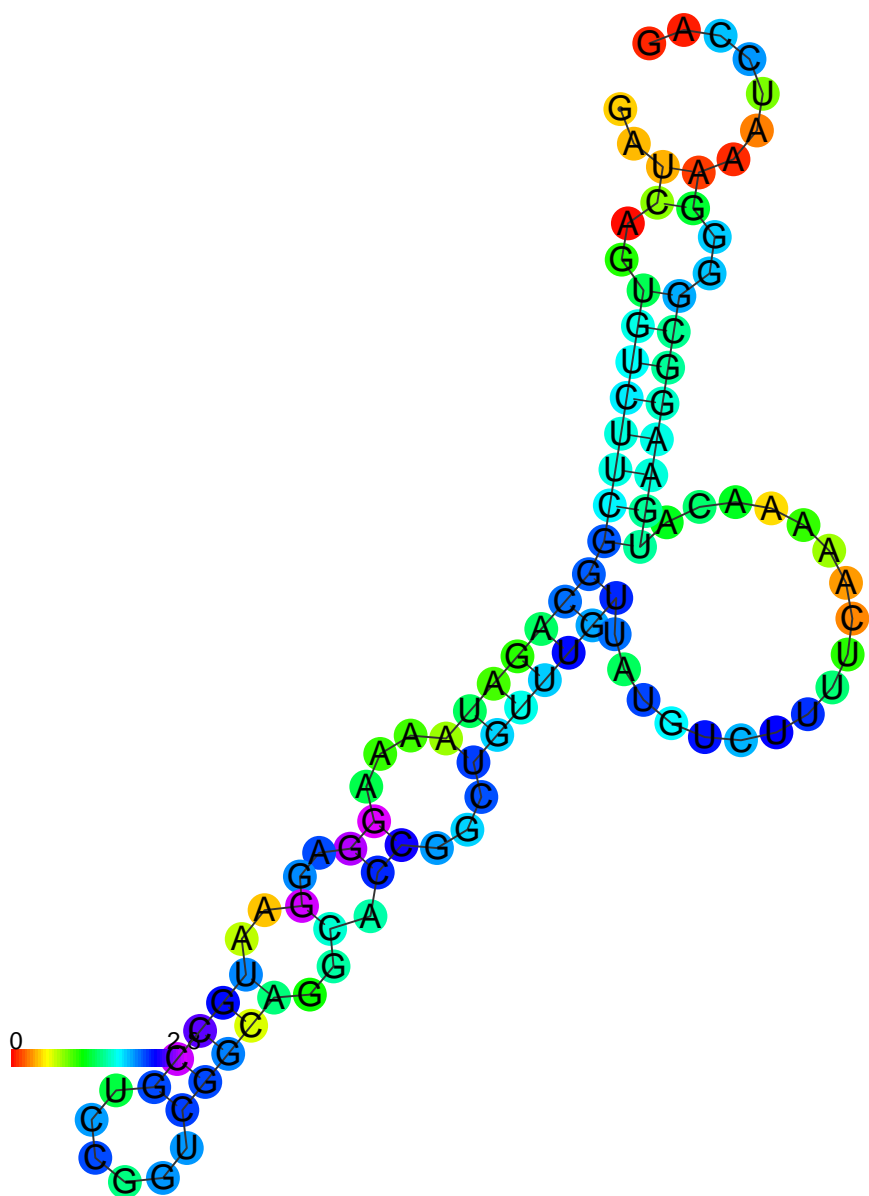

Supplement: Supplementary file 177 [file supplementary]

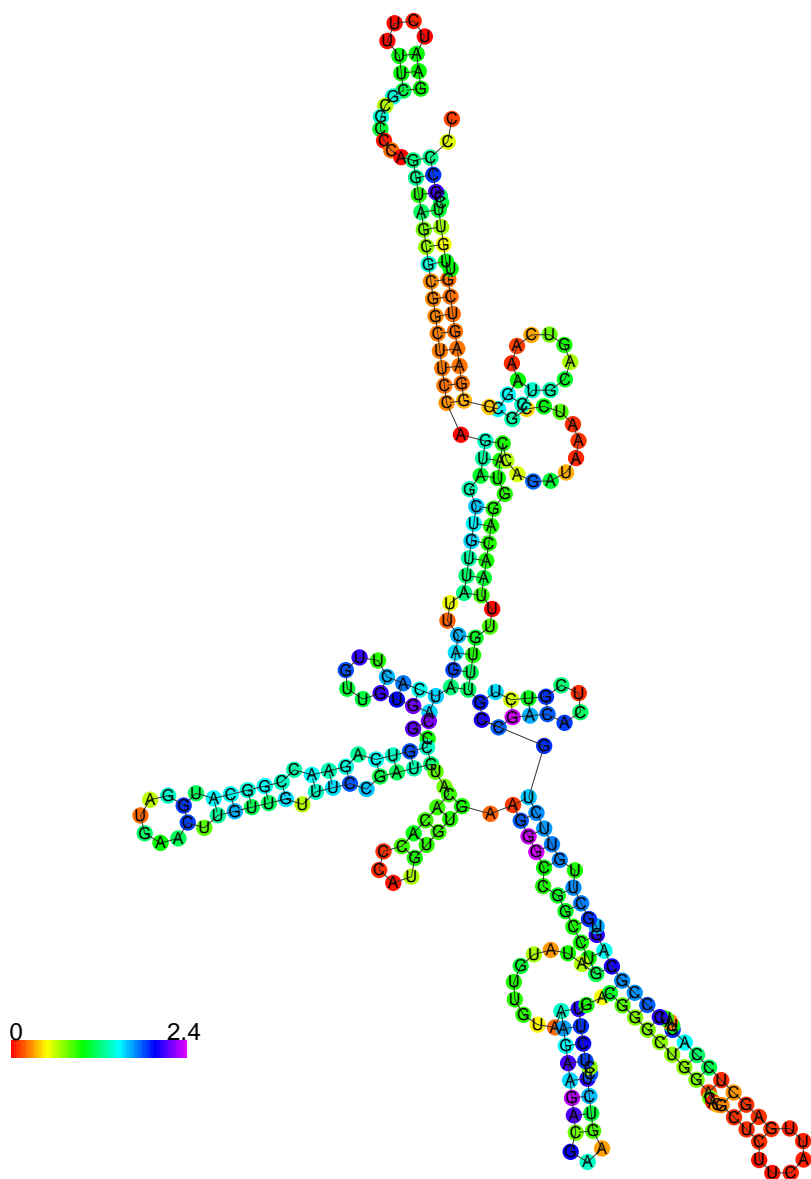

Supplement: Supplementary file 178 [file supplementary]

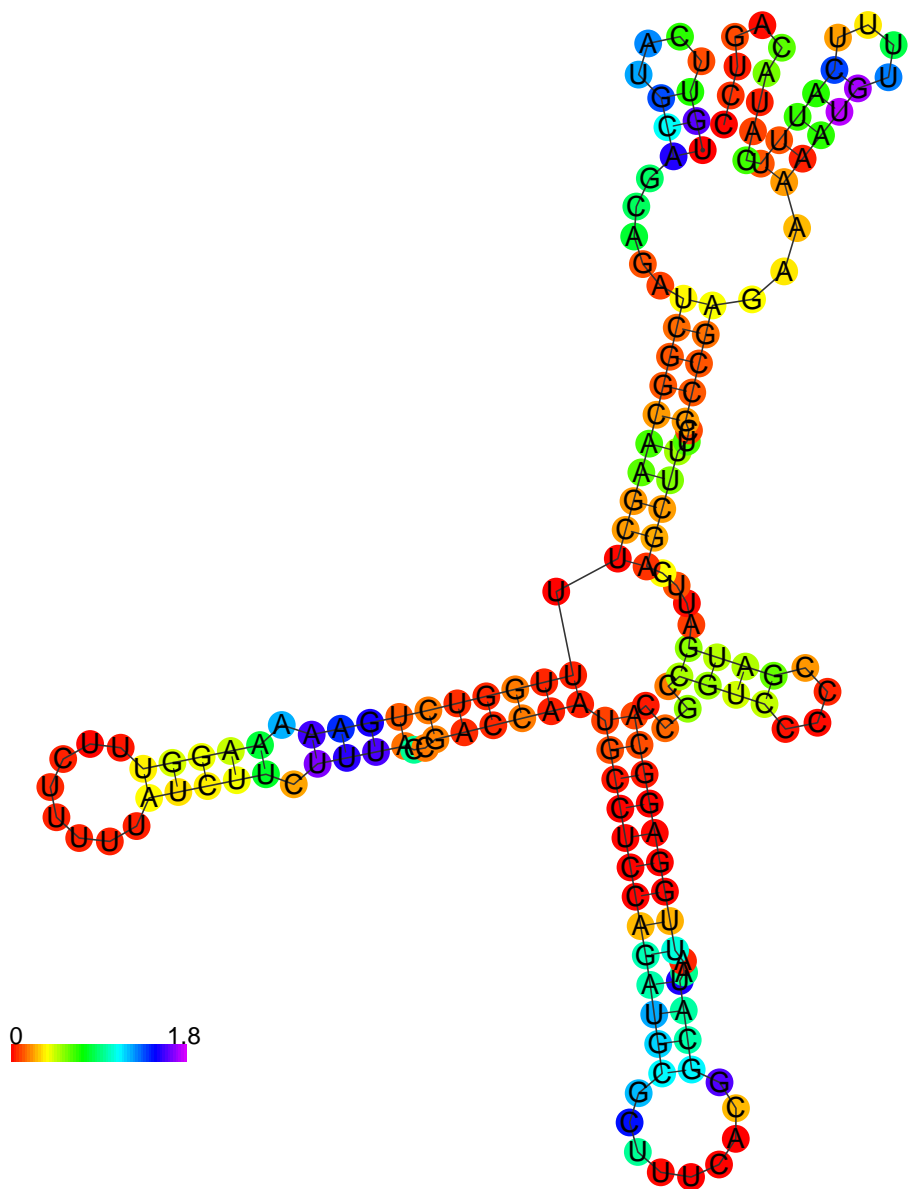

Supplement: Supplementary file 179 [file supplementary]

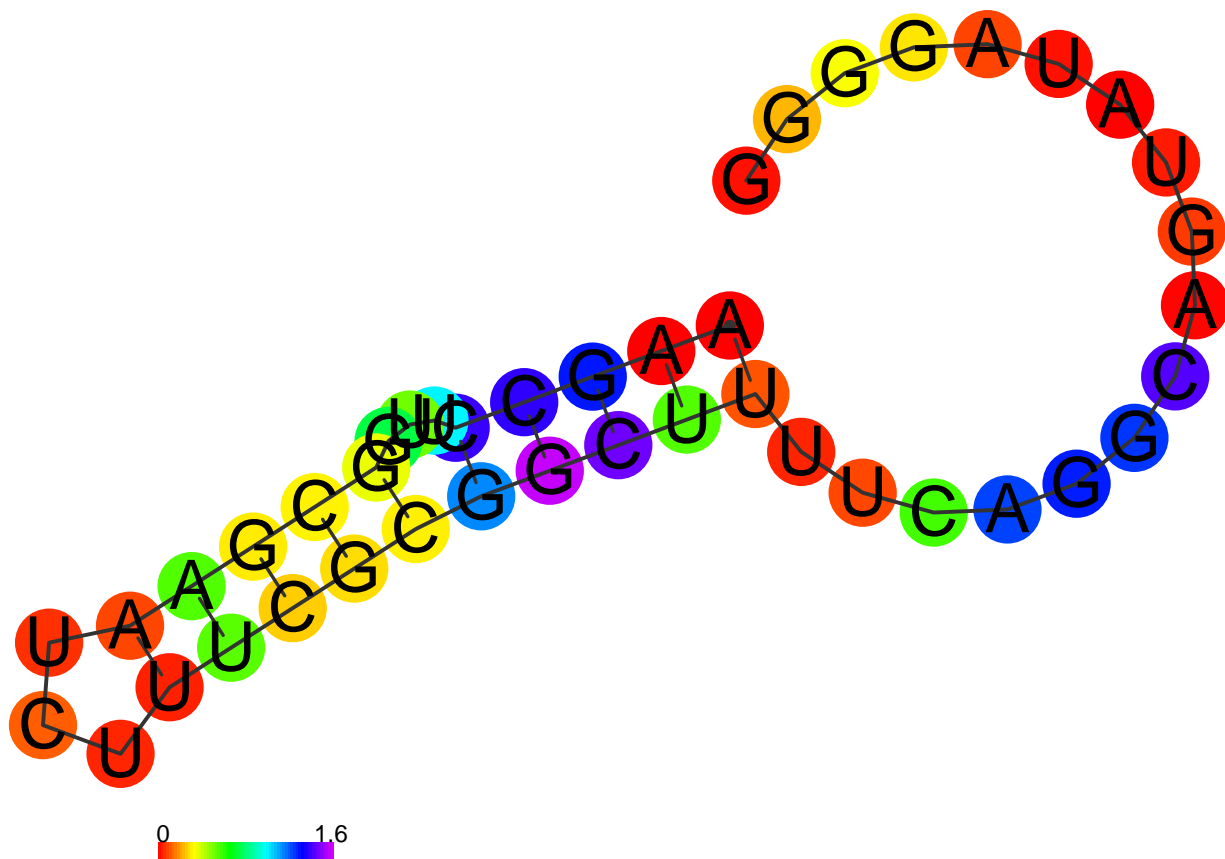

Supplement: Supplementary file 180 [file supplementary]

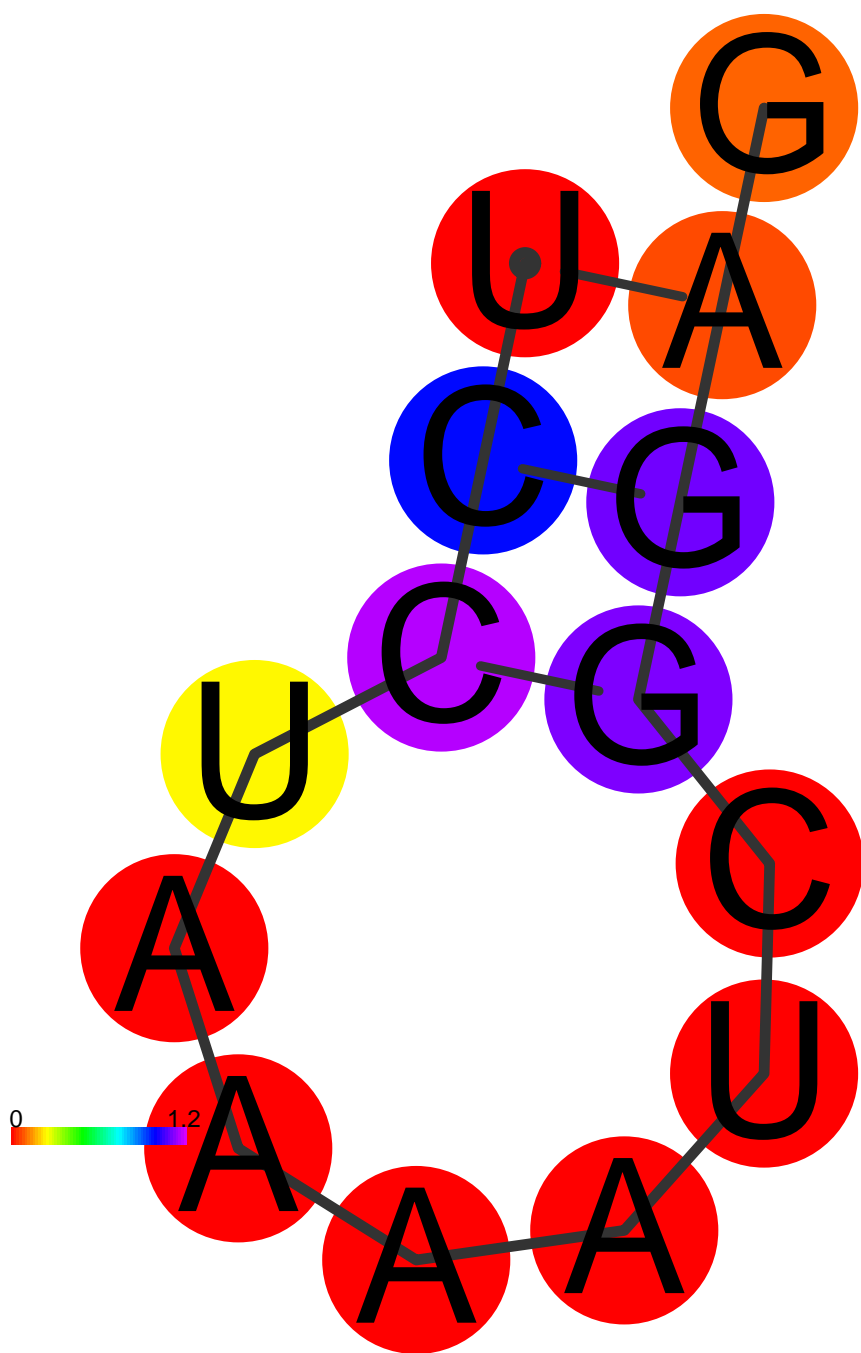

Supplement: Supplementary file 181 [file supplementary]

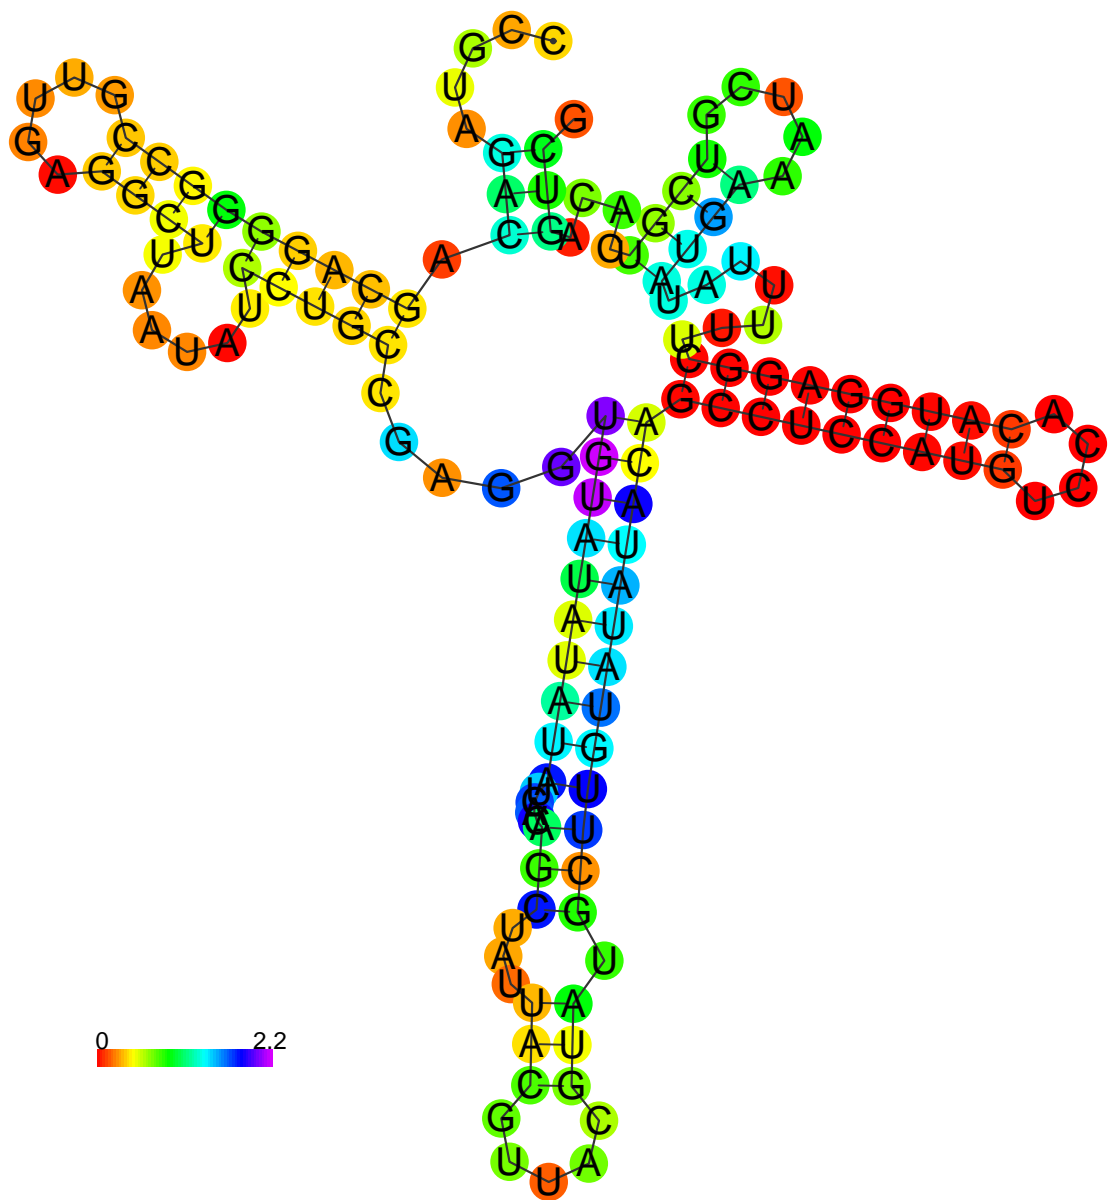

Supplement: Supplementary file 182 [file supplementary]

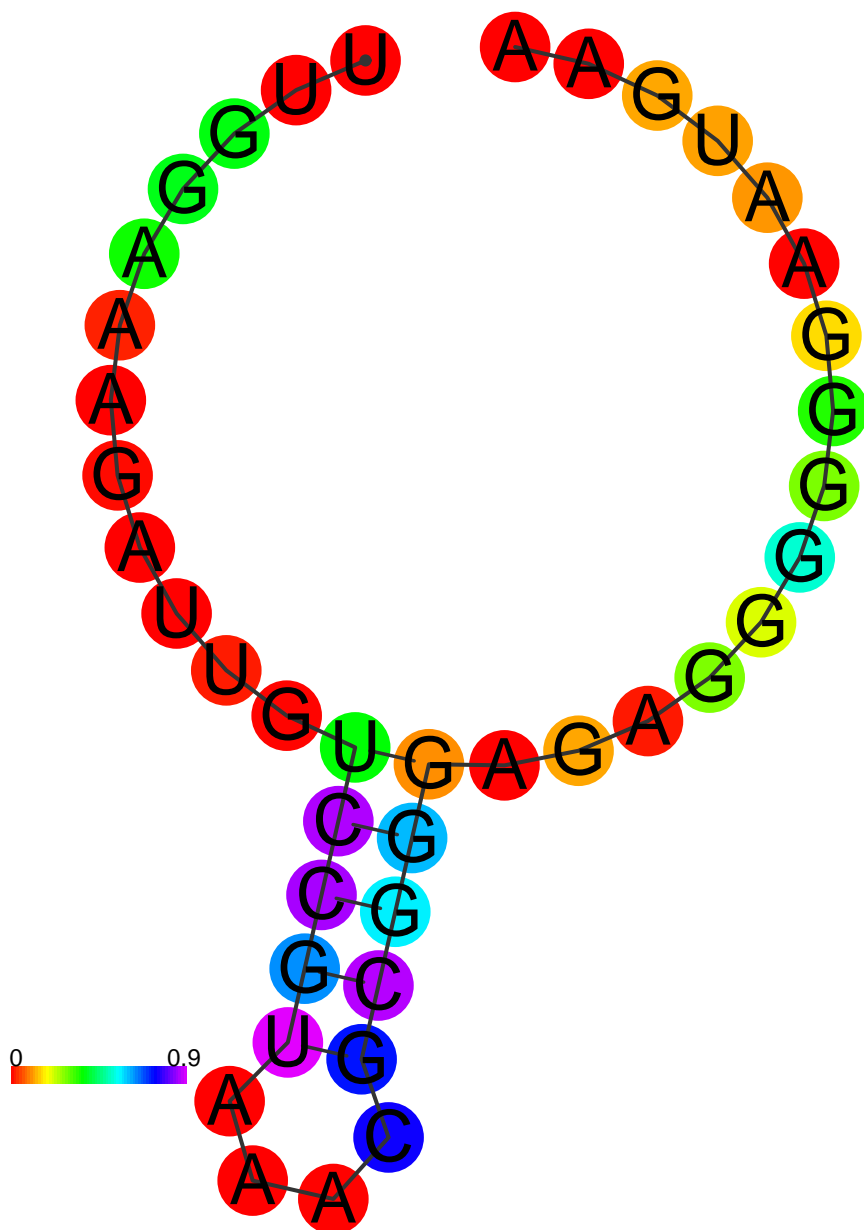

Supplement: Supplementary file 183 [file supplementary]

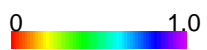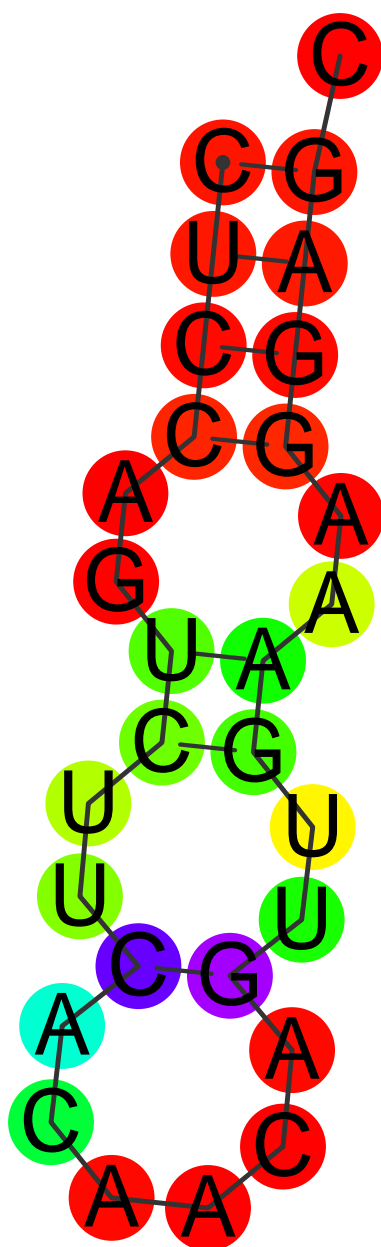

Supplement: Supplementary file 184 [file supplementary]

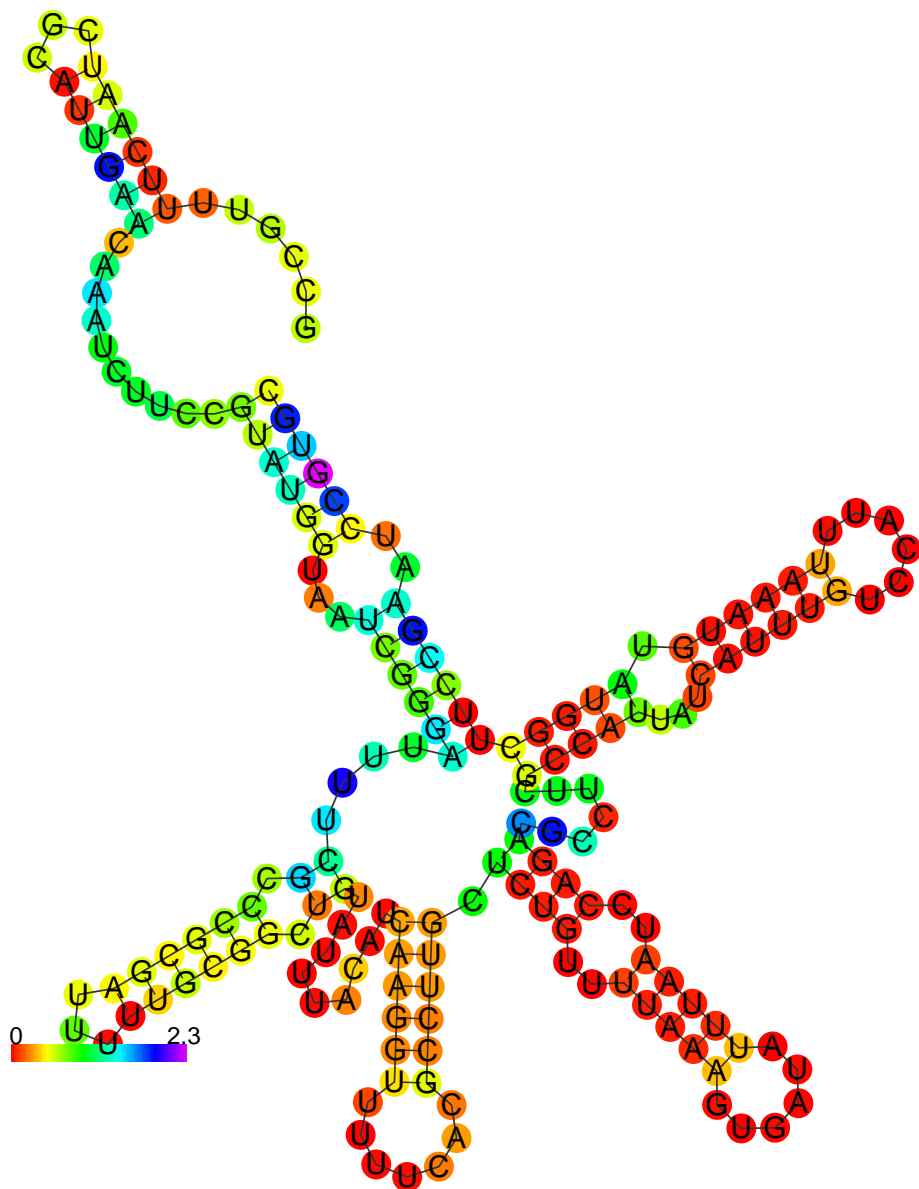

Supplement: Supplementary file 185 [file supplementary]

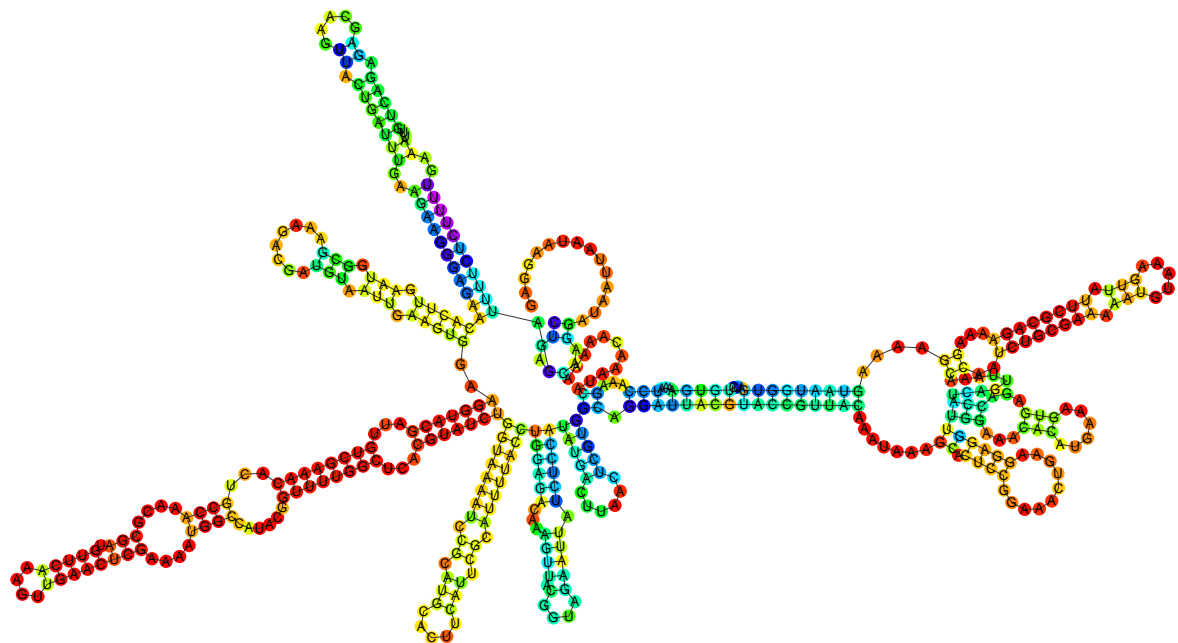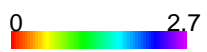

Supplement: Supplementary file 186 [file supplementary]

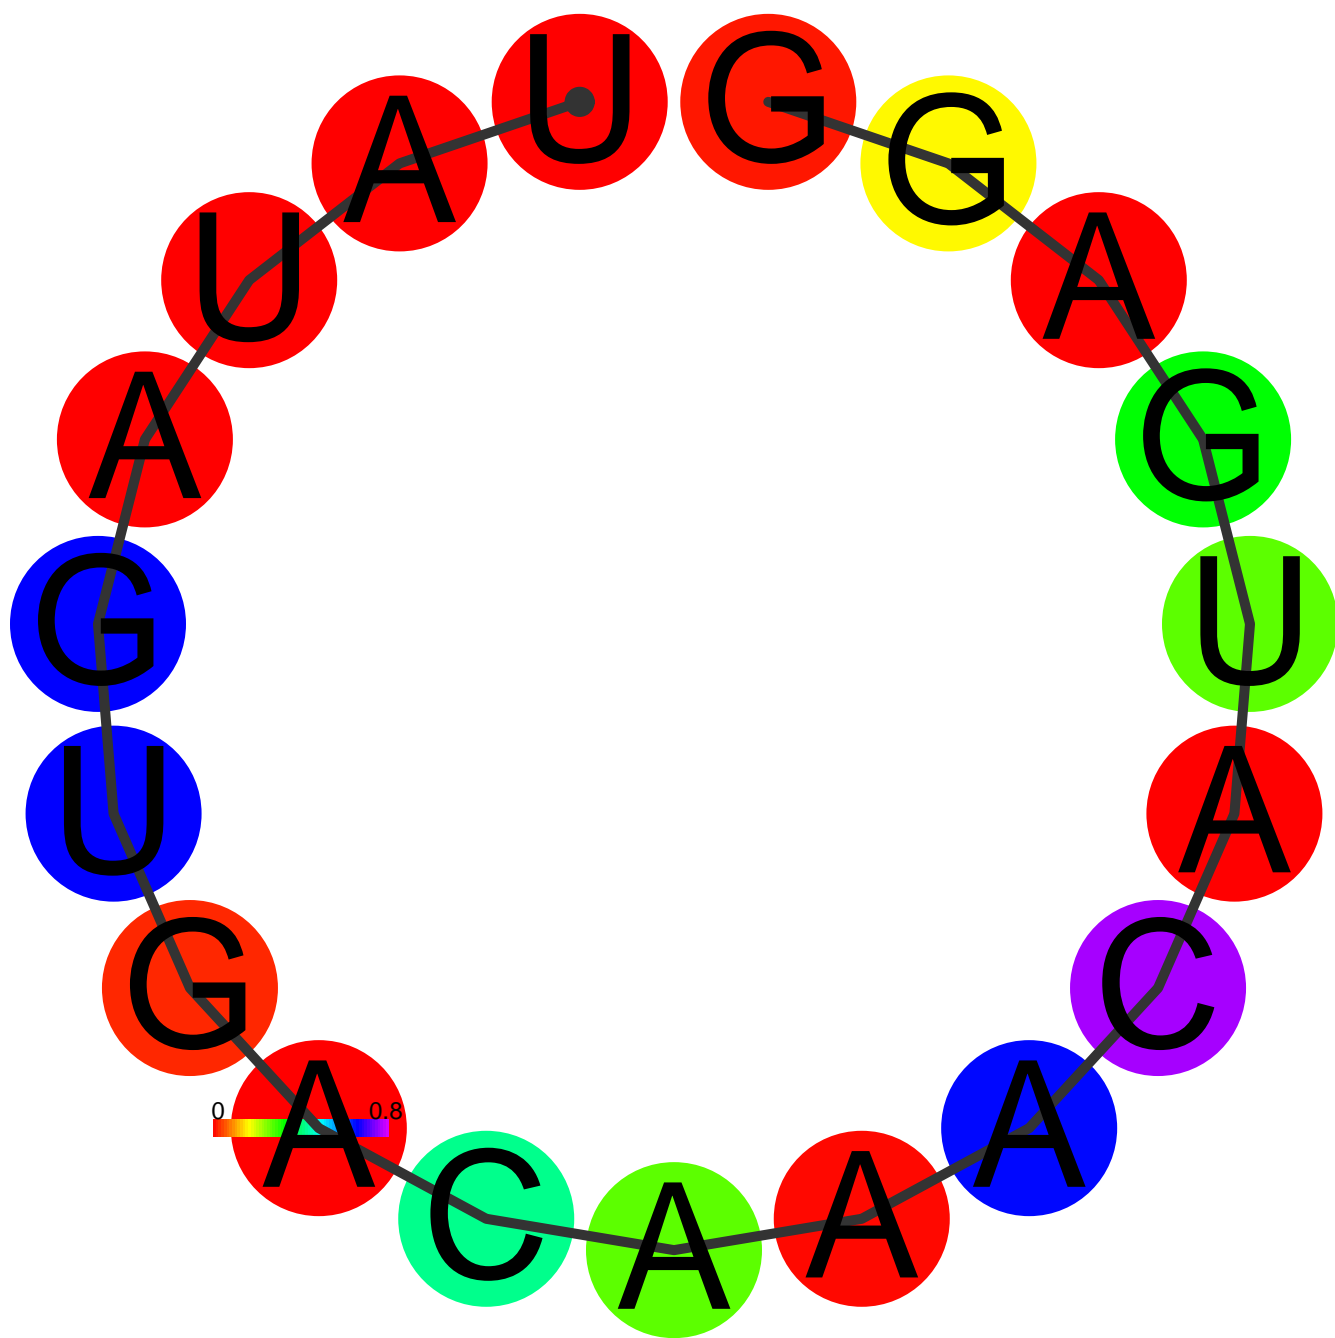

Supplement: Supplementary file 187 [file supplementary]

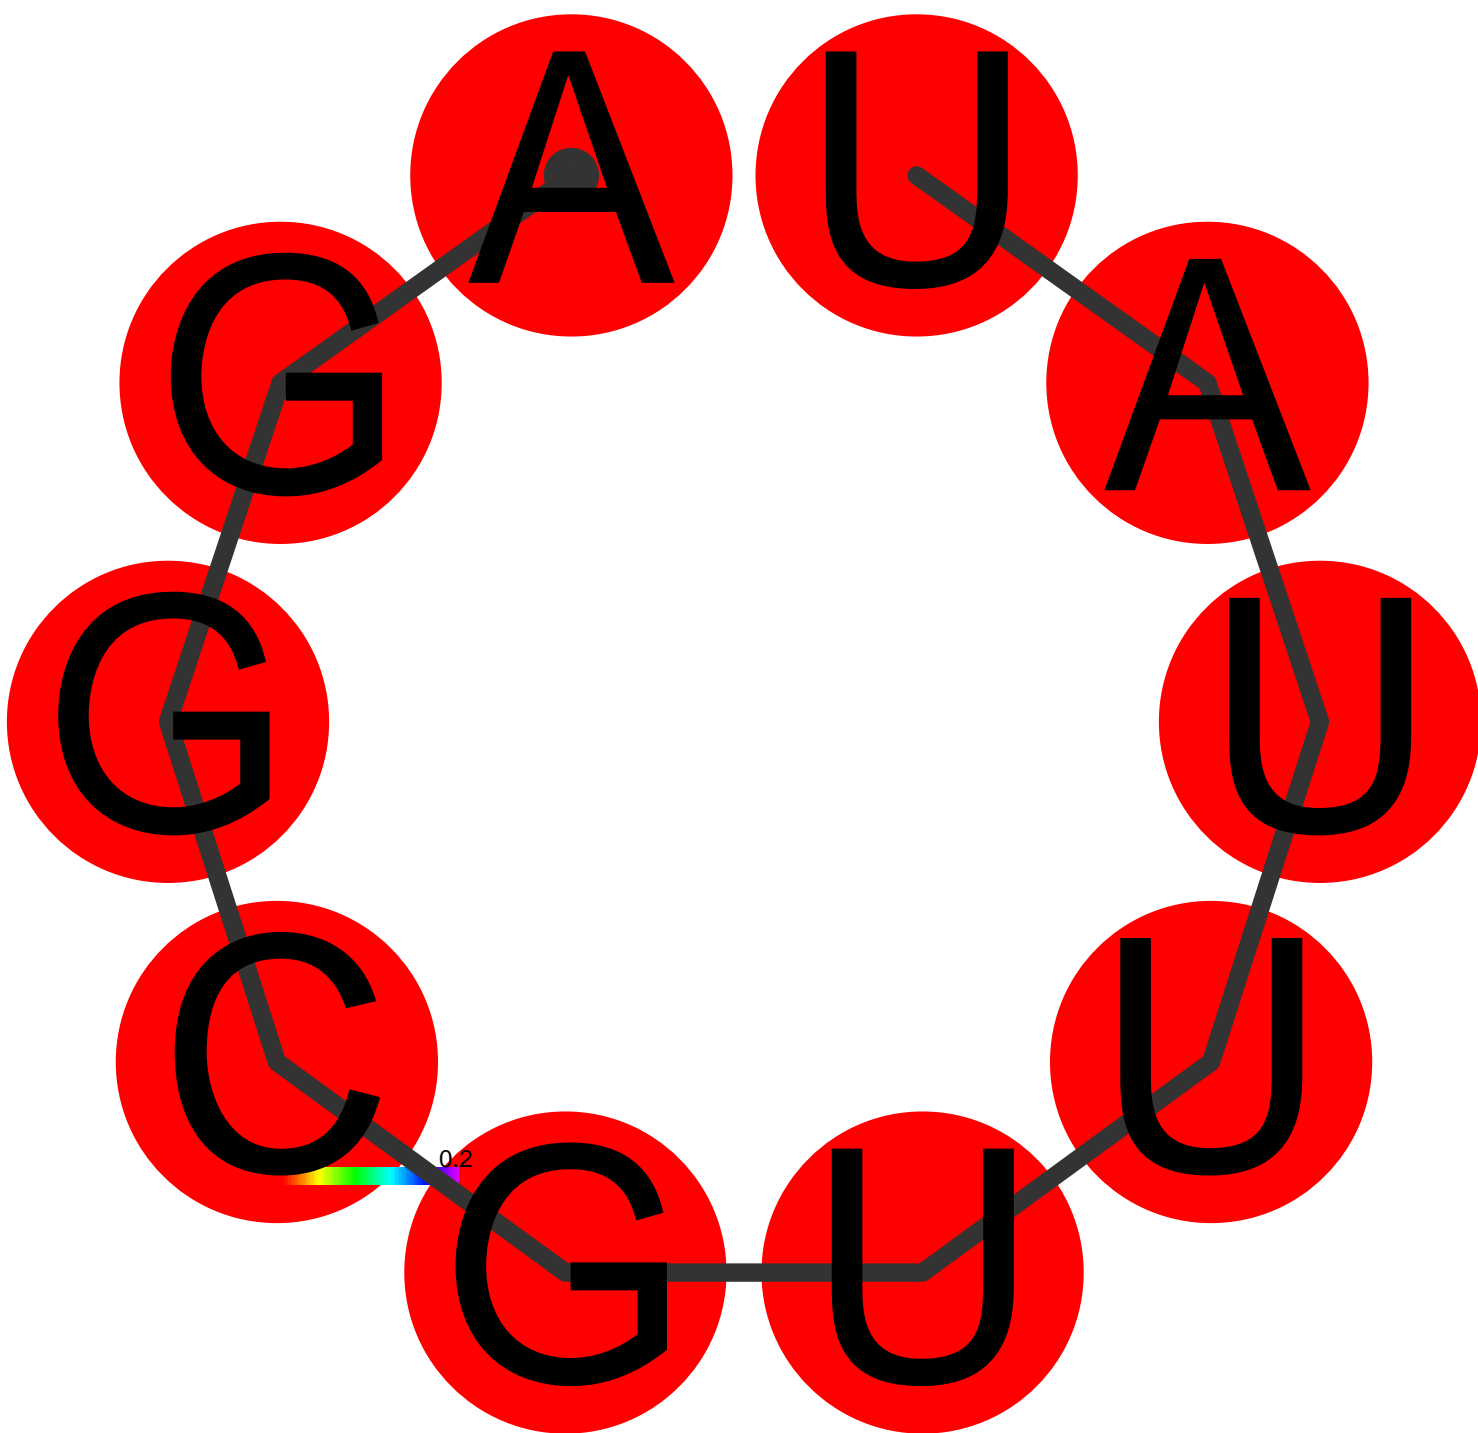

Supplement: Supplementary file 188 [file supplementary]

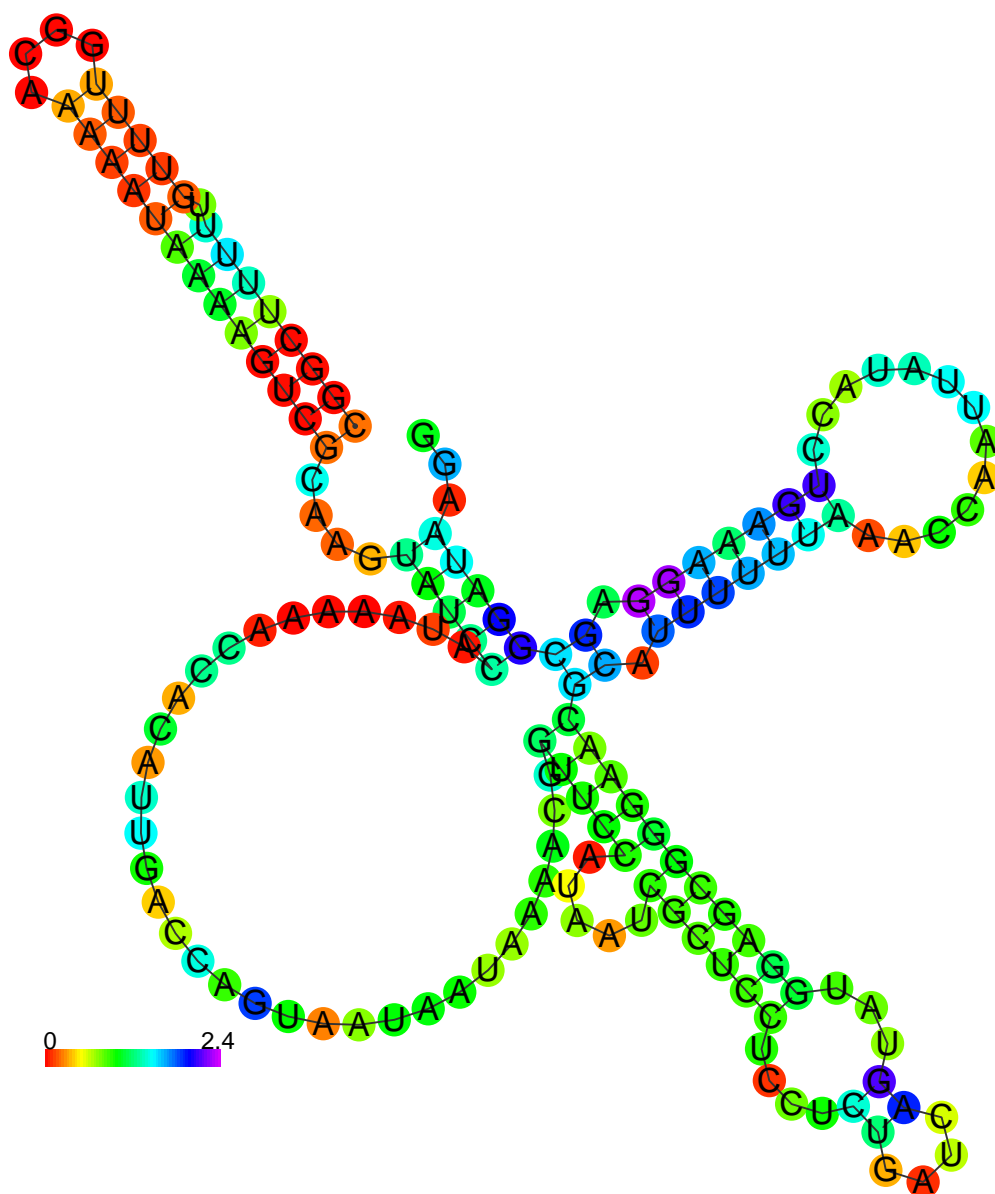

Supplement: Supplementary file 189 [file supplementary]

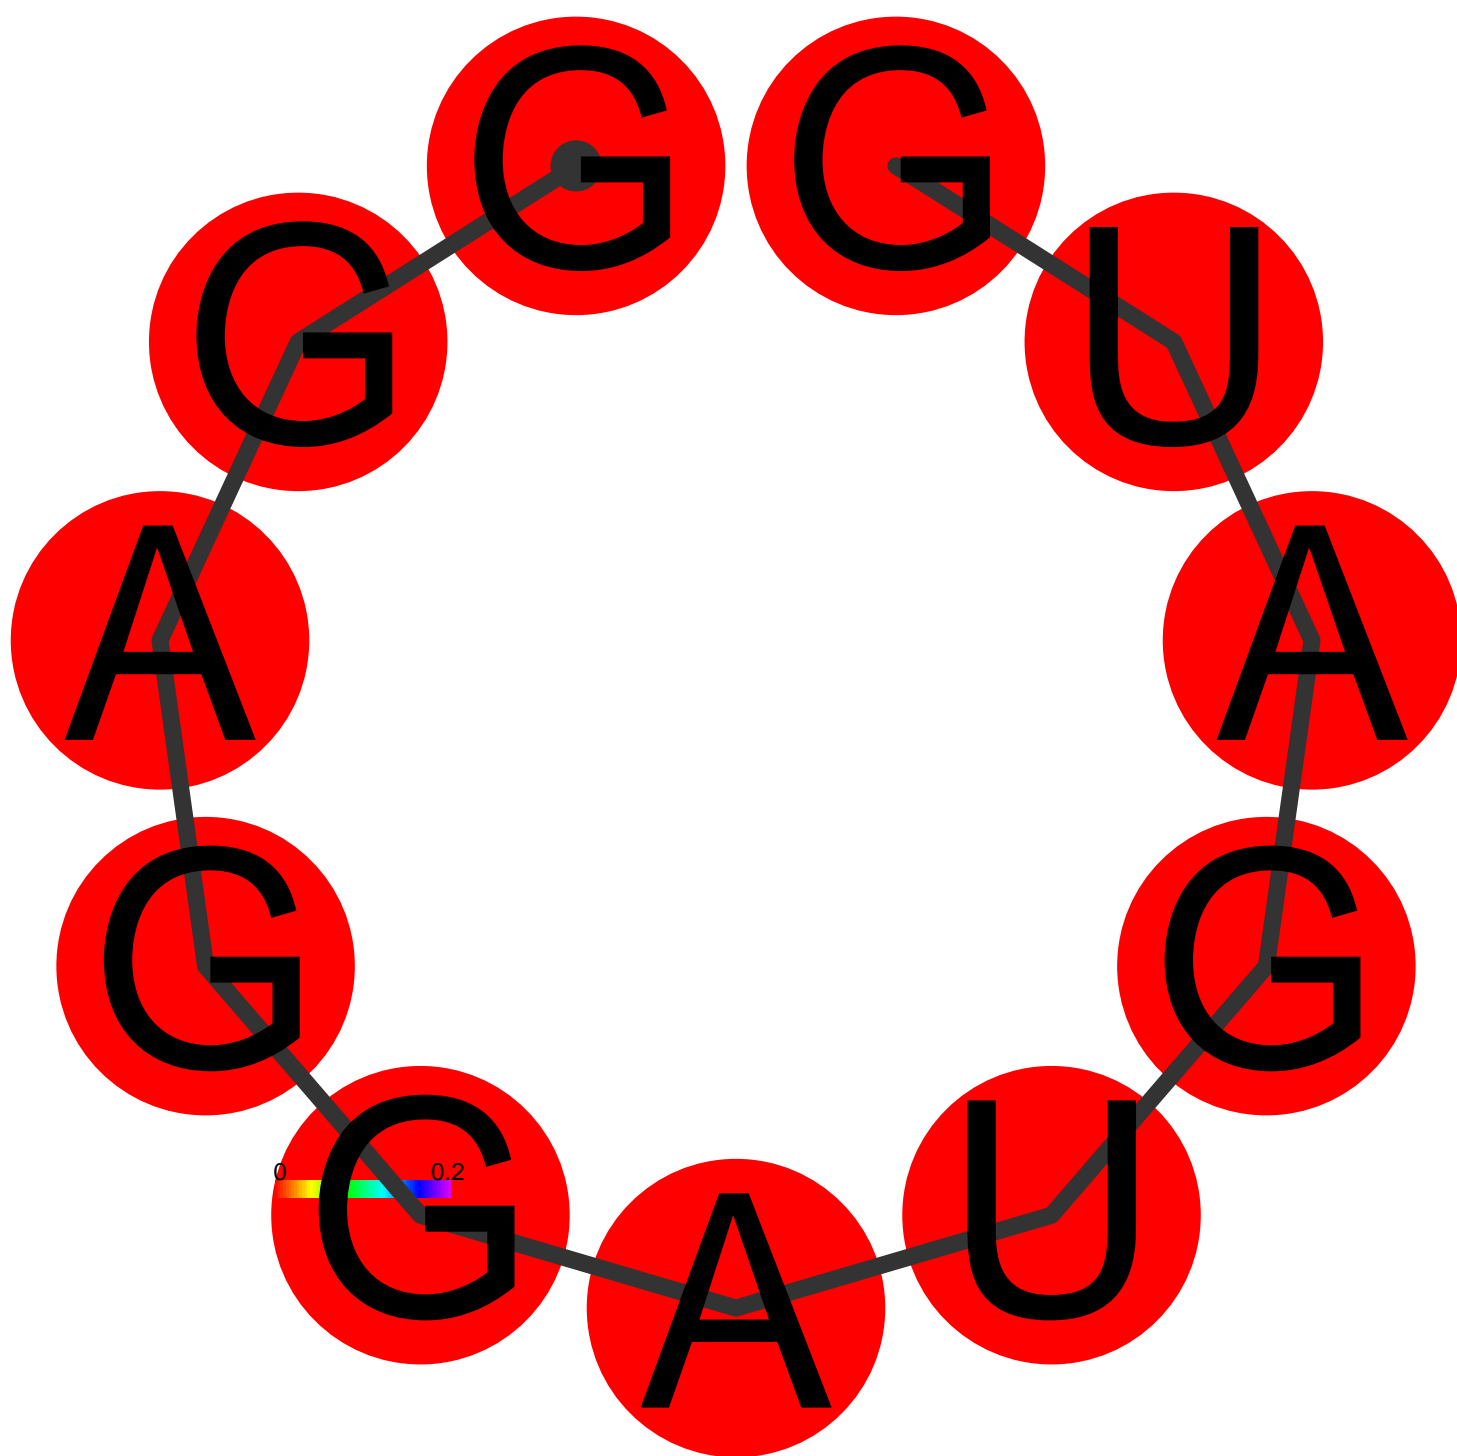

Supplement: Supplementary file 190 [file supplementary]

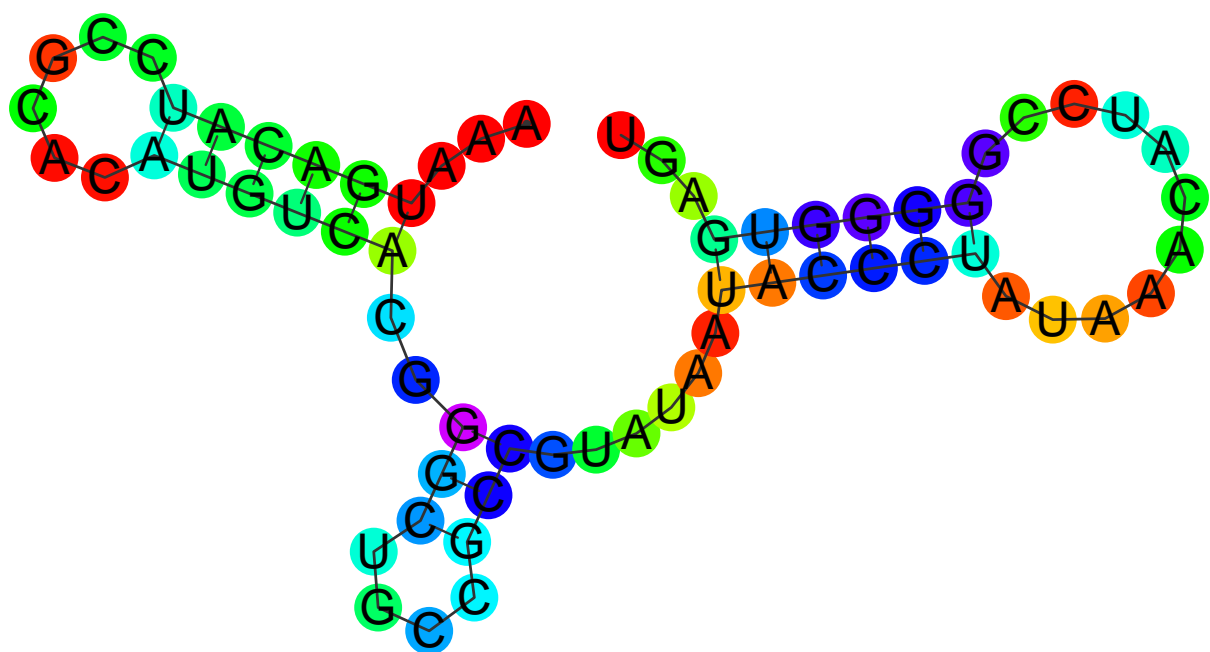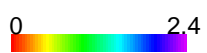

Supplement: Supplementary file 191 [file supplementary]

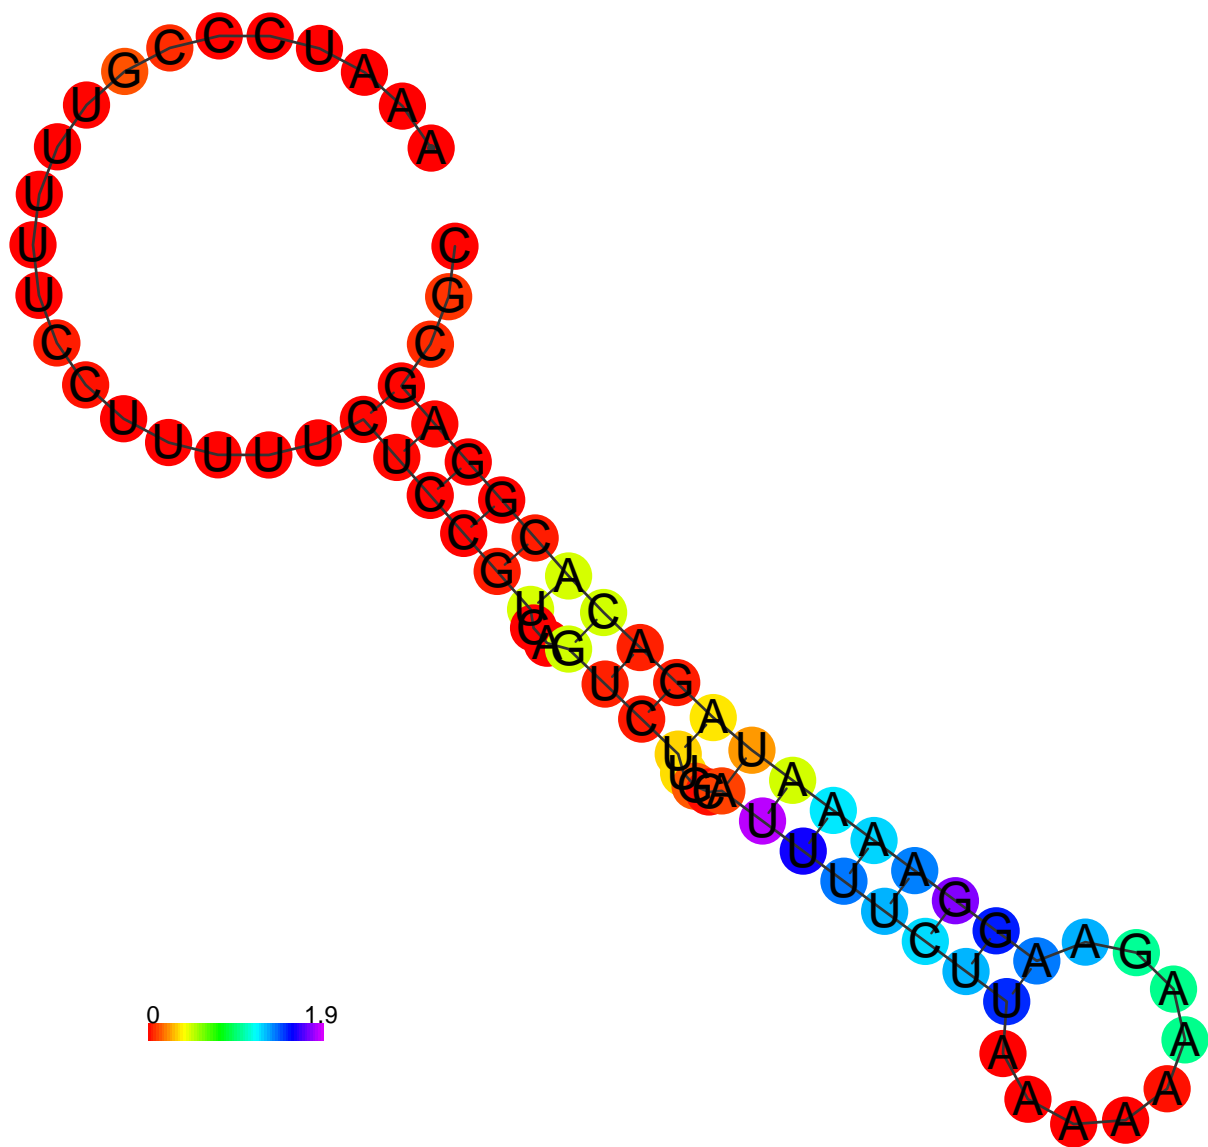

Supplement: Supplementary file 192 [file supplementary]

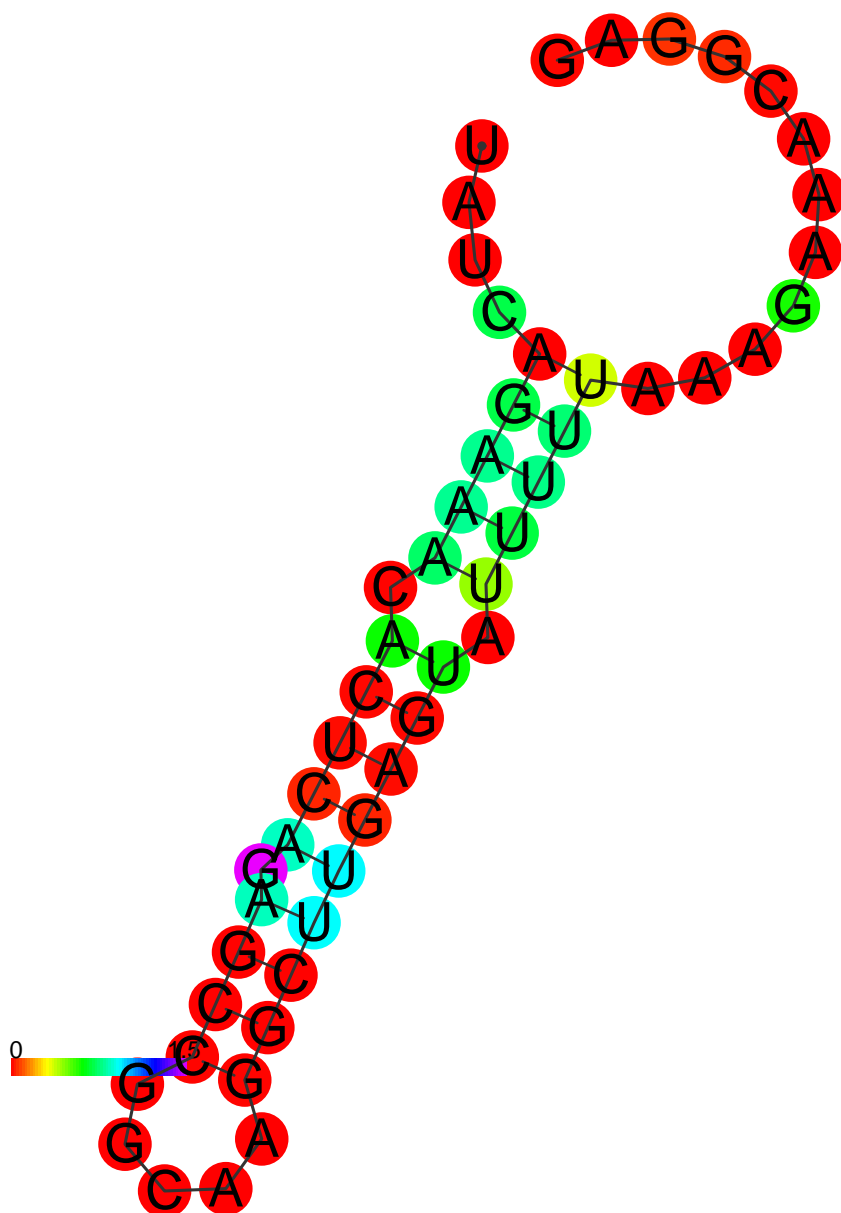

Supplement: Supplementary file 193 [file supplementary]

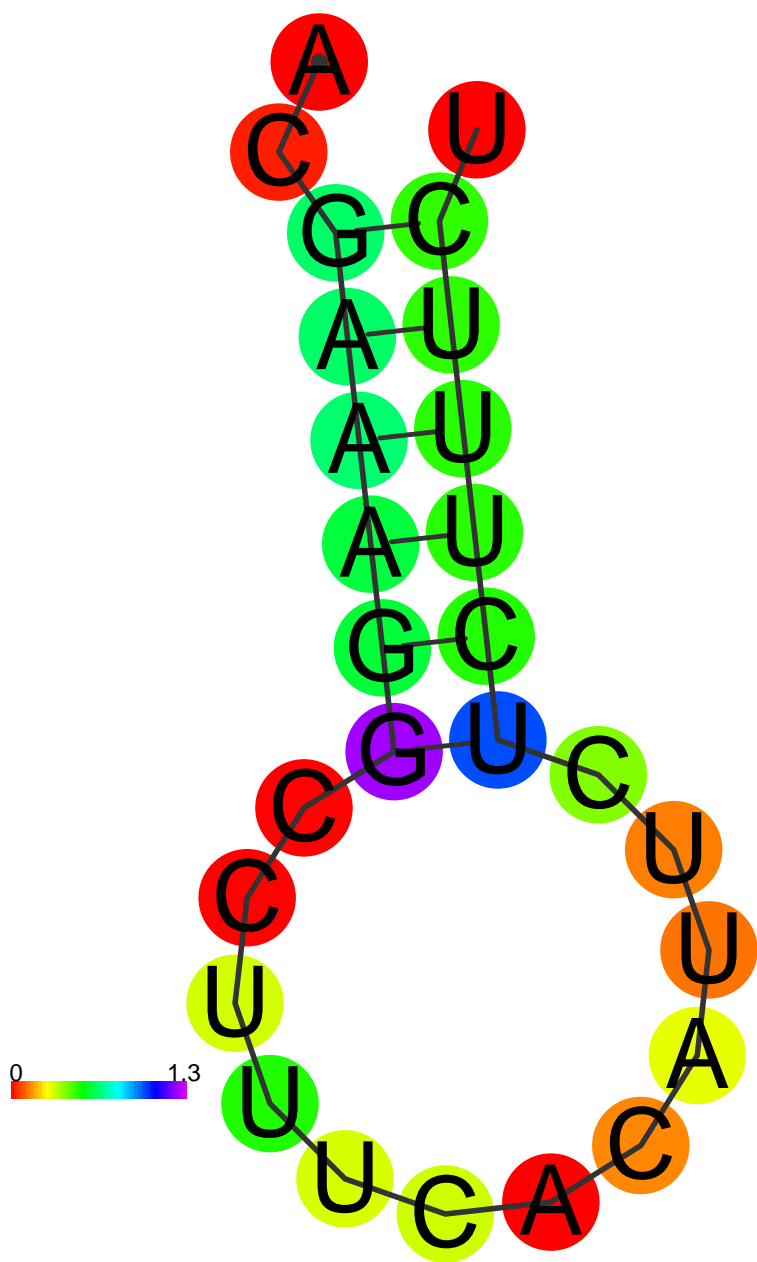

Supplement: Supplementary file 194 [file supplementary]

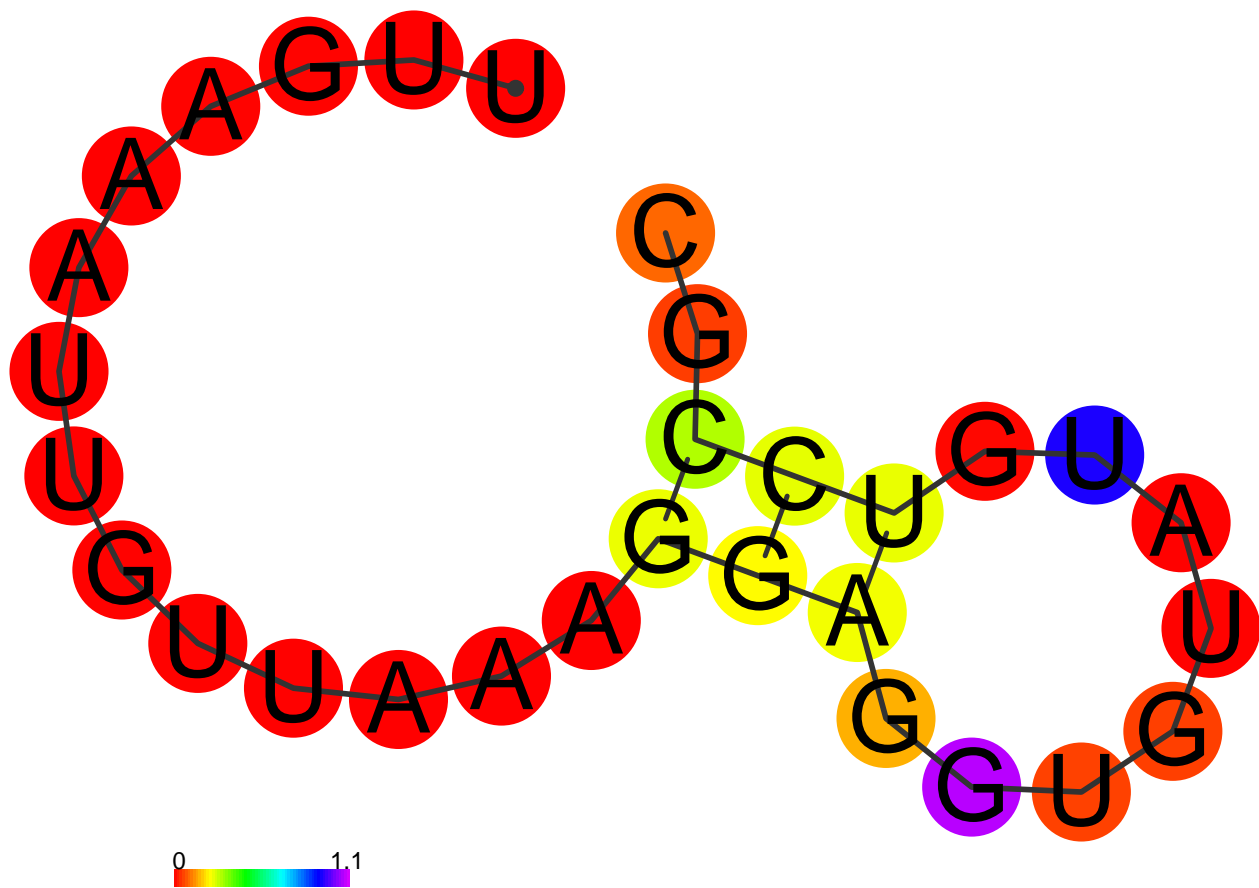

Supplement: Supplementary file 195 [file supplementary]

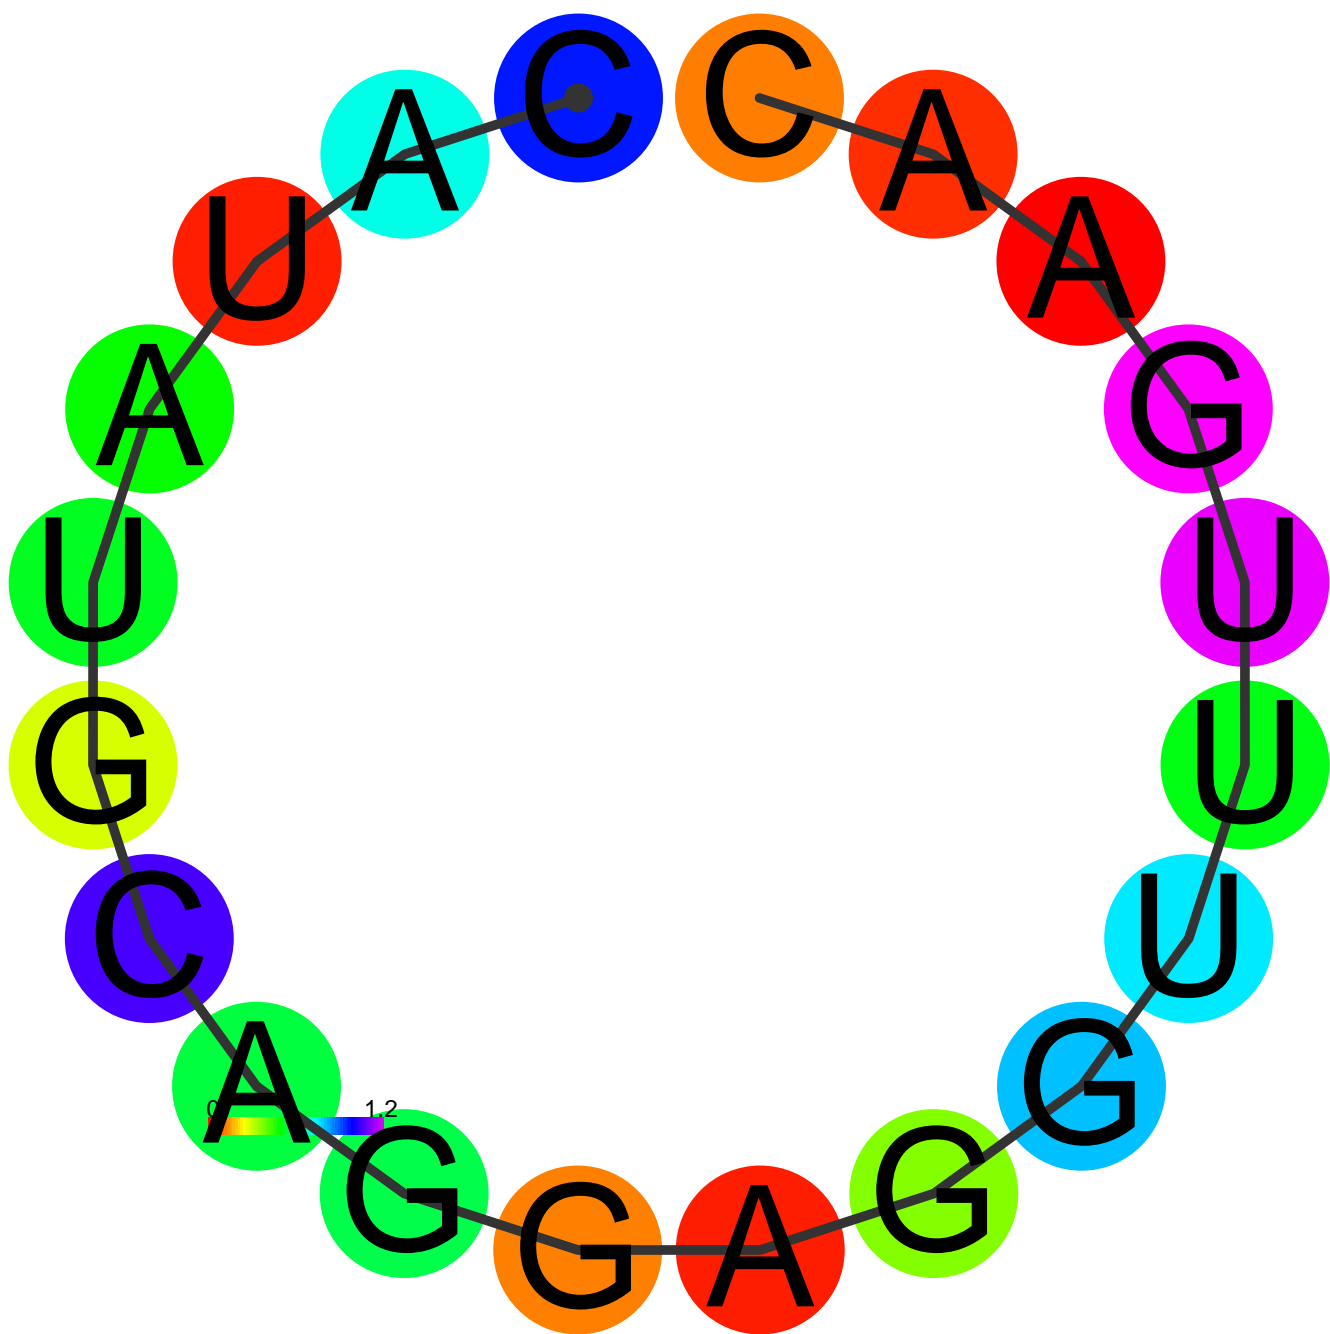

Supplement: Supplementary file 196 [file supplementary]

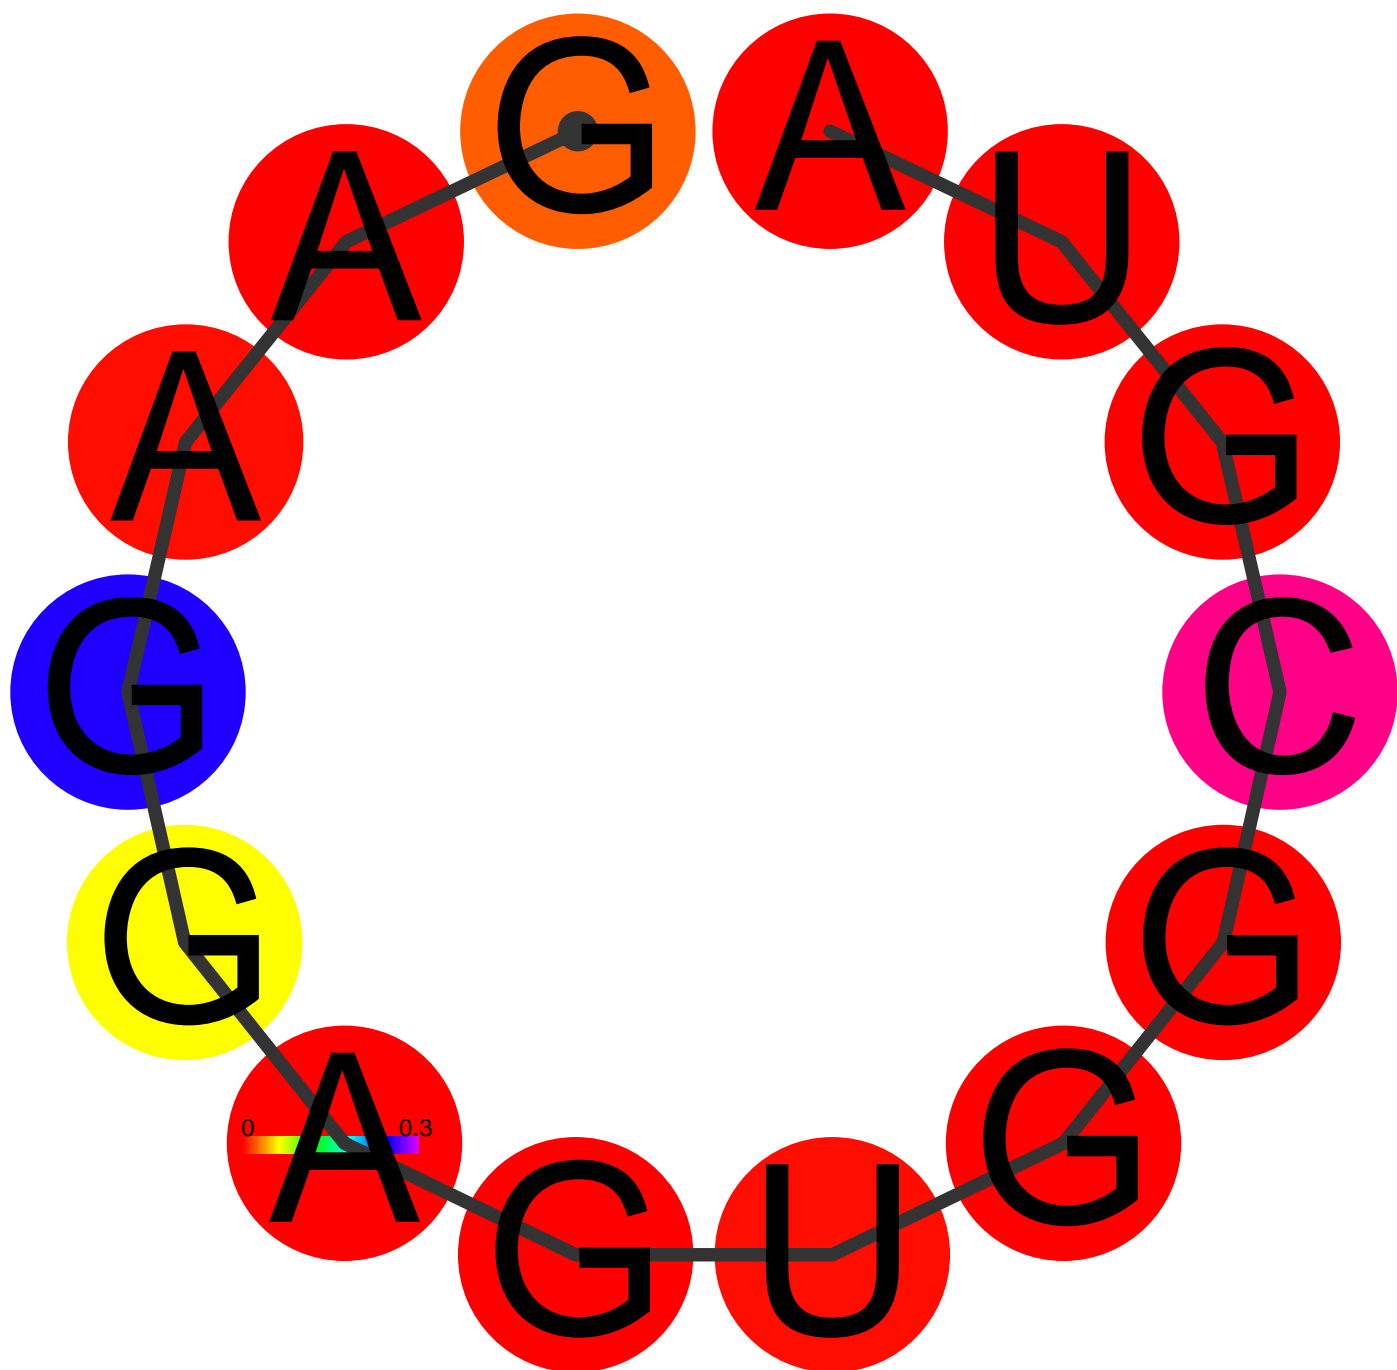

Supplement: Supplementary file 197 [file supplementary]

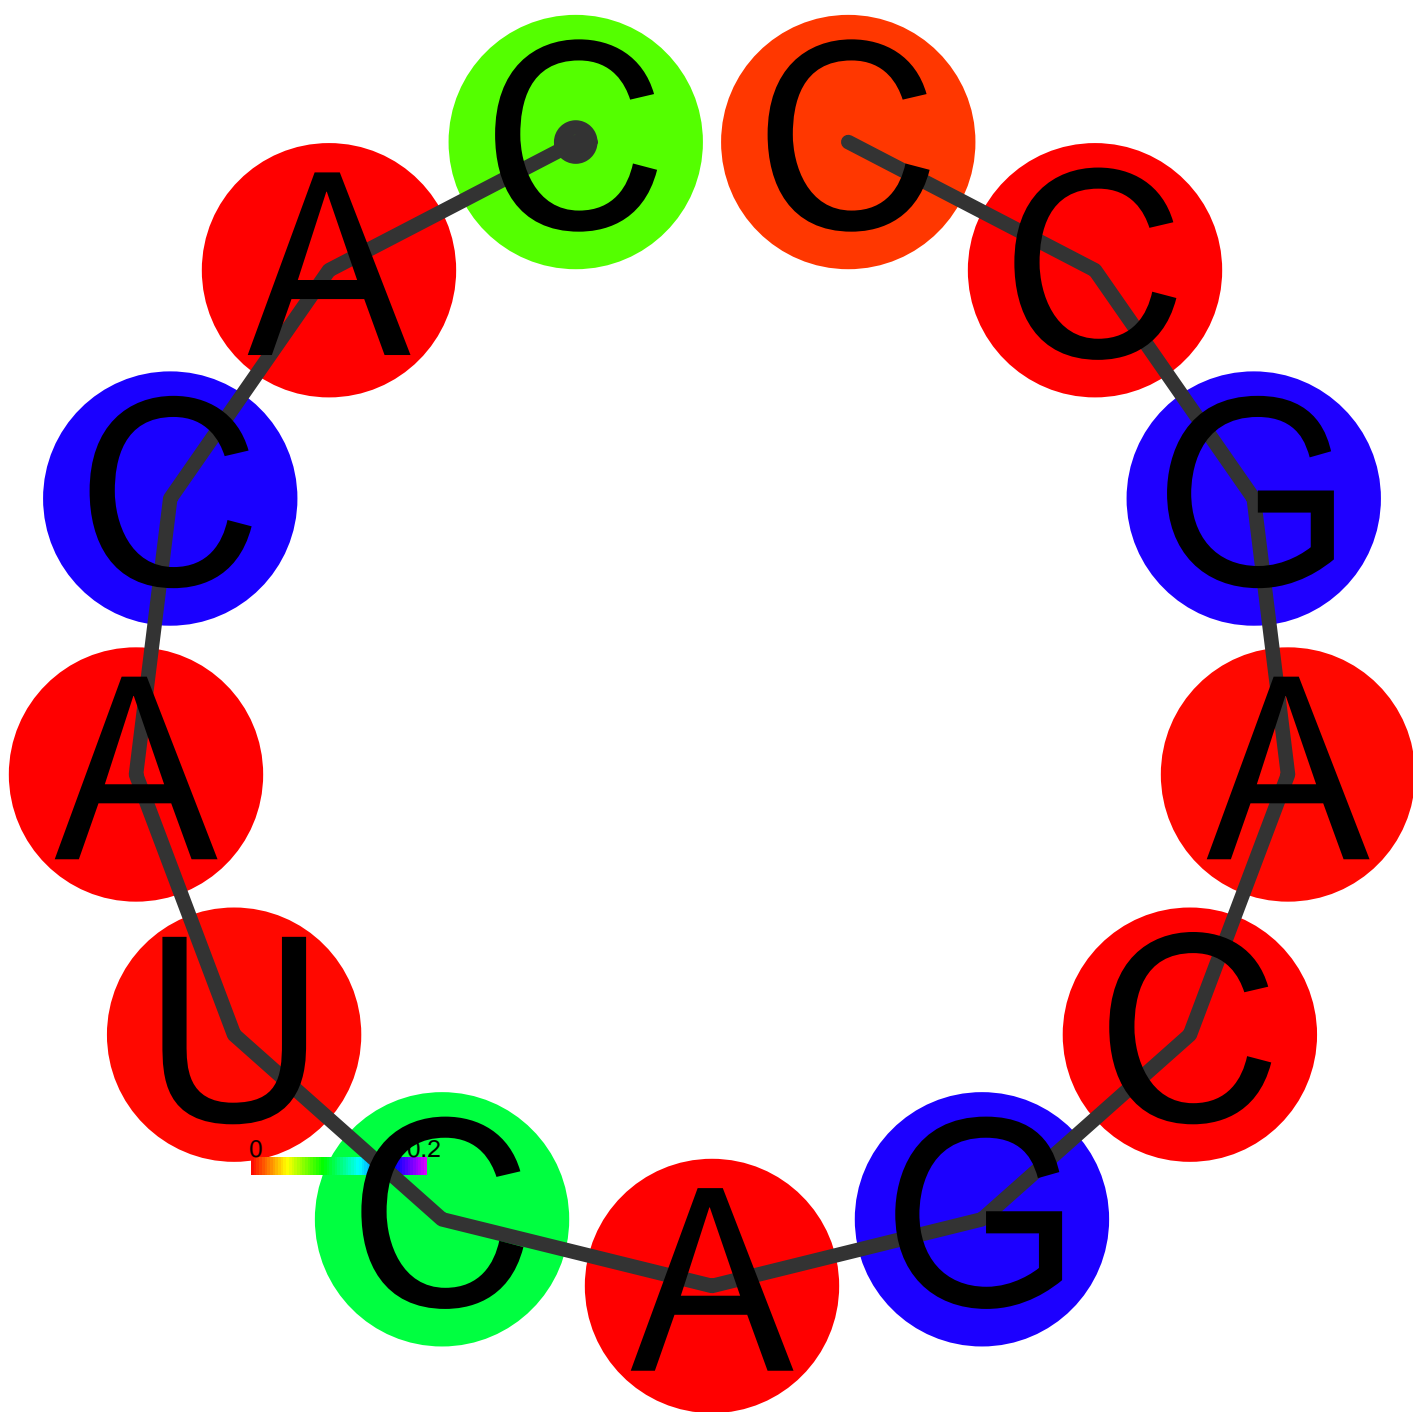

Supplement: Supplementary file 198 [file supplementary]

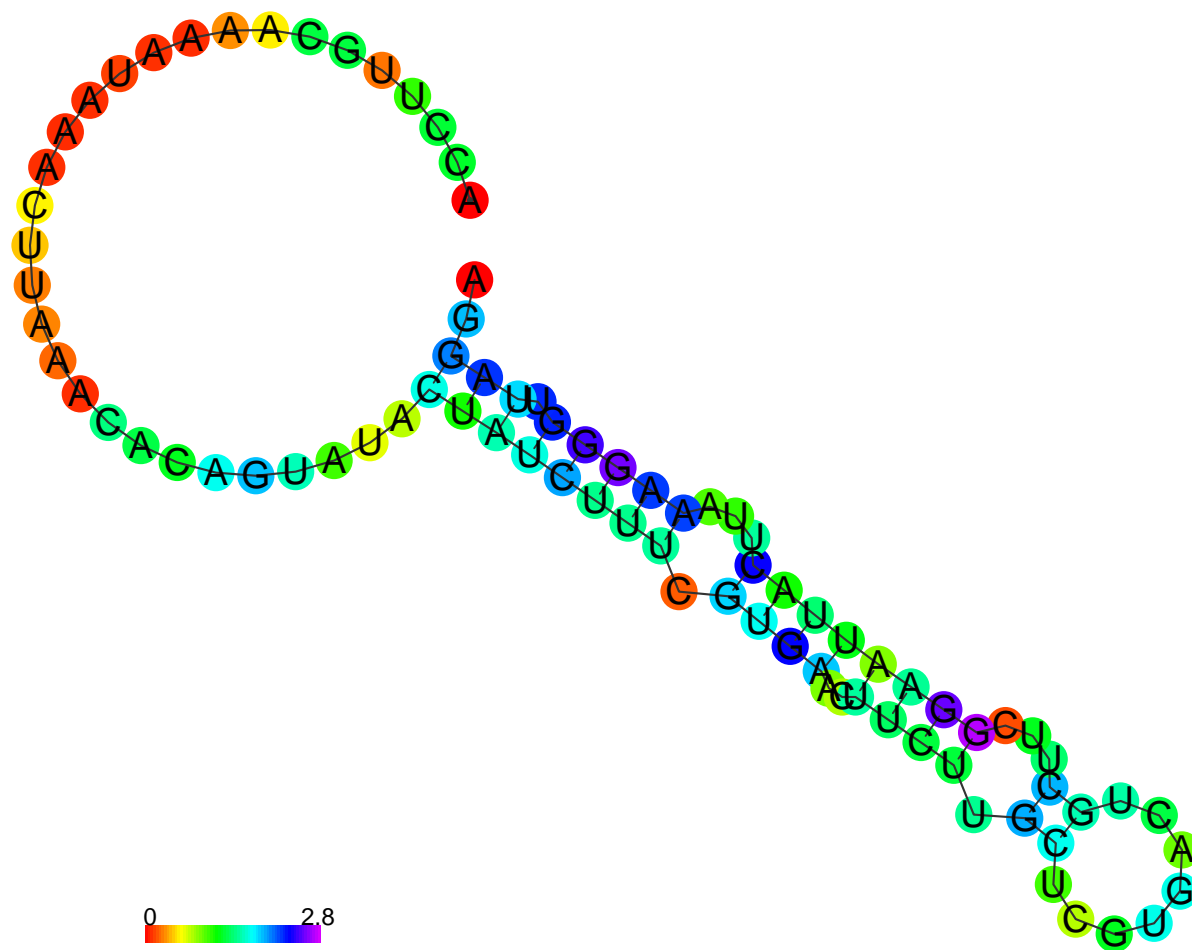

Supplement: Supplementary file 199 [file supplementary]

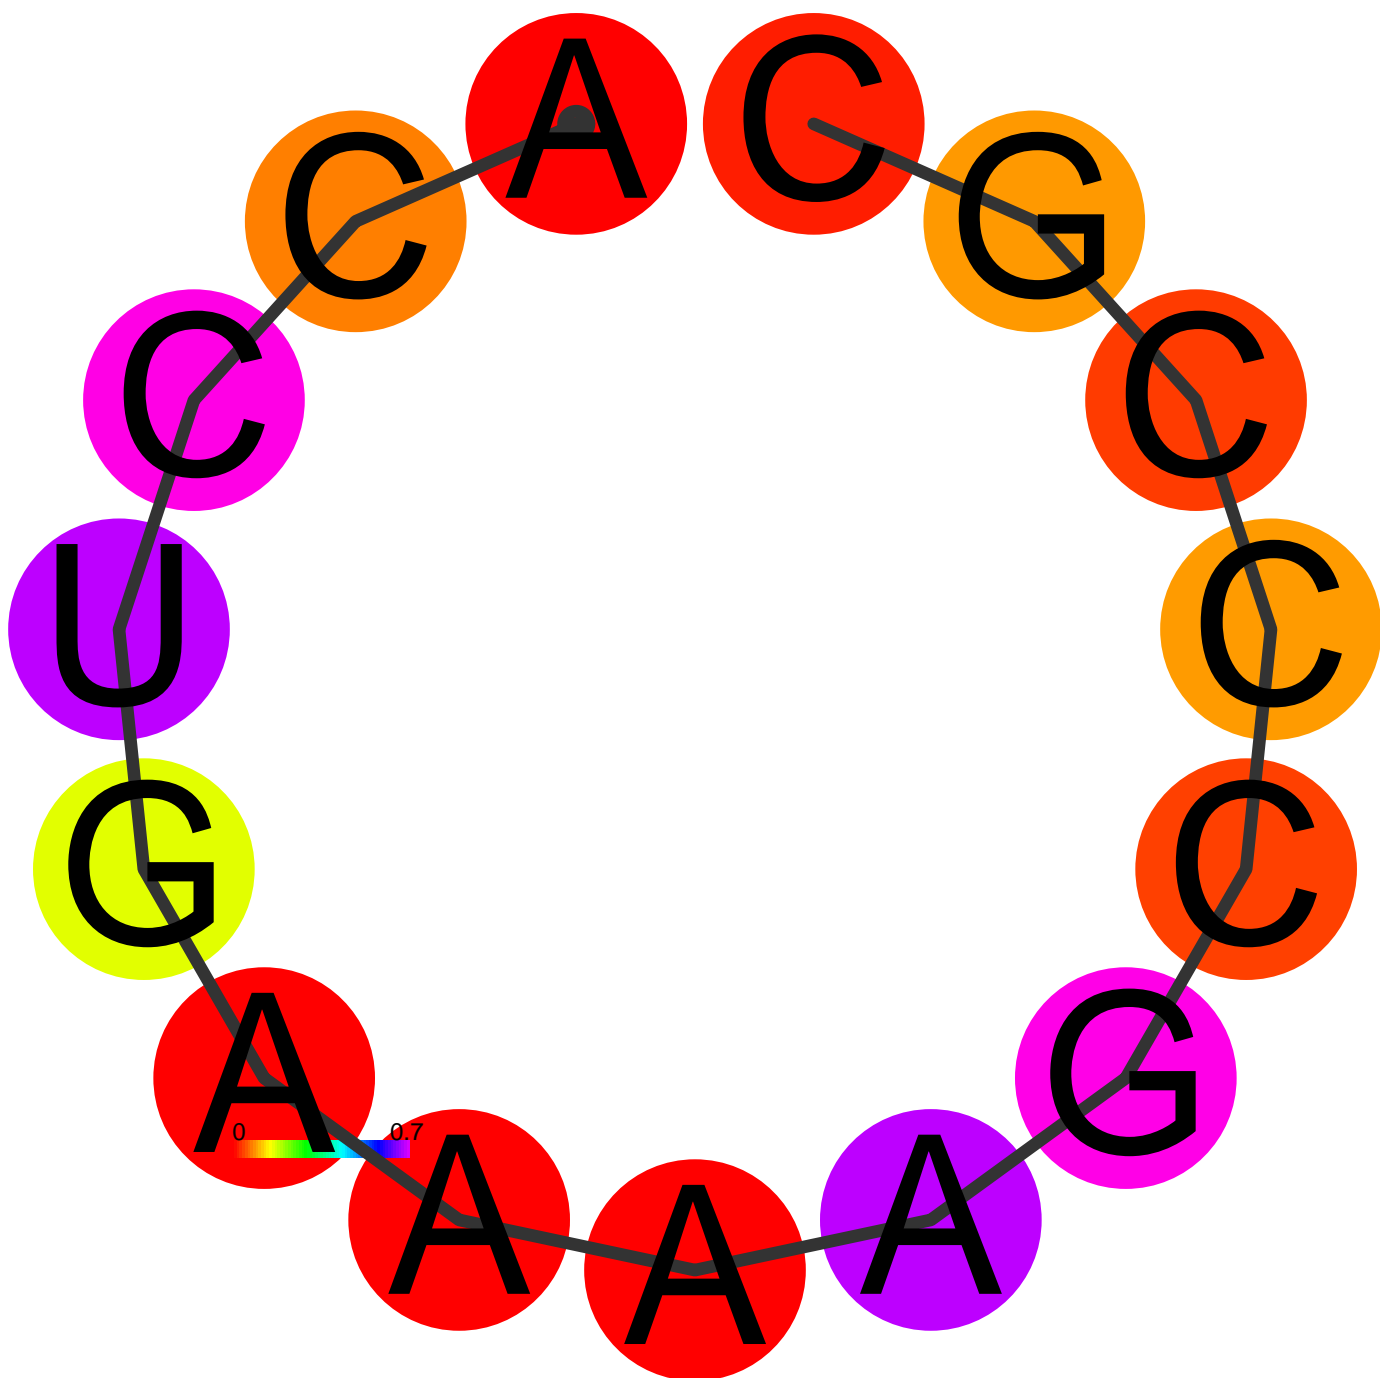

Supplement: Supplementary file 200 [file supplementary]
