# Supplementary figures and images for: Understanding the Effect of Different Glucose Concentrations in the Oligotrophic Bacterium Bacillus subtilis BS-G1 through Transcriptomics Analysis (part 3 of 6)
Source: Preprints.org preprint supplement (doi:10.20944/preprints202308.1891.v1), 2023-08-29

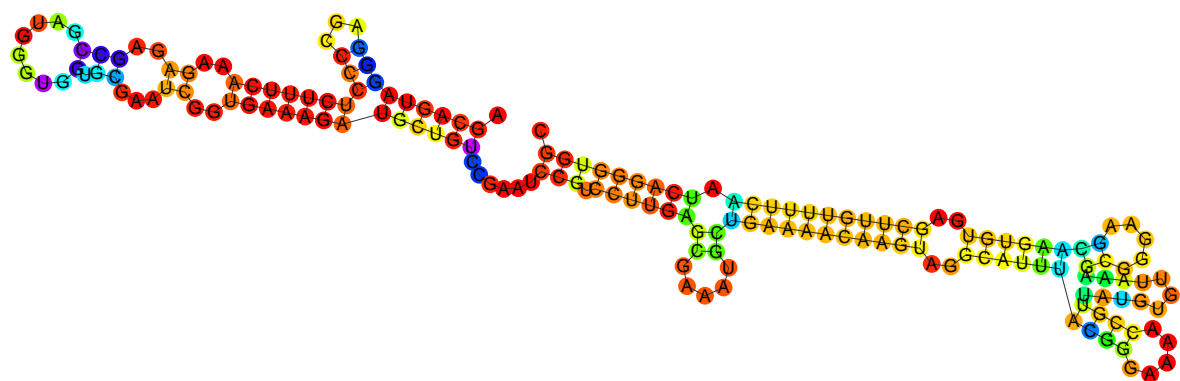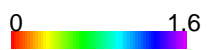

Supplement: Supplementary file 201 [file supplementary]

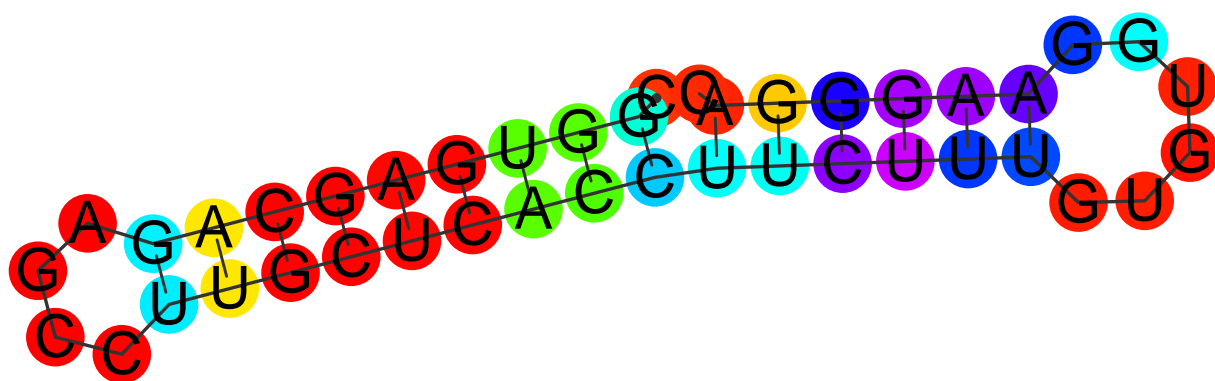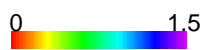

Supplement: Supplementary file 202 [file supplementary]

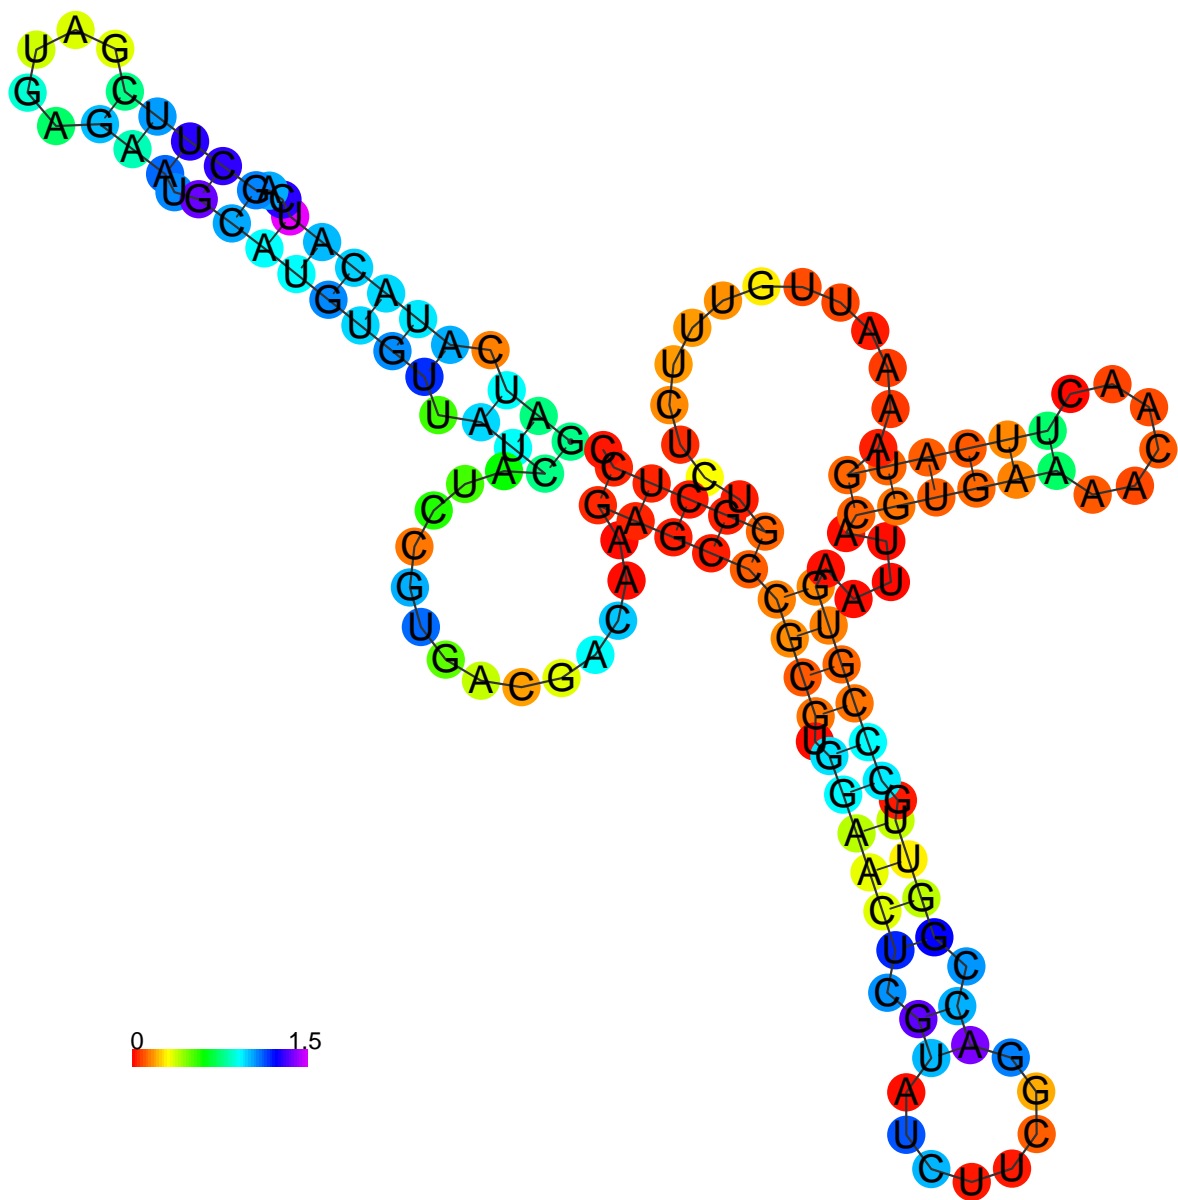

Supplement: Supplementary file 203 [file supplementary]

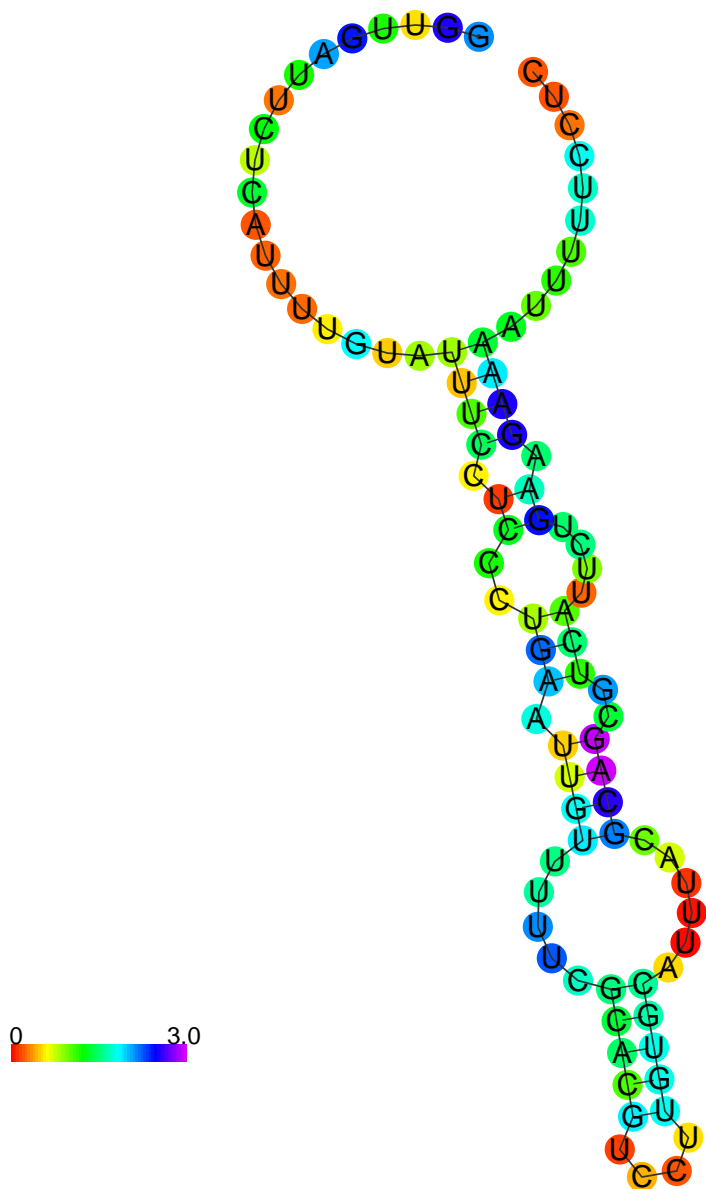

Supplement: Supplementary file 204 [file supplementary]

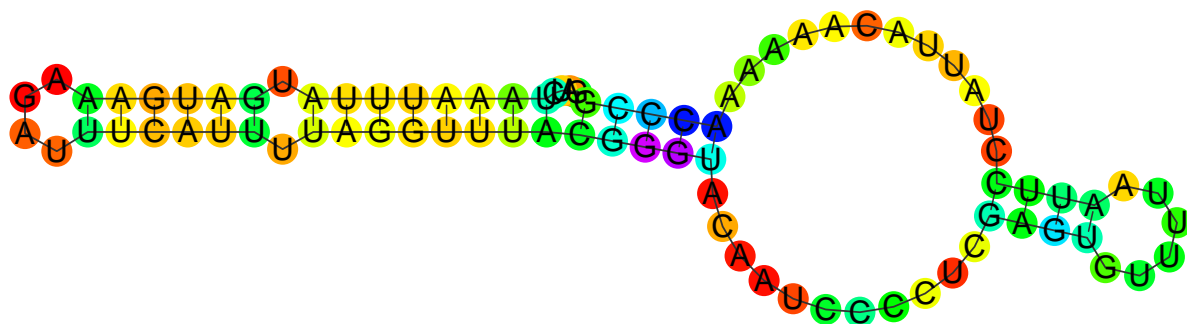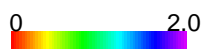

Supplement: Supplementary file 205 [file supplementary]

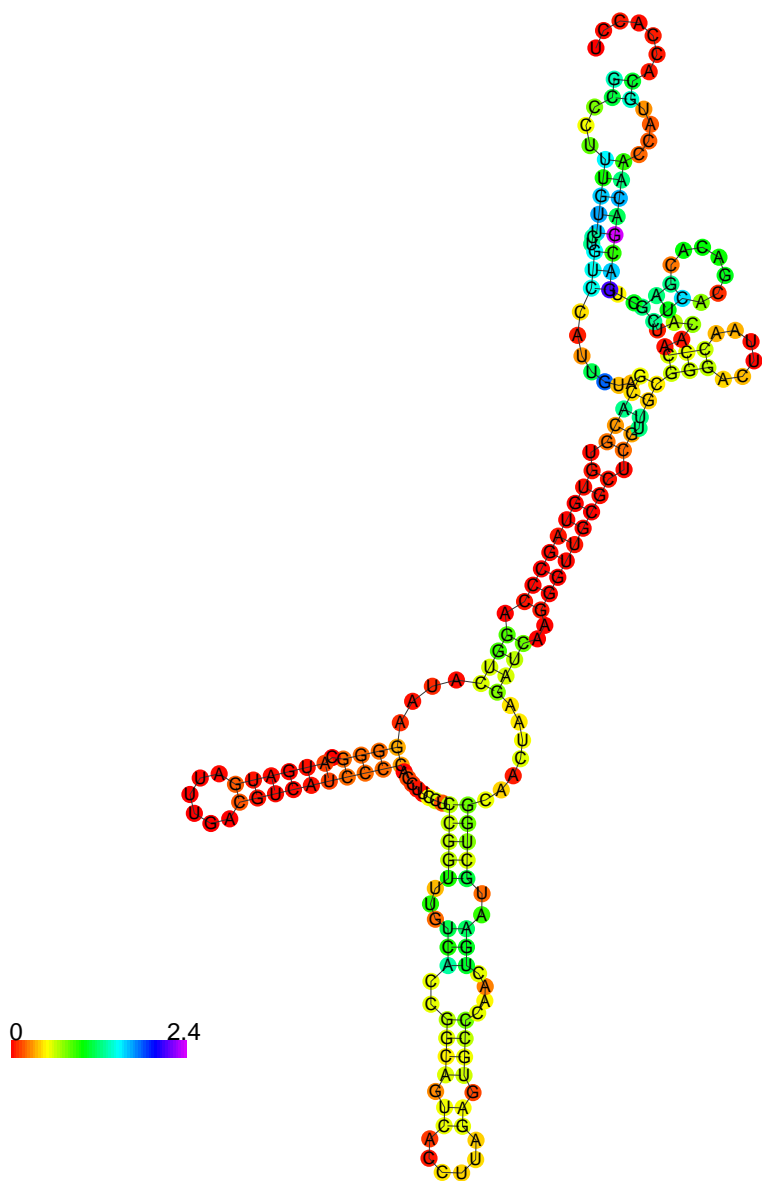

Supplement: Supplementary file 206 [file supplementary]

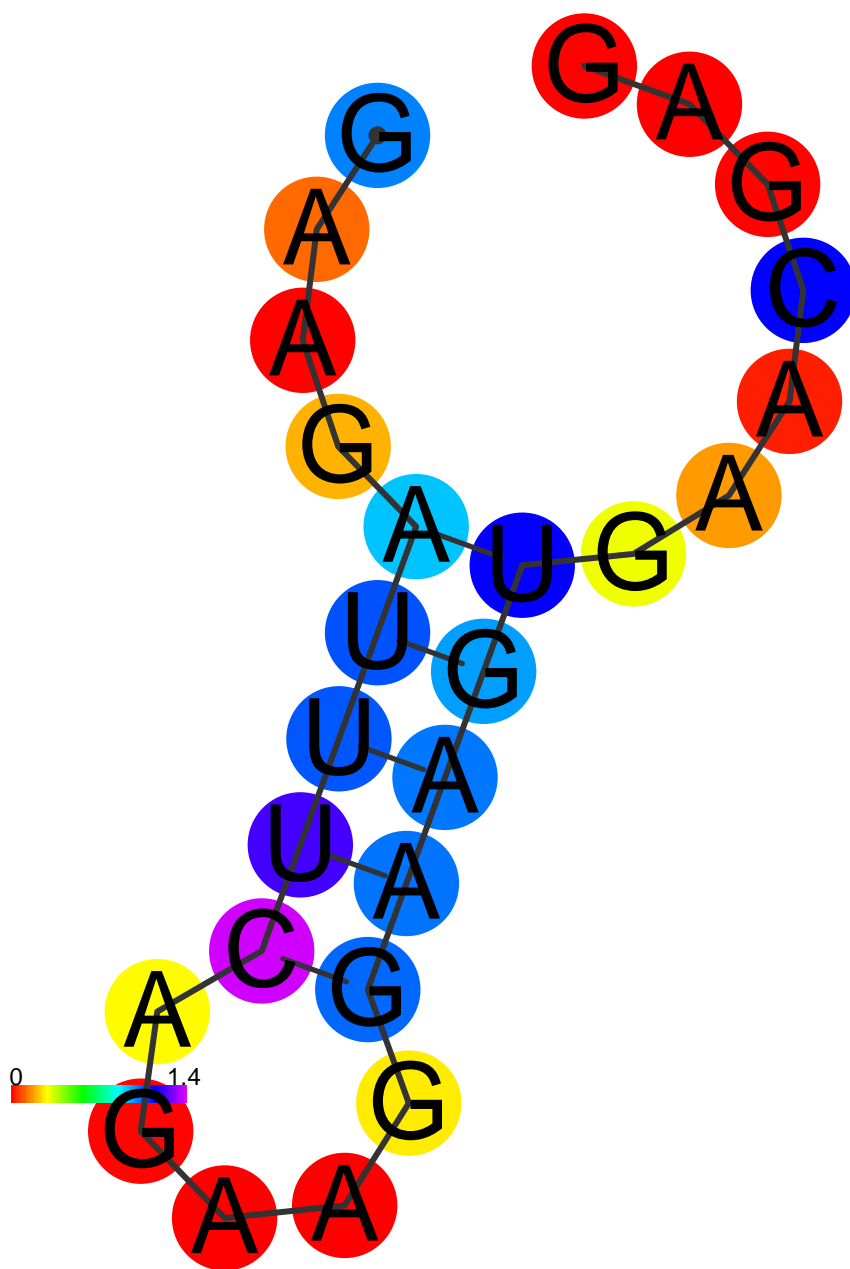

Supplement: Supplementary file 207 [file supplementary]

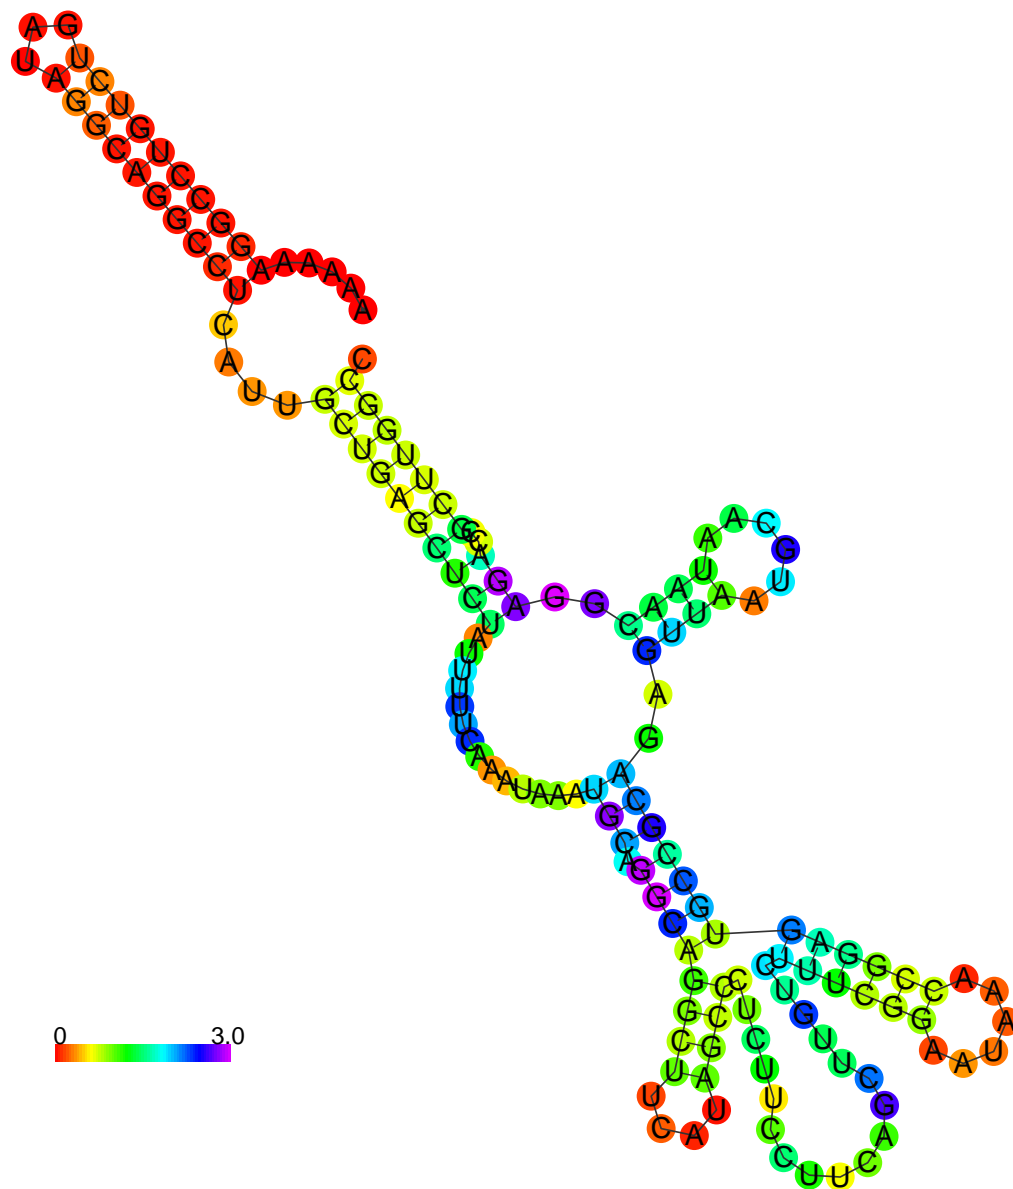

Supplement: Supplementary file 208 [file supplementary]

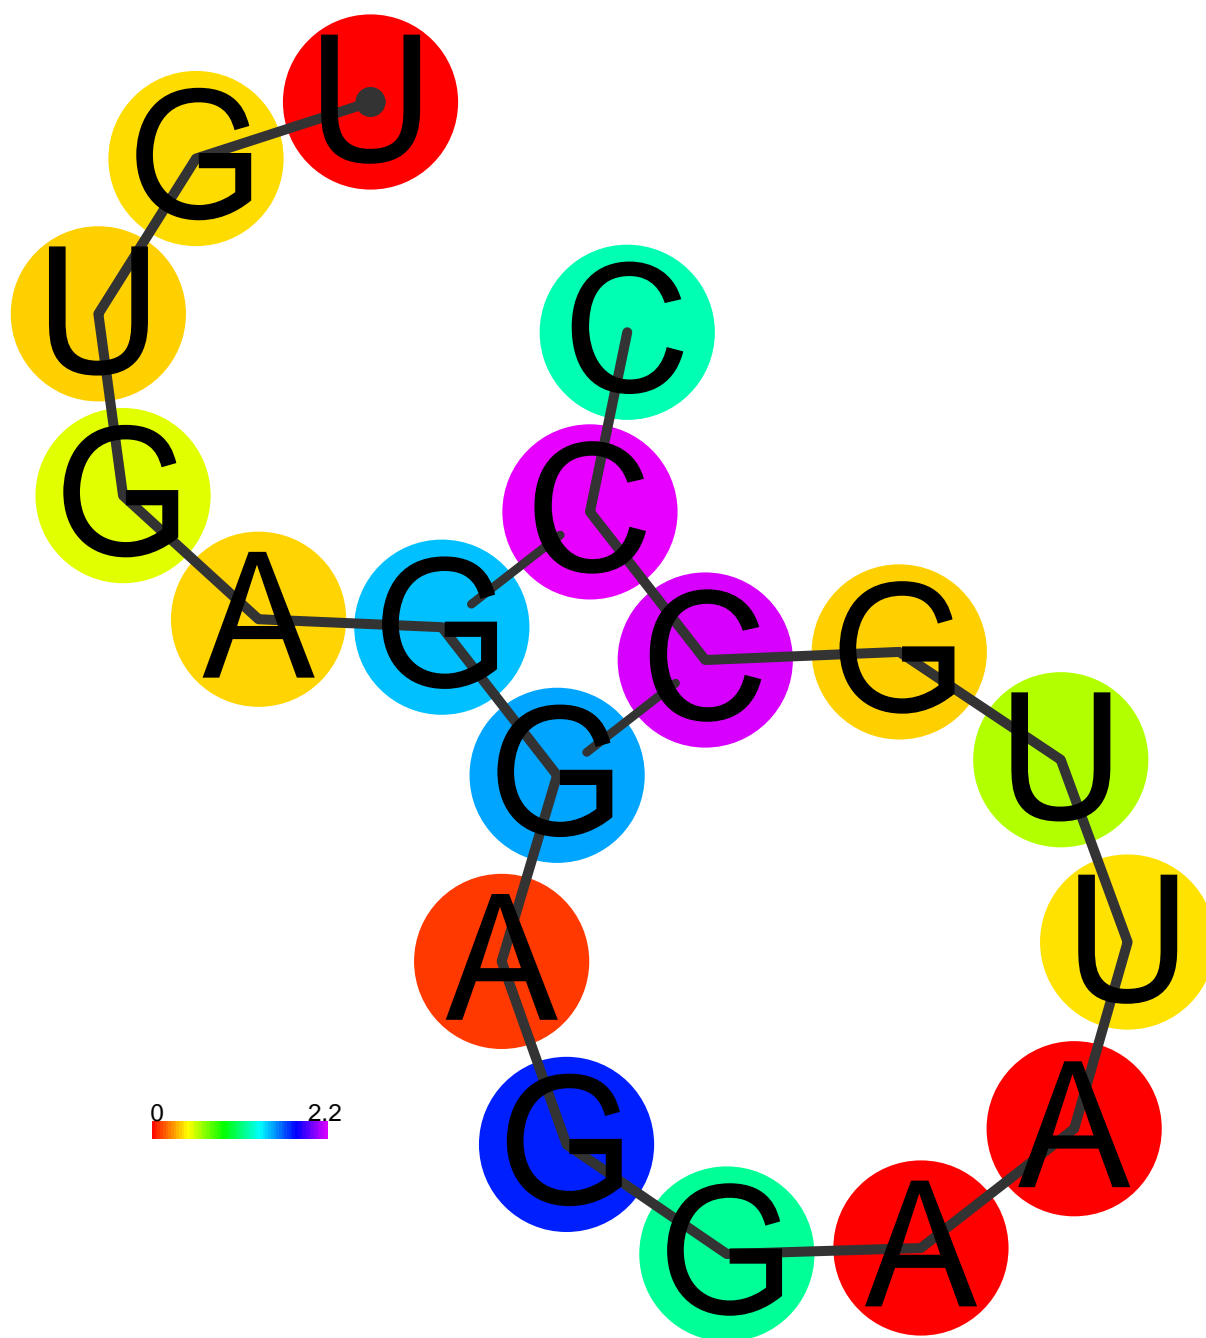

Supplement: Supplementary file 209 [file supplementary]

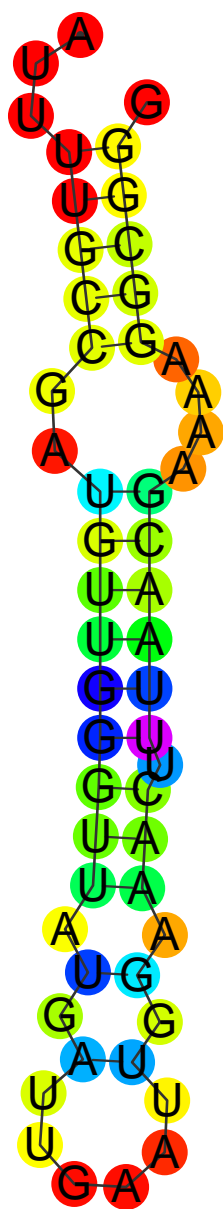

Supplement: Supplementary file 210 [file supplementary]

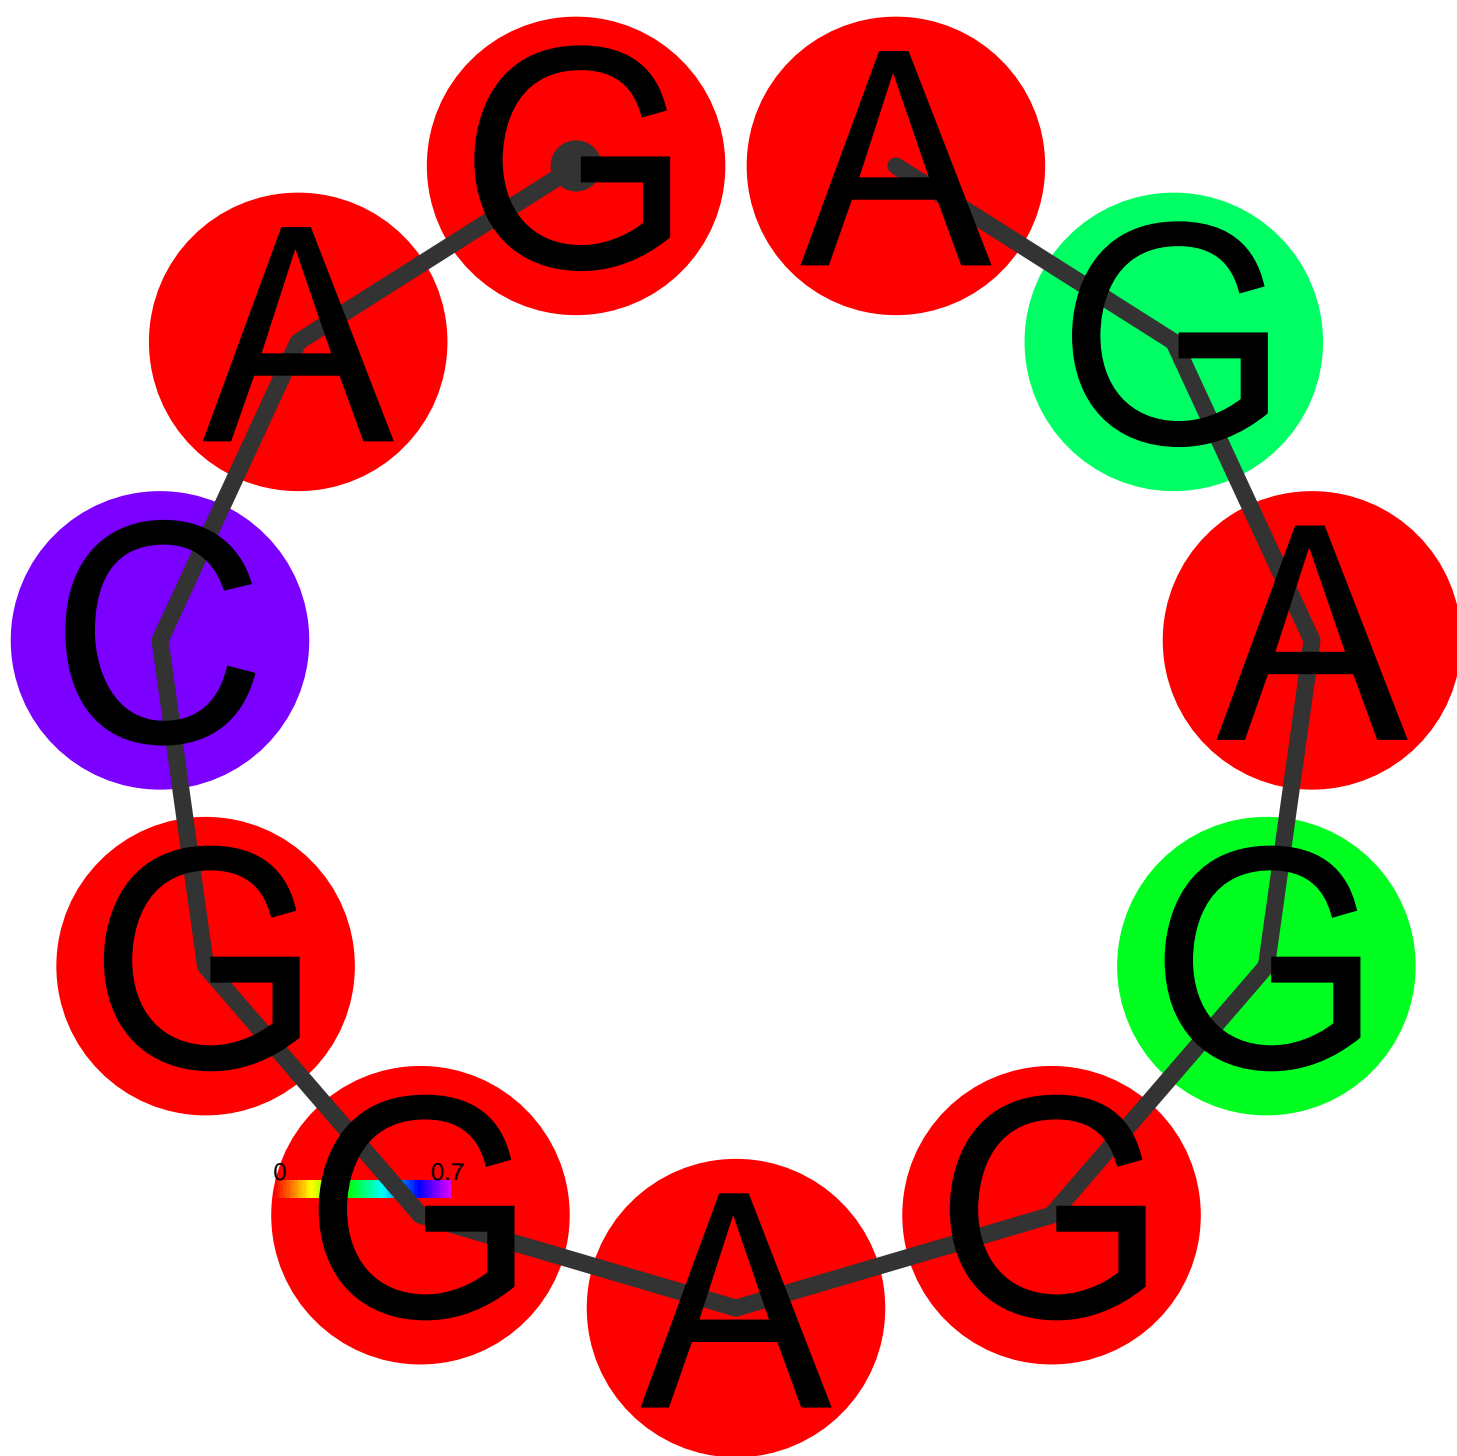

Supplement: Supplementary file 211 [file supplementary]

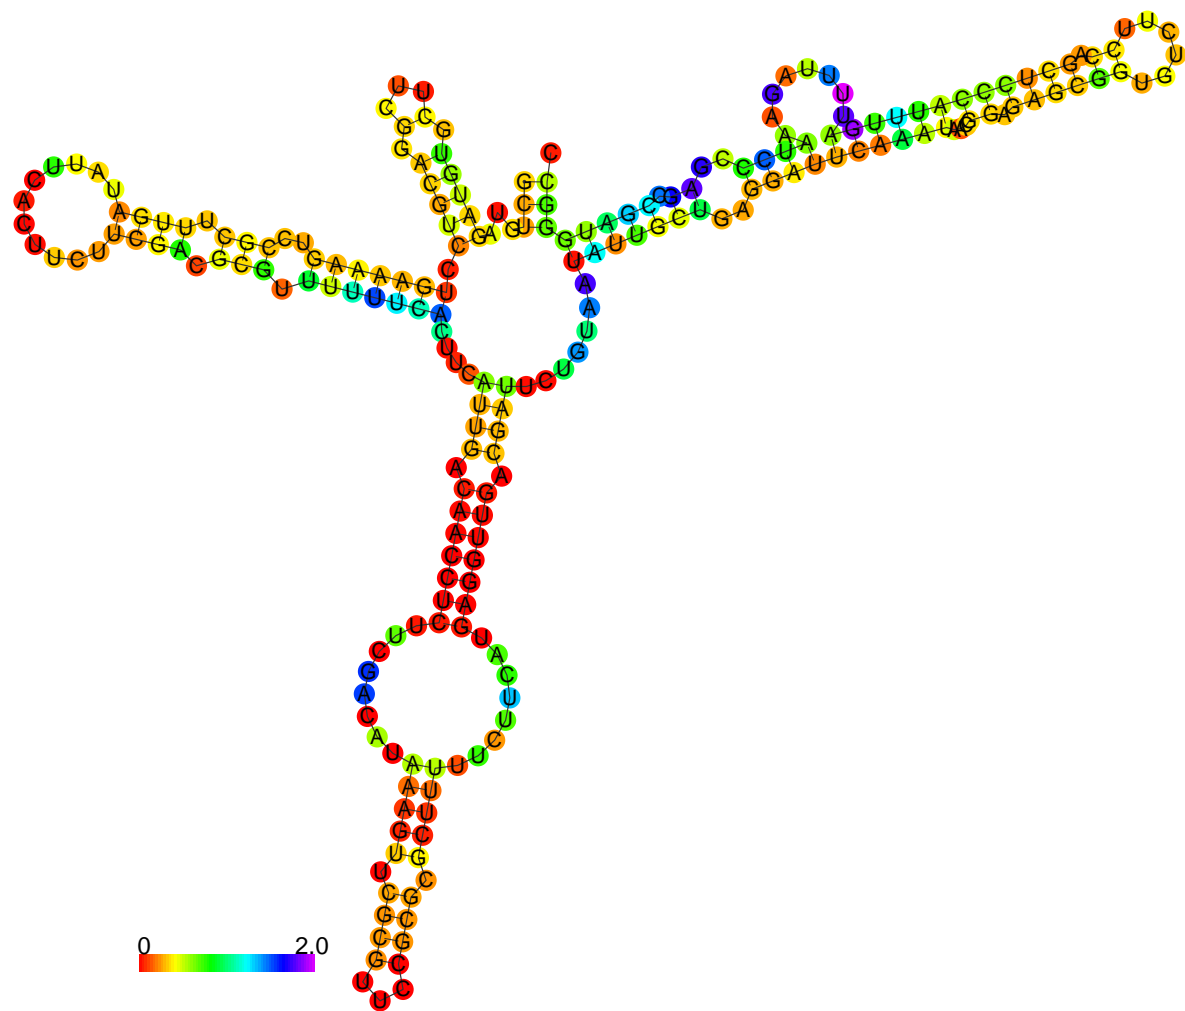

Supplement: Supplementary file 212 [file supplementary]

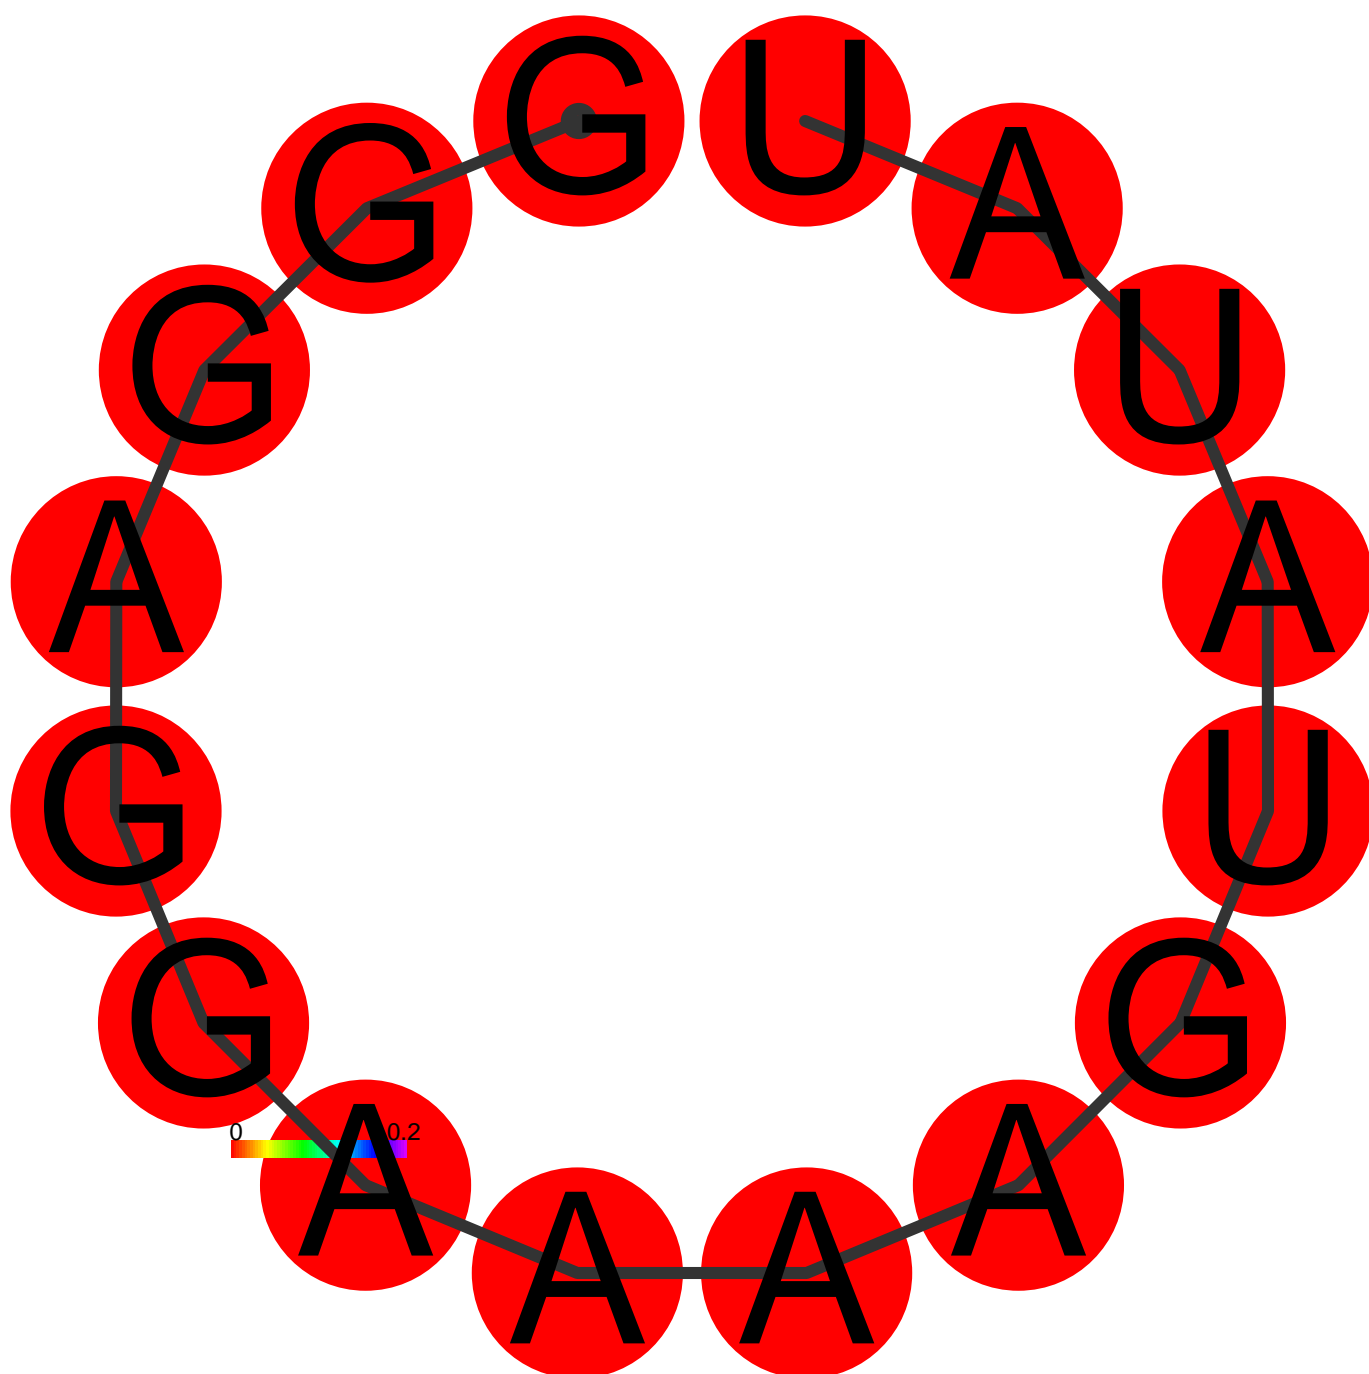

Supplement: Supplementary file 213 [file supplementary]

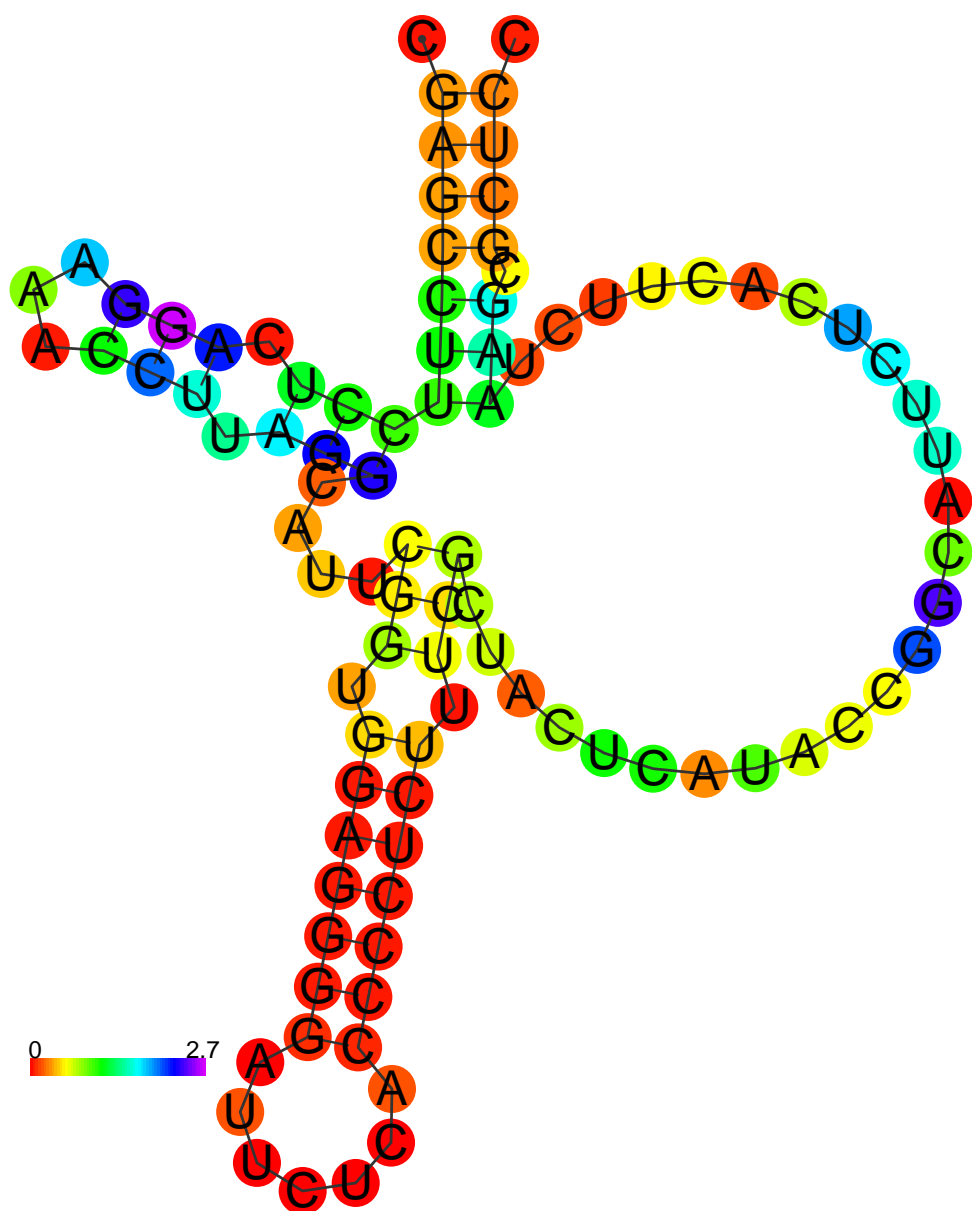

Supplement: Supplementary file 214 [file supplementary]

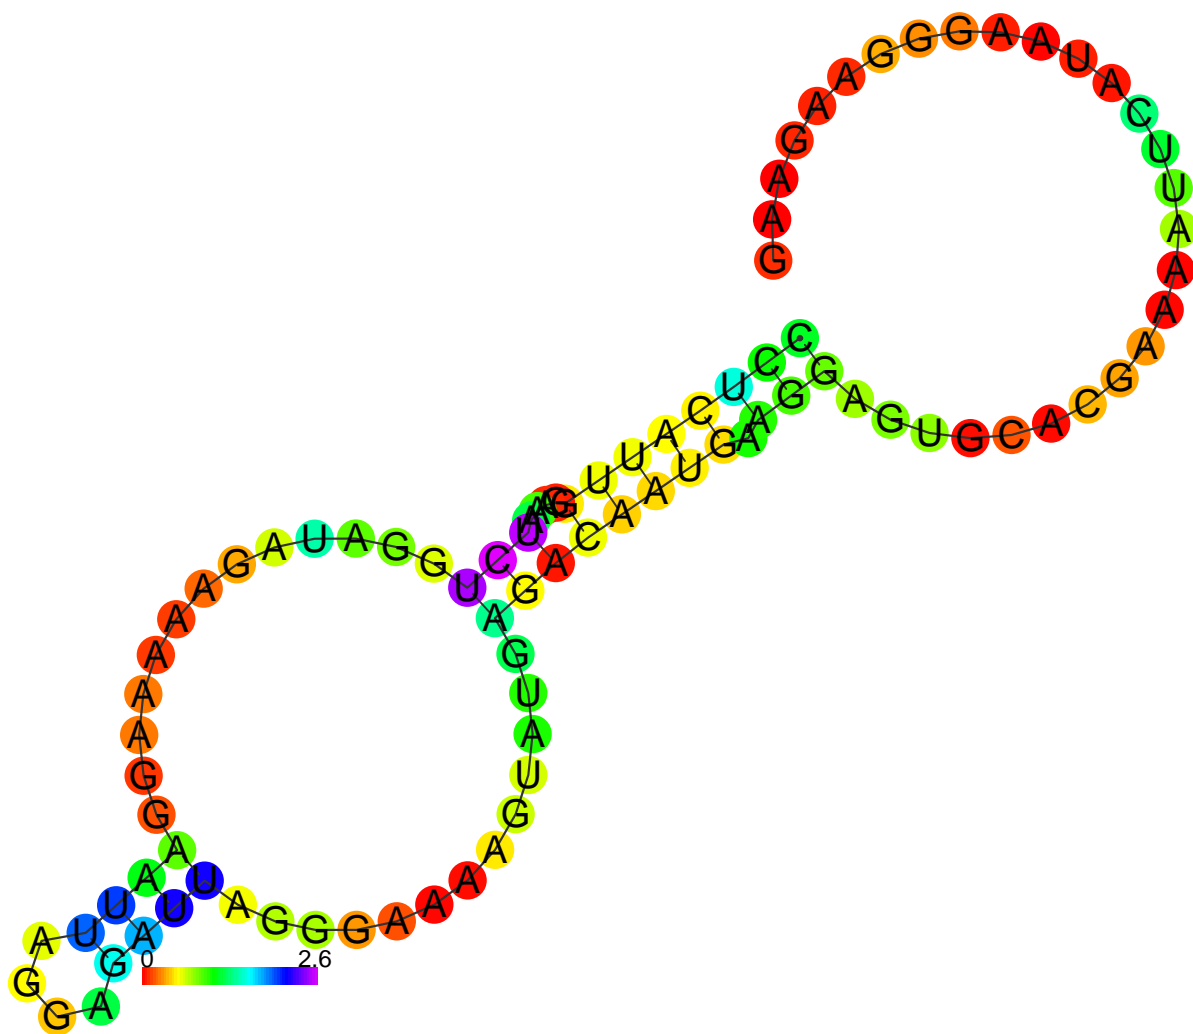

Supplement: Supplementary file 215 [file supplementary]

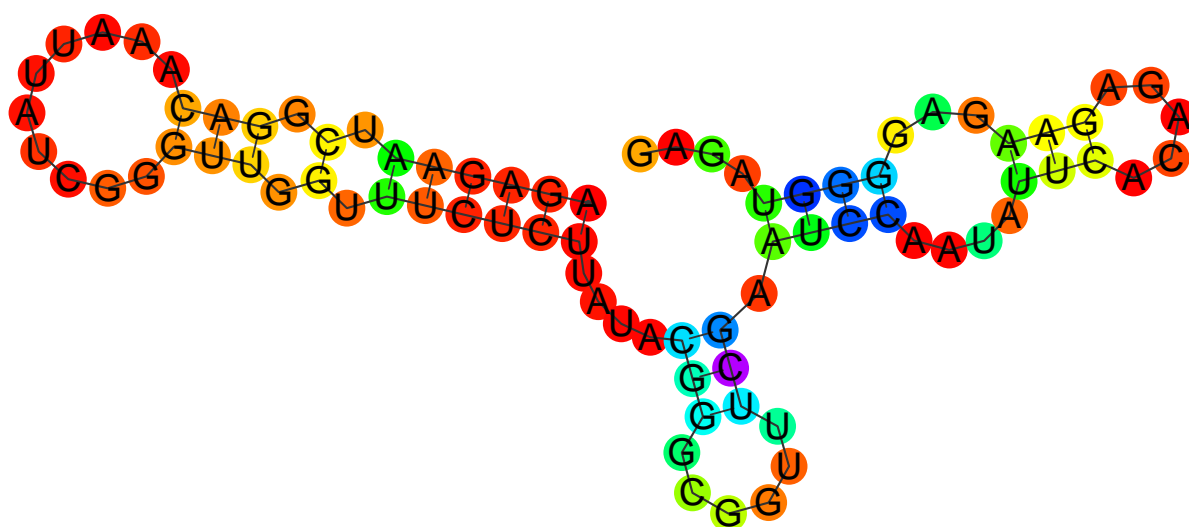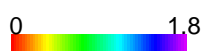

Supplement: Supplementary file 216 [file supplementary]

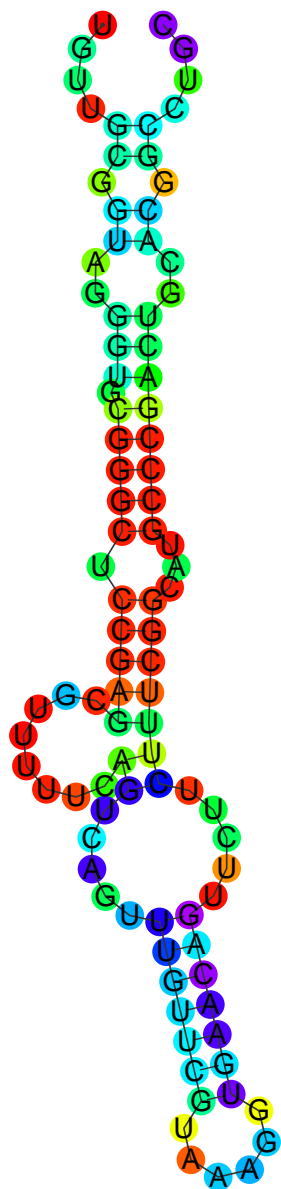

Supplement: Supplementary file 217 [file supplementary]

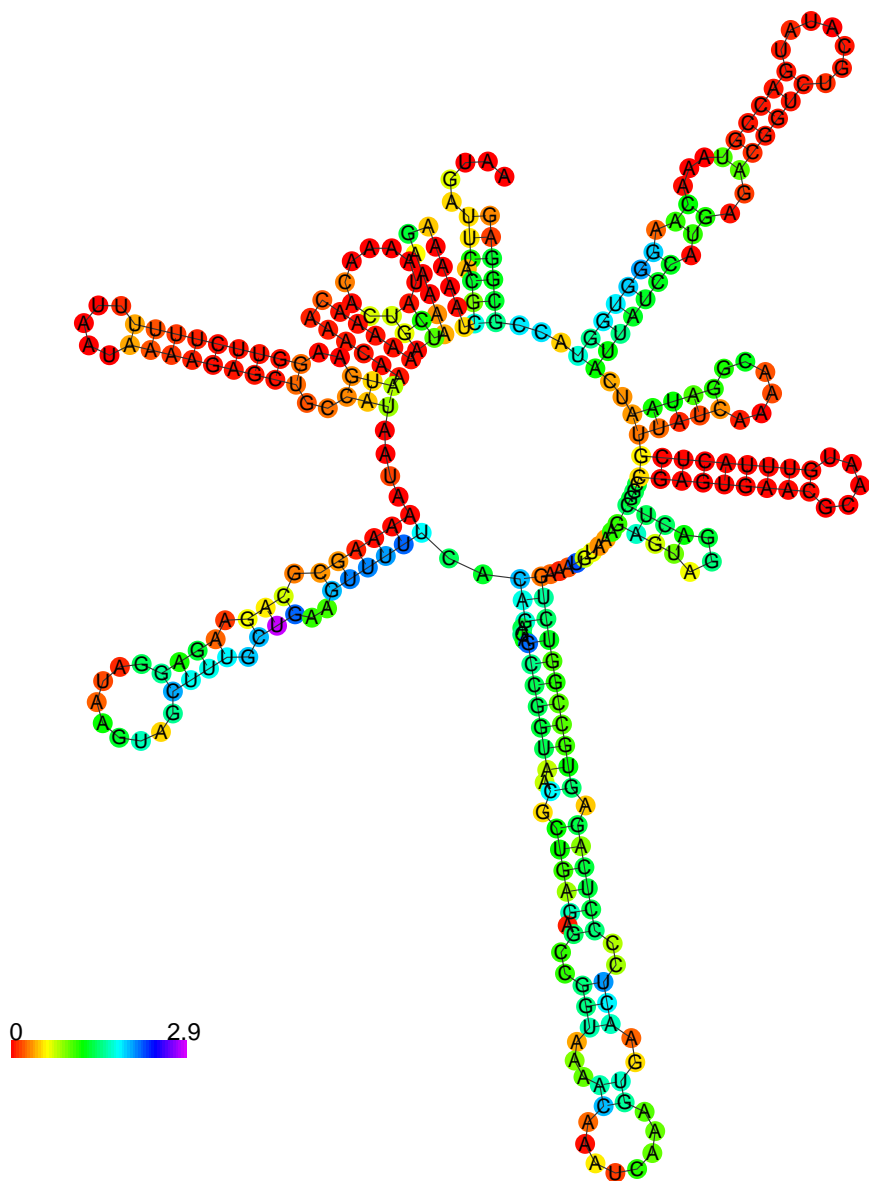

Supplement: Supplementary file 218 [file supplementary]

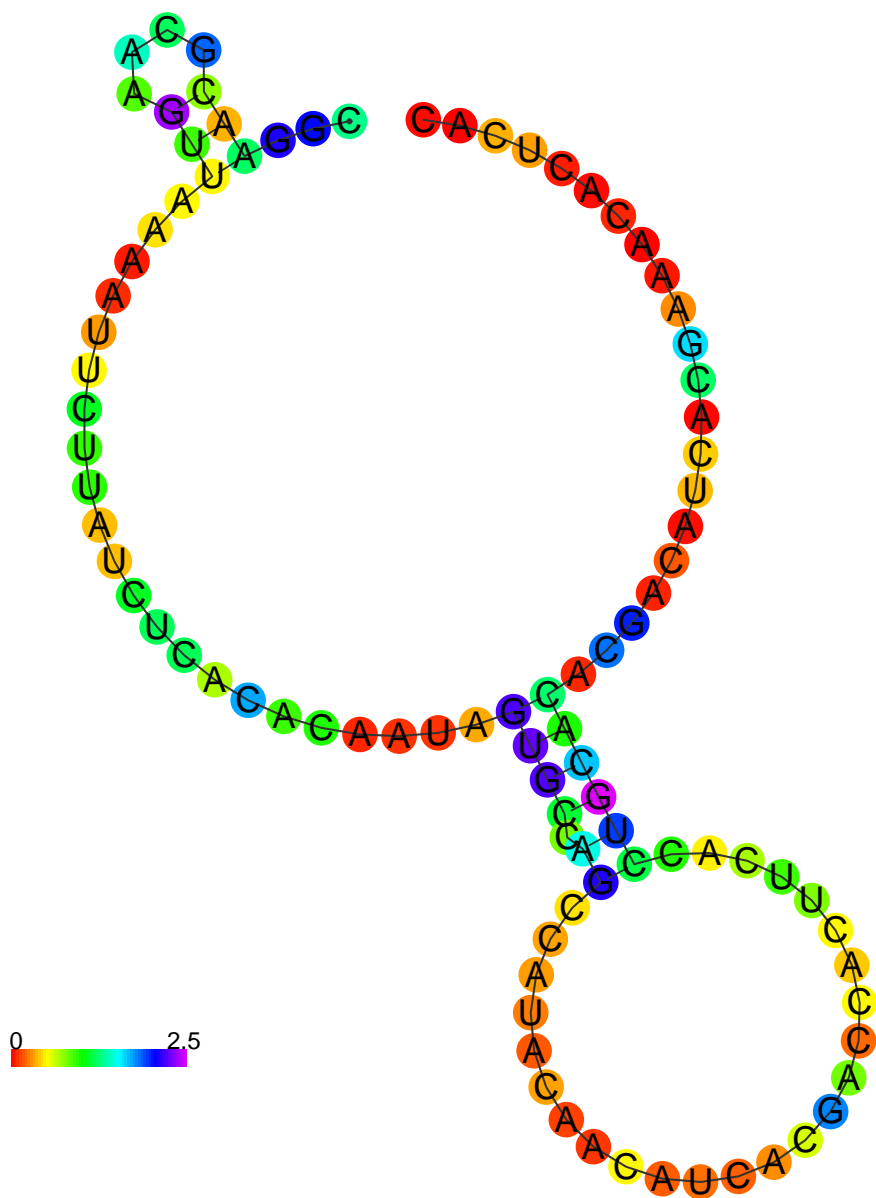

Supplement: Supplementary file 219 [file supplementary]

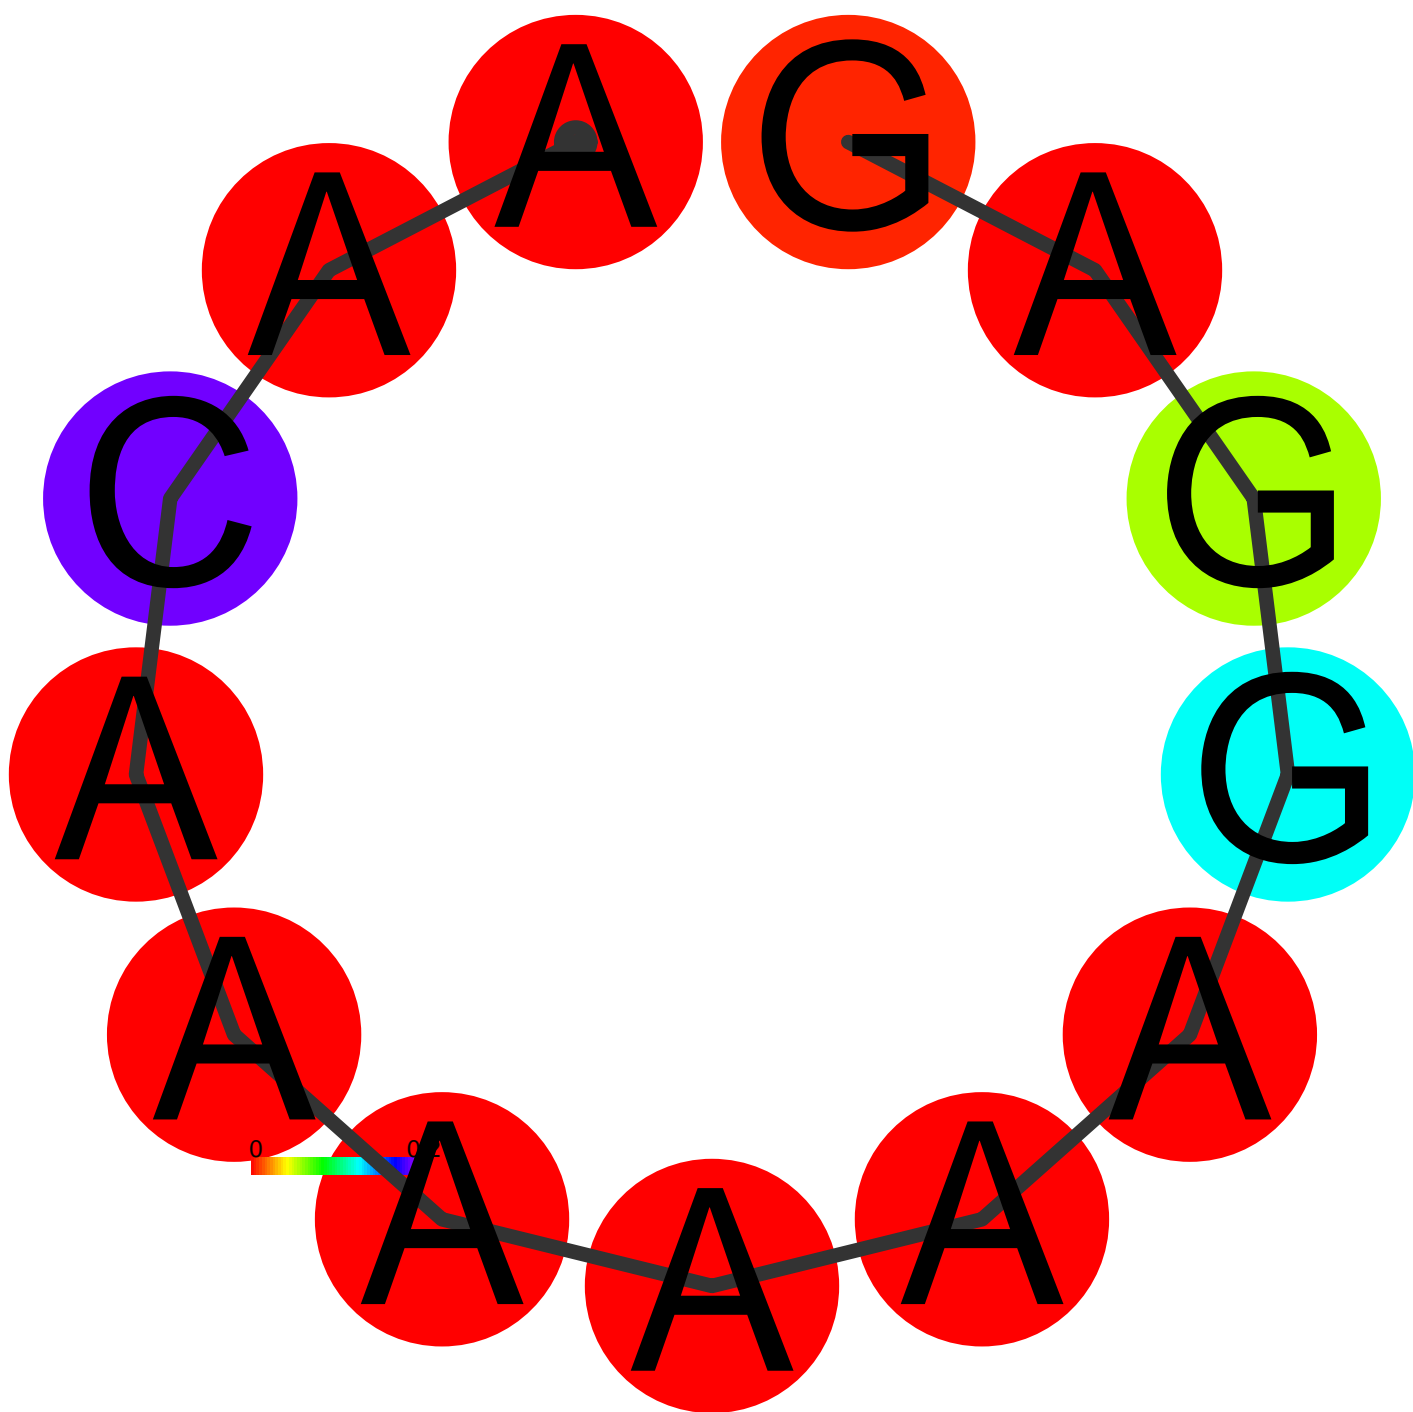

Supplement: Supplementary file 220 [file supplementary]

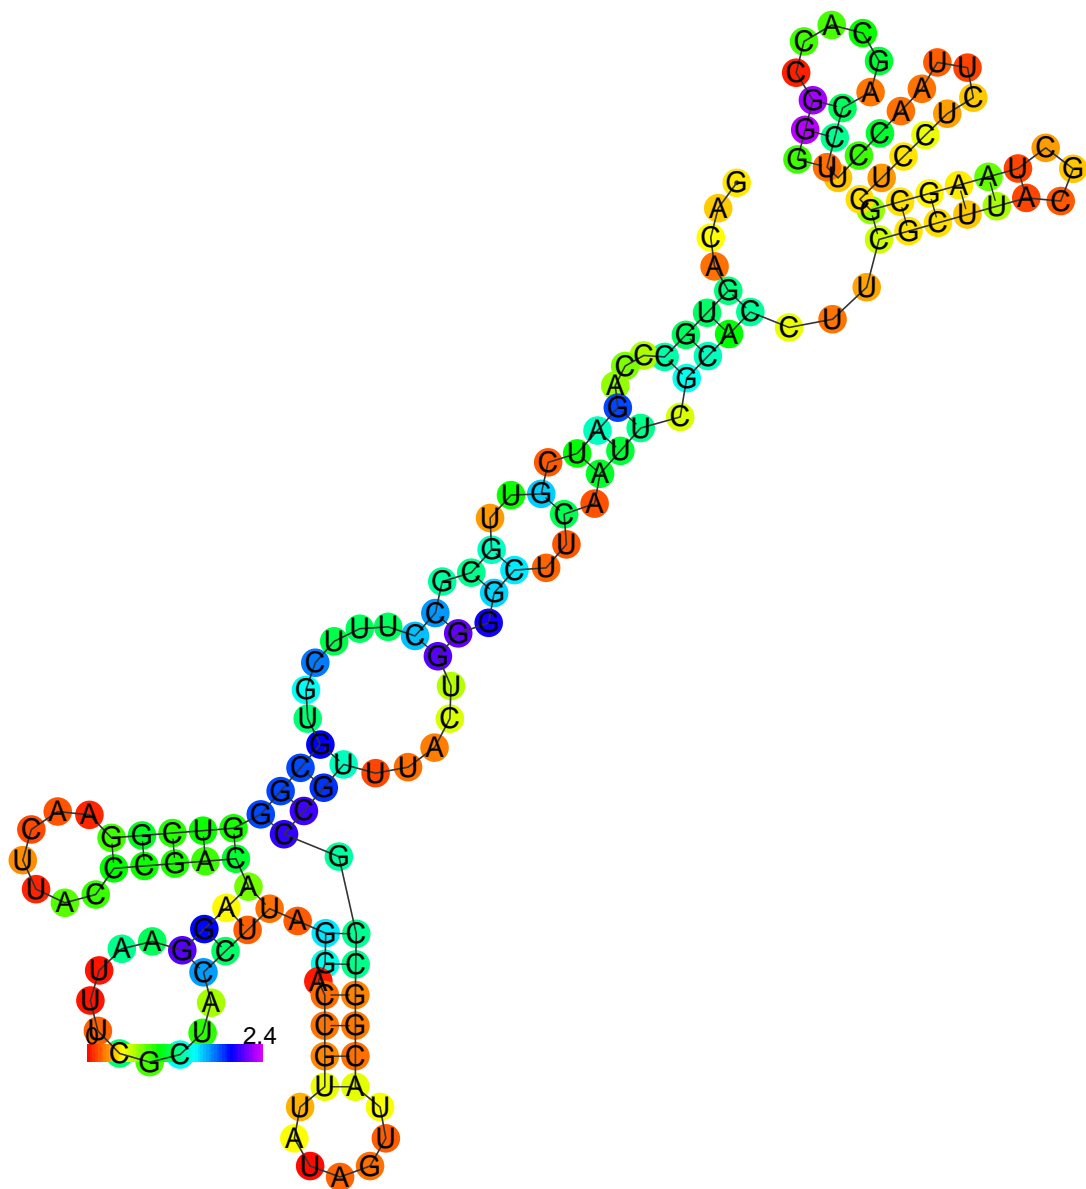

Supplement: Supplementary file 221 [file supplementary]

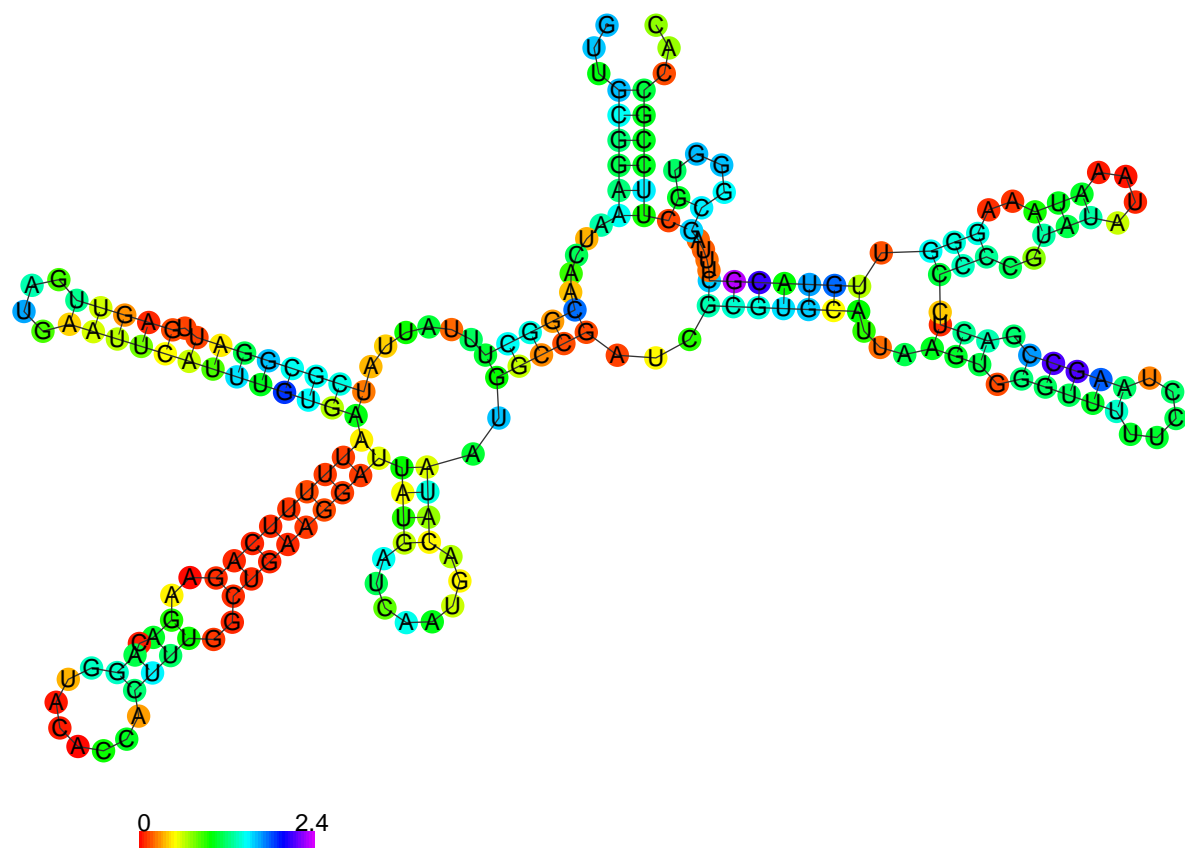

Supplement: Supplementary file 222 [file supplementary]

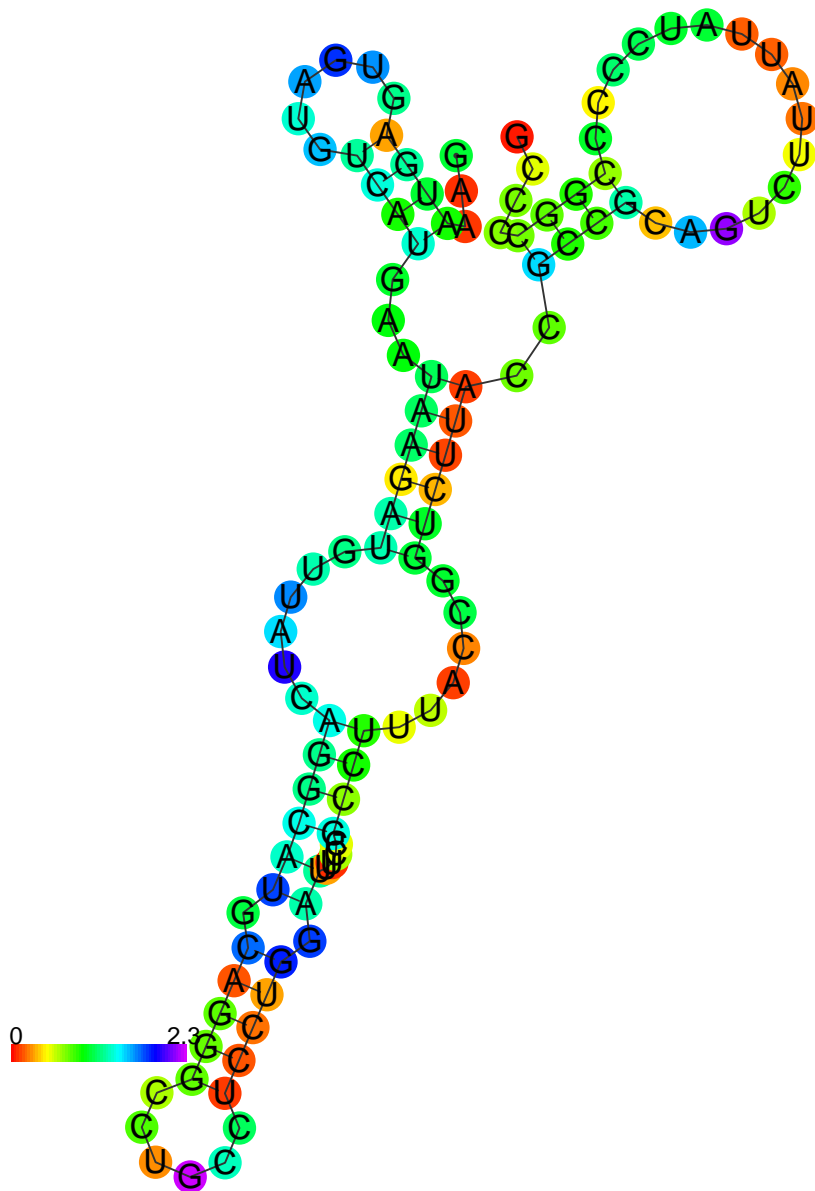

Supplement: Supplementary file 223 [file supplementary]

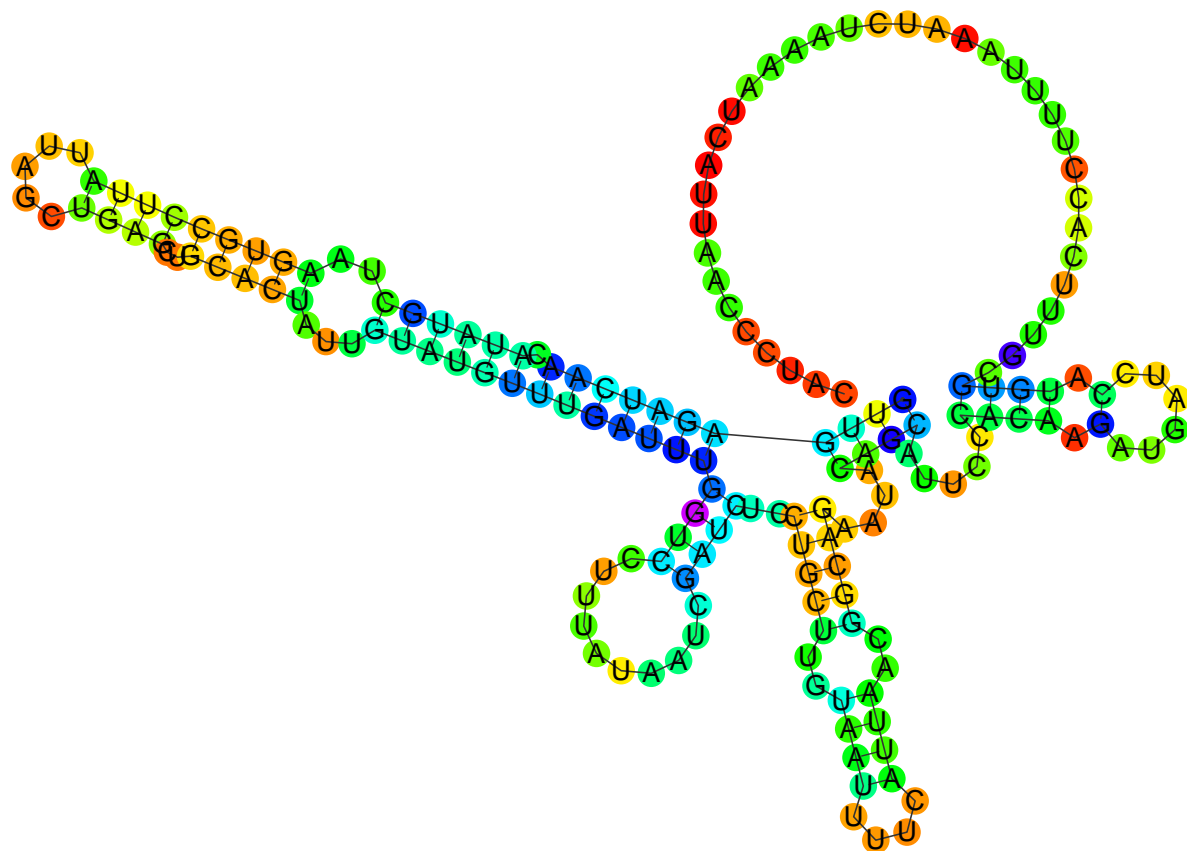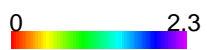

Supplement: Supplementary file 224 [file supplementary]

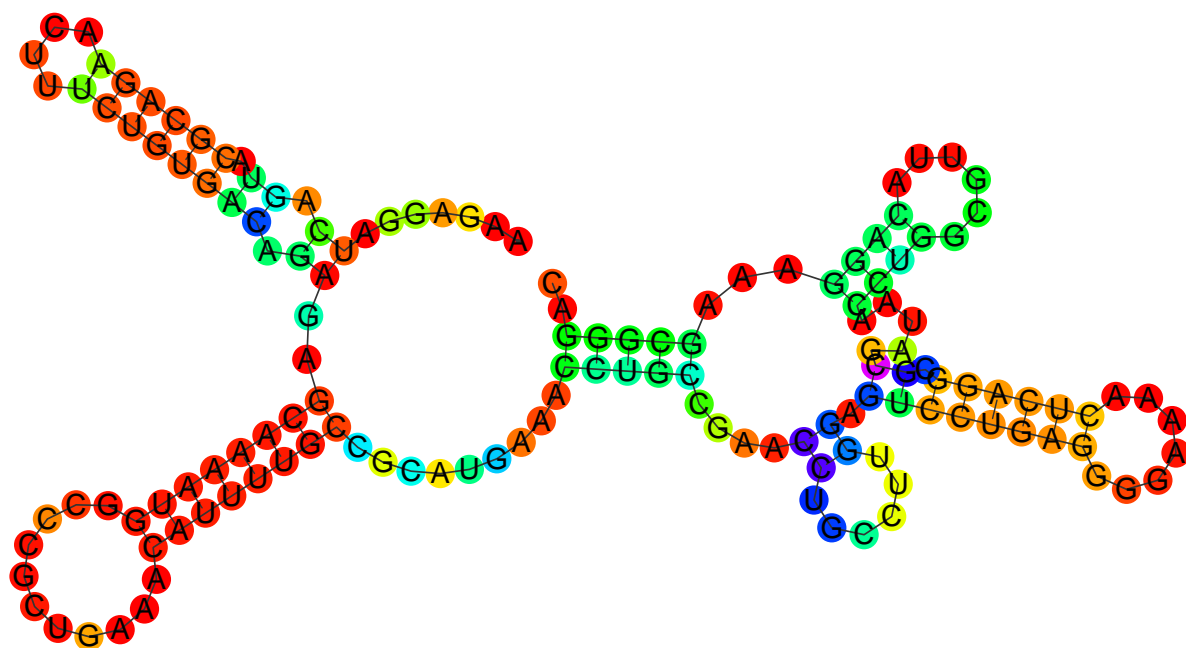

Supplement: Supplementary file 225 [file supplementary]

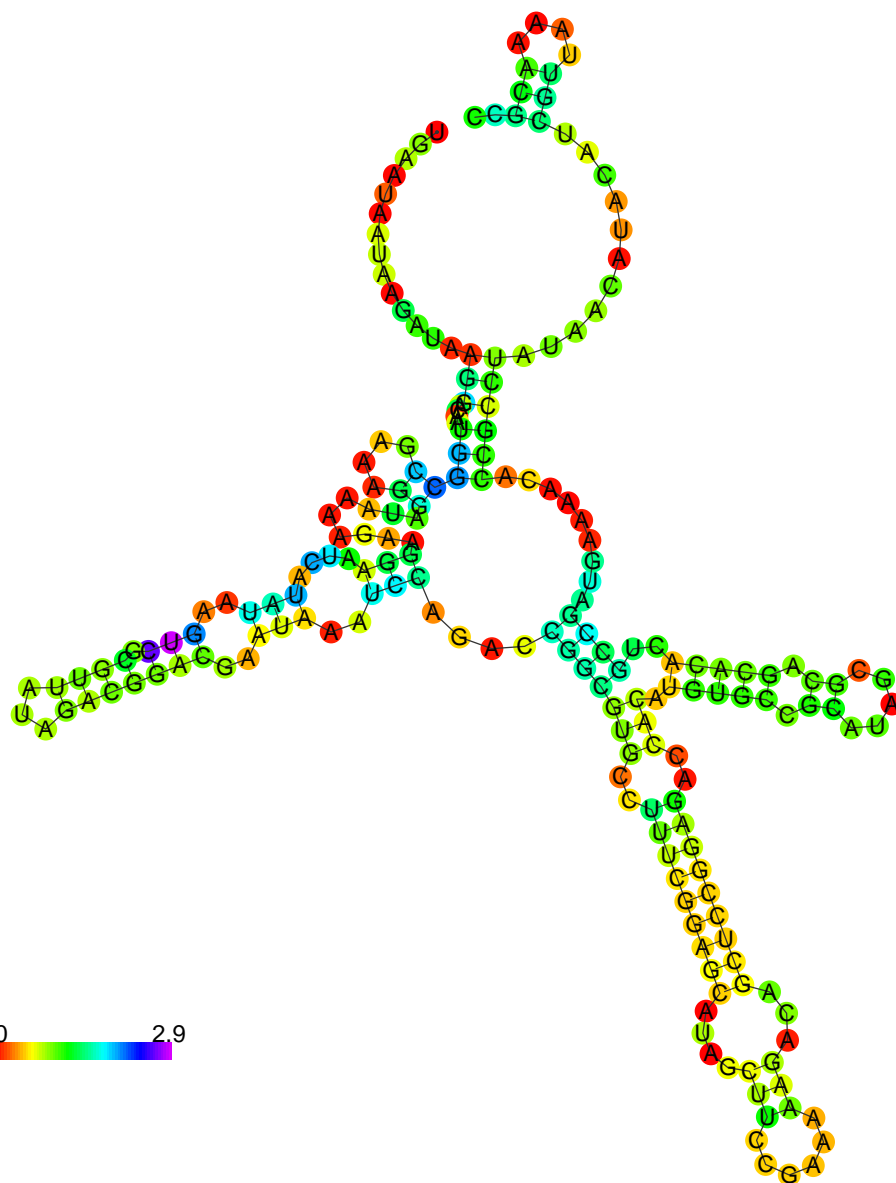

Supplement: Supplementary file 226 [file supplementary]

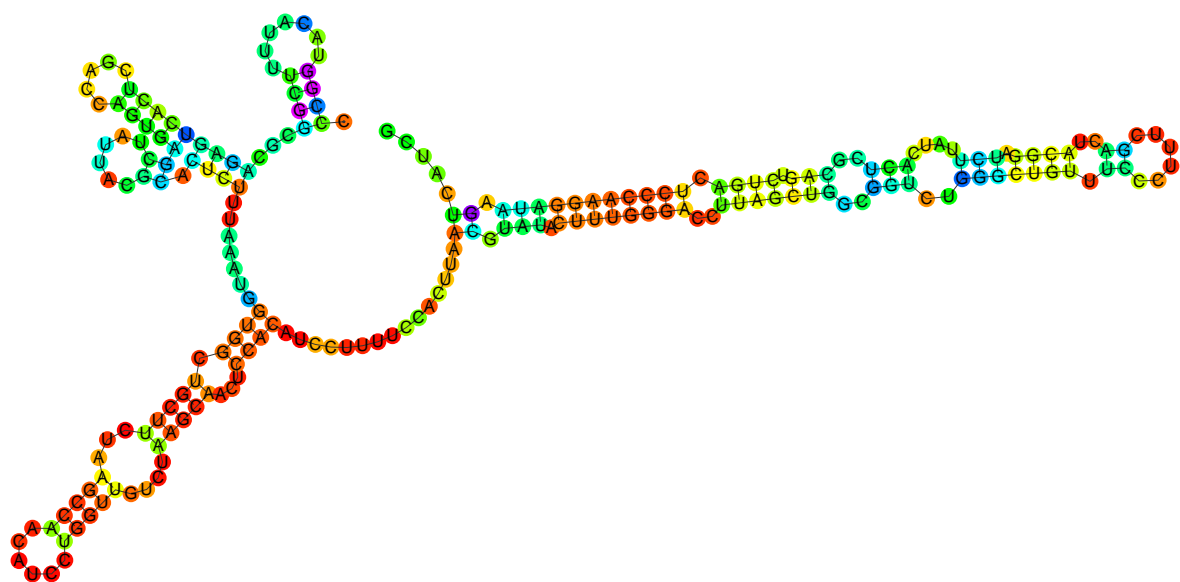

Supplement: Supplementary file 227 [file supplementary]

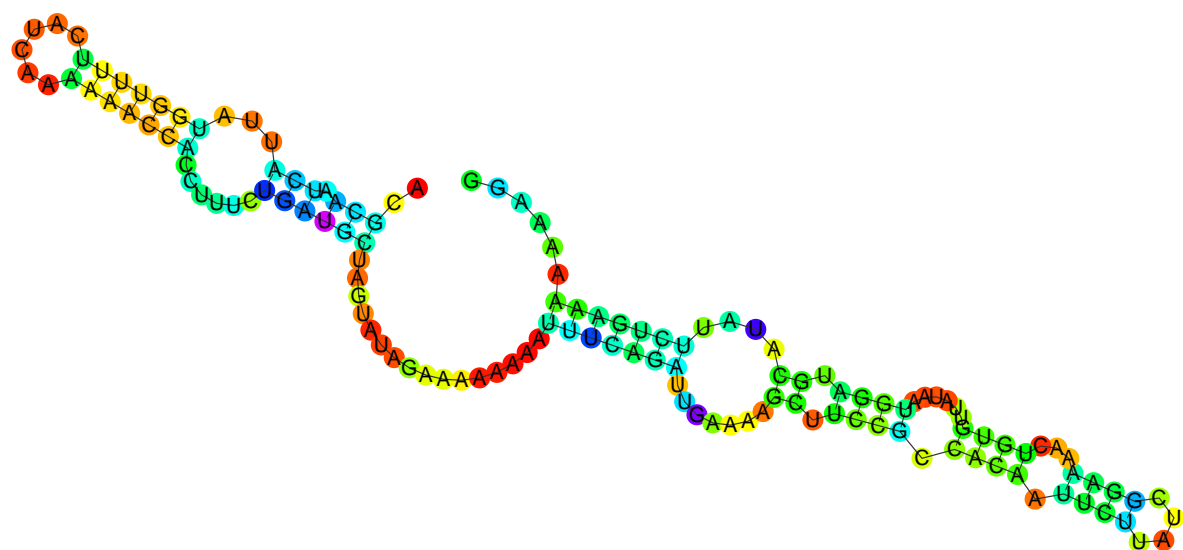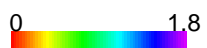

Supplement: Supplementary file 228 [file supplementary]



Supplement: Supplementary file 229 [file supplementary]

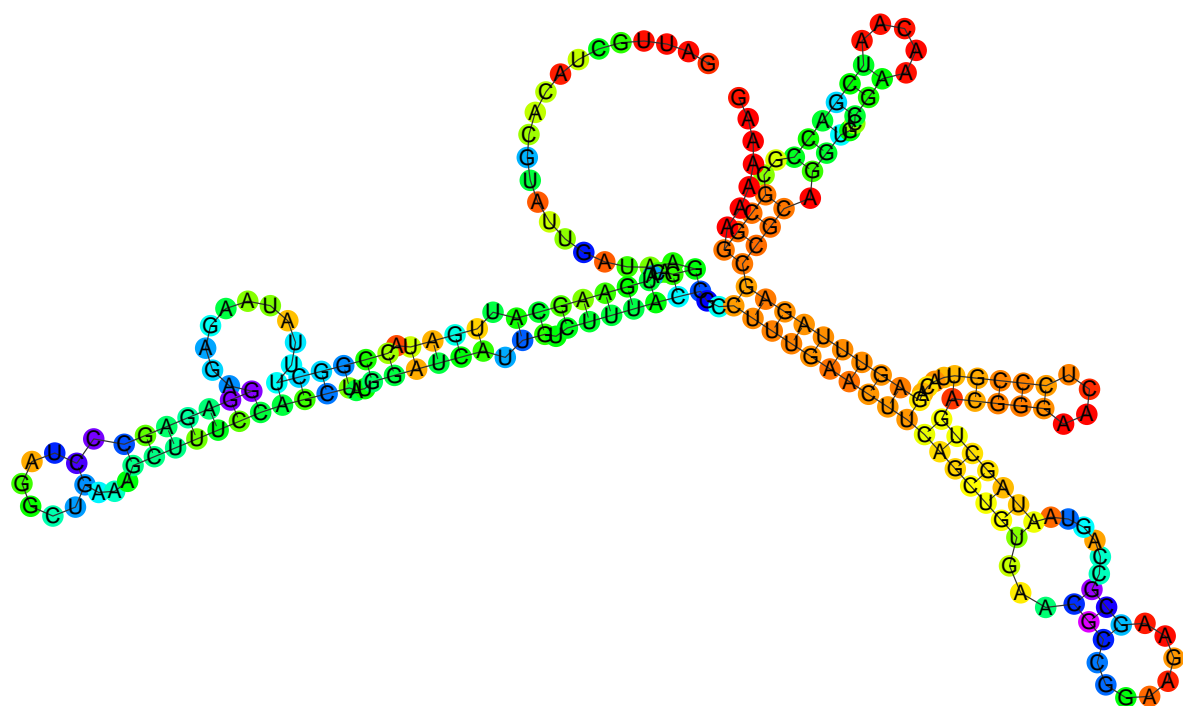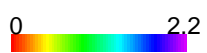

Supplement: Supplementary file 230 [file supplementary]

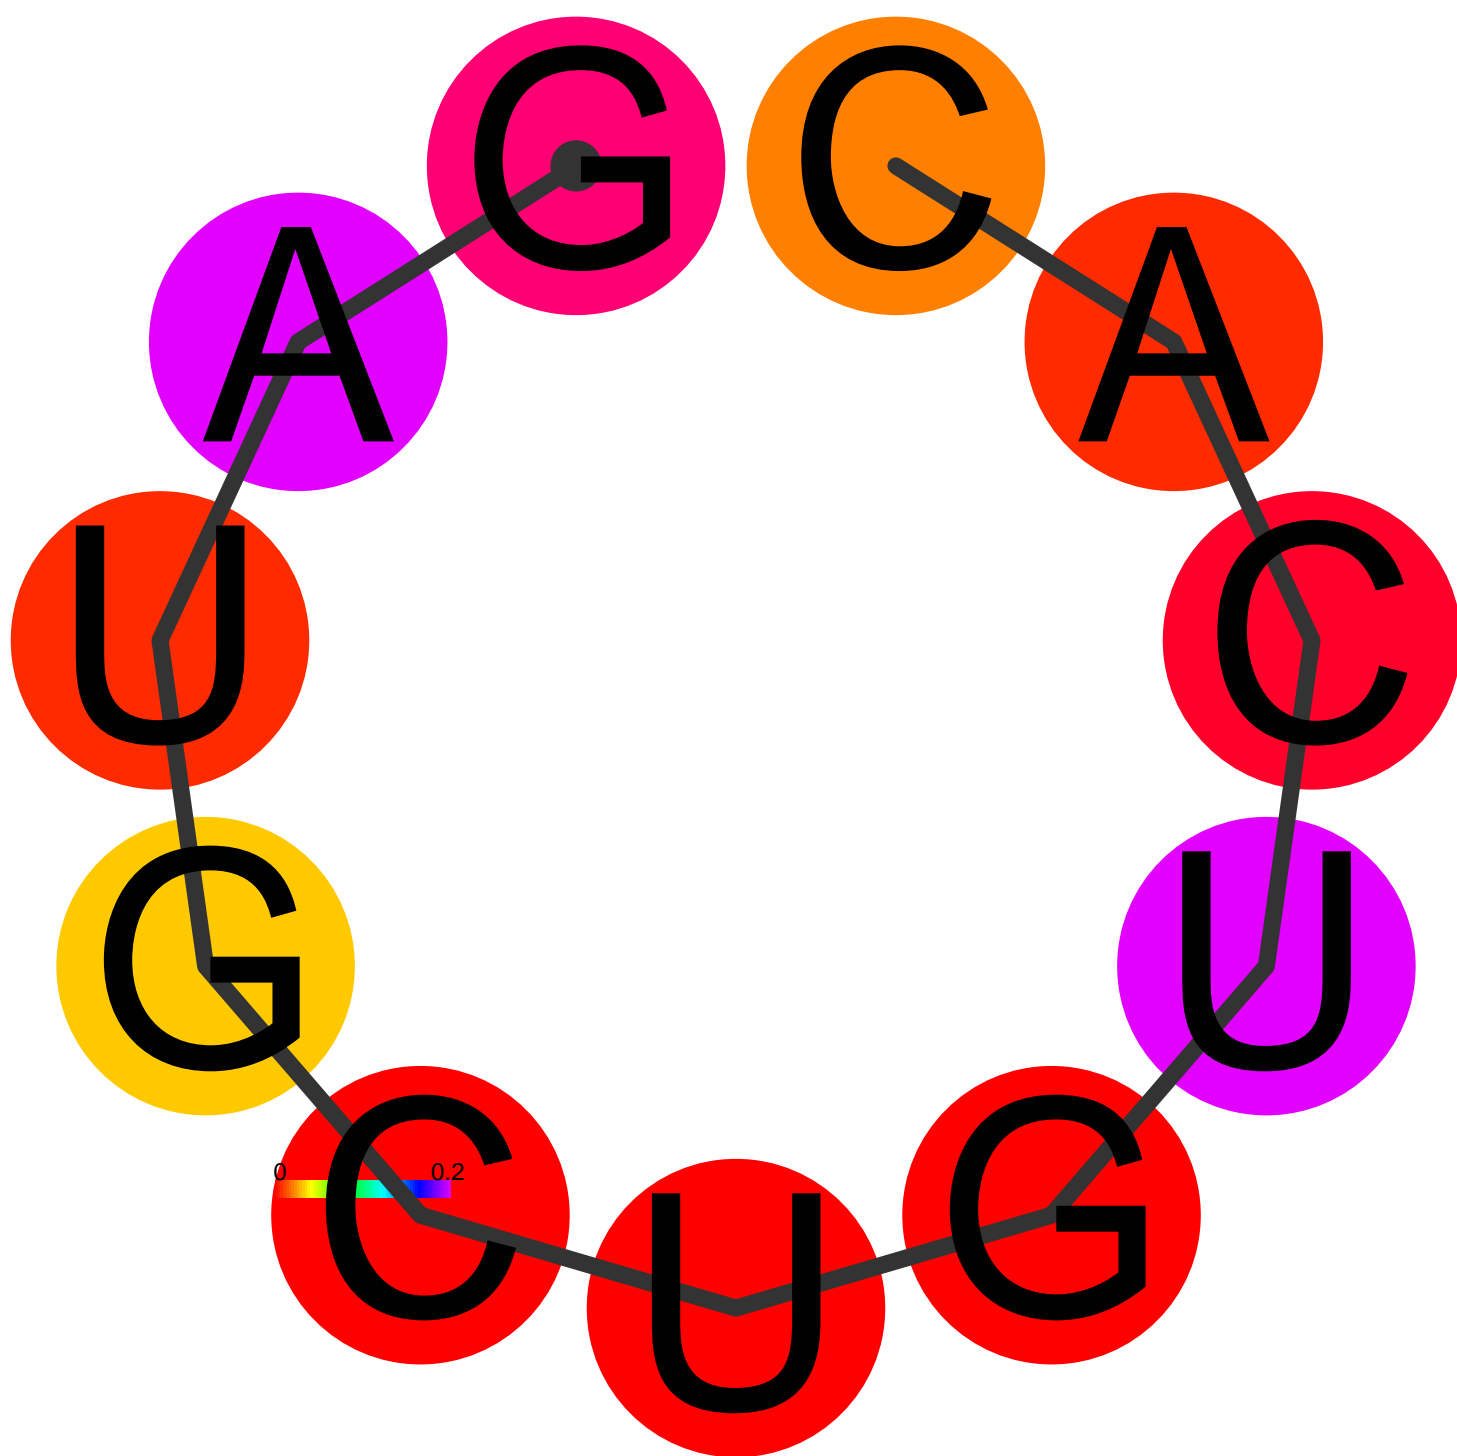

Supplement: Supplementary file 231 [file supplementary]



Supplement: Supplementary file 232 [file supplementary]

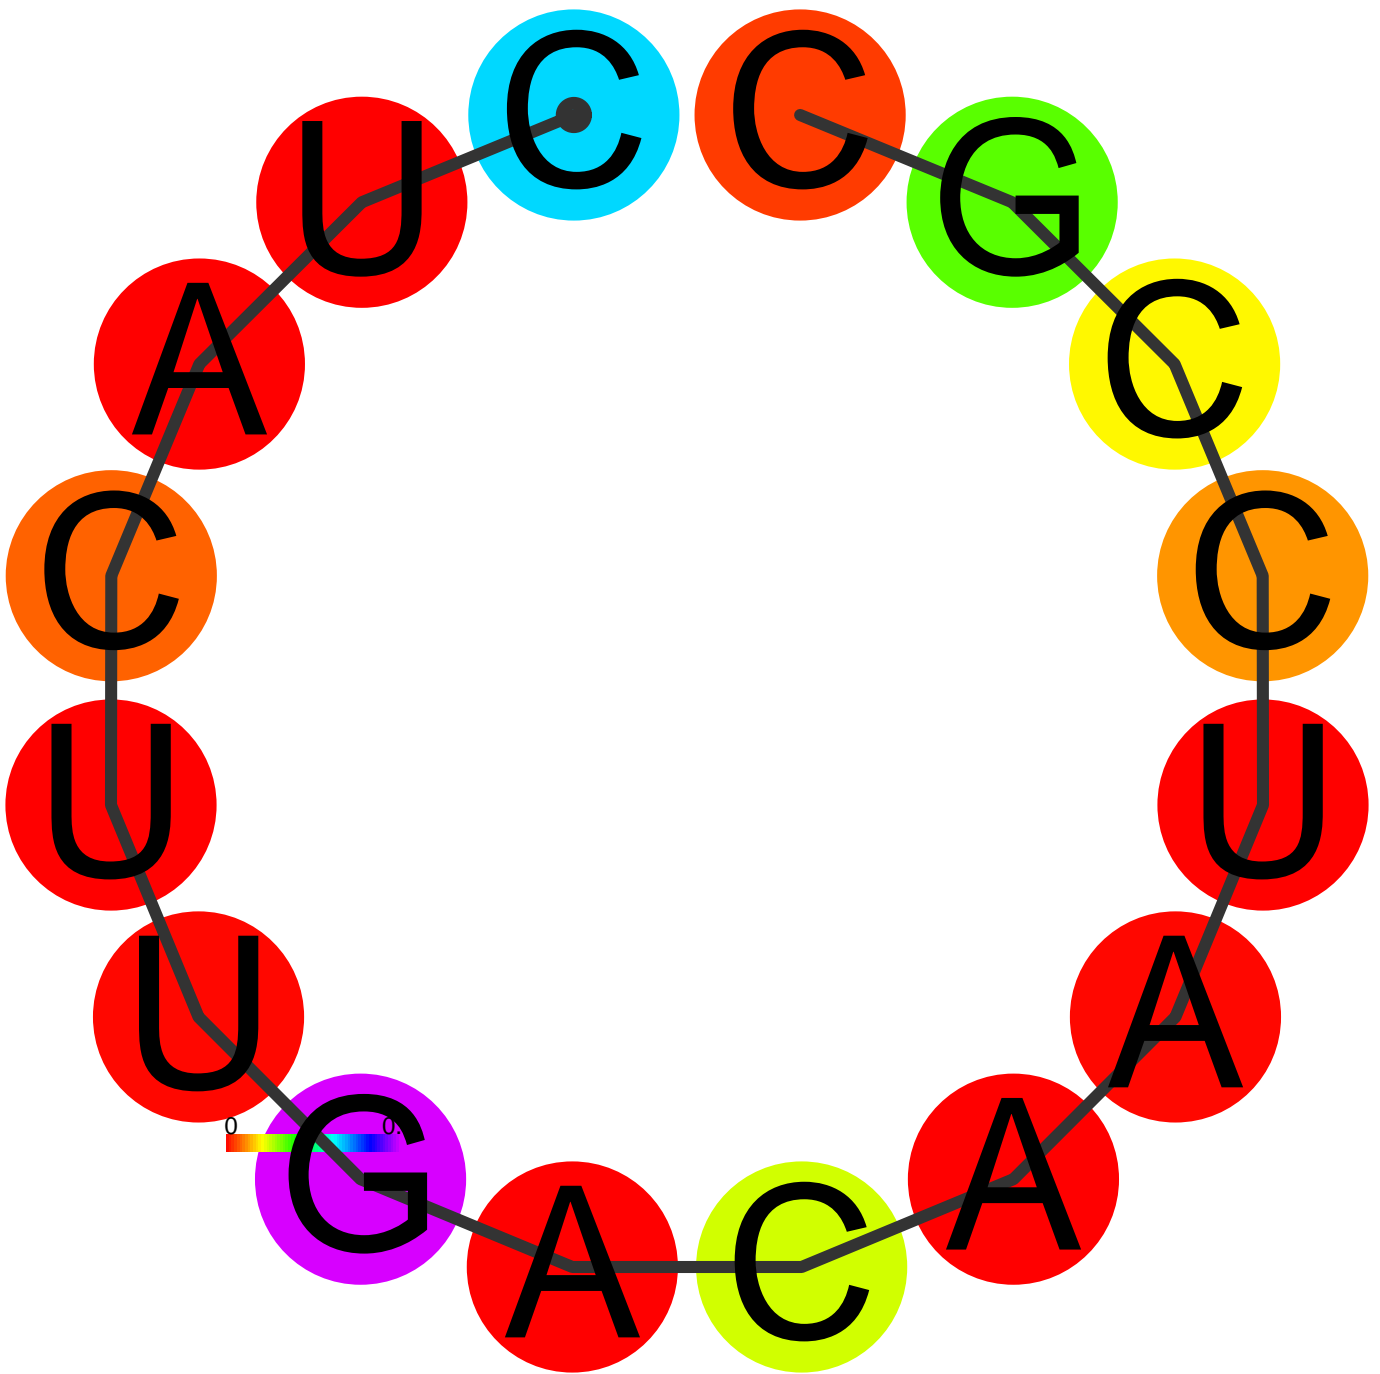

Supplement: Supplementary file 233 [file supplementary]

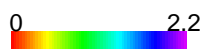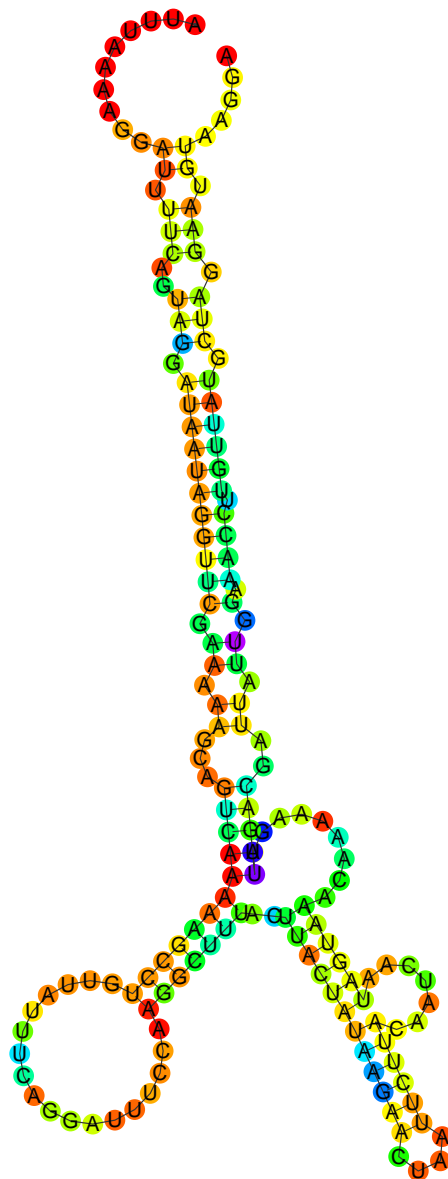

Supplement: Supplementary file 234 [file supplementary]

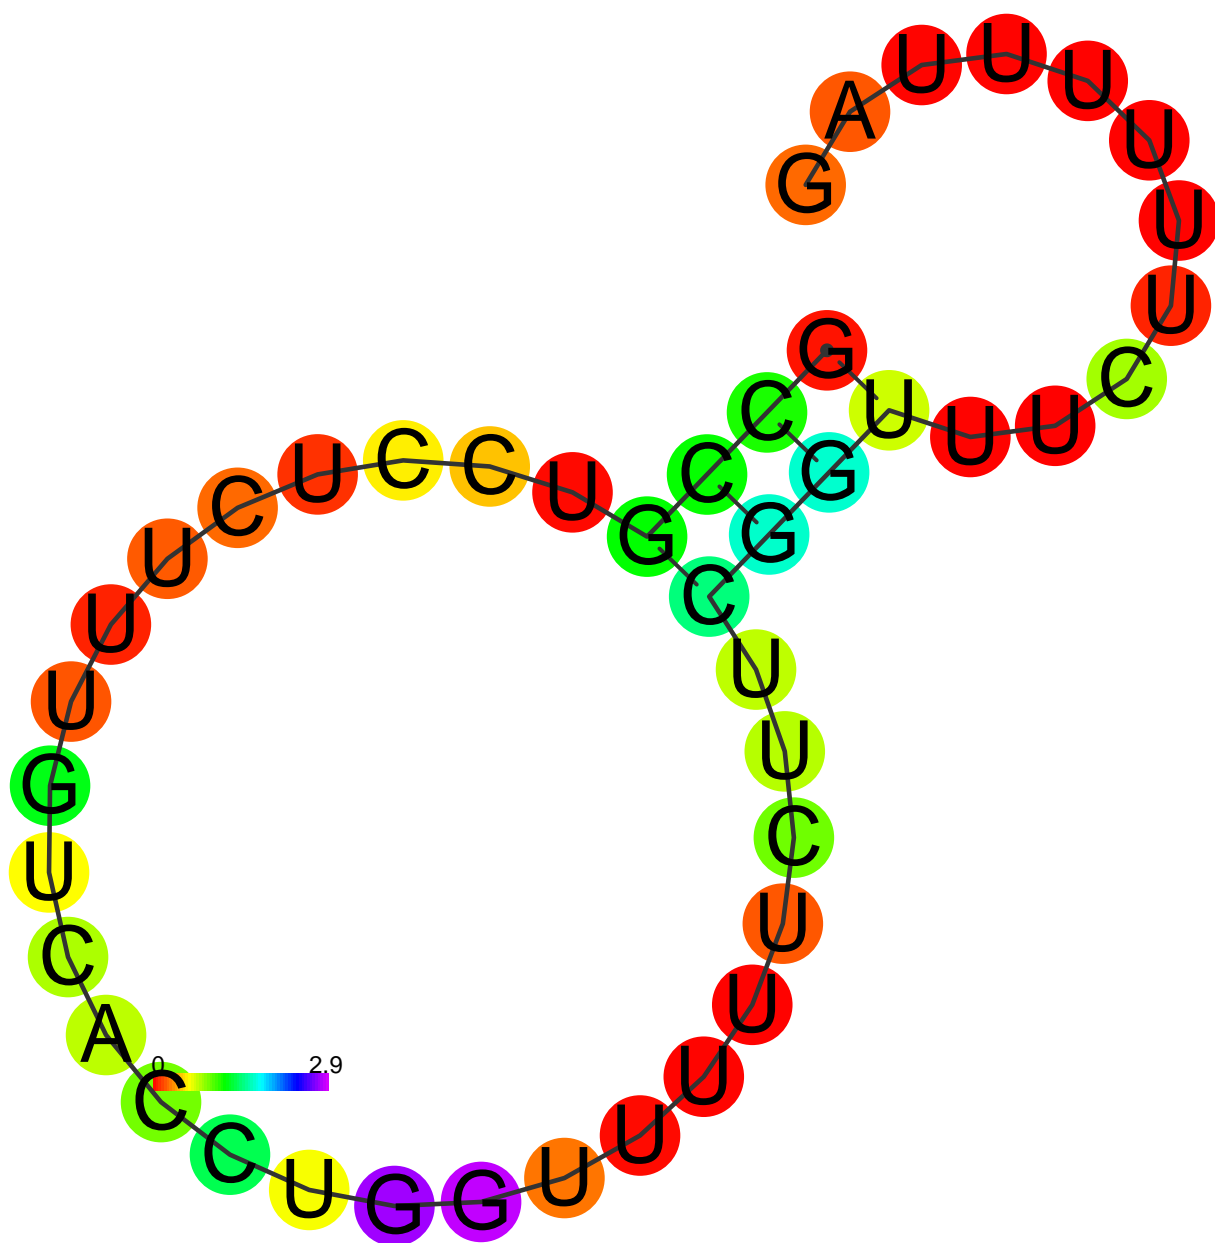

Supplement: Supplementary file 235 [file supplementary]

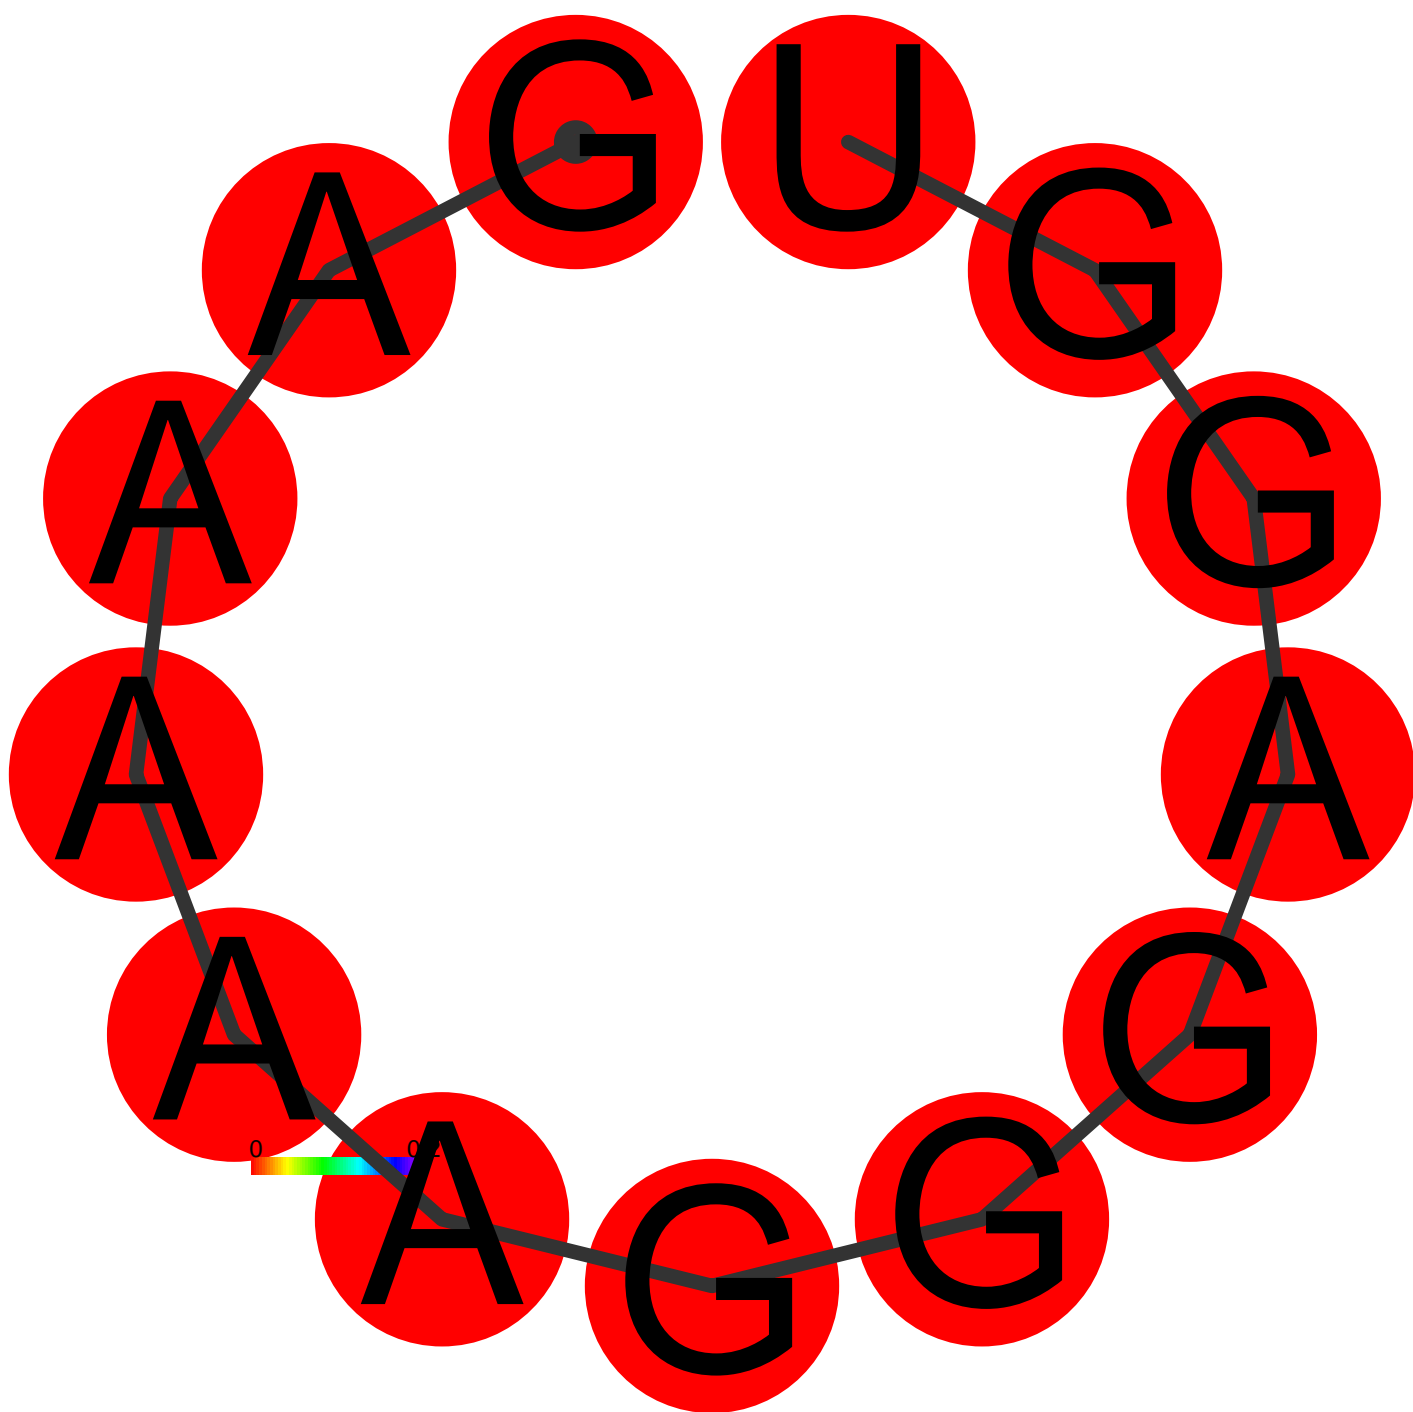

Supplement: Supplementary file 236 [file supplementary]

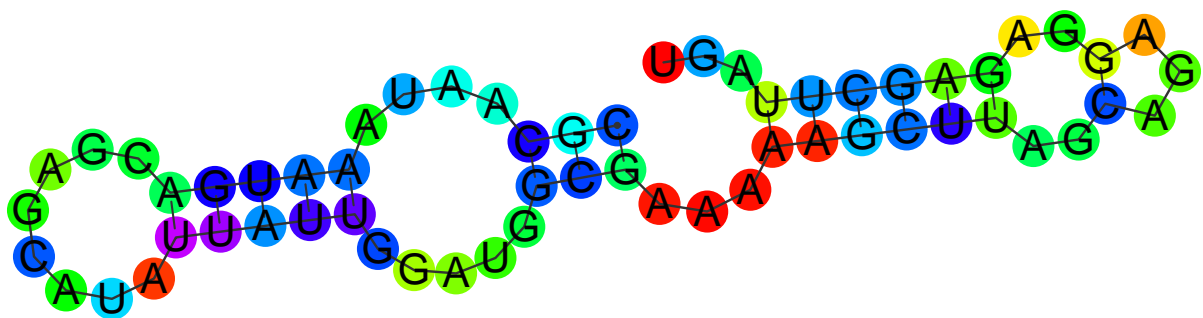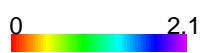

Supplement: Supplementary file 237 [file supplementary]

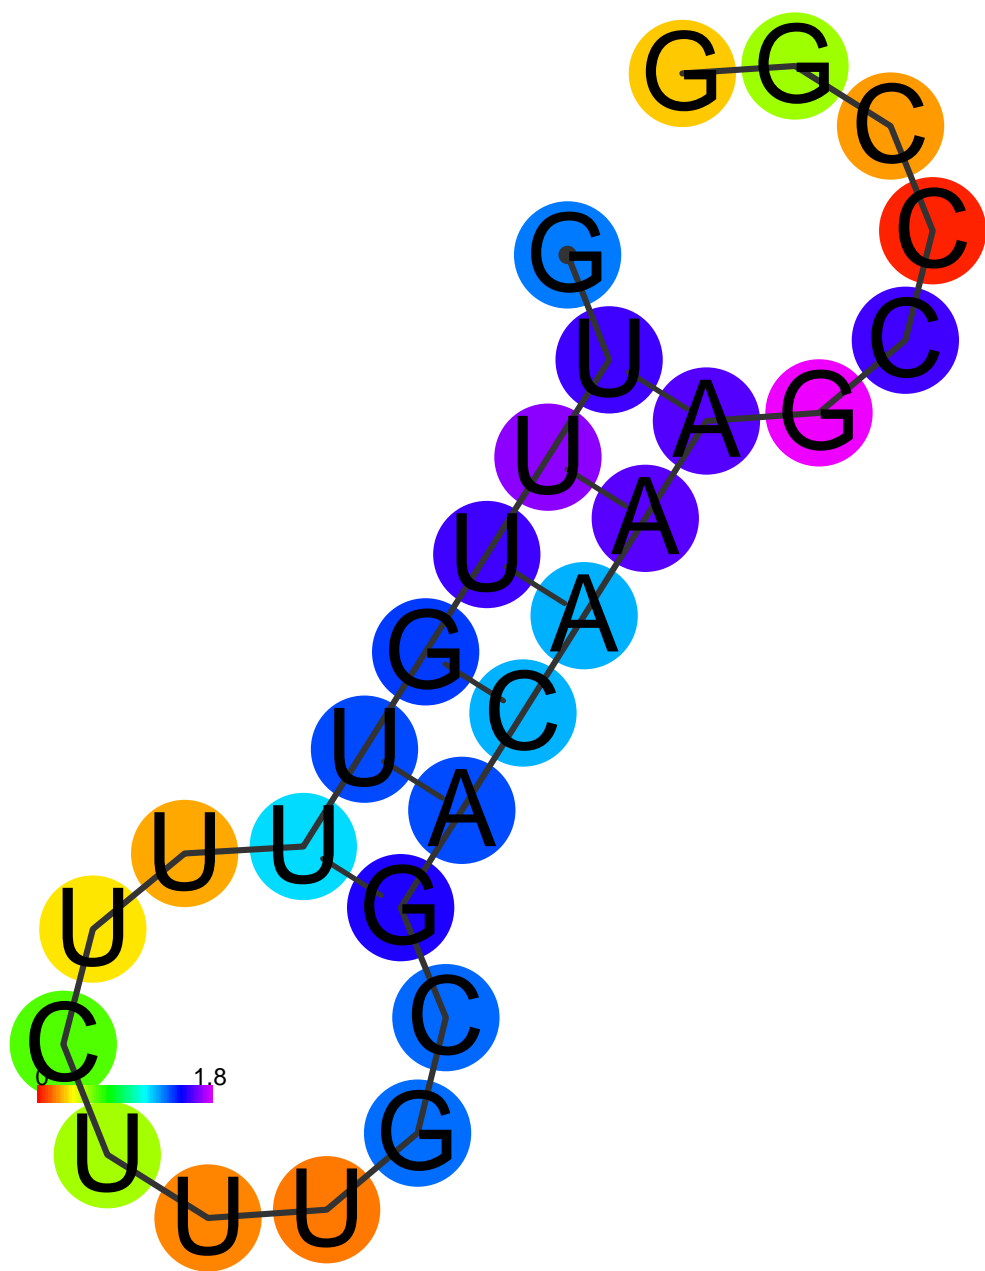

Supplement: Supplementary file 238 [file supplementary]

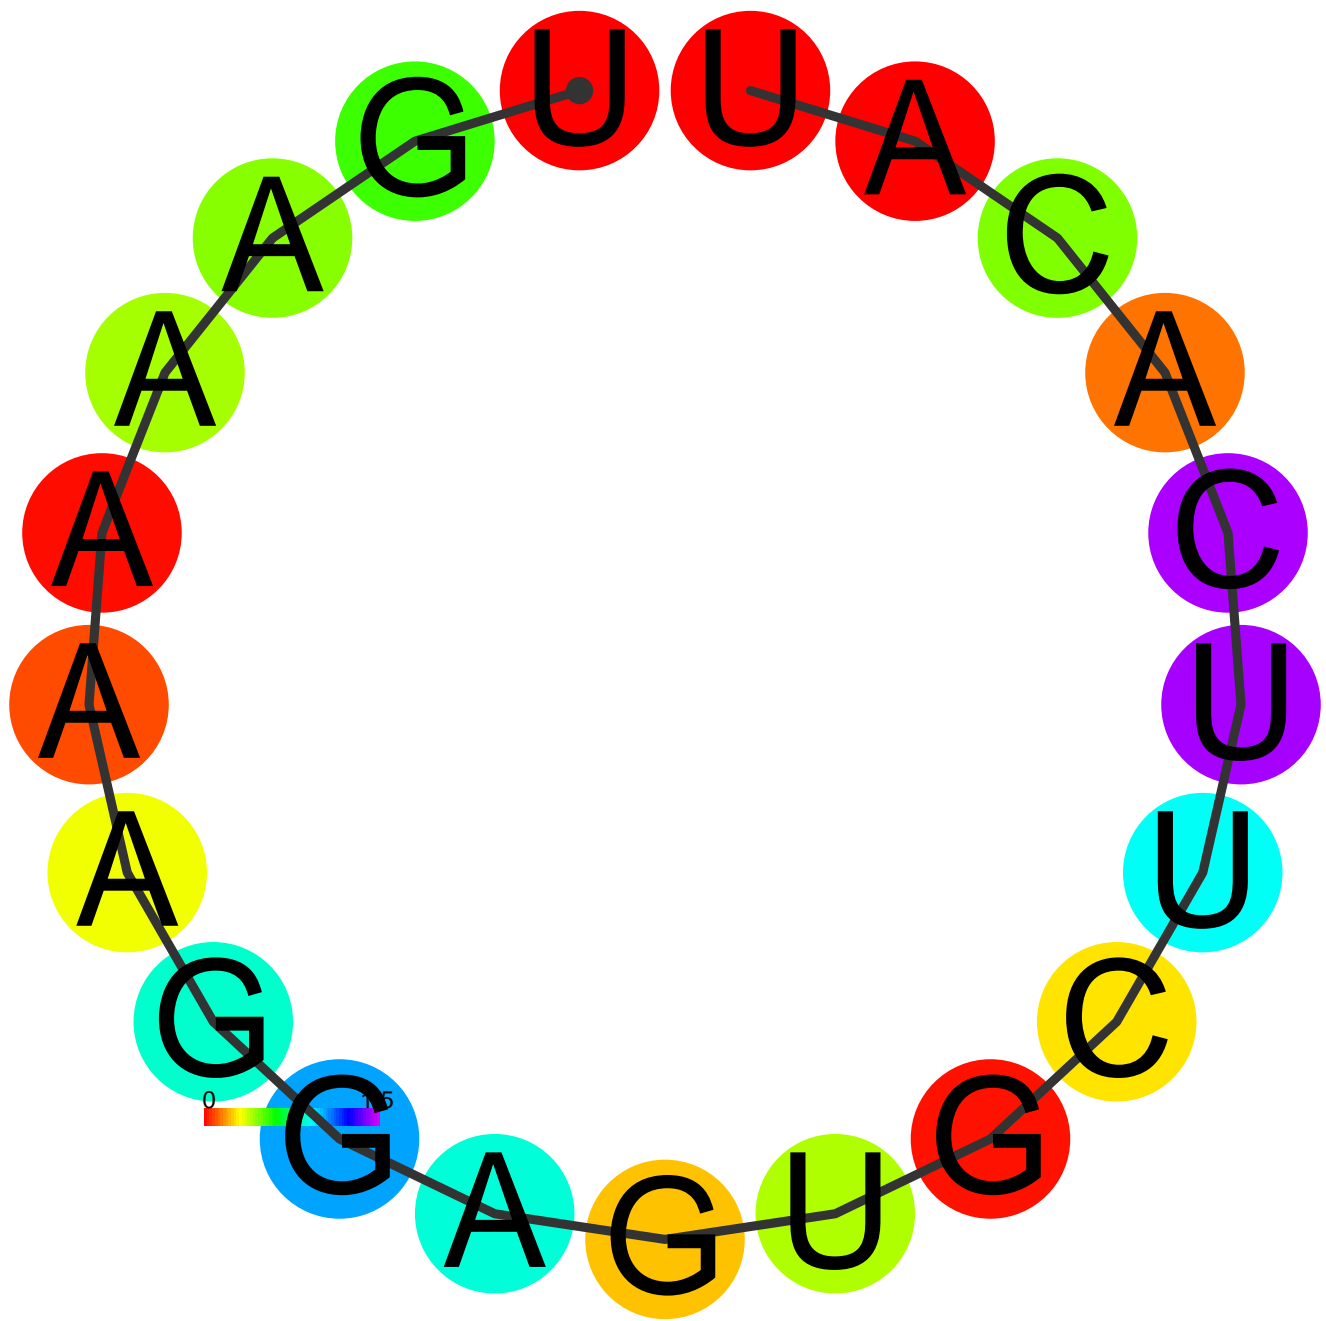

Supplement: Supplementary file 239 [file supplementary]

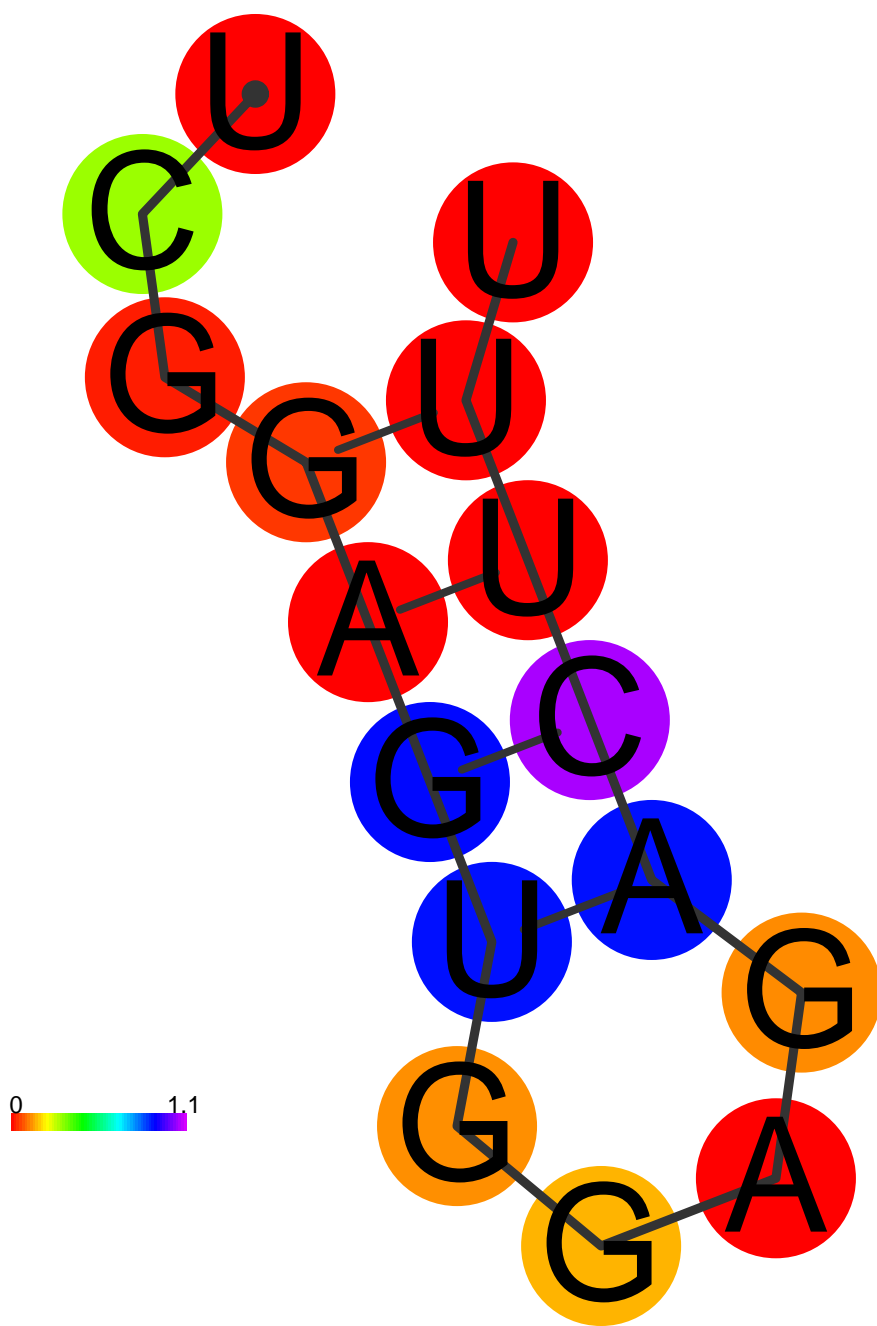

Supplement: Supplementary file 240 [file supplementary]

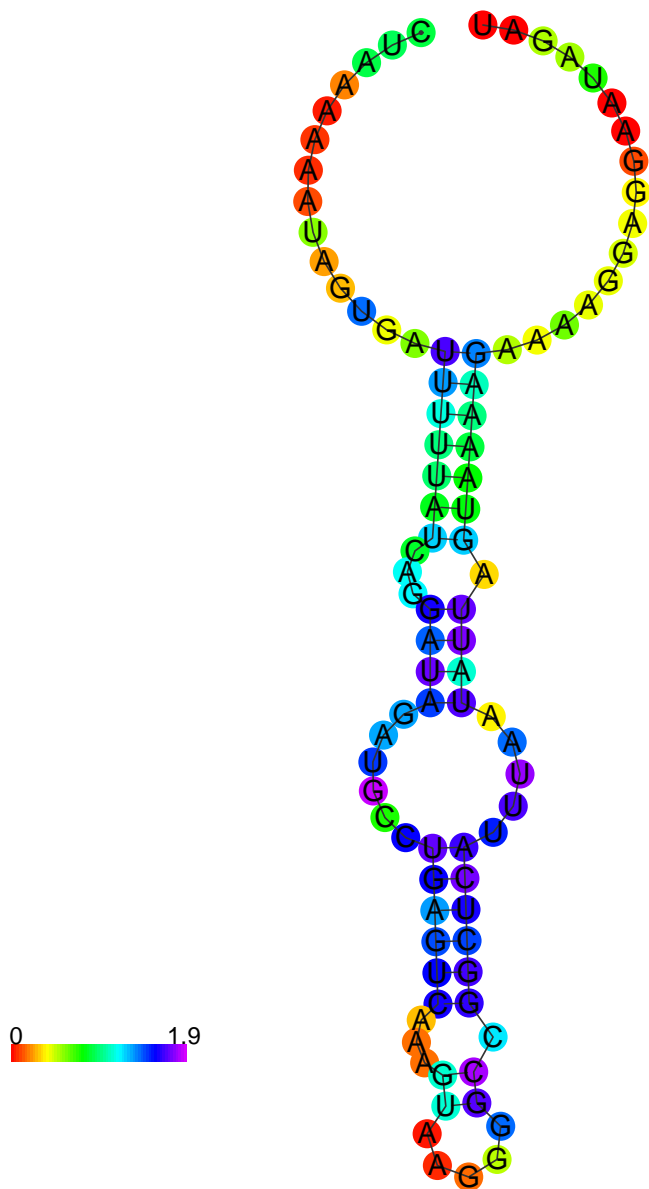

Supplement: Supplementary file 241 [file supplementary]

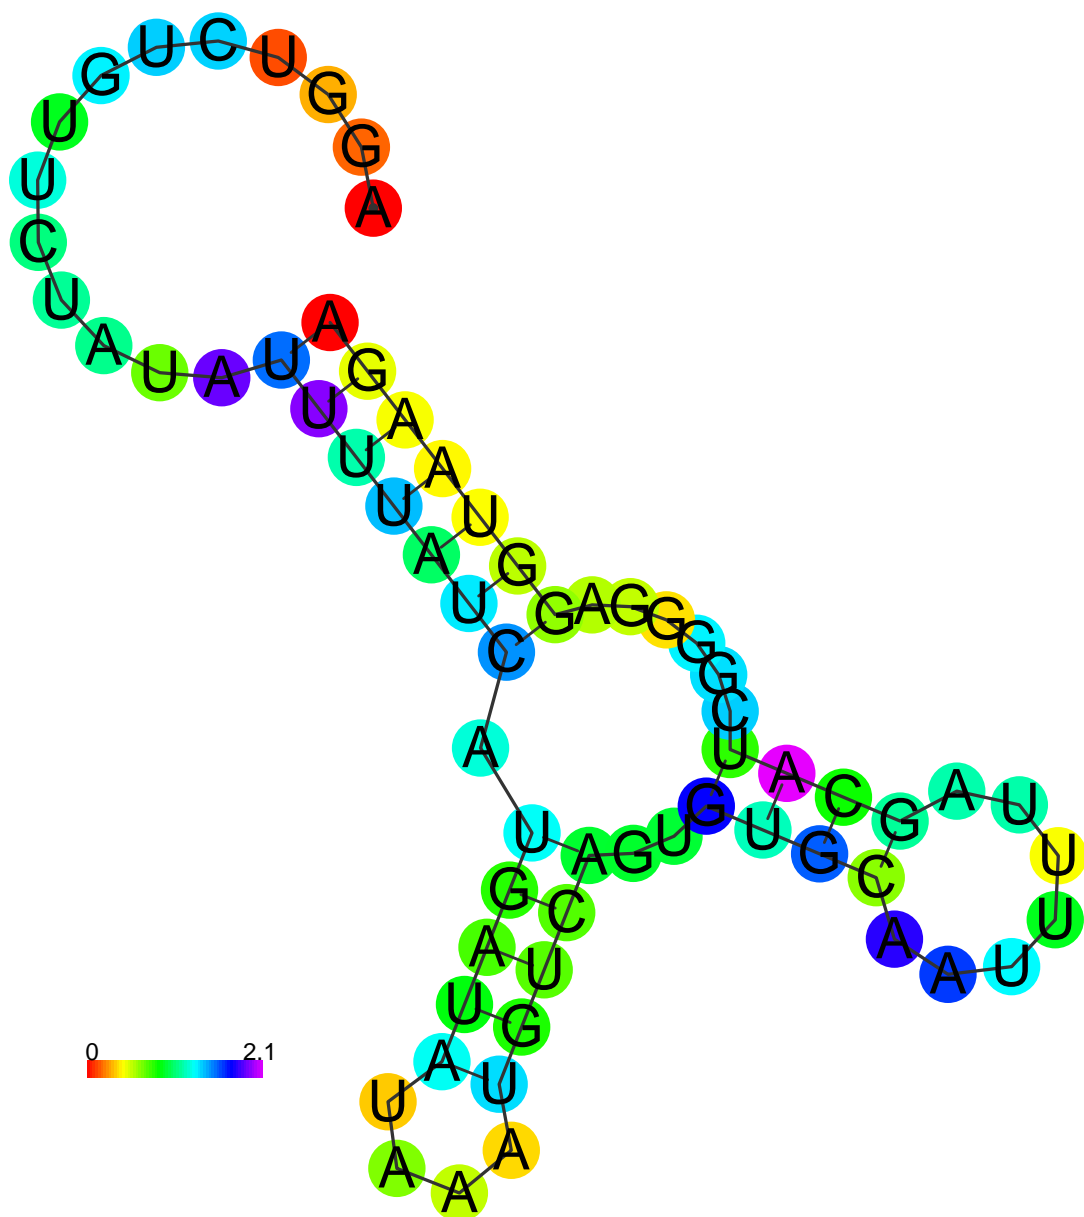

Supplement: Supplementary file 242 [file supplementary]



Supplement: Supplementary file 243 [file supplementary]

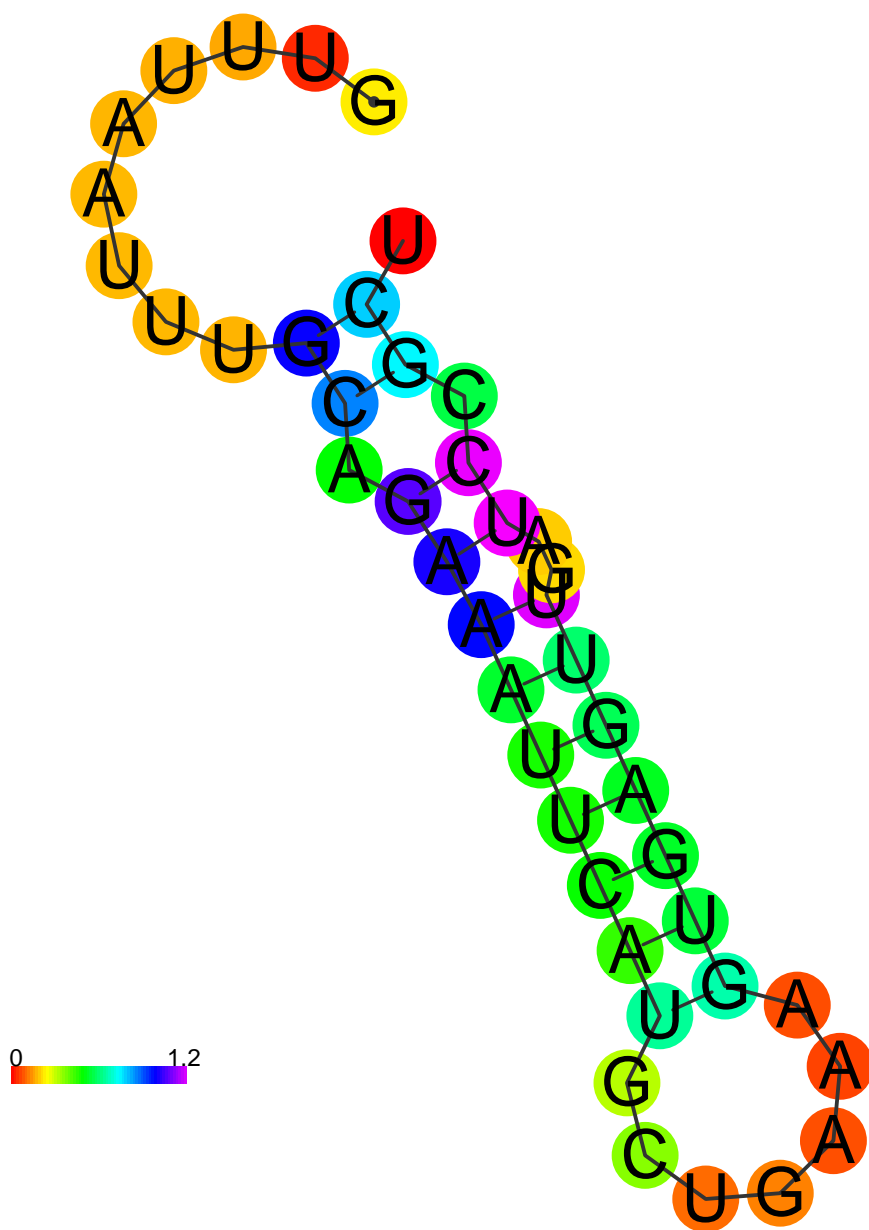

Supplement: Supplementary file 244 [file supplementary]

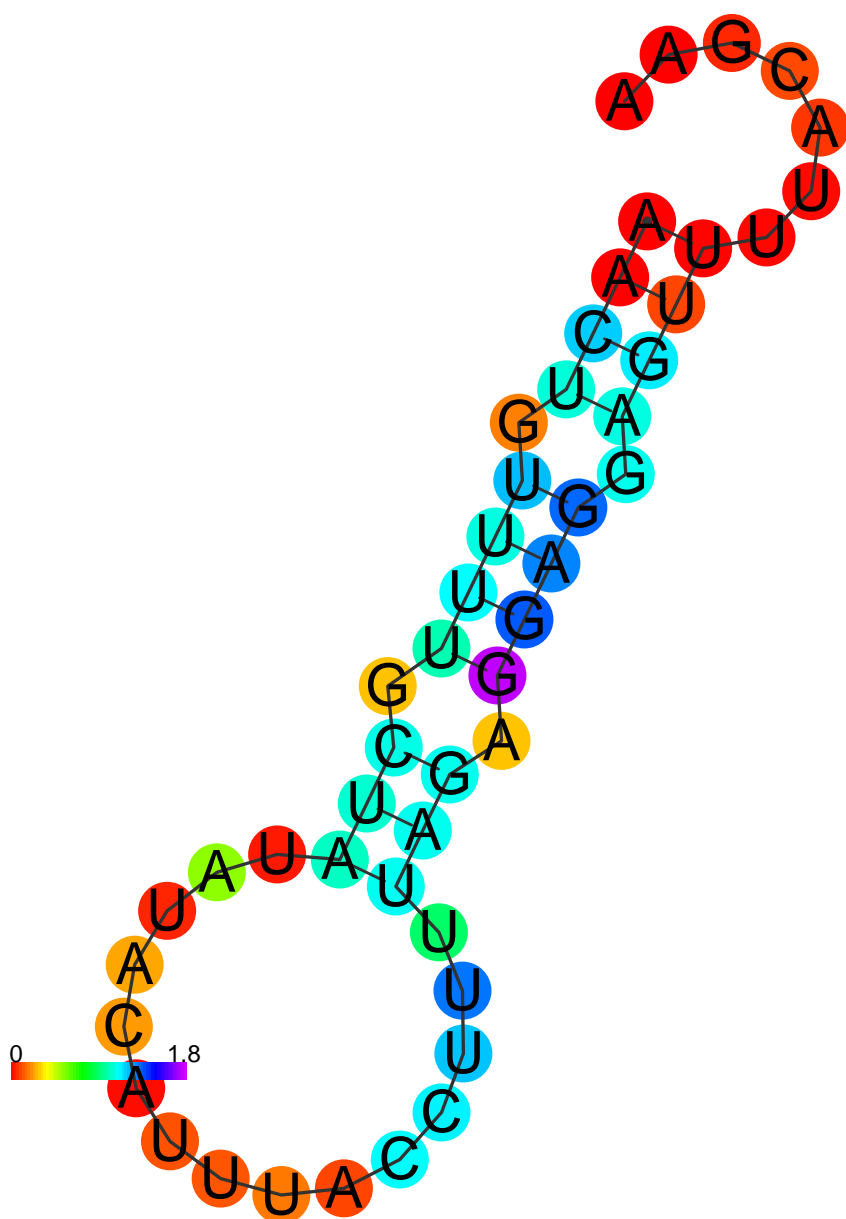

Supplement: Supplementary file 245 [file supplementary]

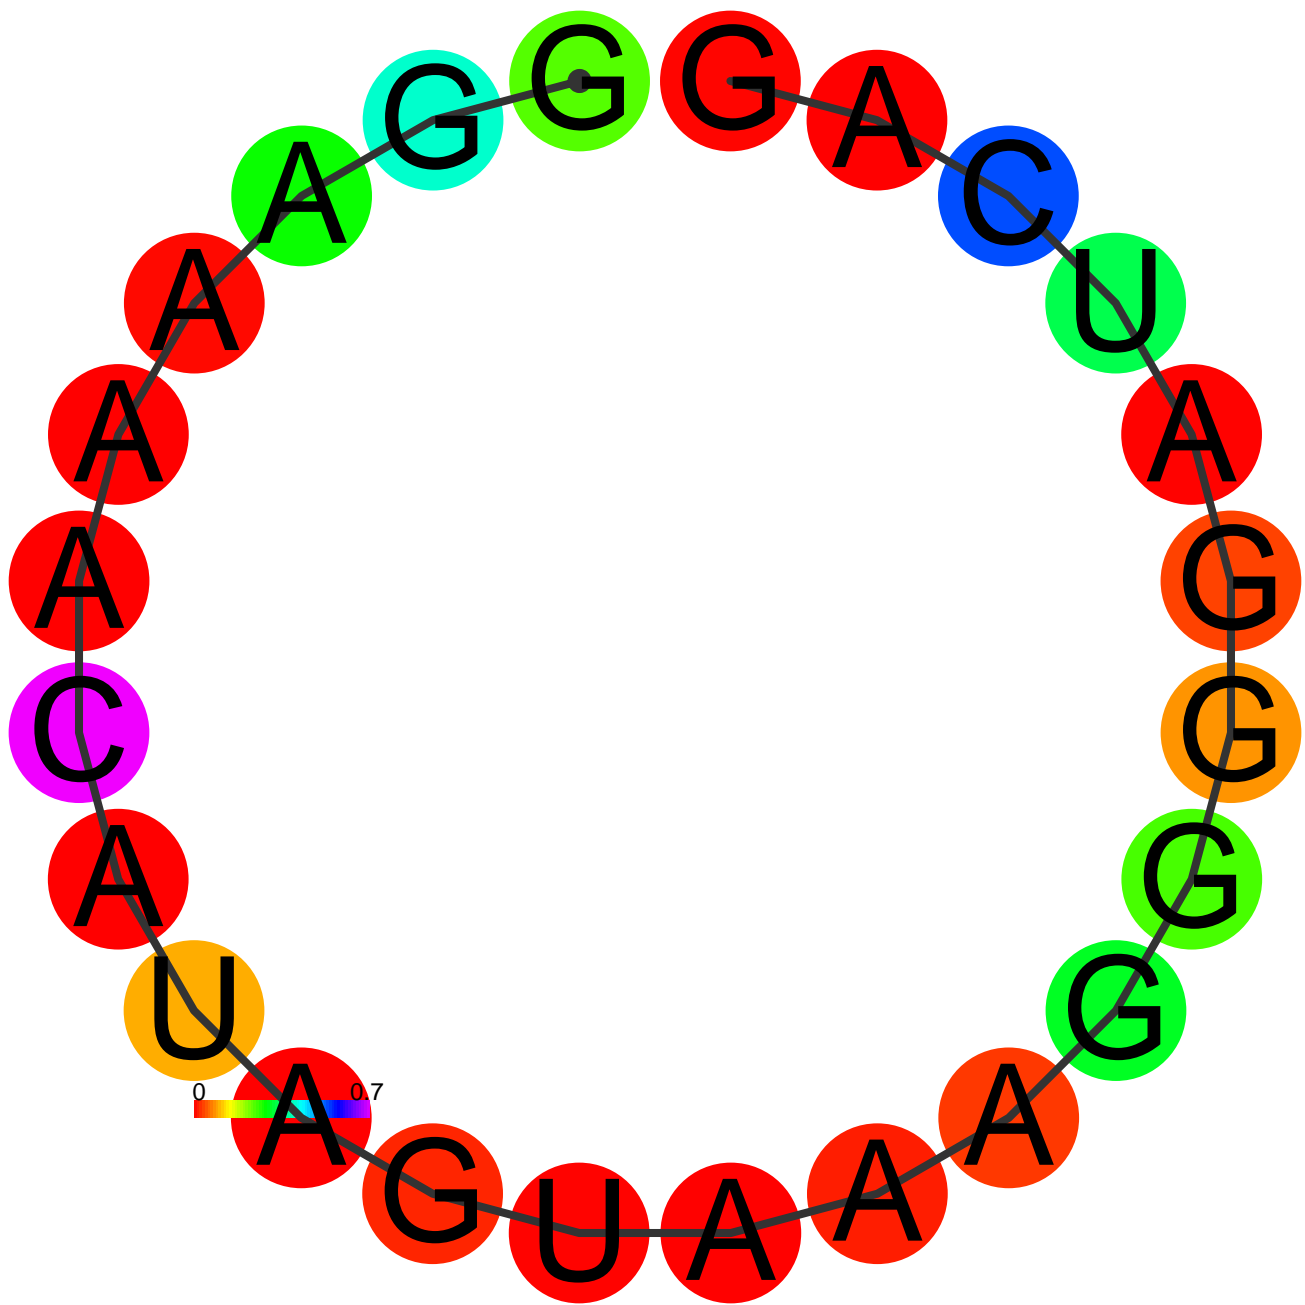

Supplement: Supplementary file 246 [file supplementary]

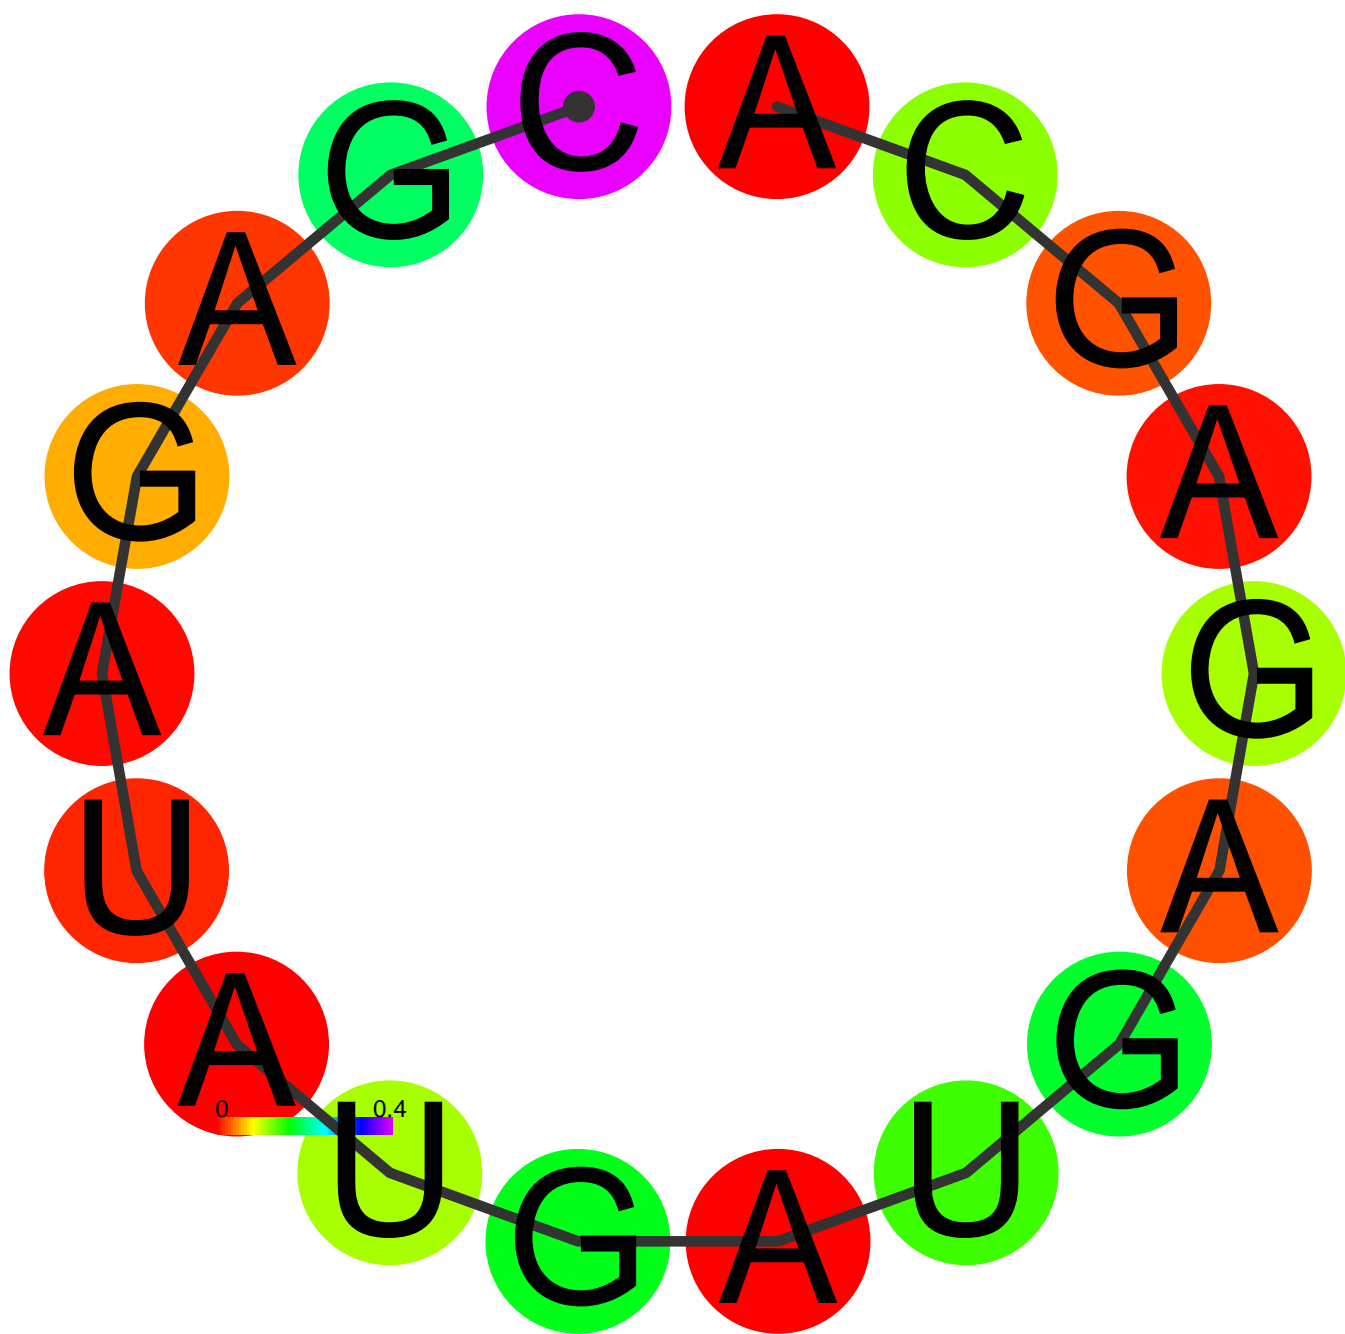

Supplement: Supplementary file 247 [file supplementary]

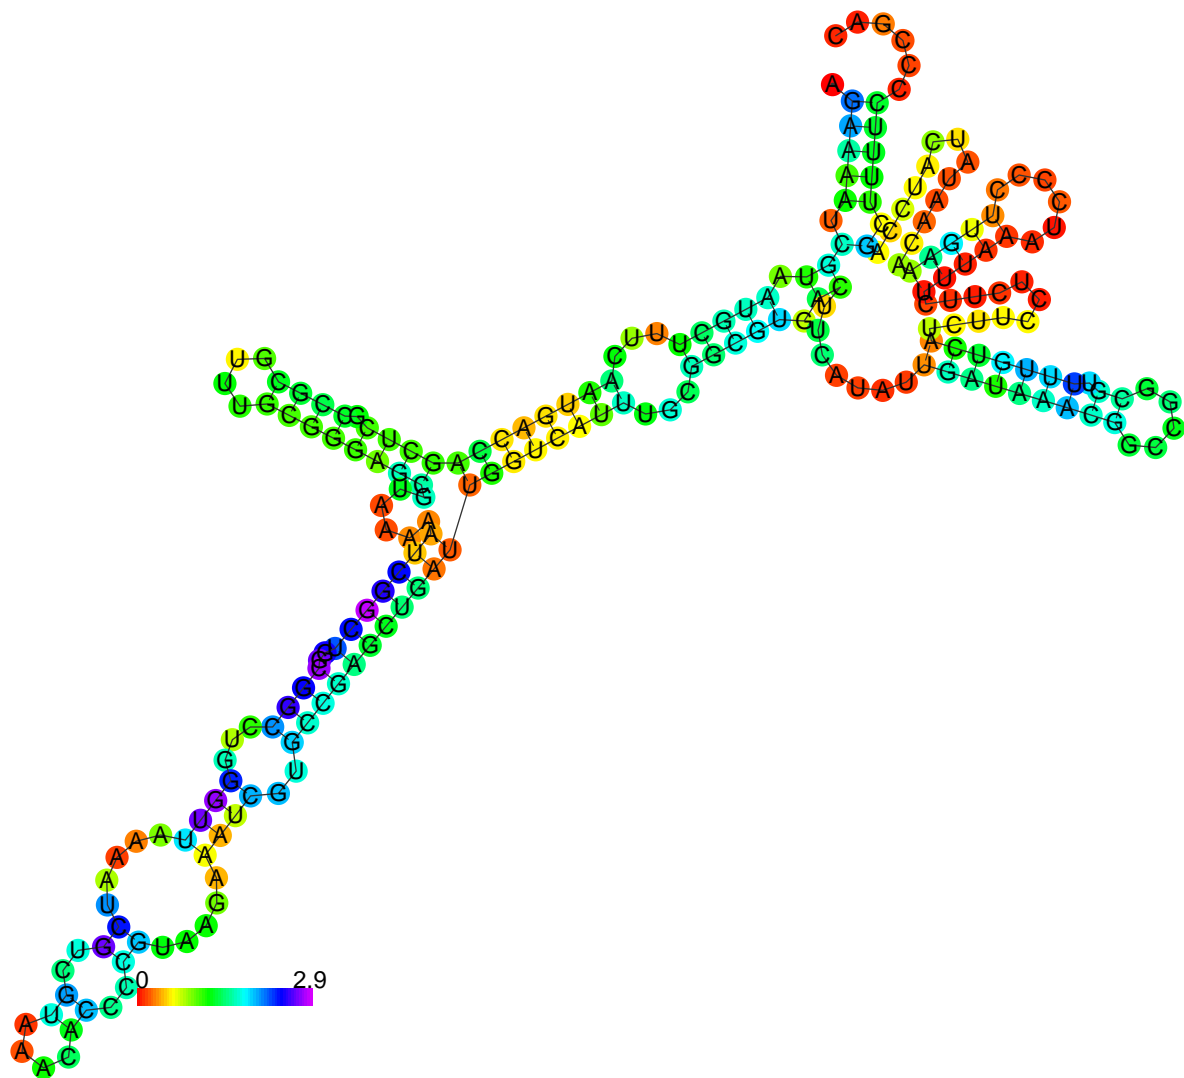

Supplement: Supplementary file 248 [file supplementary]

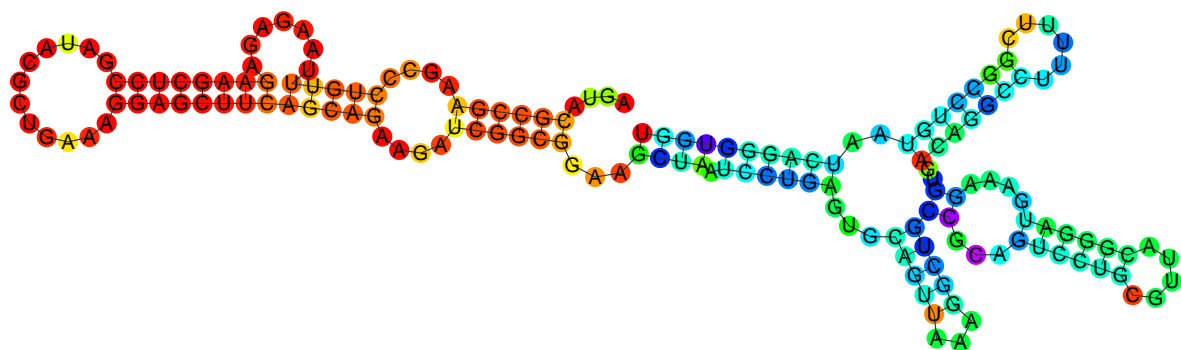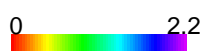

Supplement: Supplementary file 249 [file supplementary]

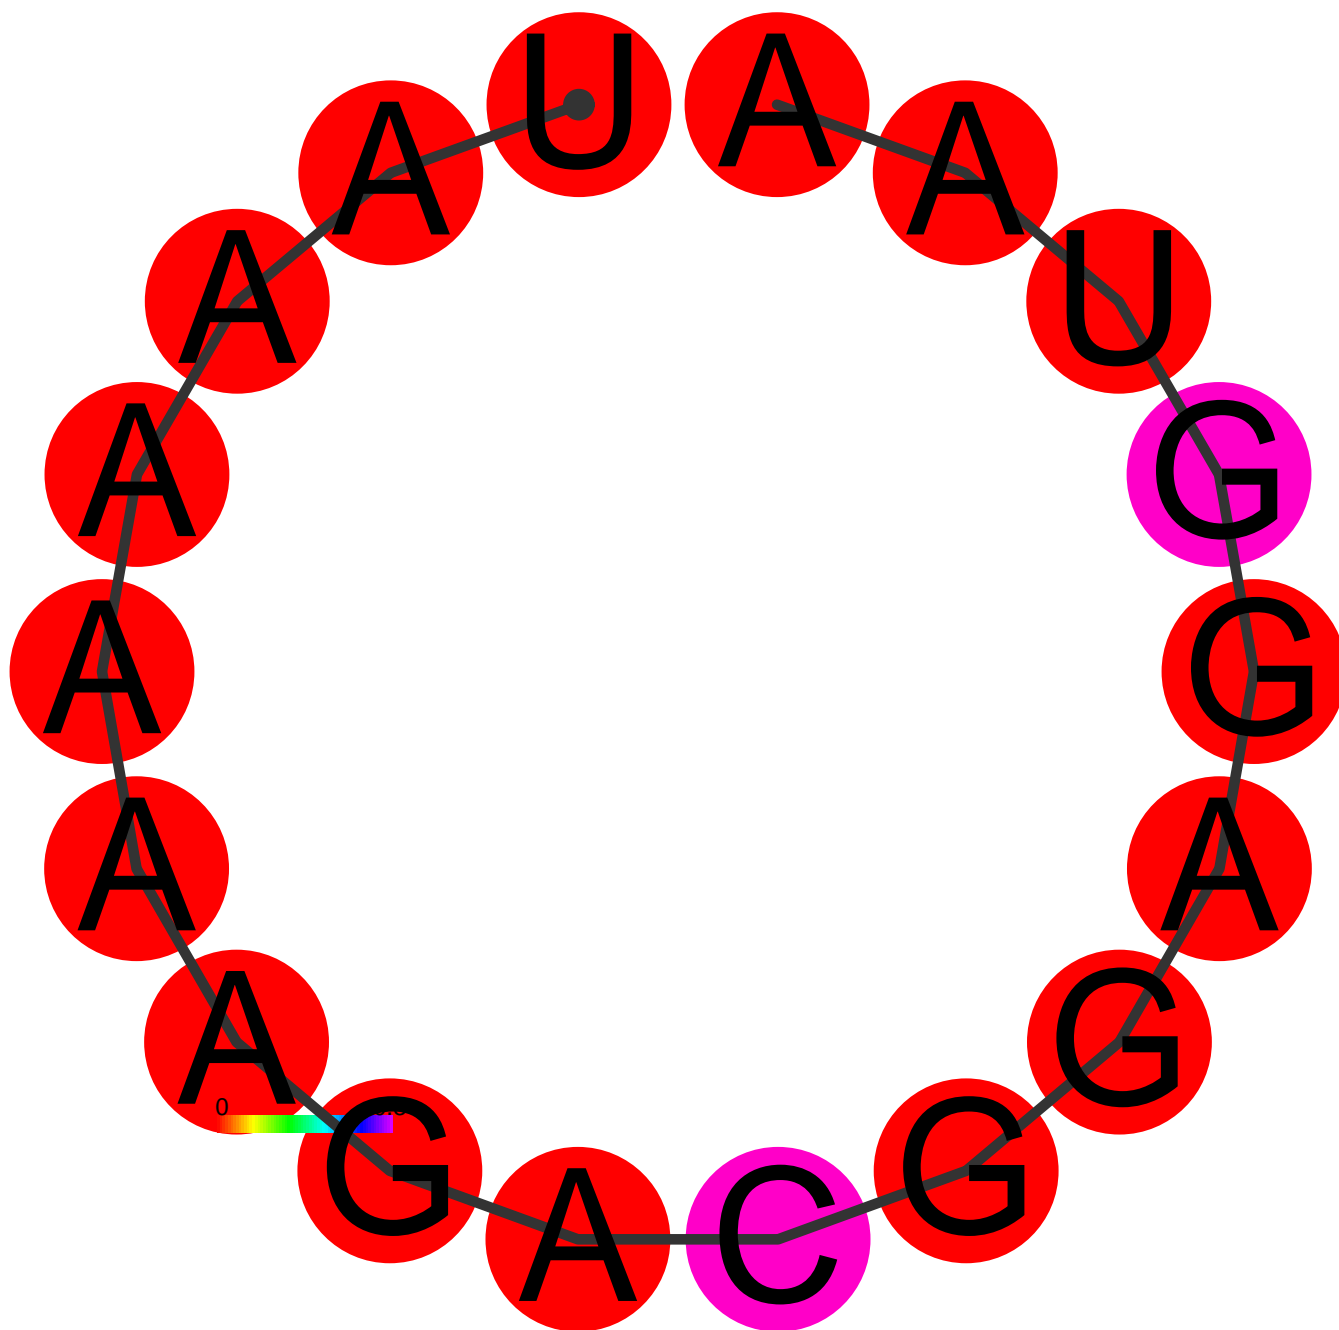

Supplement: Supplementary file 250 [file supplementary]

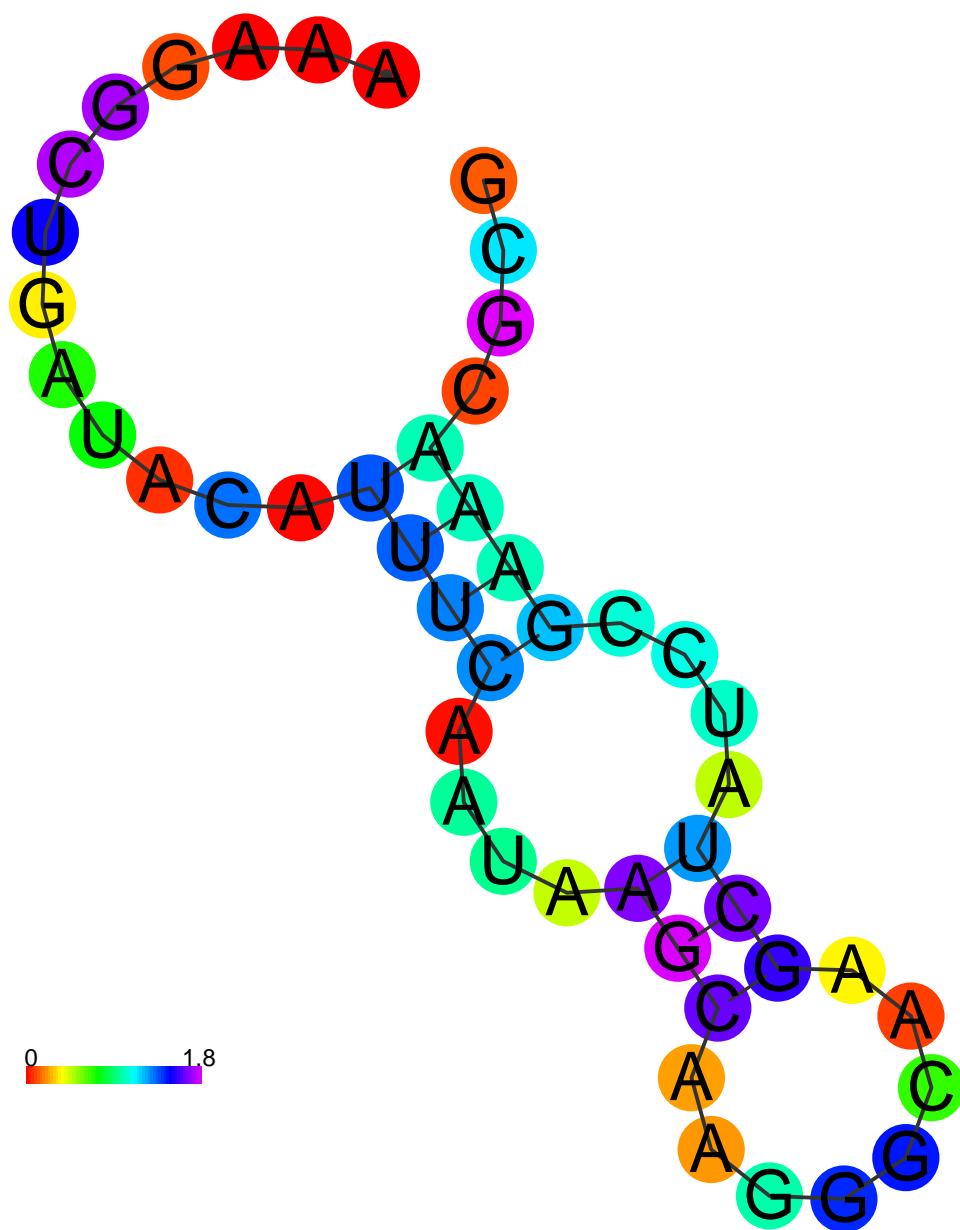

Supplement: Supplementary file 251 [file supplementary]

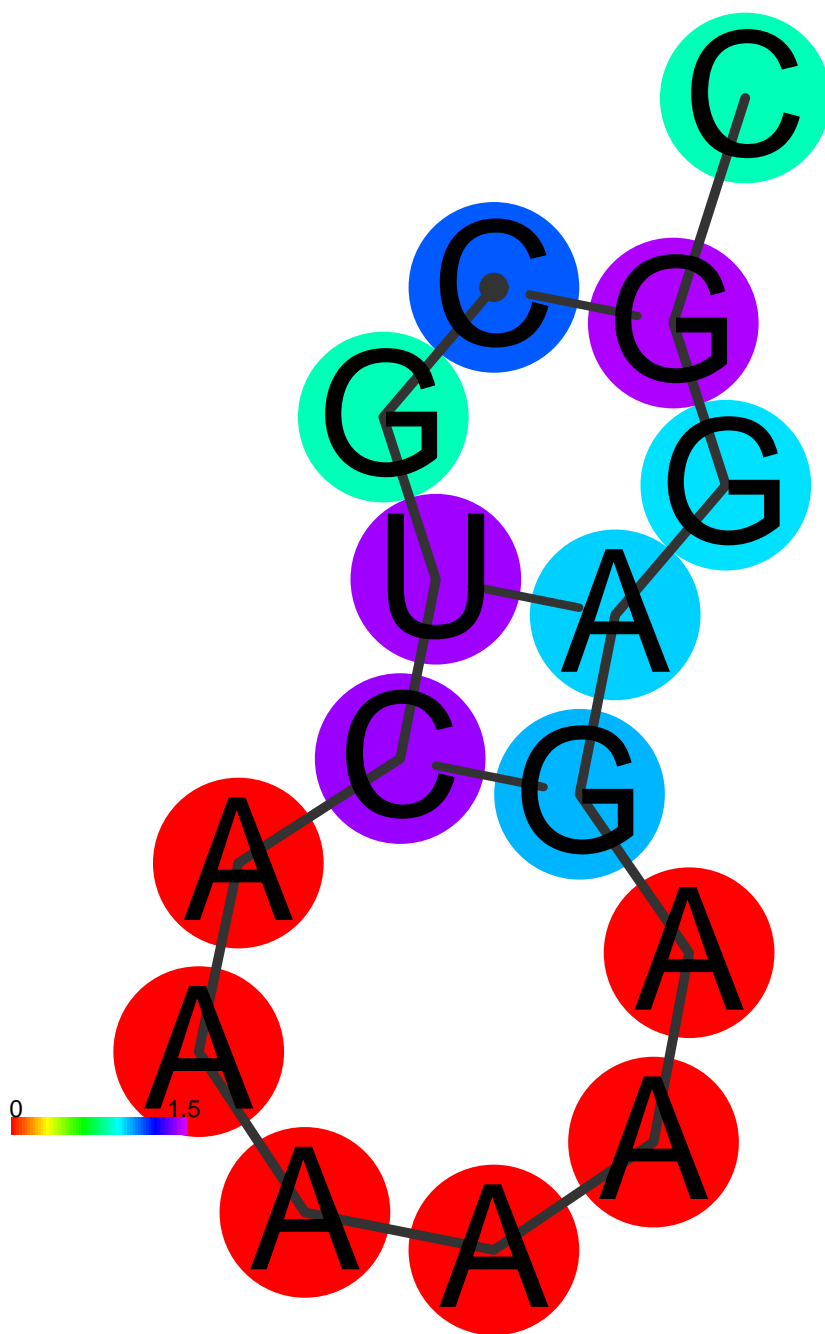

Supplement: Supplementary file 252 [file supplementary]

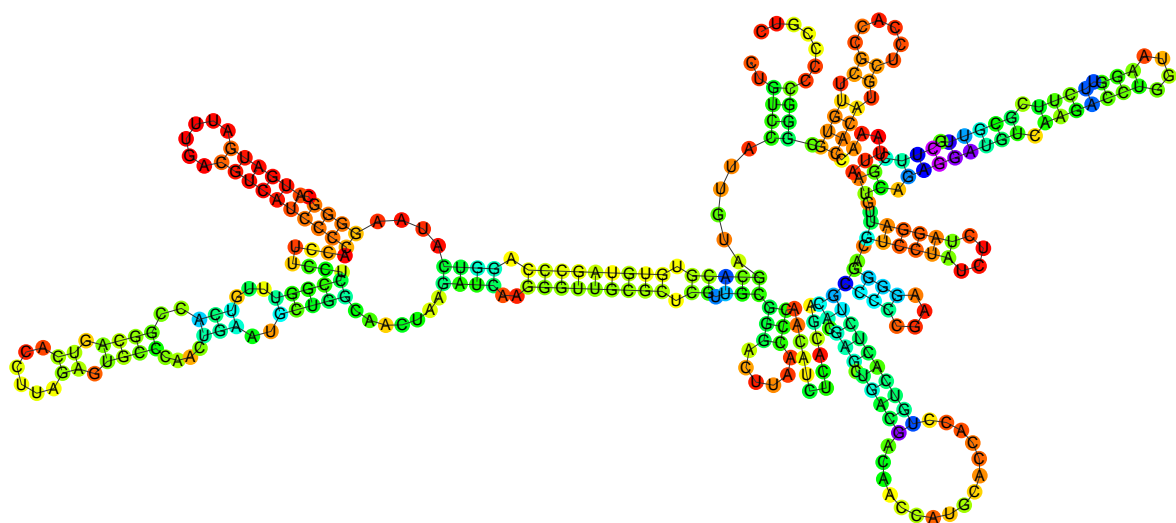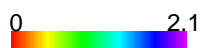

Supplement: Supplementary file 253 [file supplementary]

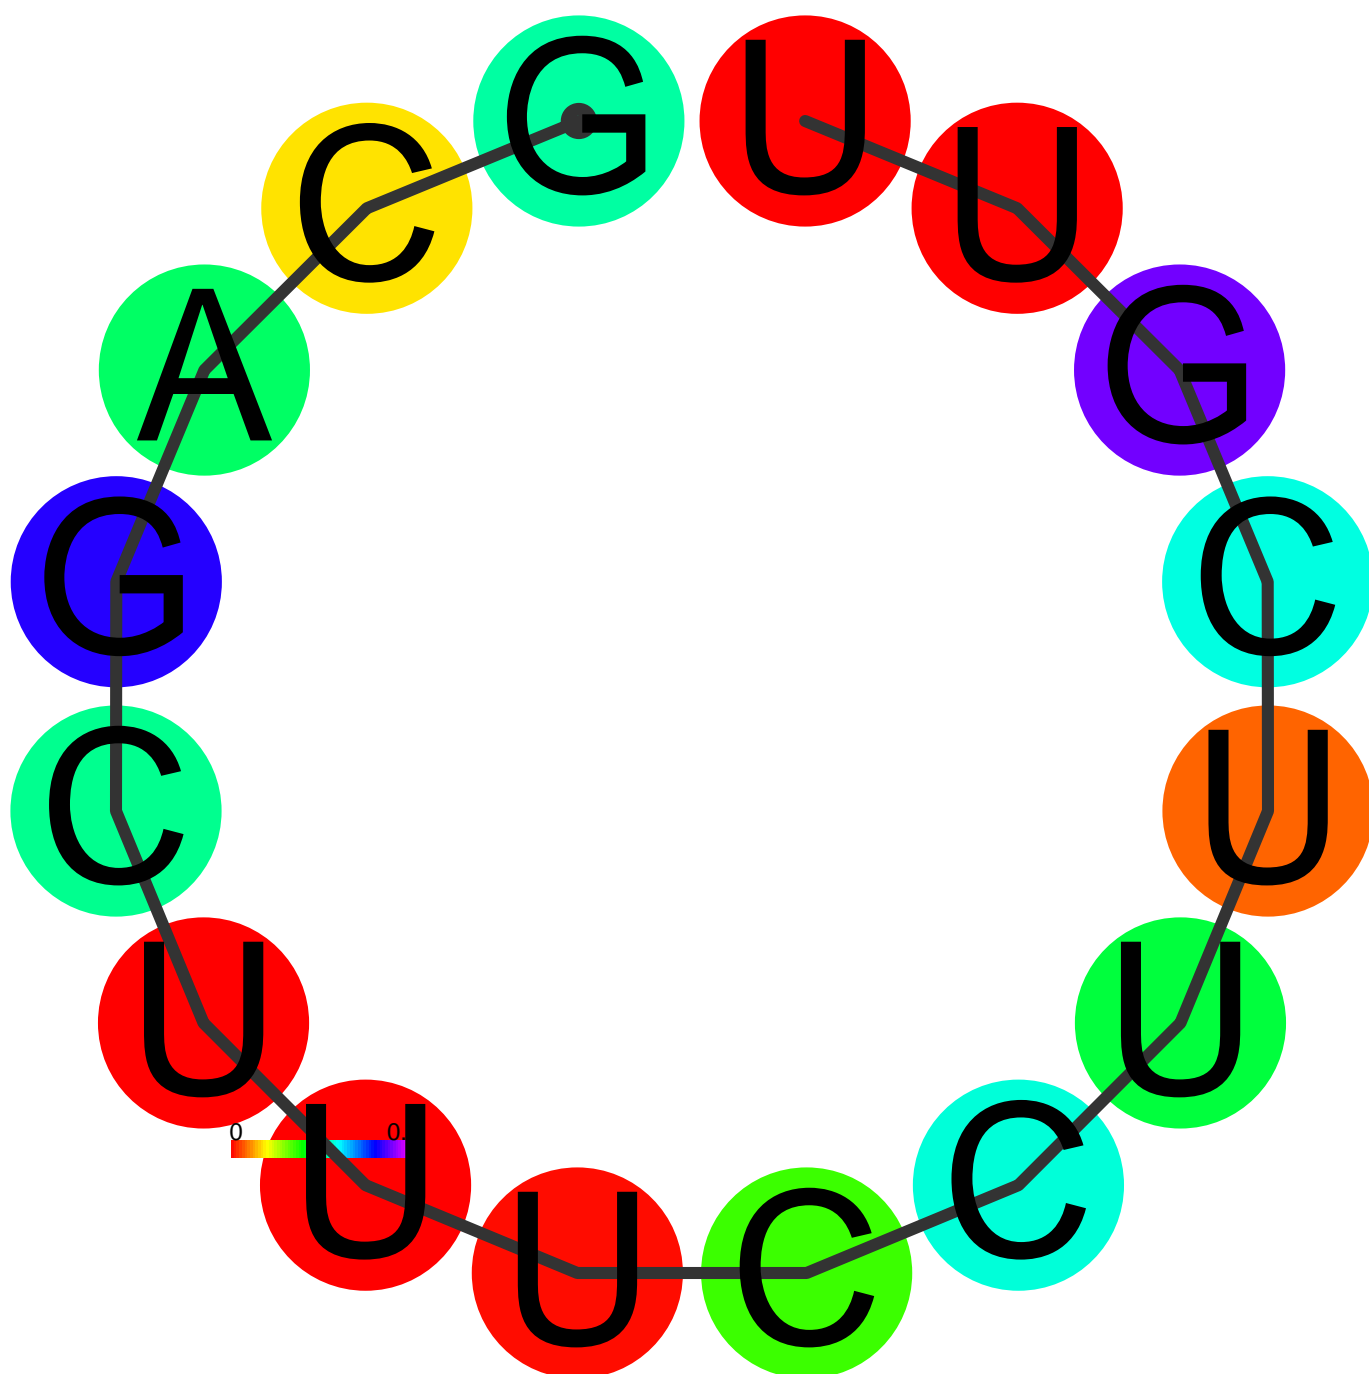

Supplement: Supplementary file 254 [file supplementary]



Supplement: Supplementary file 255 [file supplementary]

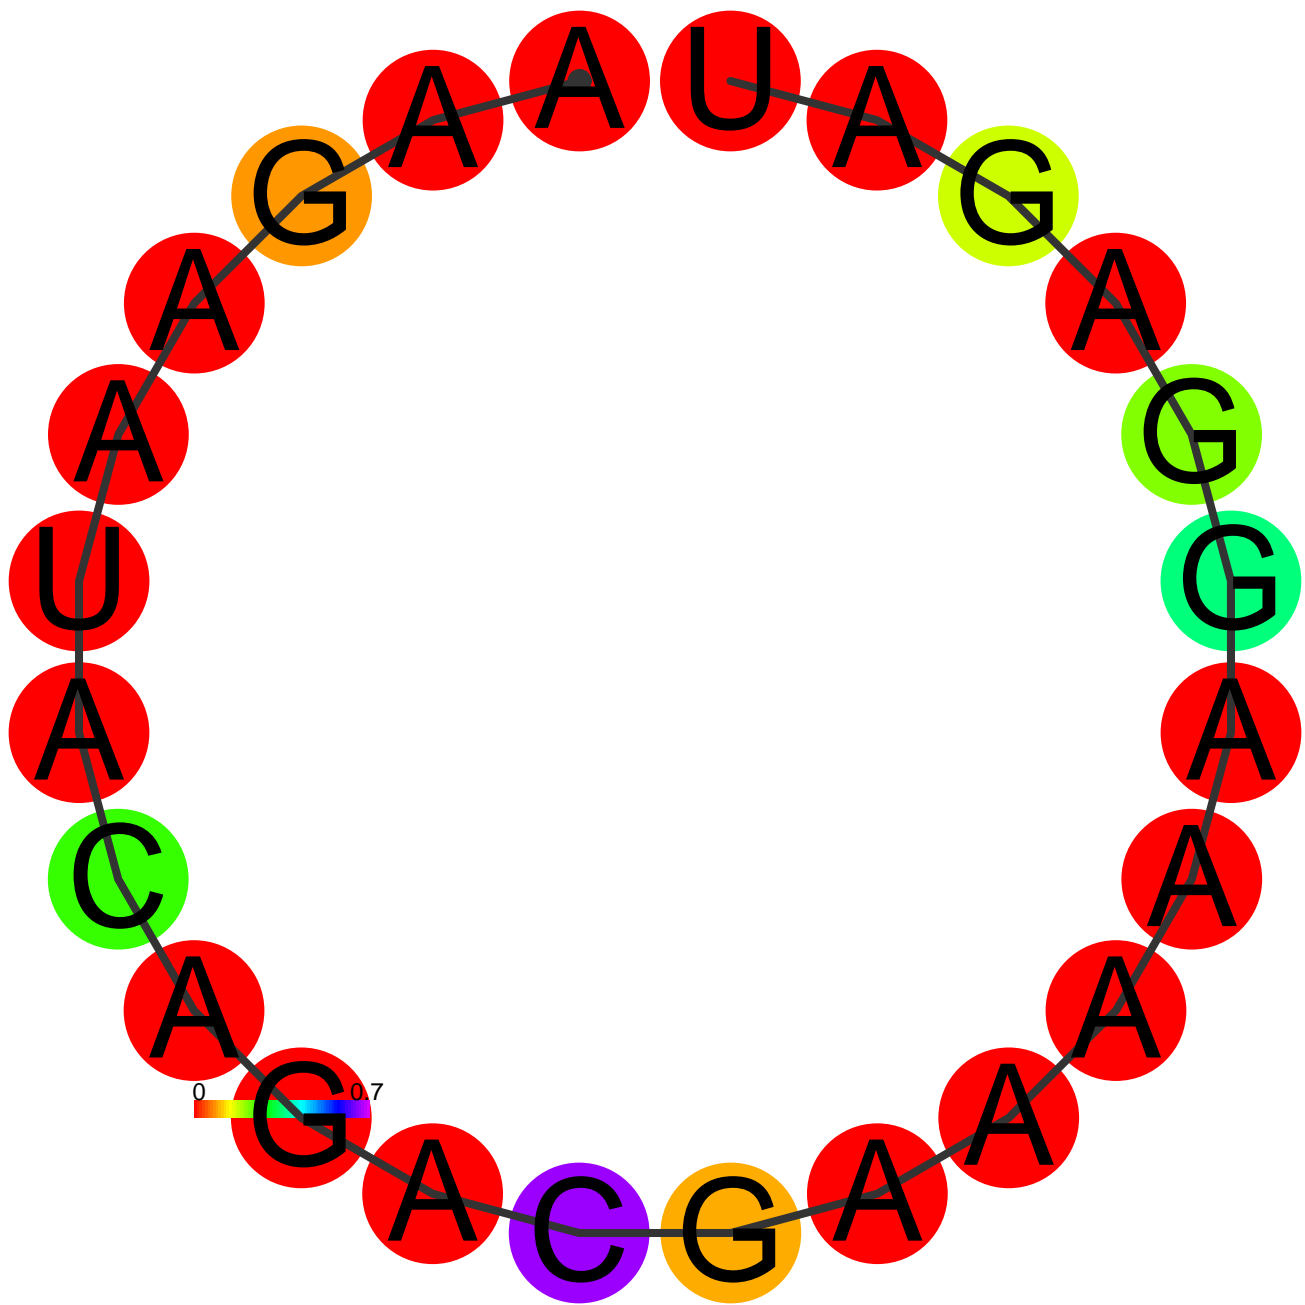

Supplement: Supplementary file 256 [file supplementary]

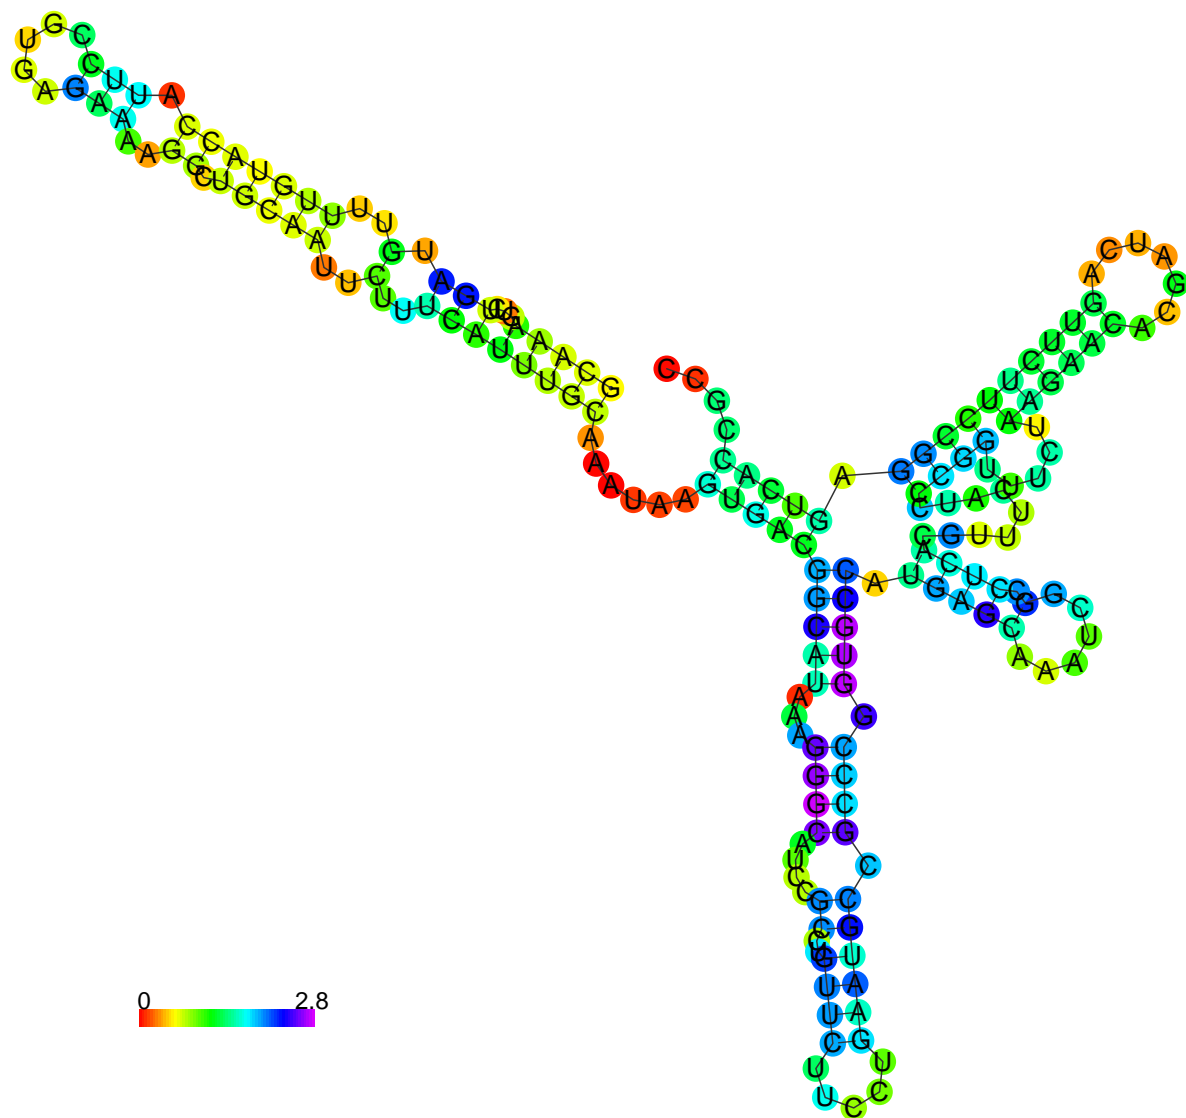

Supplement: Supplementary file 257 [file supplementary]

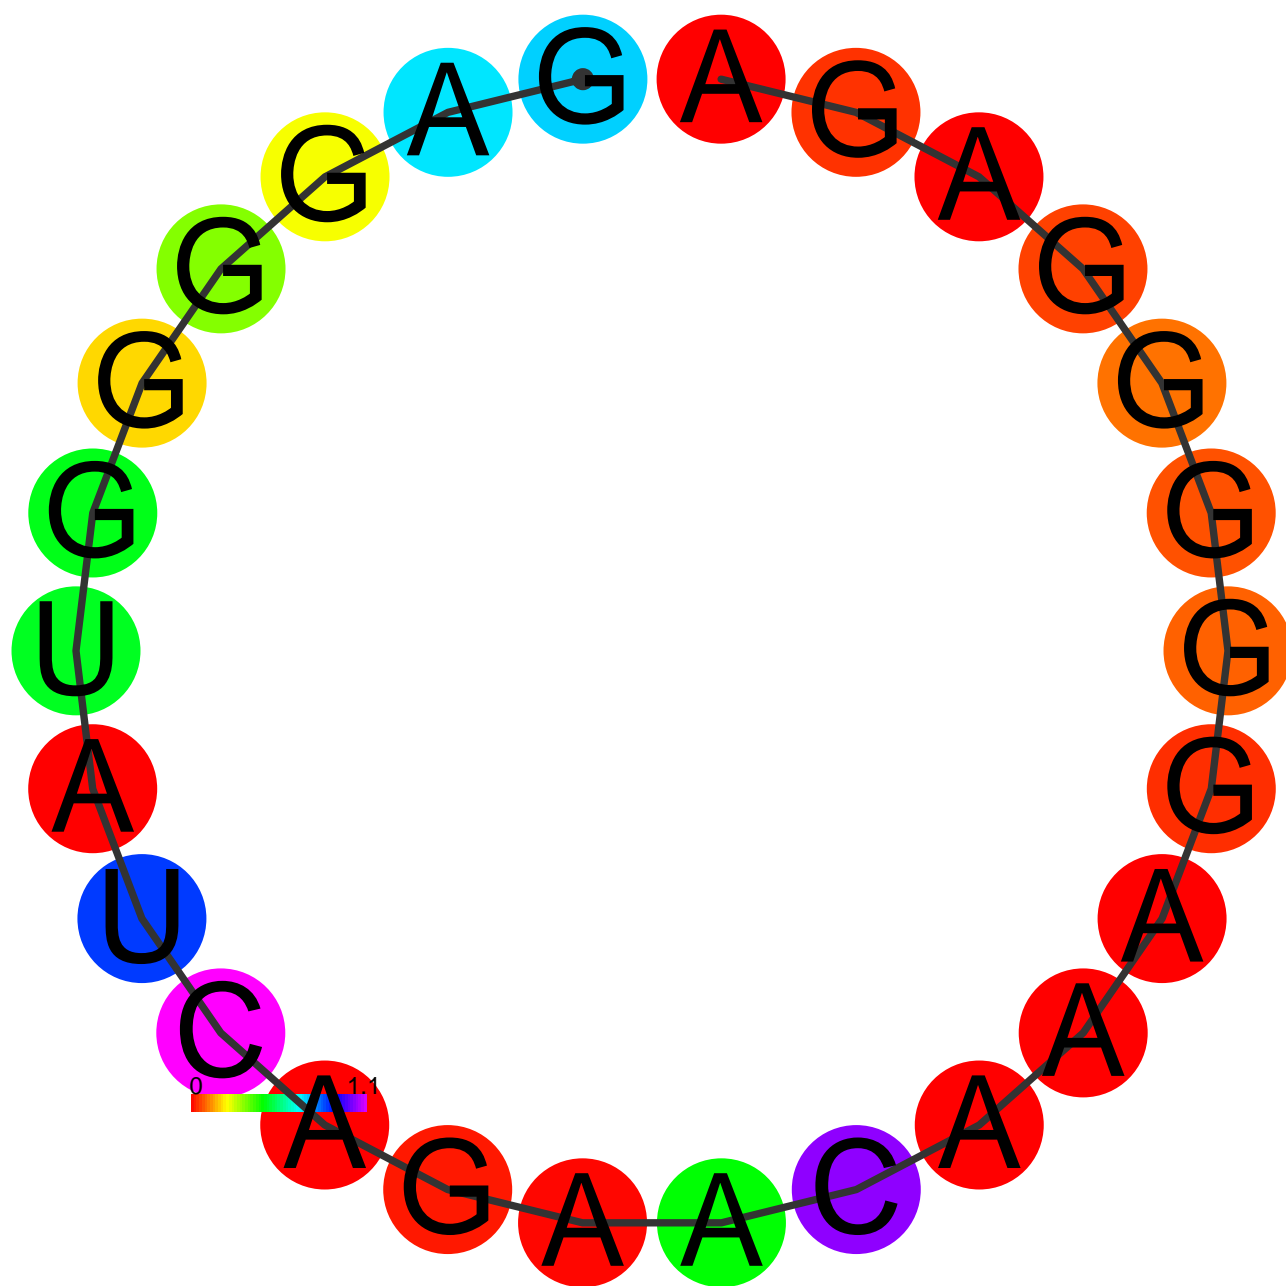

Supplement: Supplementary file 258 [file supplementary]



Supplement: Supplementary file 259 [file supplementary]

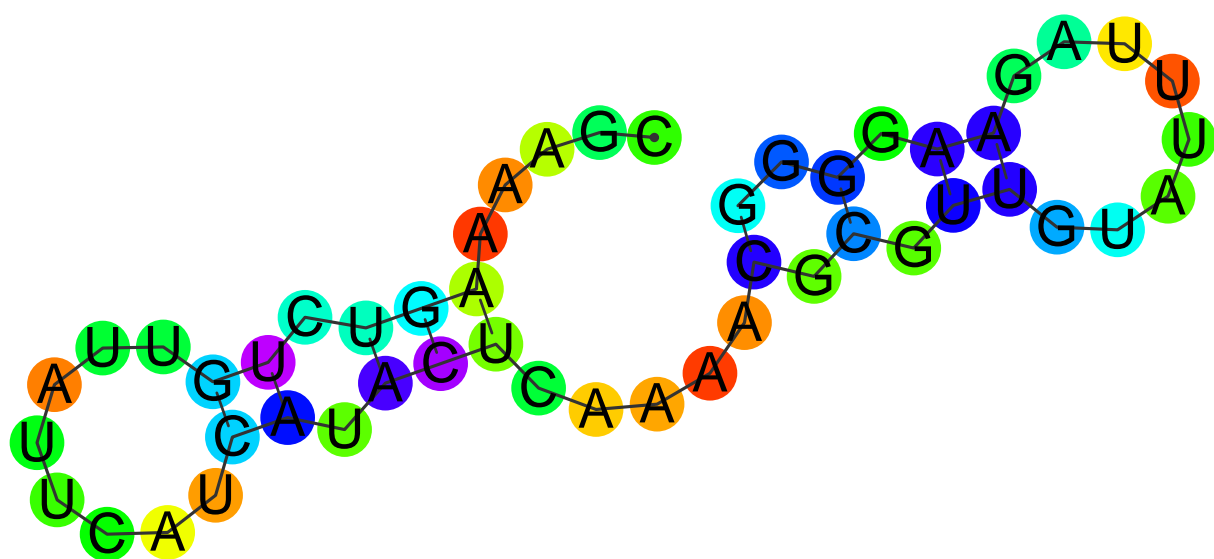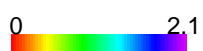

Supplement: Supplementary file 260 [file supplementary]

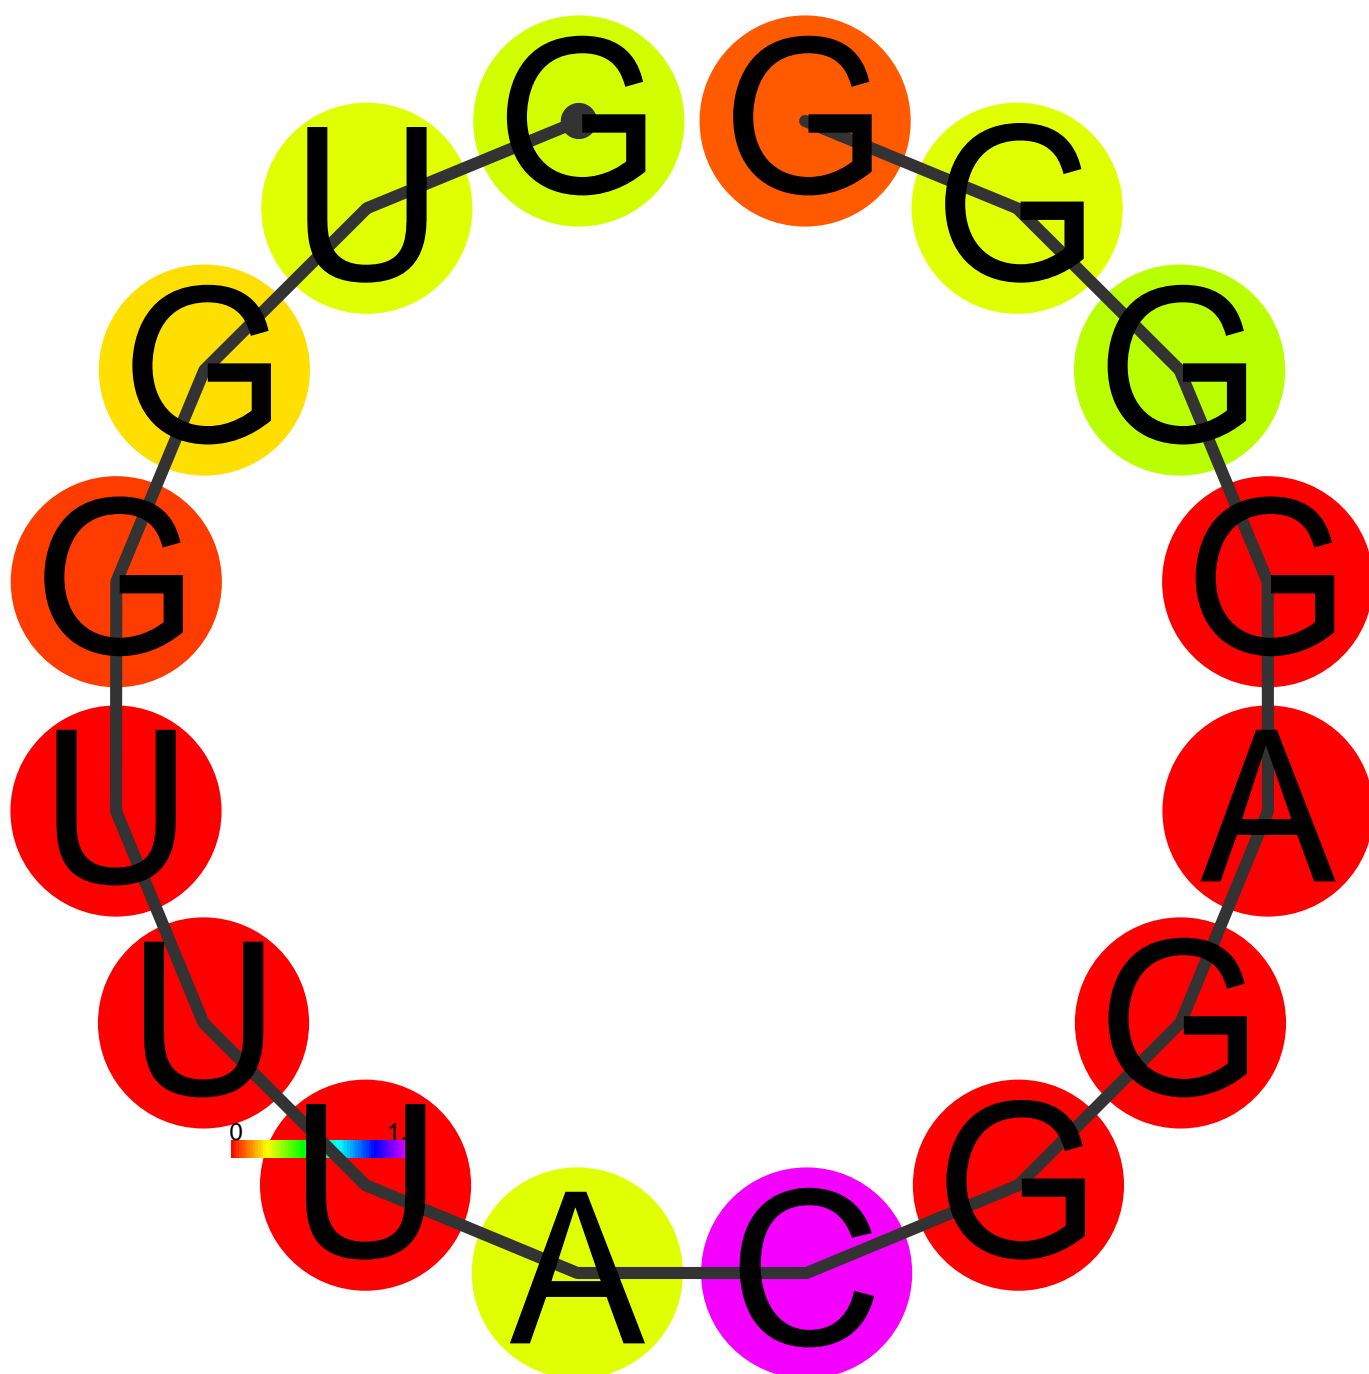

Supplement: Supplementary file 261 [file supplementary]

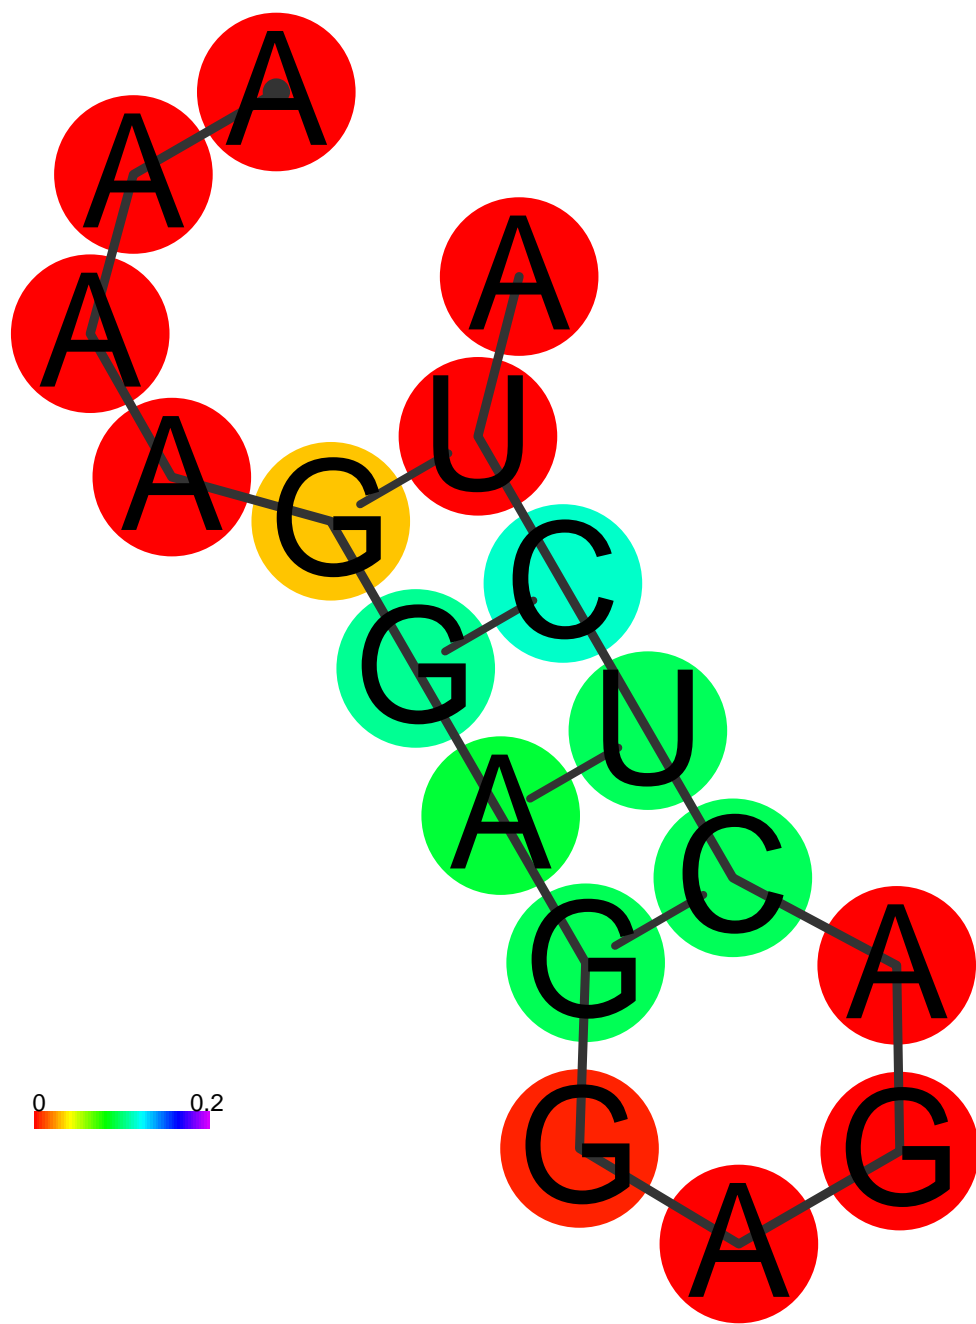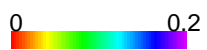

Supplement: Supplementary file 262 [file supplementary]

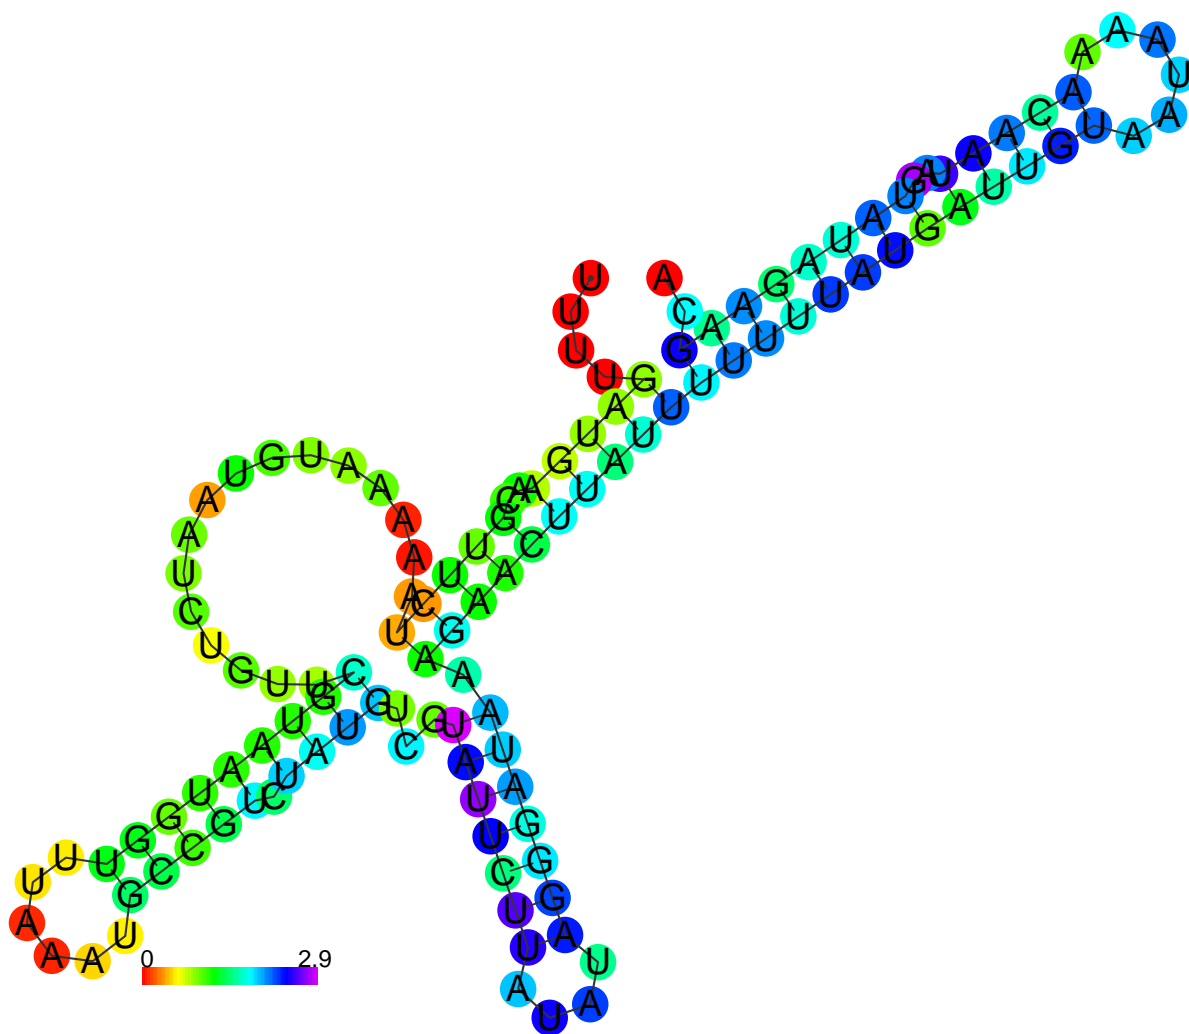

Supplement: Supplementary file 263 [file supplementary]

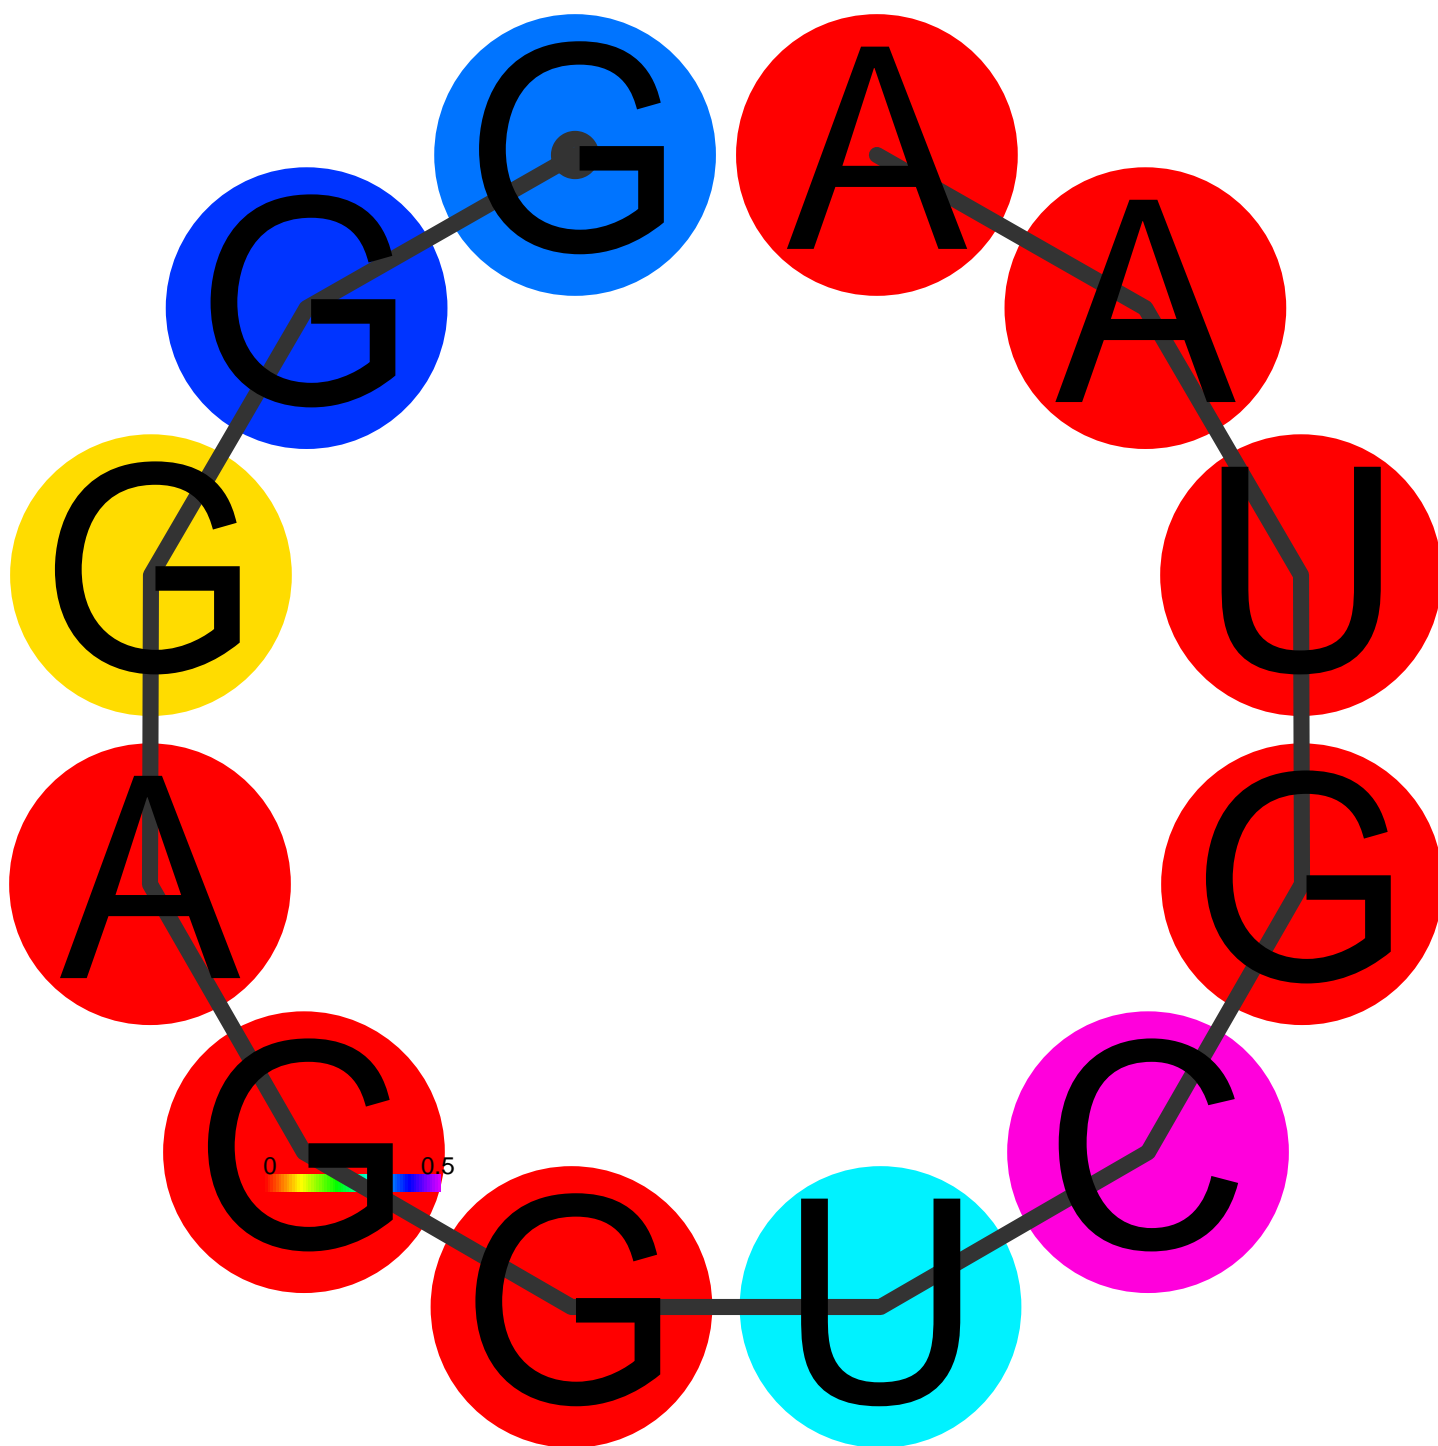

Supplement: Supplementary file 264 [file supplementary]

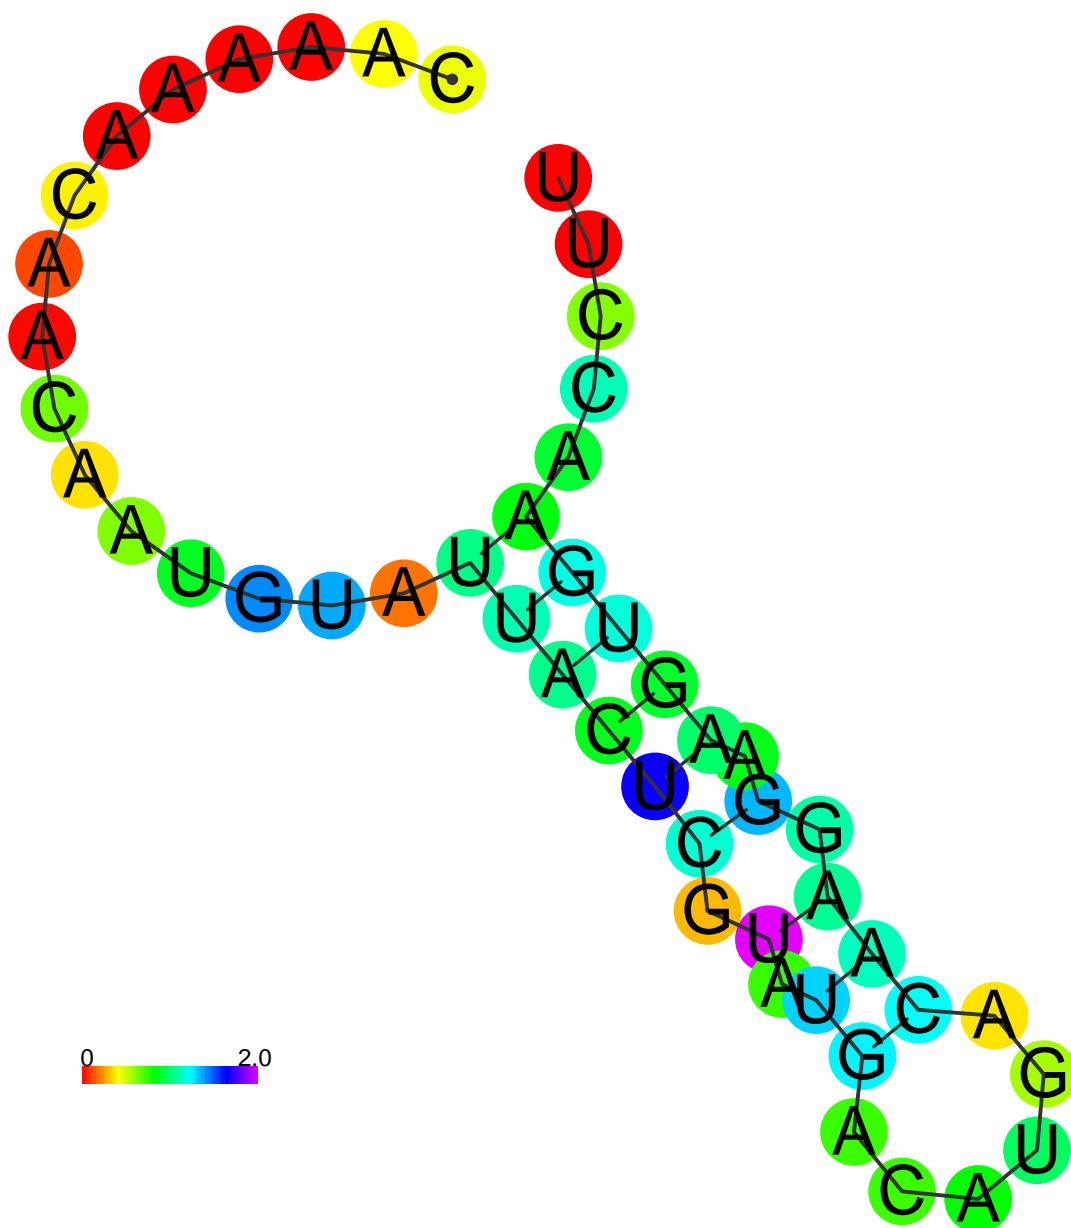

Supplement: Supplementary file 265 [file supplementary]

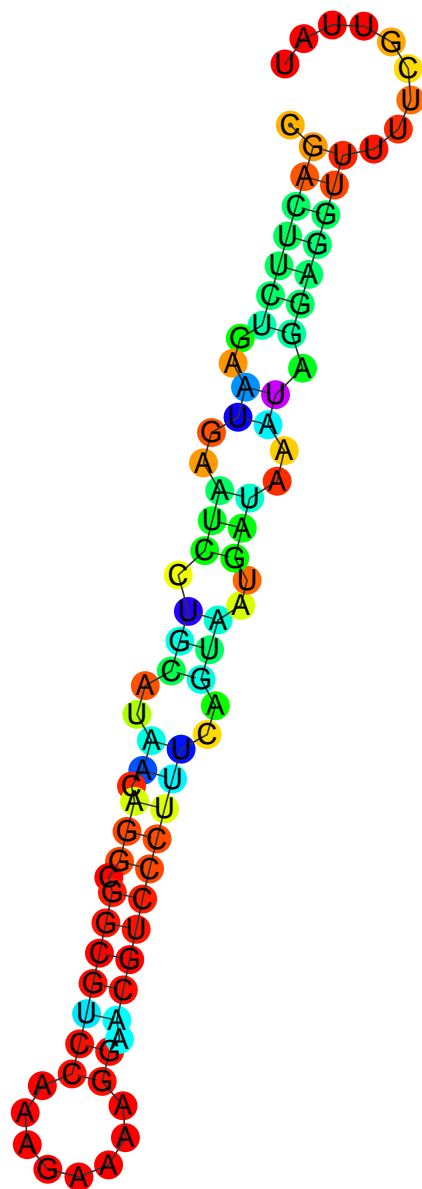

Supplement: Supplementary file 266 [file supplementary]

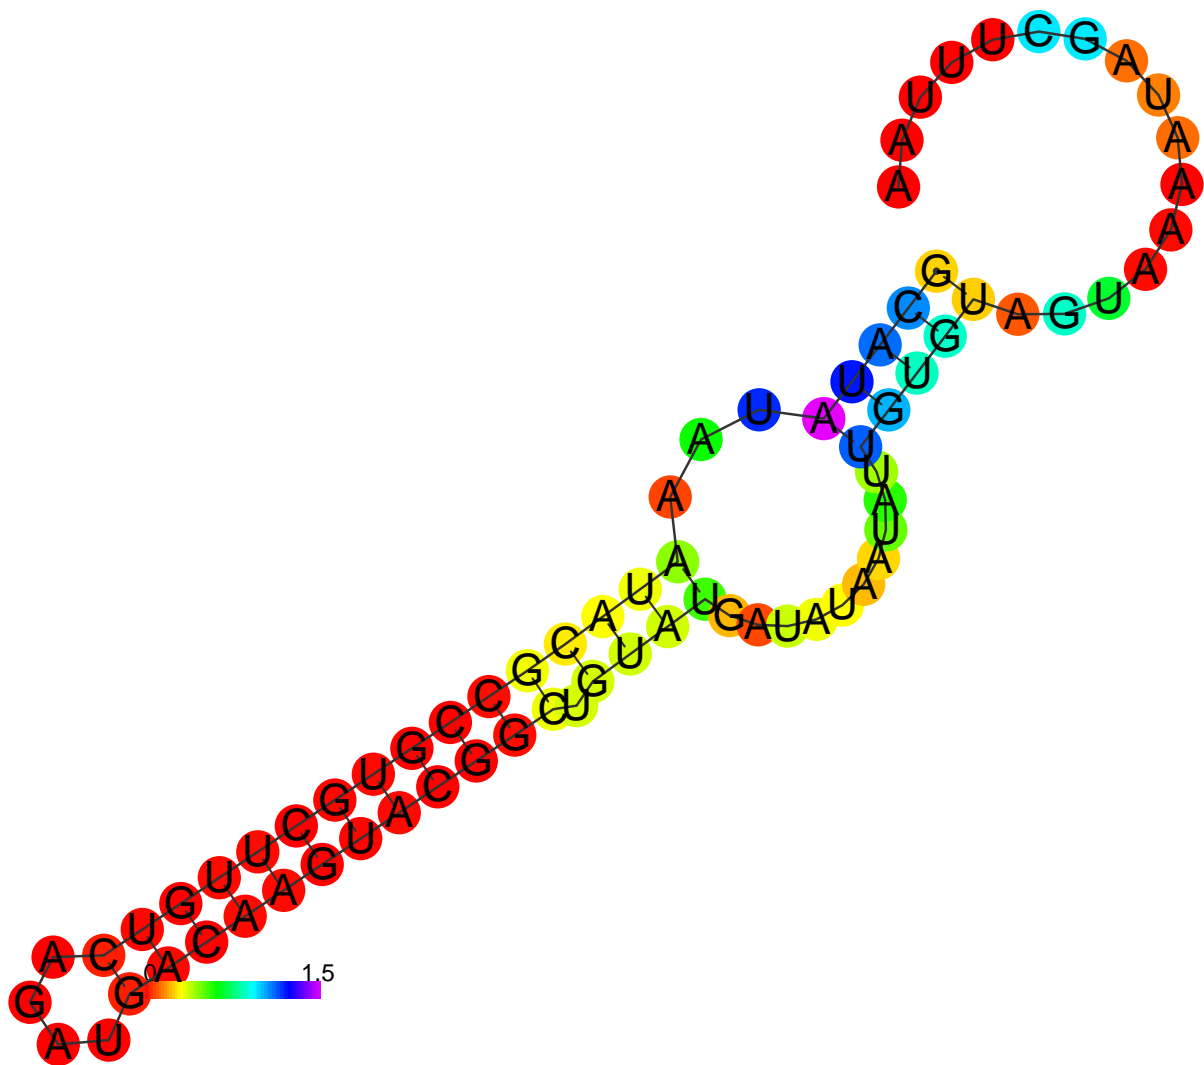

Supplement: Supplementary file 267 [file supplementary]

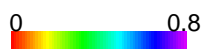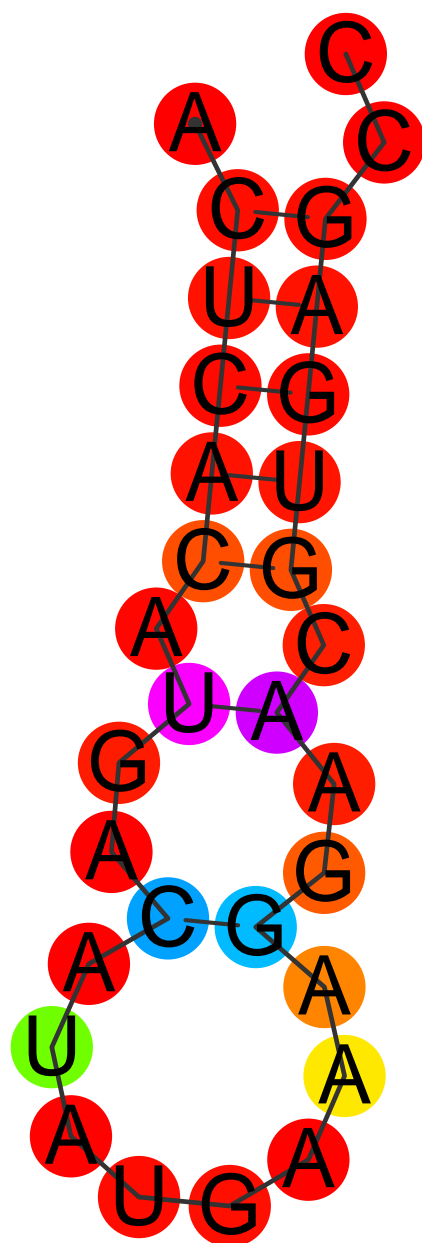

Supplement: Supplementary file 268 [file supplementary]

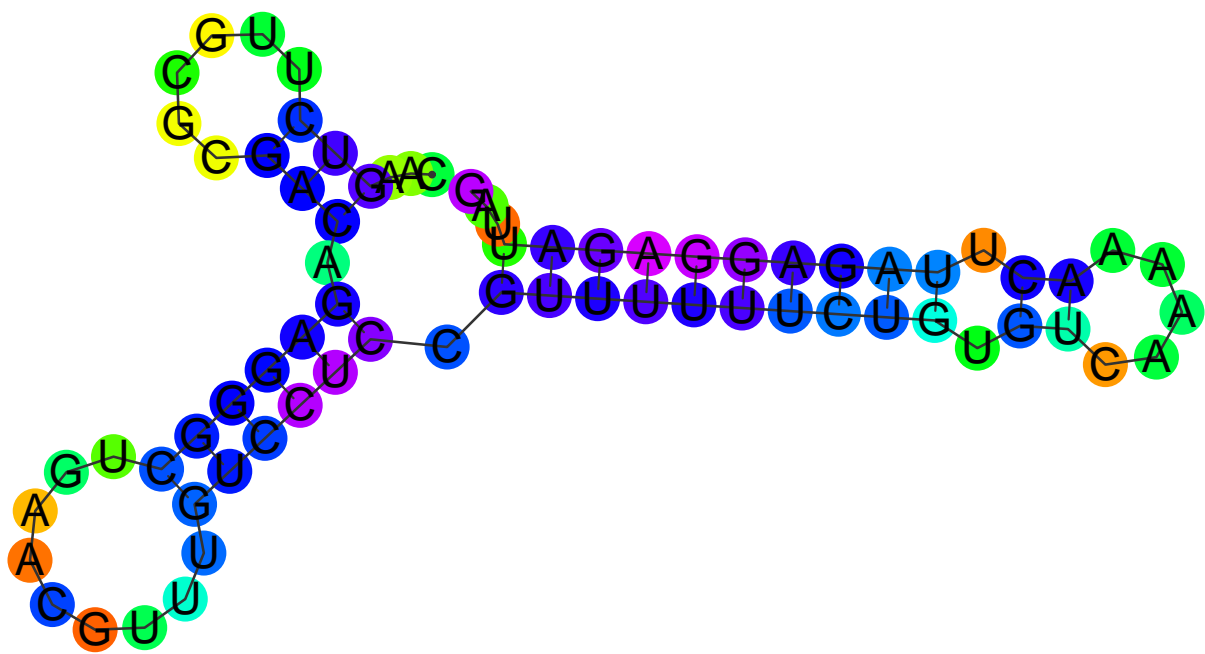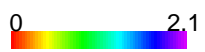

Supplement: Supplementary file 269 [file supplementary]

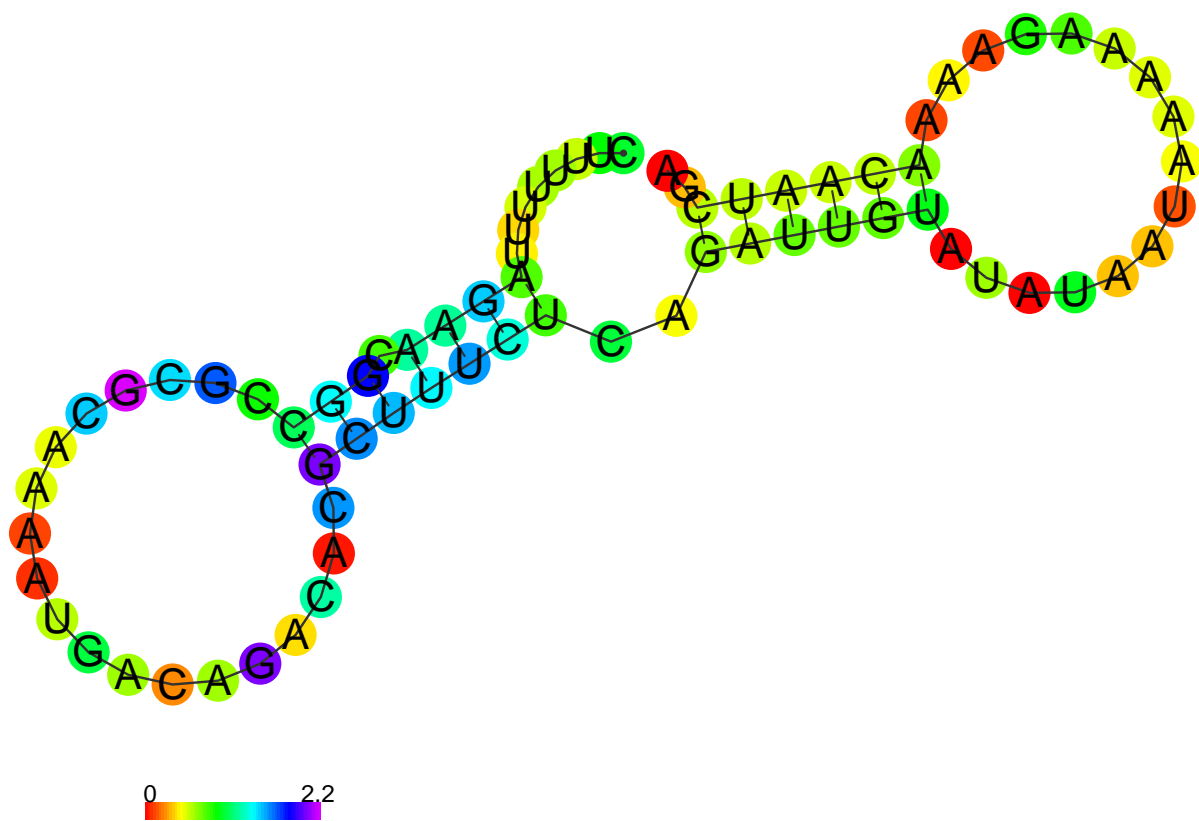

Supplement: Supplementary file 270 [file supplementary]

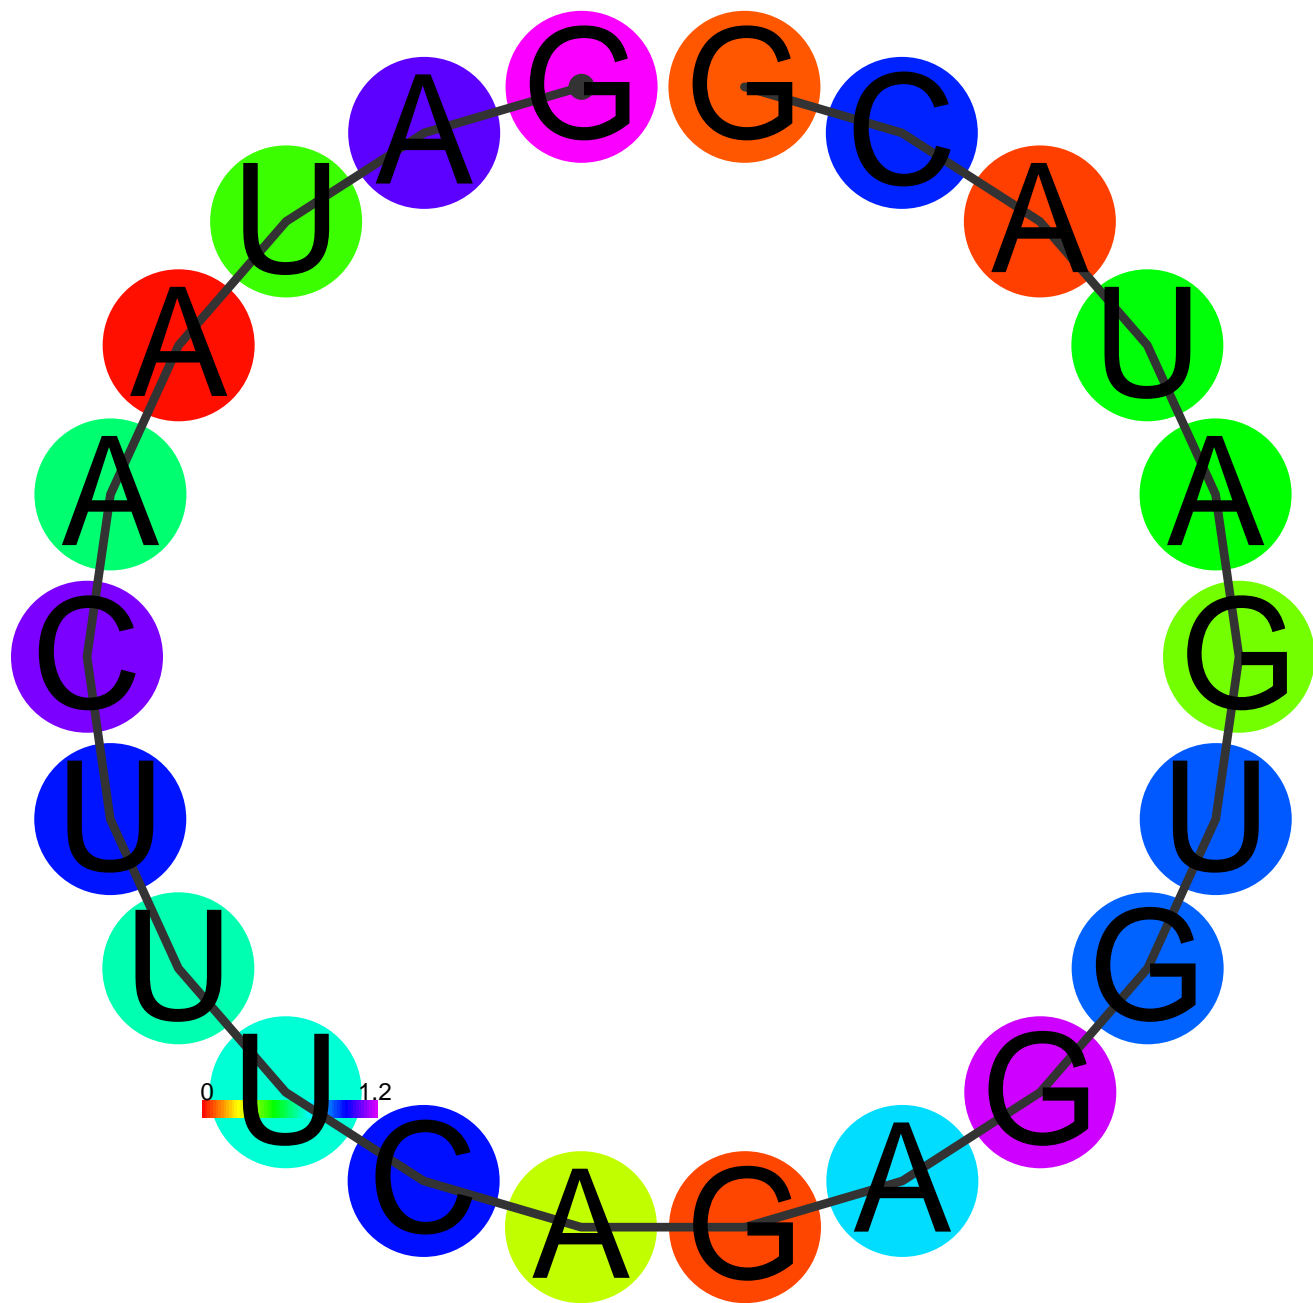

Supplement: Supplementary file 271 [file supplementary]

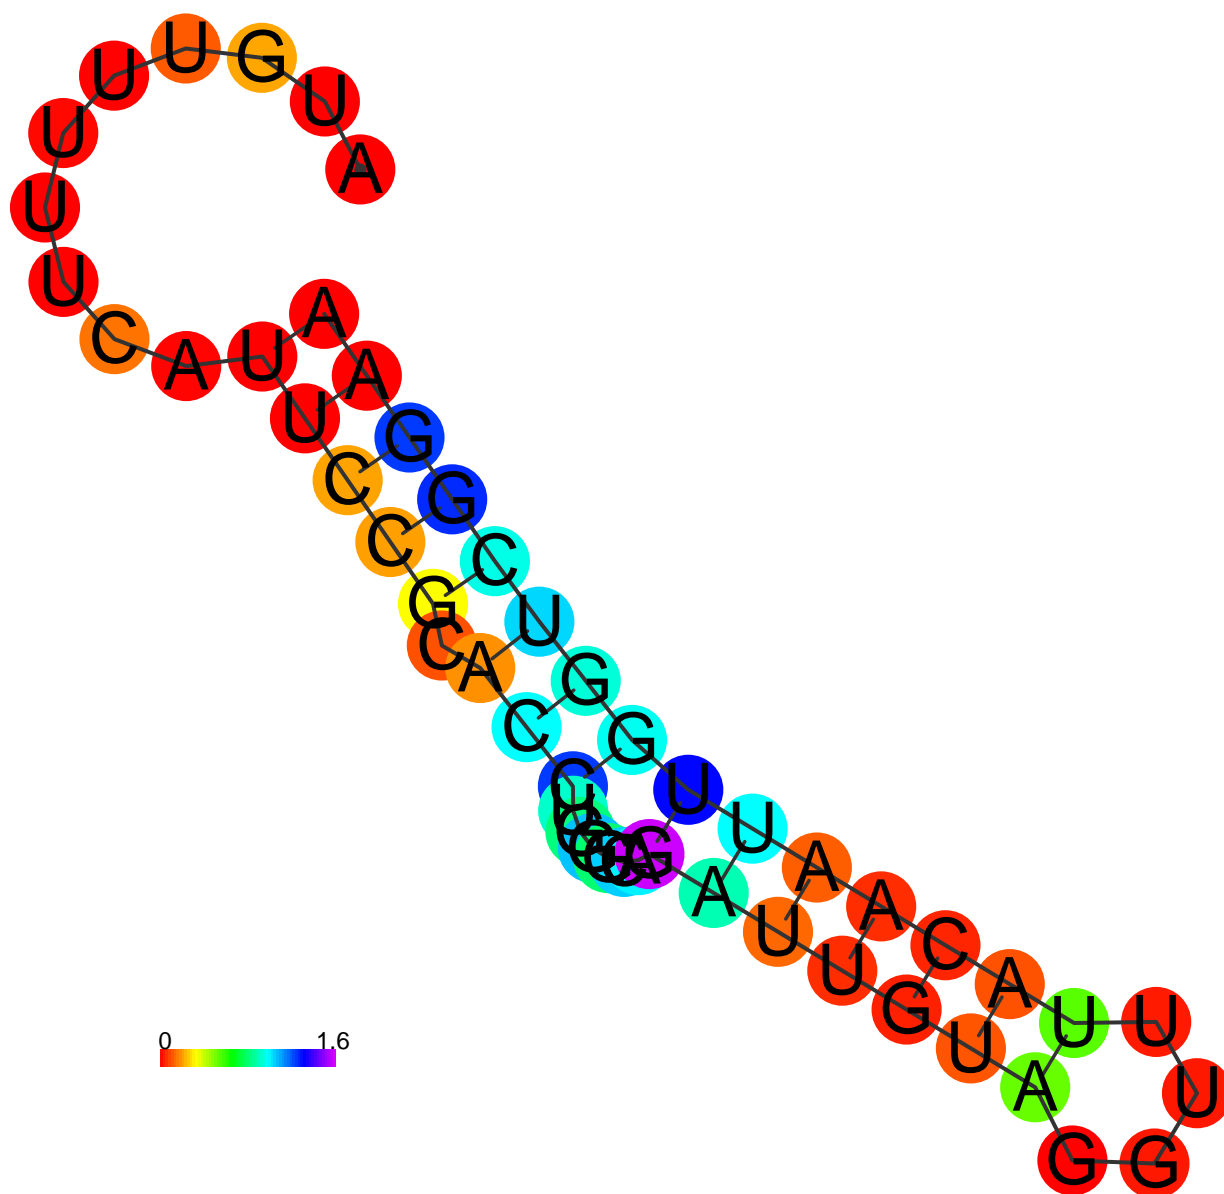

Supplement: Supplementary file 272 [file supplementary]

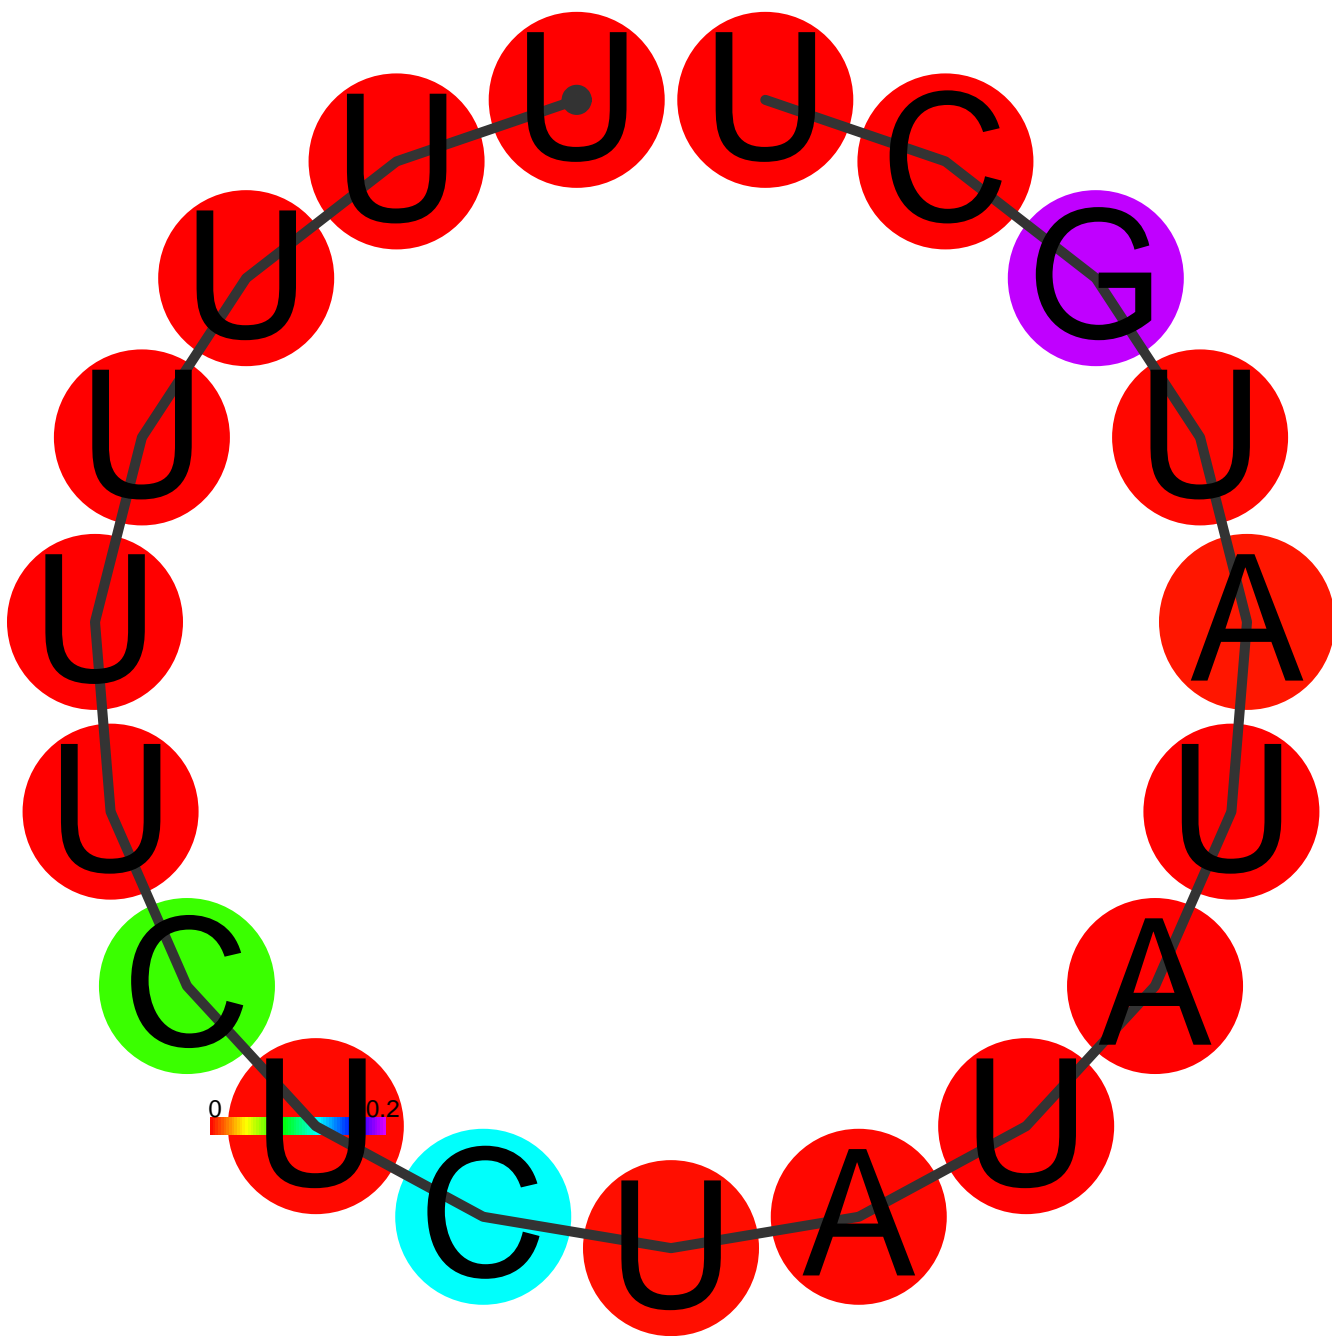

Supplement: Supplementary file 273 [file supplementary]

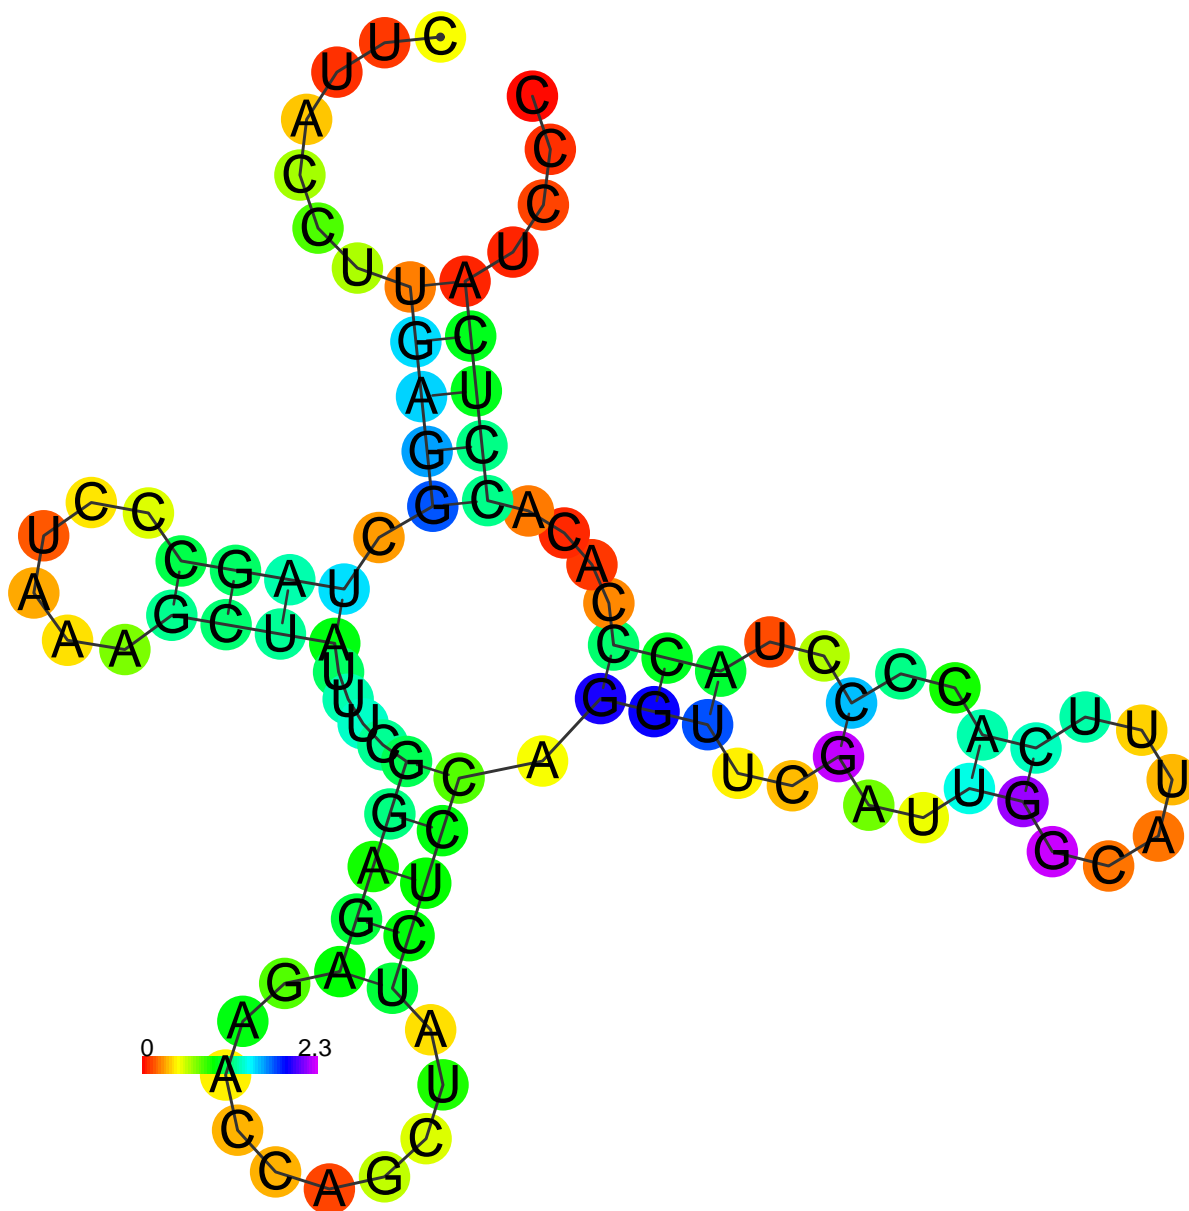

Supplement: Supplementary file 274 [file supplementary]

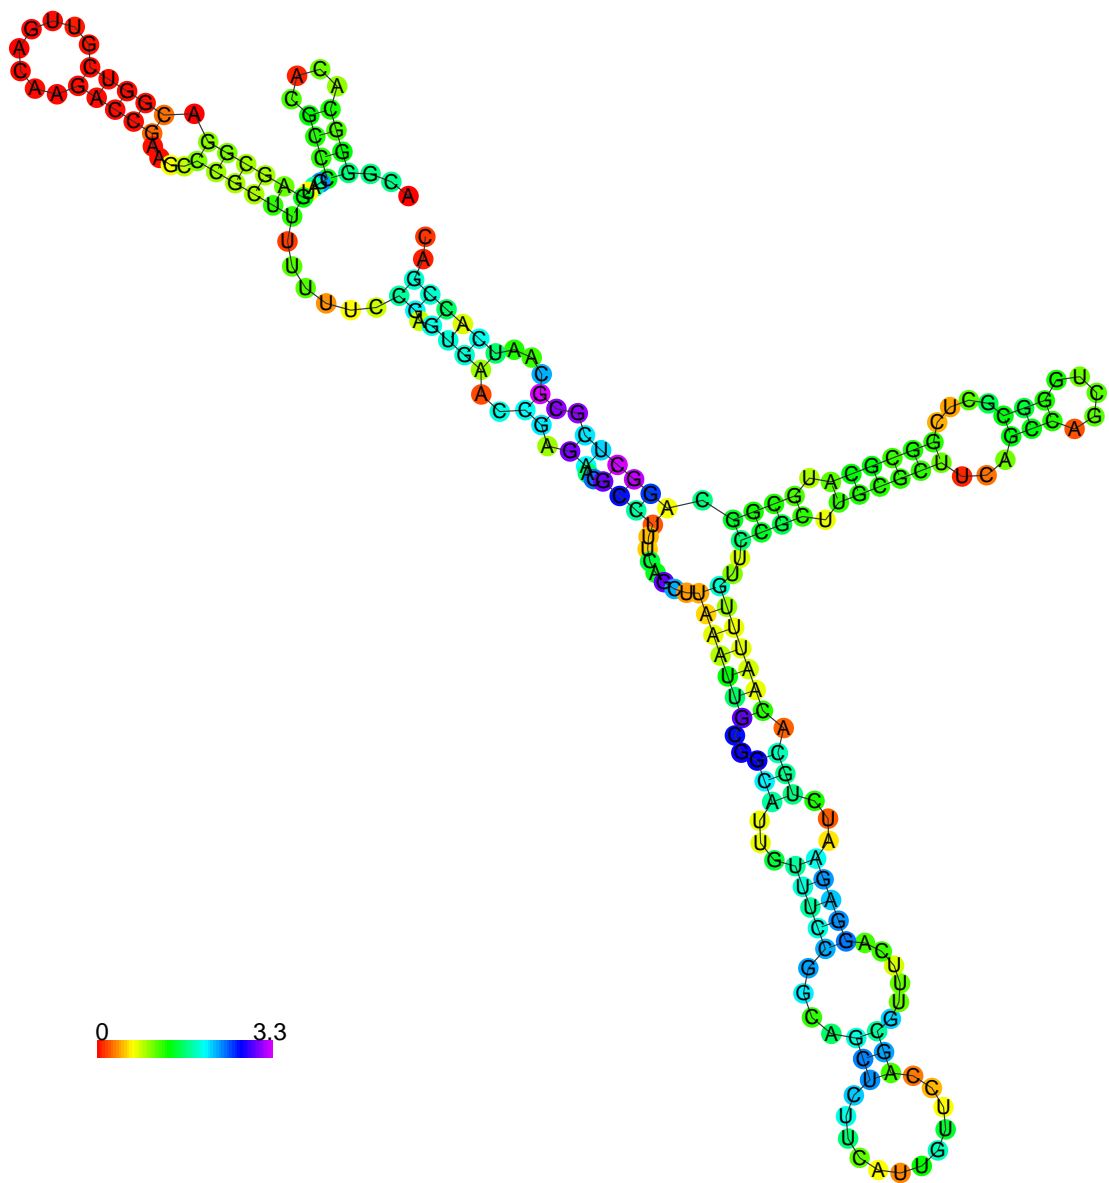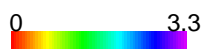

Supplement: Supplementary file 275 [file supplementary]

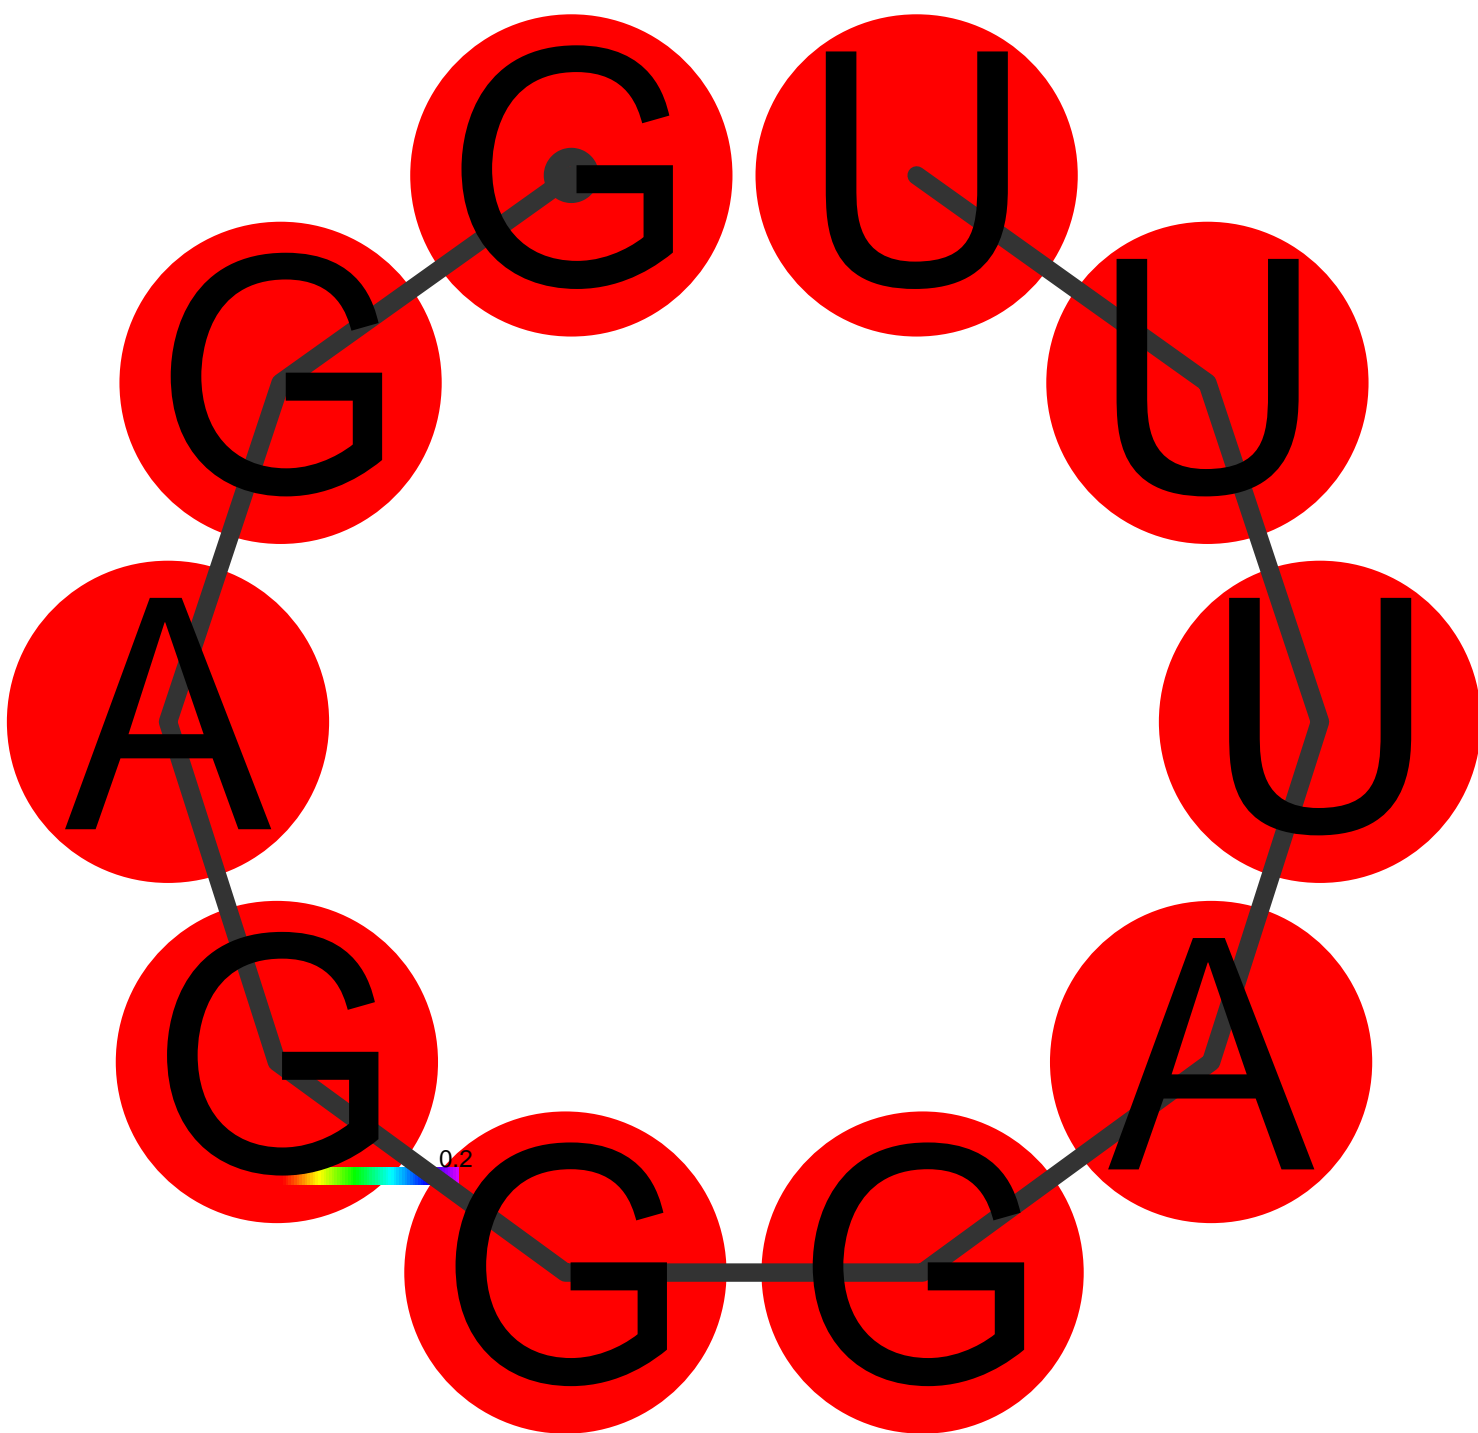

Supplement: Supplementary file 276 [file supplementary]

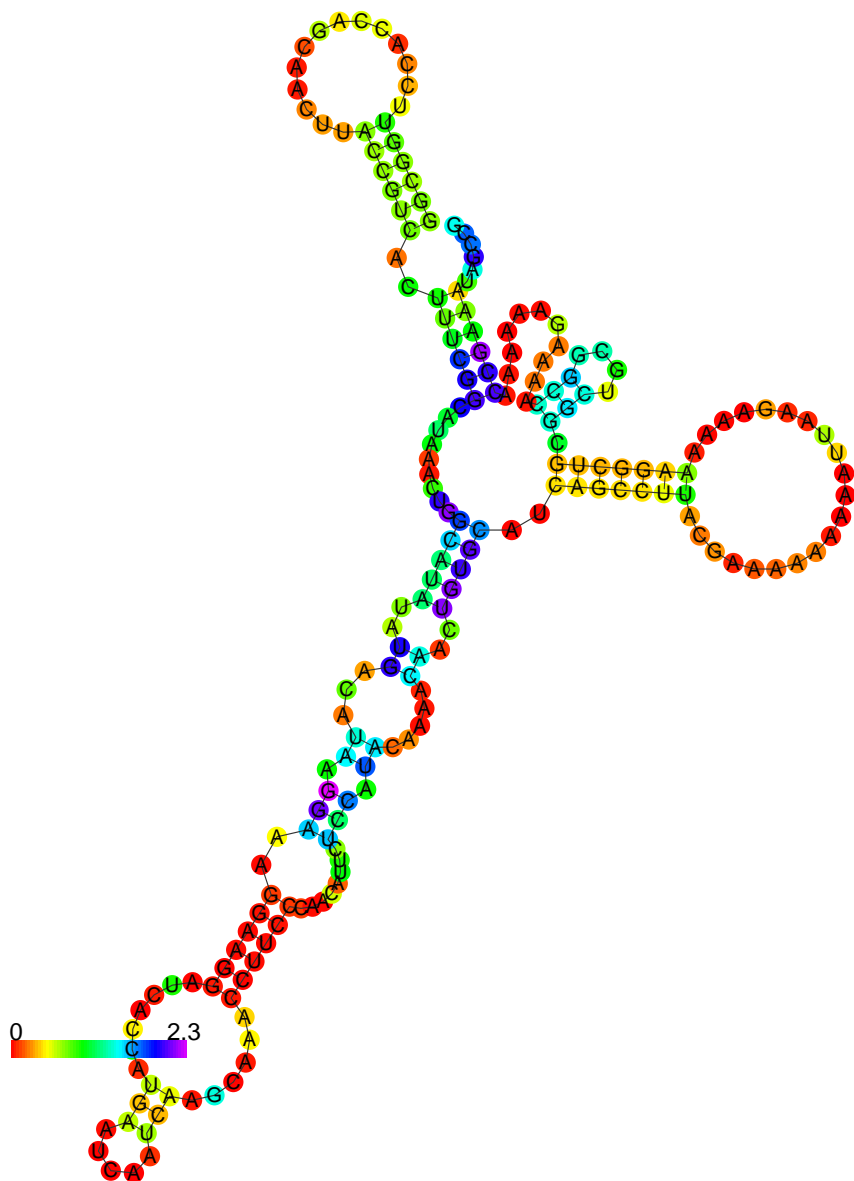

Supplement: Supplementary file 277 [file supplementary]

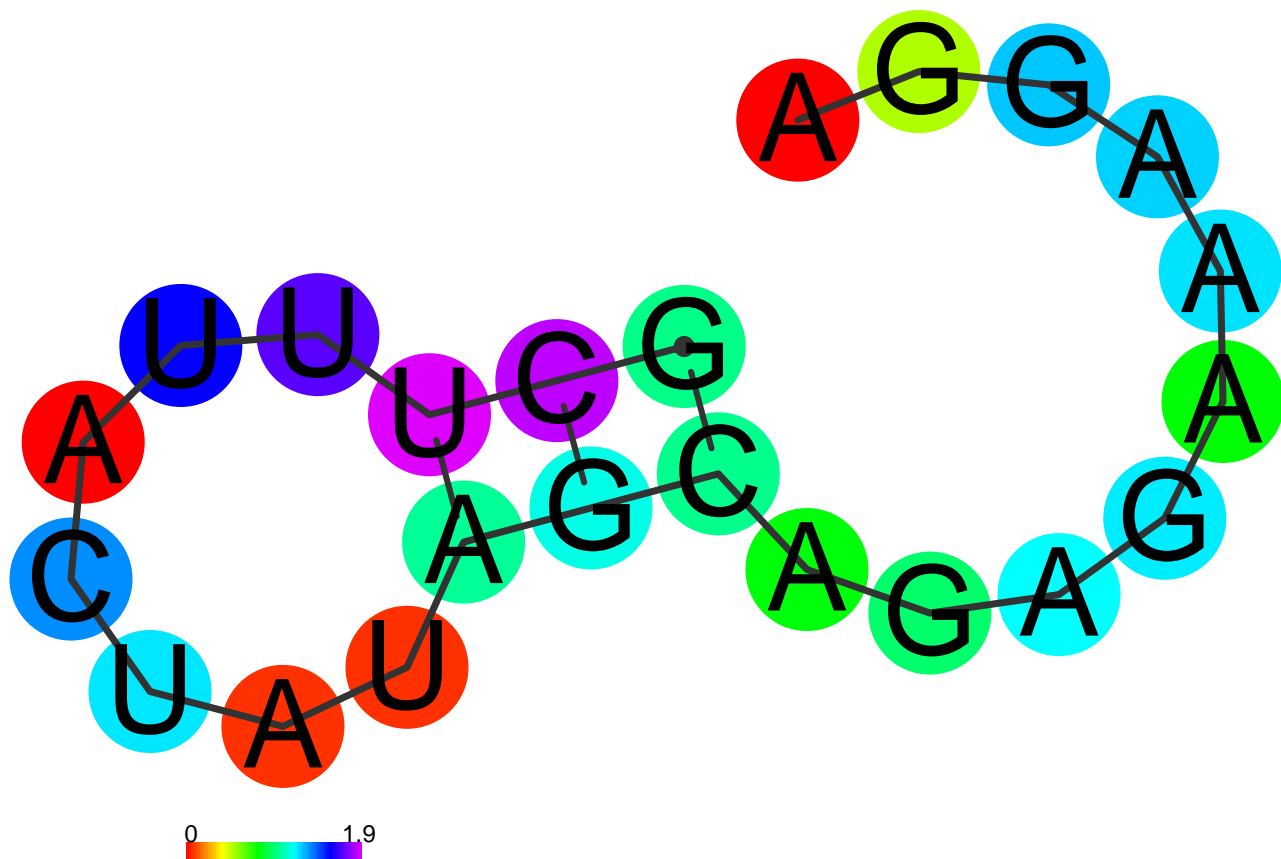

Supplement: Supplementary file 278 [file supplementary]

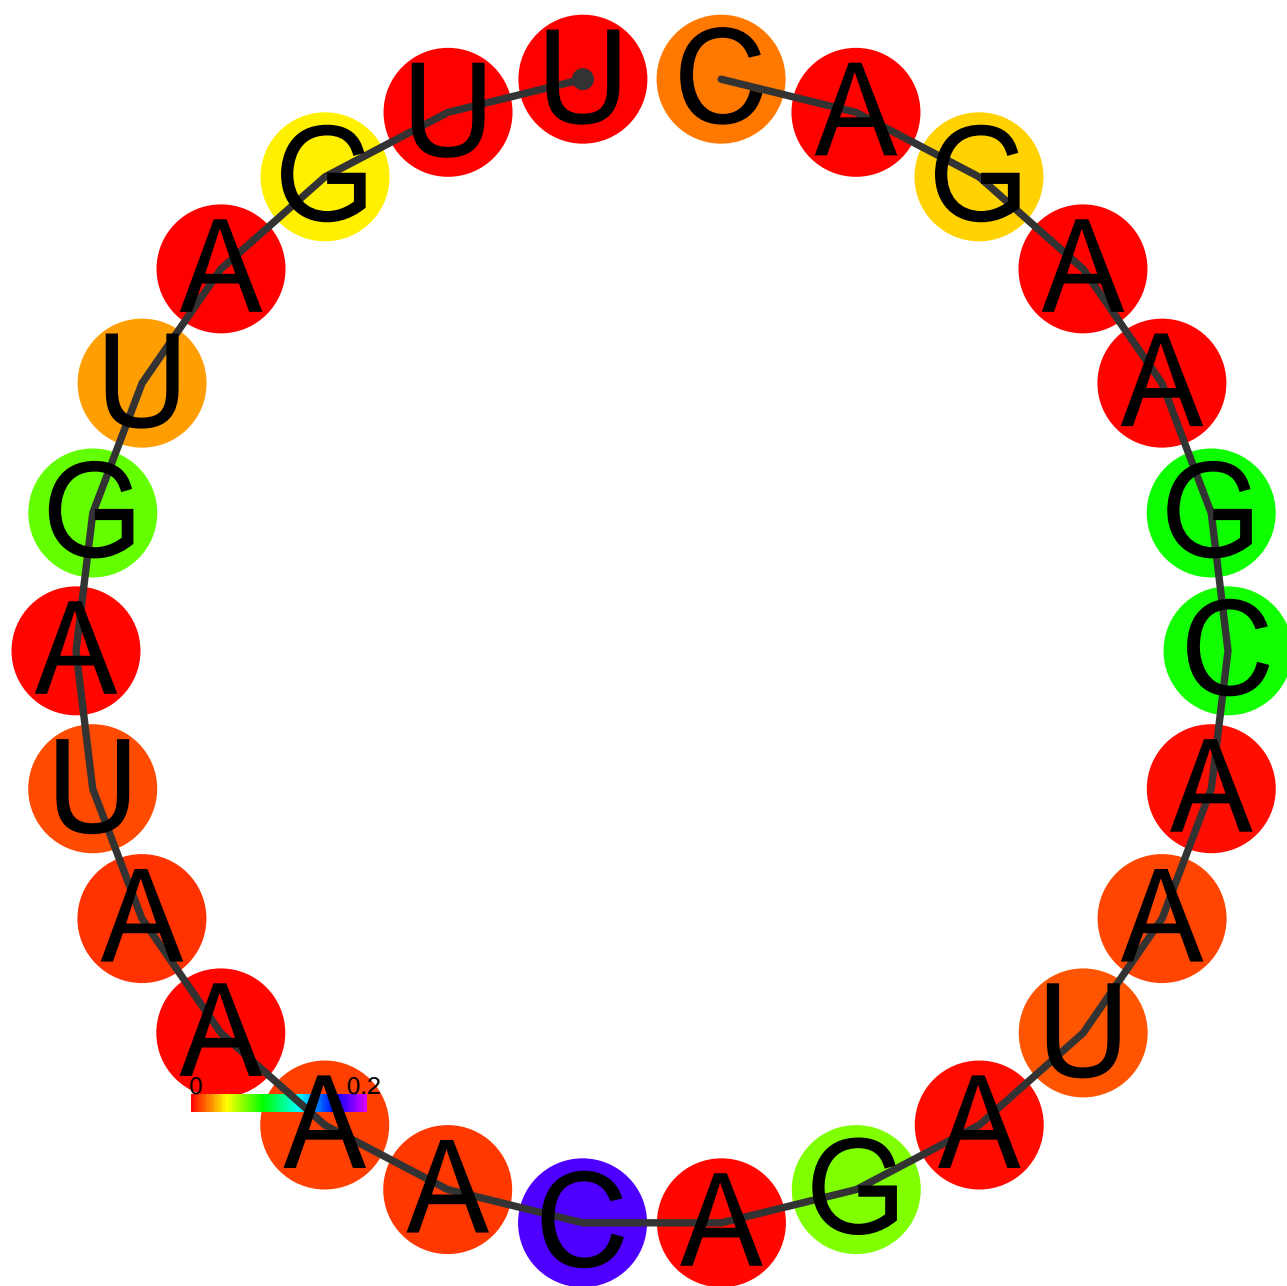

Supplement: Supplementary file 279 [file supplementary]

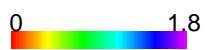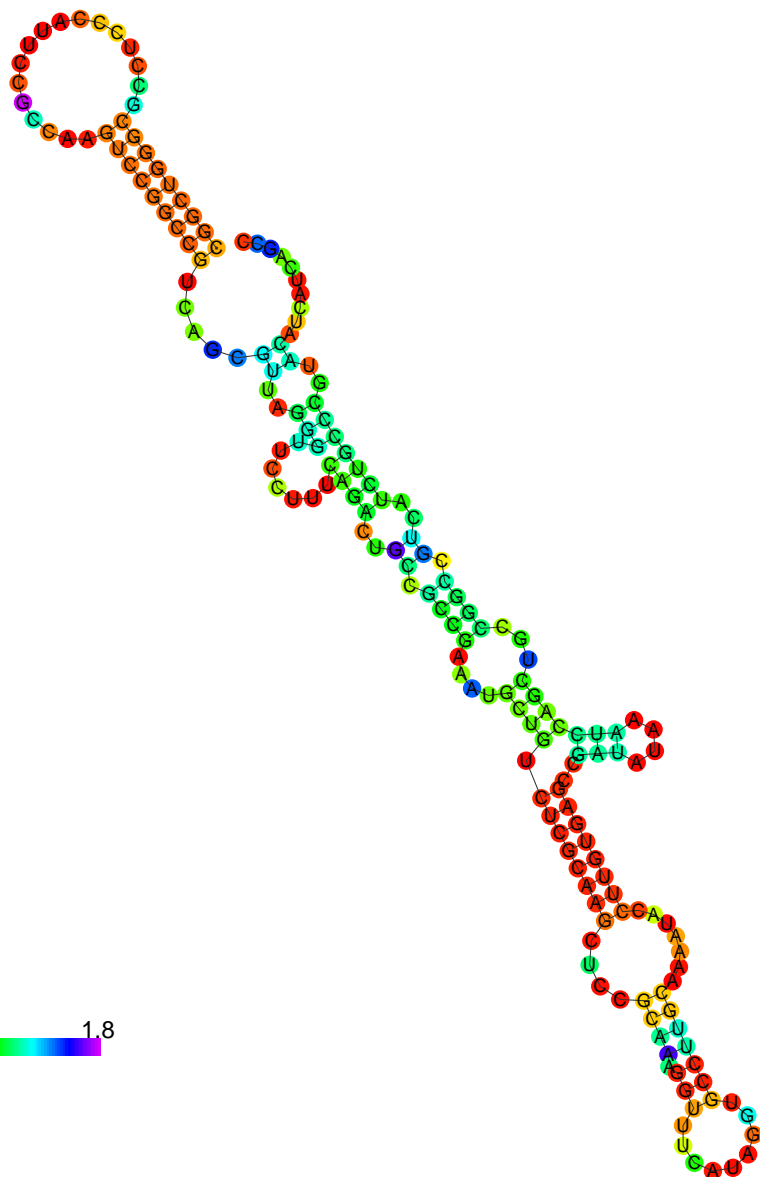

Supplement: Supplementary file 280 [file supplementary]

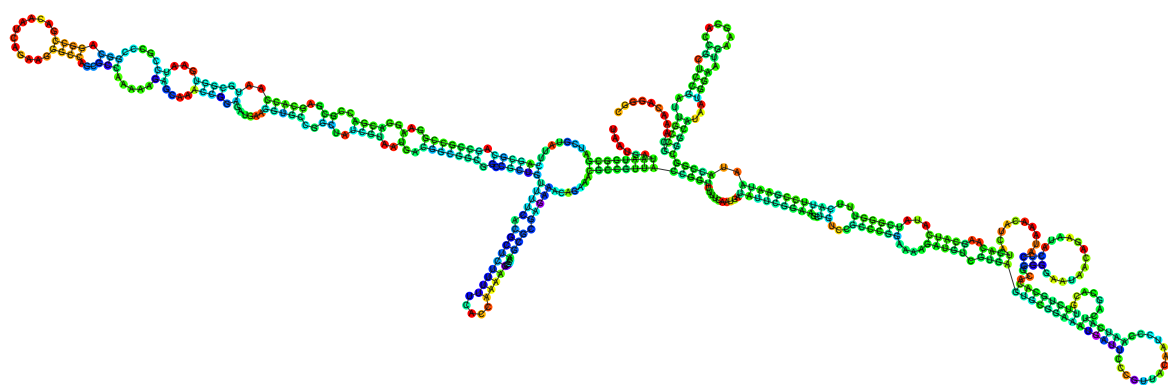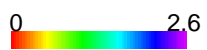

Supplement: Supplementary file 281 [file supplementary]

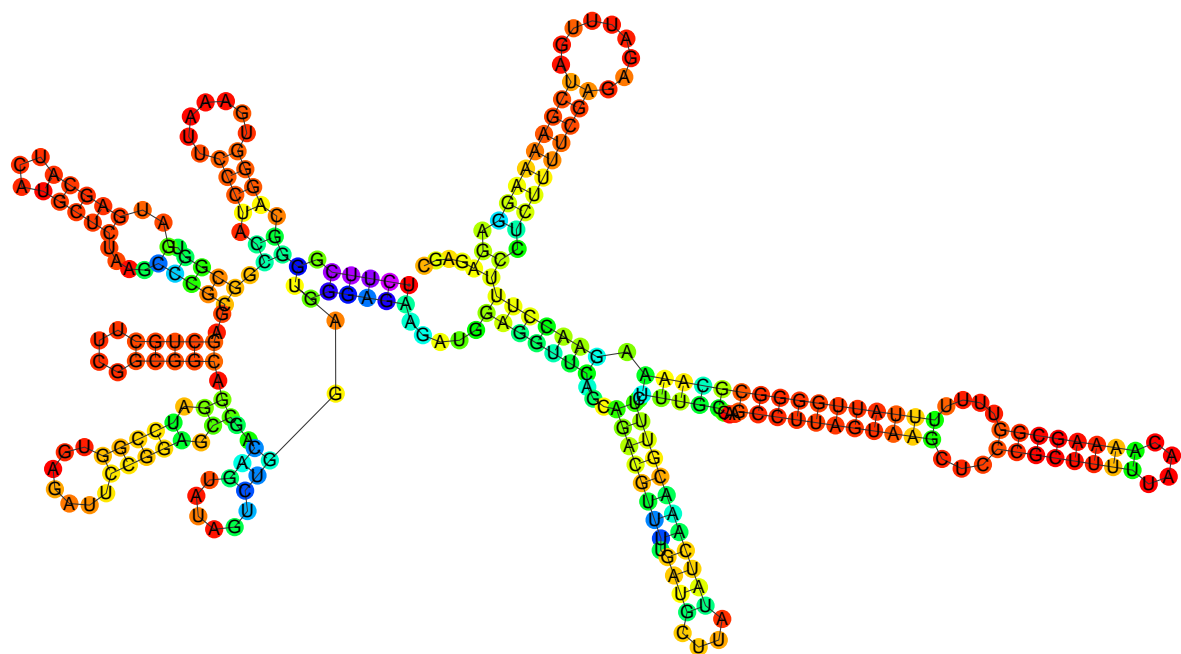

Supplement: Supplementary file 282 [file supplementary]

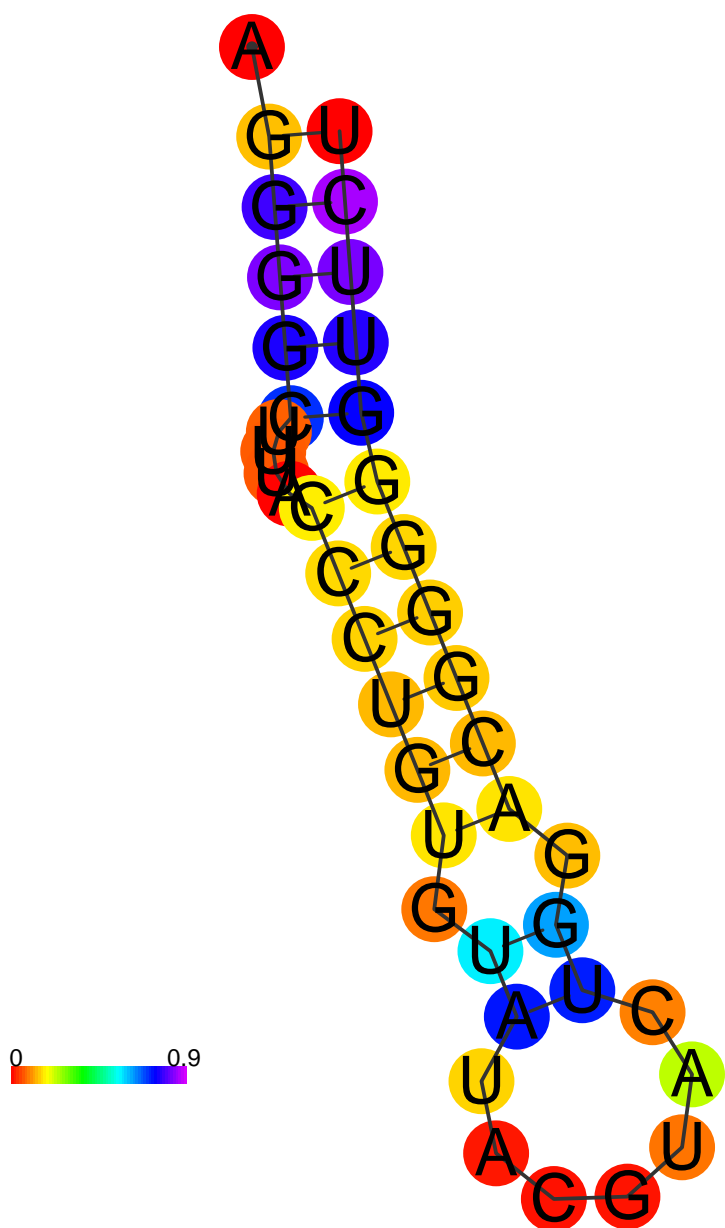

Supplement: Supplementary file 283 [file supplementary]

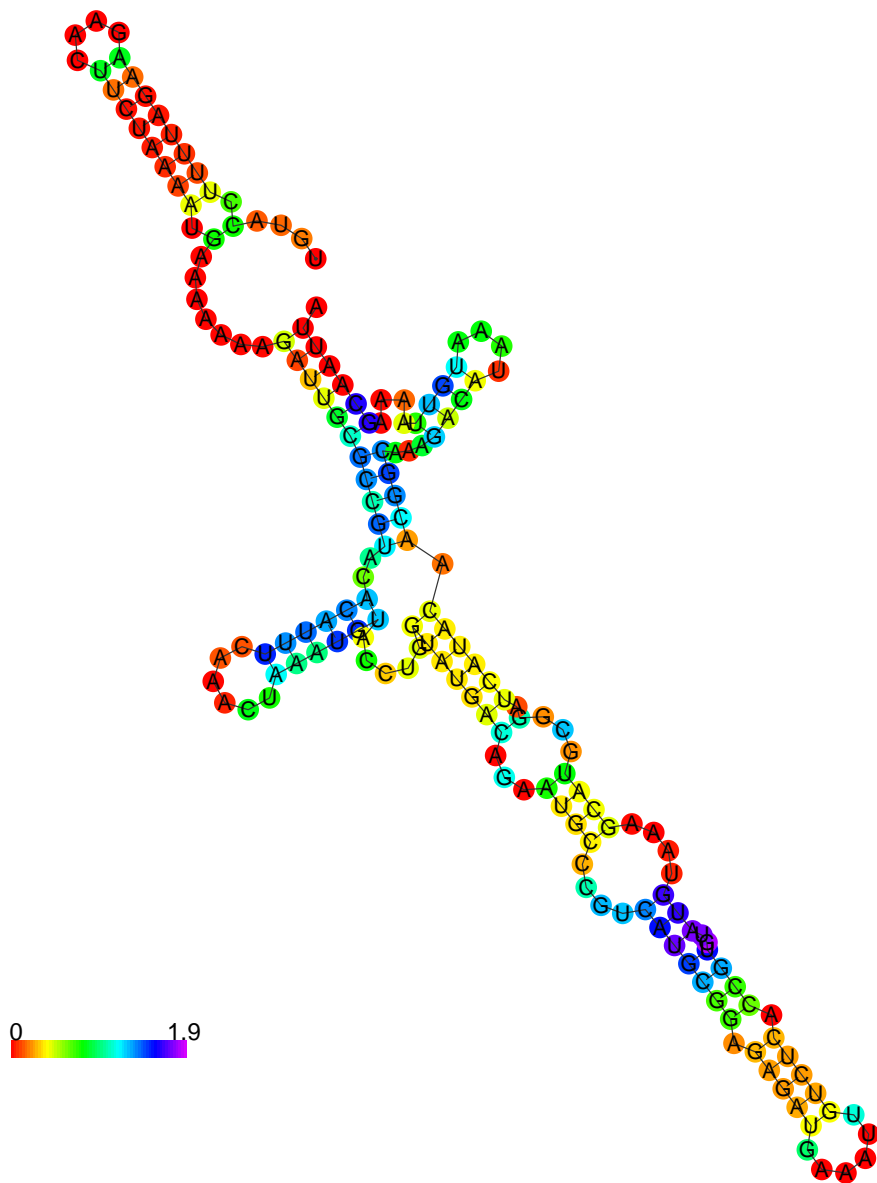

Supplement: Supplementary file 284 [file supplementary]

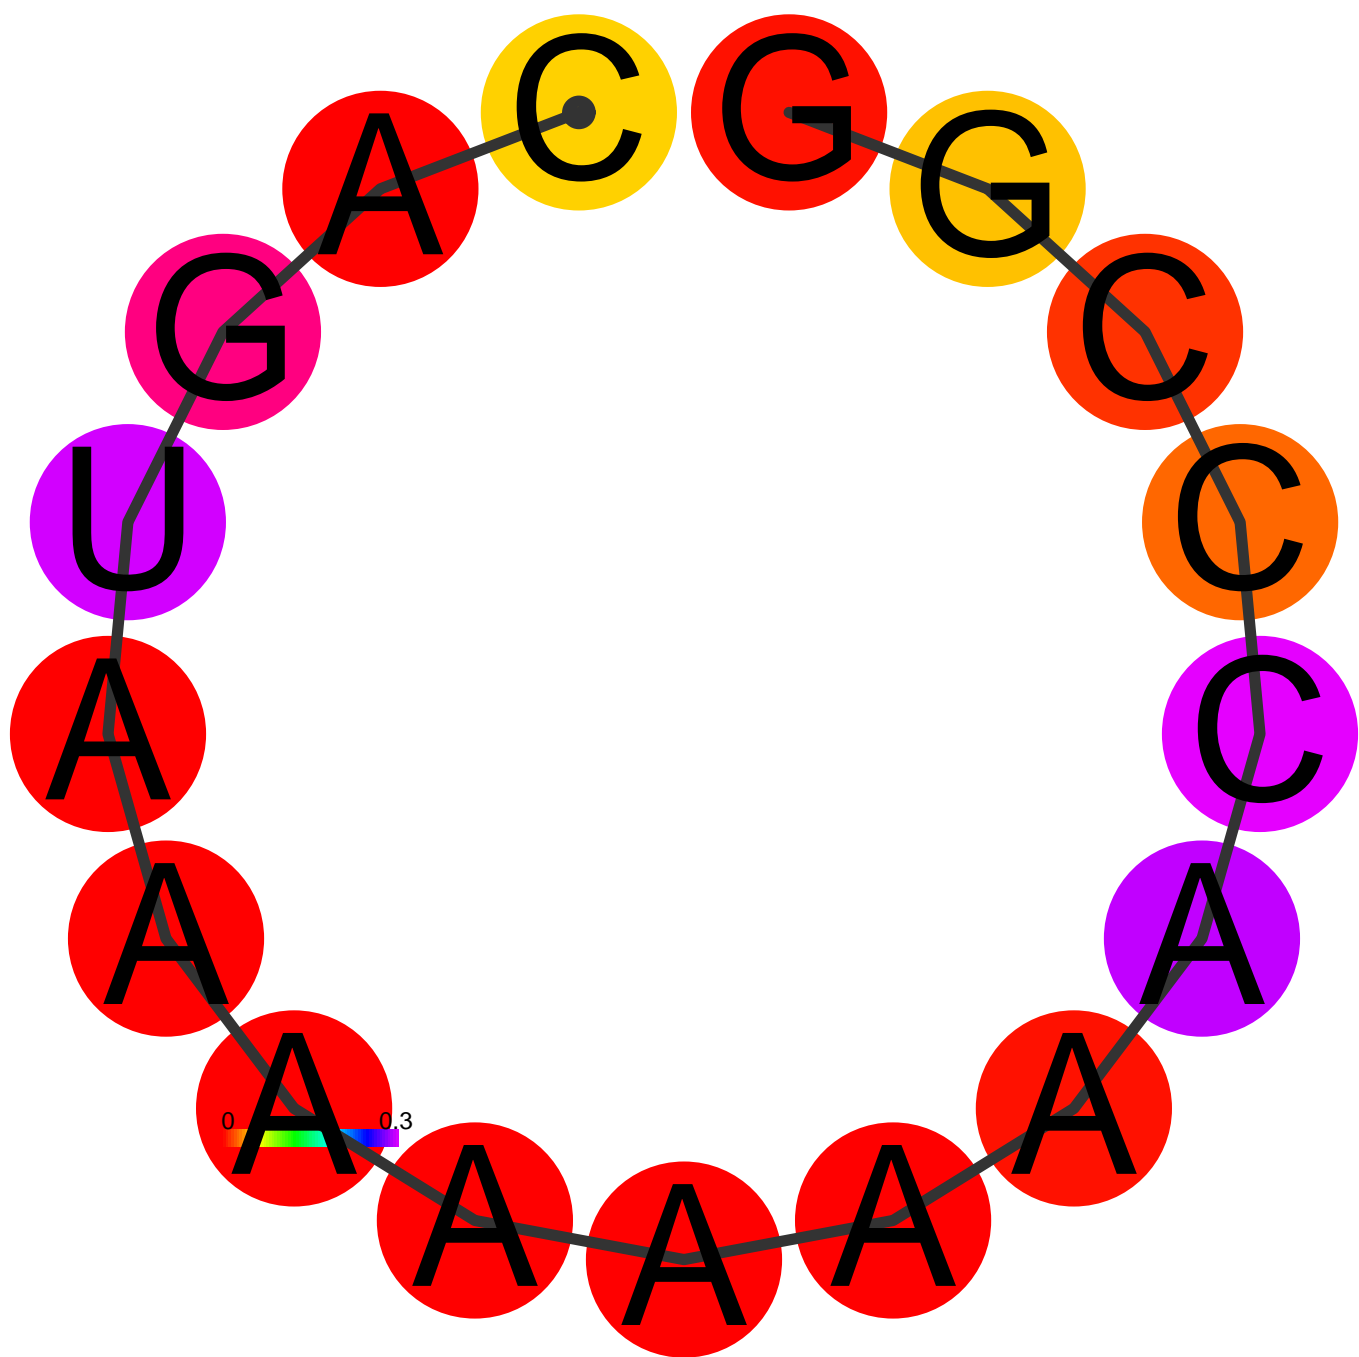

Supplement: Supplementary file 285 [file supplementary]

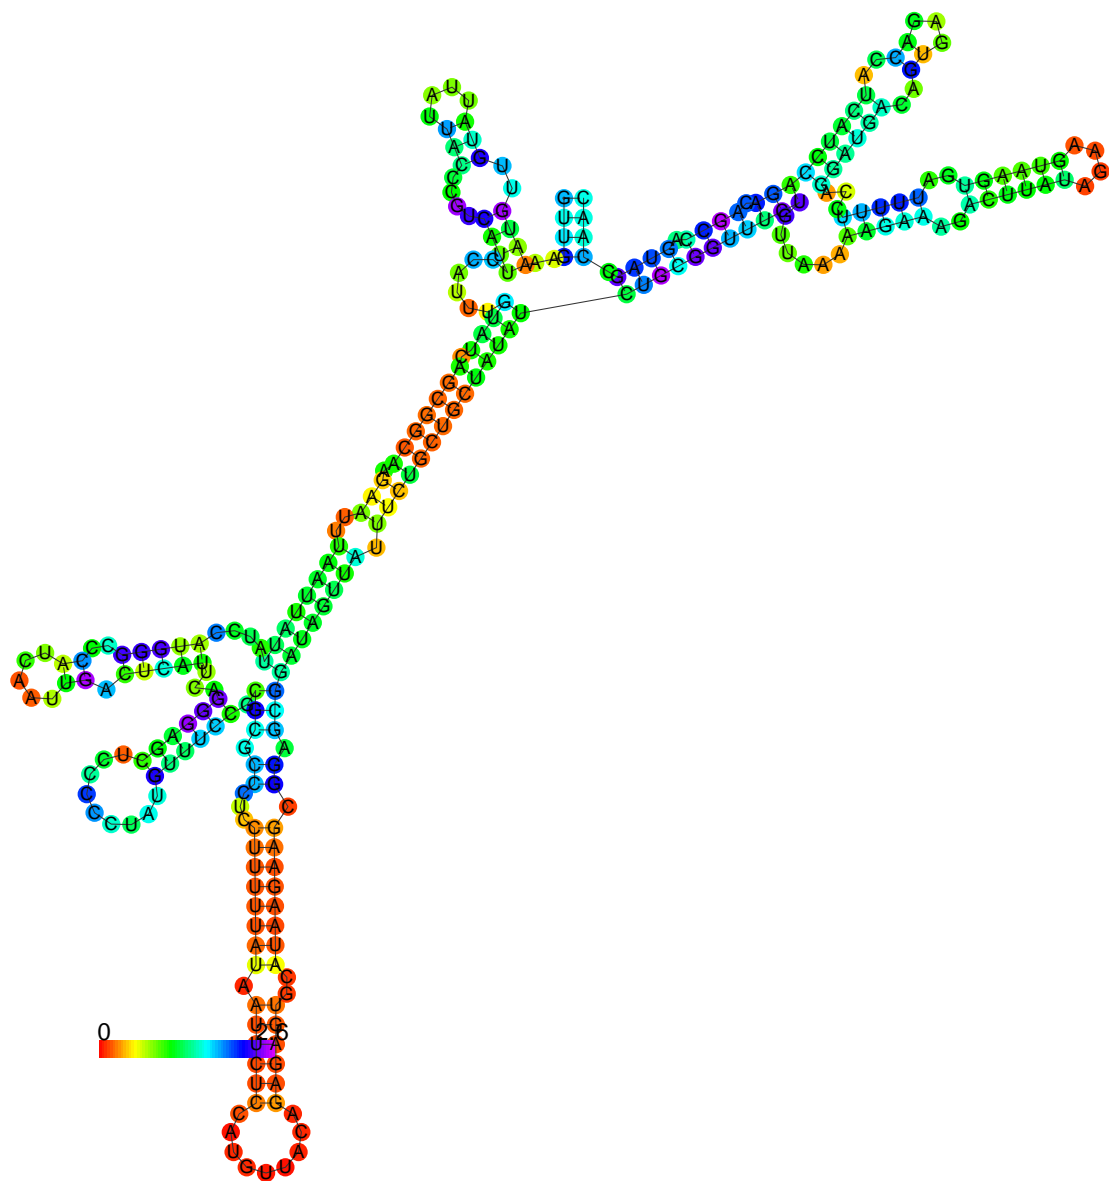

Supplement: Supplementary file 286 [file supplementary]

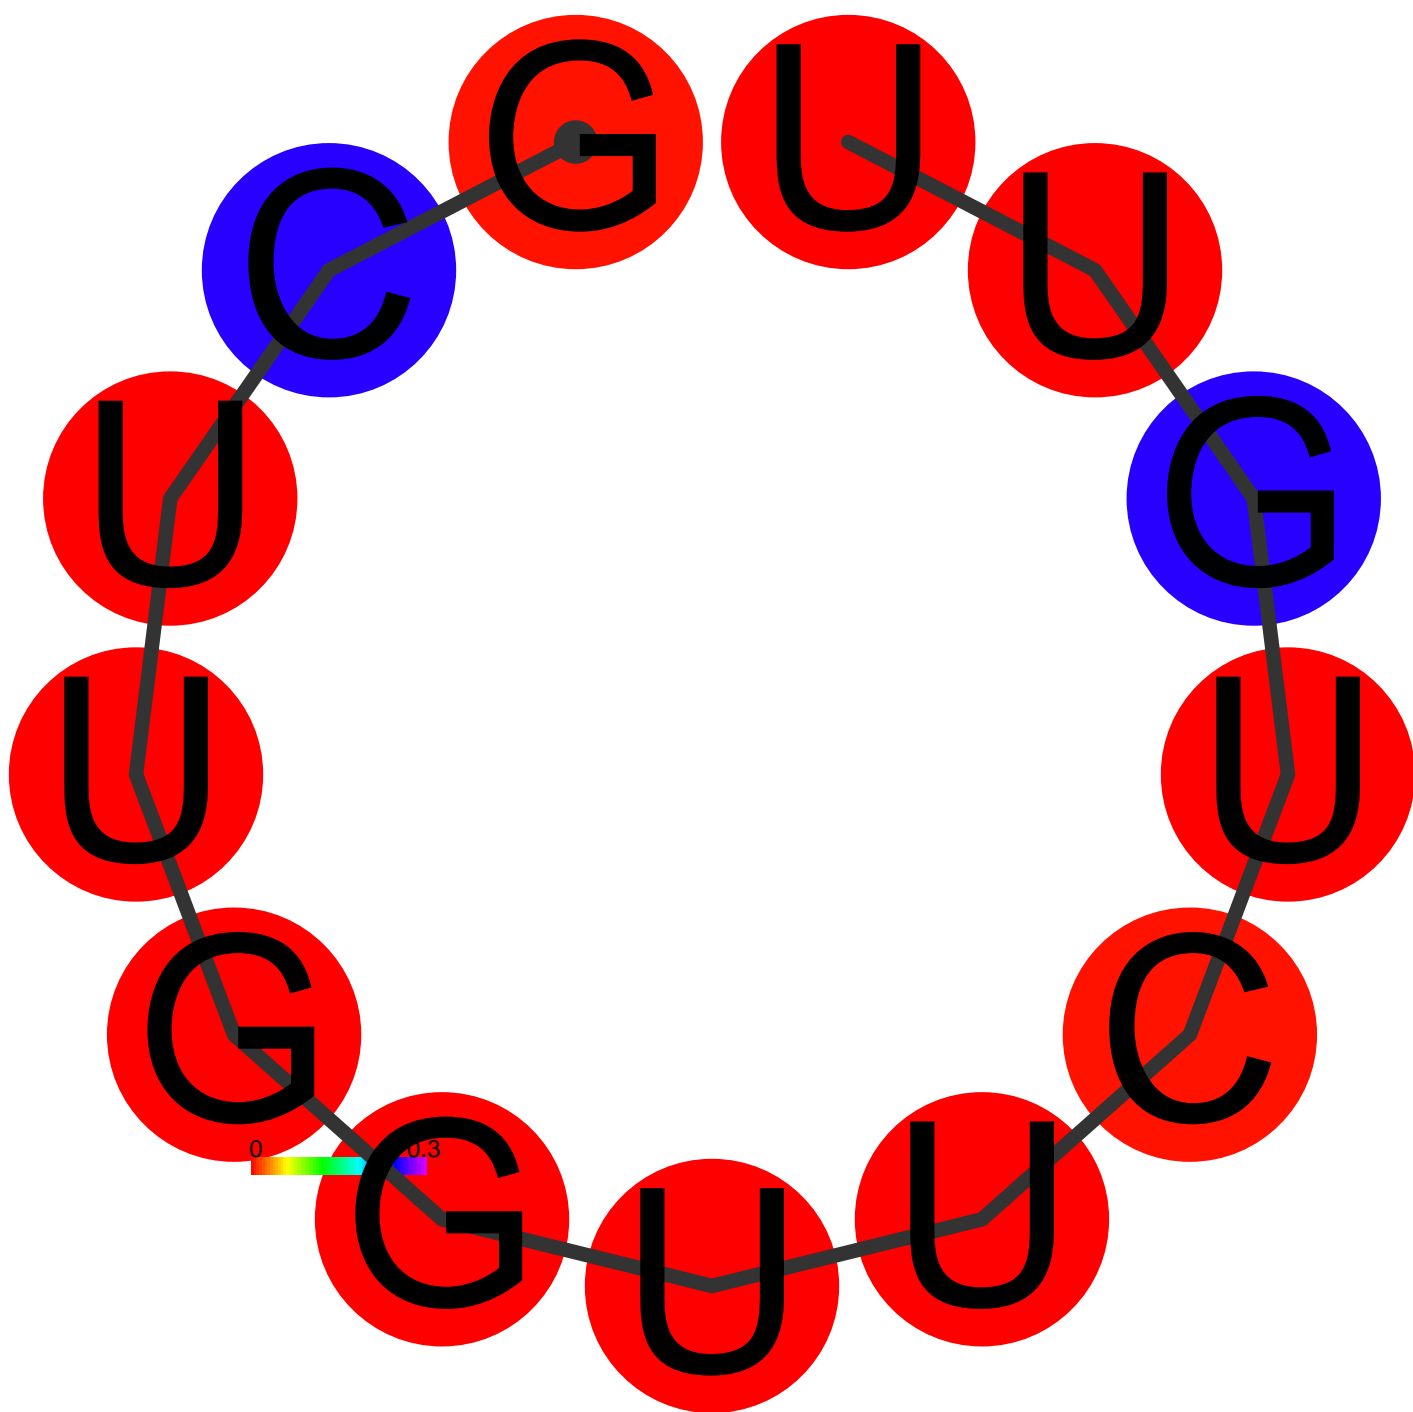

Supplement: Supplementary file 287 [file supplementary]

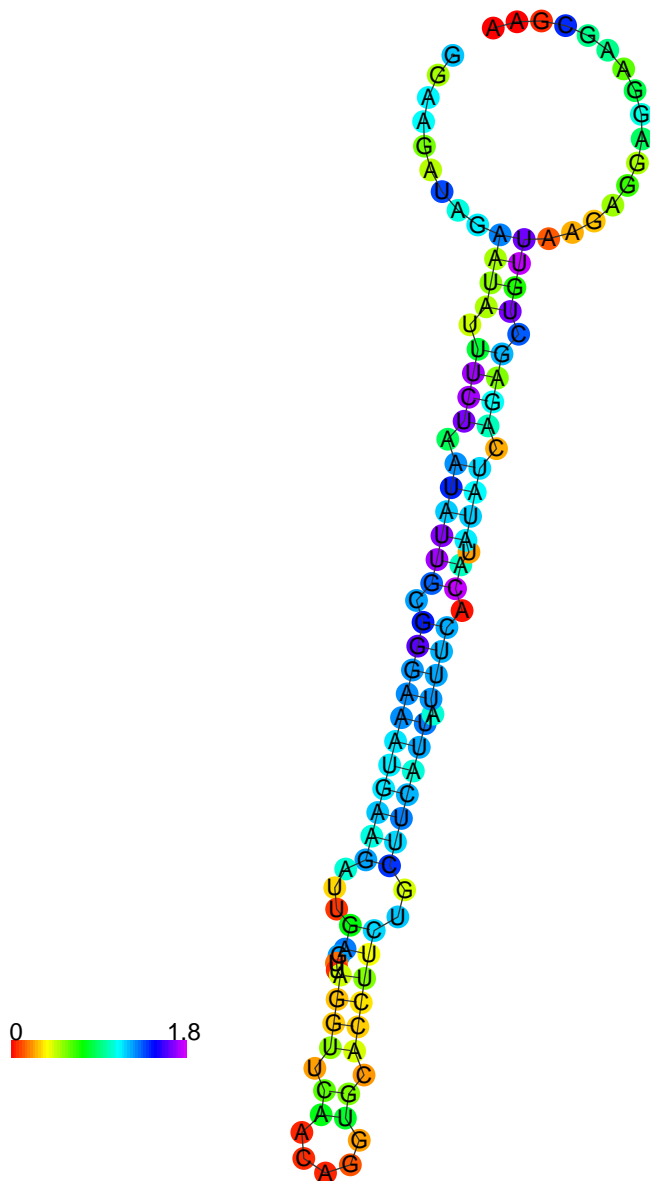

Supplement: Supplementary file 288 [file supplementary]

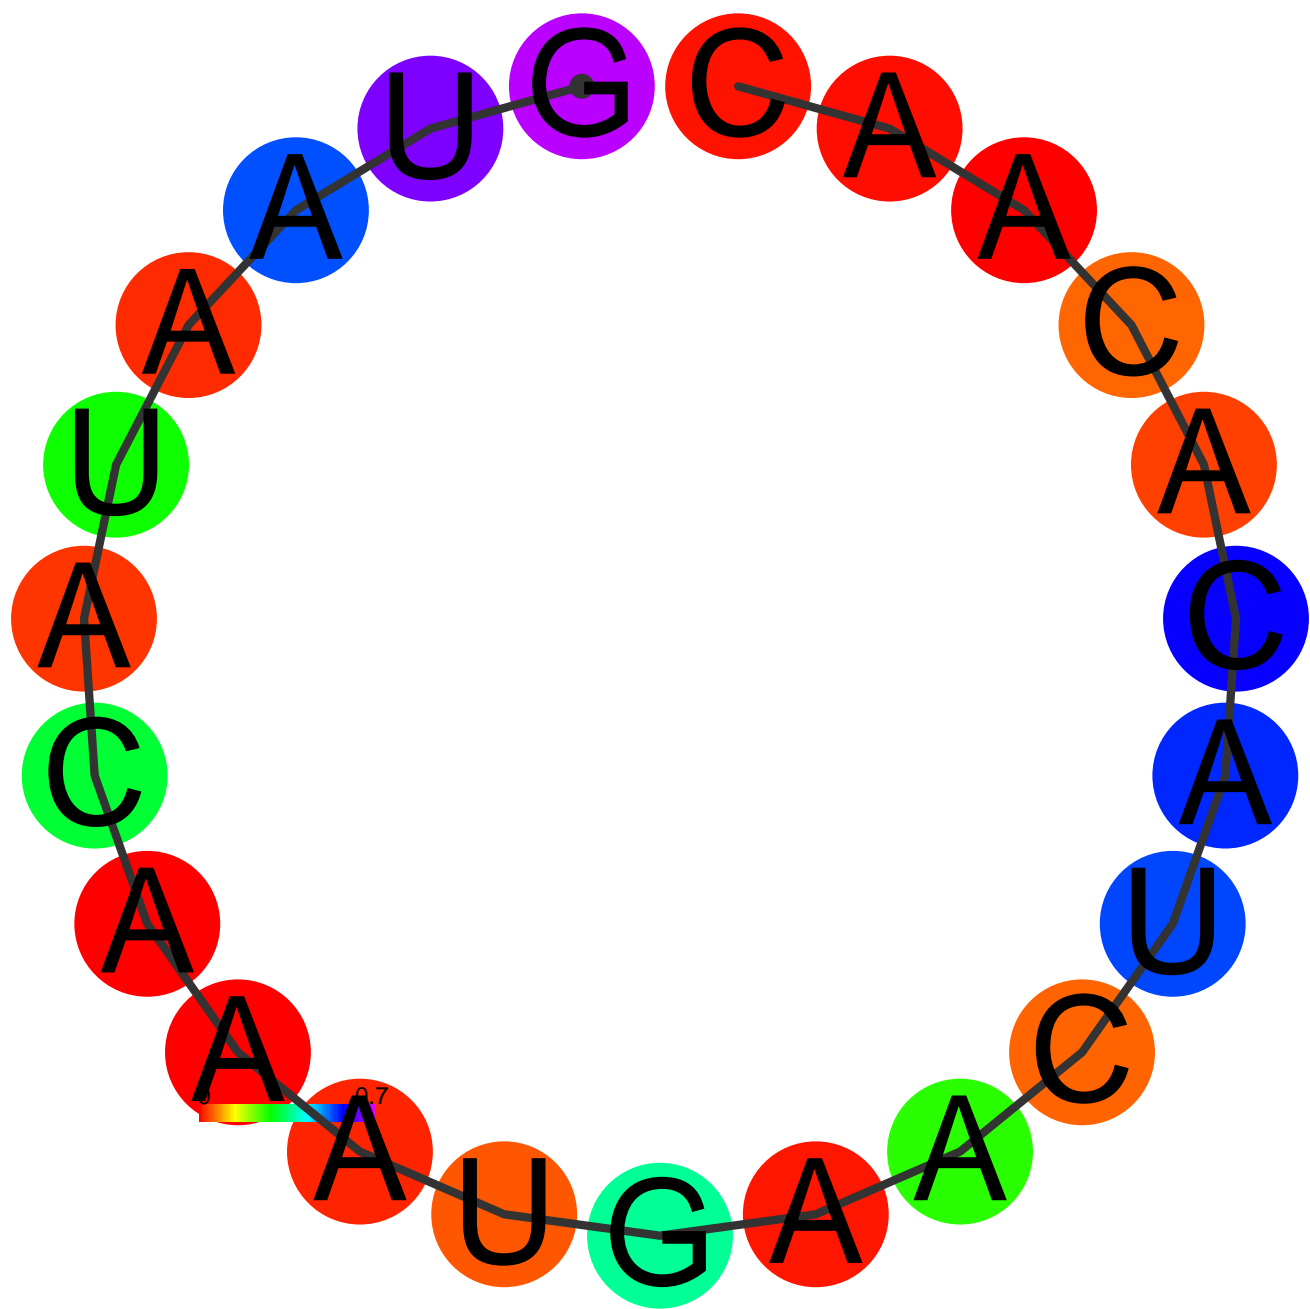

Supplement: Supplementary file 289 [file supplementary]

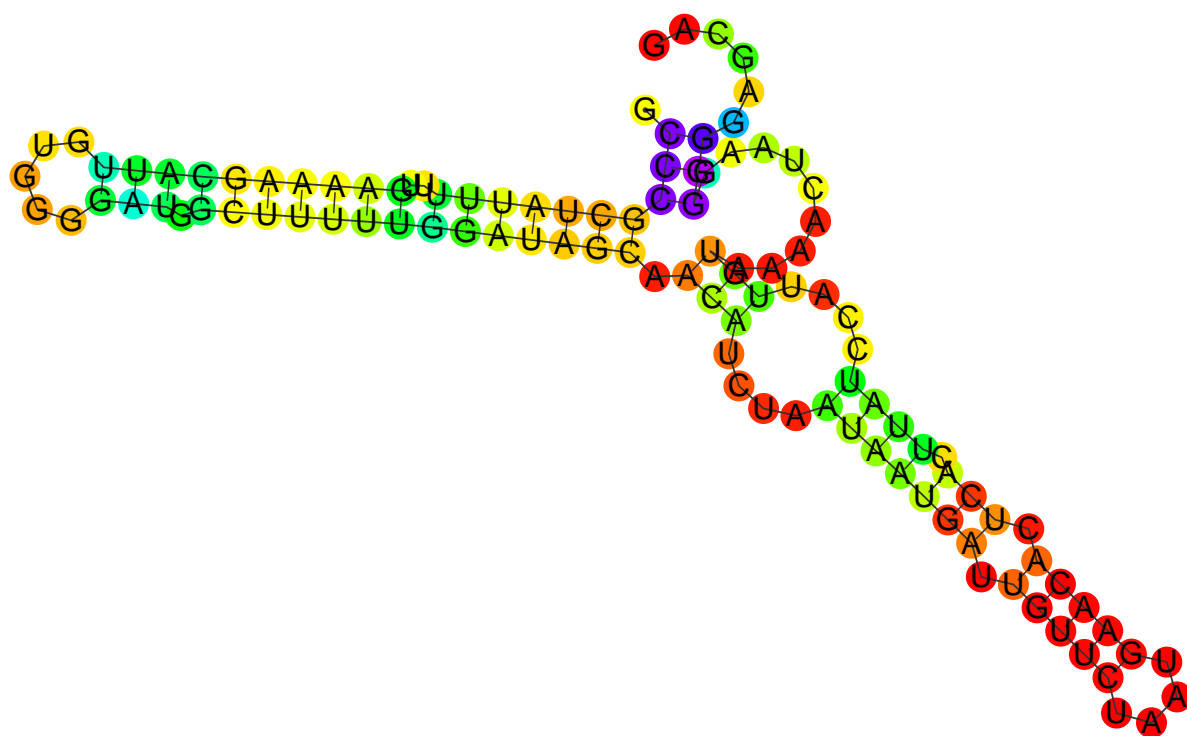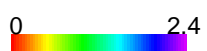

Supplement: Supplementary file 290 [file supplementary]

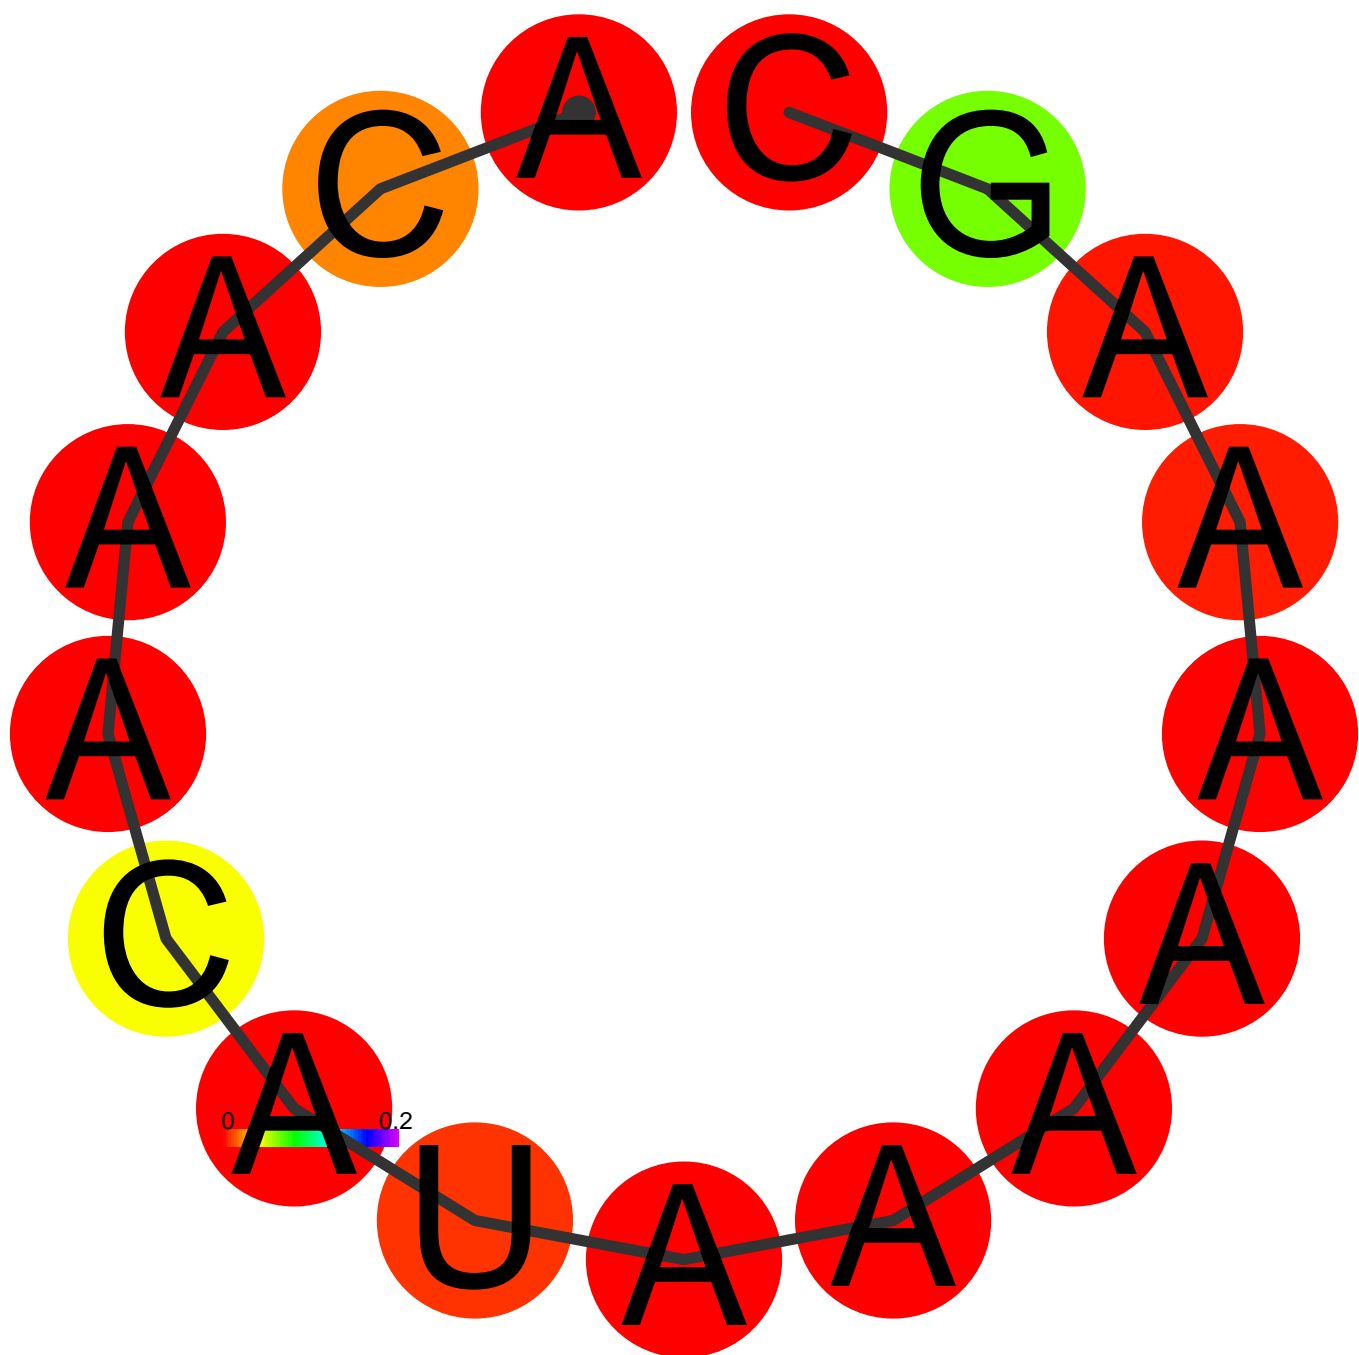

Supplement: Supplementary file 291 [file supplementary]

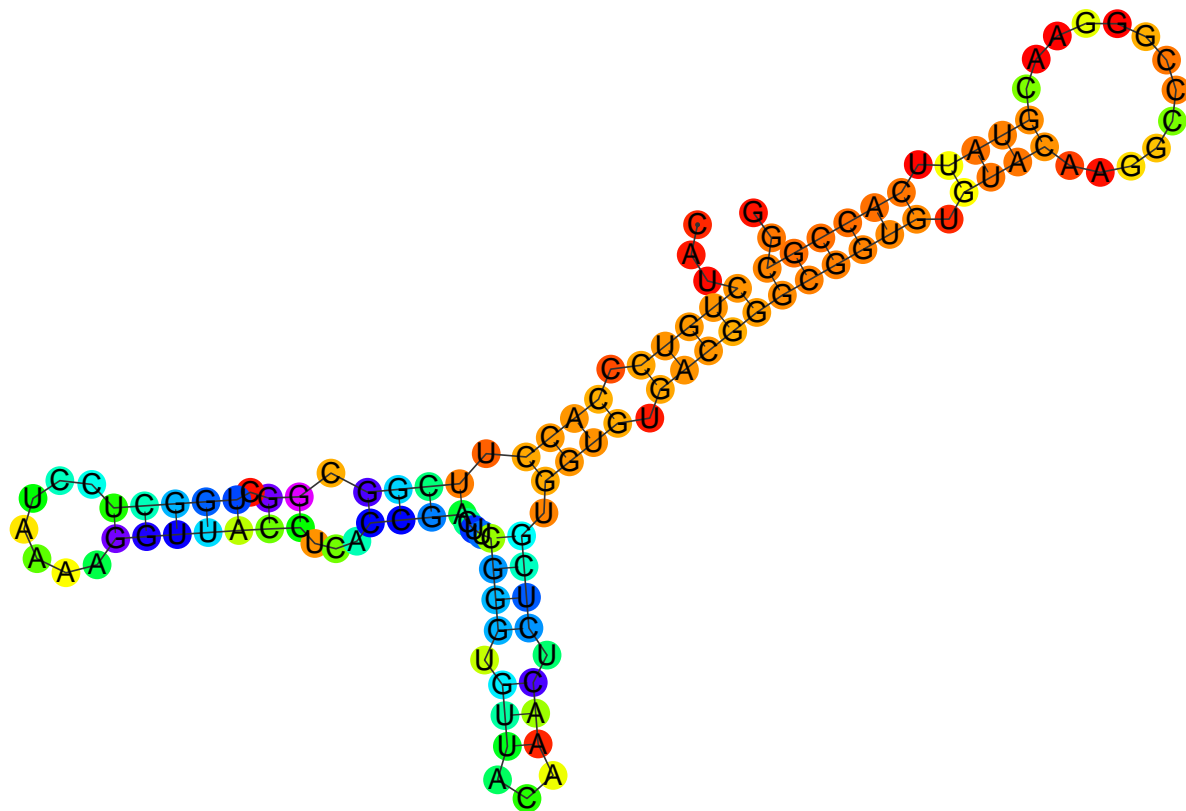

Supplement: Supplementary file 292 [file supplementary]

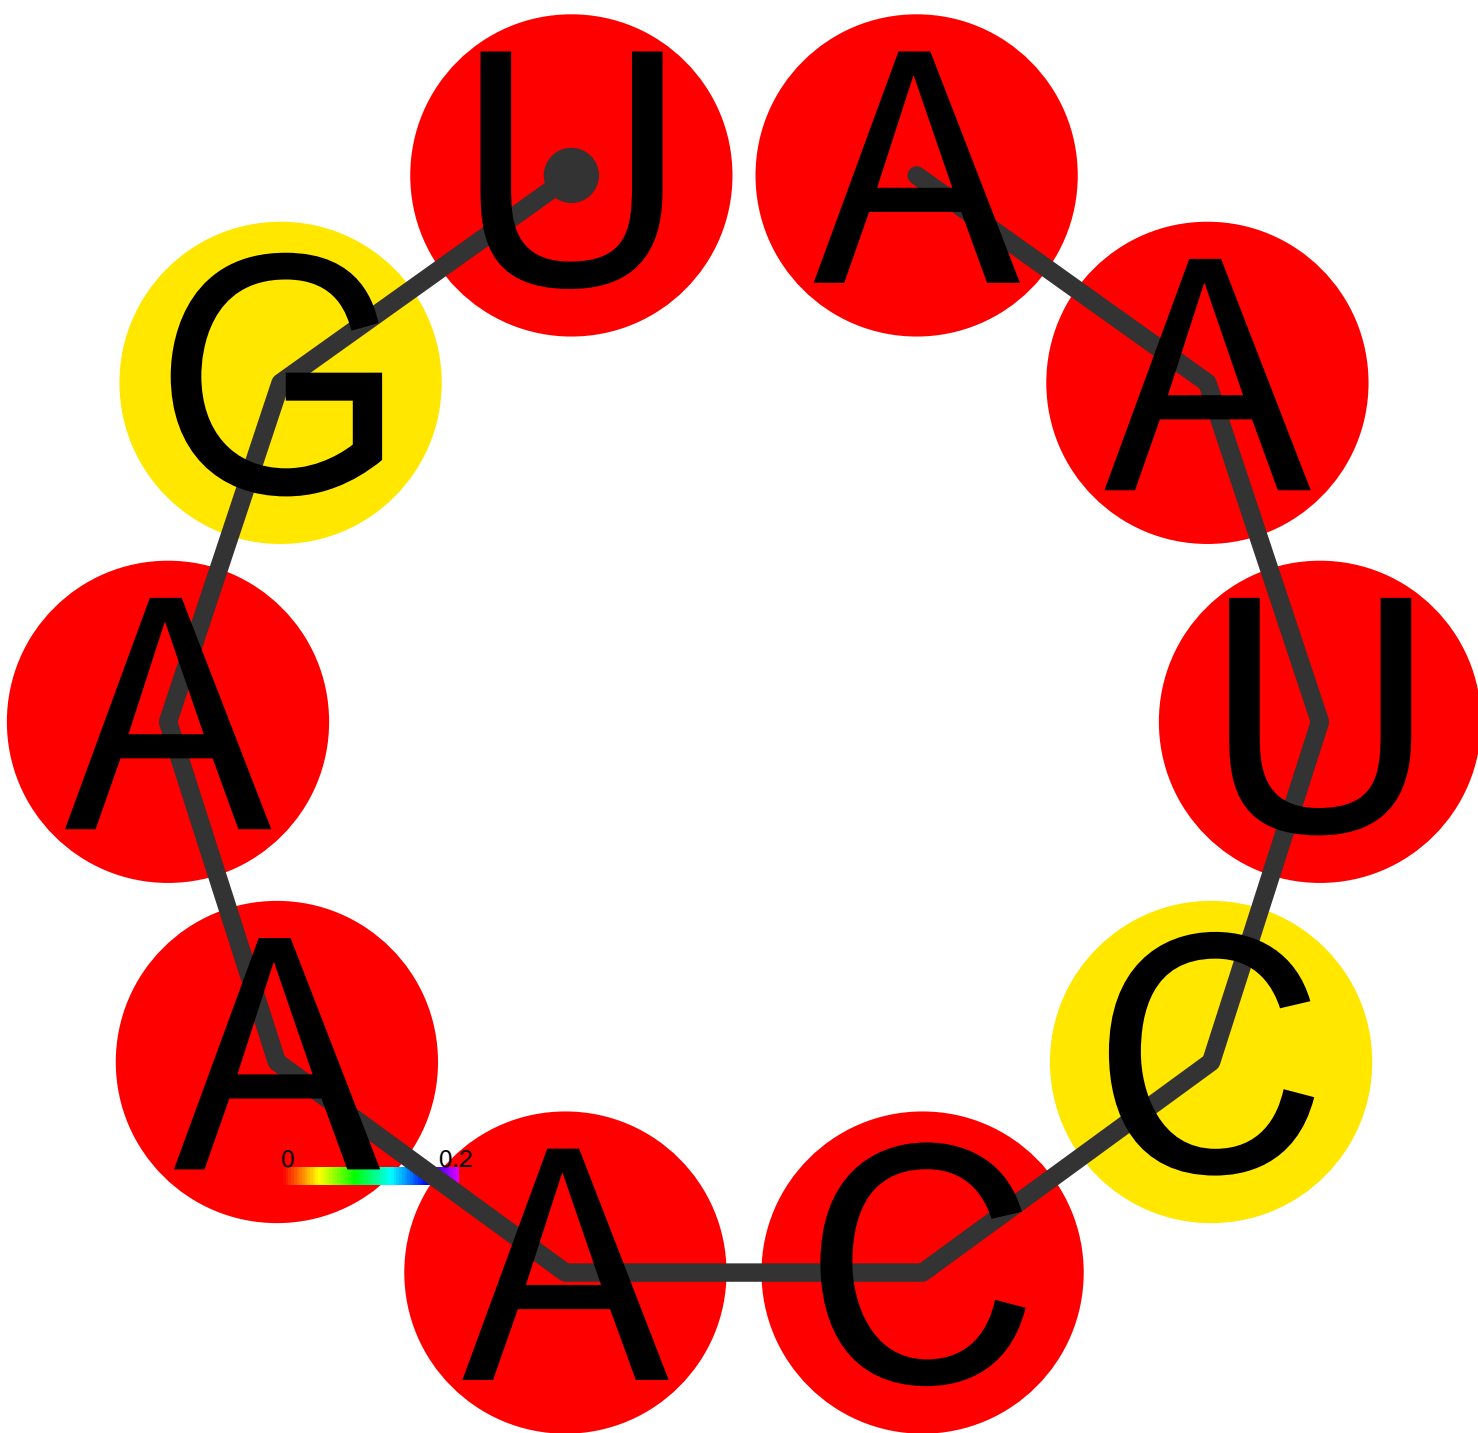

Supplement: Supplementary file 293 [file supplementary]



Supplement: Supplementary file 294 [file supplementary]

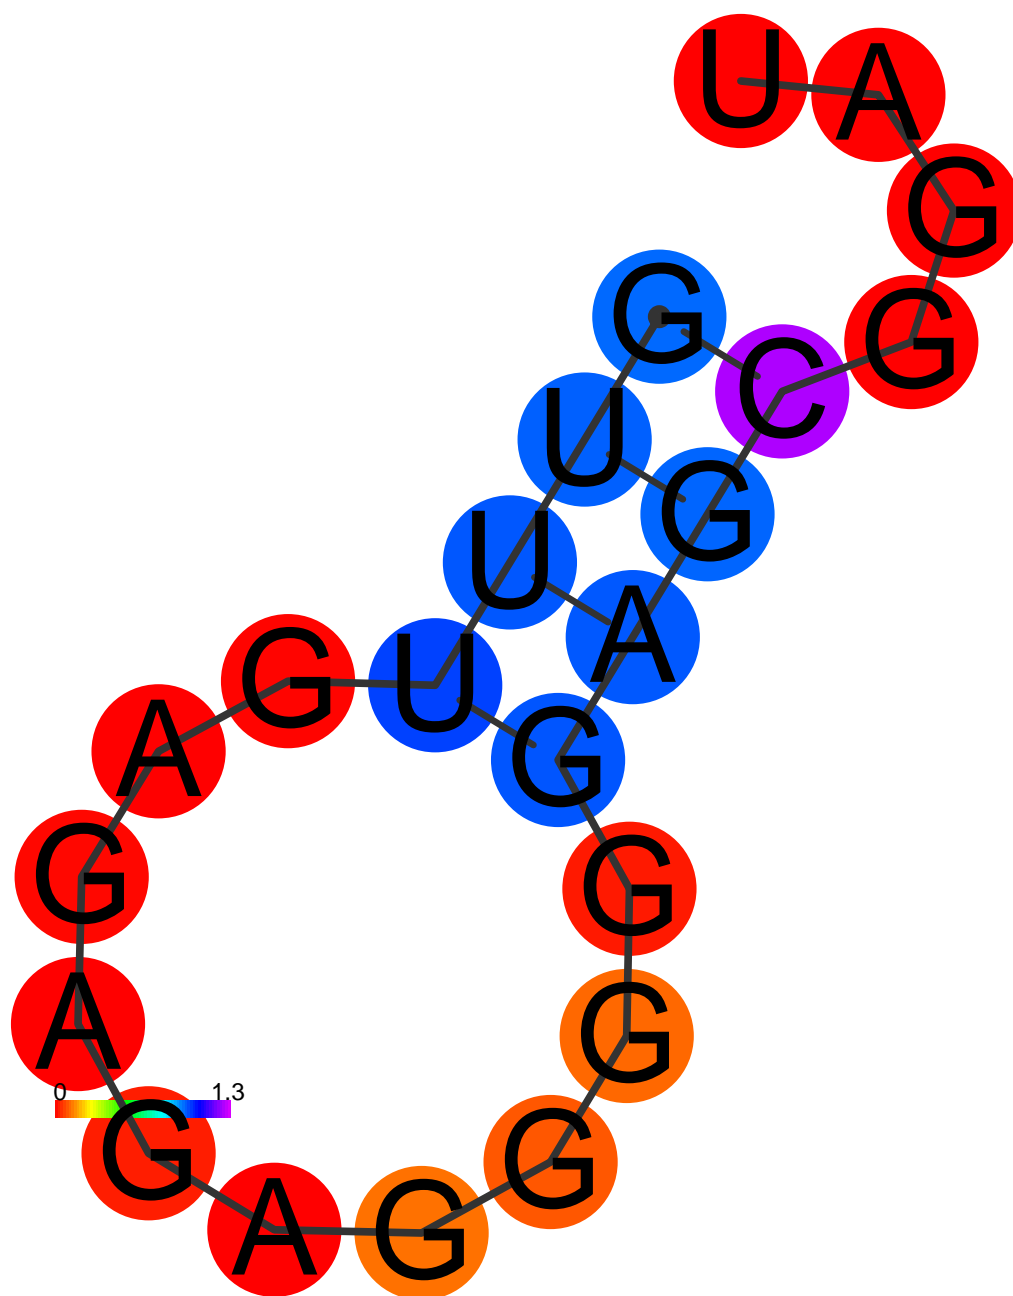

Supplement: Supplementary file 295 [file supplementary]

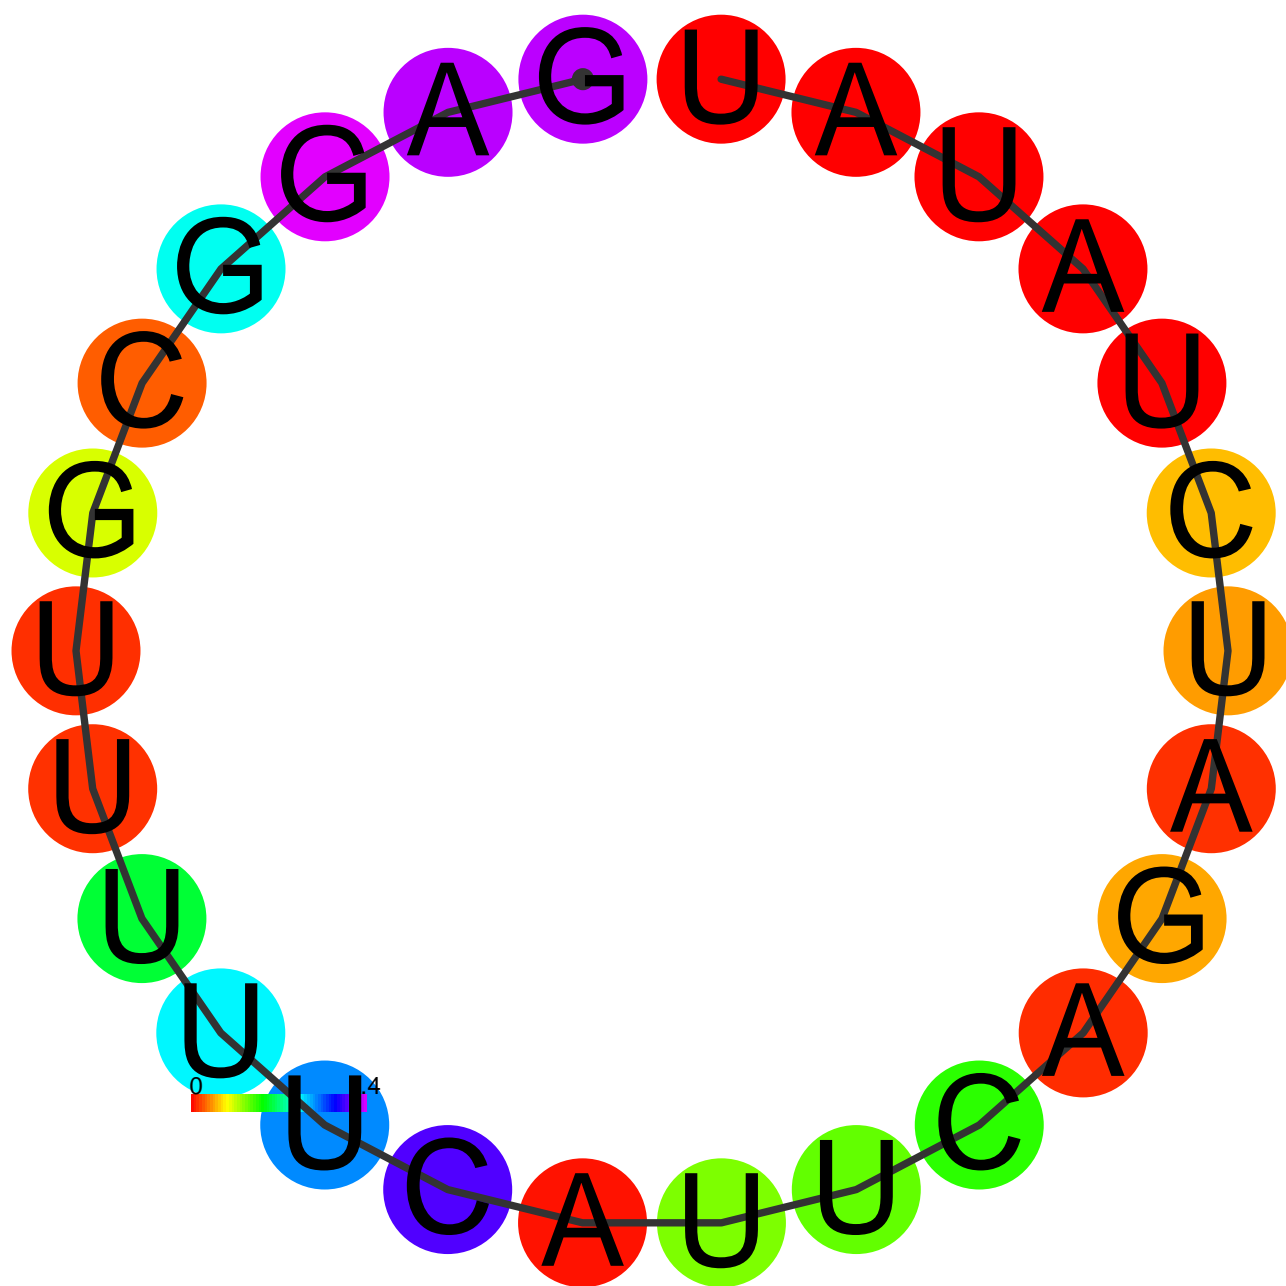

Supplement: Supplementary file 296 [file supplementary]

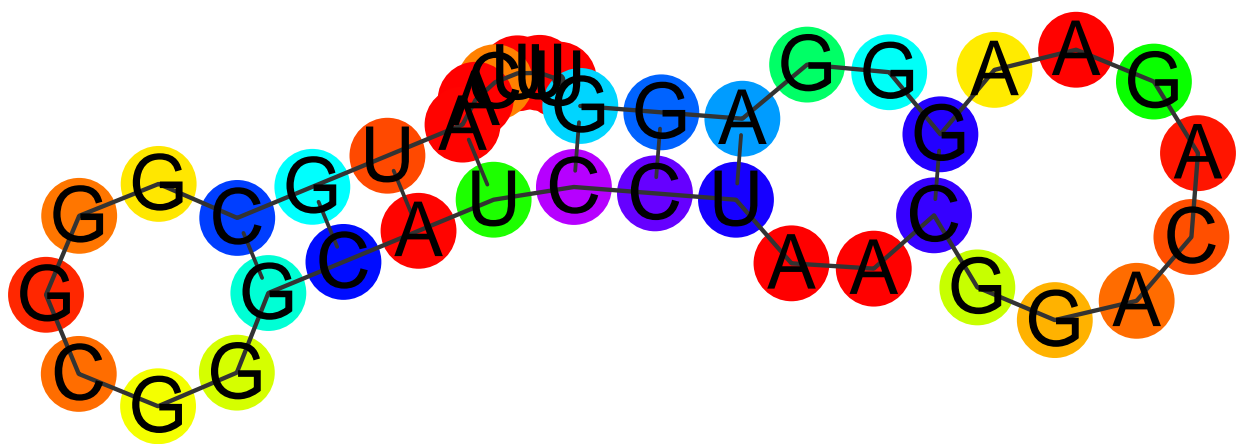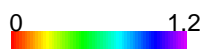

Supplement: Supplementary file 297 [file supplementary]

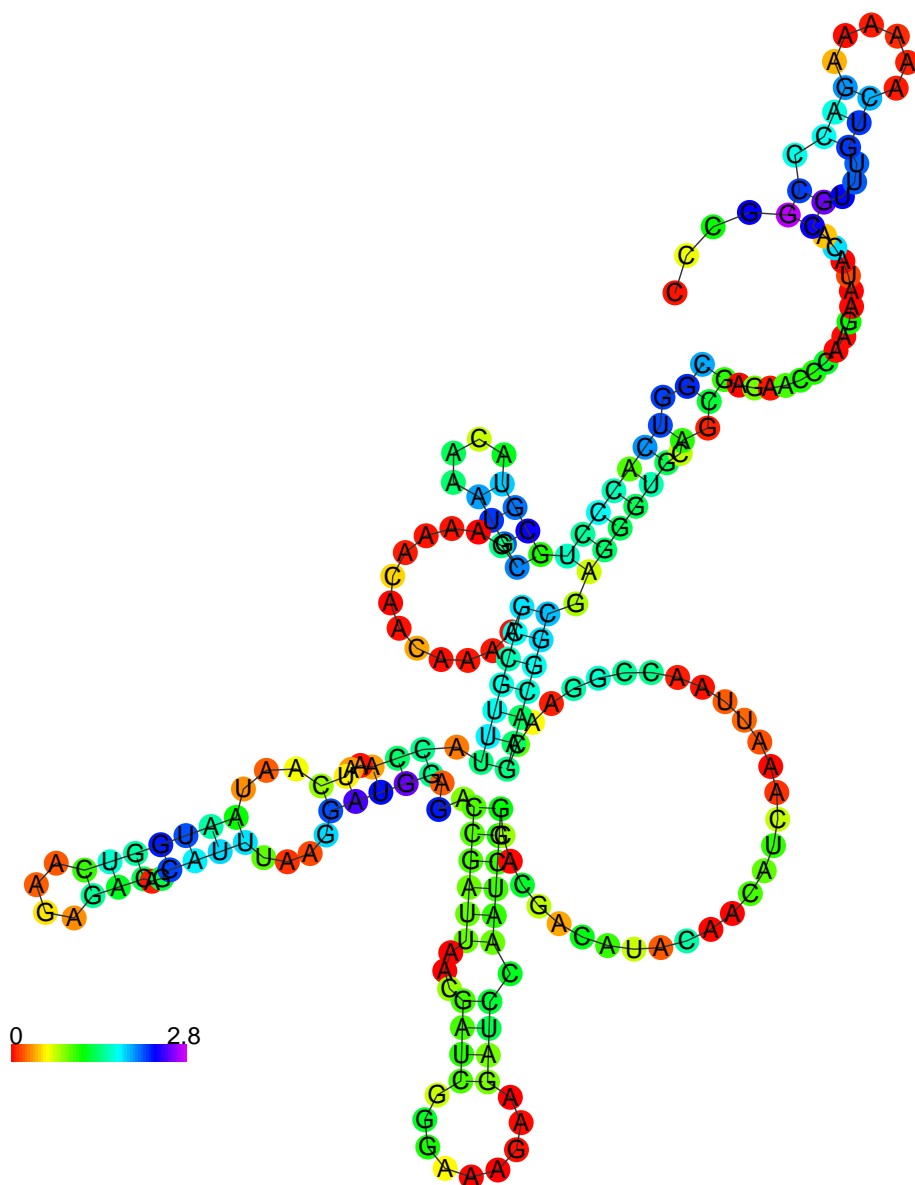

Supplement: Supplementary file 298 [file supplementary]

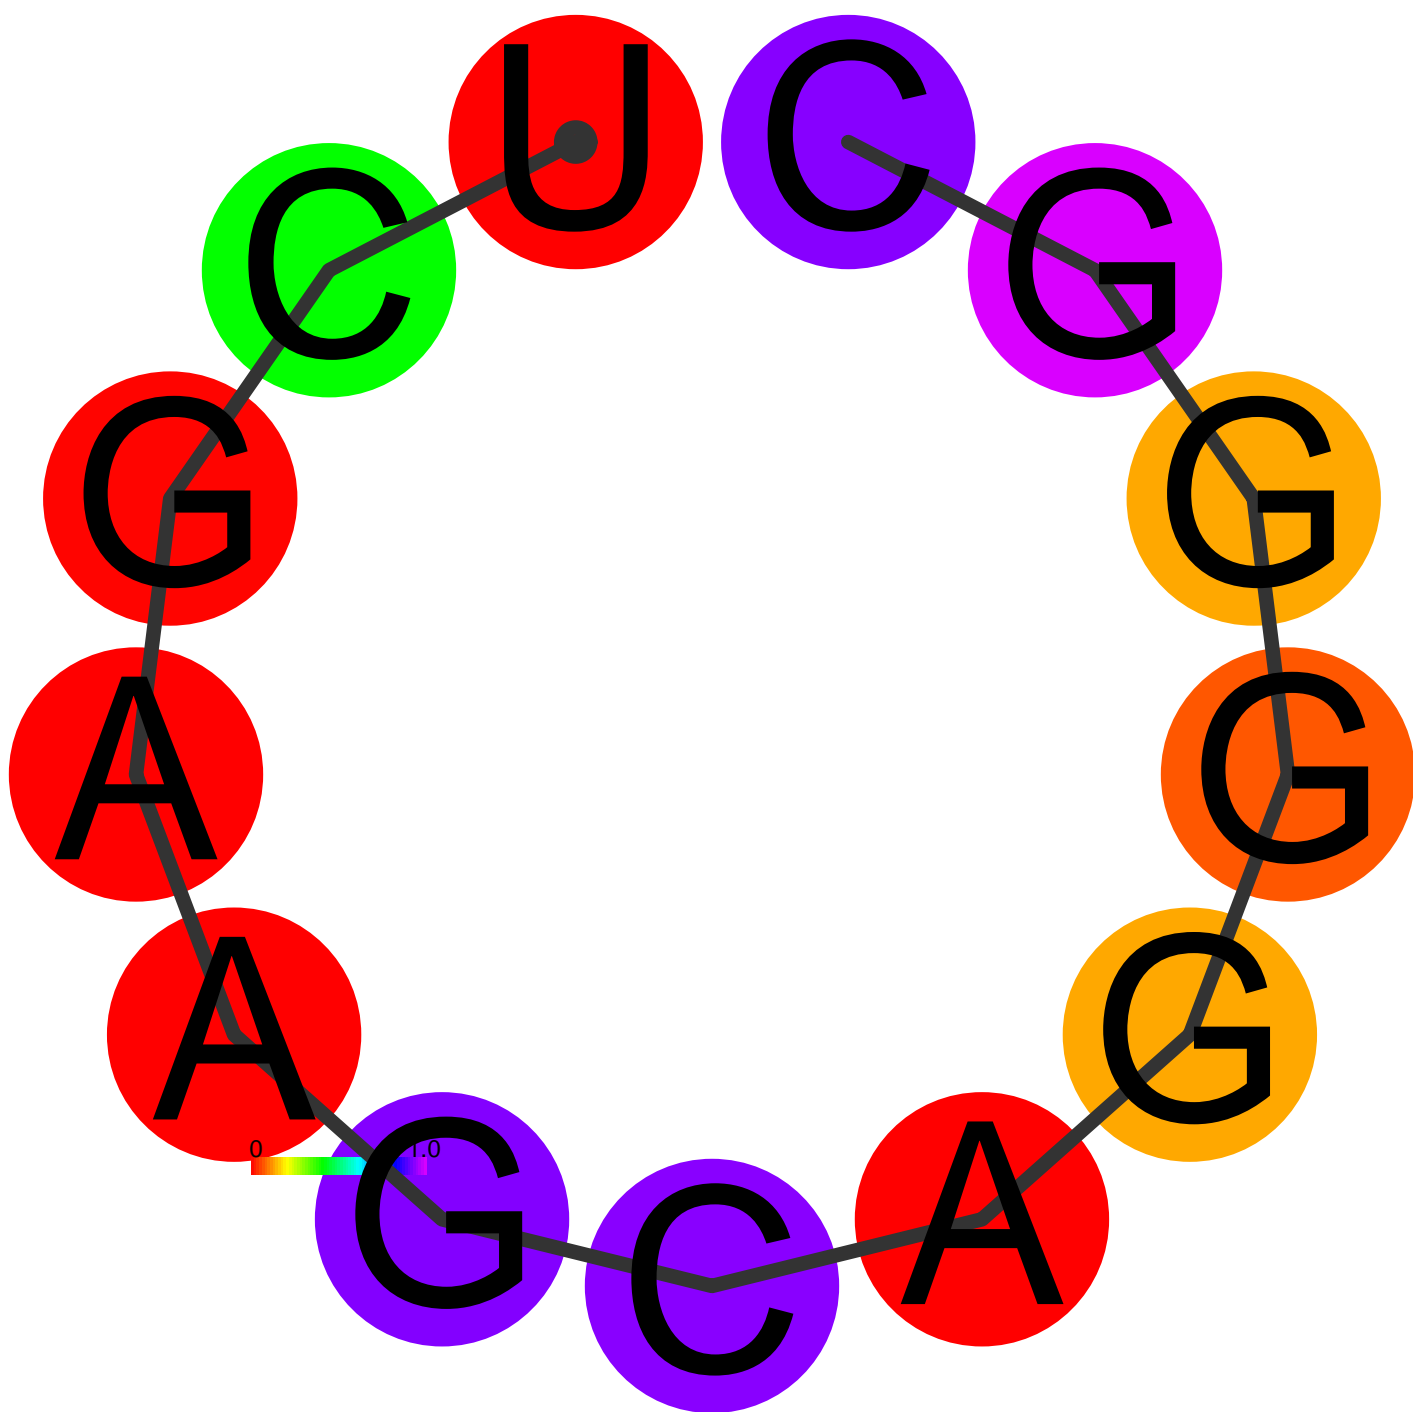

Supplement: Supplementary file 299 [file supplementary]

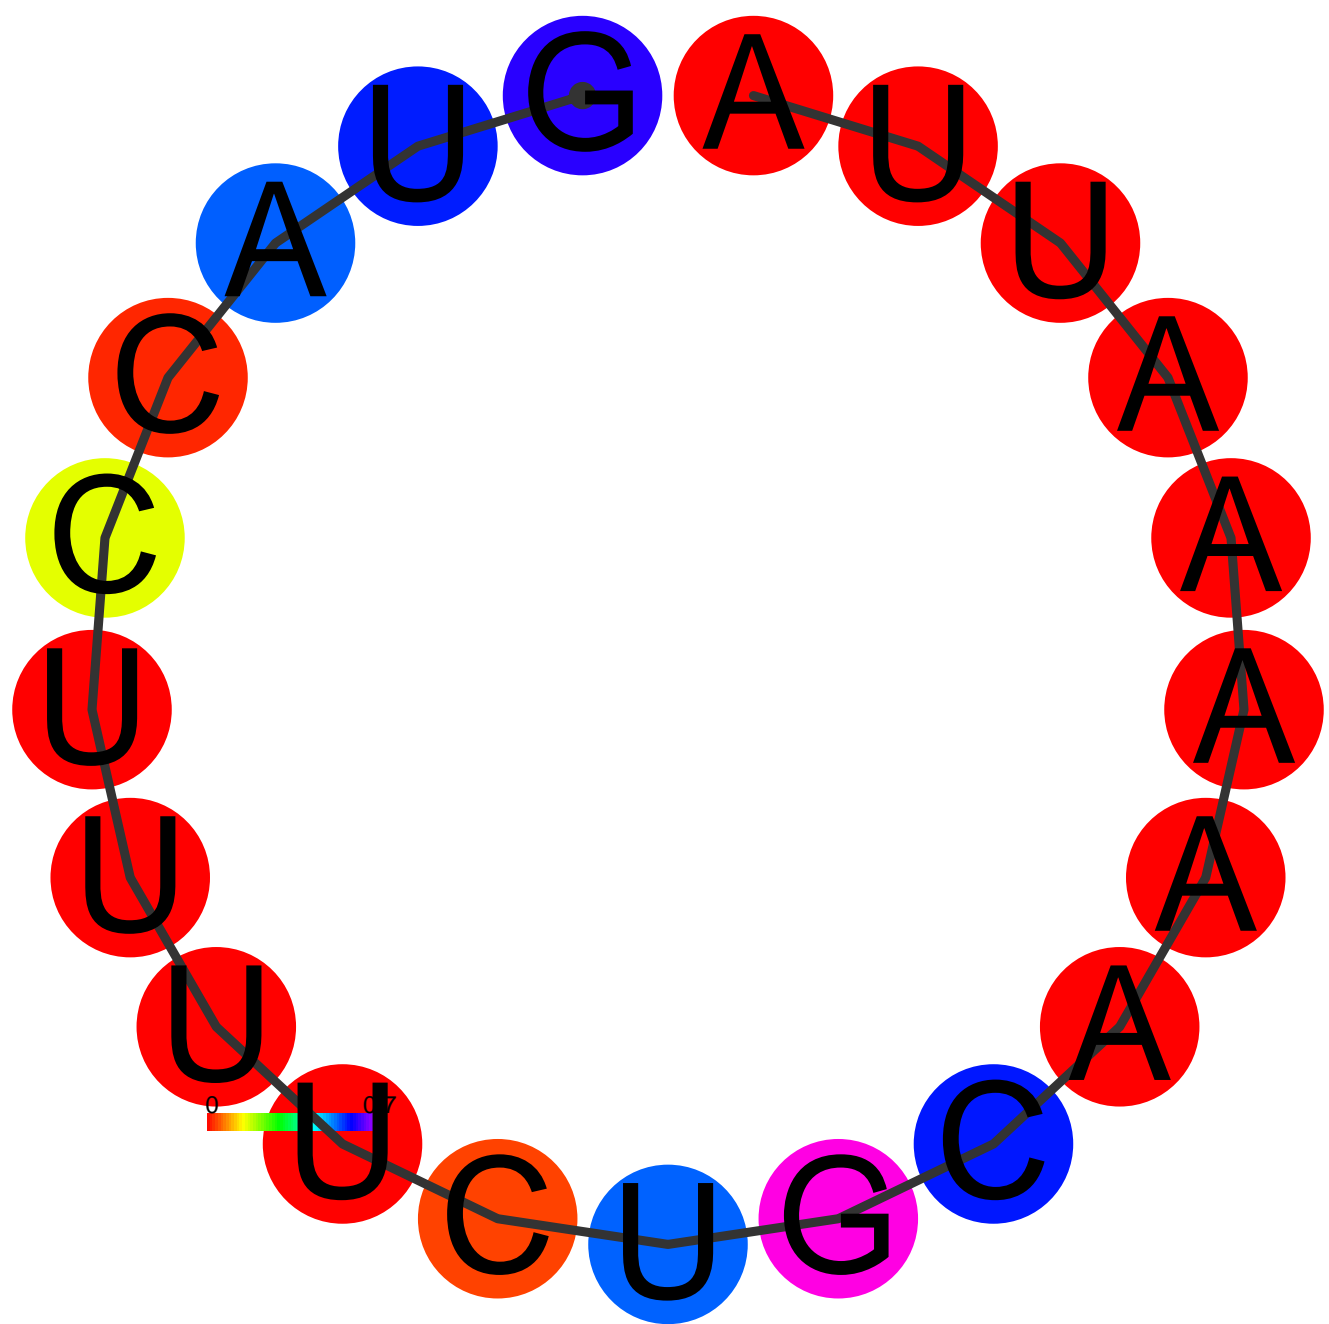

Supplement: Supplementary file 300 [file supplementary]
