# Supplementary figures and images for: Understanding the Effect of Different Glucose Concentrations in the Oligotrophic Bacterium Bacillus subtilis BS-G1 through Transcriptomics Analysis (part 4 of 6)
Source: Preprints.org preprint supplement (doi:10.20944/preprints202308.1891.v1), 2023-08-29

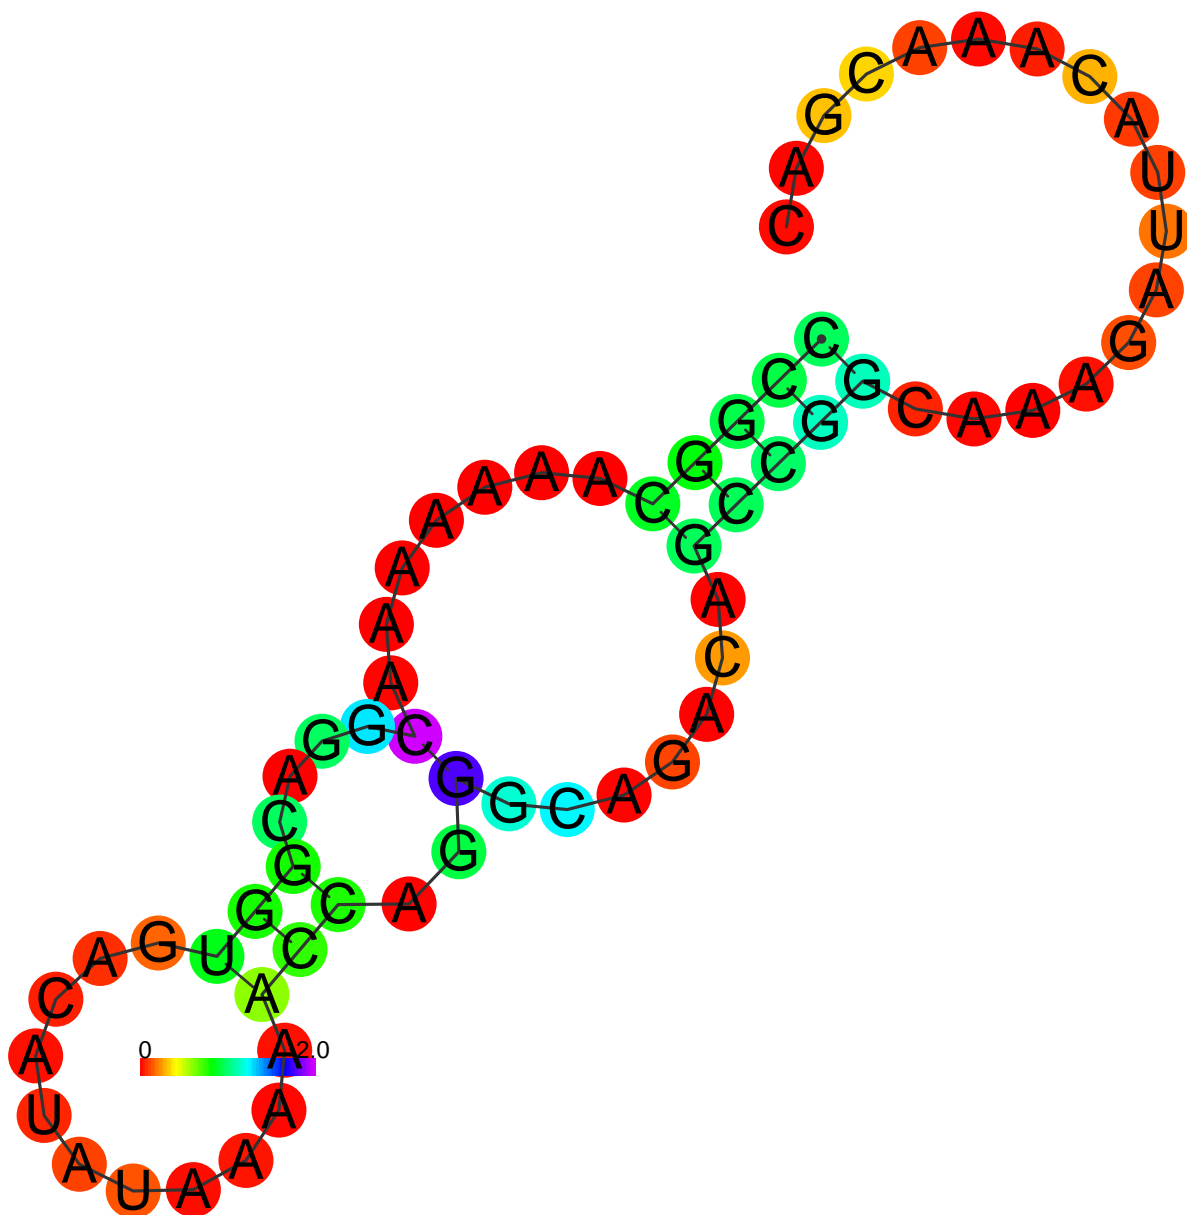

Supplement: Supplementary file 301 [file supplementary]

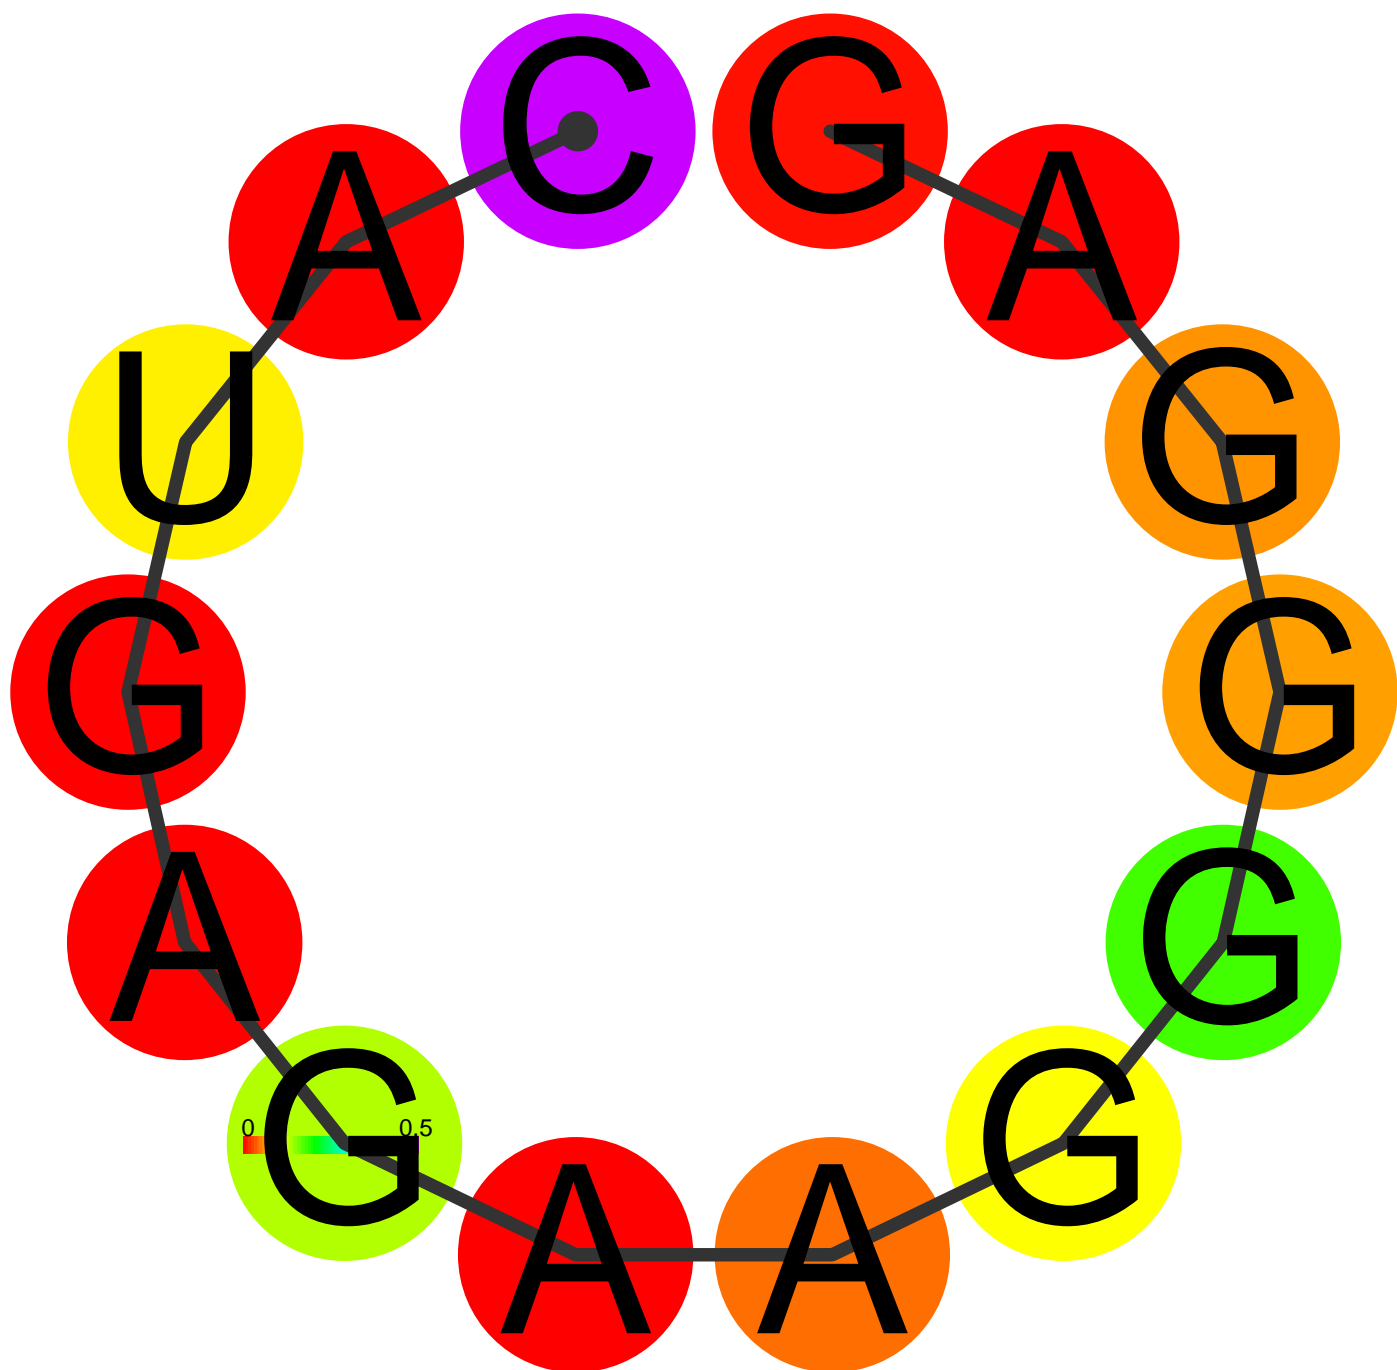

Supplement: Supplementary file 302 [file supplementary]

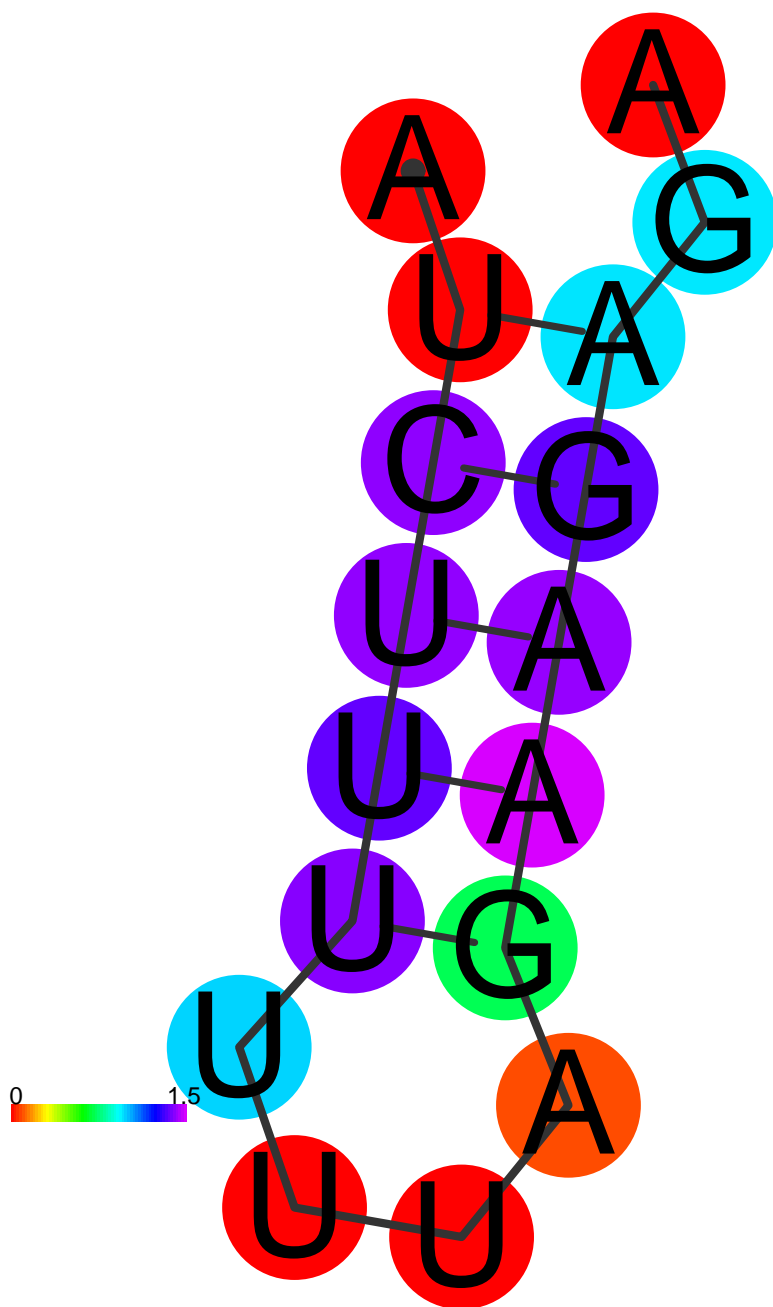

Supplement: Supplementary file 303 [file supplementary]

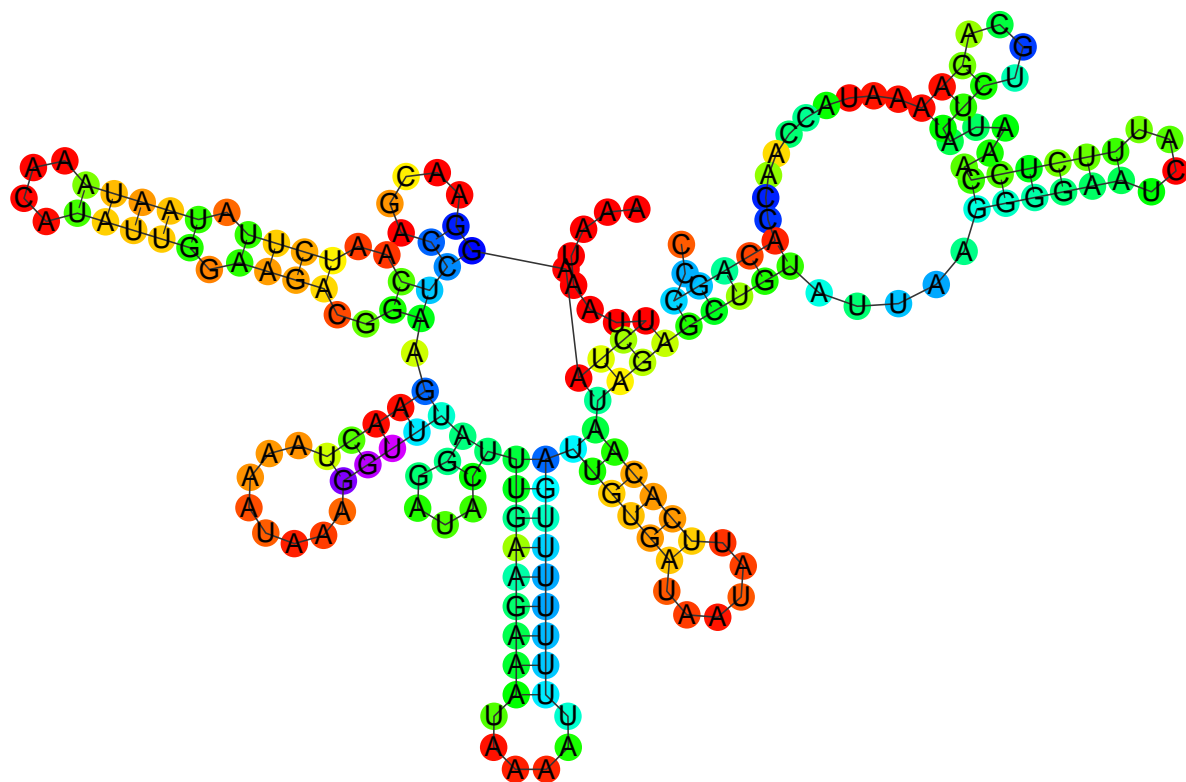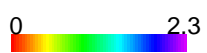

Supplement: Supplementary file 304 [file supplementary]

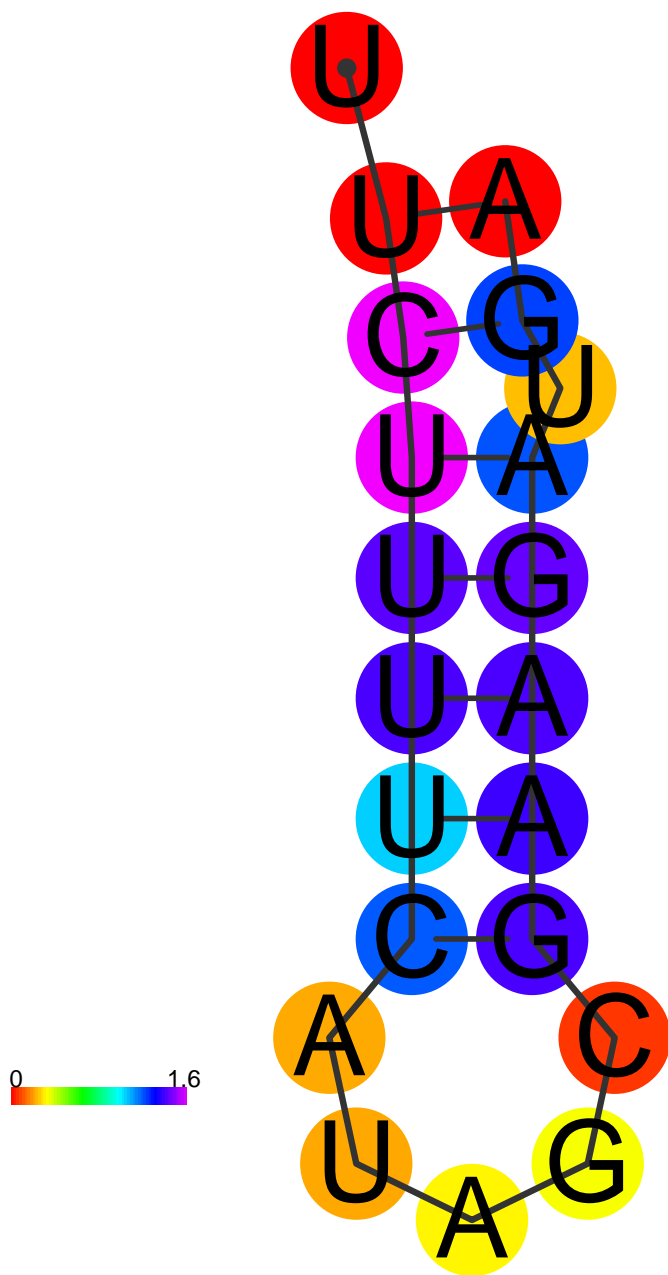

Supplement: Supplementary file 305 [file supplementary]

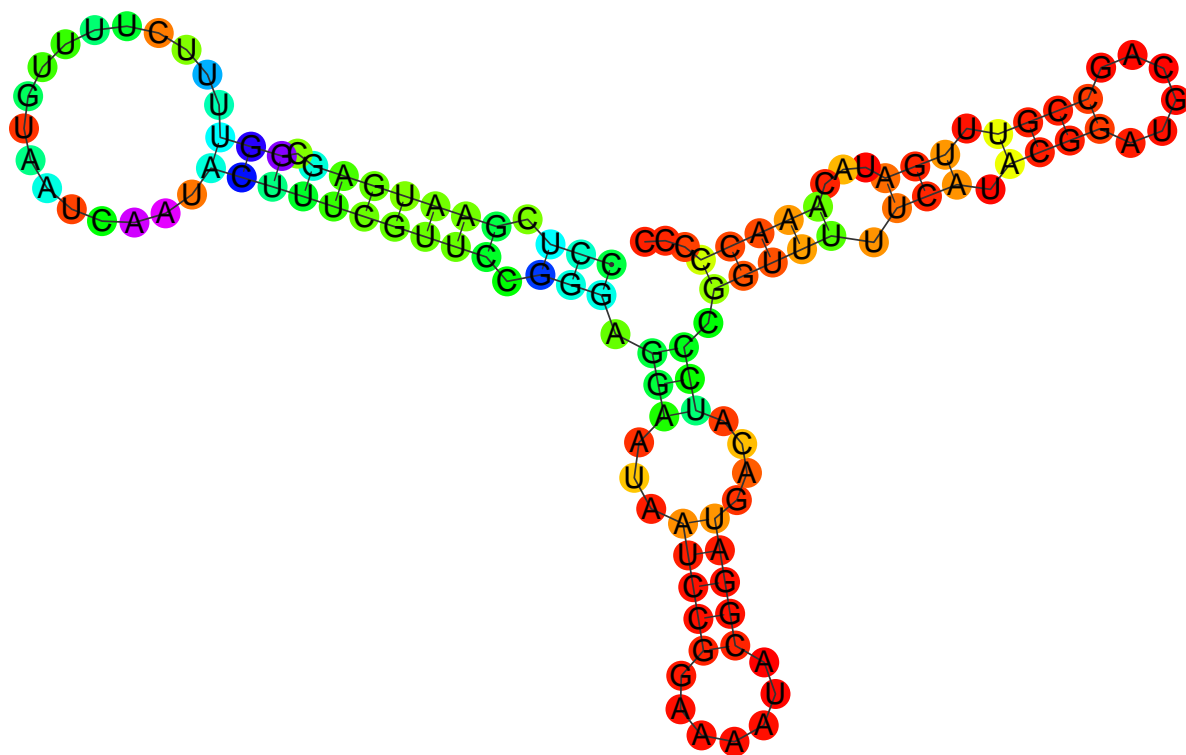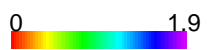

Supplement: Supplementary file 306 [file supplementary]

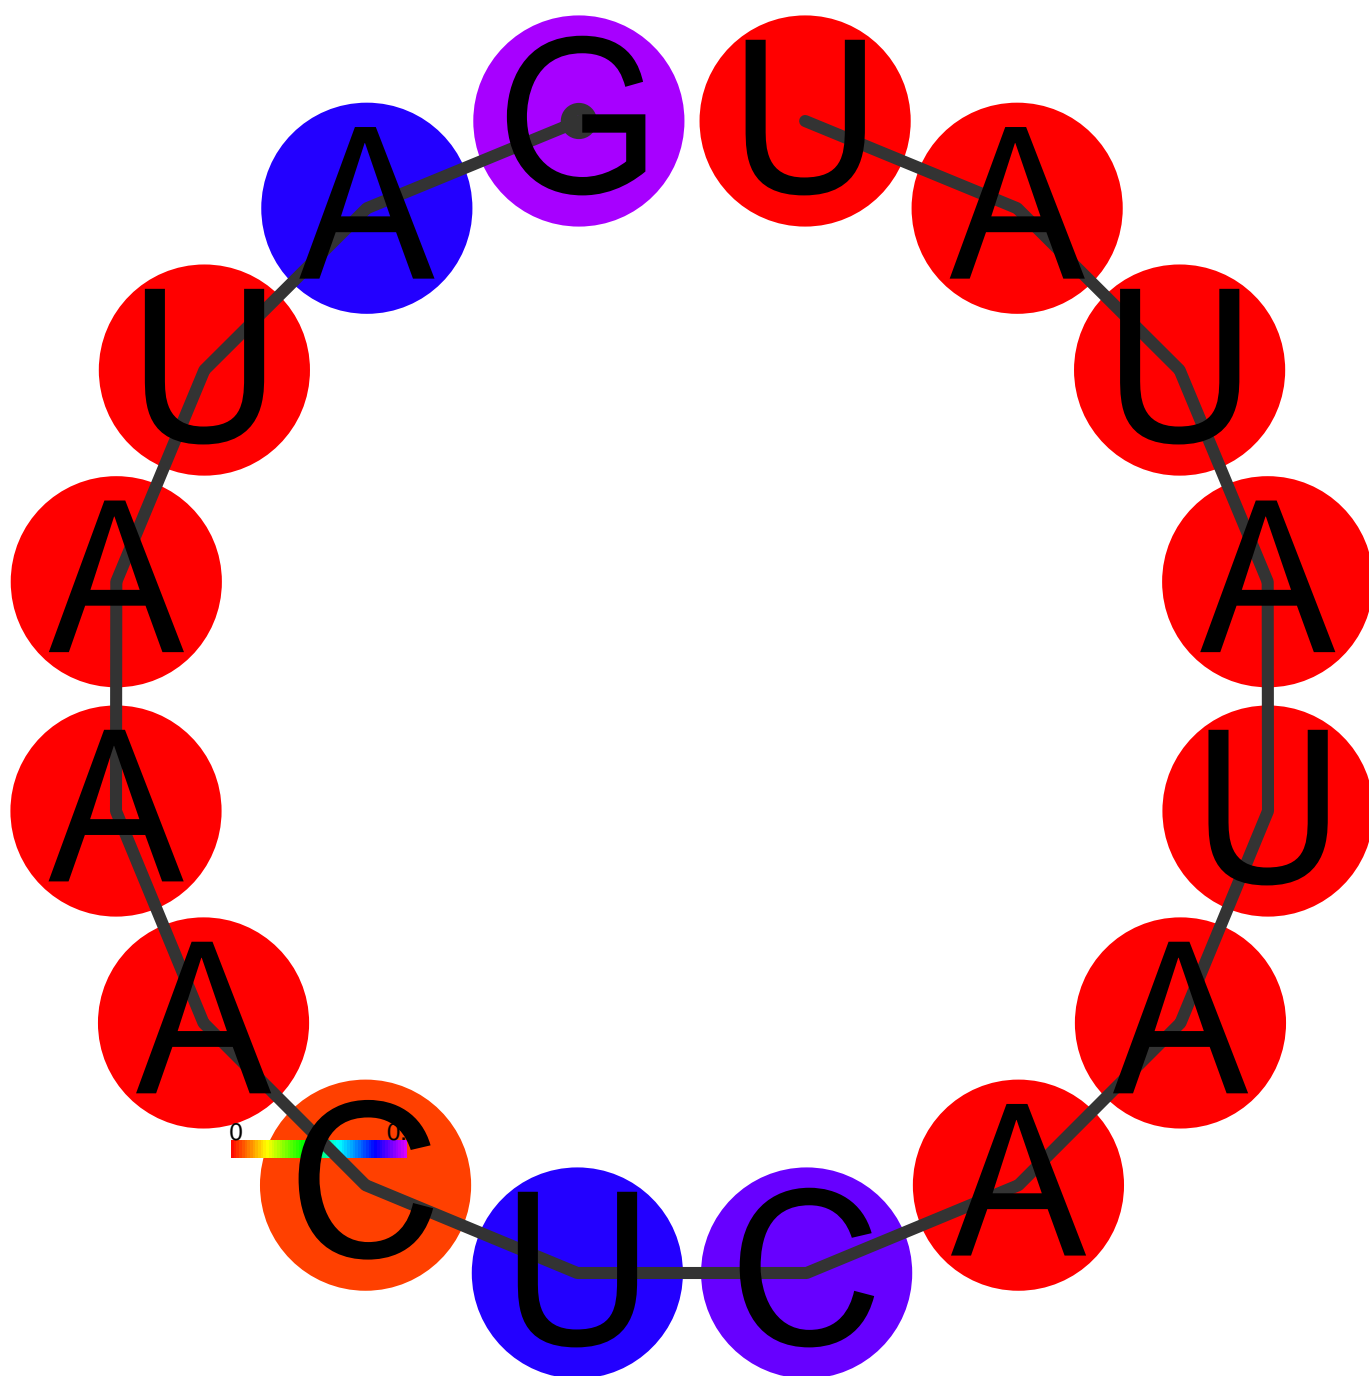

Supplement: Supplementary file 307 [file supplementary]

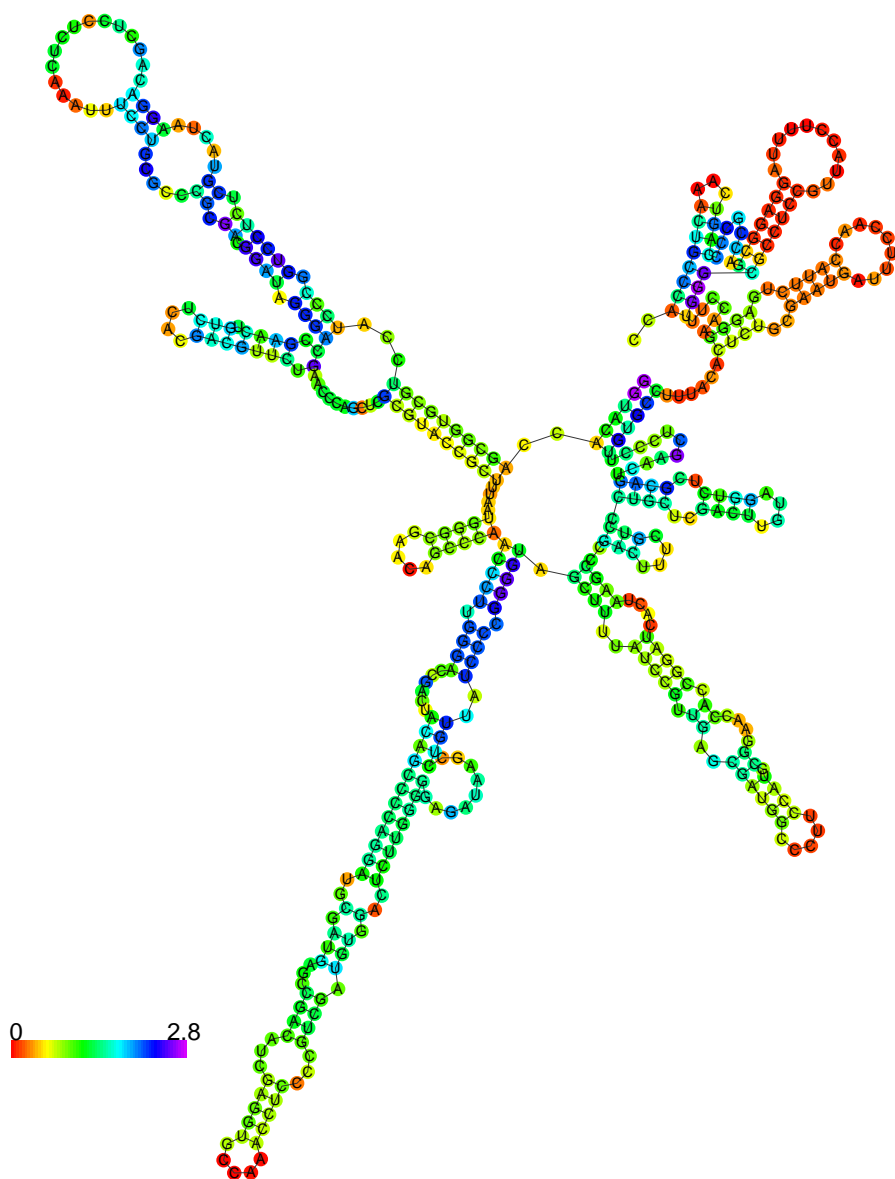

Supplement: Supplementary file 308 [file supplementary]

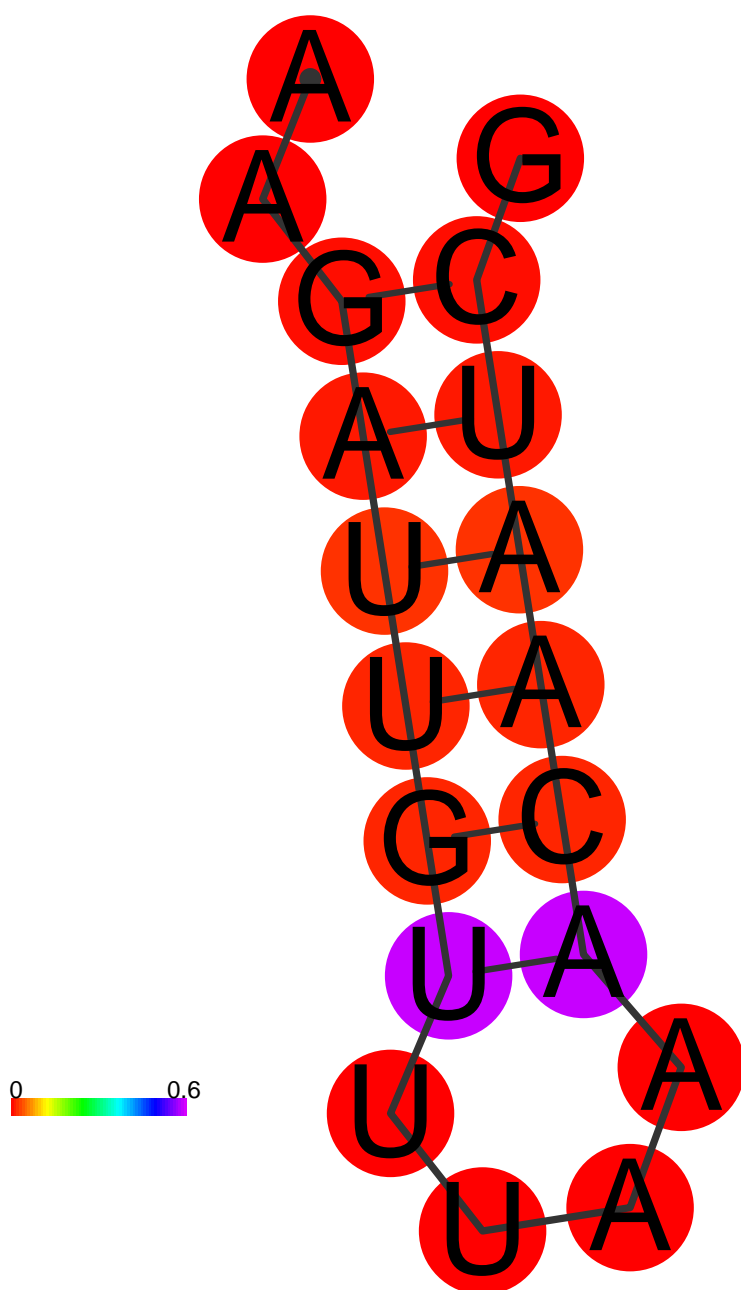

Supplement: Supplementary file 309 [file supplementary]

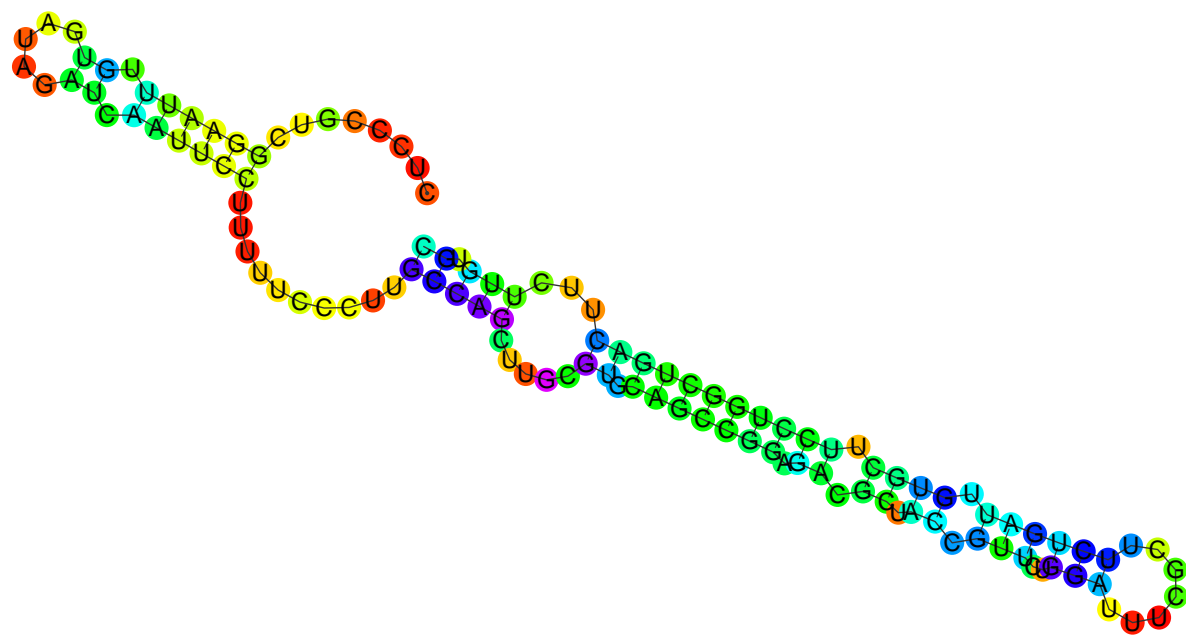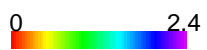

Supplement: Supplementary file 310 [file supplementary]

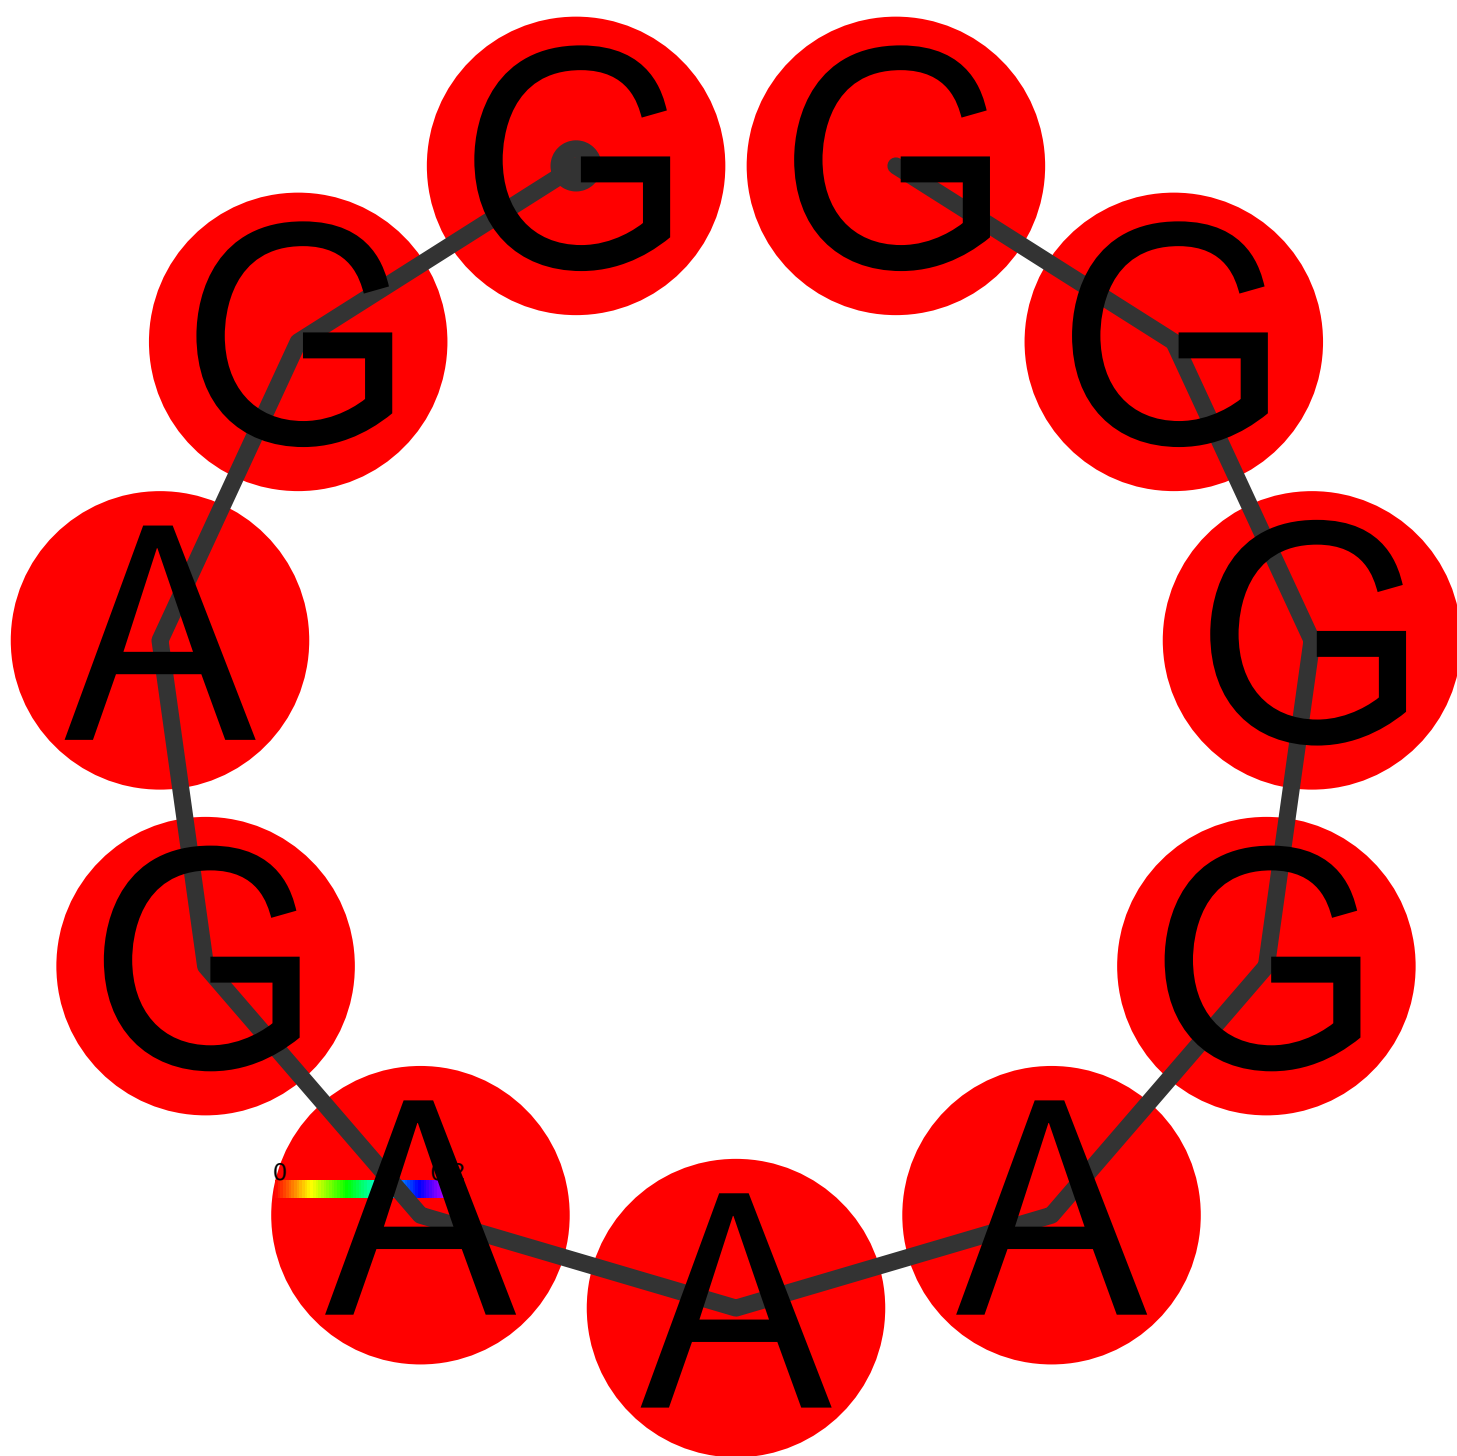

Supplement: Supplementary file 311 [file supplementary]

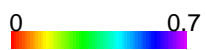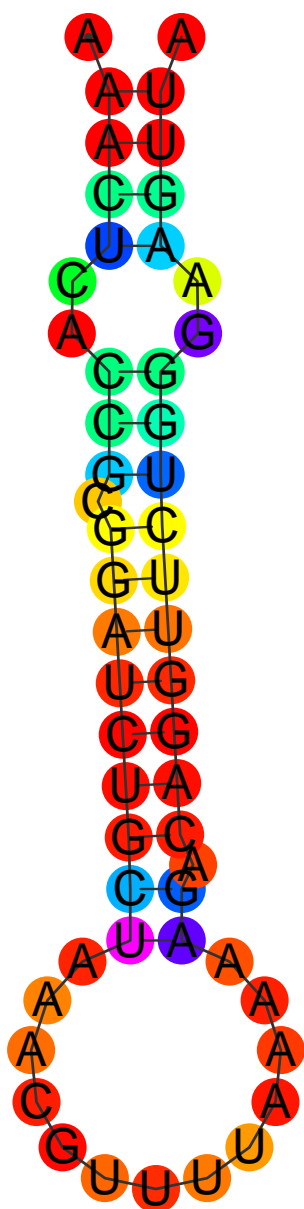

Supplement: Supplementary file 312 [file supplementary]

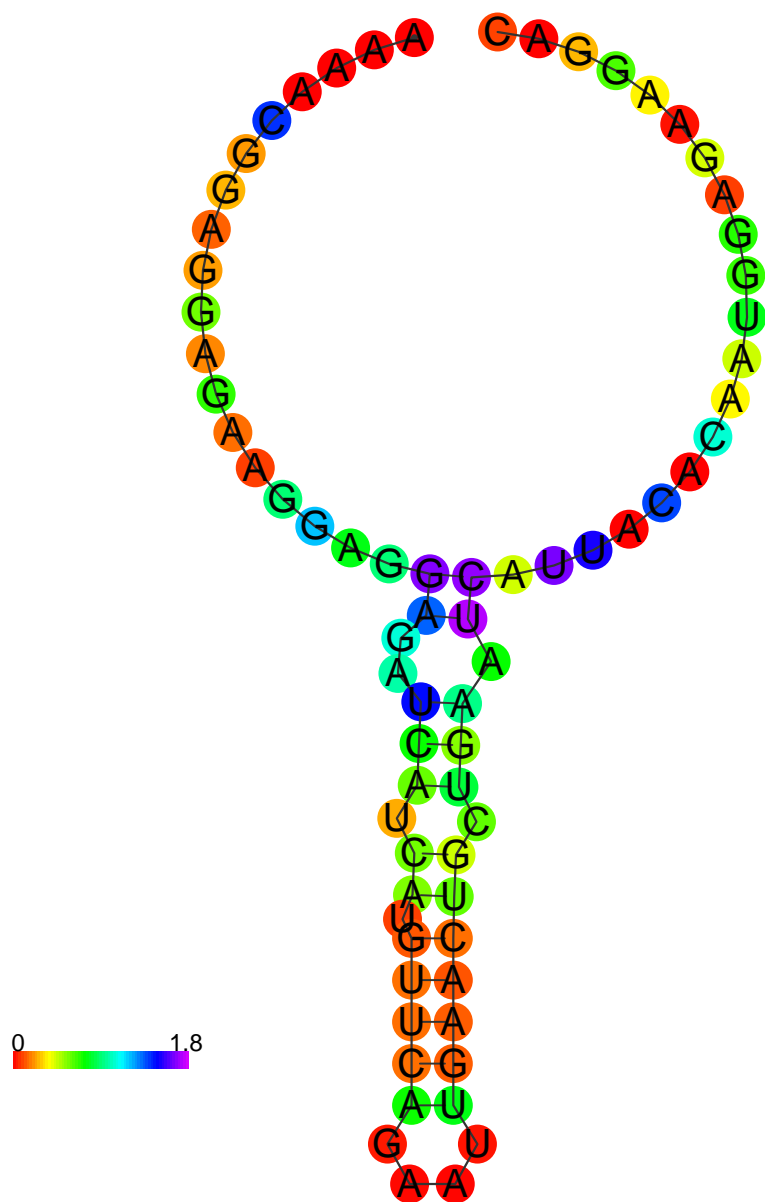

Supplement: Supplementary file 313 [file supplementary]

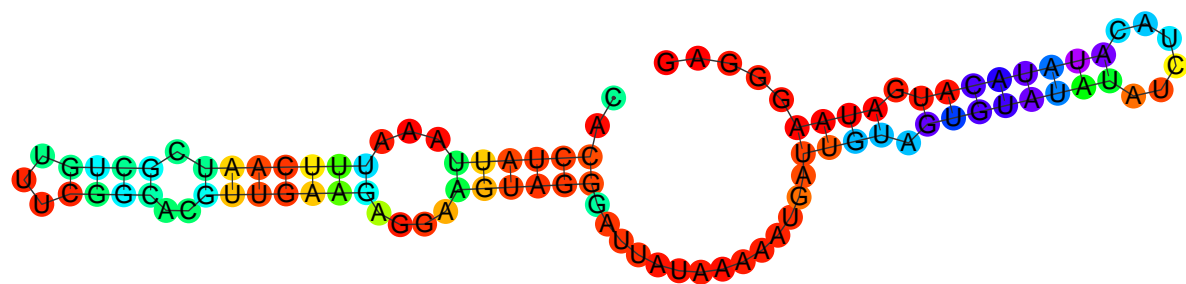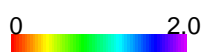

Supplement: Supplementary file 314 [file supplementary]

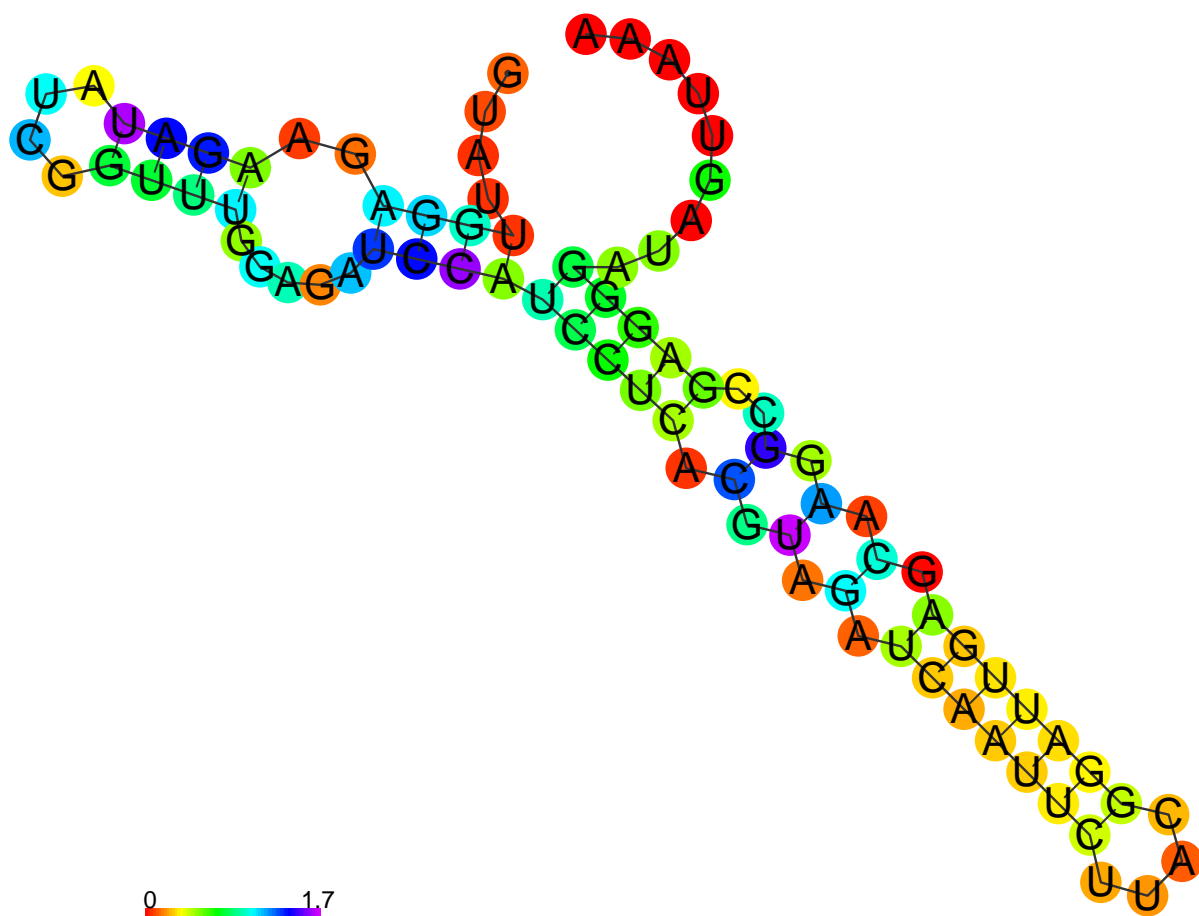

Supplement: Supplementary file 315 [file supplementary]

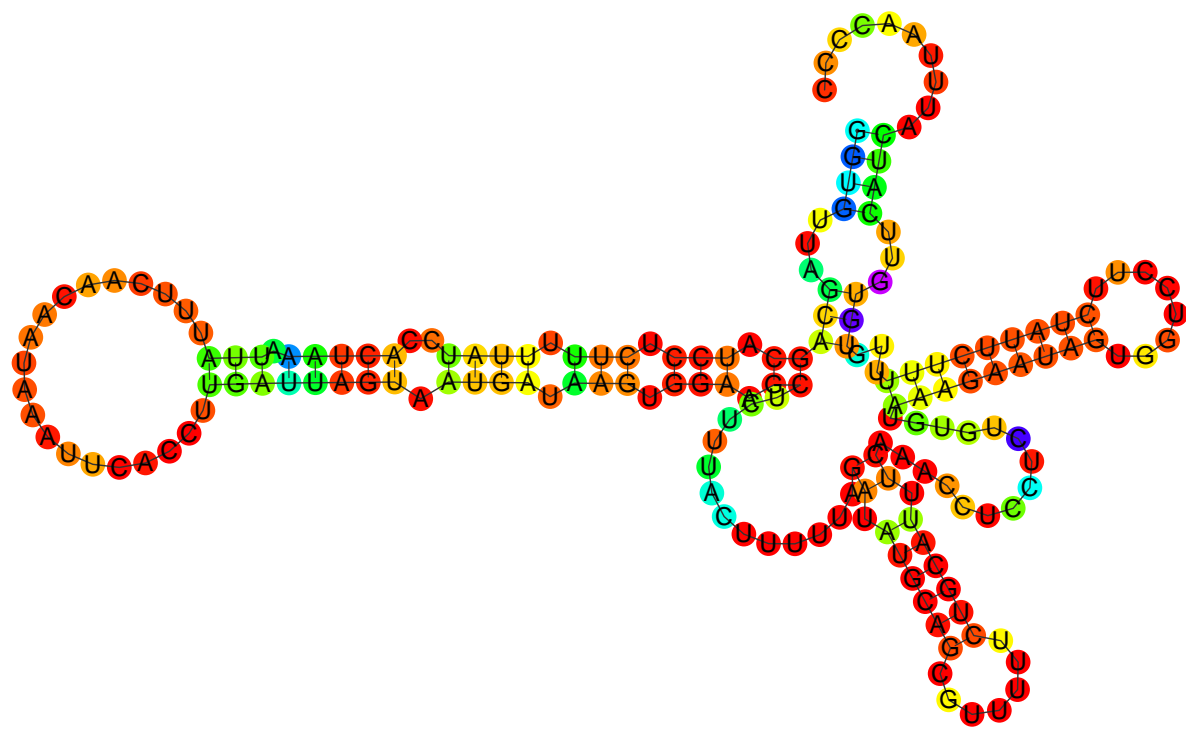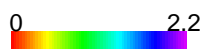

Supplement: Supplementary file 316 [file supplementary]

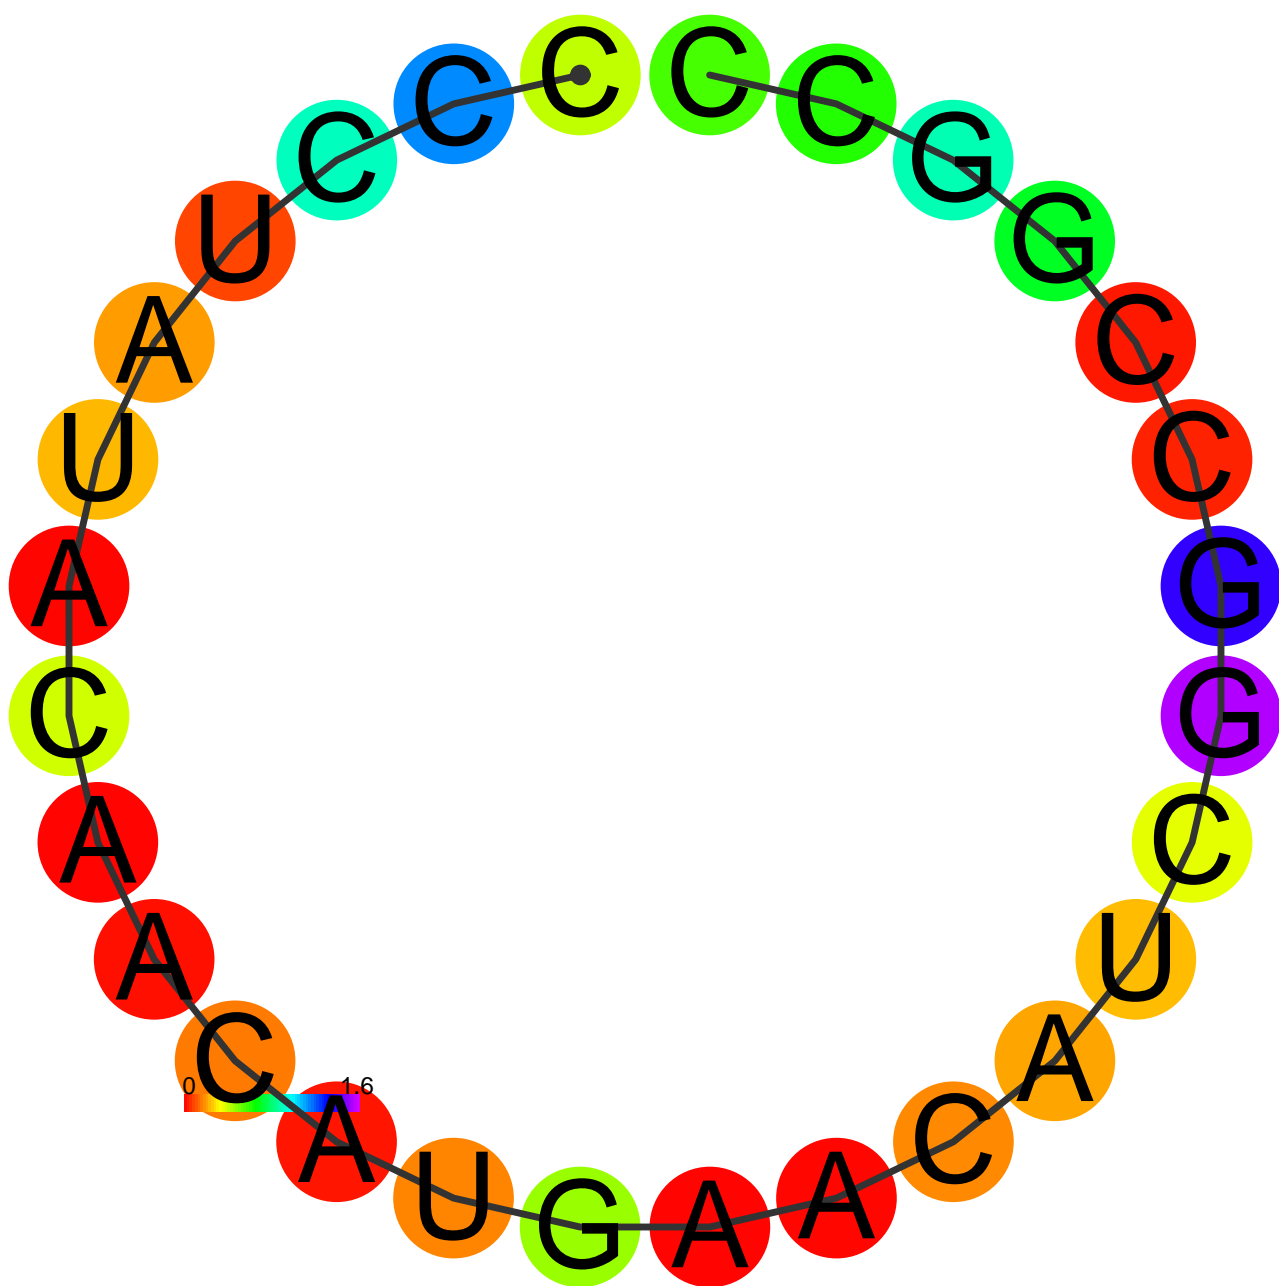

Supplement: Supplementary file 317 [file supplementary]

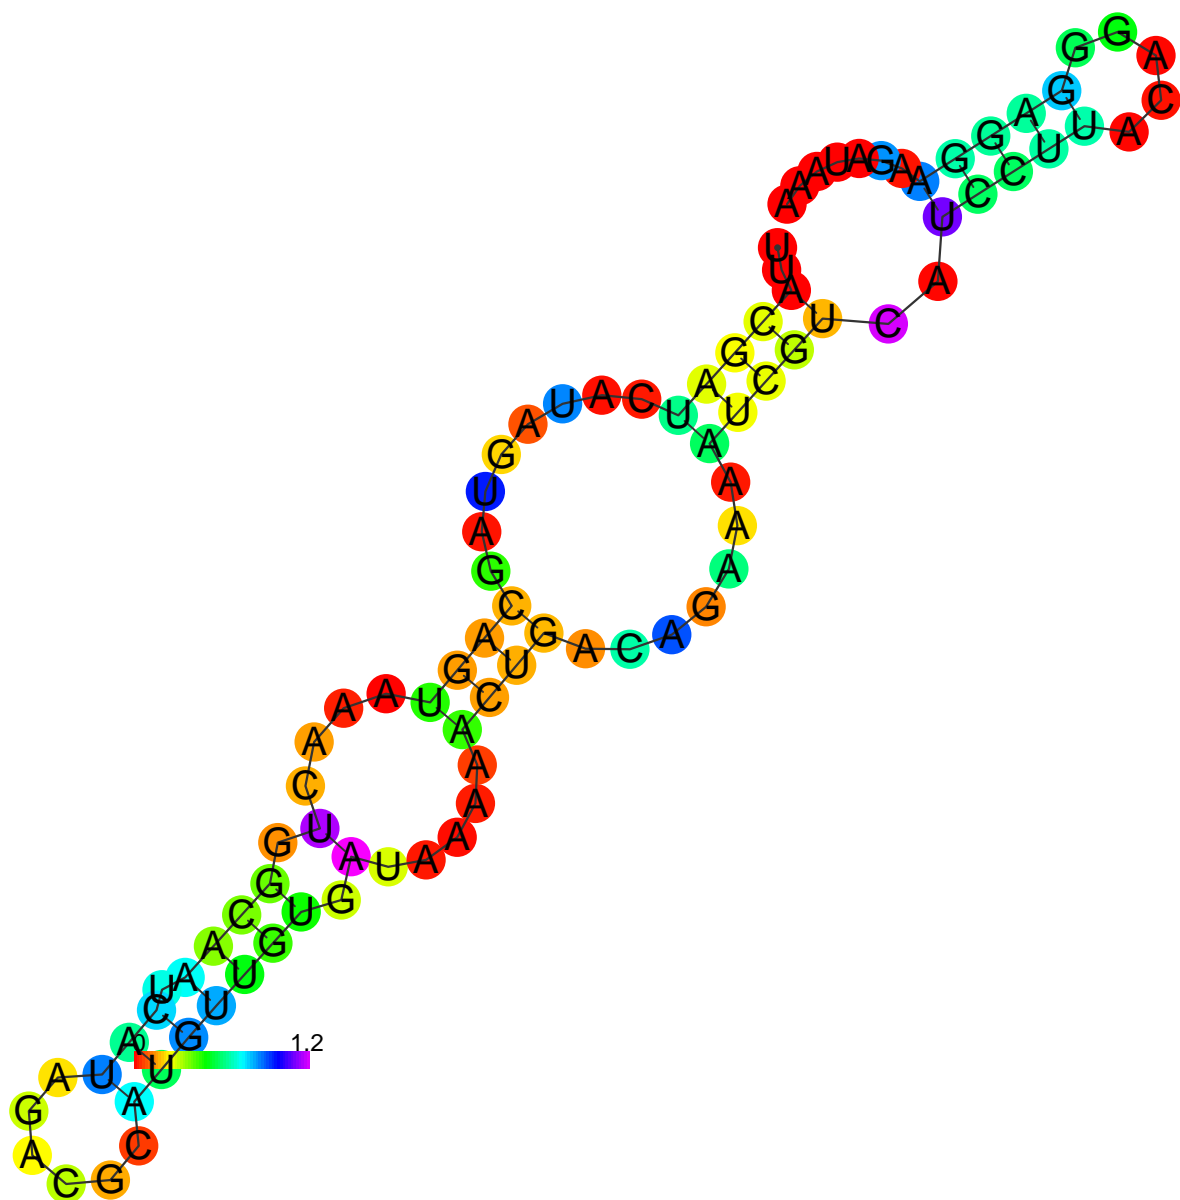

Supplement: Supplementary file 318 [file supplementary]

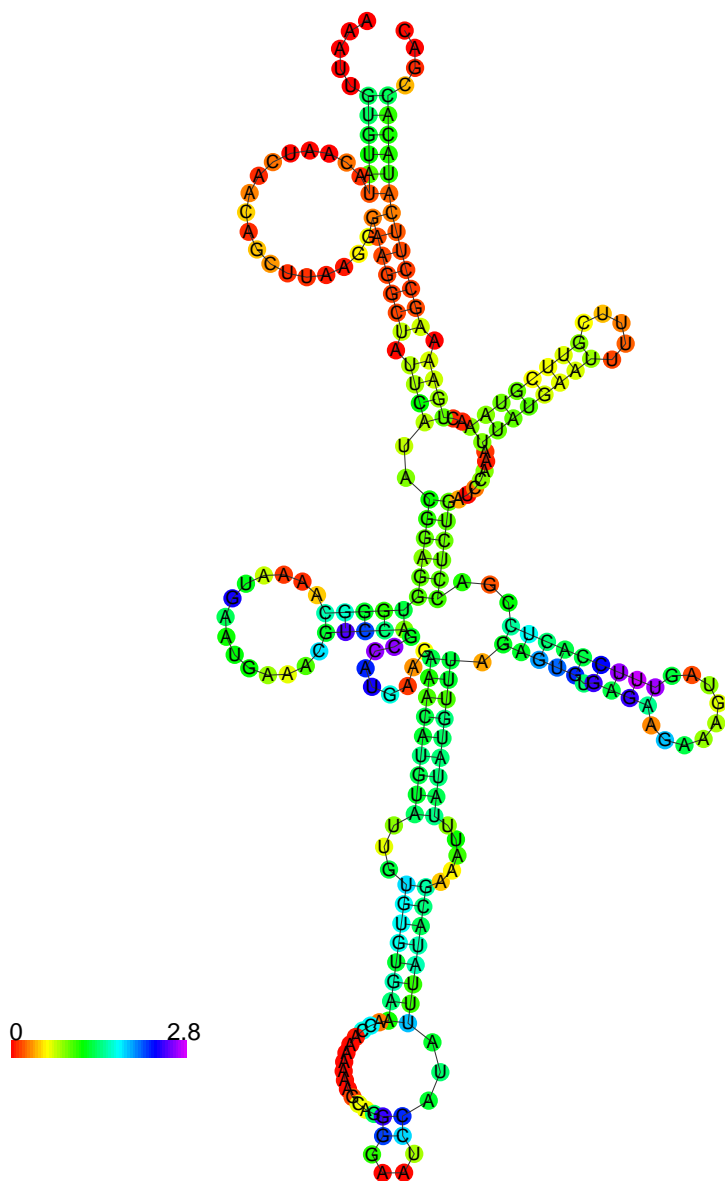

Supplement: Supplementary file 319 [file supplementary]

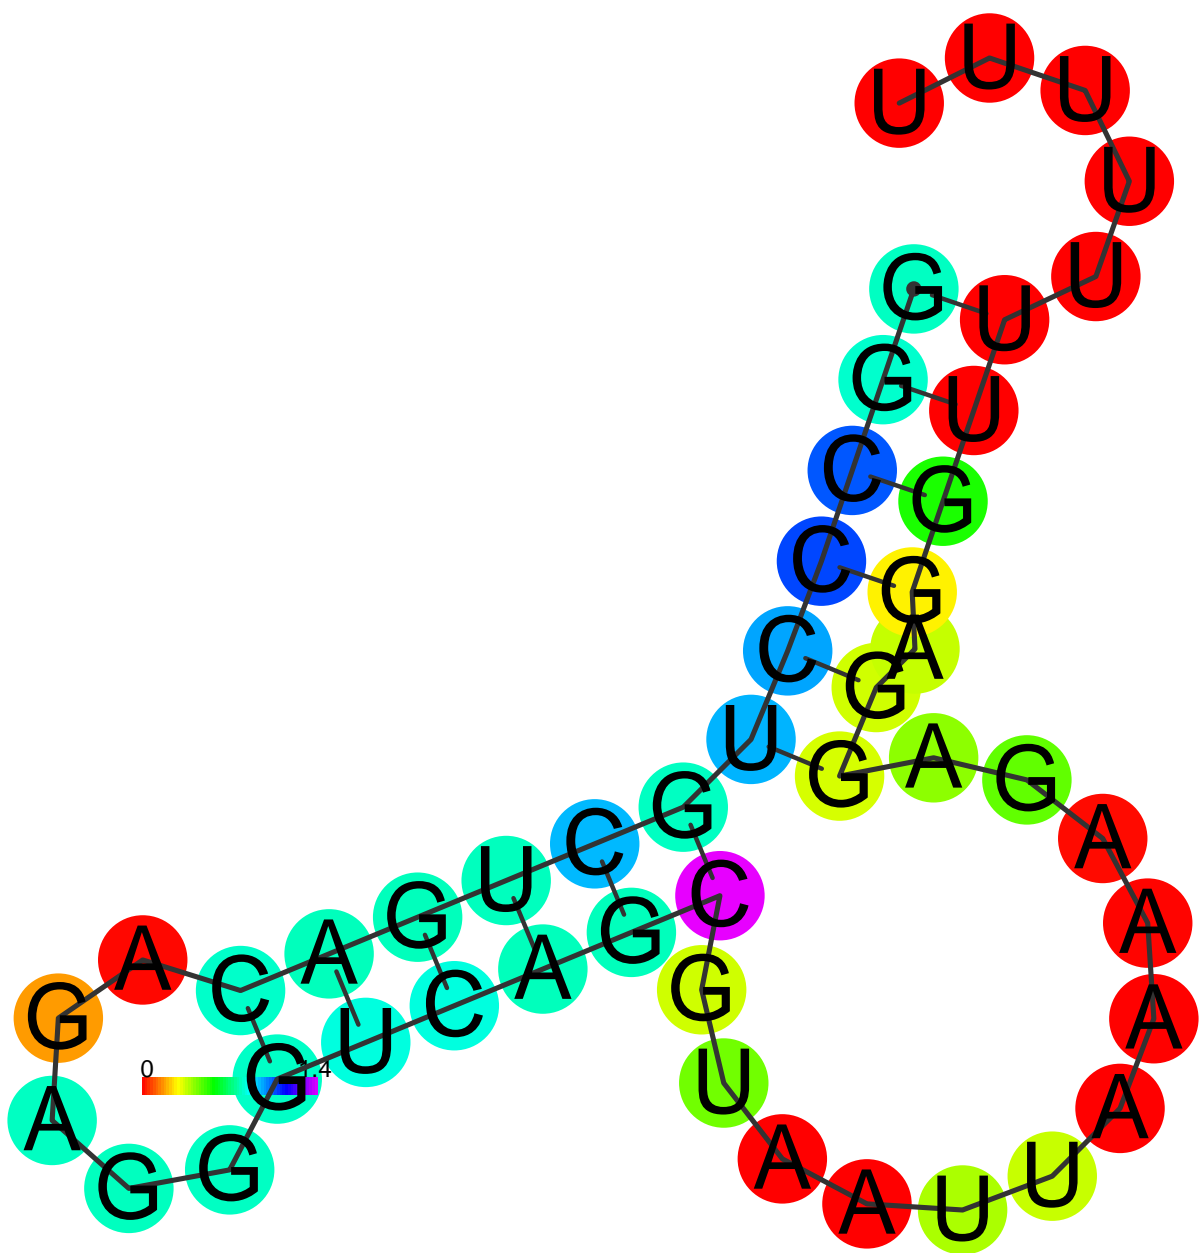

Supplement: Supplementary file 320 [file supplementary]

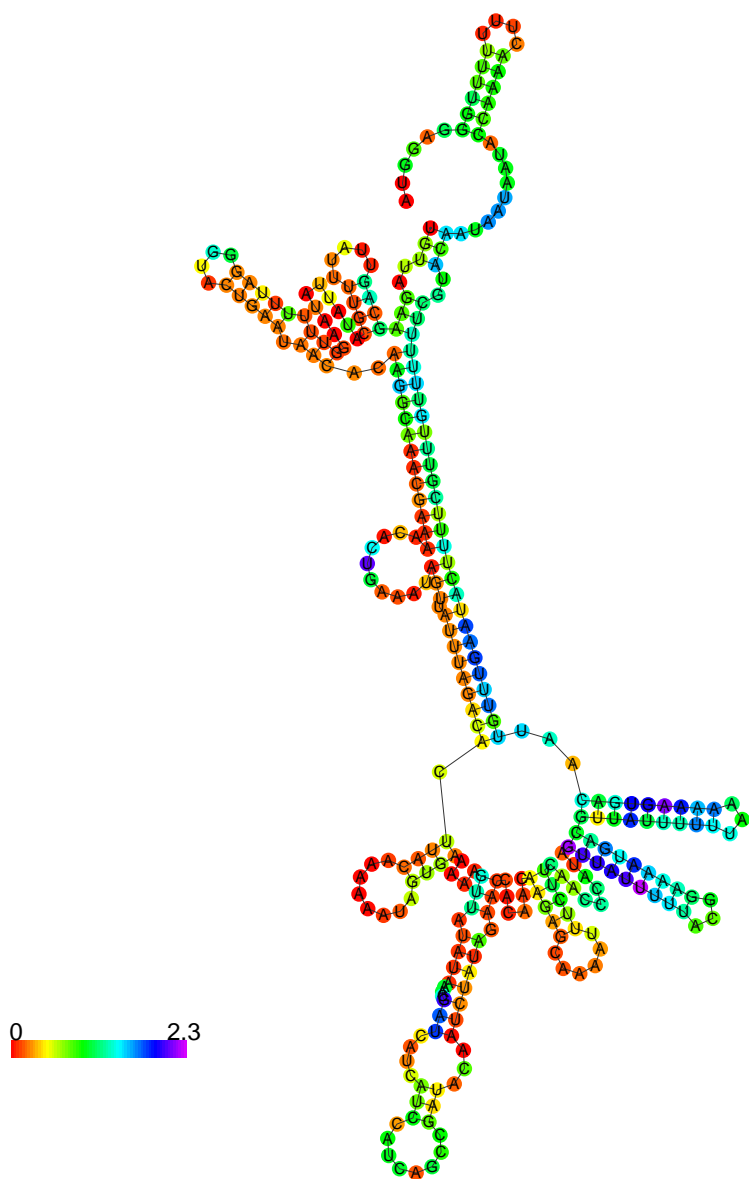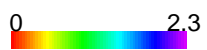

Supplement: Supplementary file 321 [file supplementary]

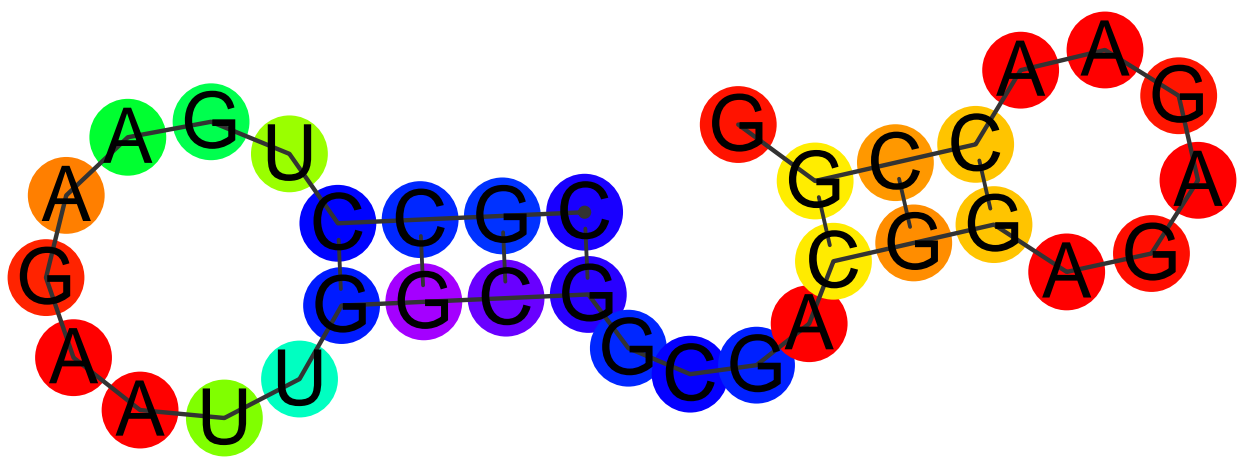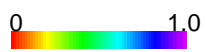

Supplement: Supplementary file 322 [file supplementary]

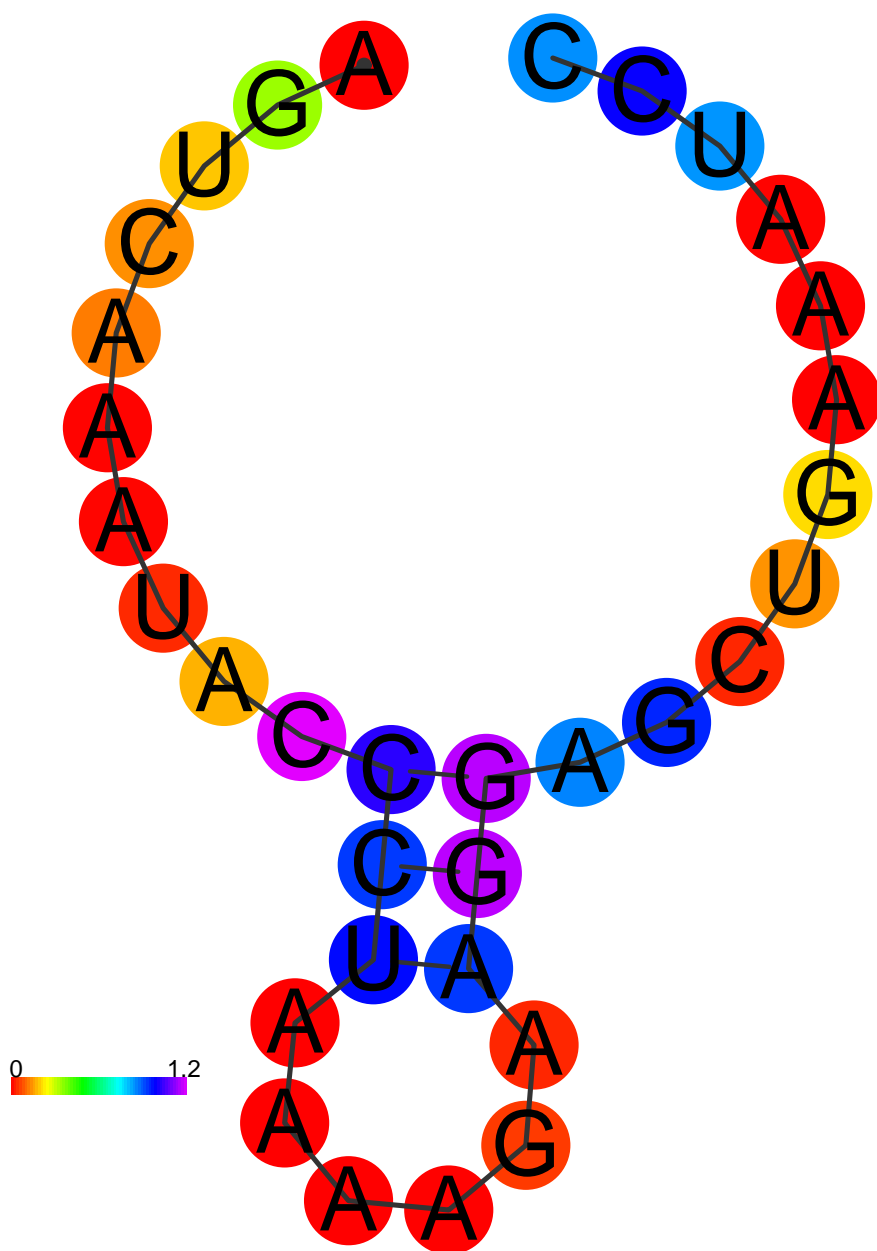

Supplement: Supplementary file 323 [file supplementary]

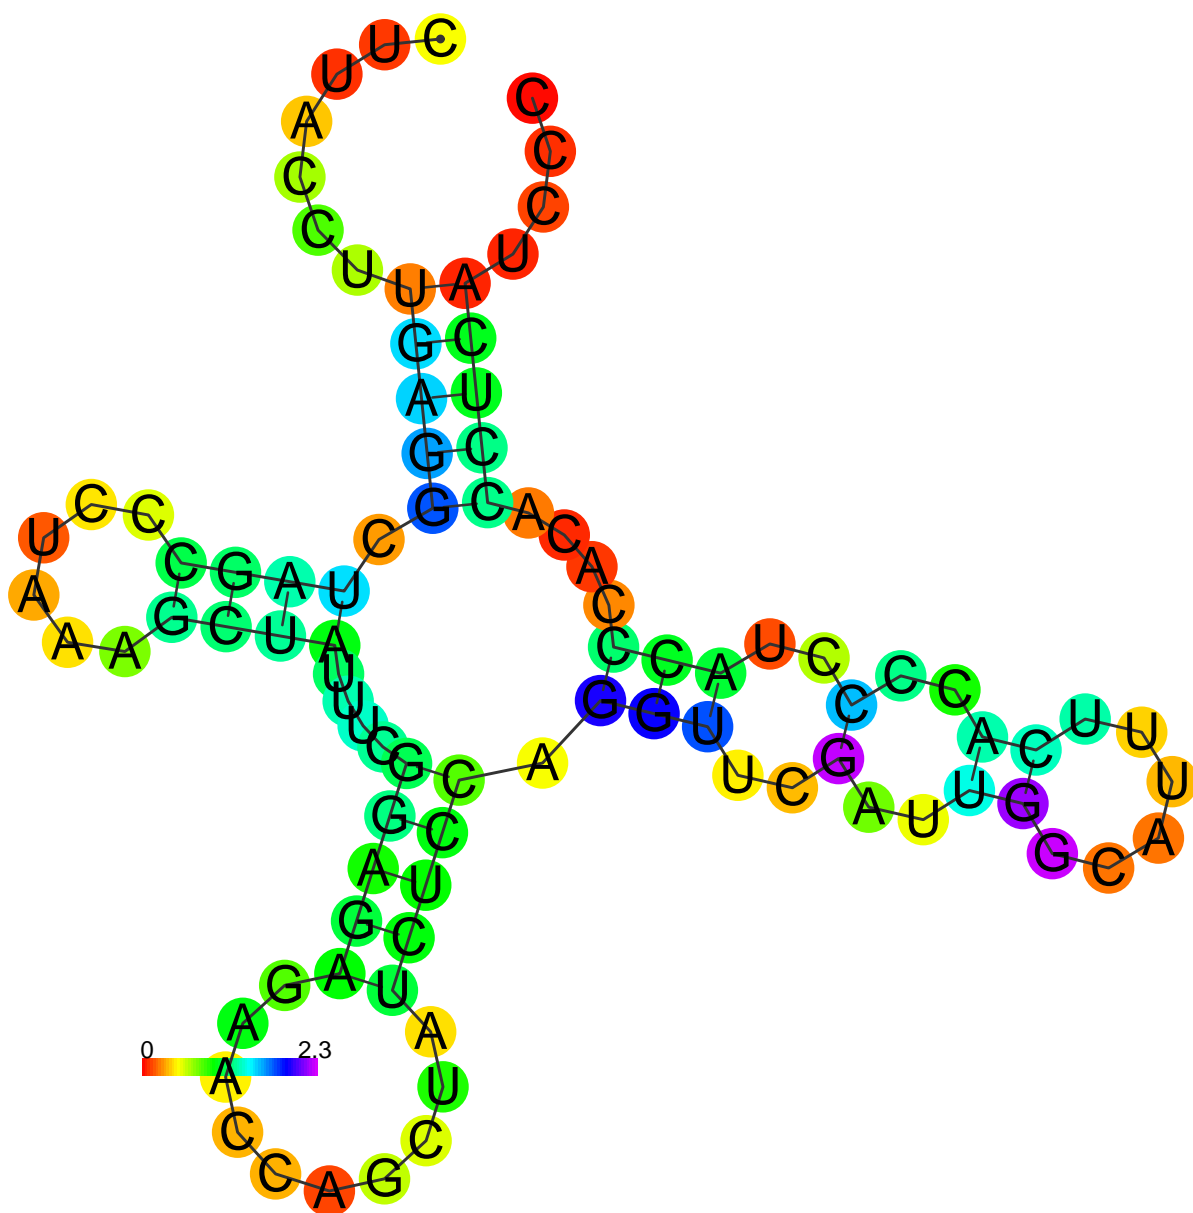

Supplement: Supplementary file 324 [file supplementary]

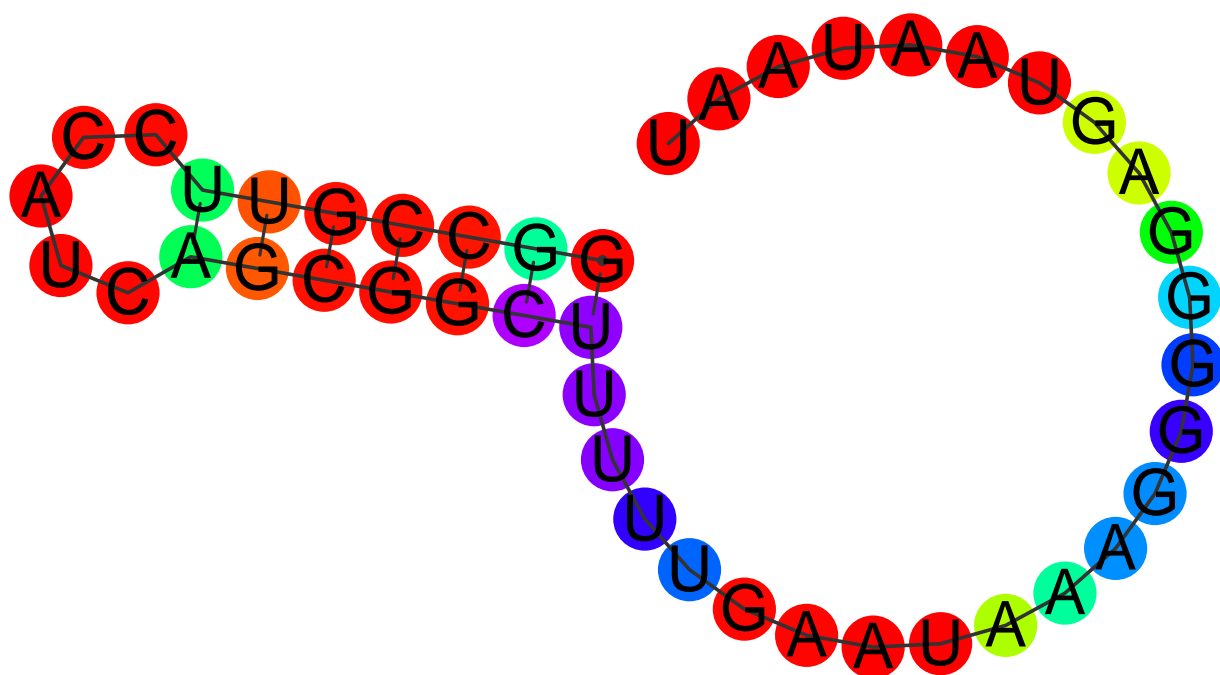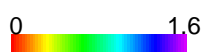

Supplement: Supplementary file 325 [file supplementary]

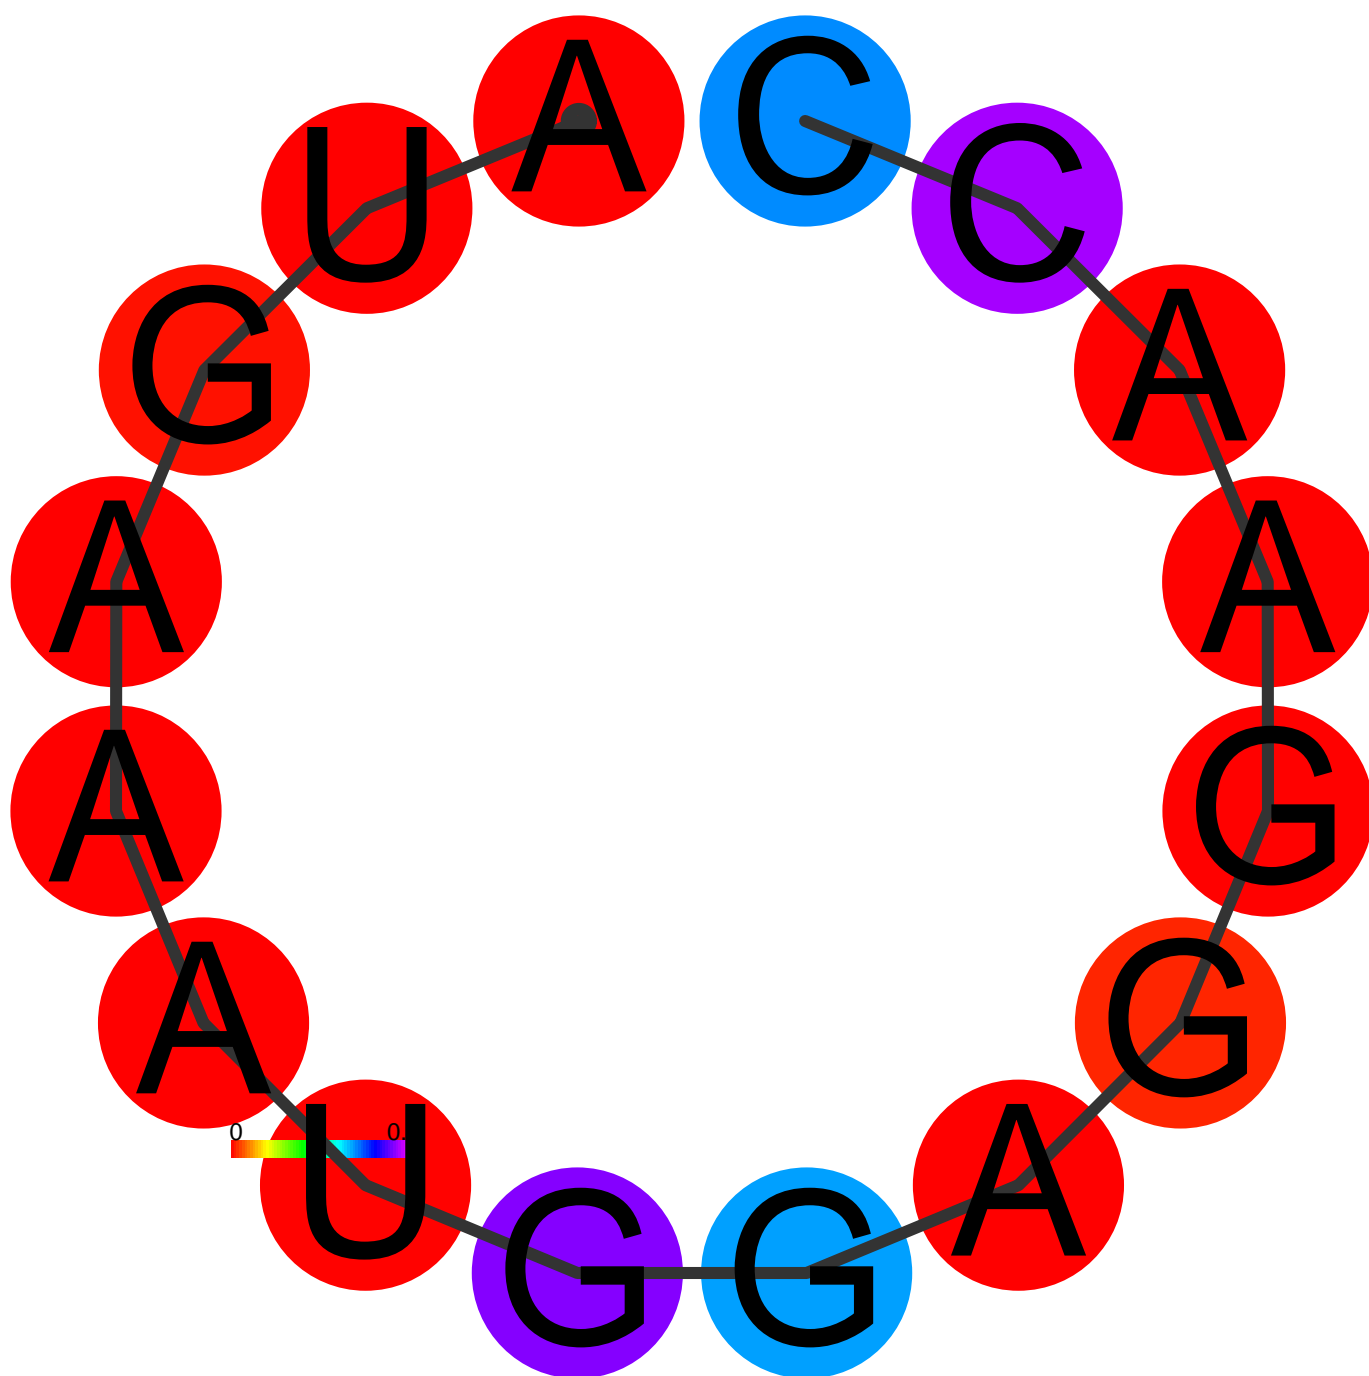

Supplement: Supplementary file 326 [file supplementary]

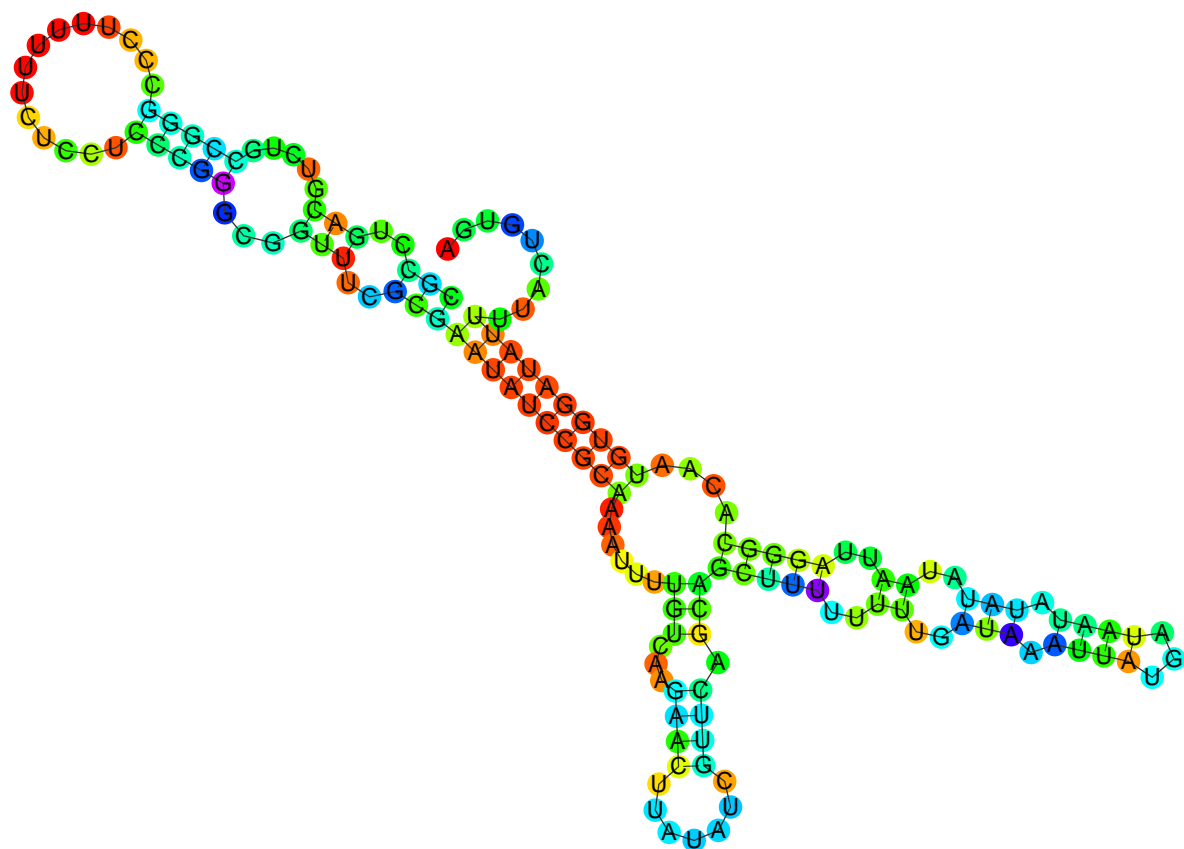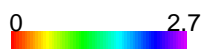

Supplement: Supplementary file 327 [file supplementary]

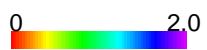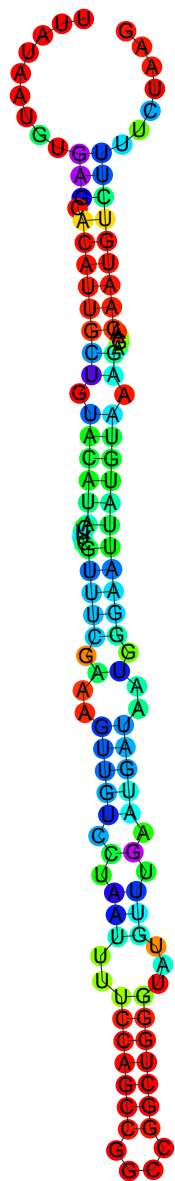

Supplement: Supplementary file 328 [file supplementary]

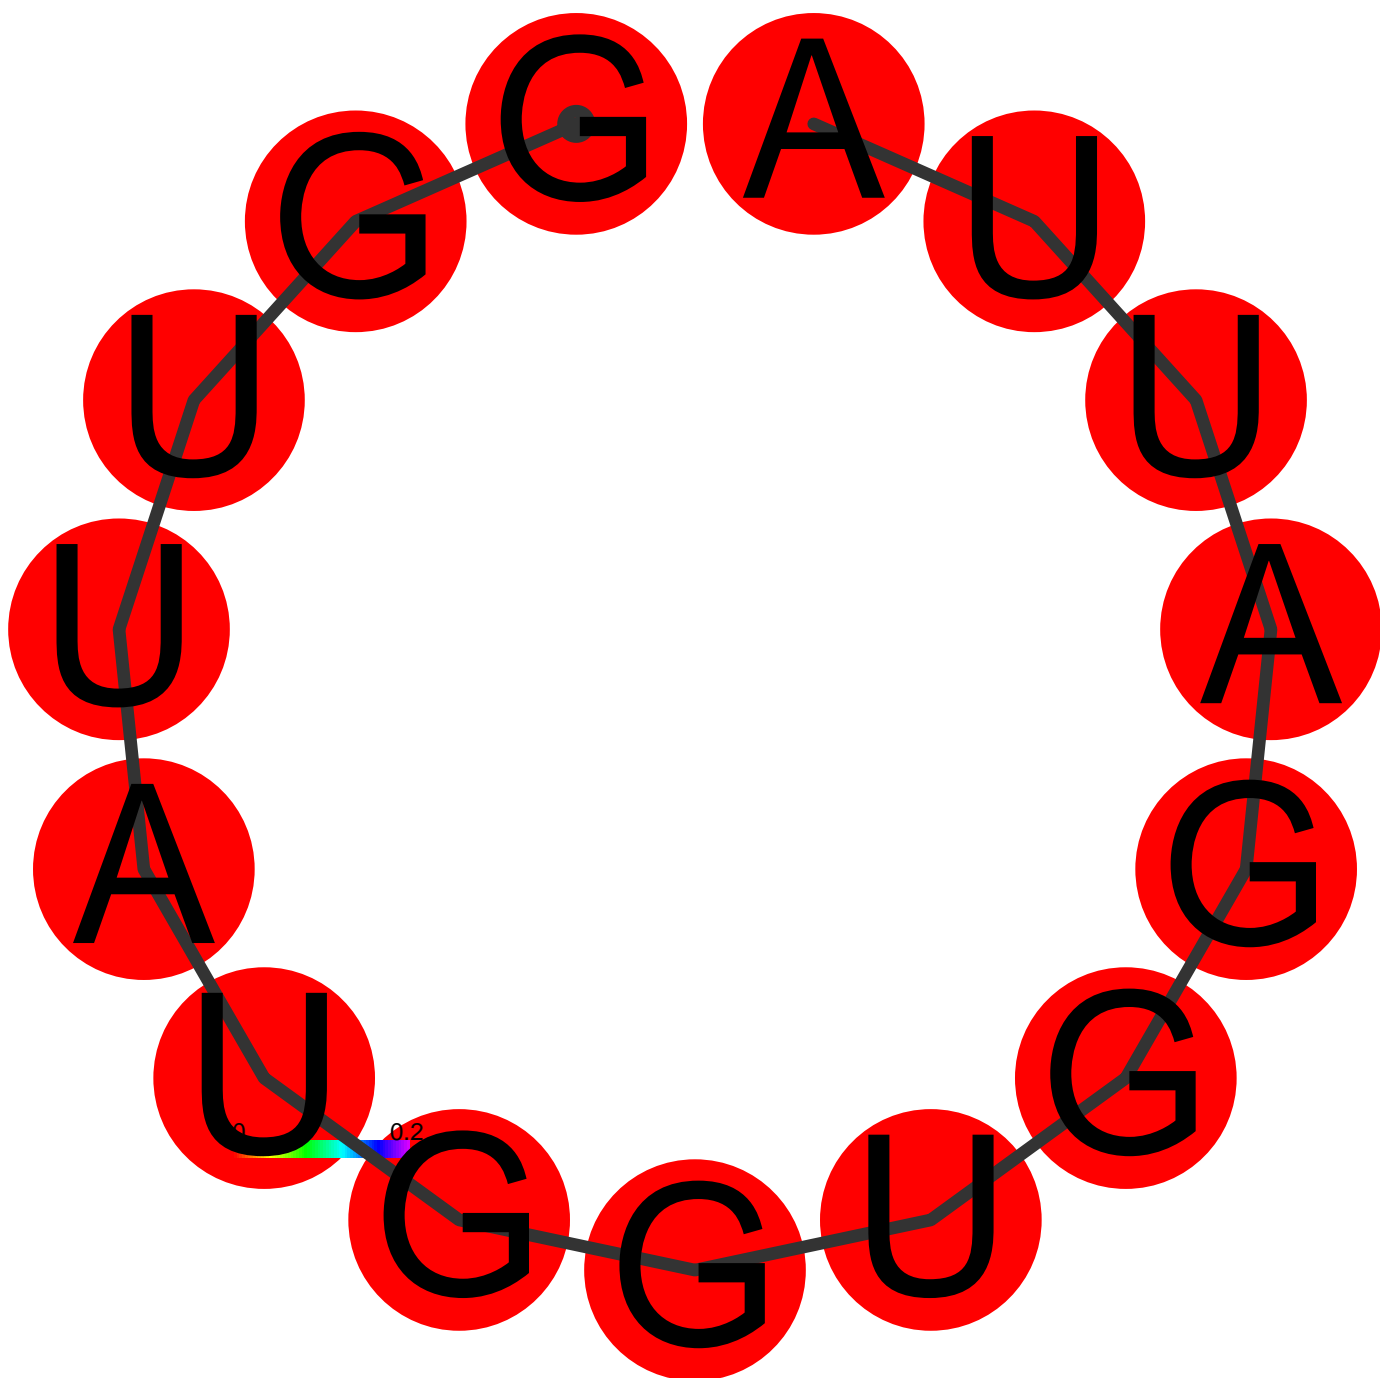

Supplement: Supplementary file 329 [file supplementary]

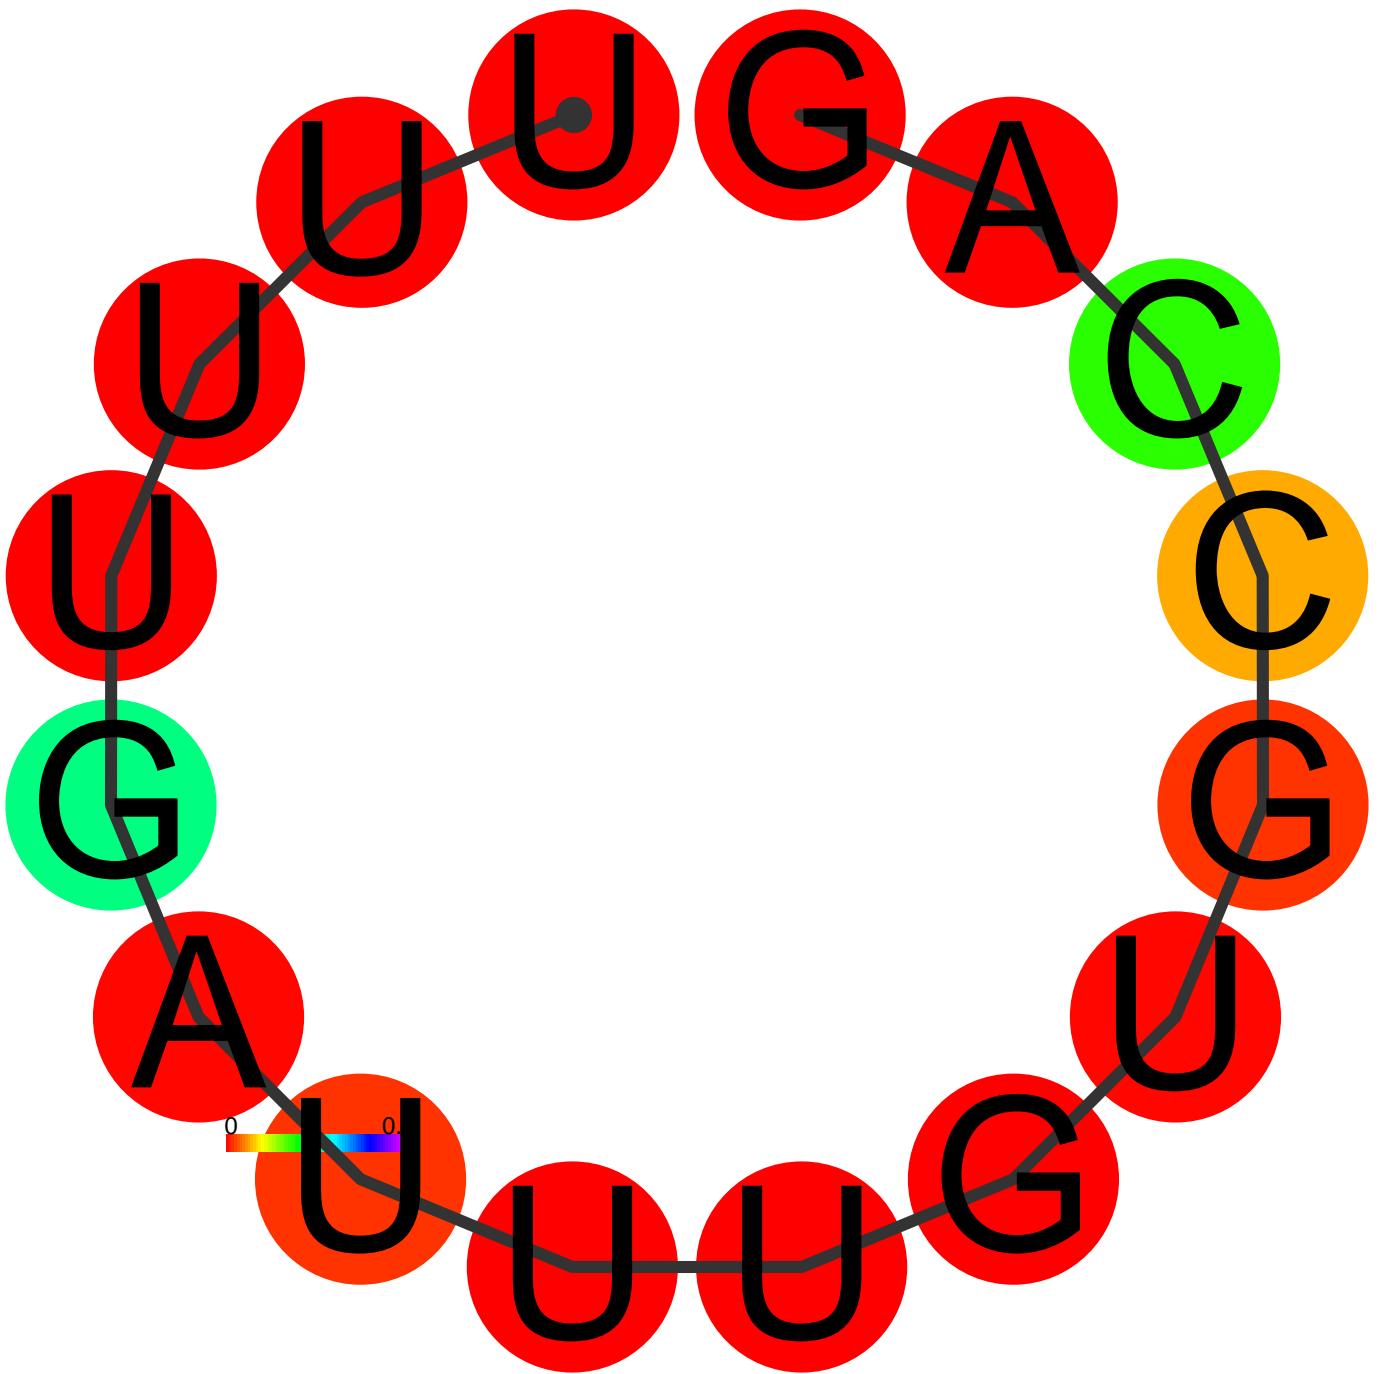

Supplement: Supplementary file 330 [file supplementary]

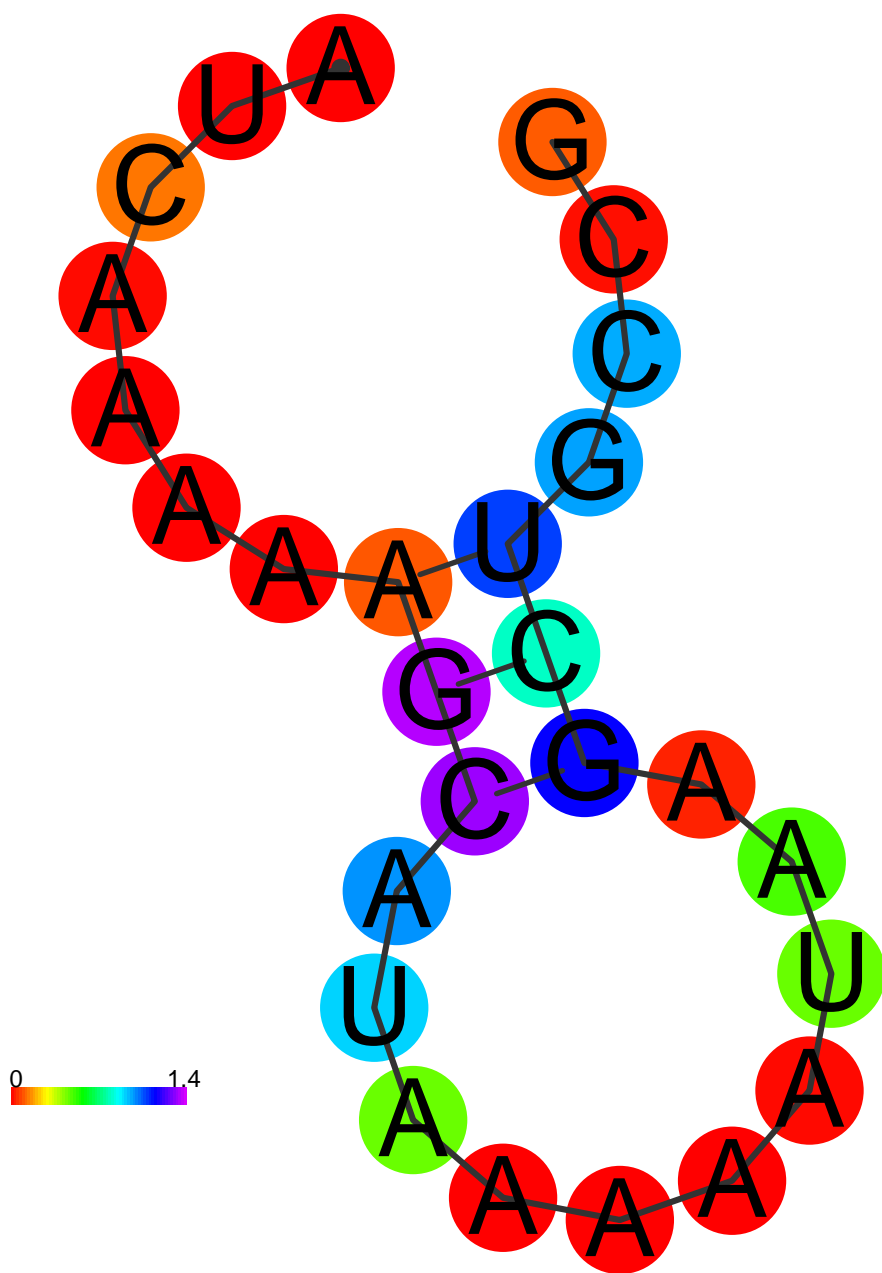

Supplement: Supplementary file 331 [file supplementary]

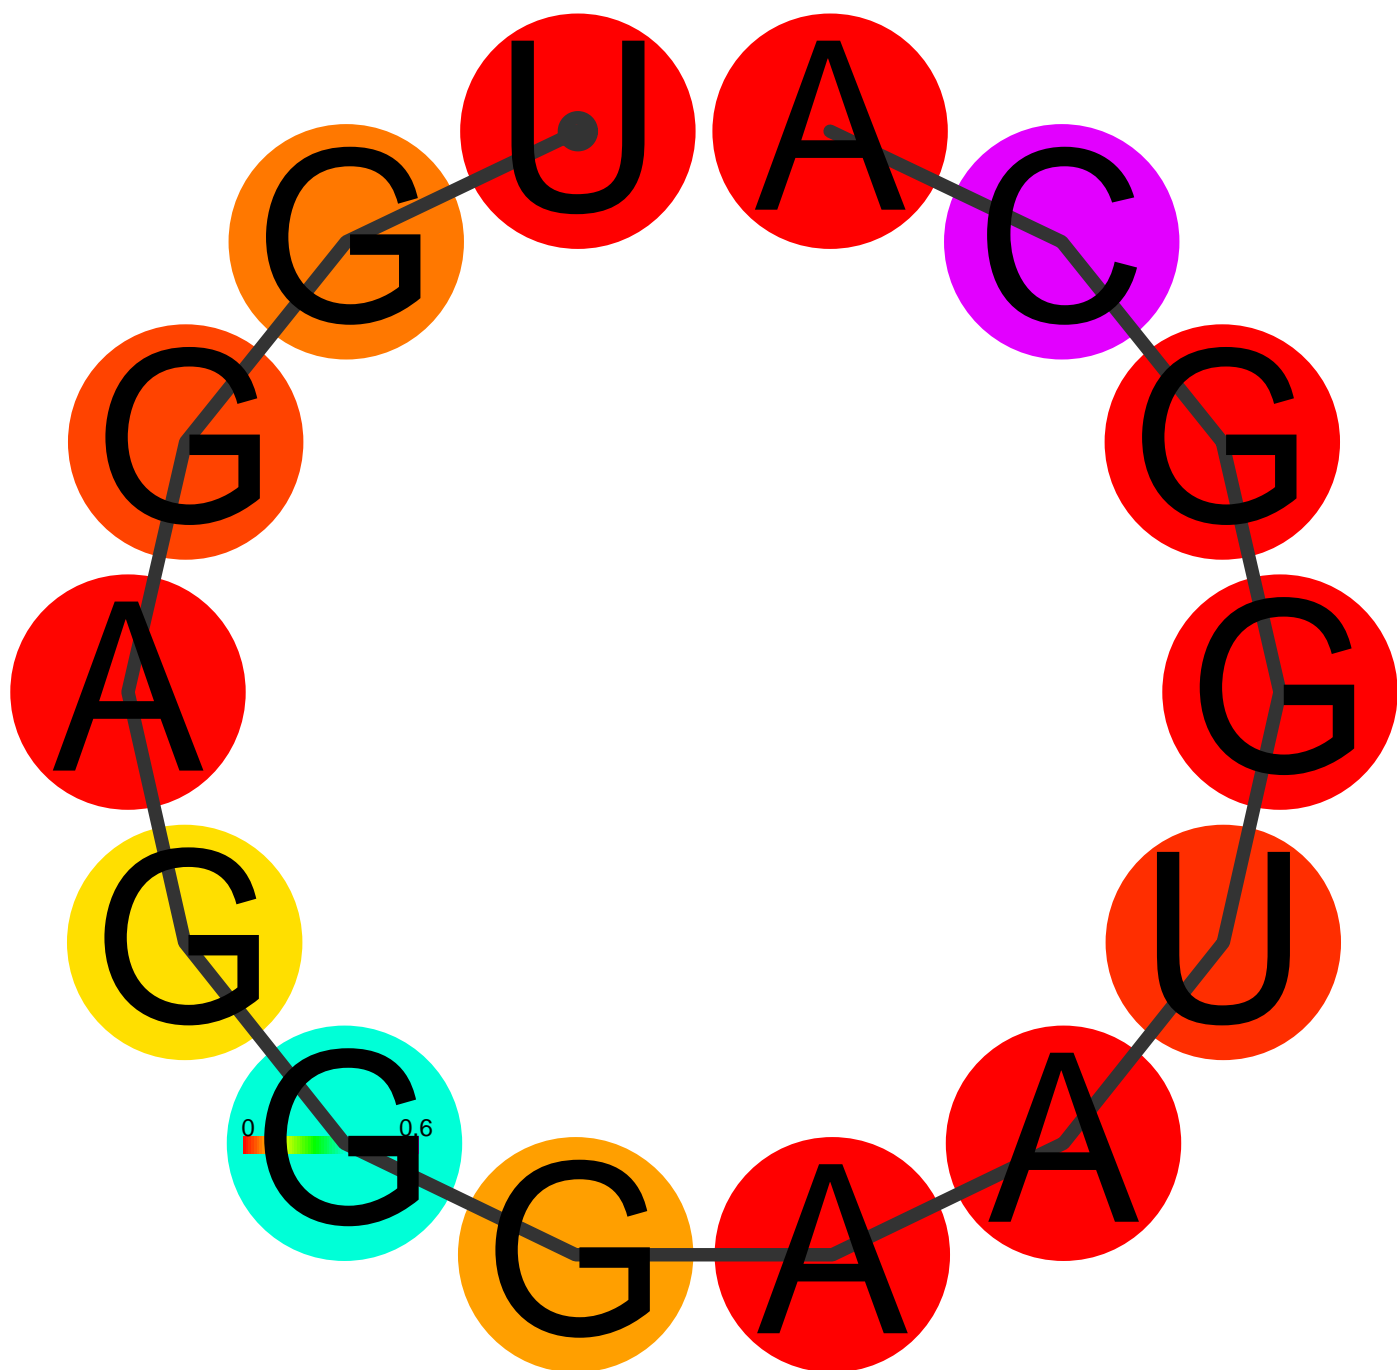

Supplement: Supplementary file 332 [file supplementary]

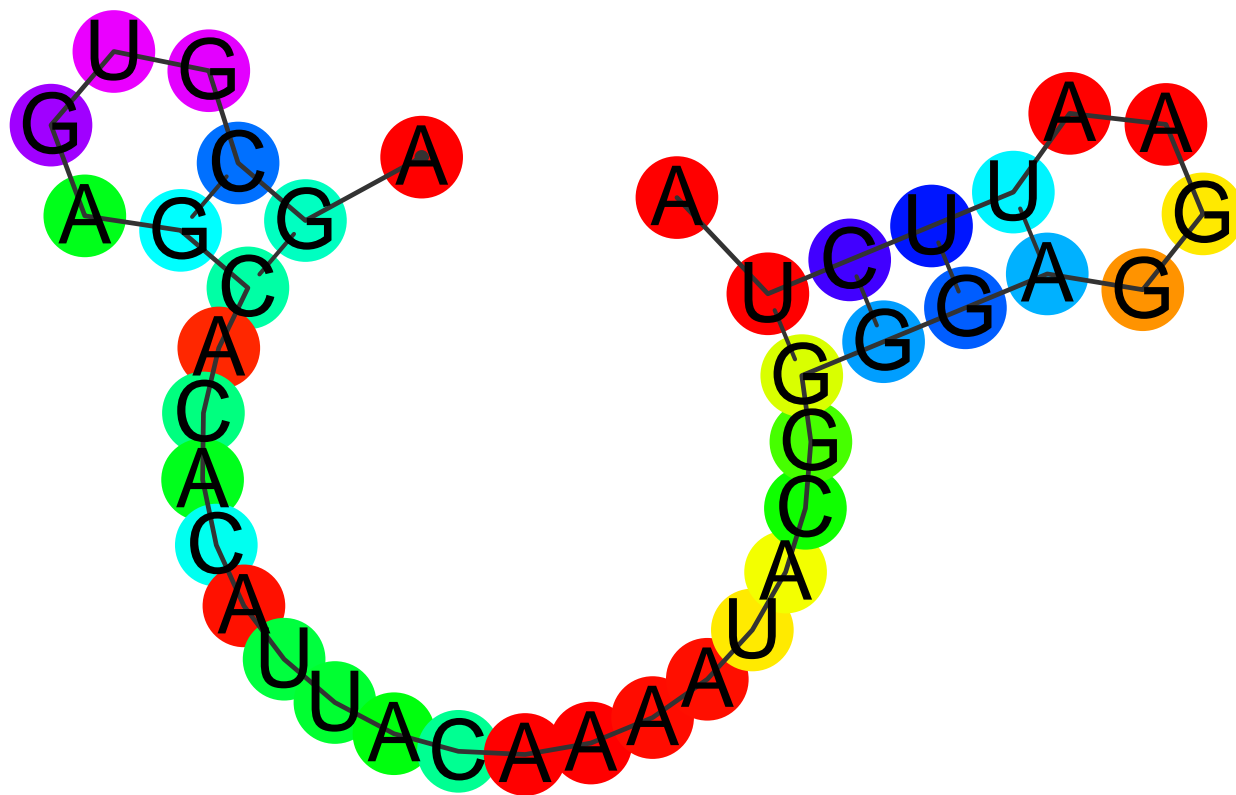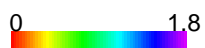

Supplement: Supplementary file 333 [file supplementary]

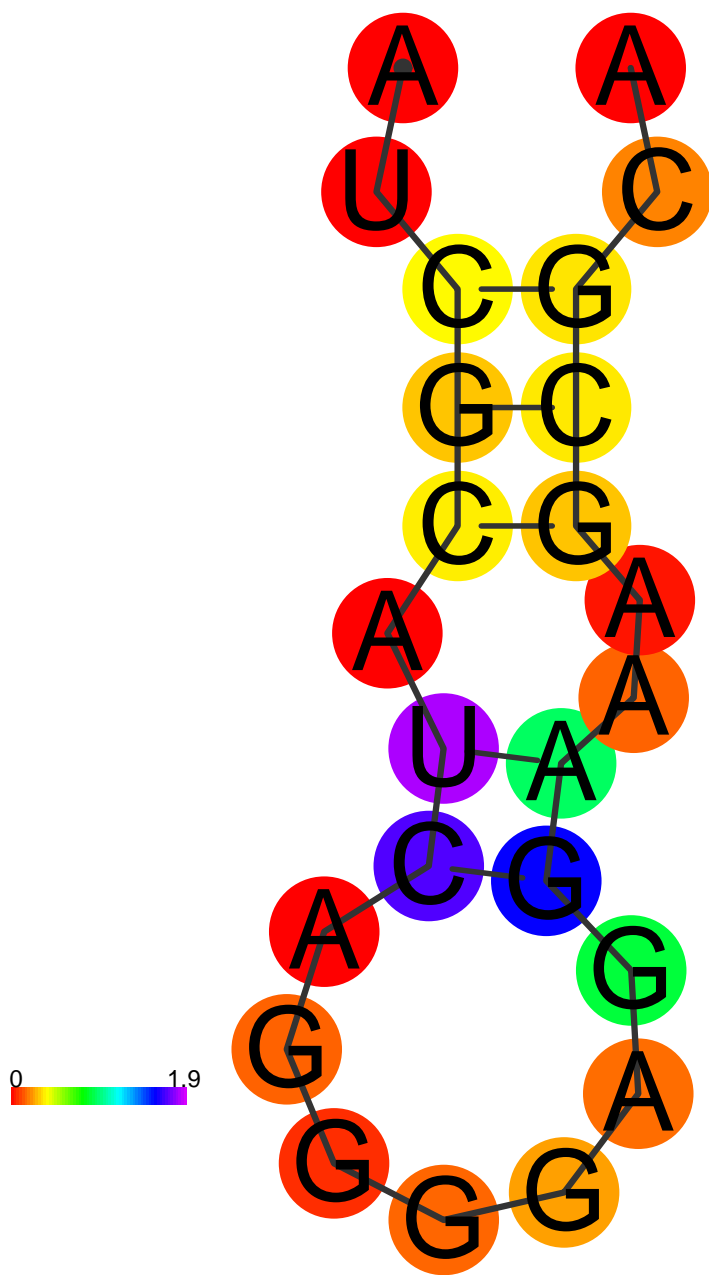

Supplement: Supplementary file 334 [file supplementary]

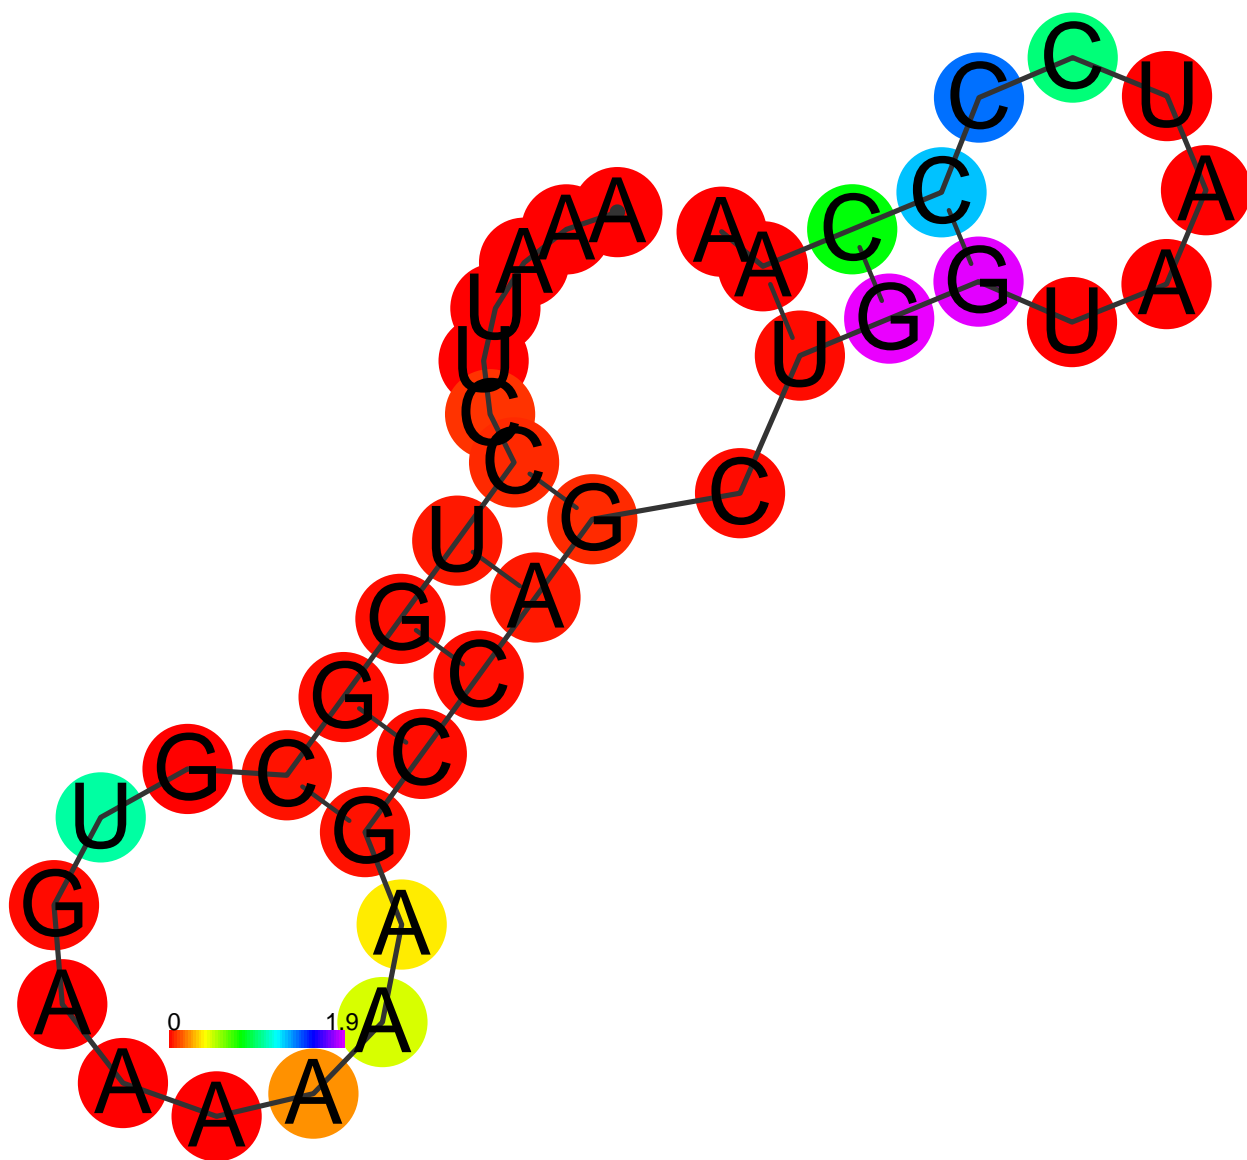

Supplement: Supplementary file 335 [file supplementary]

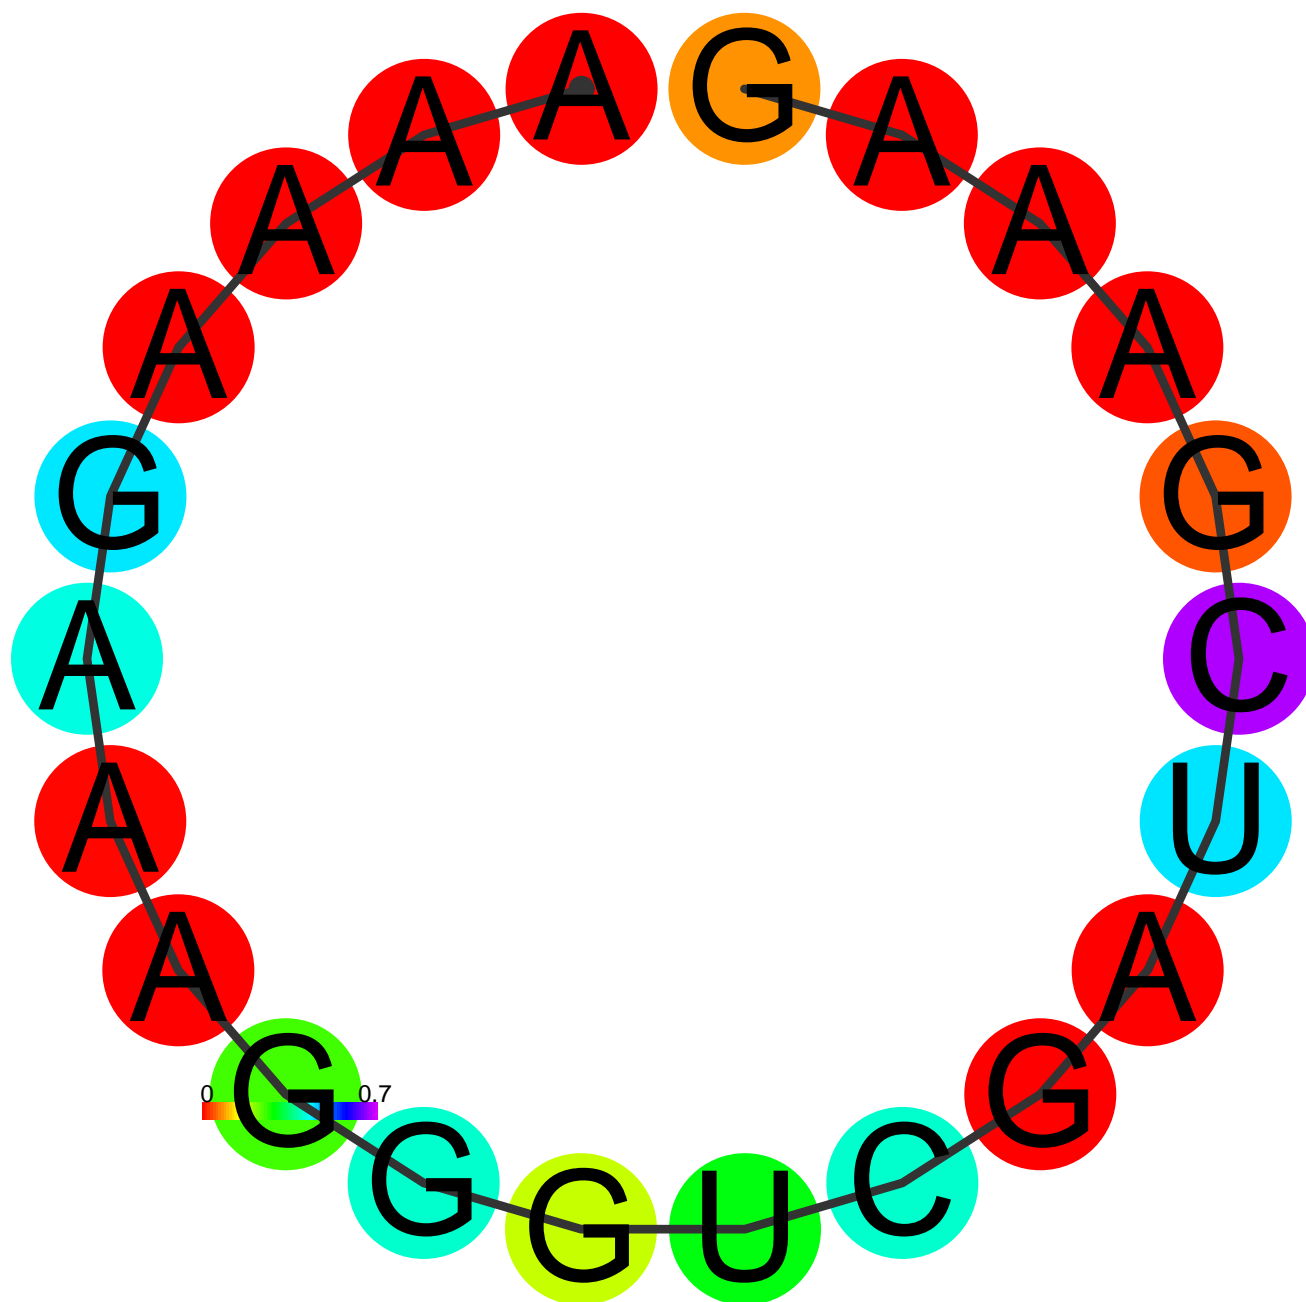

Supplement: Supplementary file 336 [file supplementary]

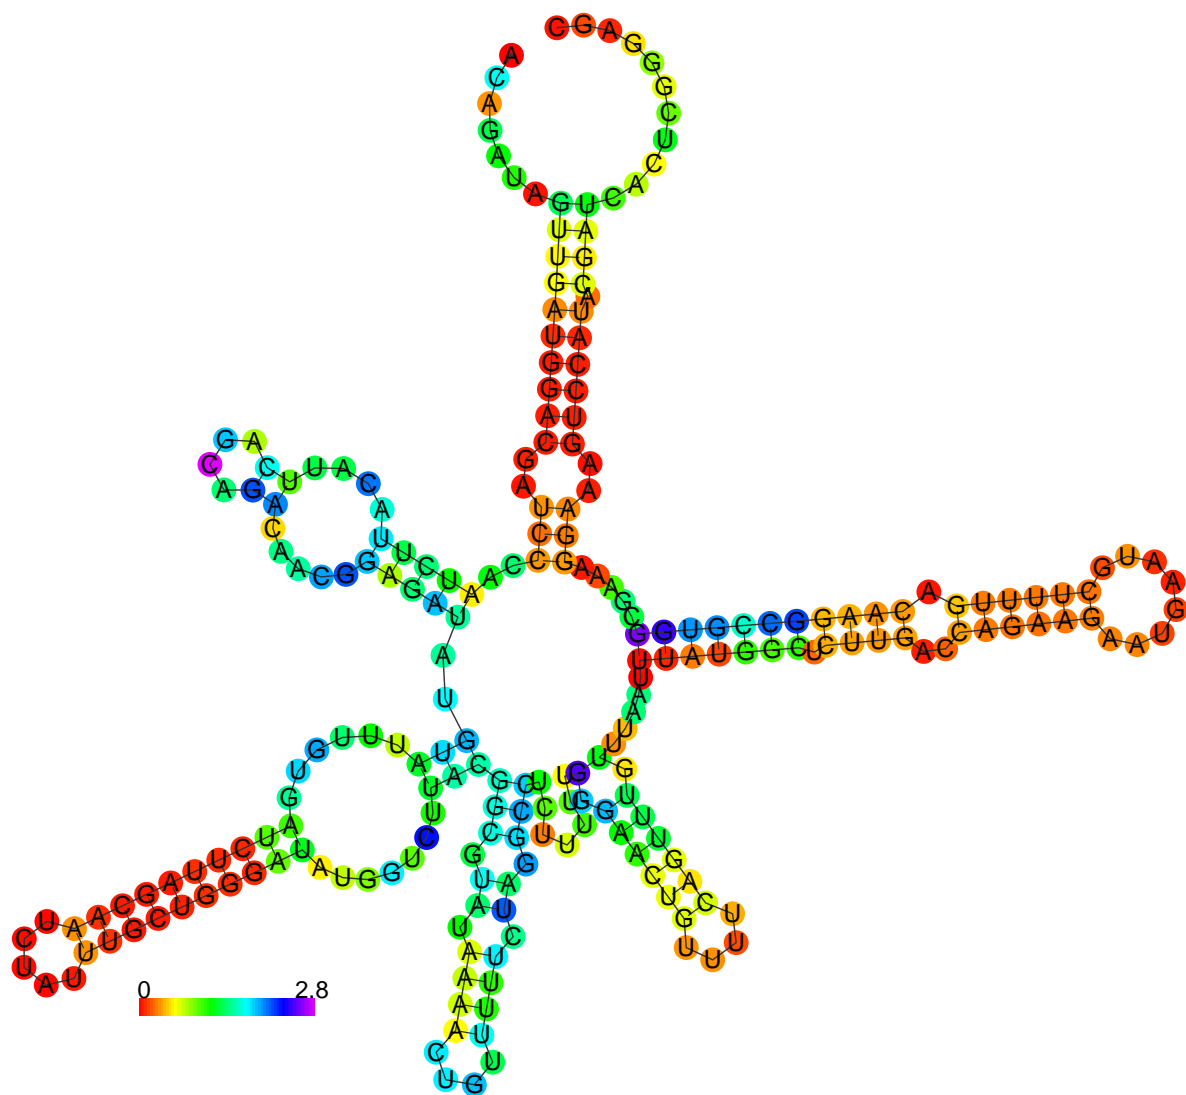

Supplement: Supplementary file 337 [file supplementary]

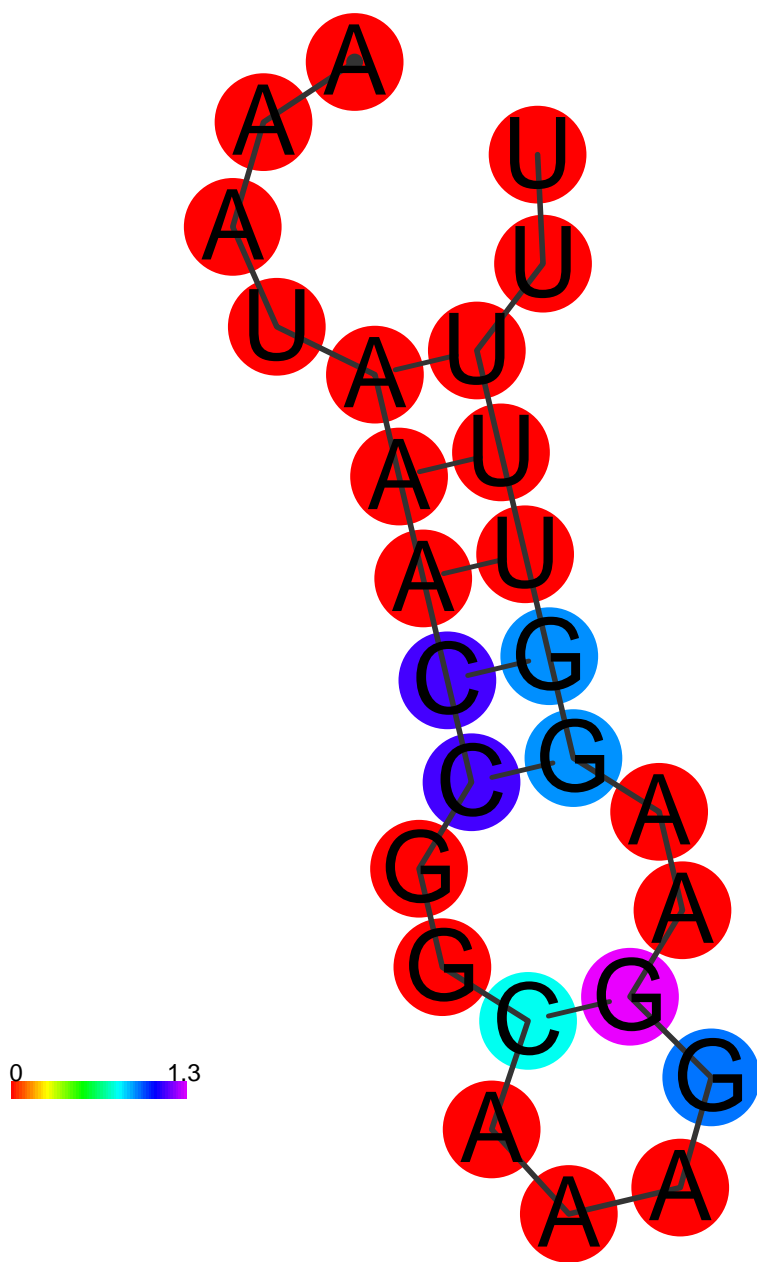

Supplement: Supplementary file 338 [file supplementary]

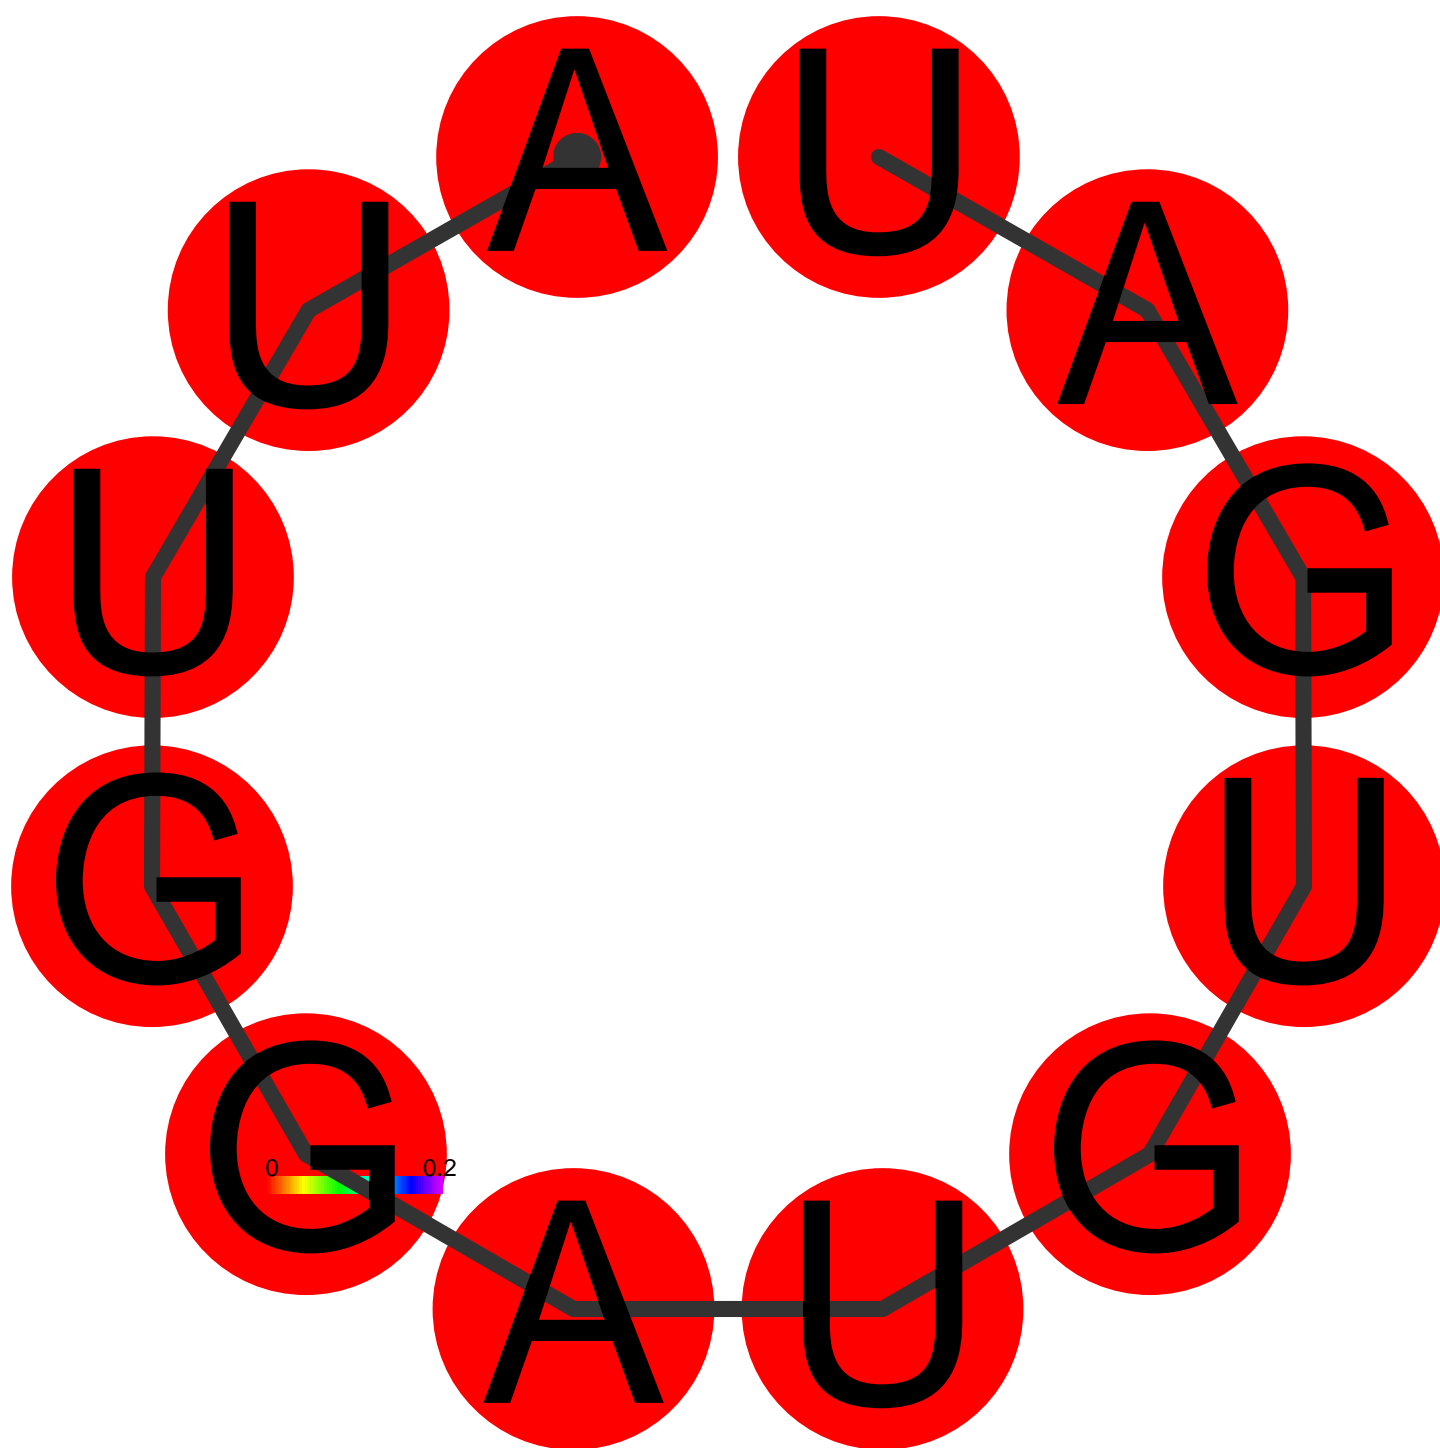

Supplement: Supplementary file 339 [file supplementary]

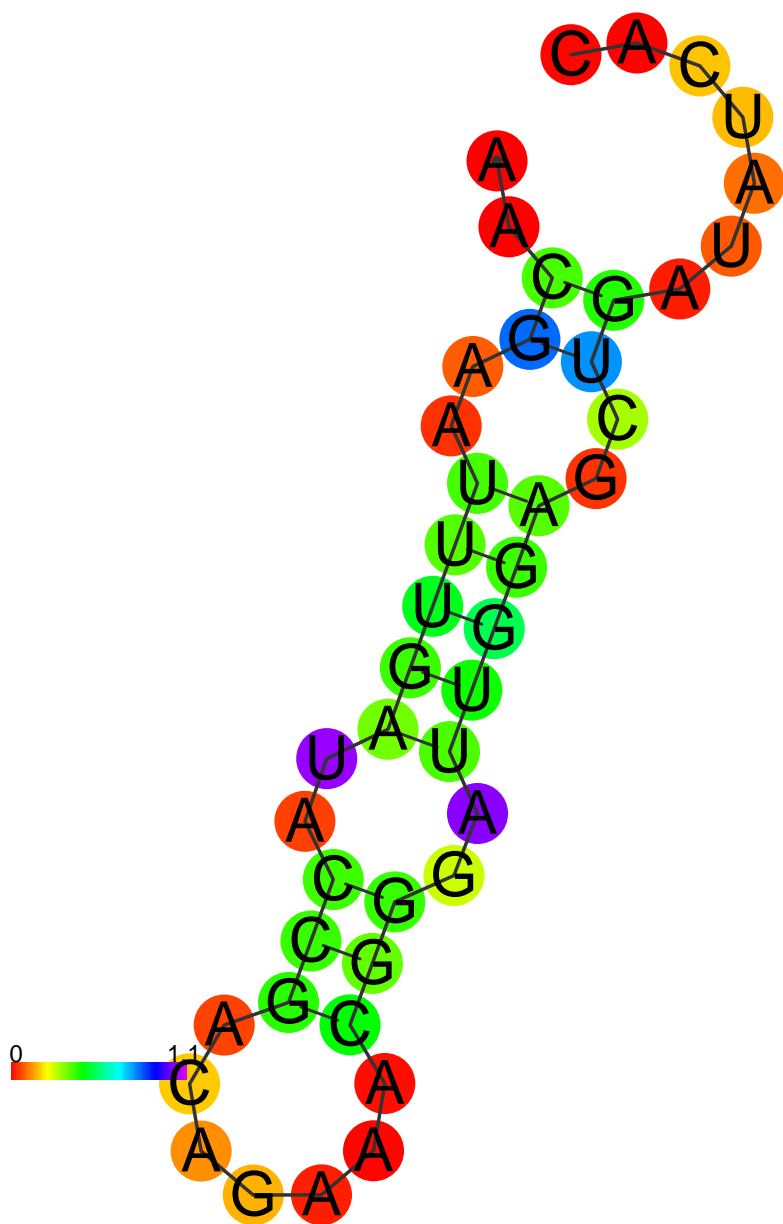

Supplement: Supplementary file 340 [file supplementary]

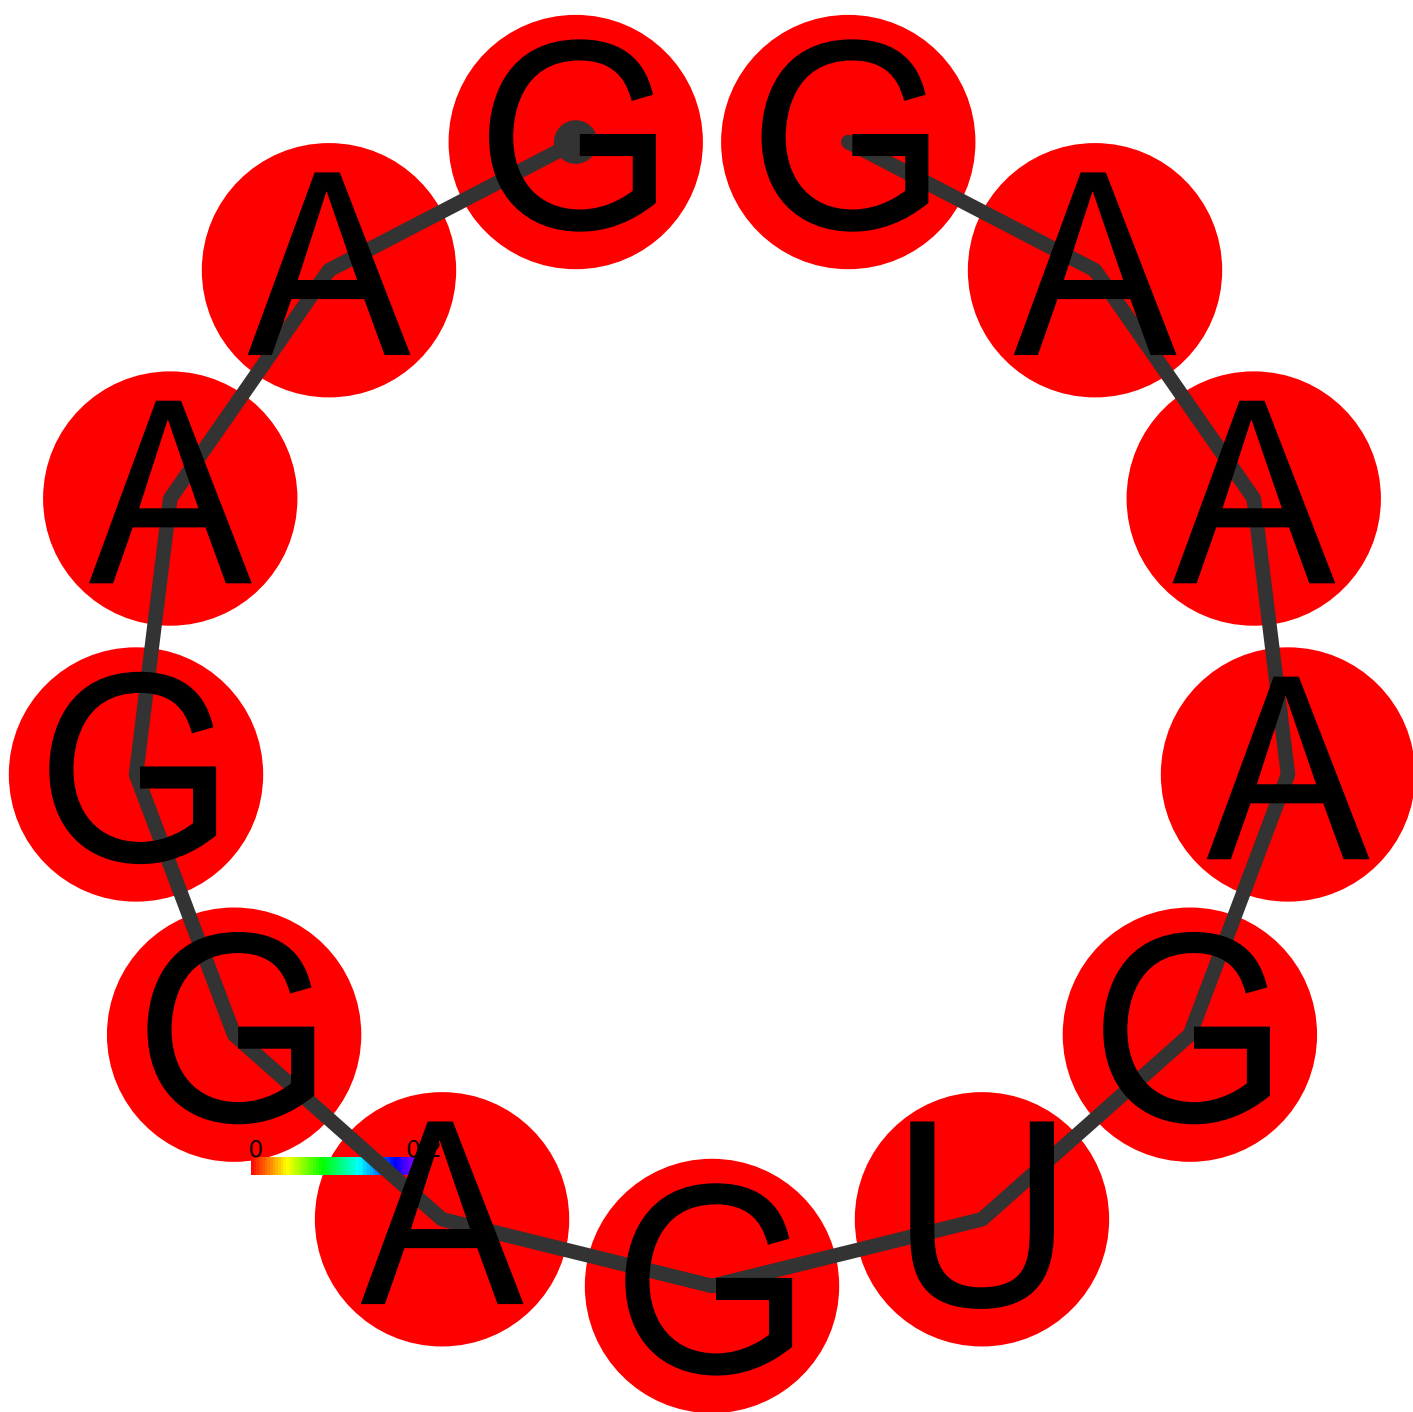

Supplement: Supplementary file 341 [file supplementary]

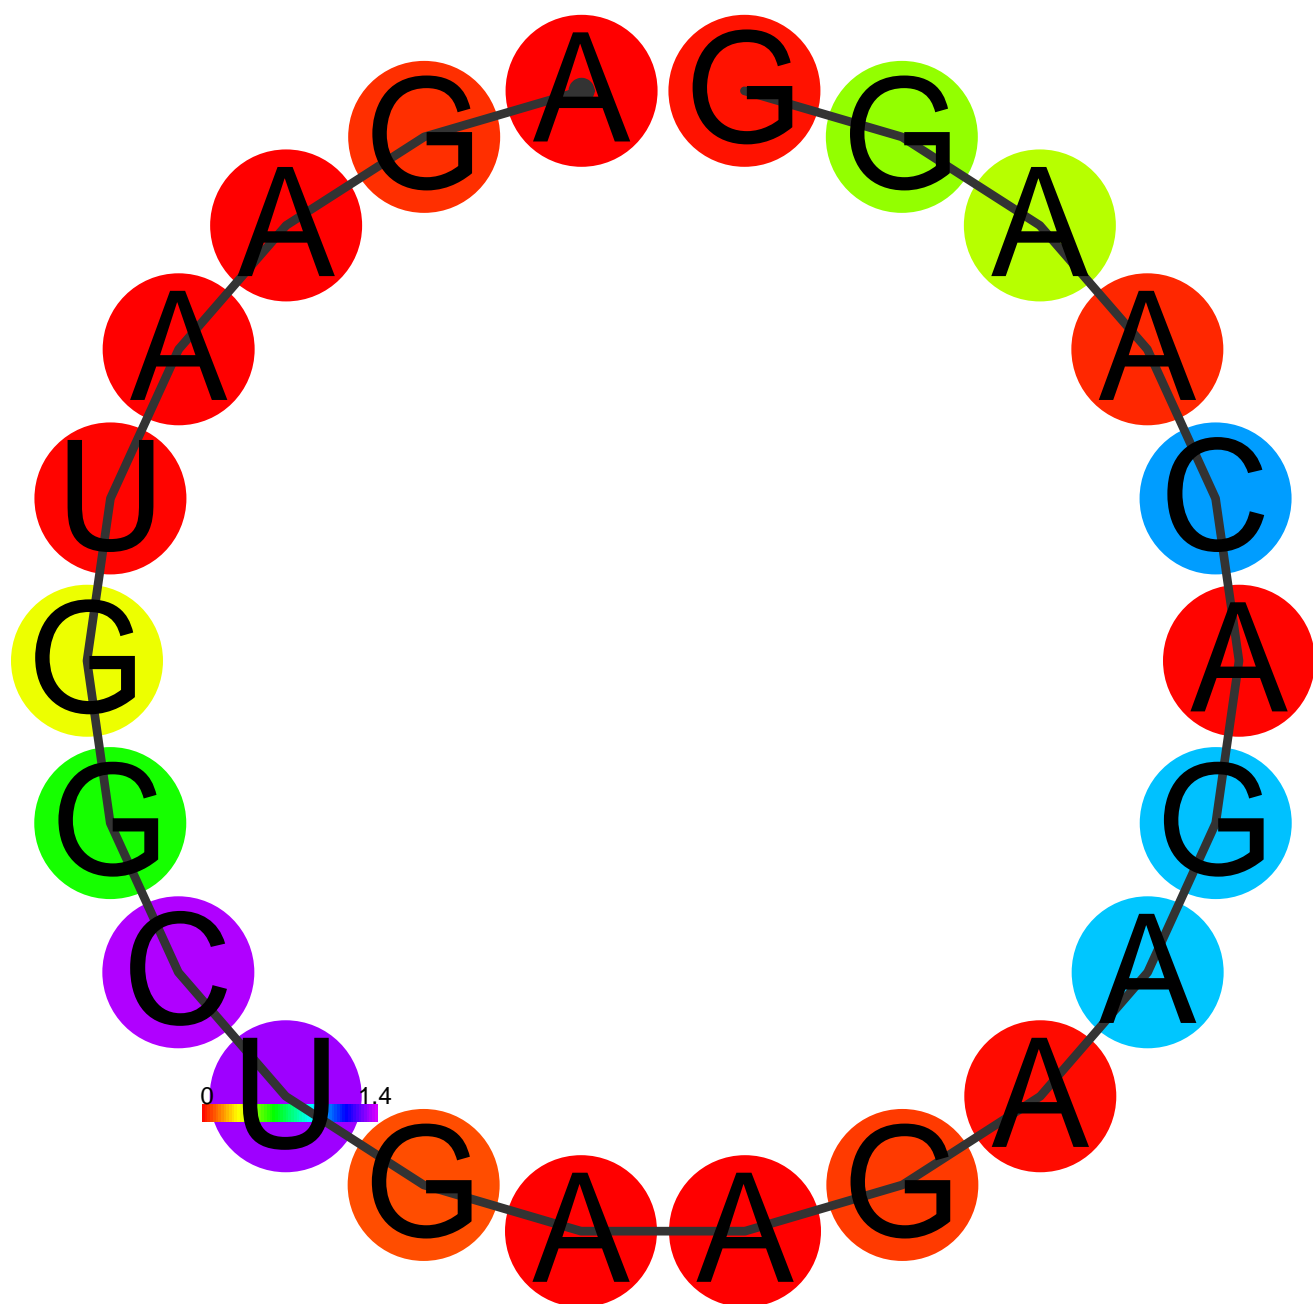

Supplement: Supplementary file 342 [file supplementary]

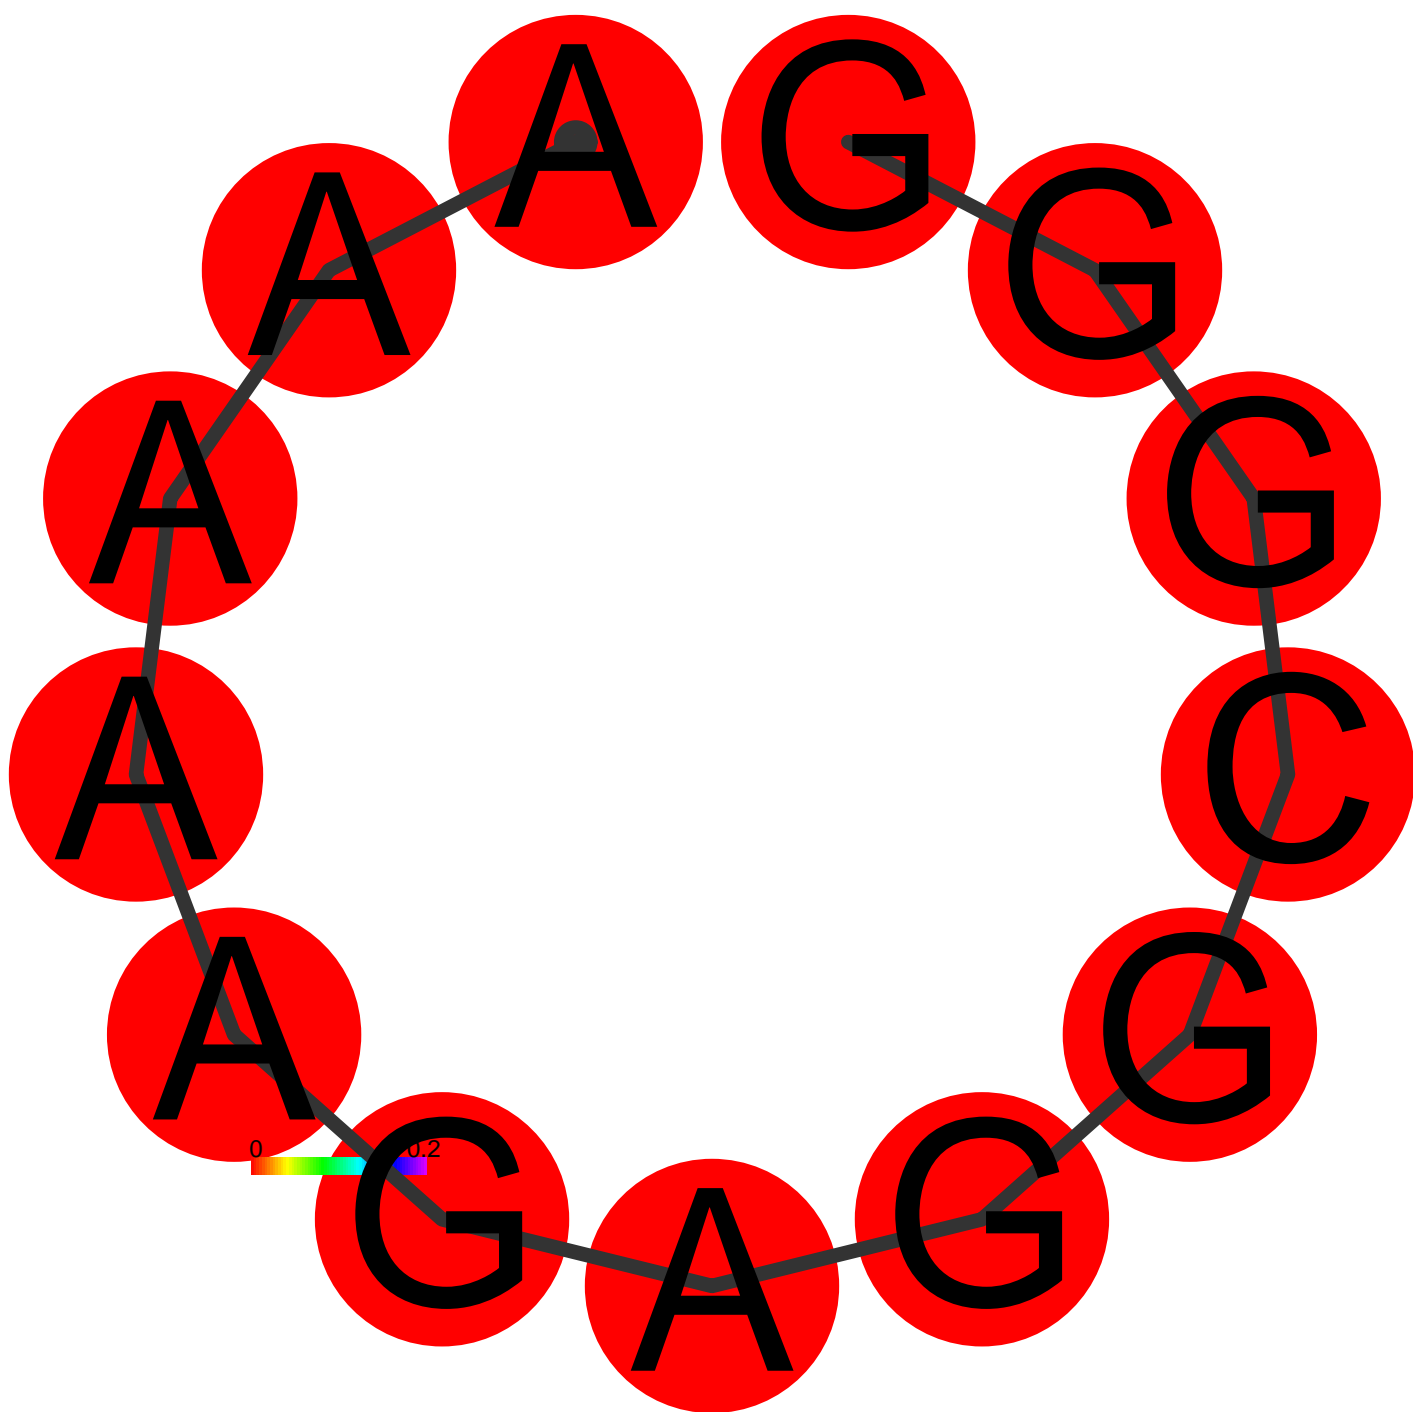

Supplement: Supplementary file 343 [file supplementary]

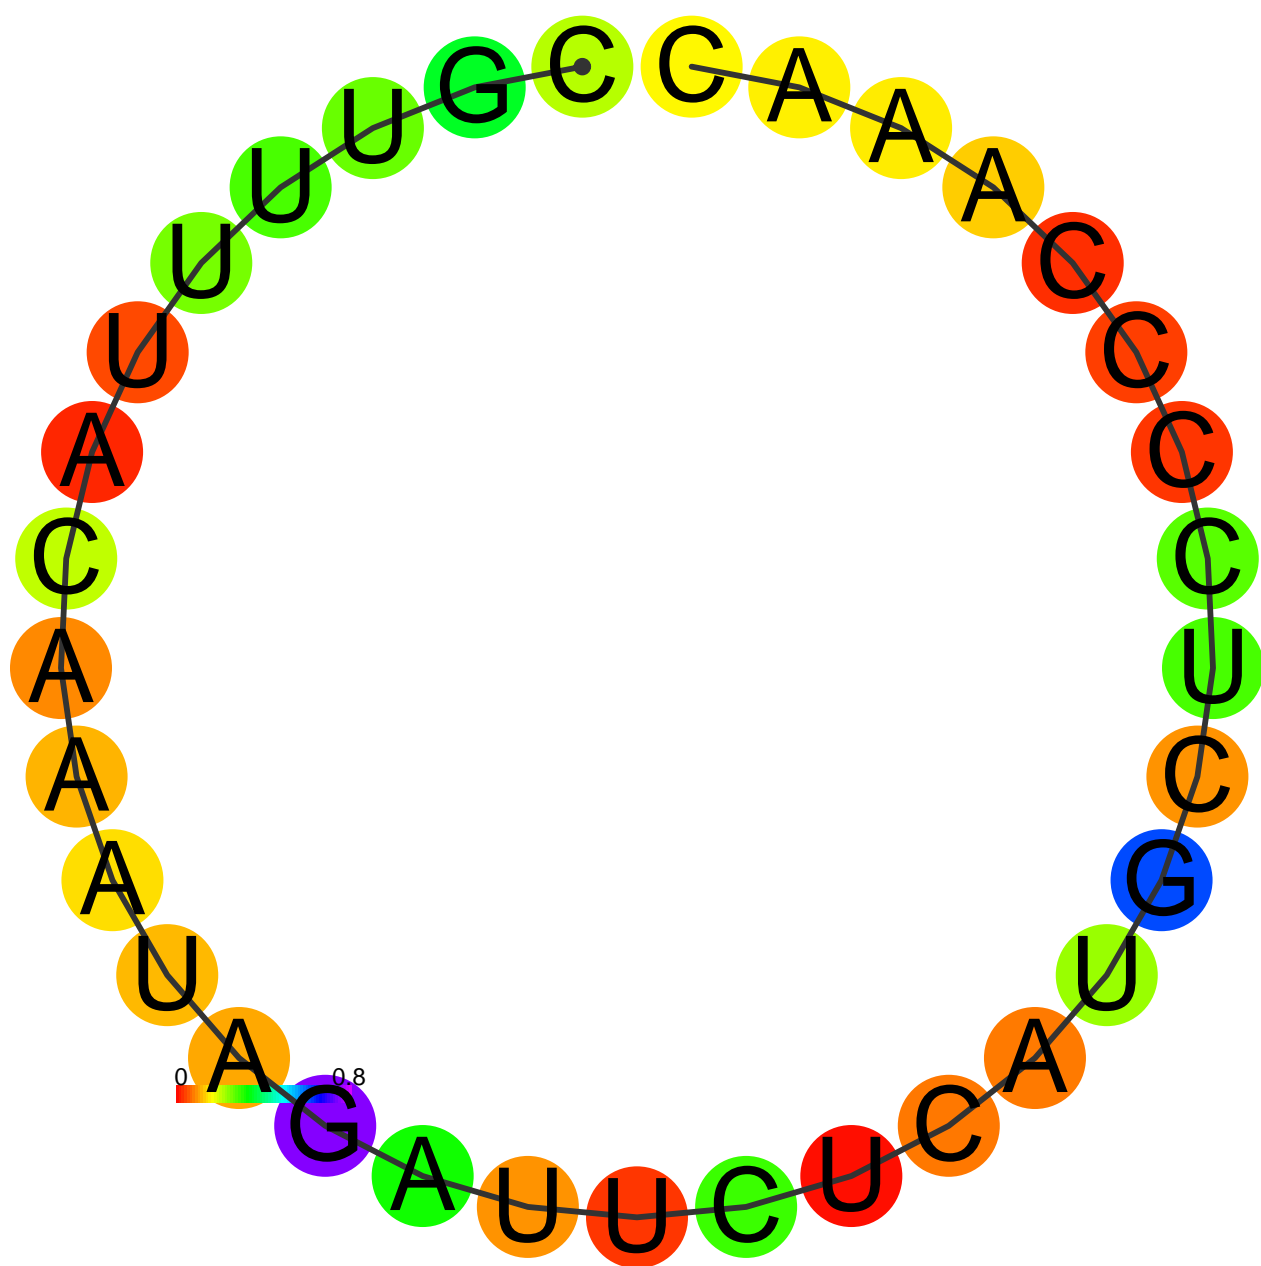

Supplement: Supplementary file 344 [file supplementary]

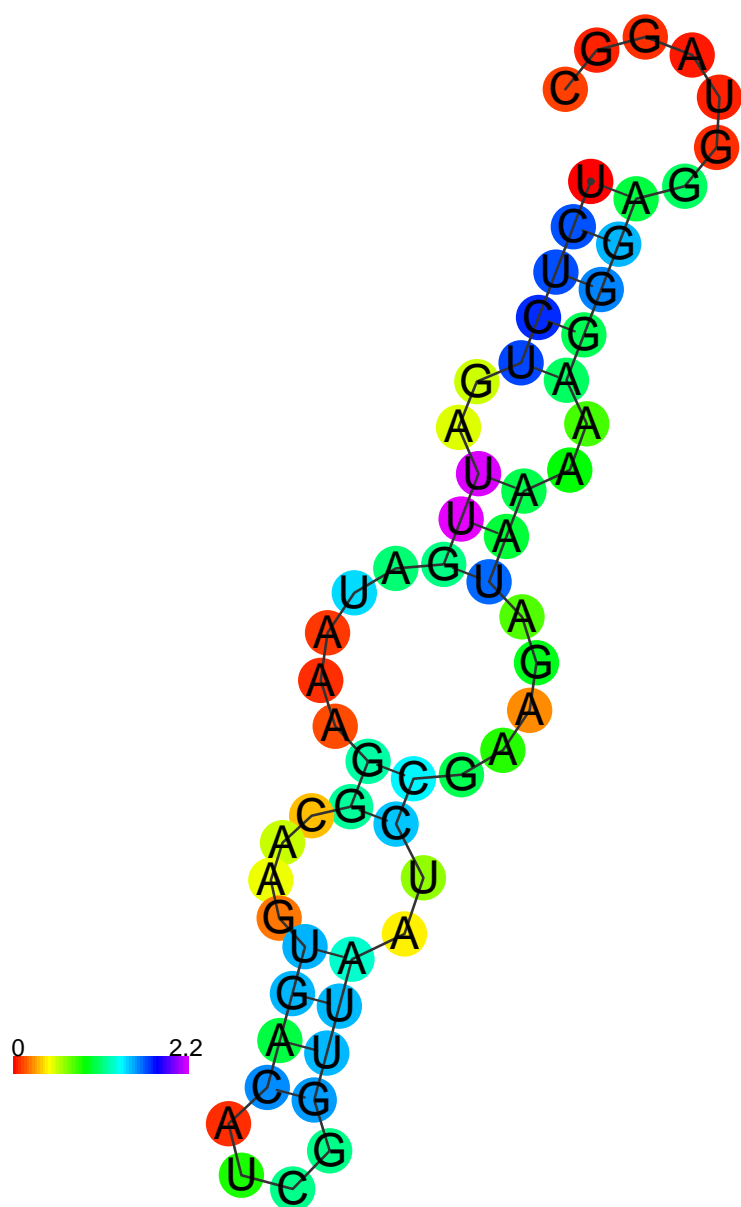

Supplement: Supplementary file 345 [file supplementary]

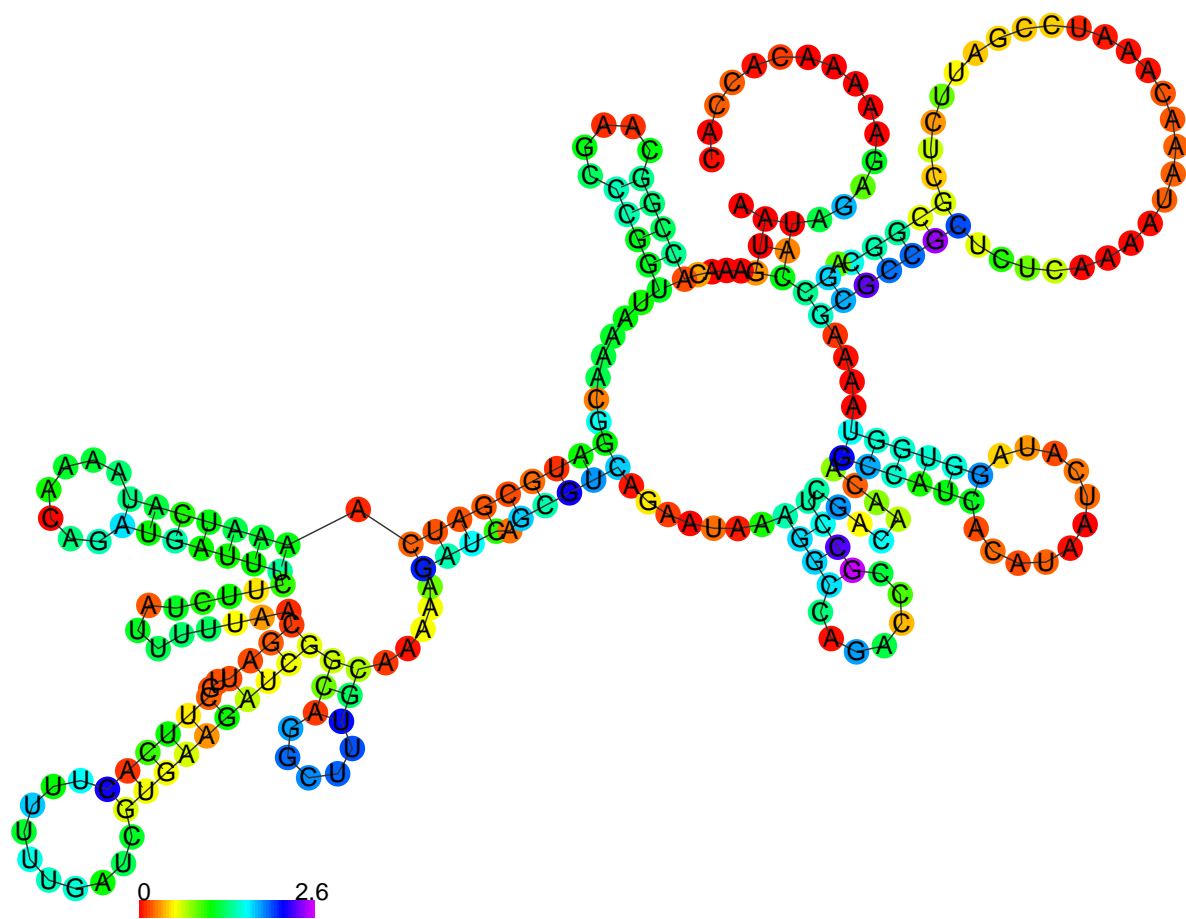

Supplement: Supplementary file 346 [file supplementary]

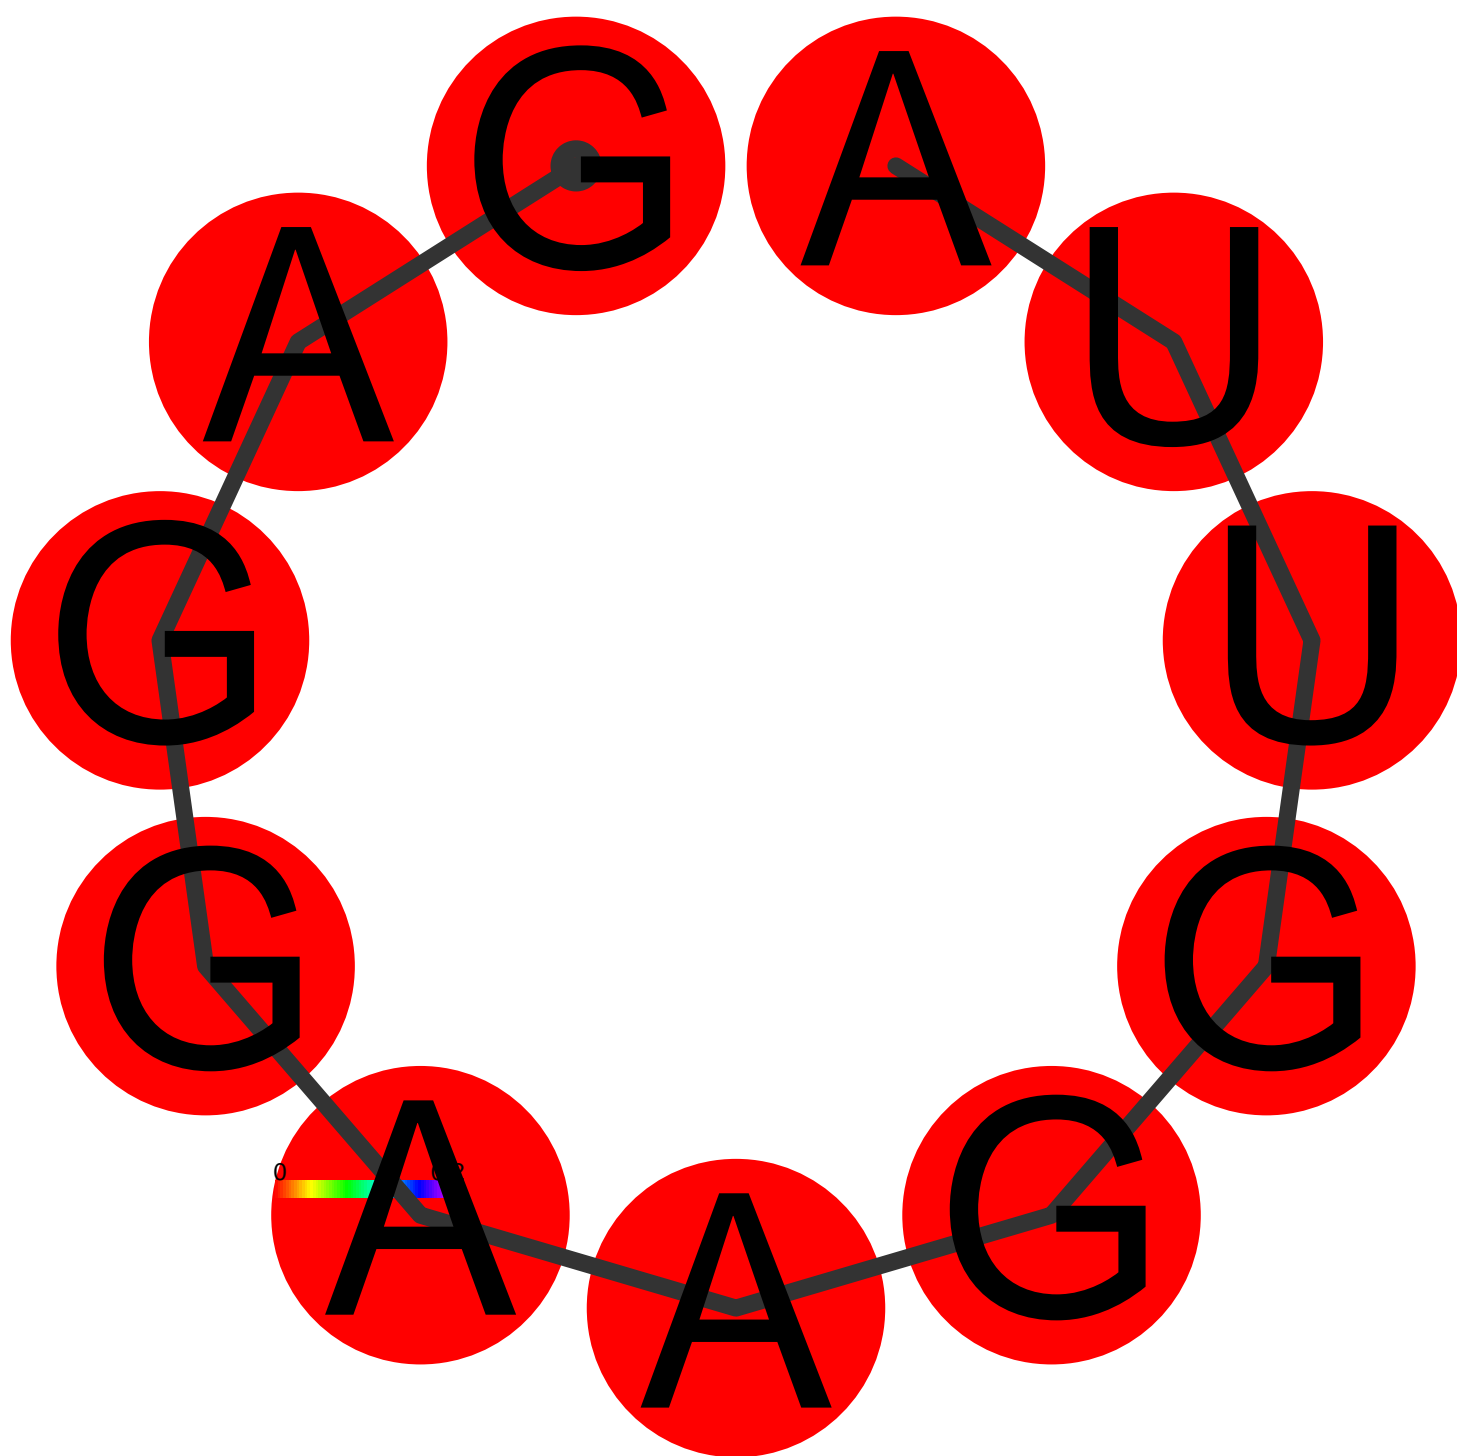

Supplement: Supplementary file 347 [file supplementary]

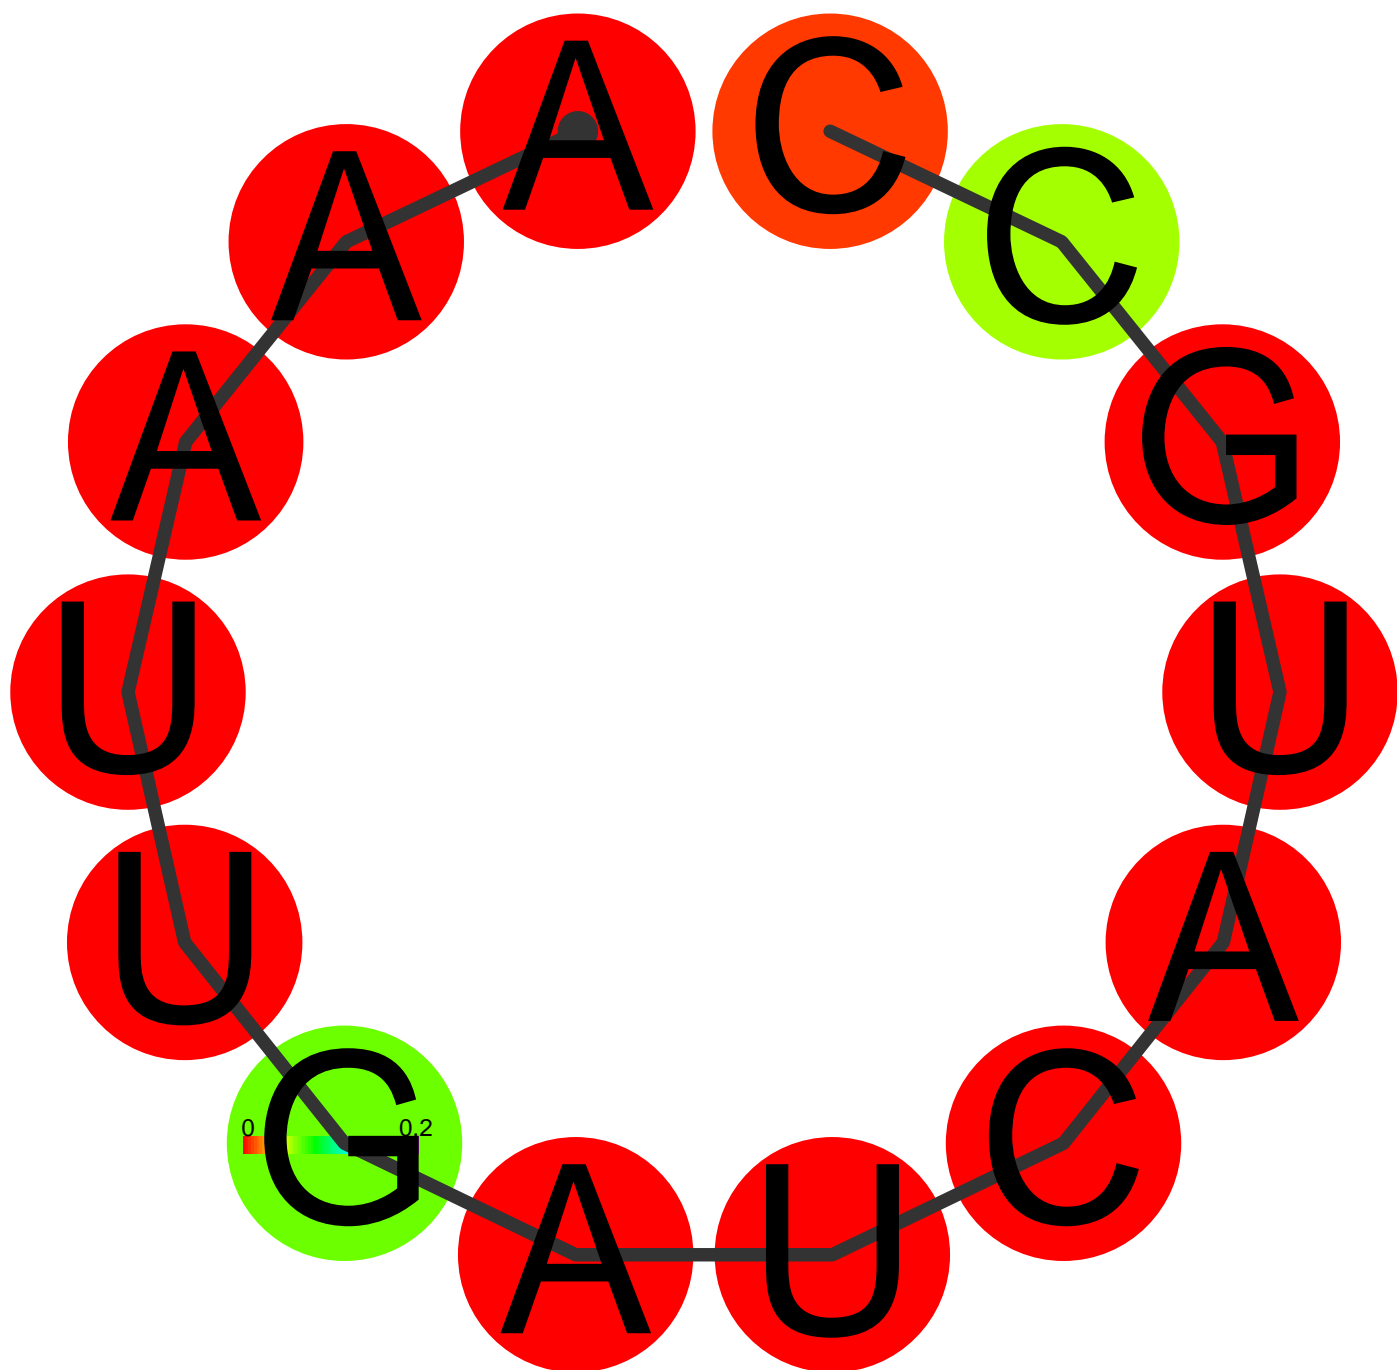

Supplement: Supplementary file 348 [file supplementary]

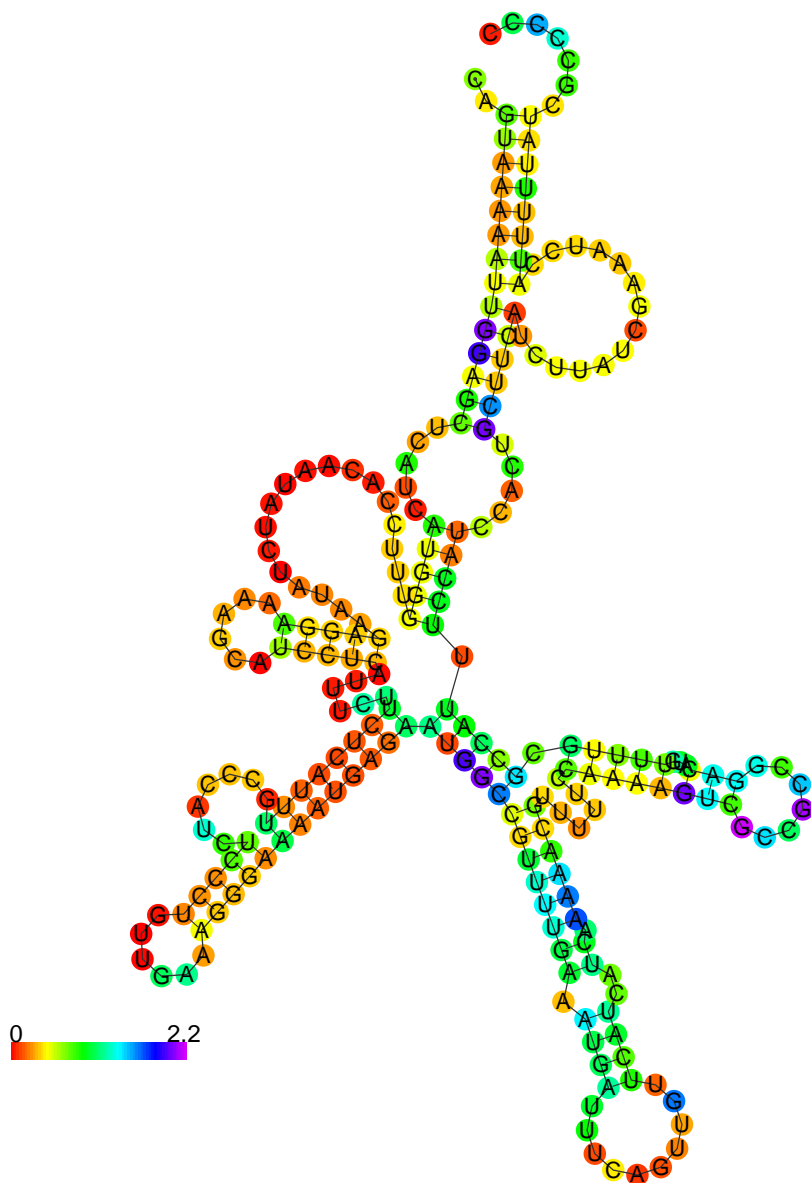

Supplement: Supplementary file 349 [file supplementary]

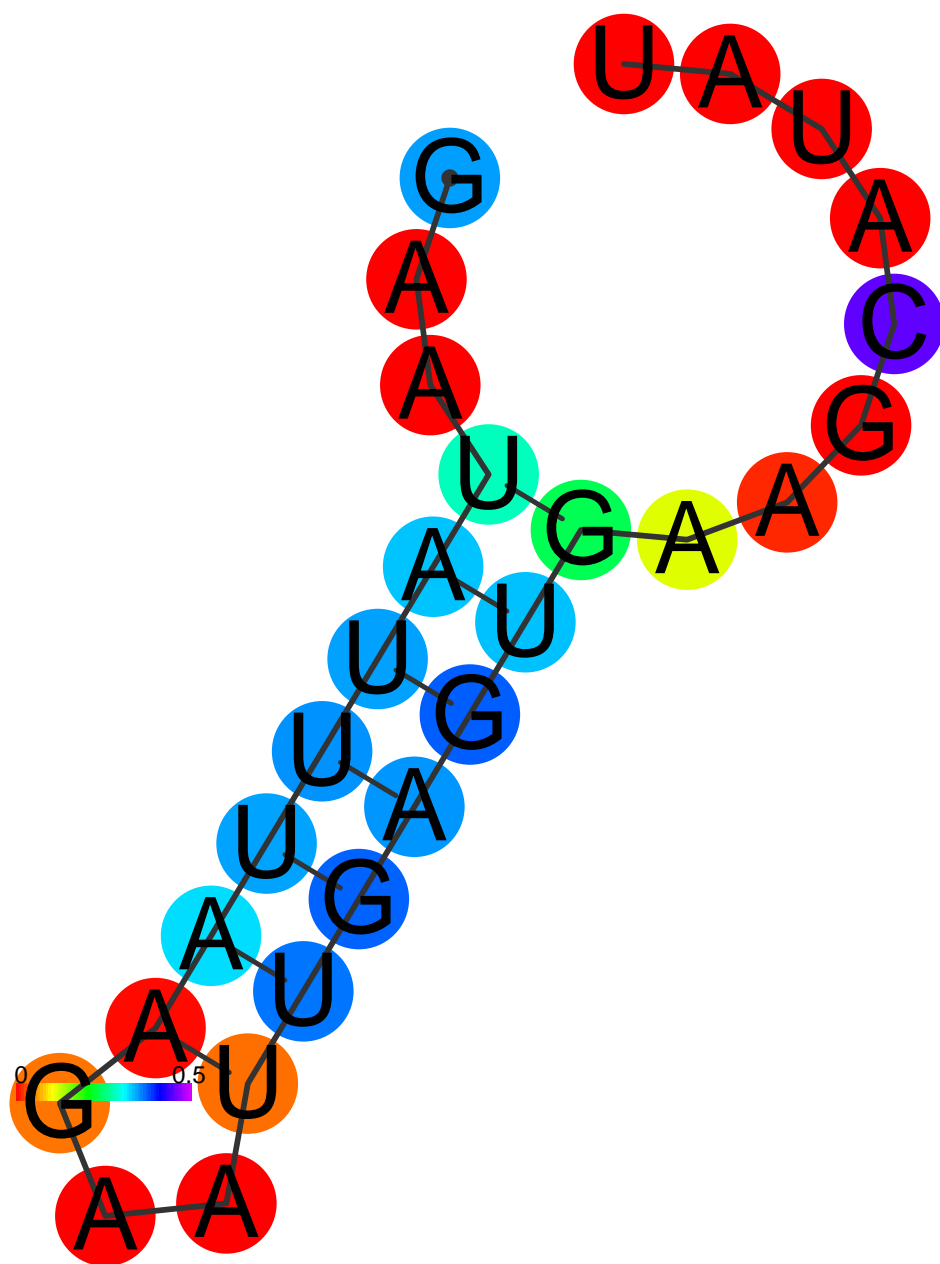

Supplement: Supplementary file 350 [file supplementary]

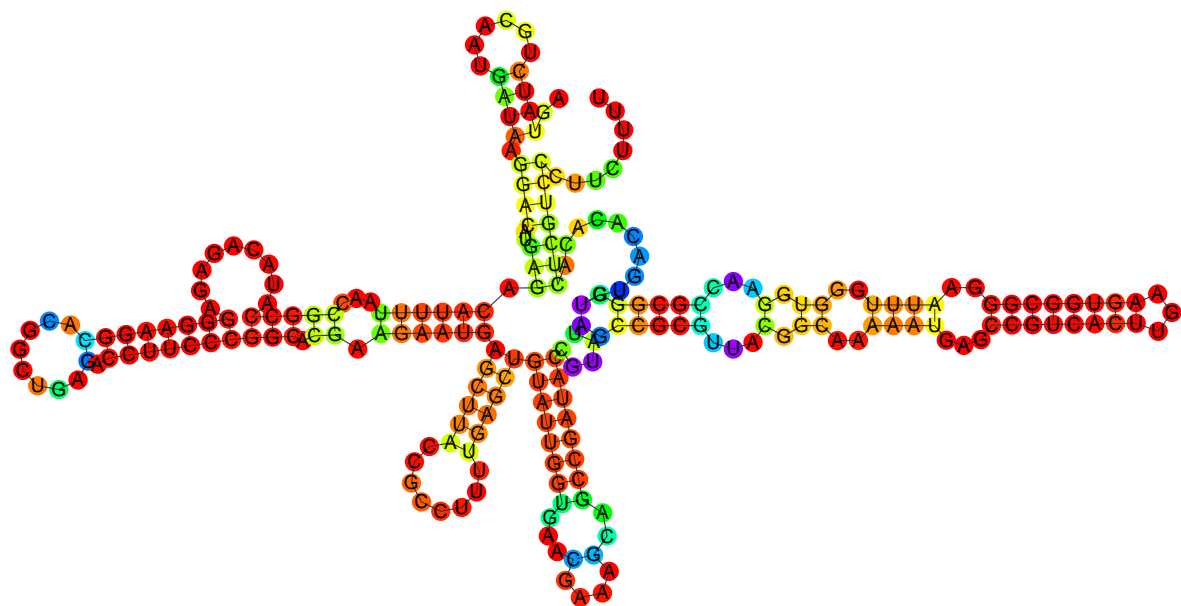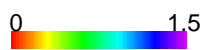

Supplement: Supplementary file 351 [file supplementary]

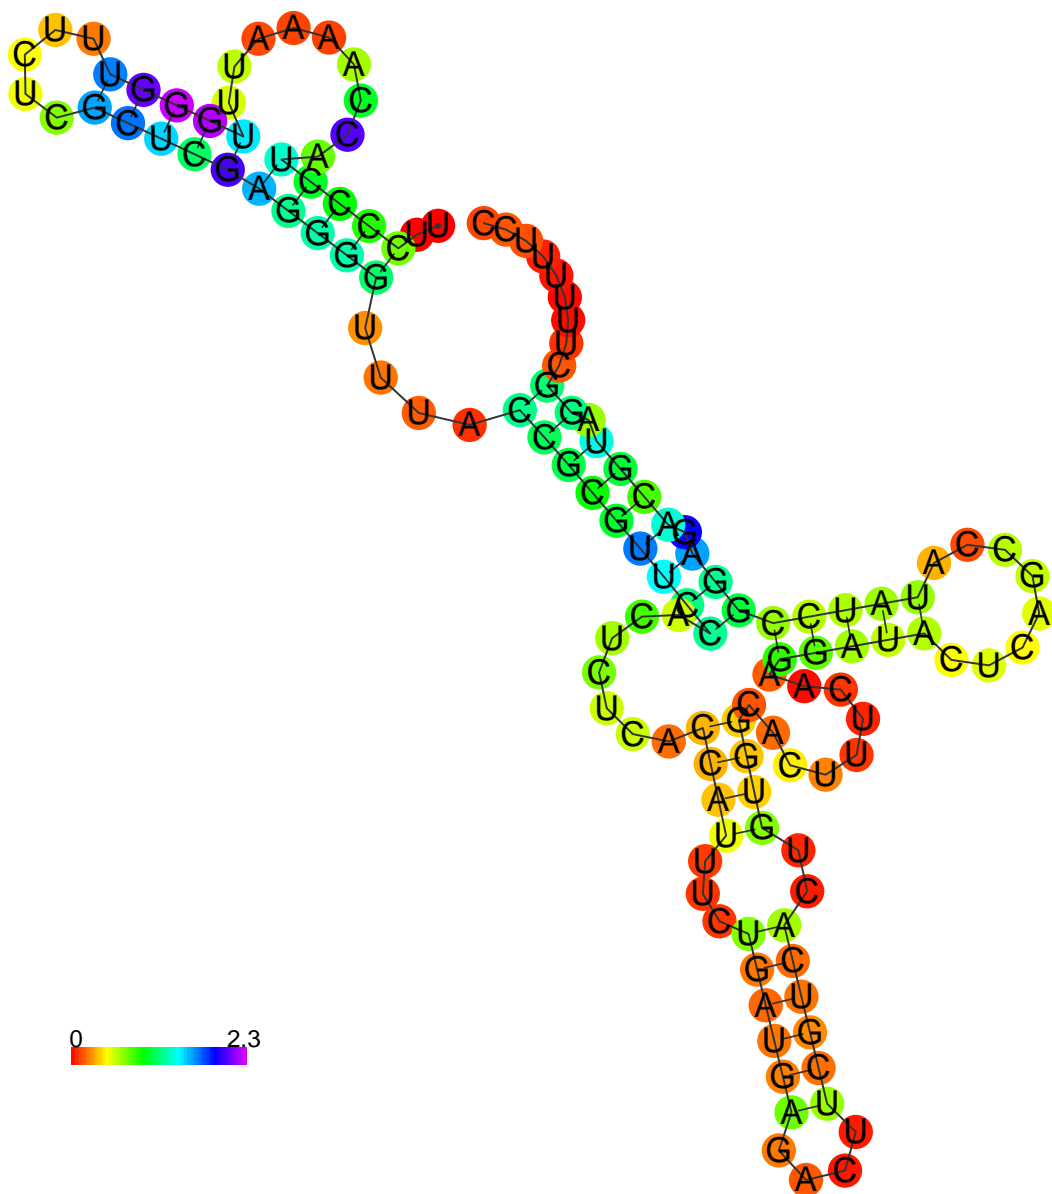

Supplement: Supplementary file 352 [file supplementary]

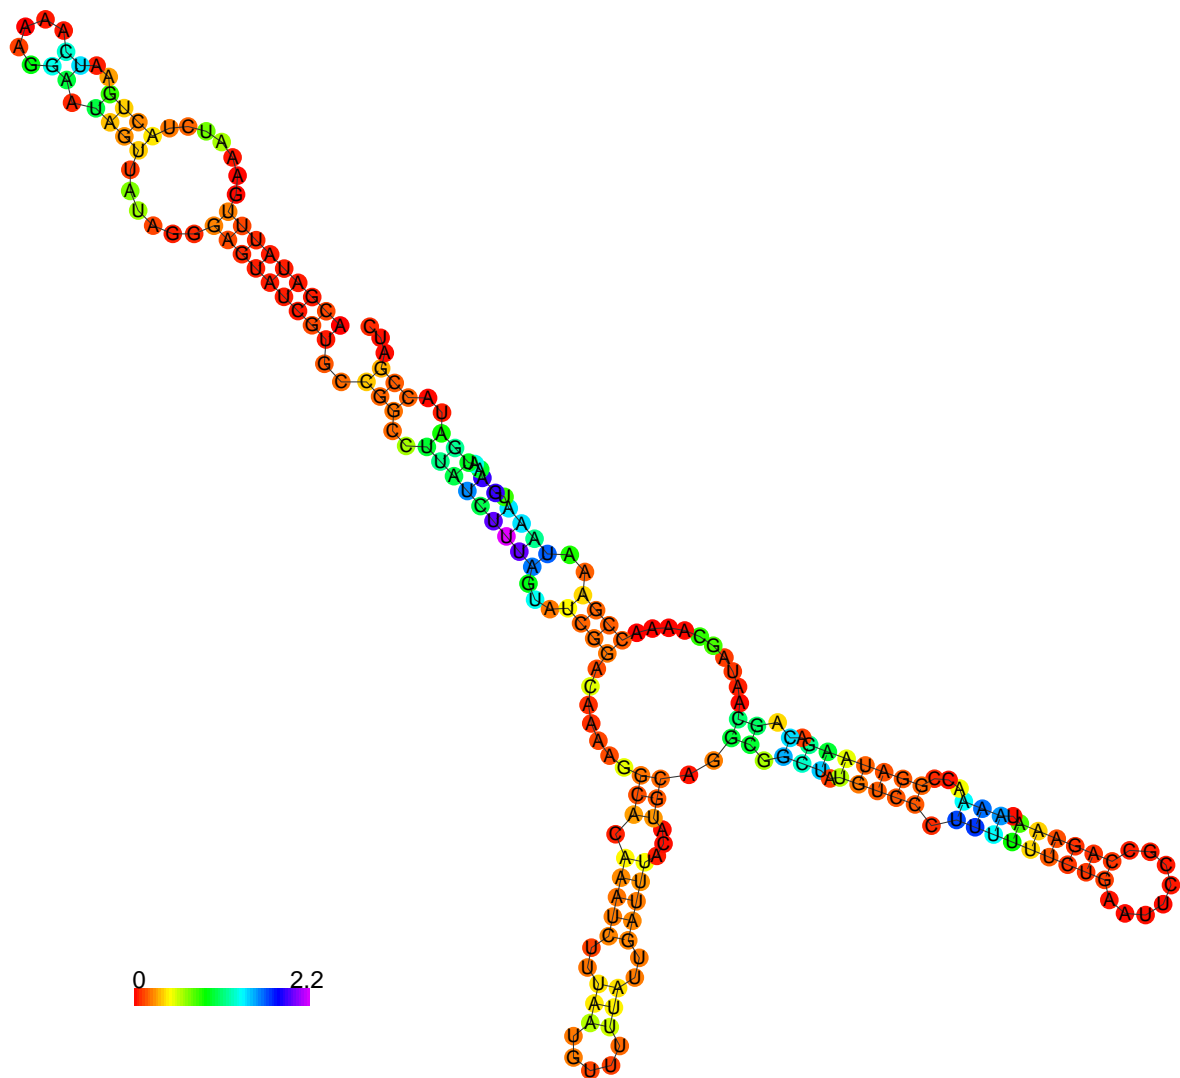

Supplement: Supplementary file 353 [file supplementary]

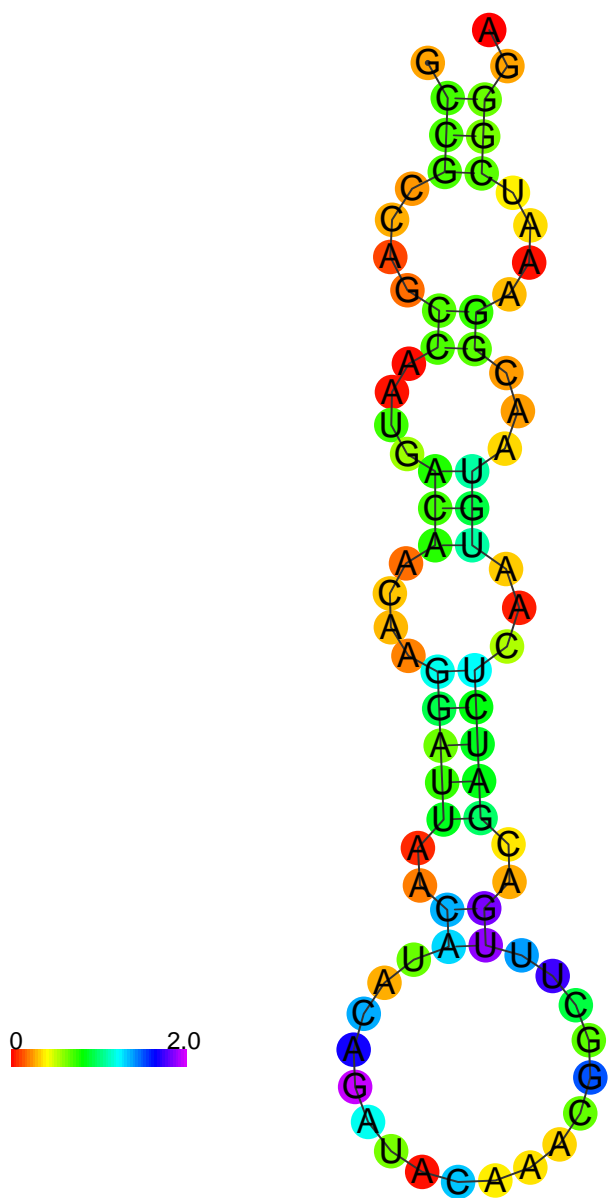

Supplement: Supplementary file 354 [file supplementary]

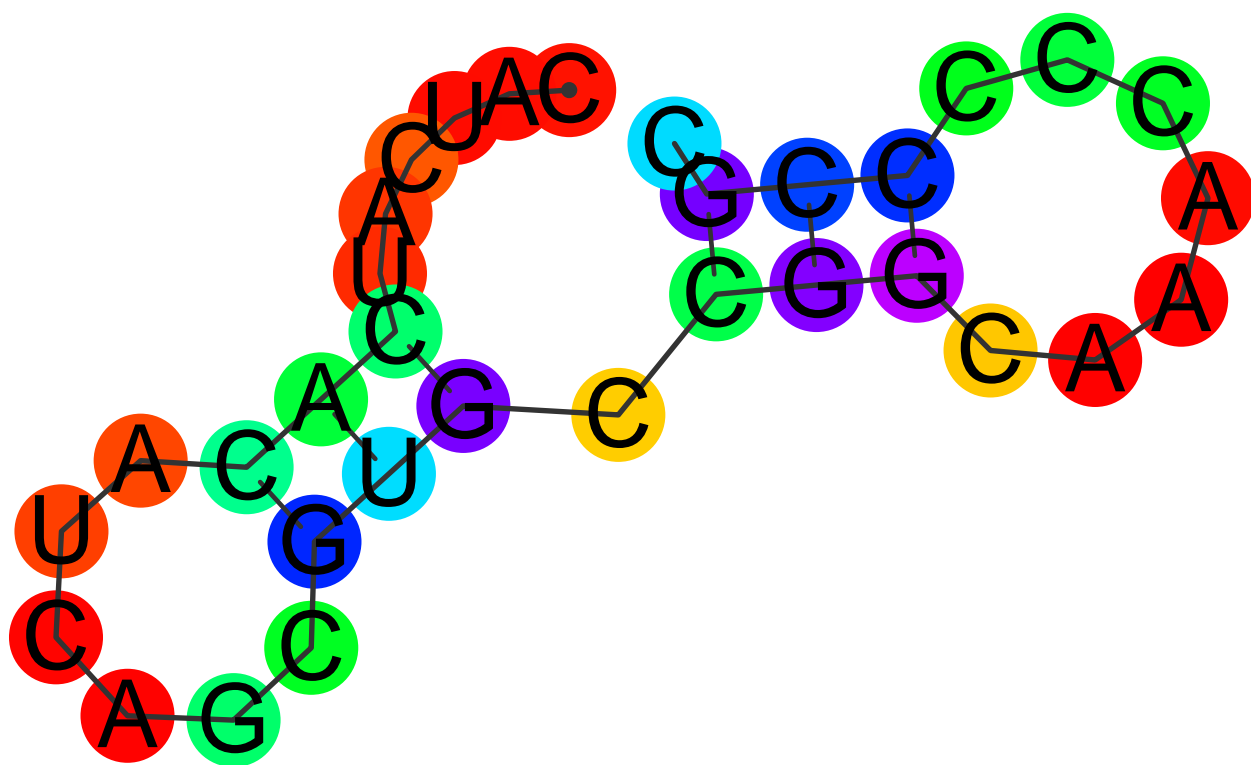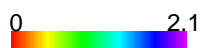

Supplement: Supplementary file 355 [file supplementary]

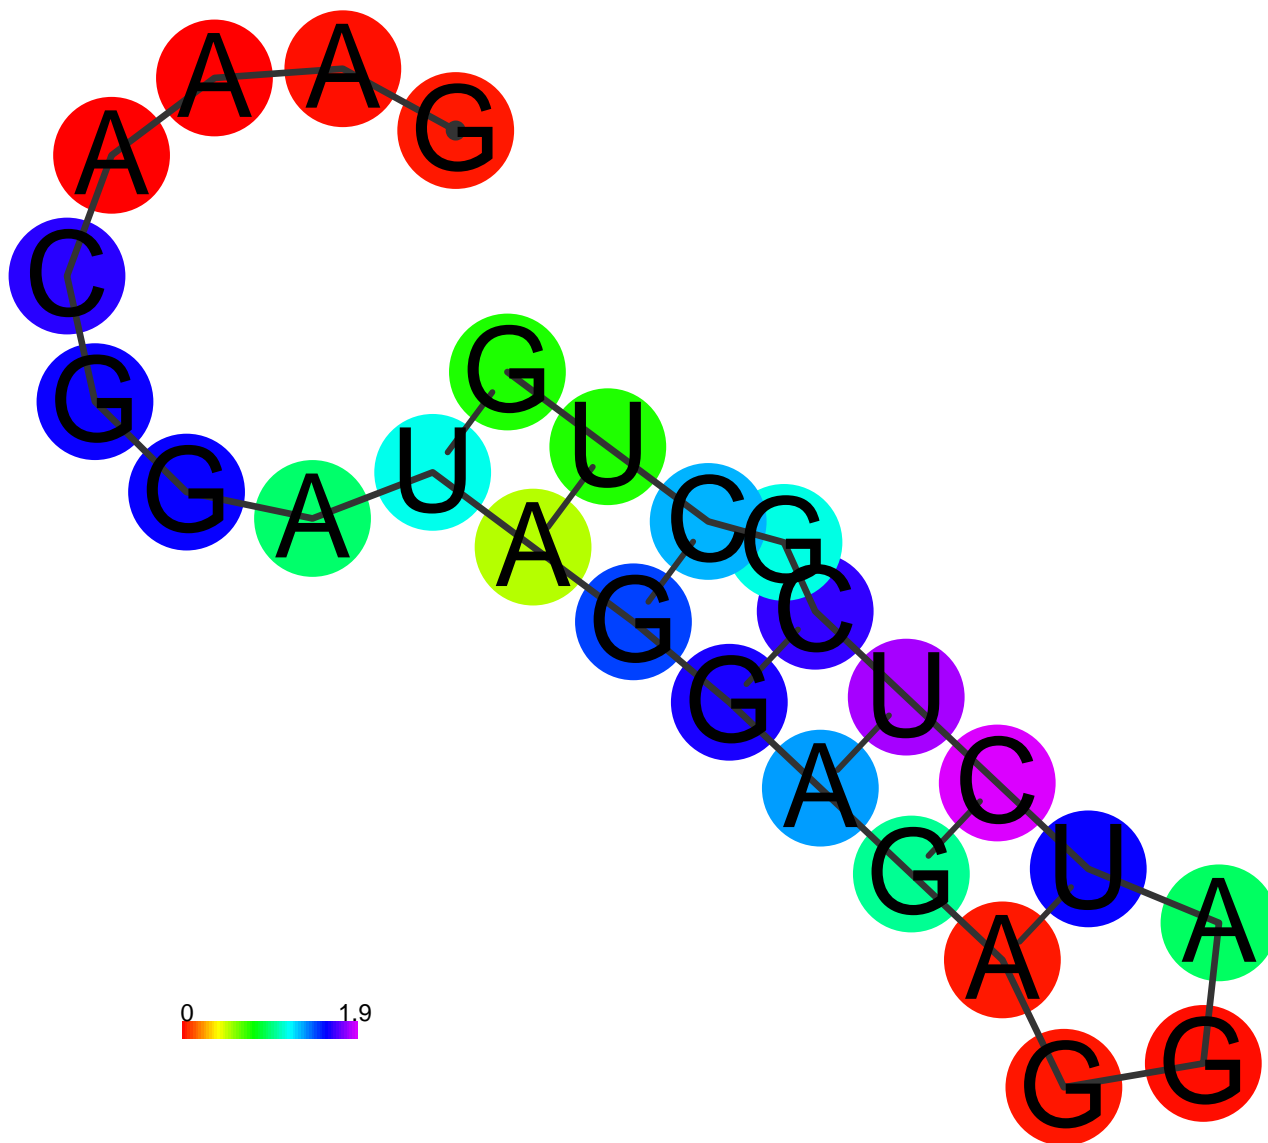

Supplement: Supplementary file 356 [file supplementary]

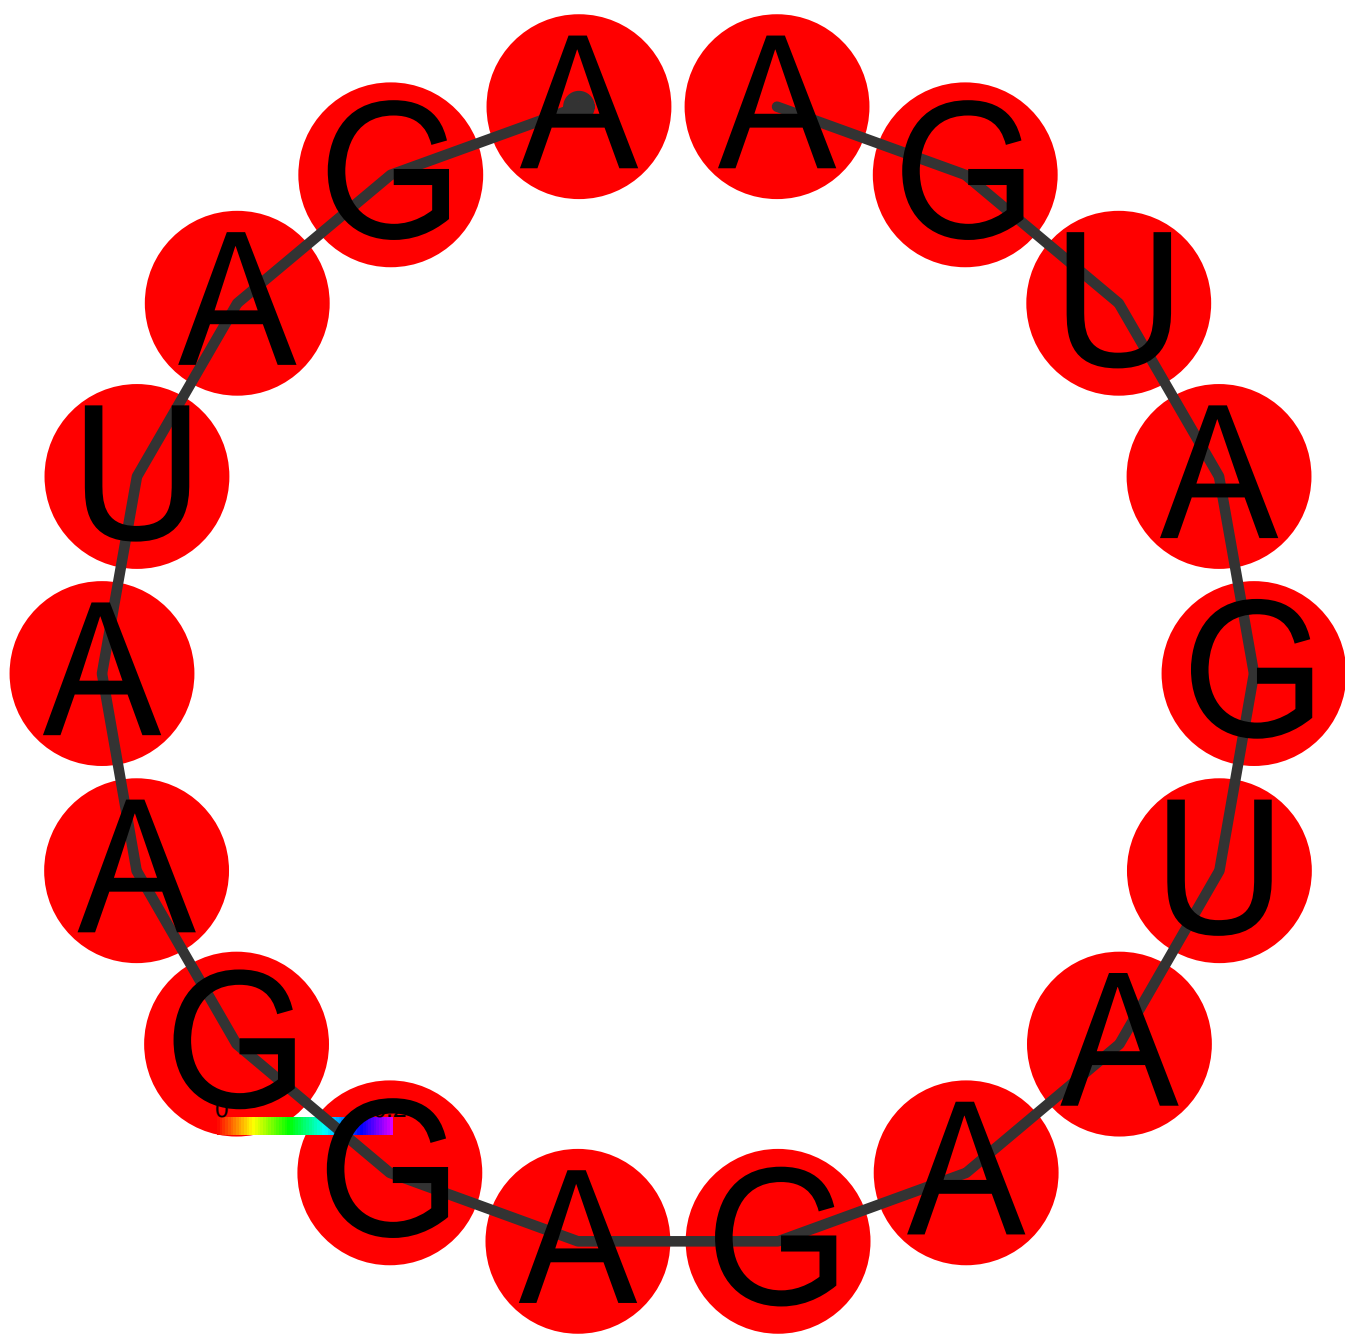

Supplement: Supplementary file 357 [file supplementary]

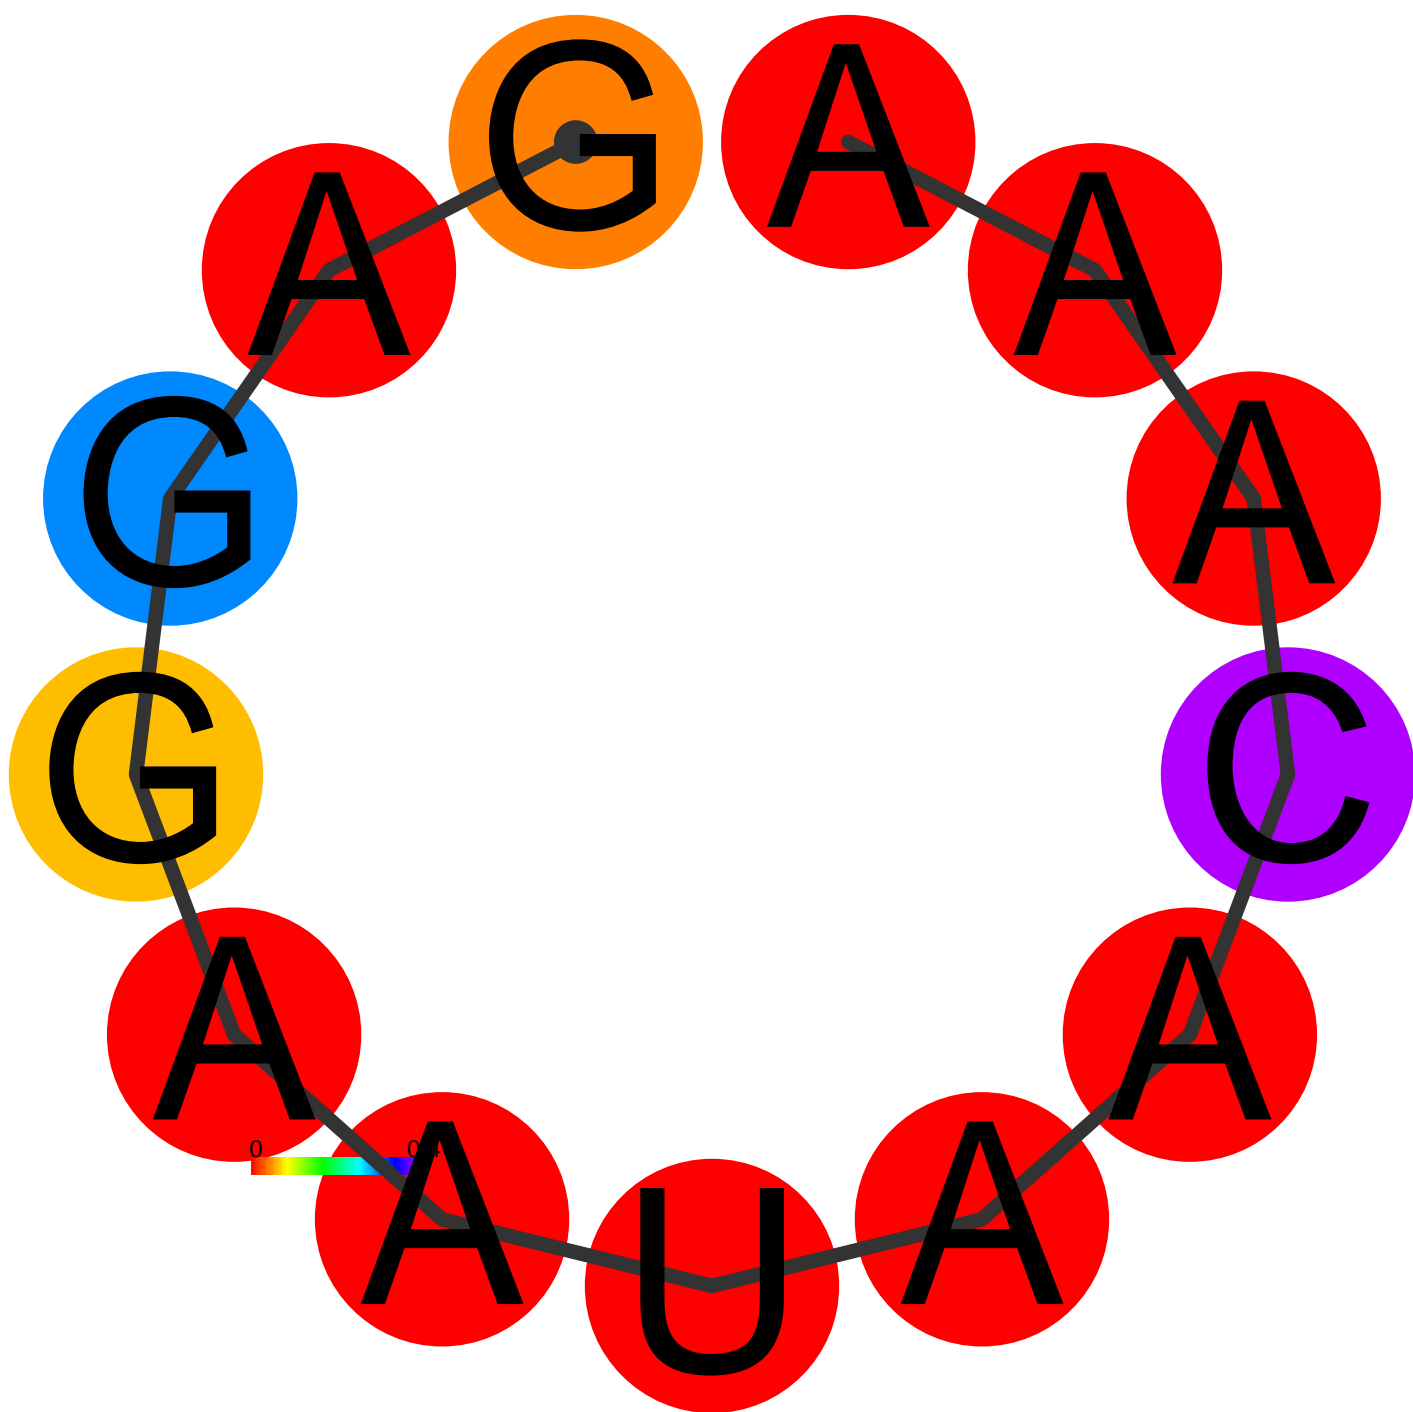

Supplement: Supplementary file 358 [file supplementary]

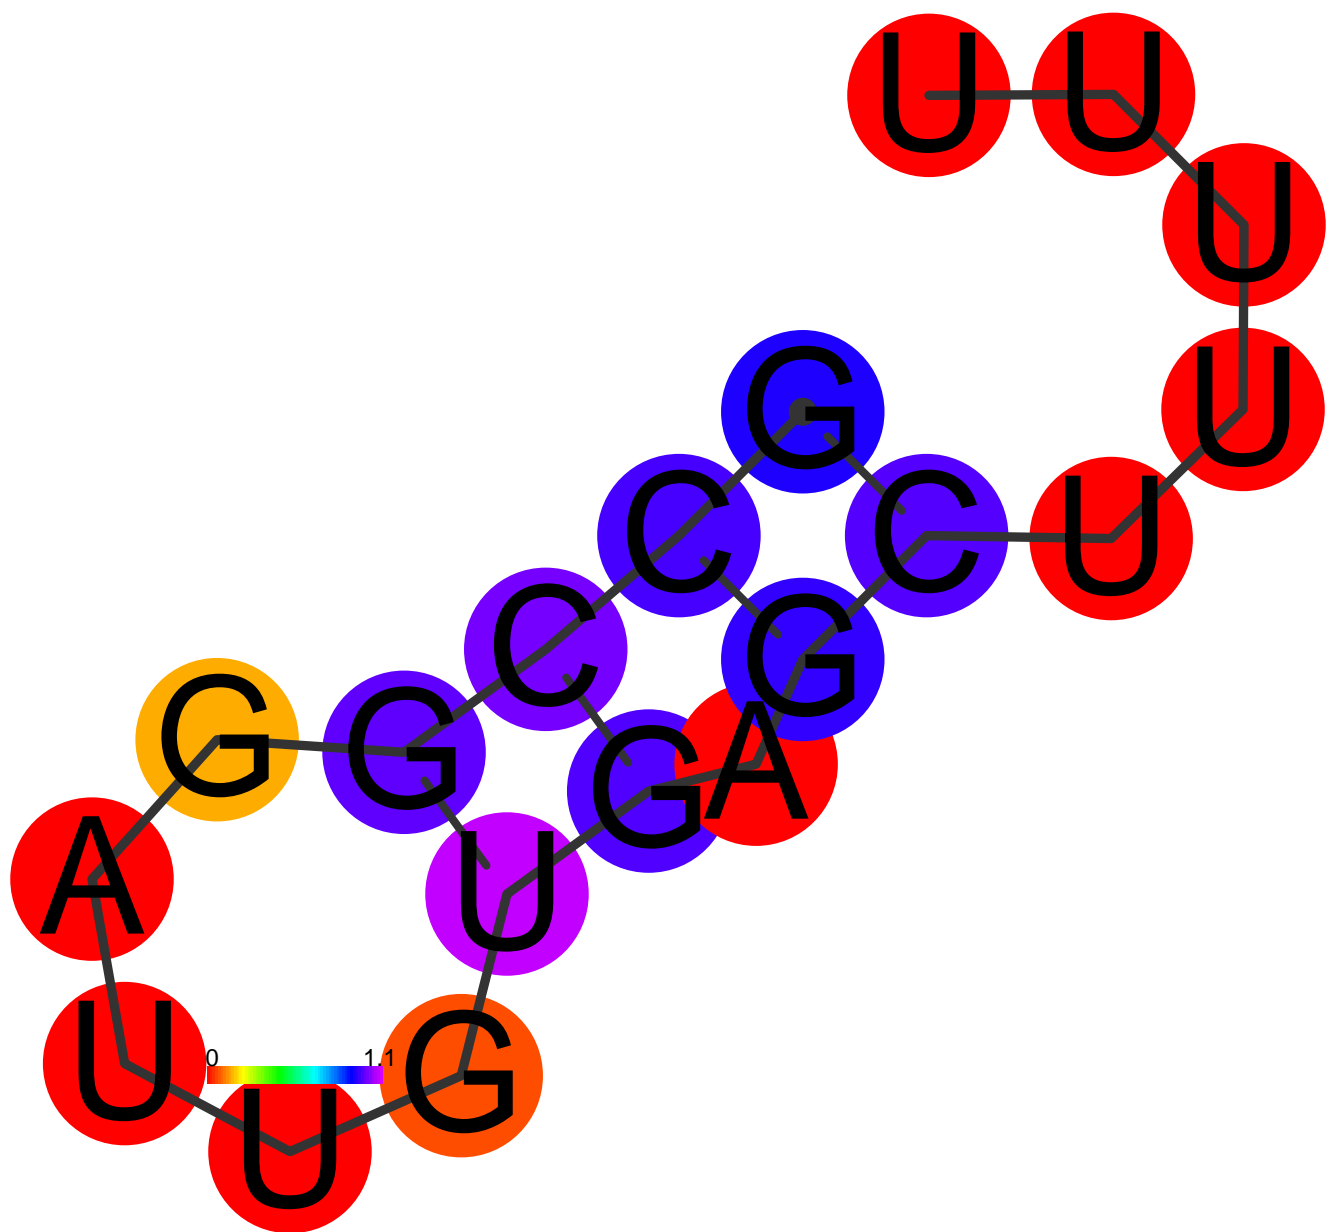

Supplement: Supplementary file 359 [file supplementary]

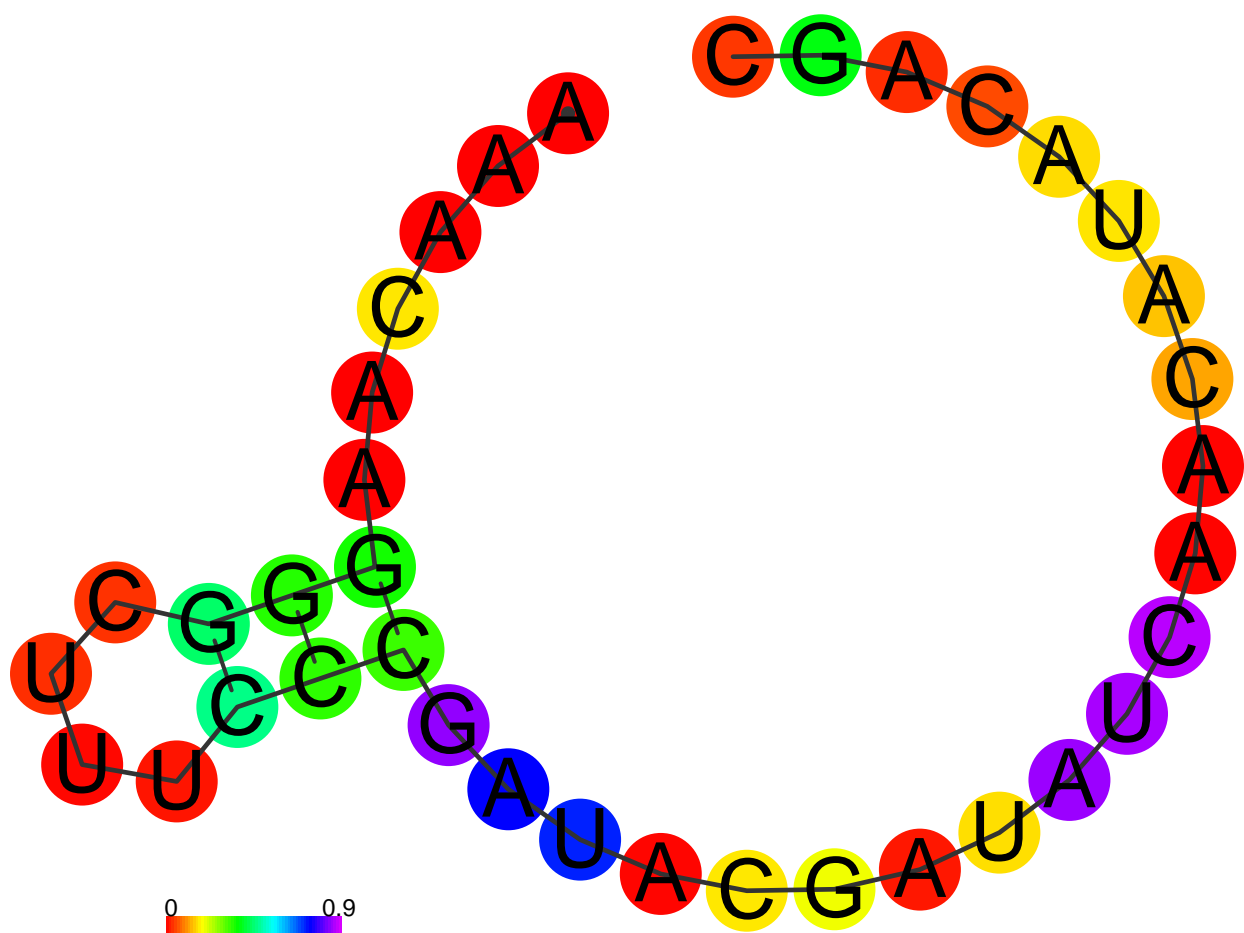

Supplement: Supplementary file 360 [file supplementary]

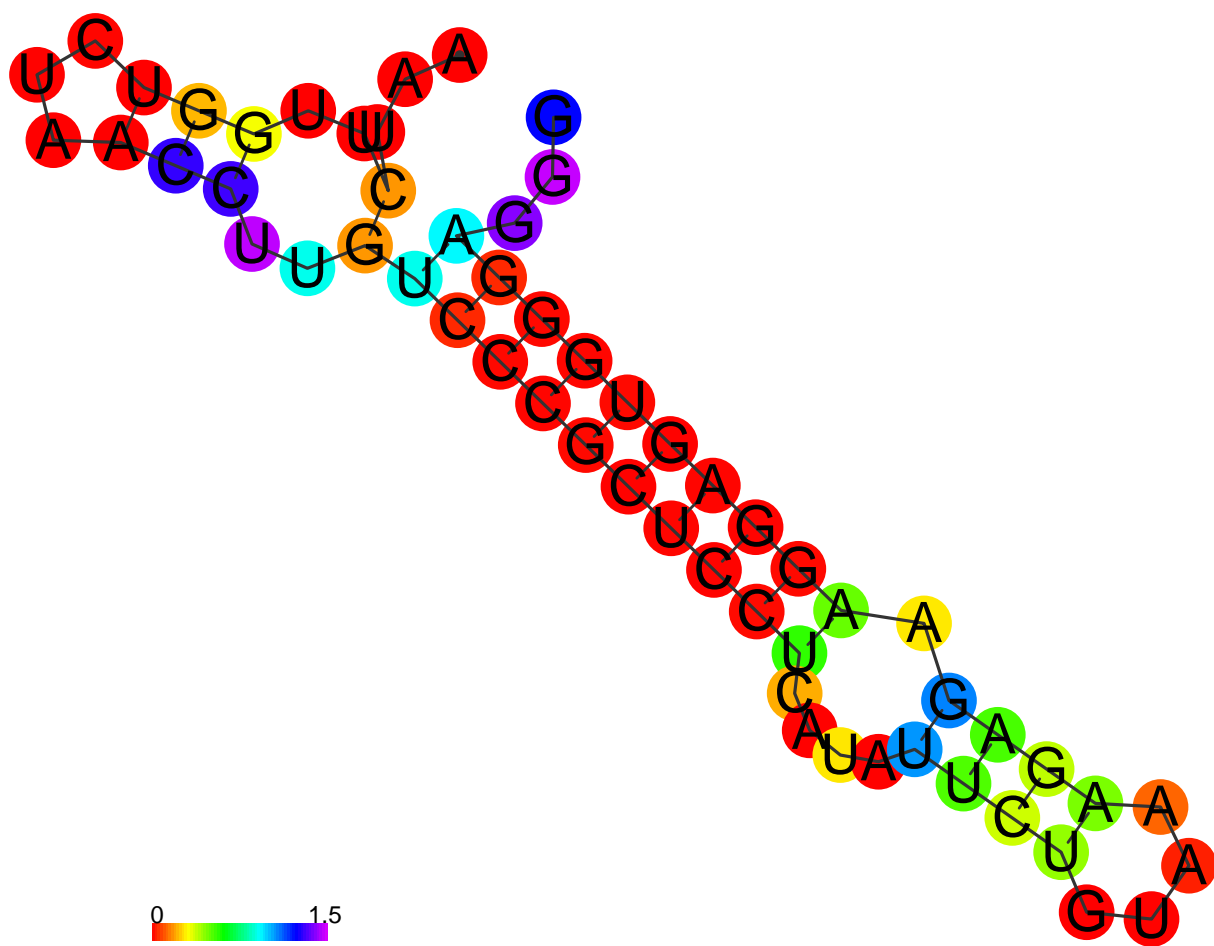

Supplement: Supplementary file 361 [file supplementary]

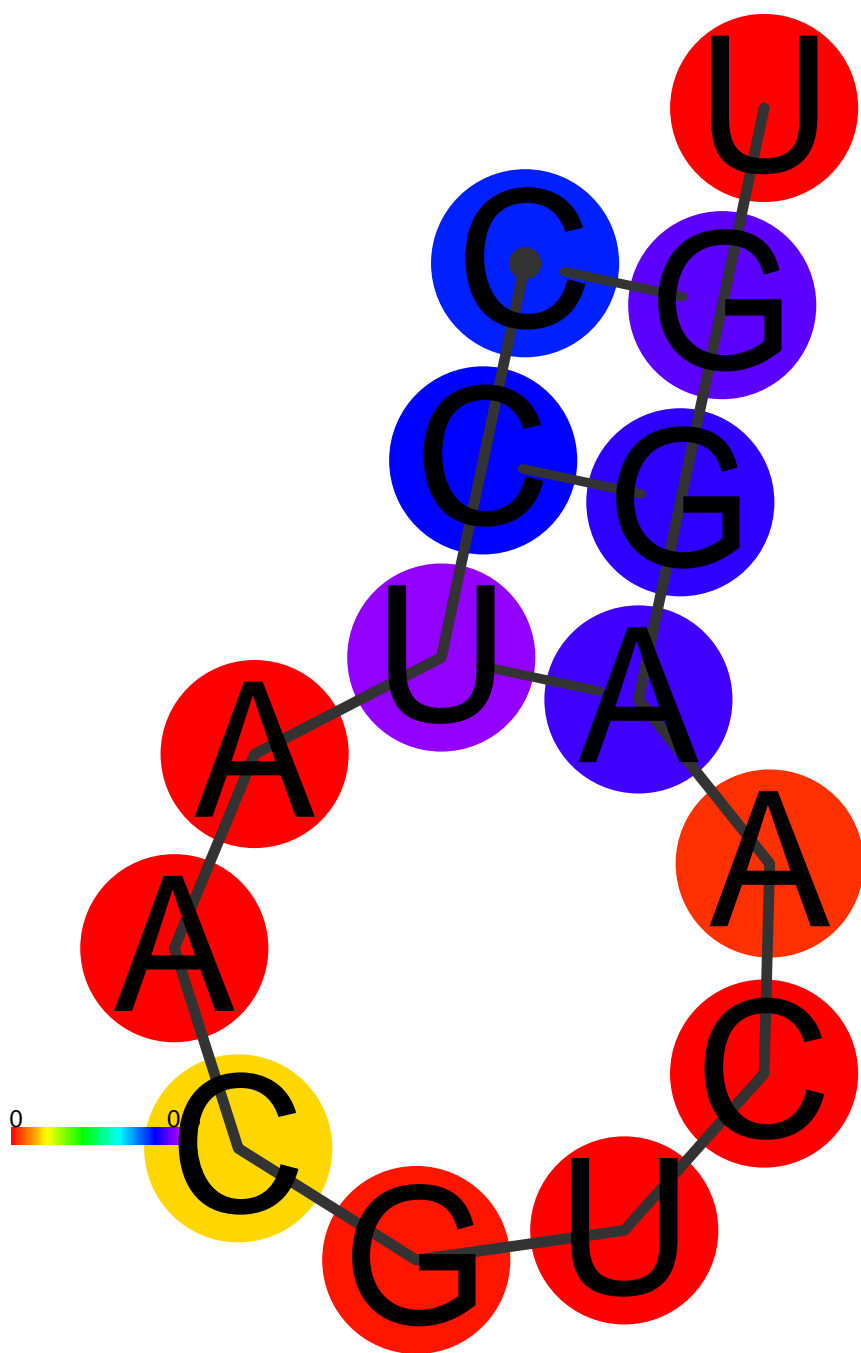

Supplement: Supplementary file 362 [file supplementary]

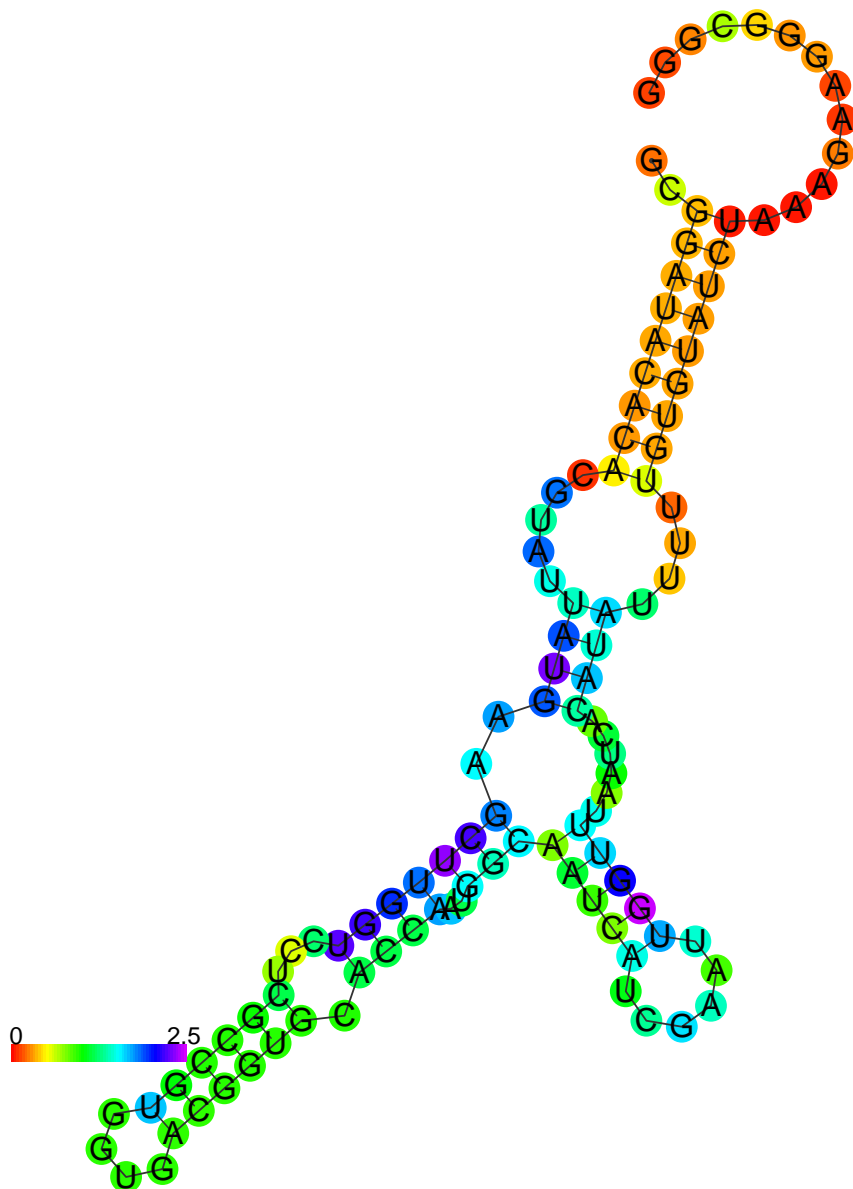

Supplement: Supplementary file 363 [file supplementary]

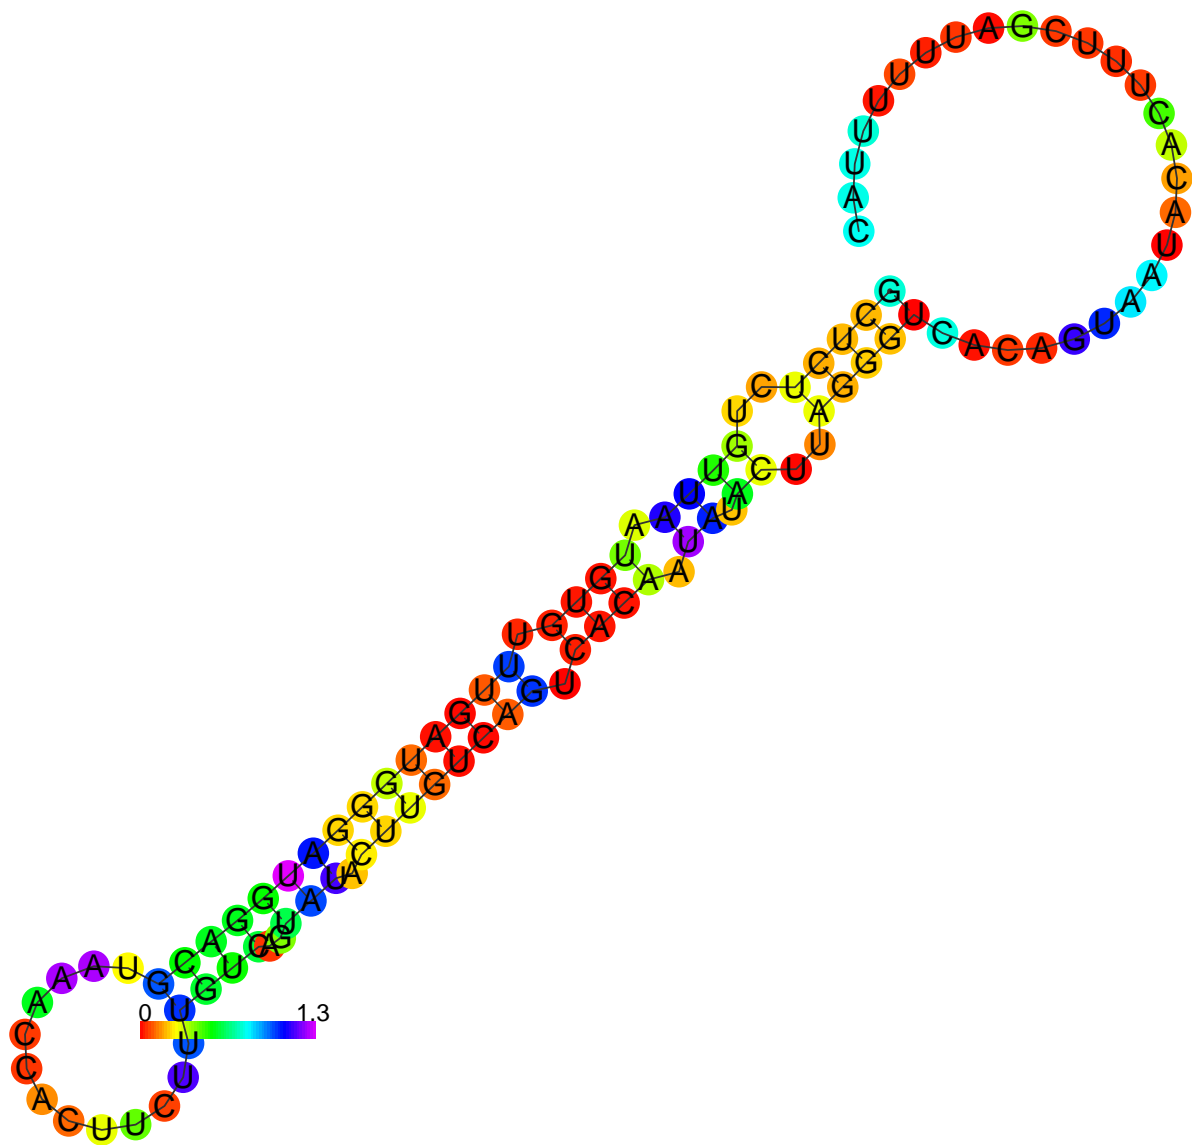

Supplement: Supplementary file 364 [file supplementary]

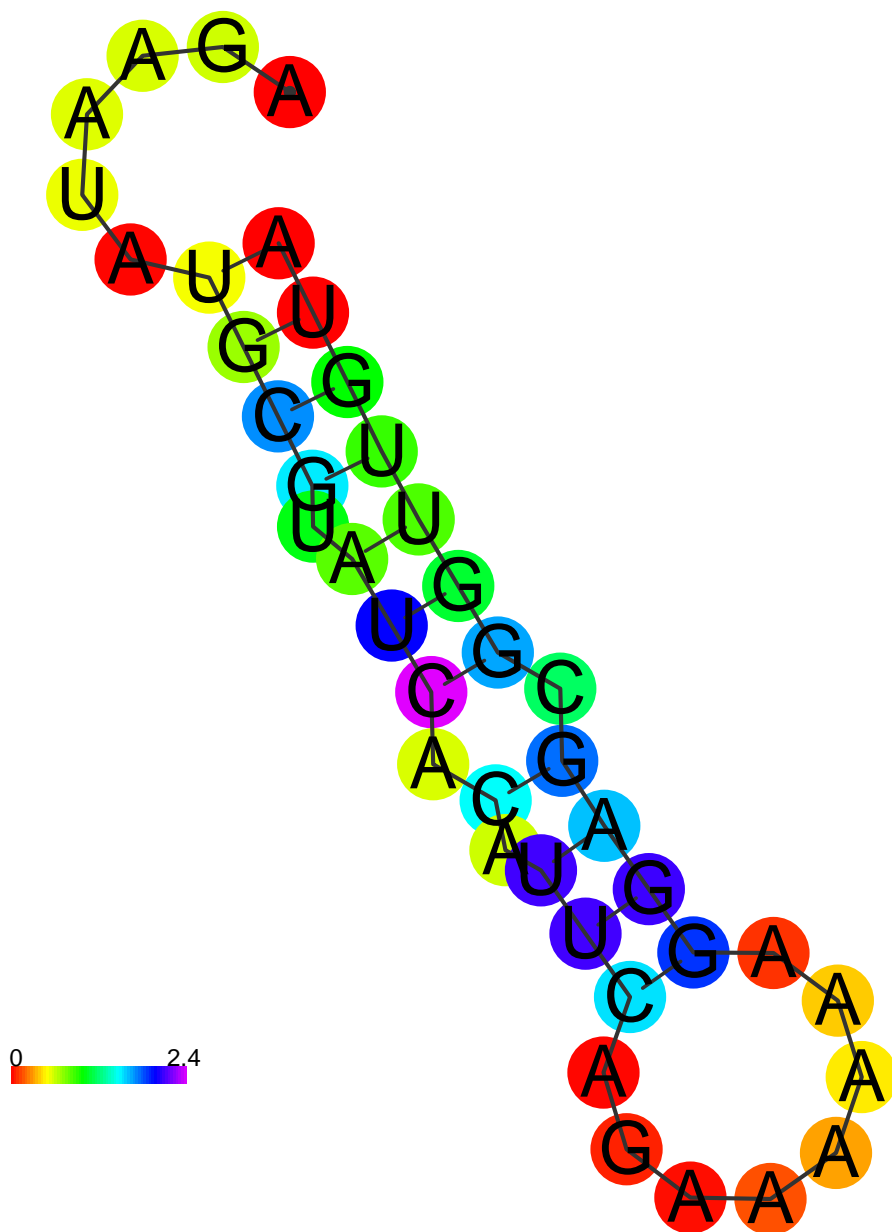

Supplement: Supplementary file 365 [file supplementary]

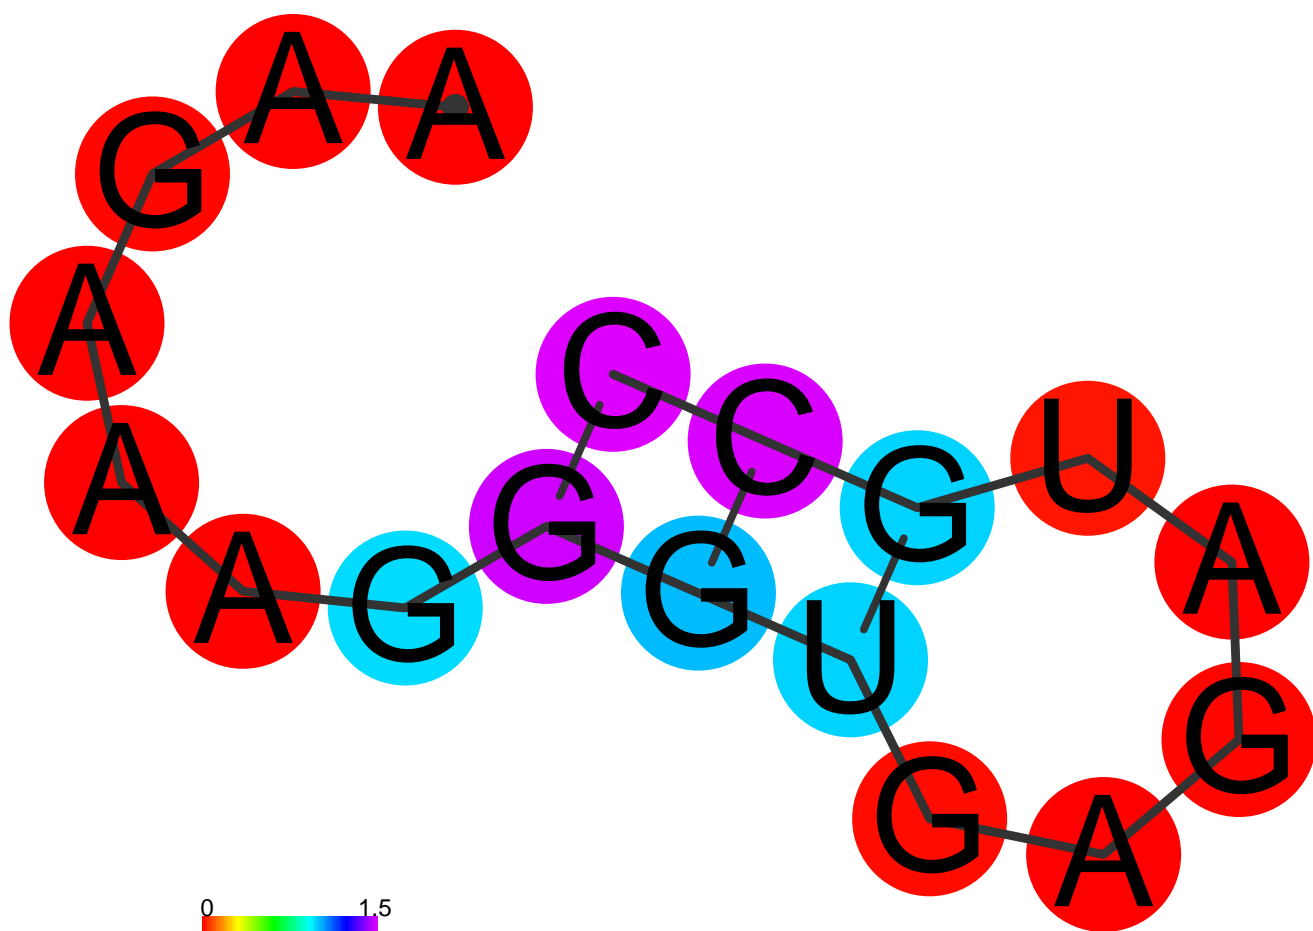

Supplement: Supplementary file 366 [file supplementary]

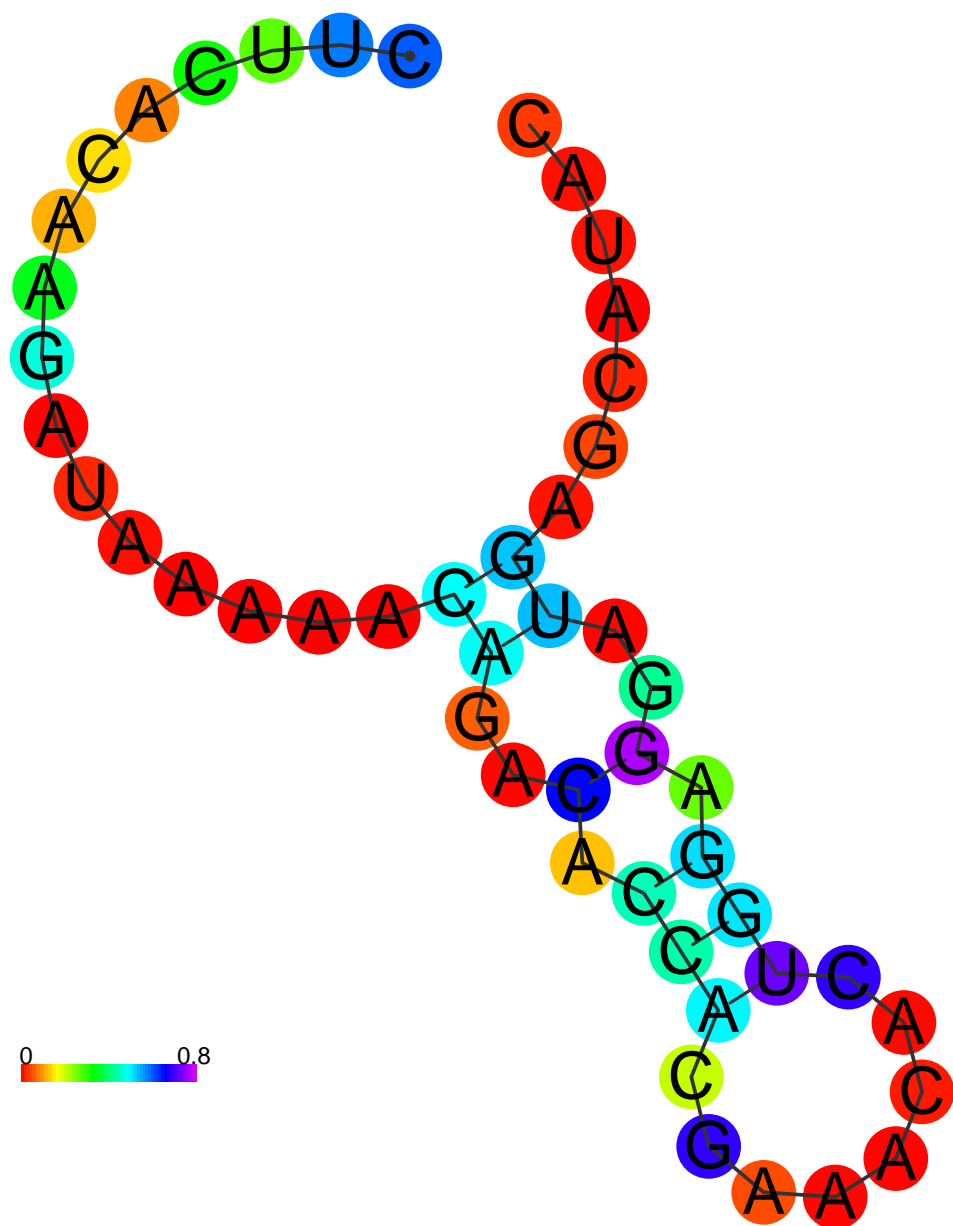

Supplement: Supplementary file 367 [file supplementary]

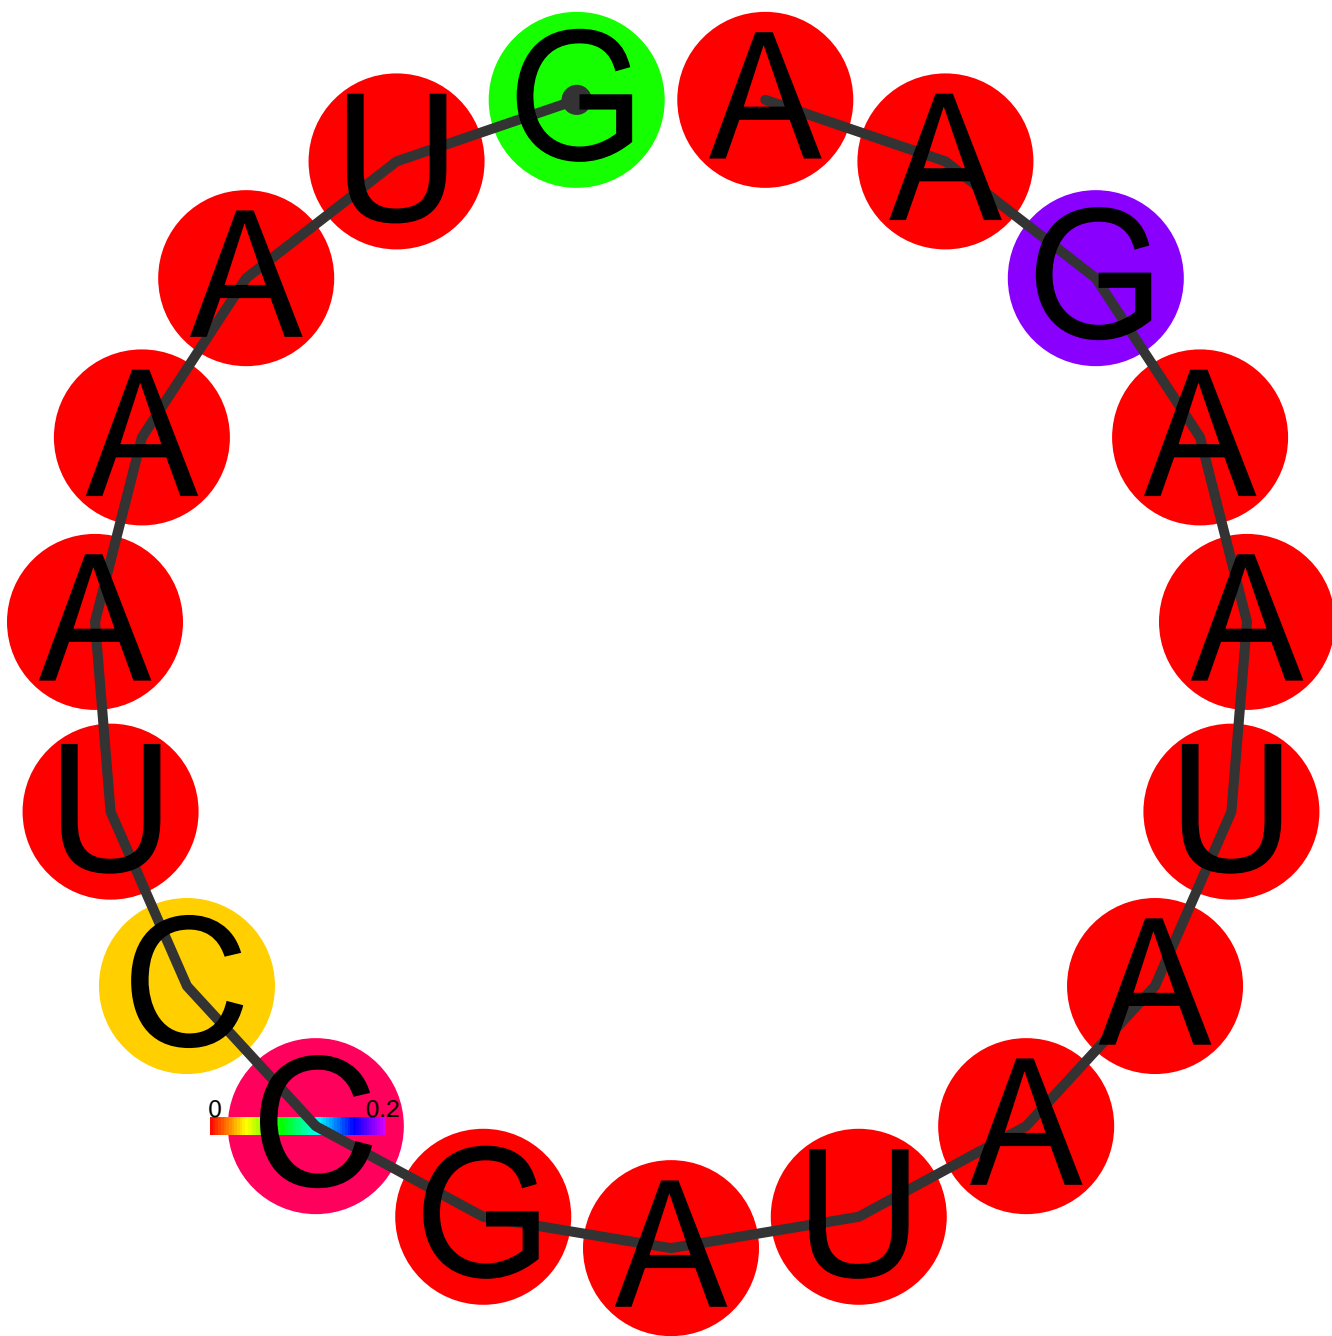

Supplement: Supplementary file 368 [file supplementary]

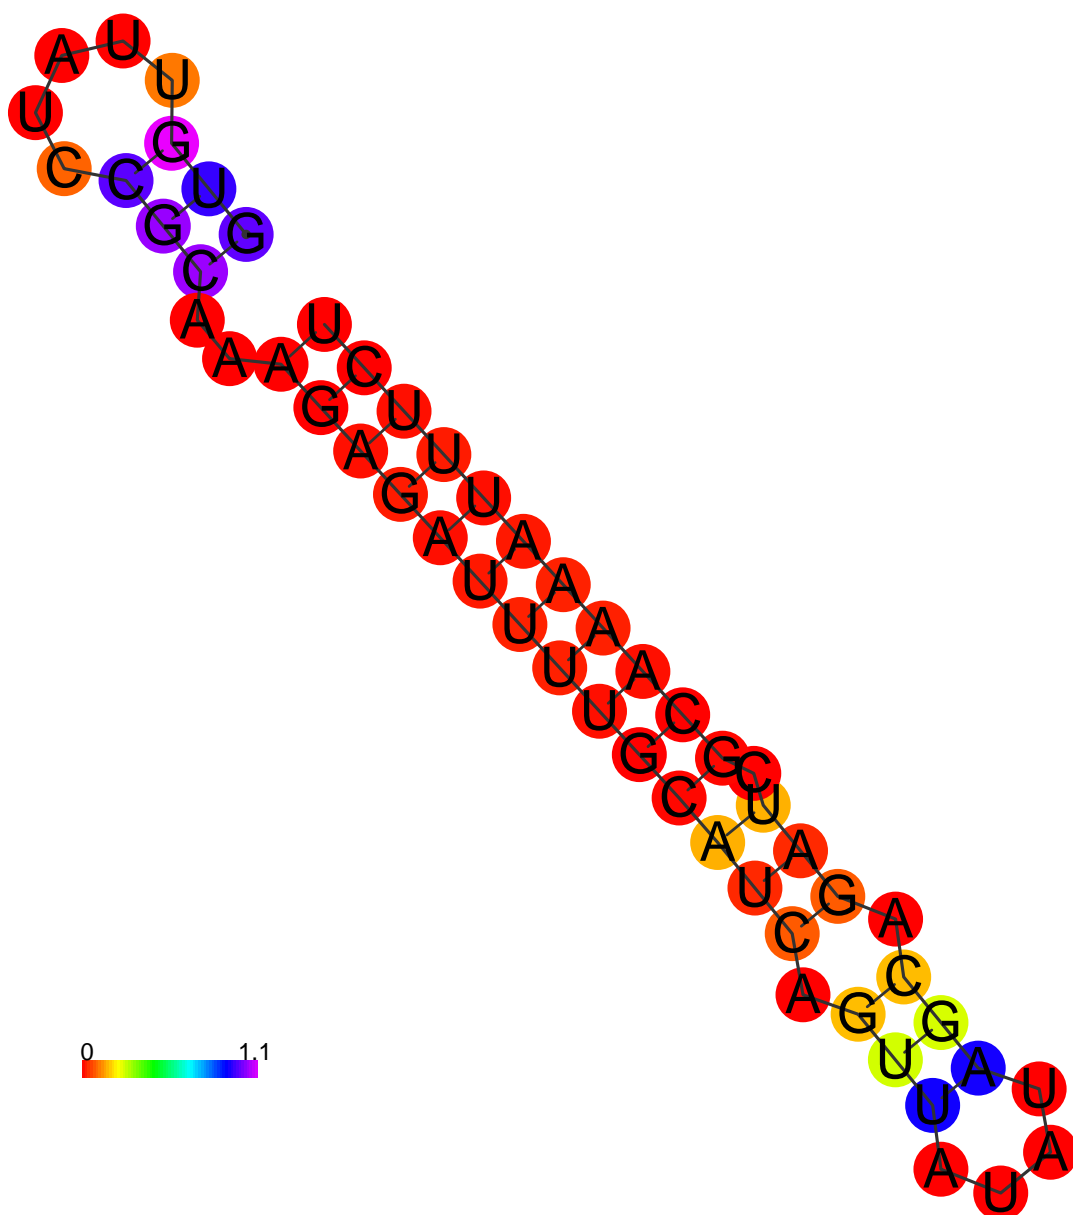

Supplement: Supplementary file 369 [file supplementary]

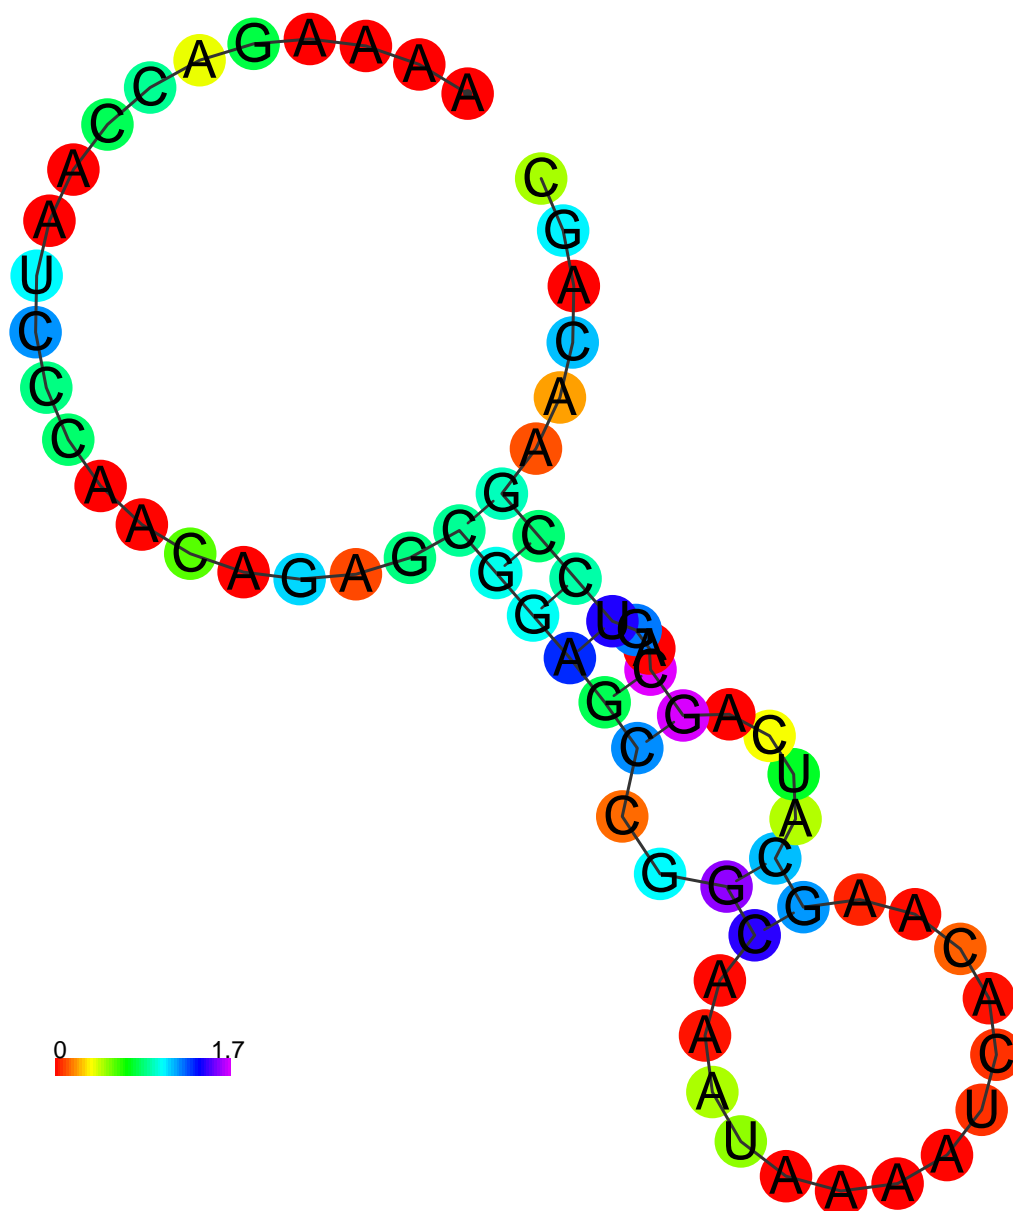

Supplement: Supplementary file 370 [file supplementary]

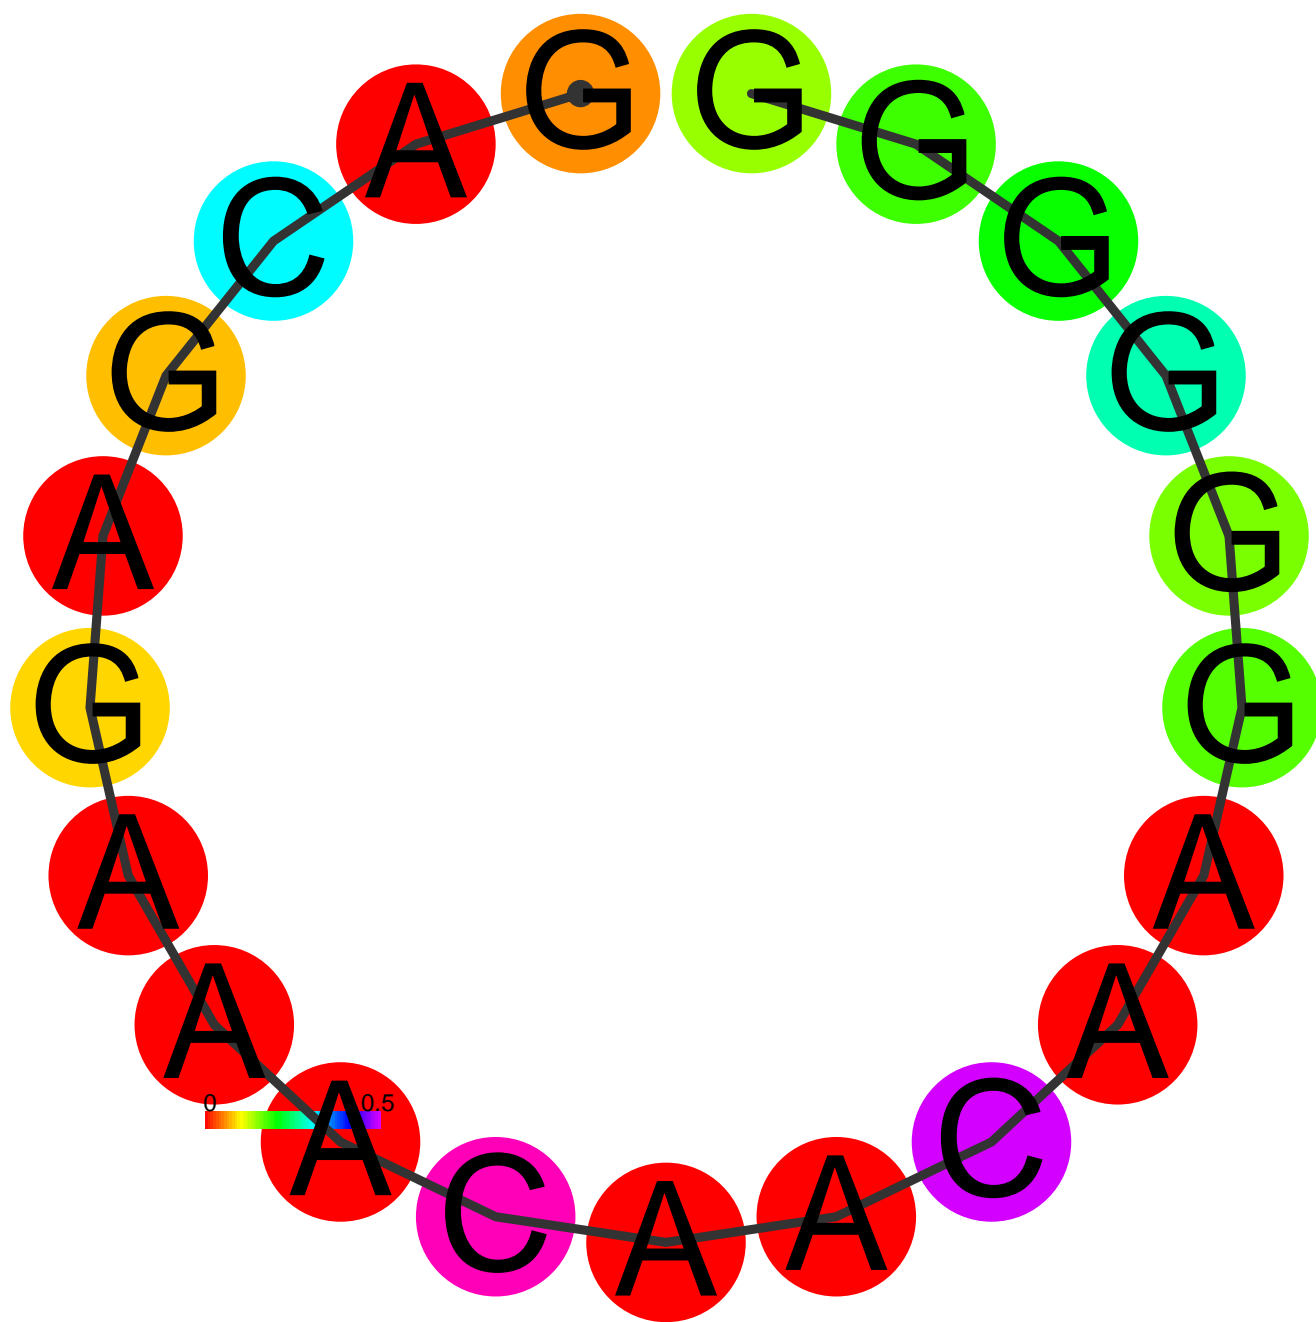

Supplement: Supplementary file 371 [file supplementary]

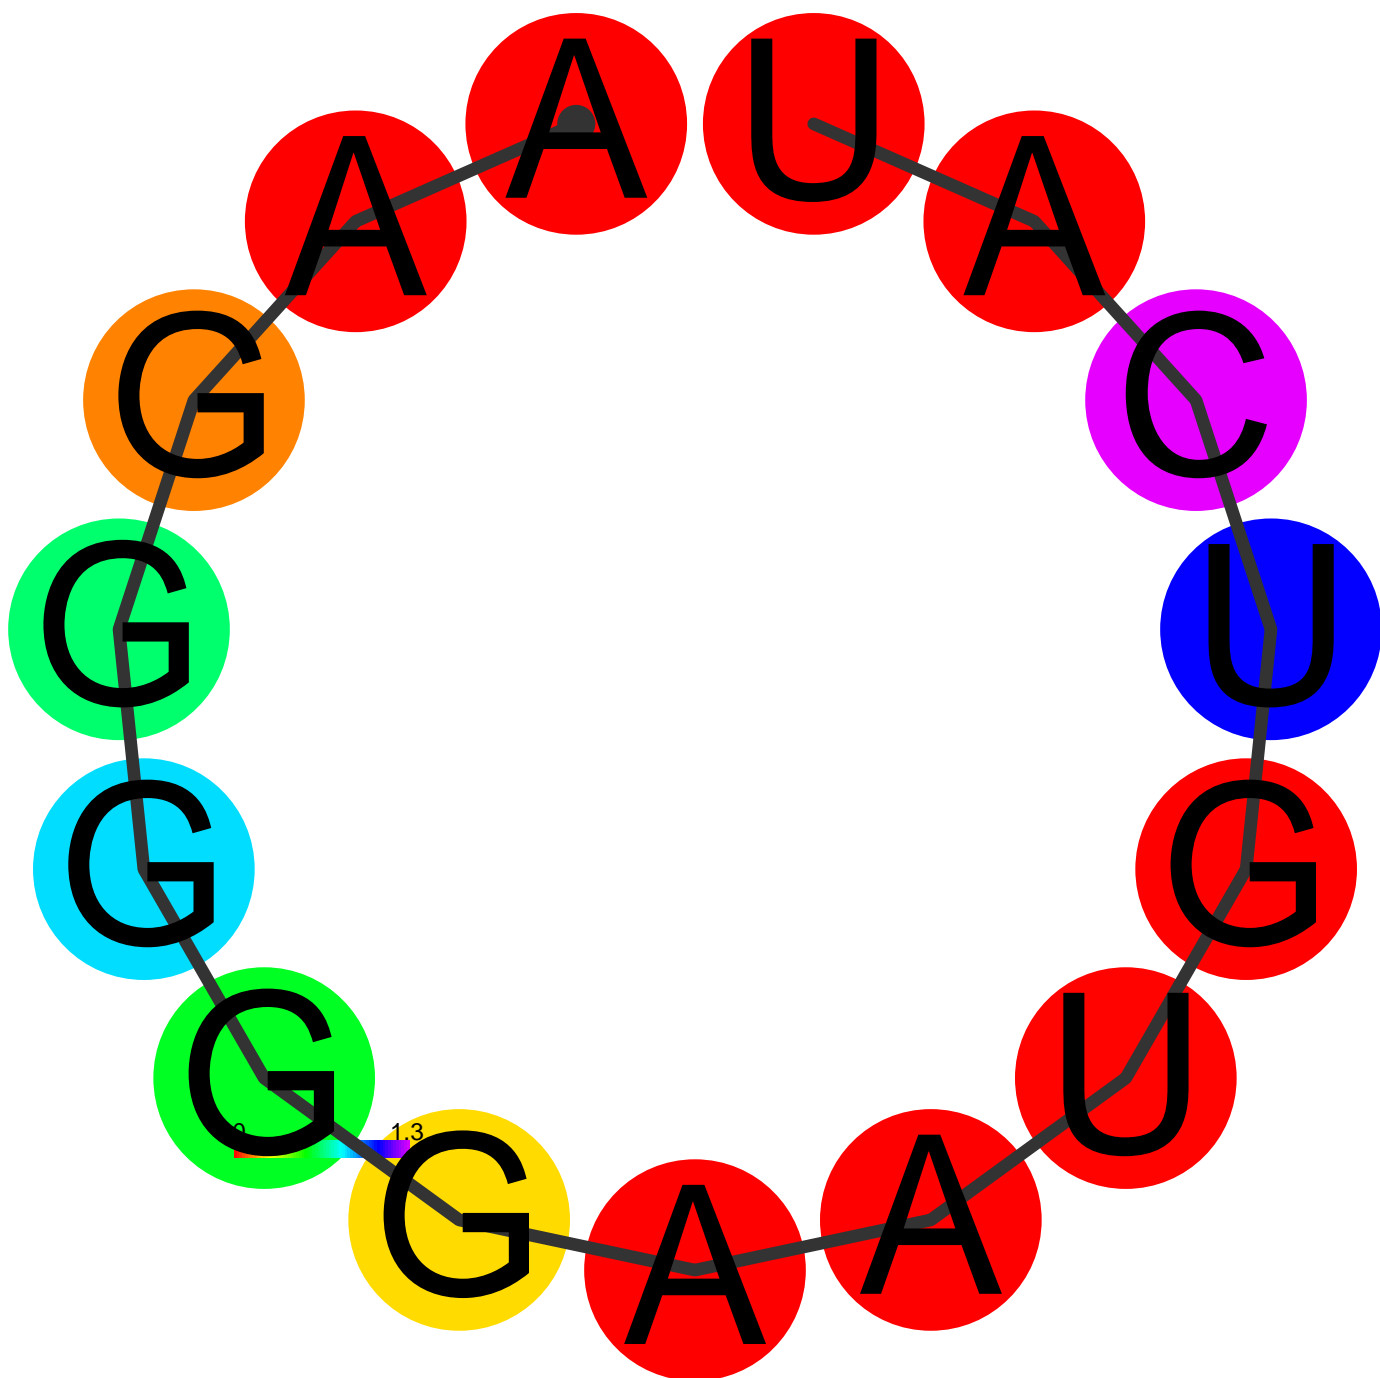

Supplement: Supplementary file 372 [file supplementary]

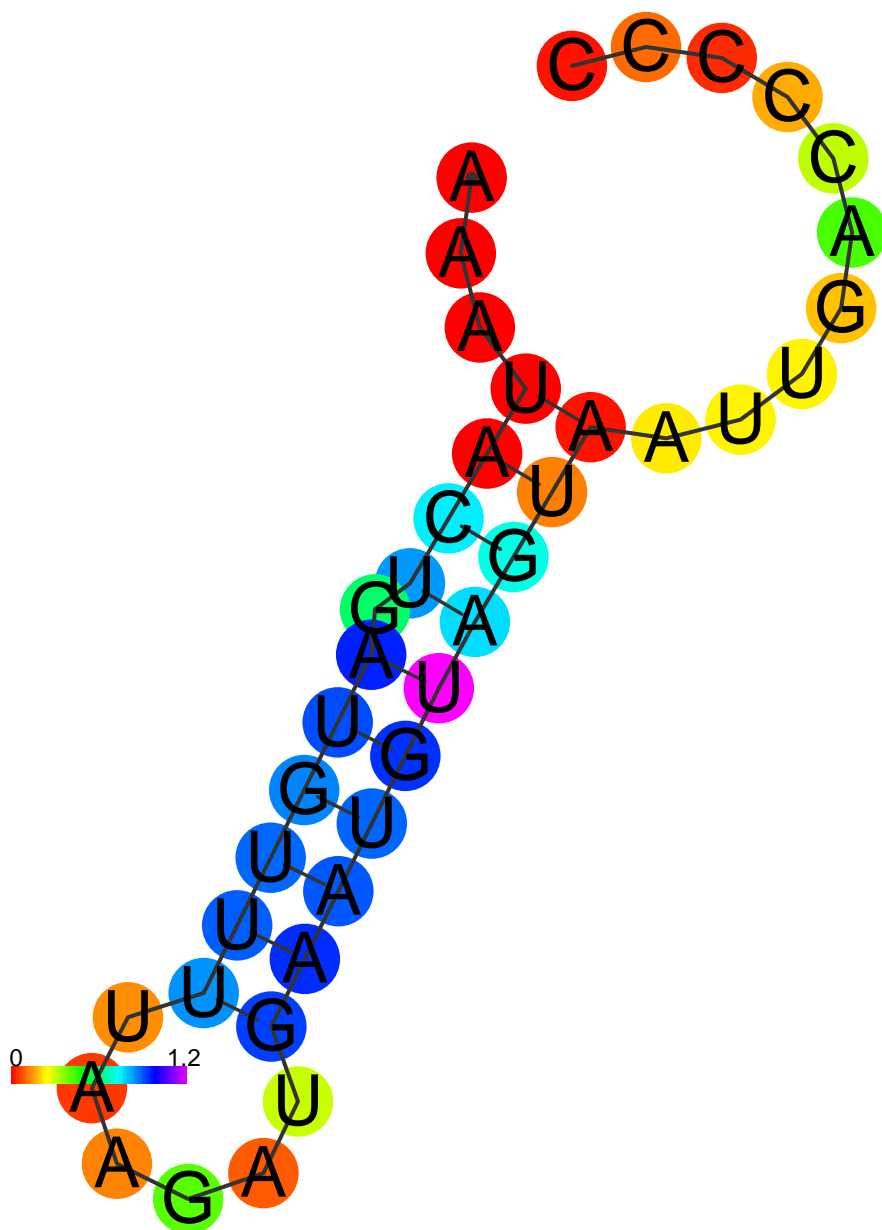

Supplement: Supplementary file 373 [file supplementary]

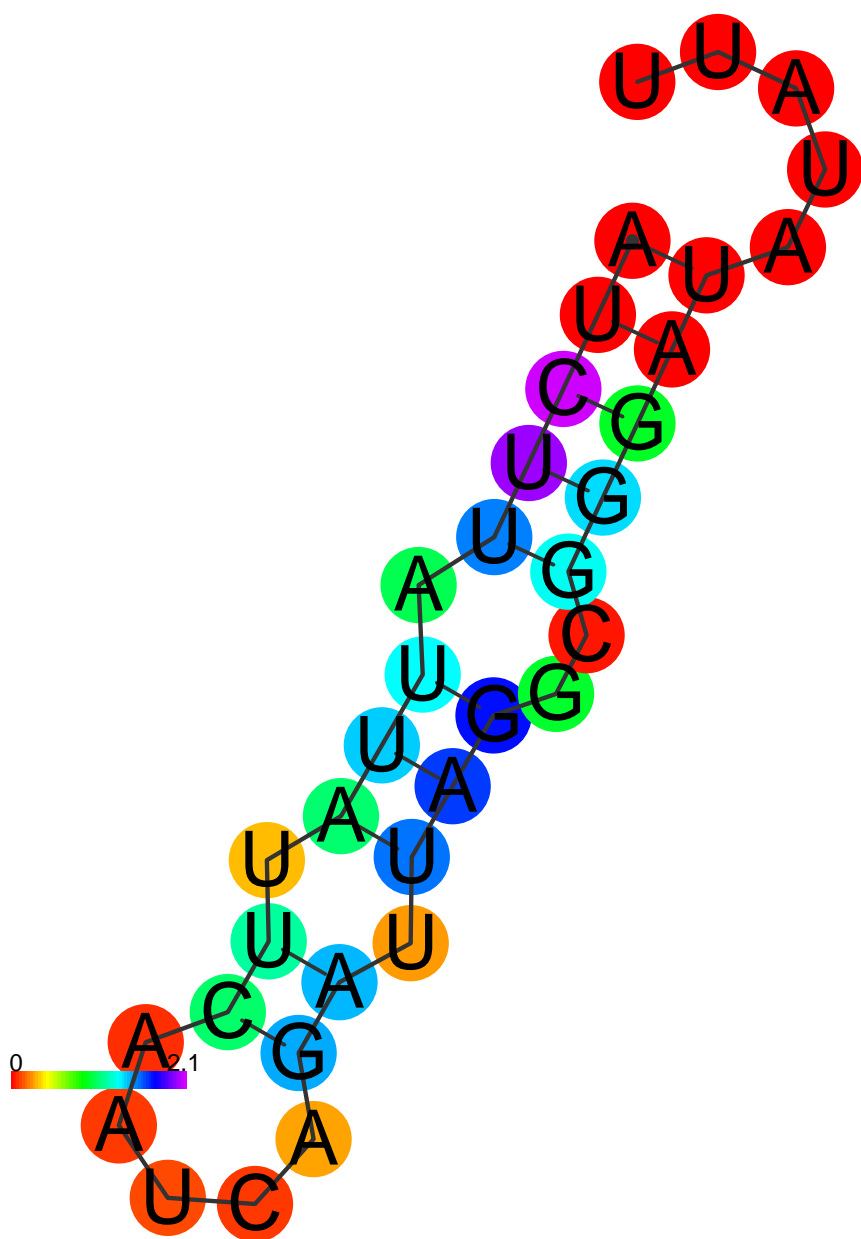

Supplement: Supplementary file 374 [file supplementary]

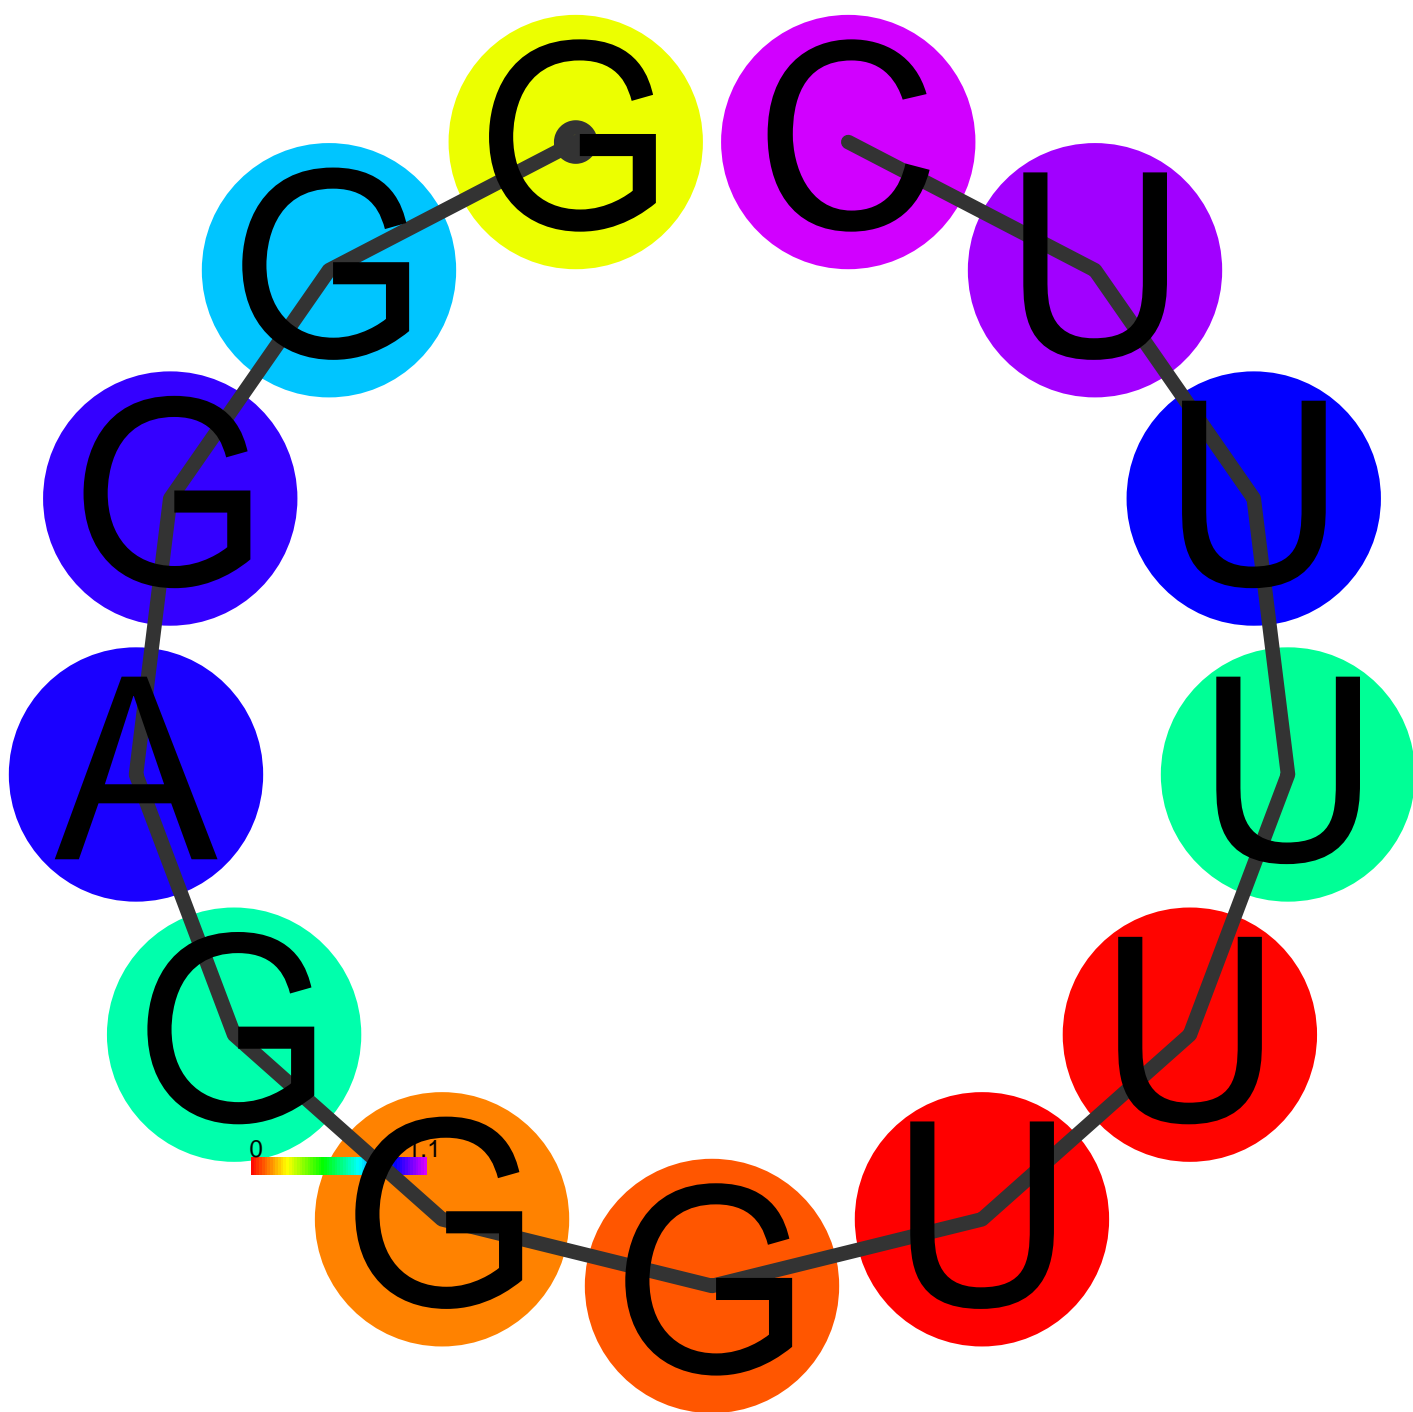

Supplement: Supplementary file 375 [file supplementary]

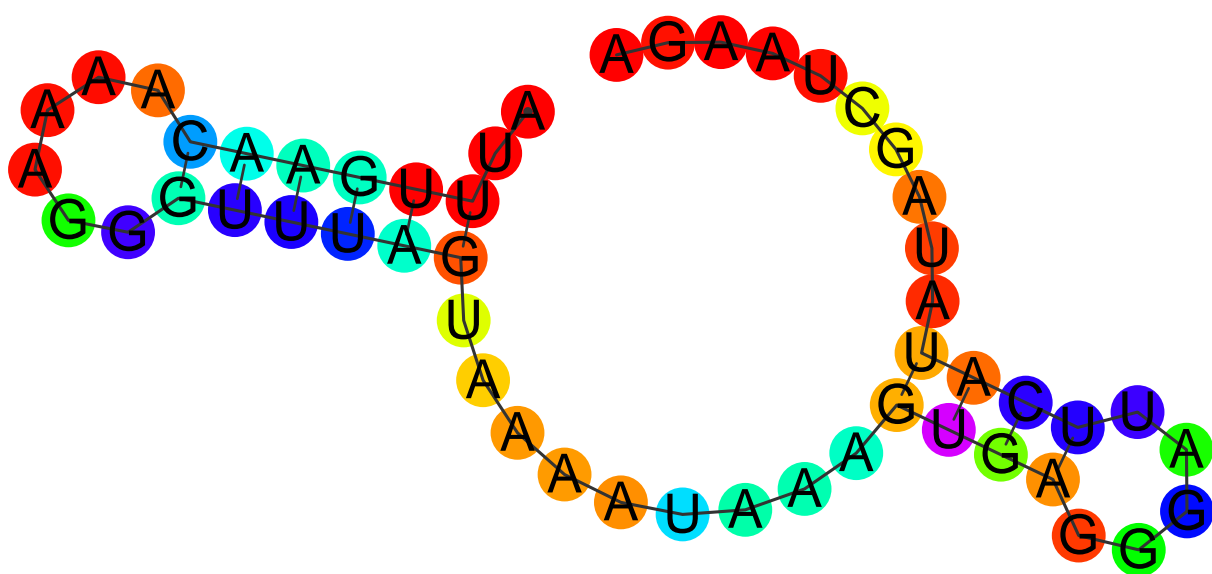

Supplement: Supplementary file 376 [file supplementary]



Supplement: Supplementary file 377 [file supplementary]

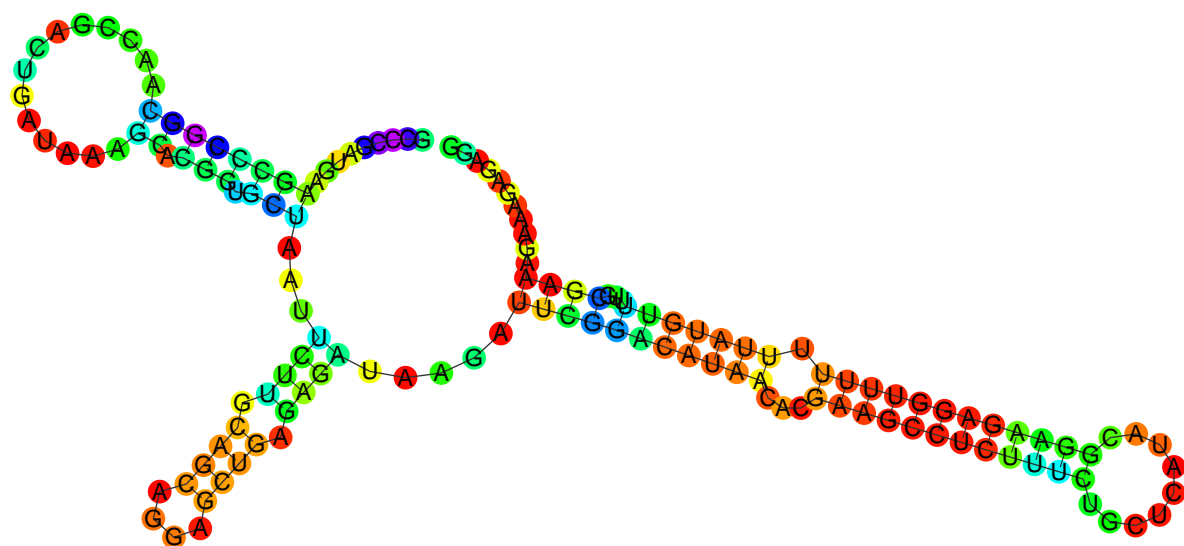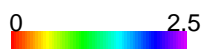

Supplement: Supplementary file 378 [file supplementary]

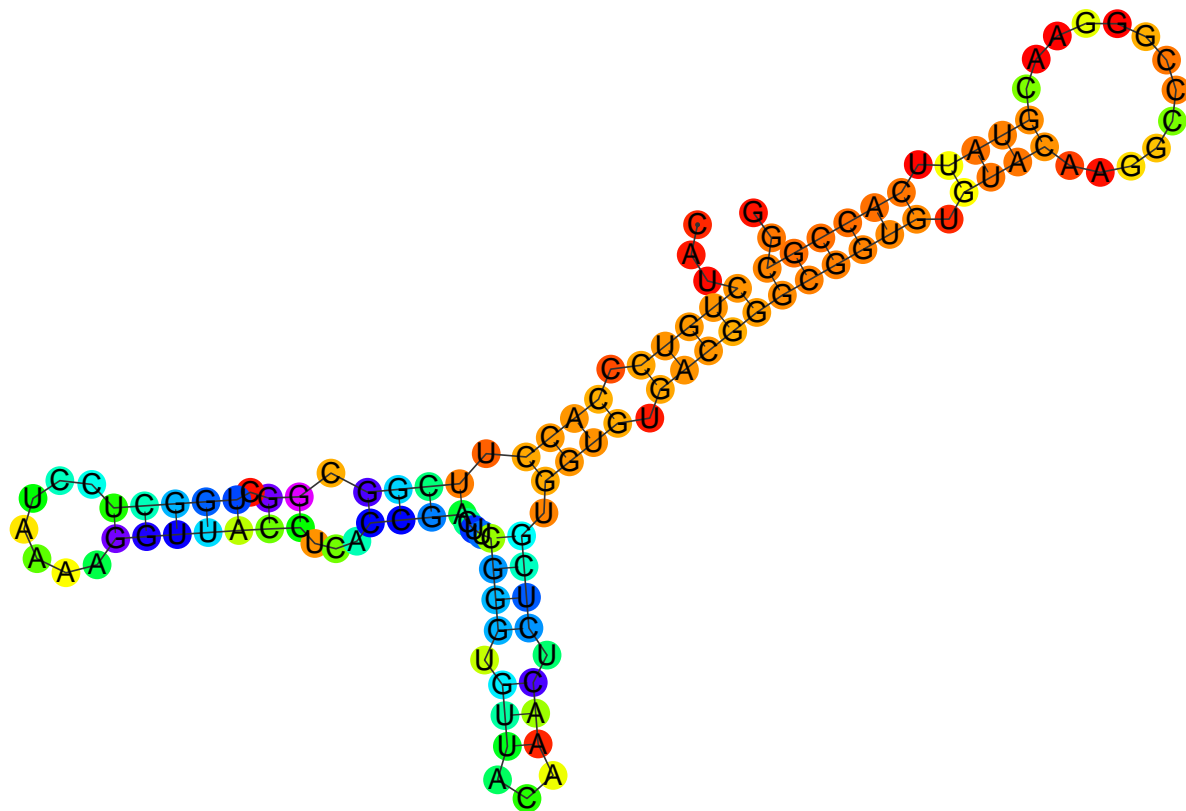

Supplement: Supplementary file 379 [file supplementary]

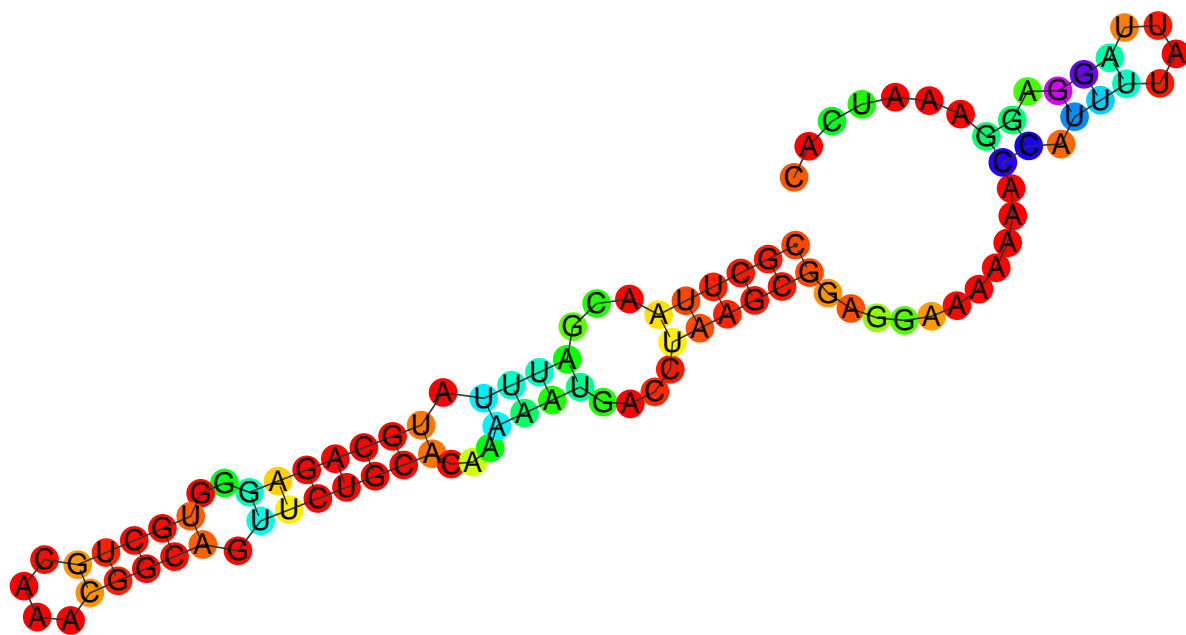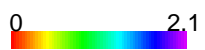

Supplement: Supplementary file 380 [file supplementary]

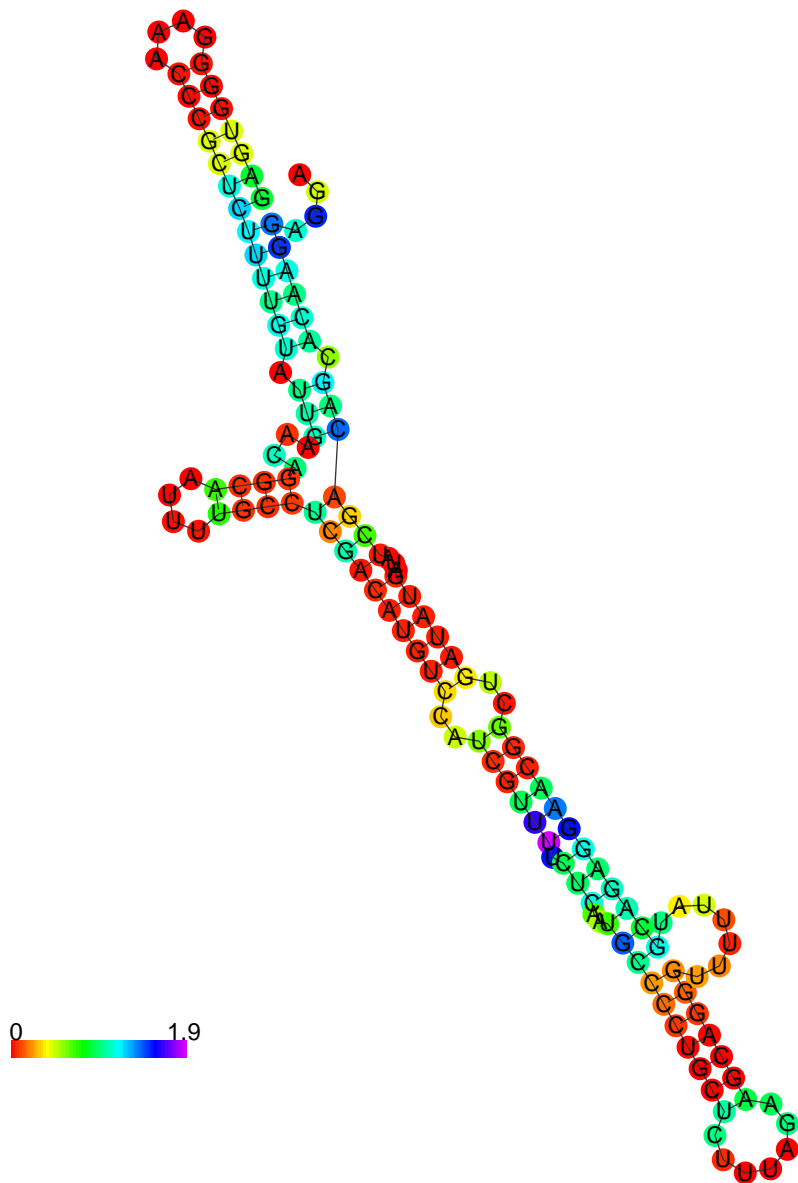

Supplement: Supplementary file 381 [file supplementary]

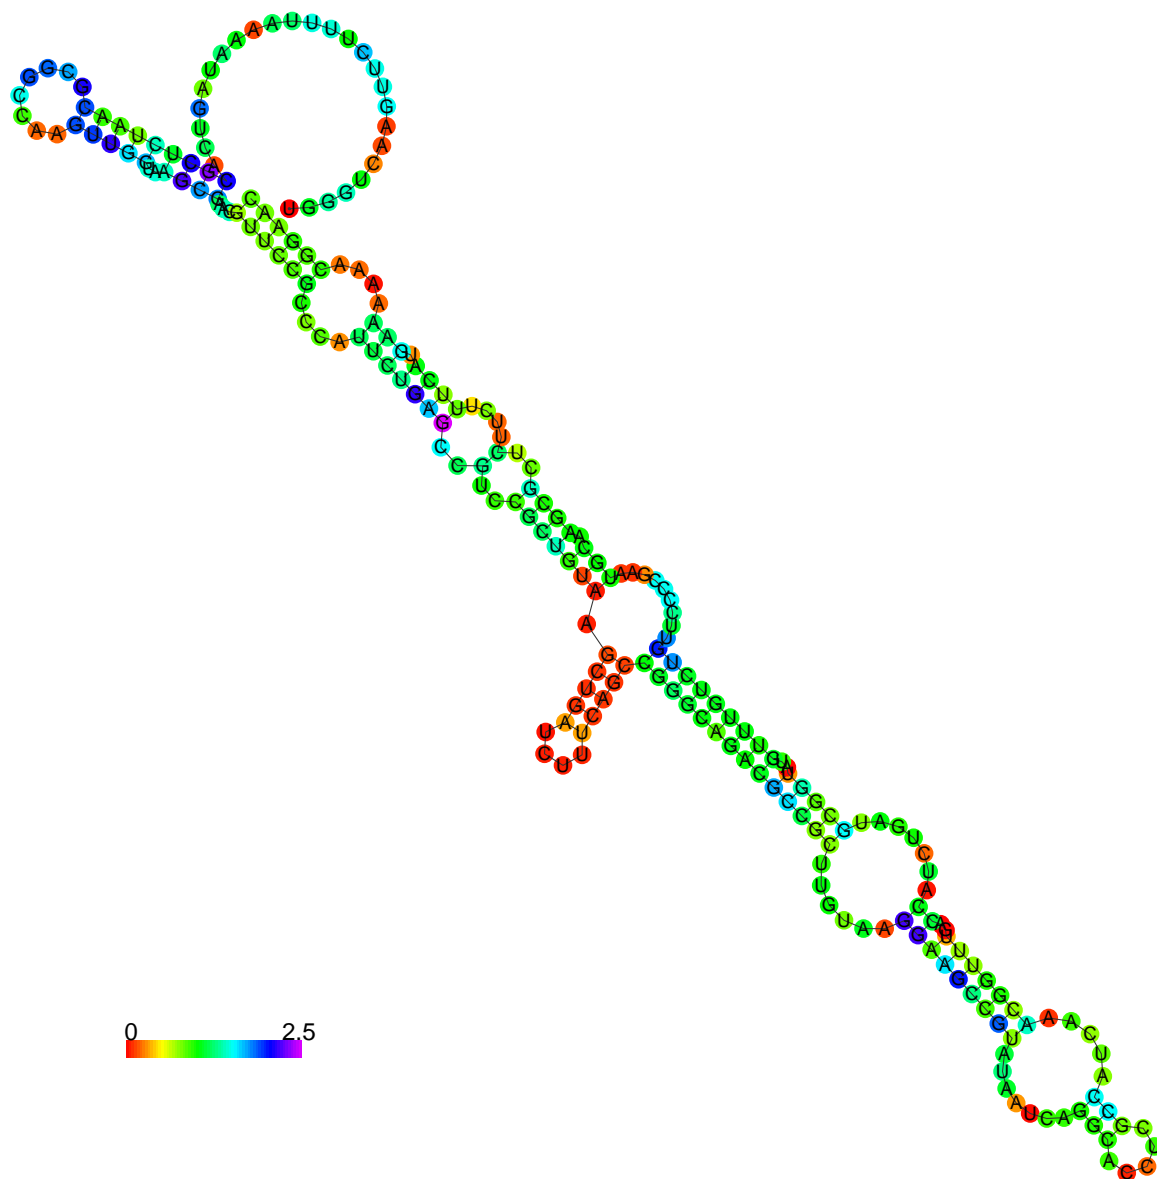

Supplement: Supplementary file 382 [file supplementary]

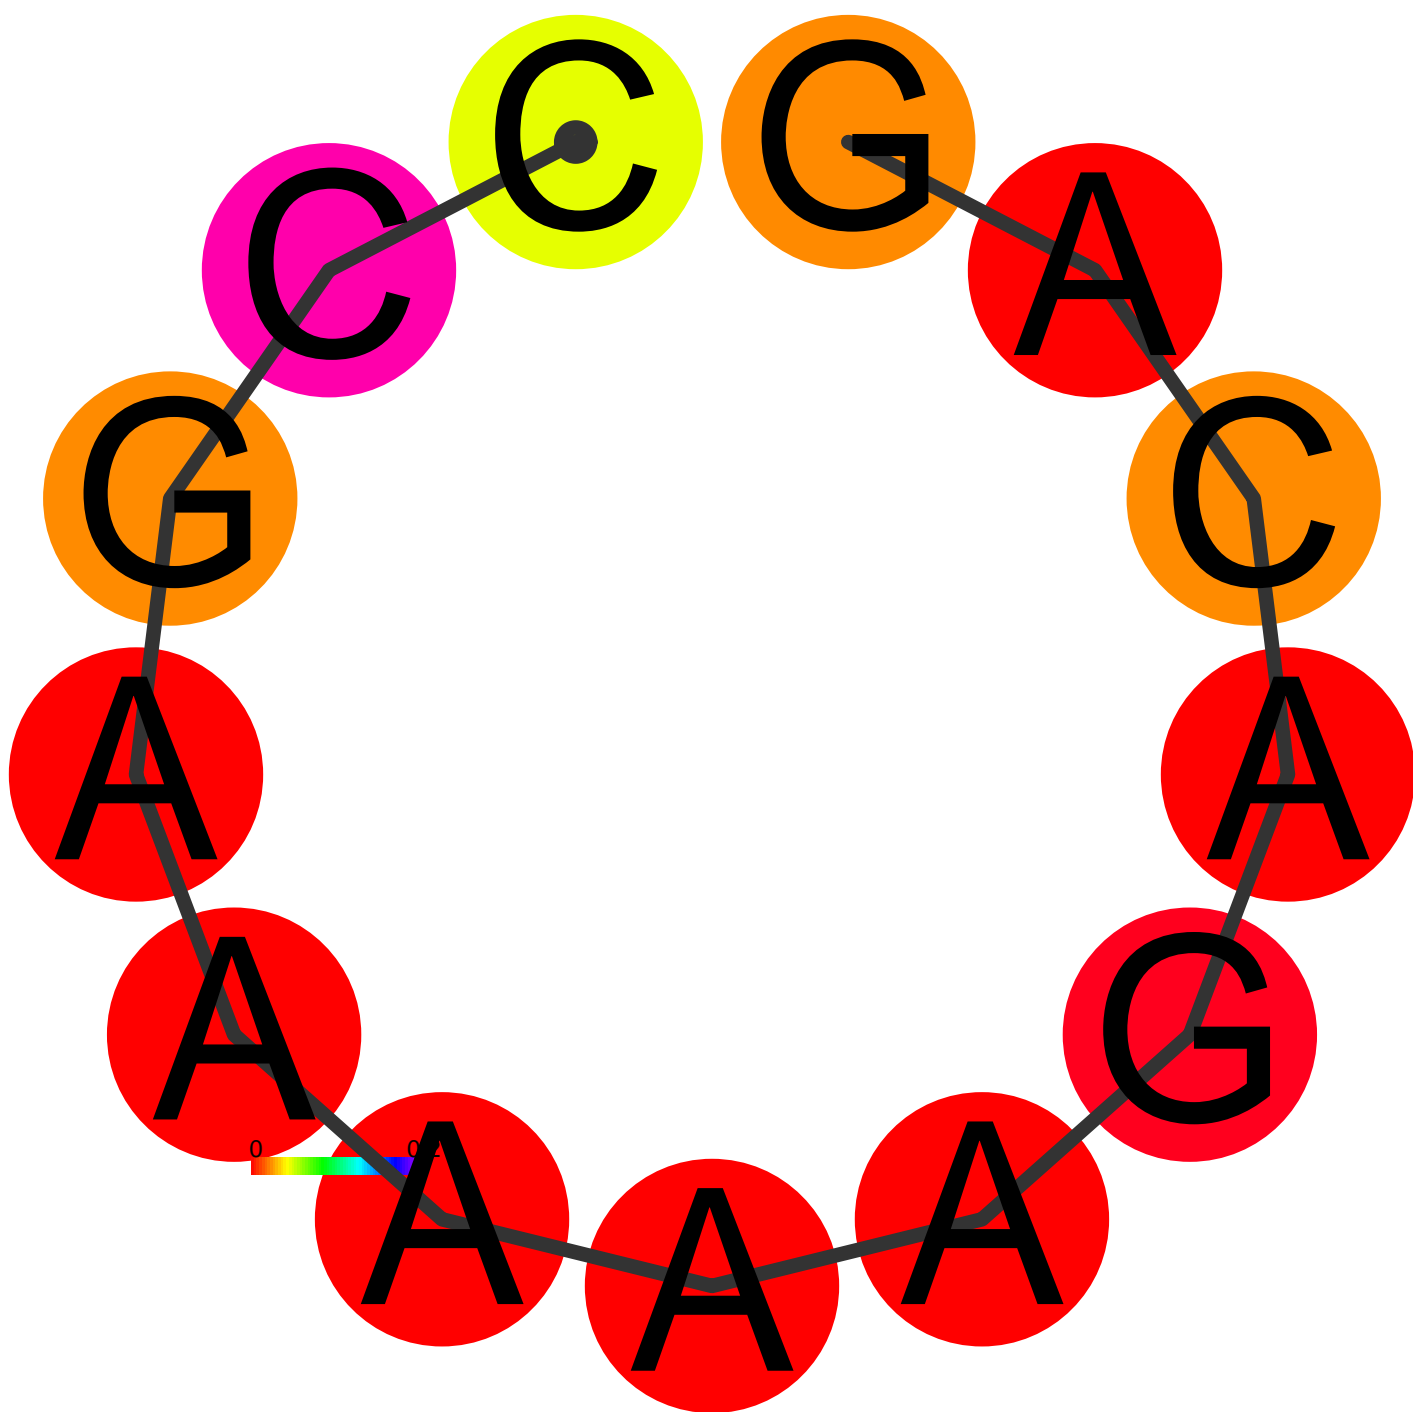

Supplement: Supplementary file 383 [file supplementary]

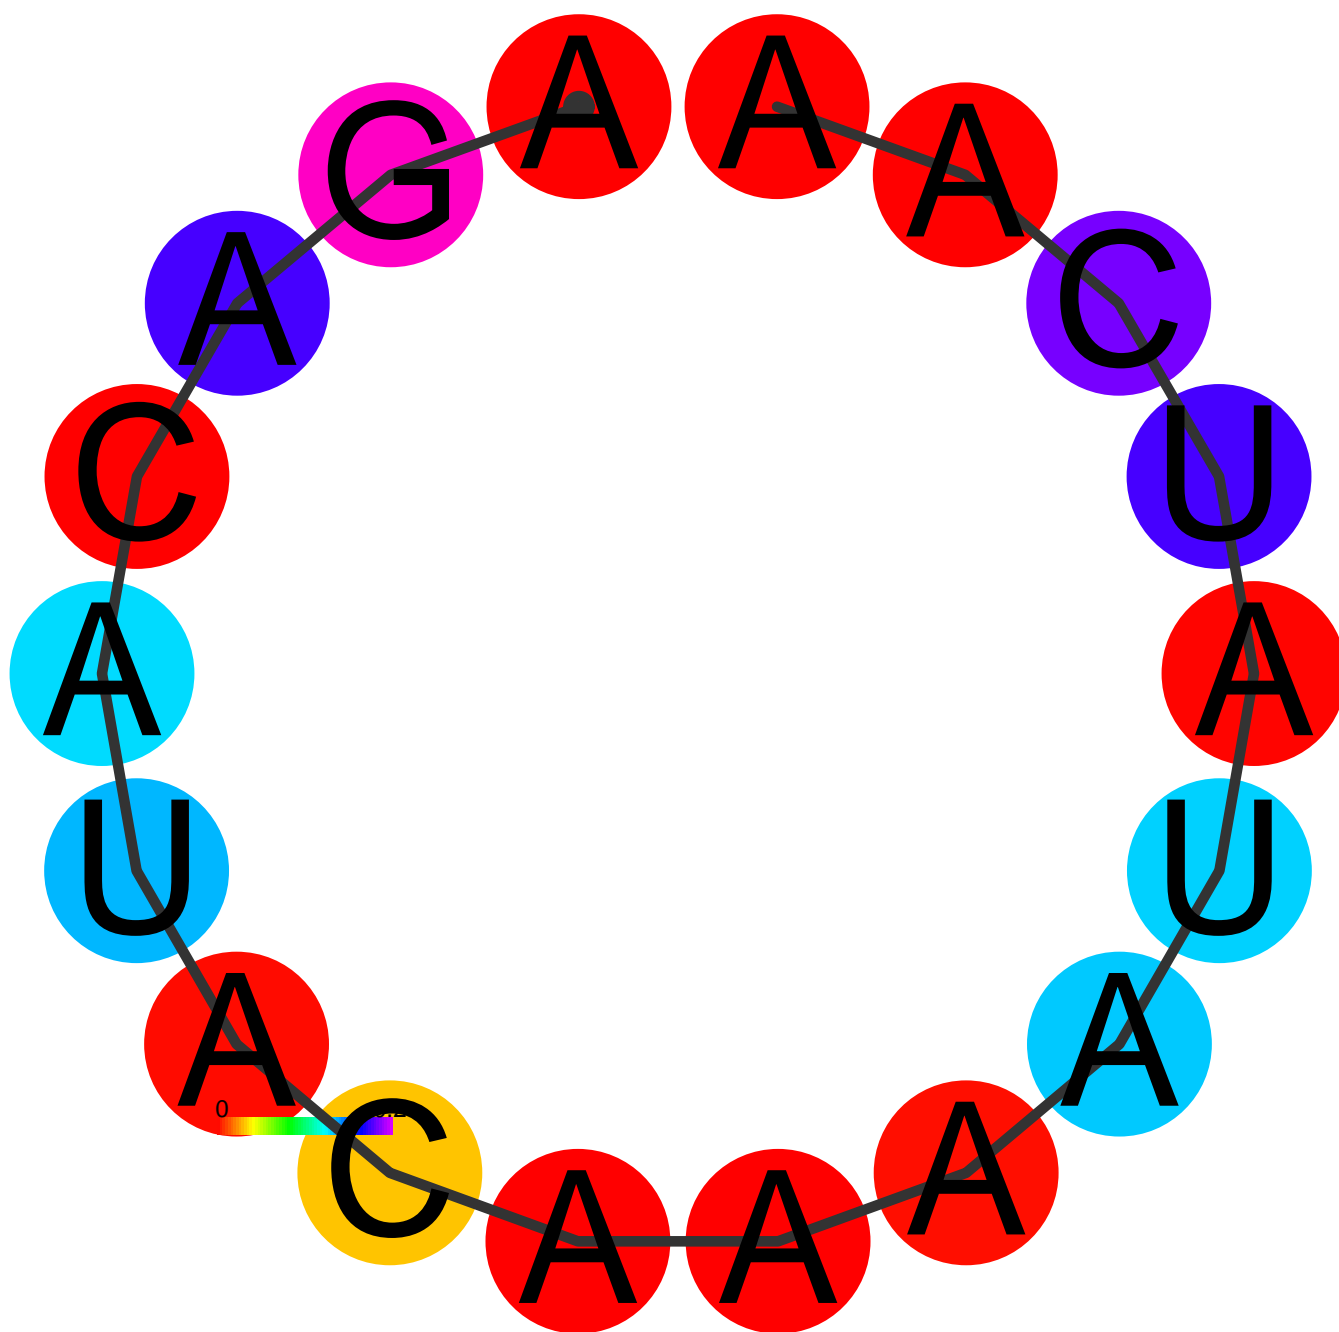

Supplement: Supplementary file 384 [file supplementary]

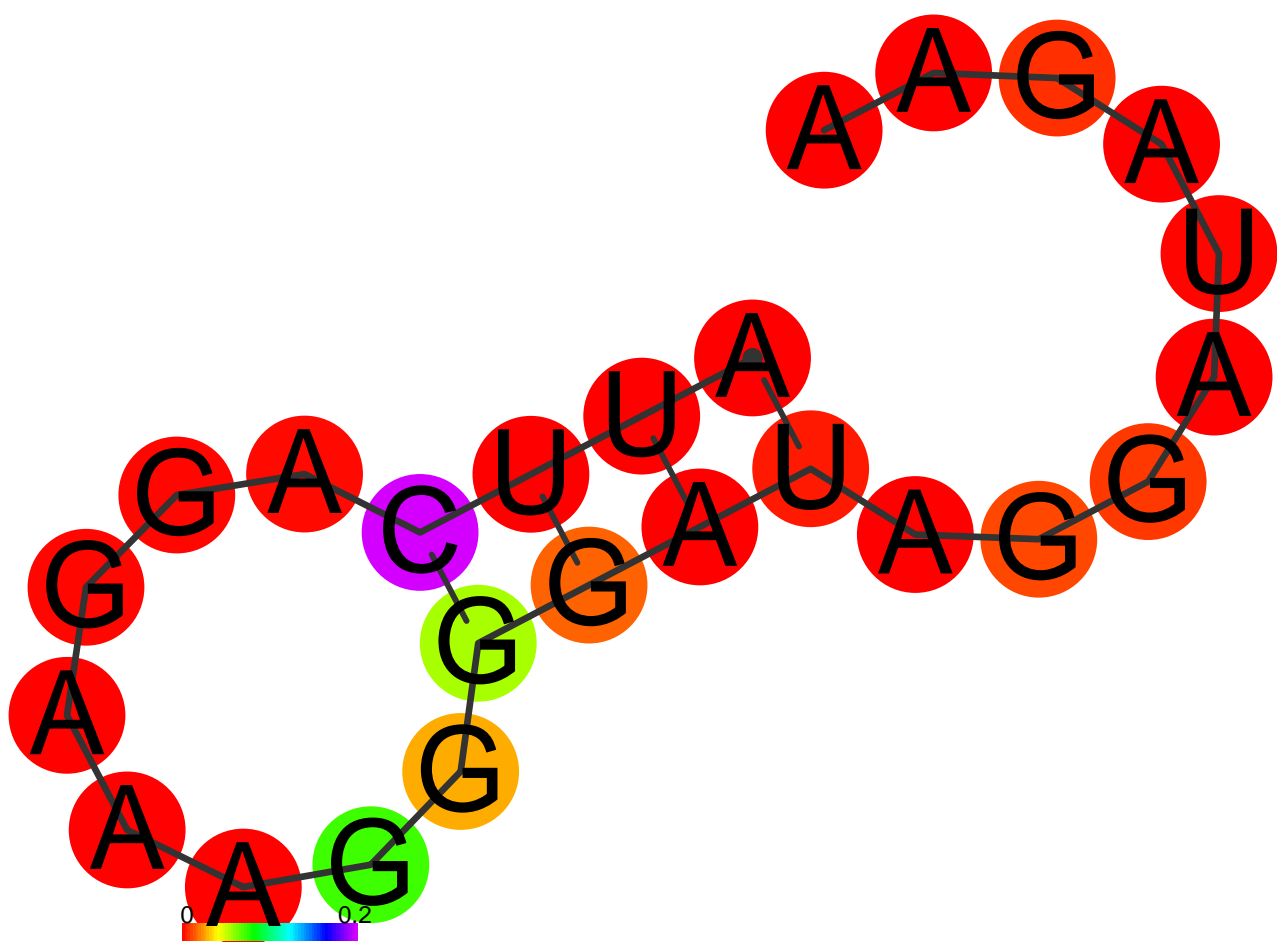

Supplement: Supplementary file 385 [file supplementary]

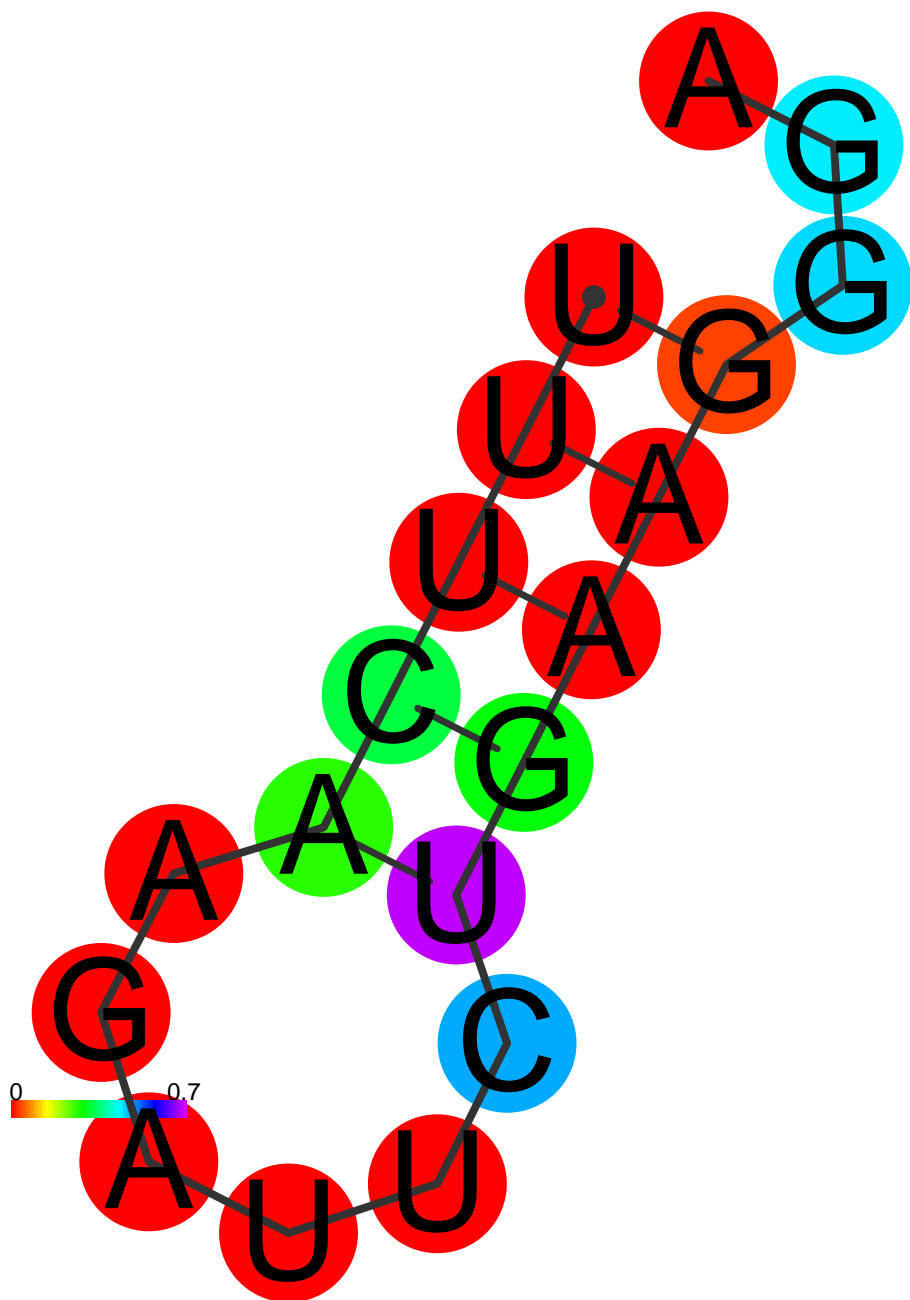

Supplement: Supplementary file 386 [file supplementary]



Supplement: Supplementary file 387 [file supplementary]

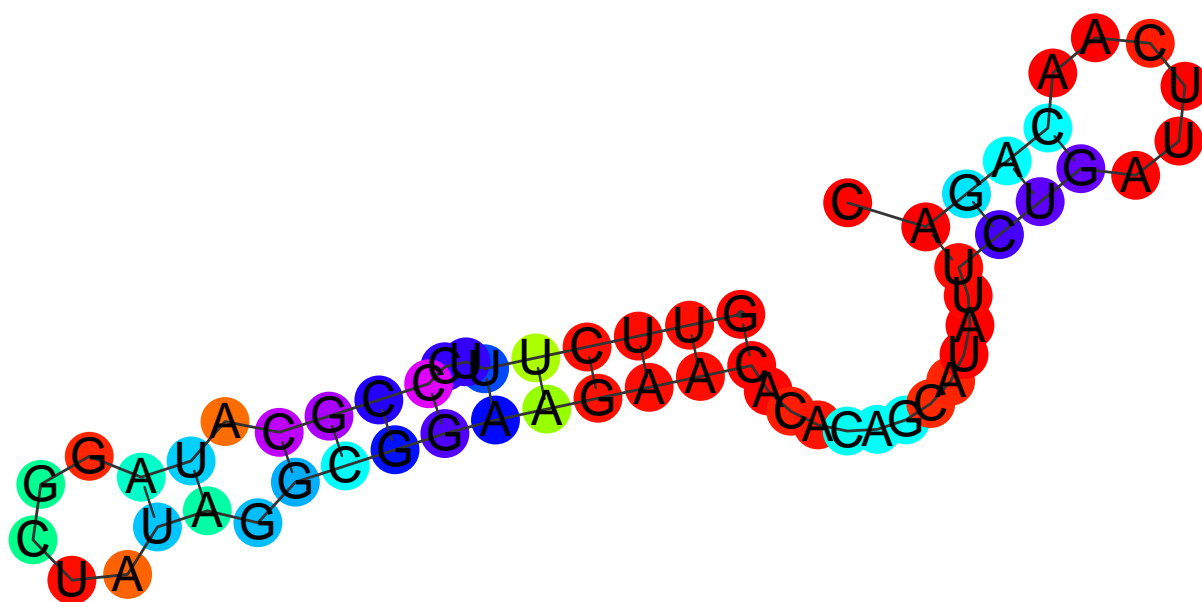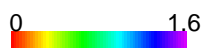

Supplement: Supplementary file 388 [file supplementary]

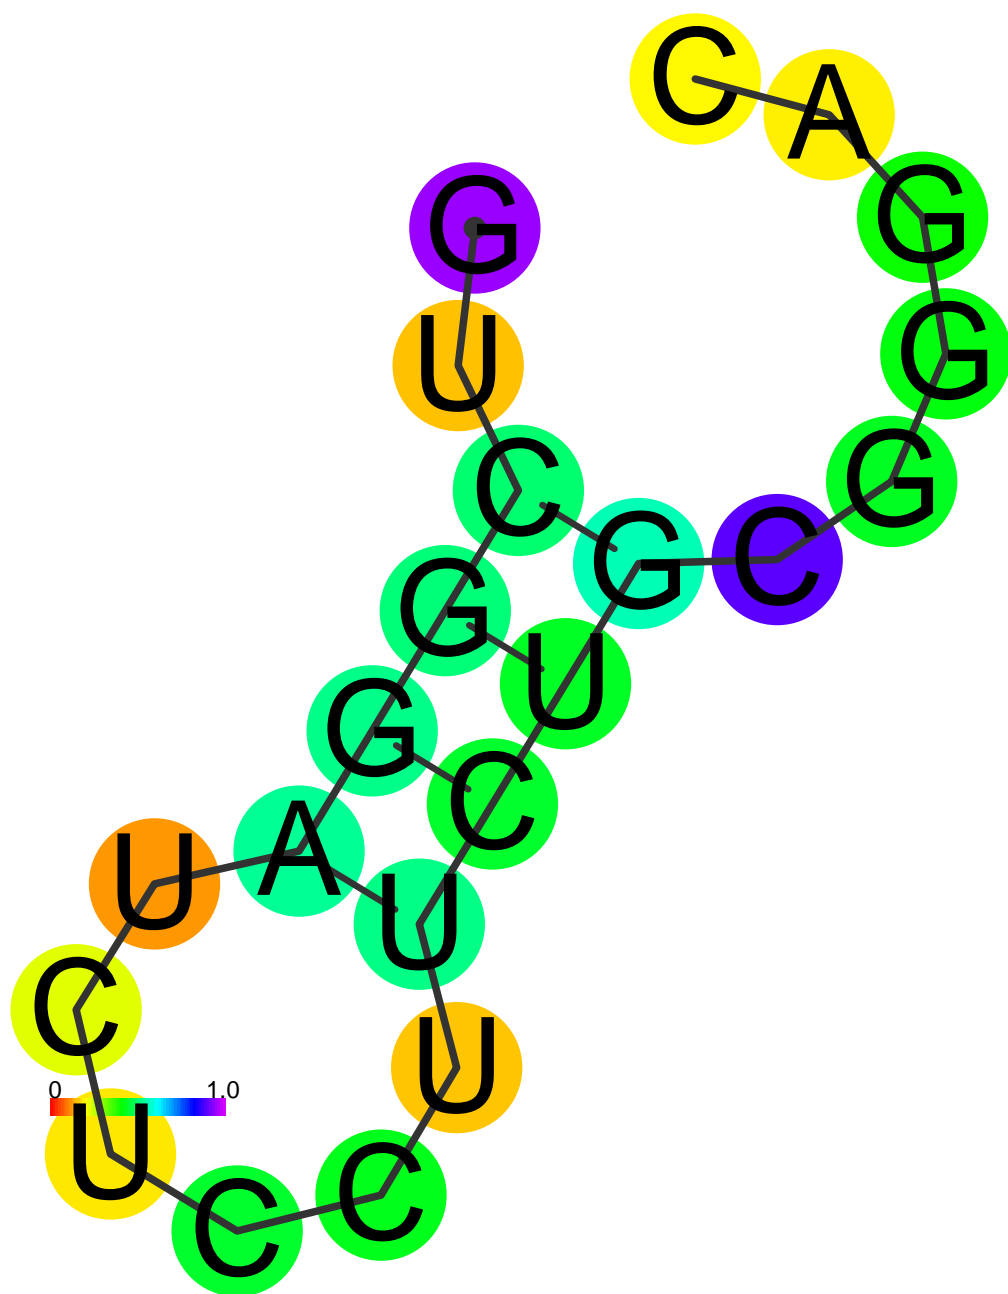

Supplement: Supplementary file 389 [file supplementary]

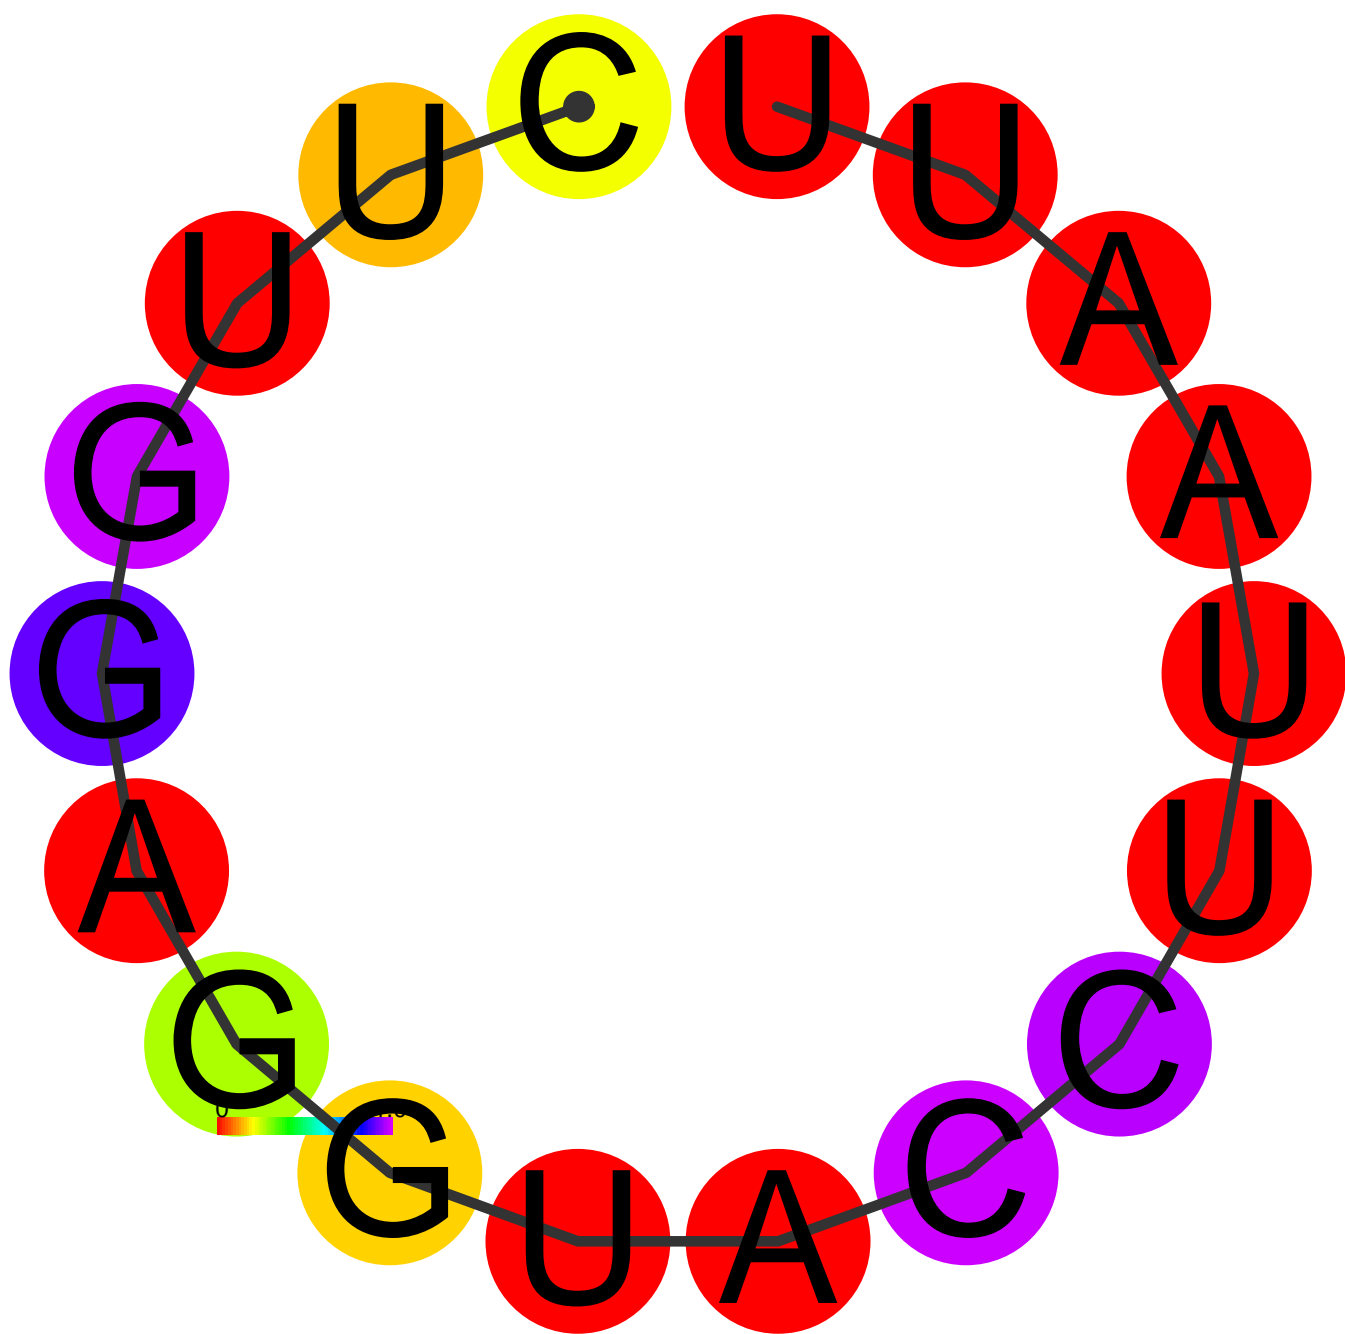

Supplement: Supplementary file 390 [file supplementary]

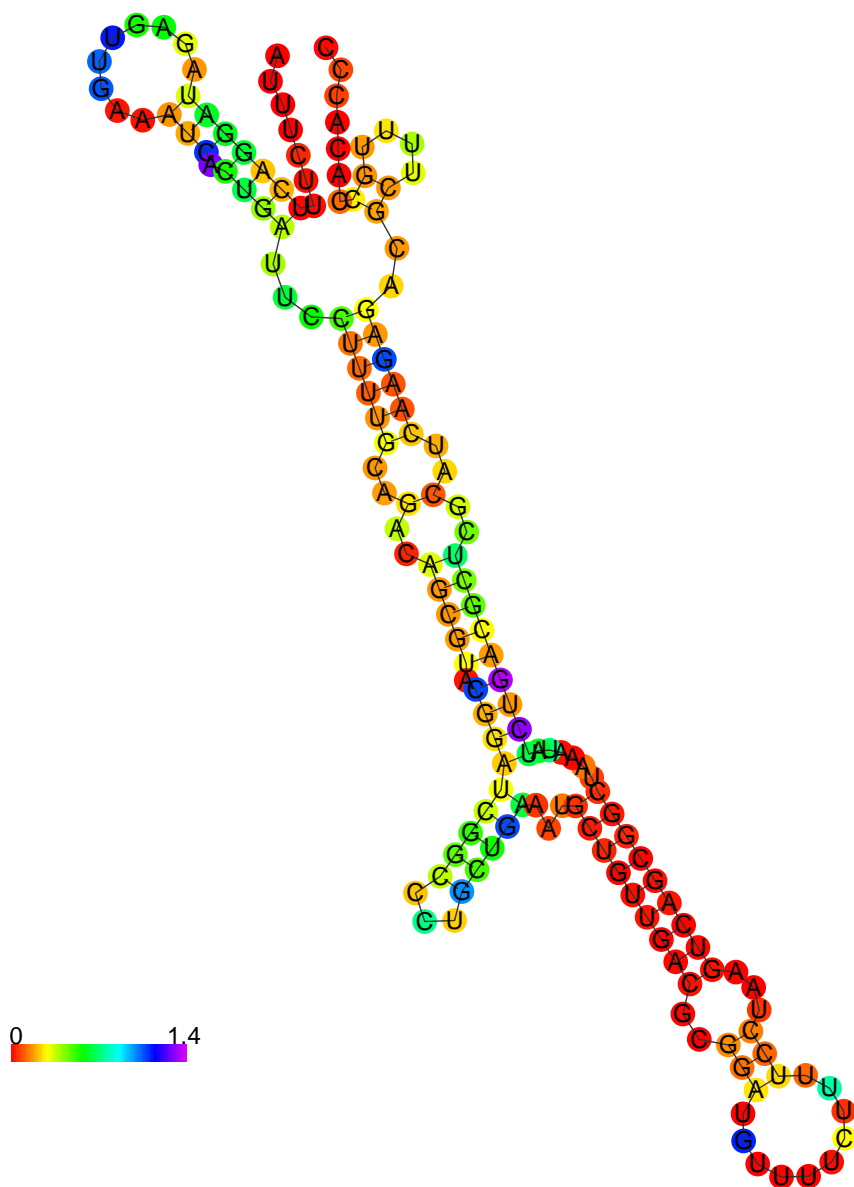

Supplement: Supplementary file 391 [file supplementary]

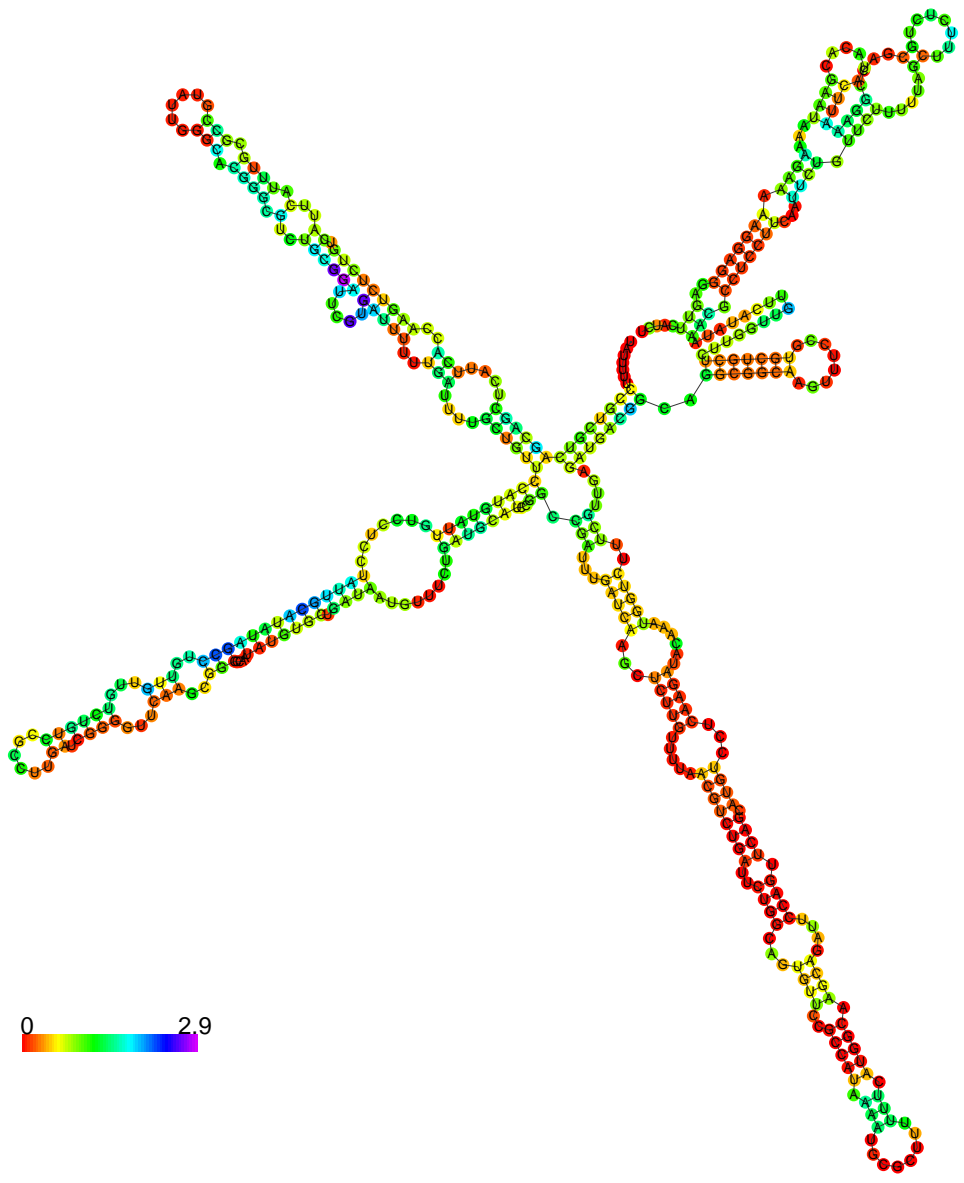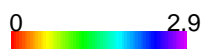

Supplement: Supplementary file 392 [file supplementary]

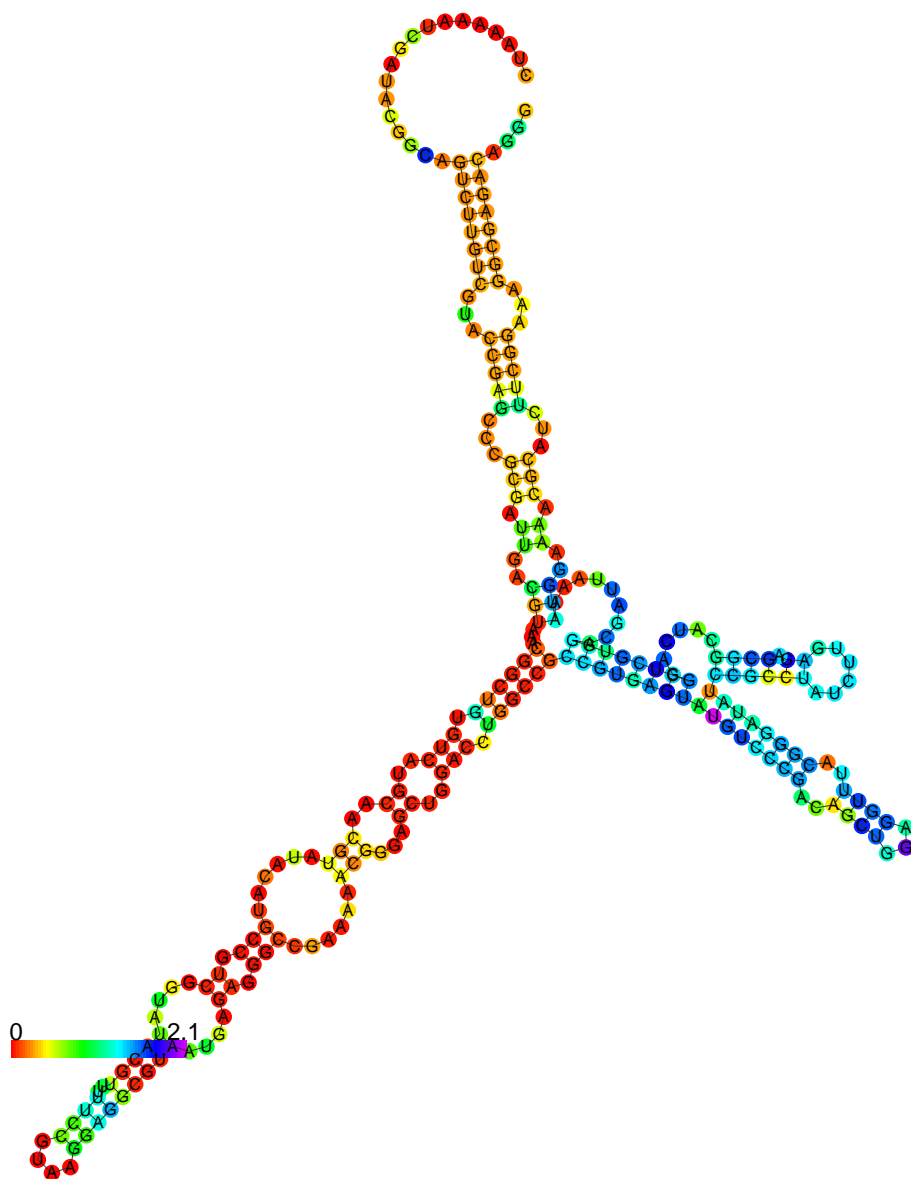

Supplement: Supplementary file 393 [file supplementary]

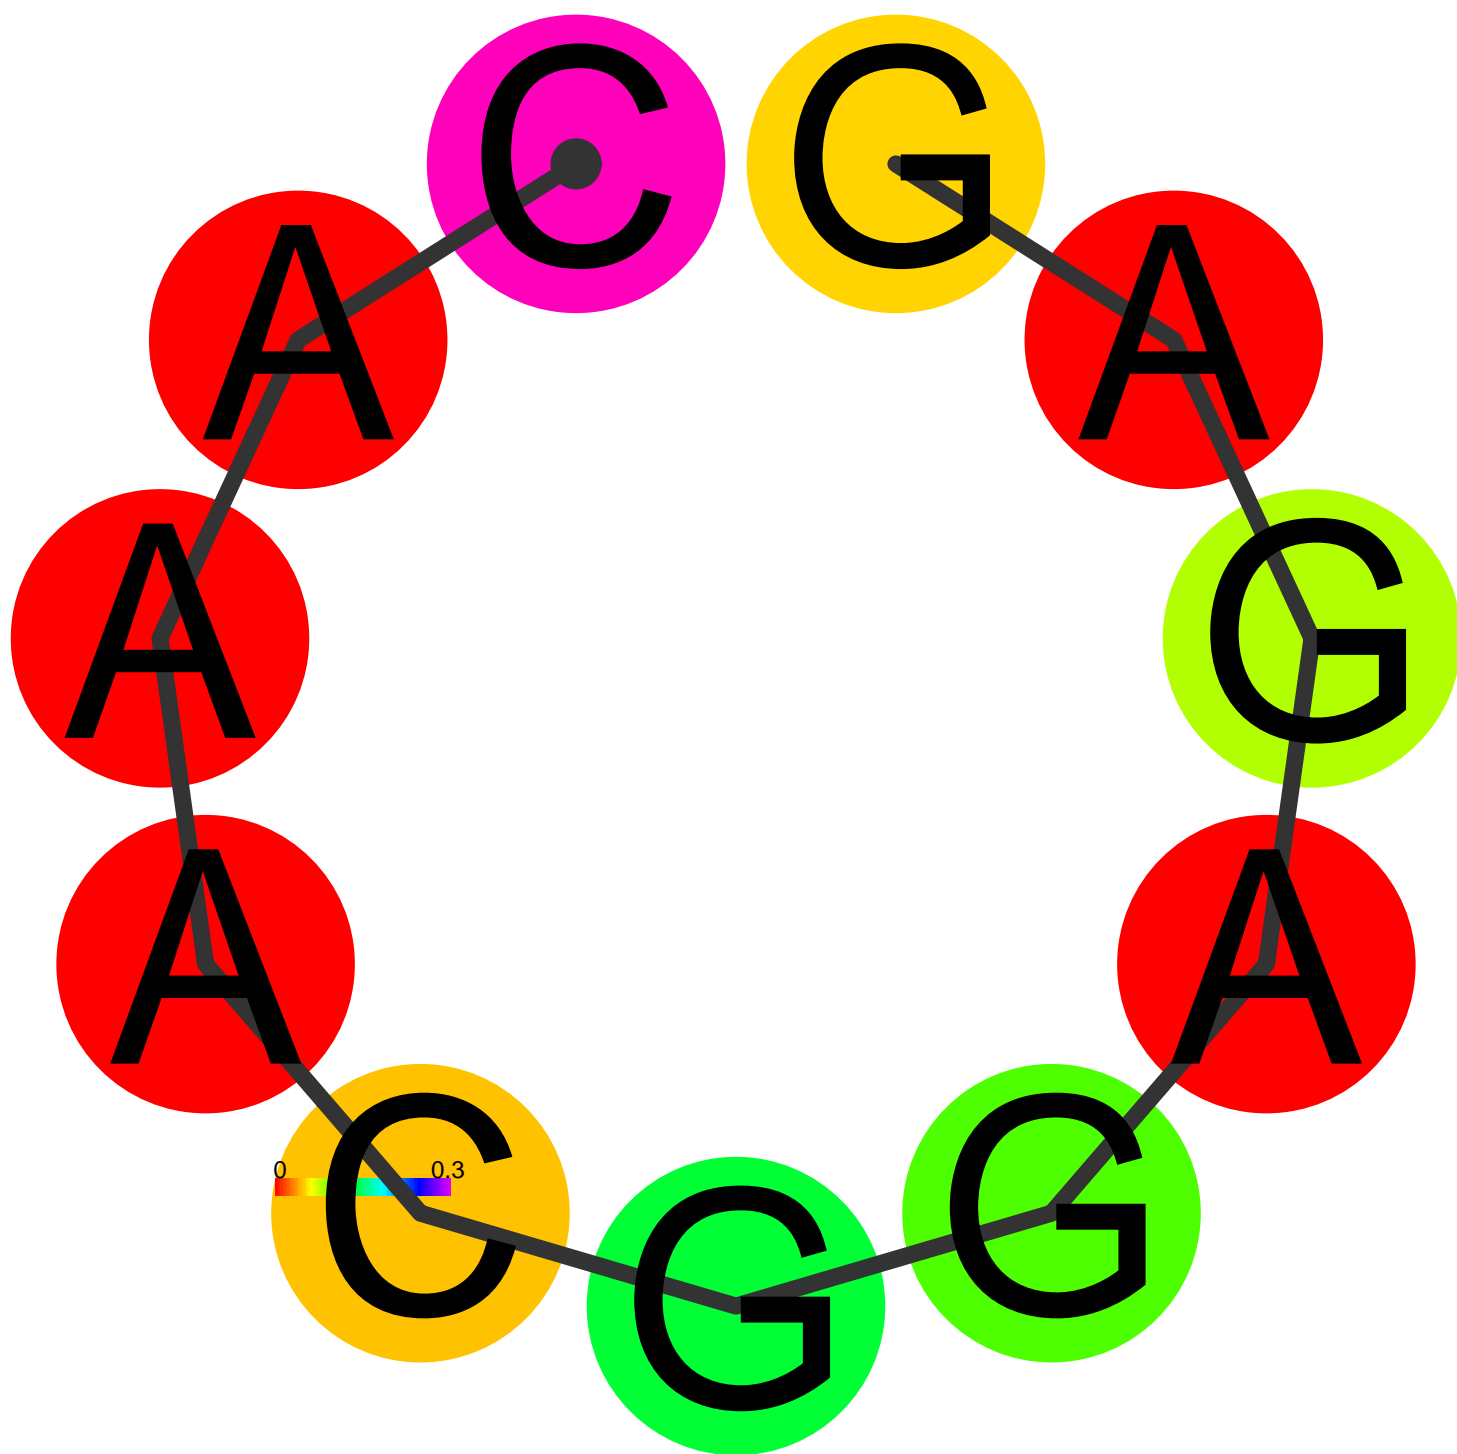

Supplement: Supplementary file 394 [file supplementary]

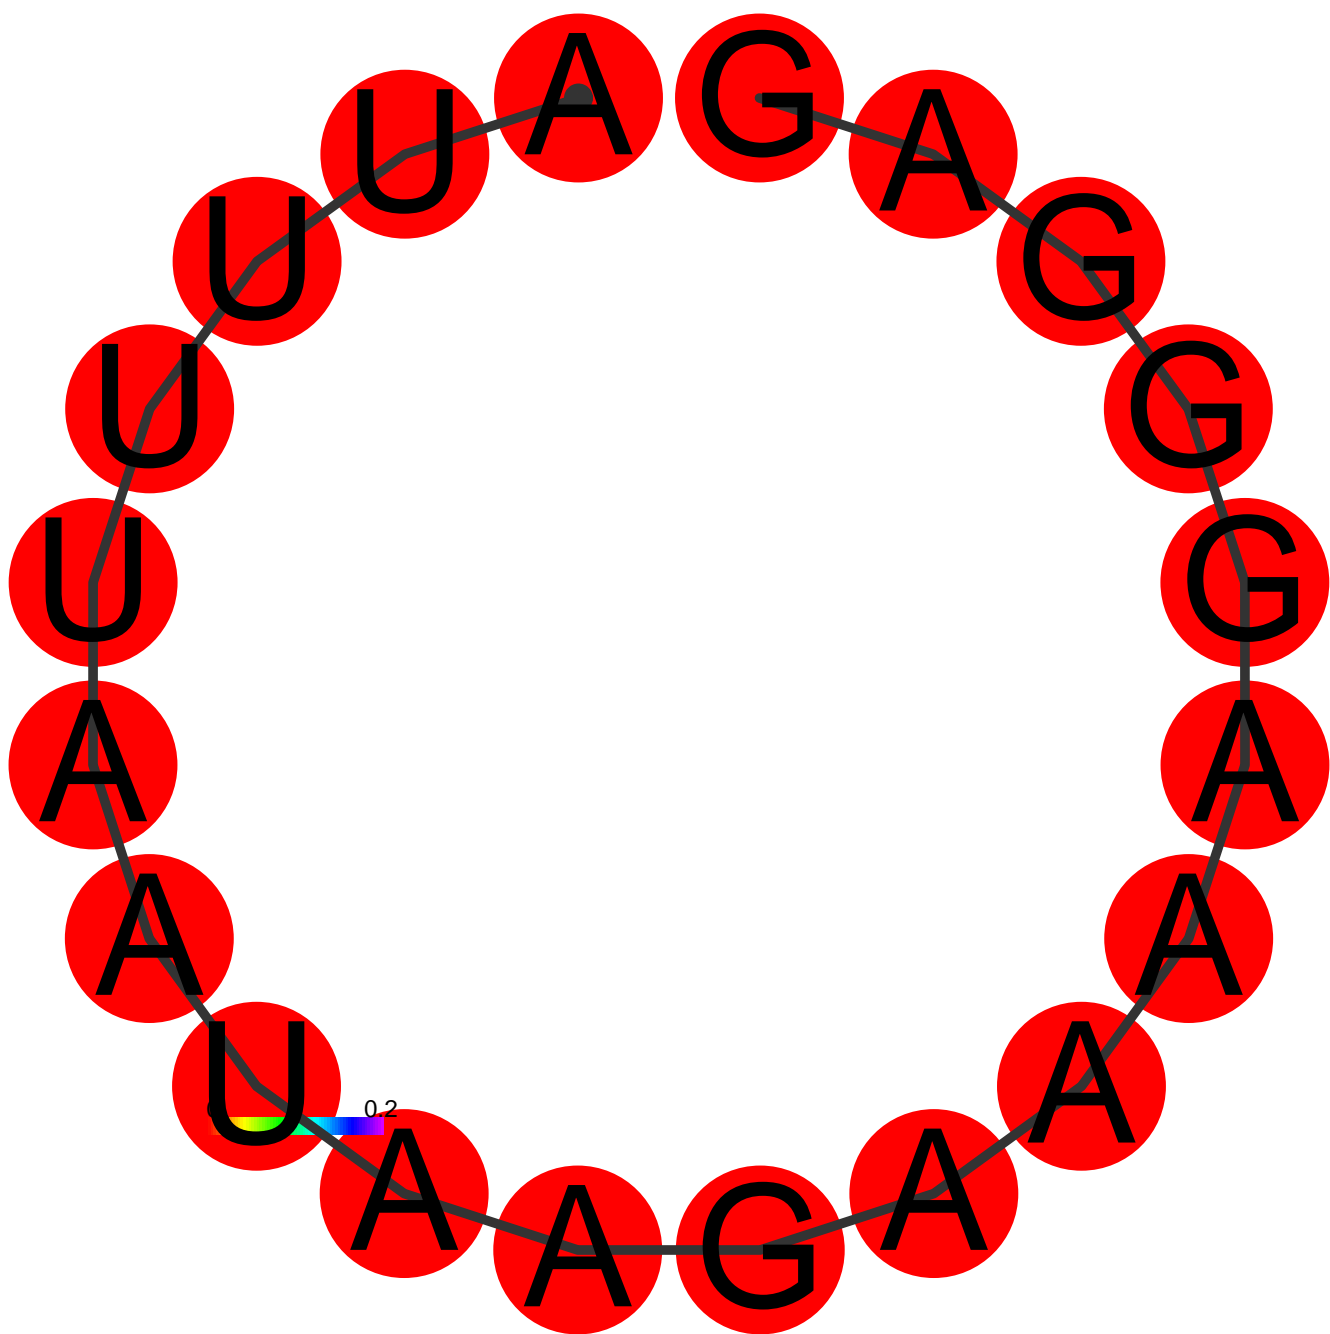

Supplement: Supplementary file 395 [file supplementary]

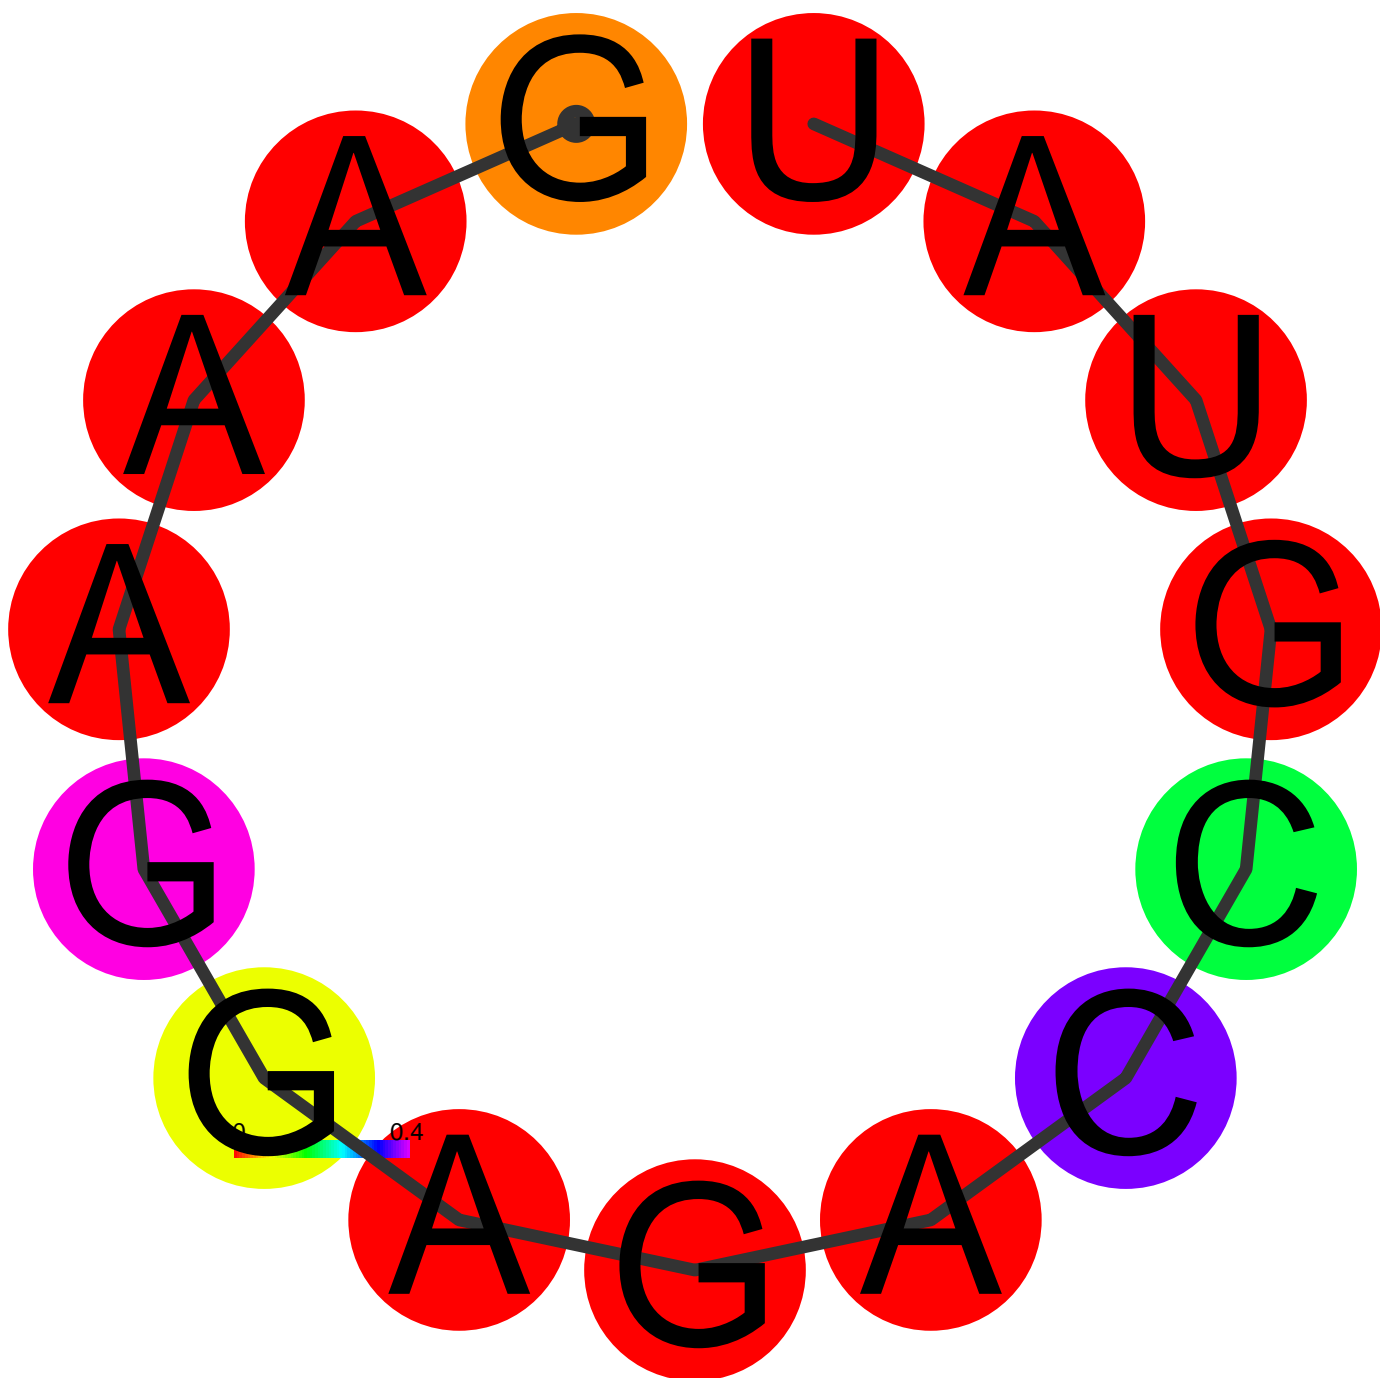

Supplement: Supplementary file 396 [file supplementary]

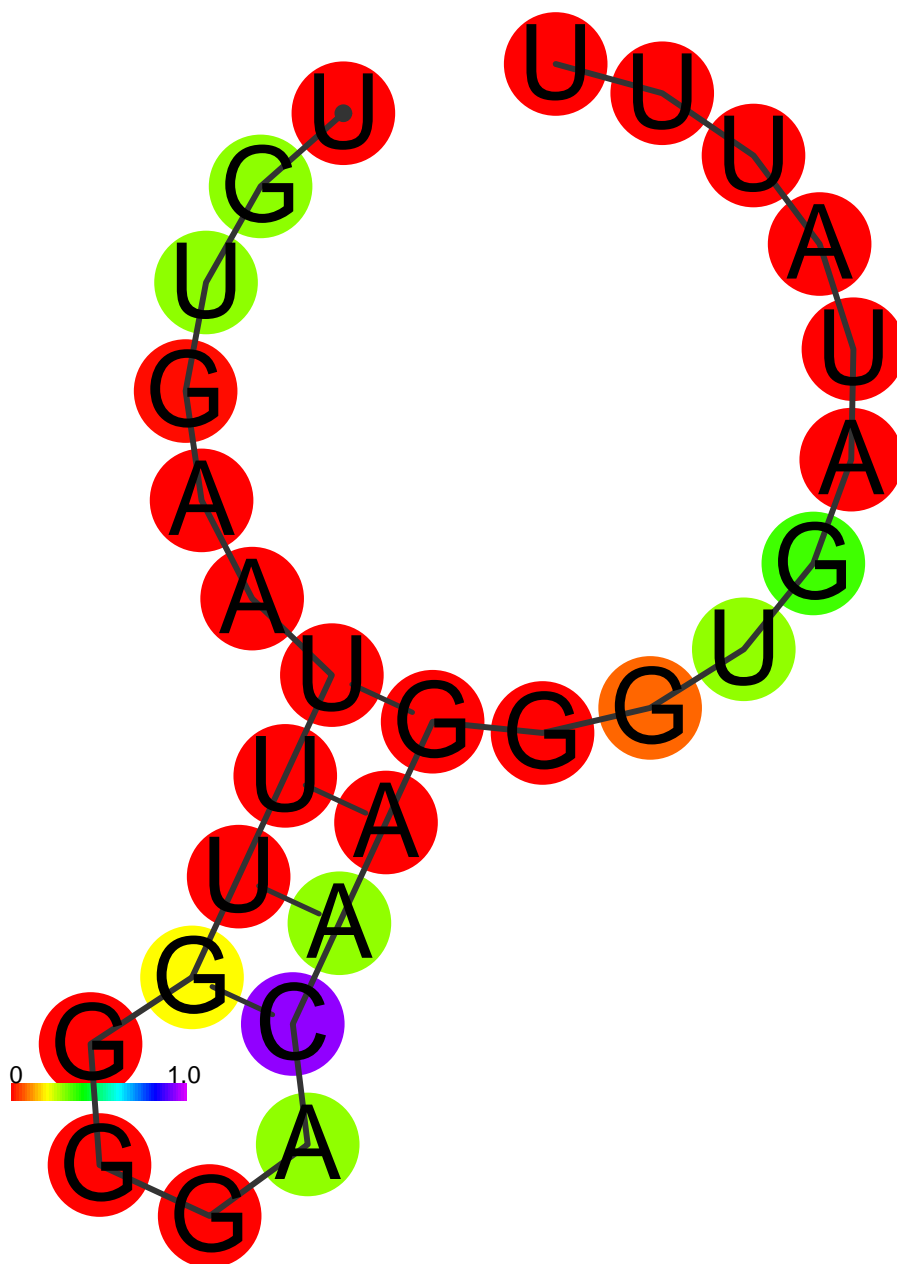

Supplement: Supplementary file 397 [file supplementary]

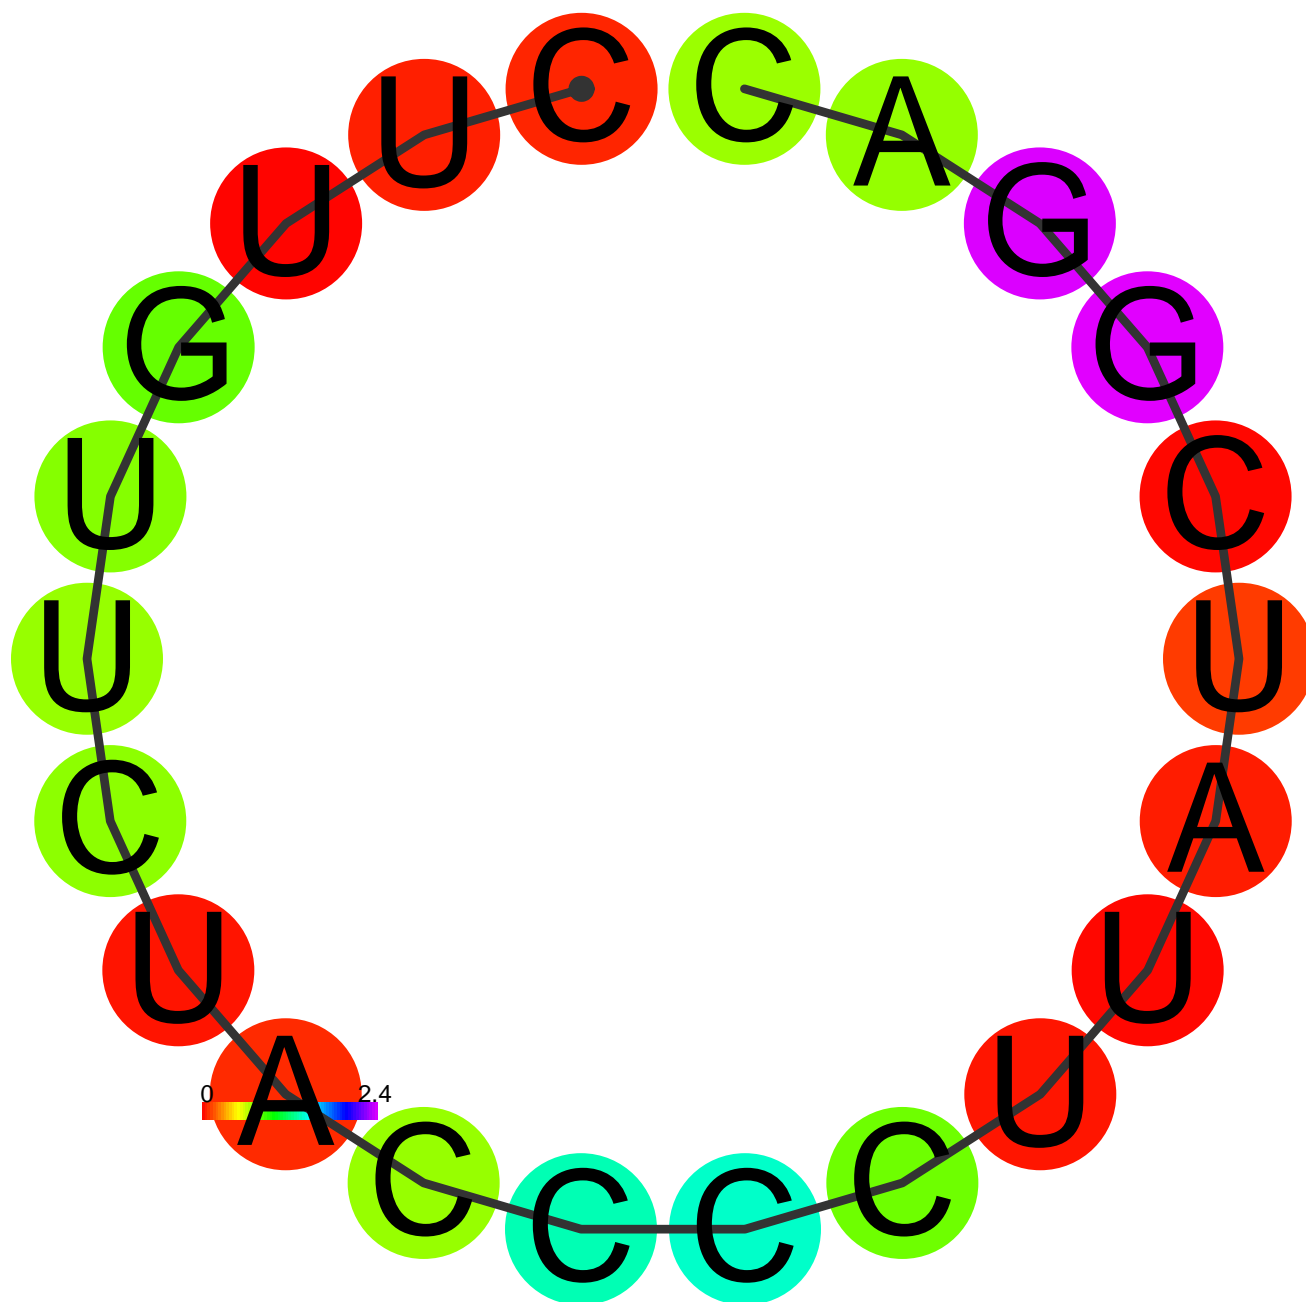

Supplement: Supplementary file 398 [file supplementary]

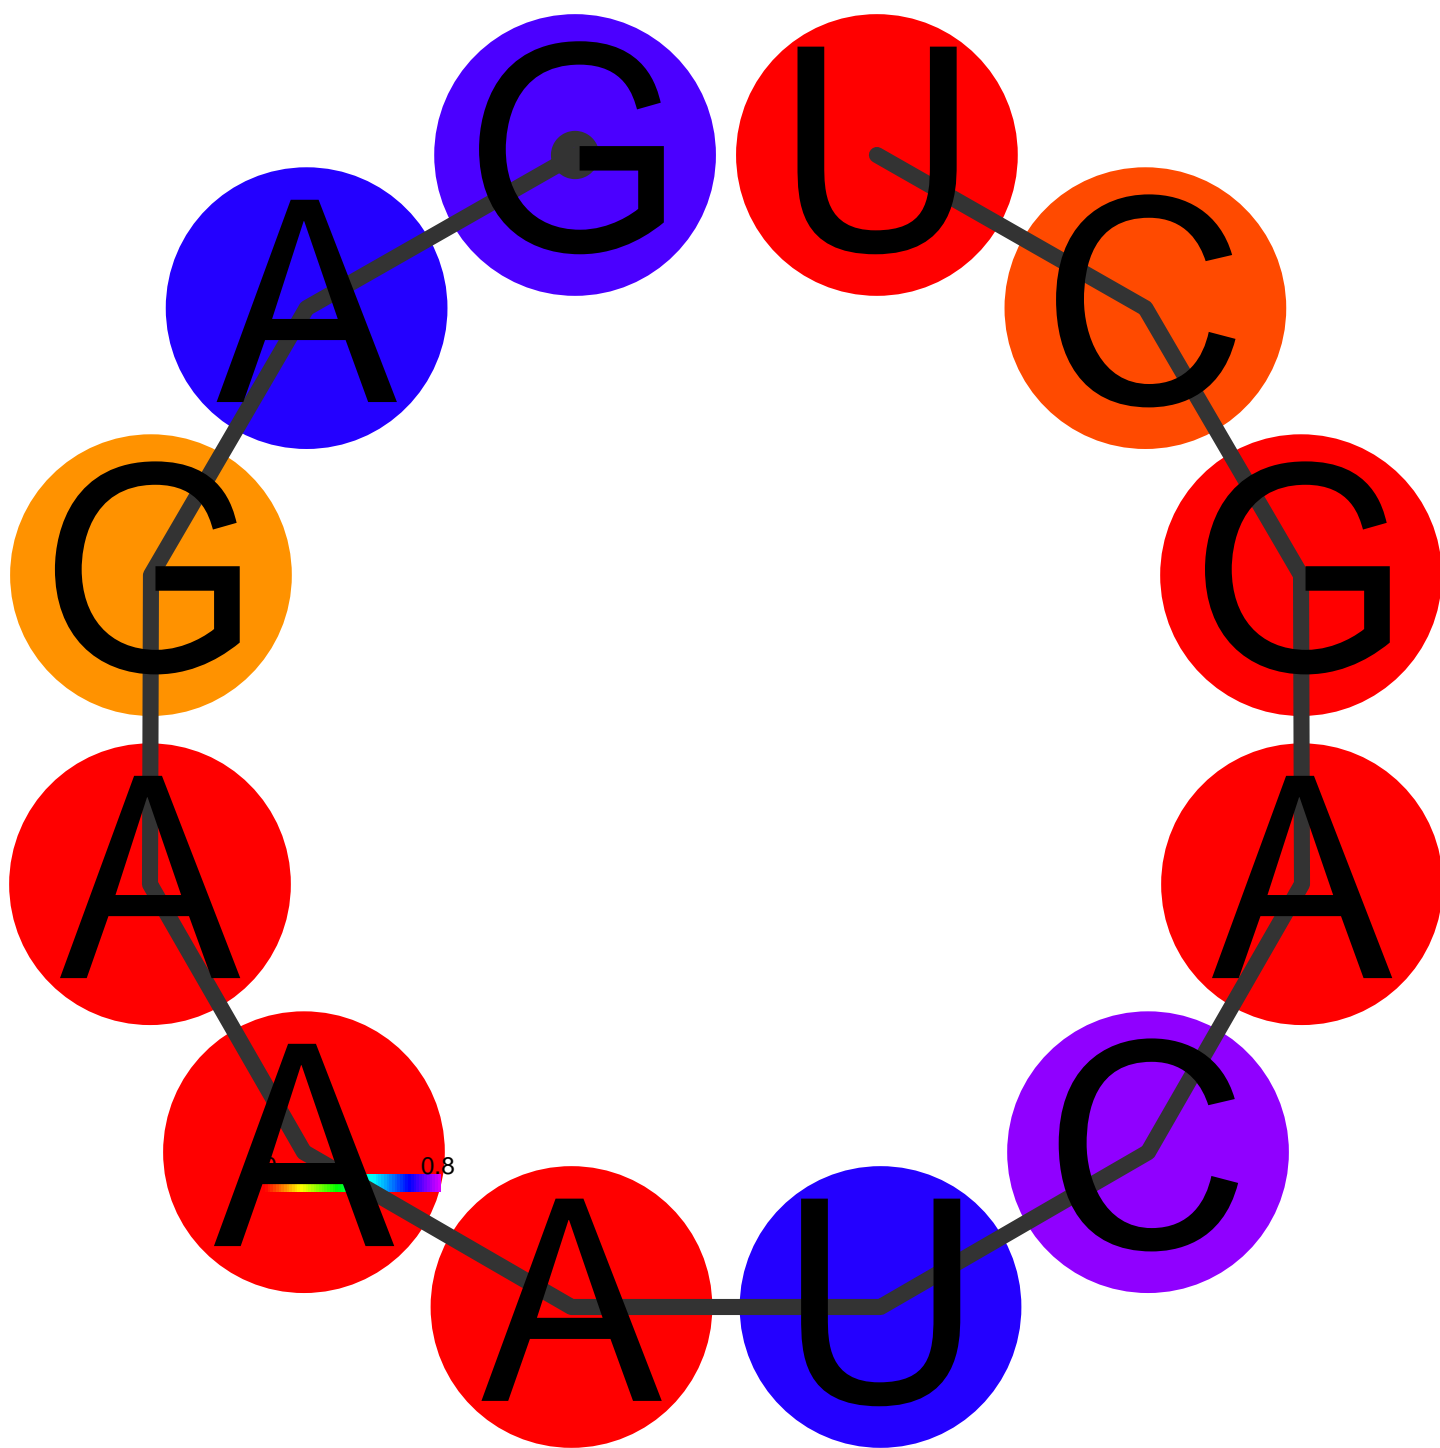

Supplement: Supplementary file 399 [file supplementary]

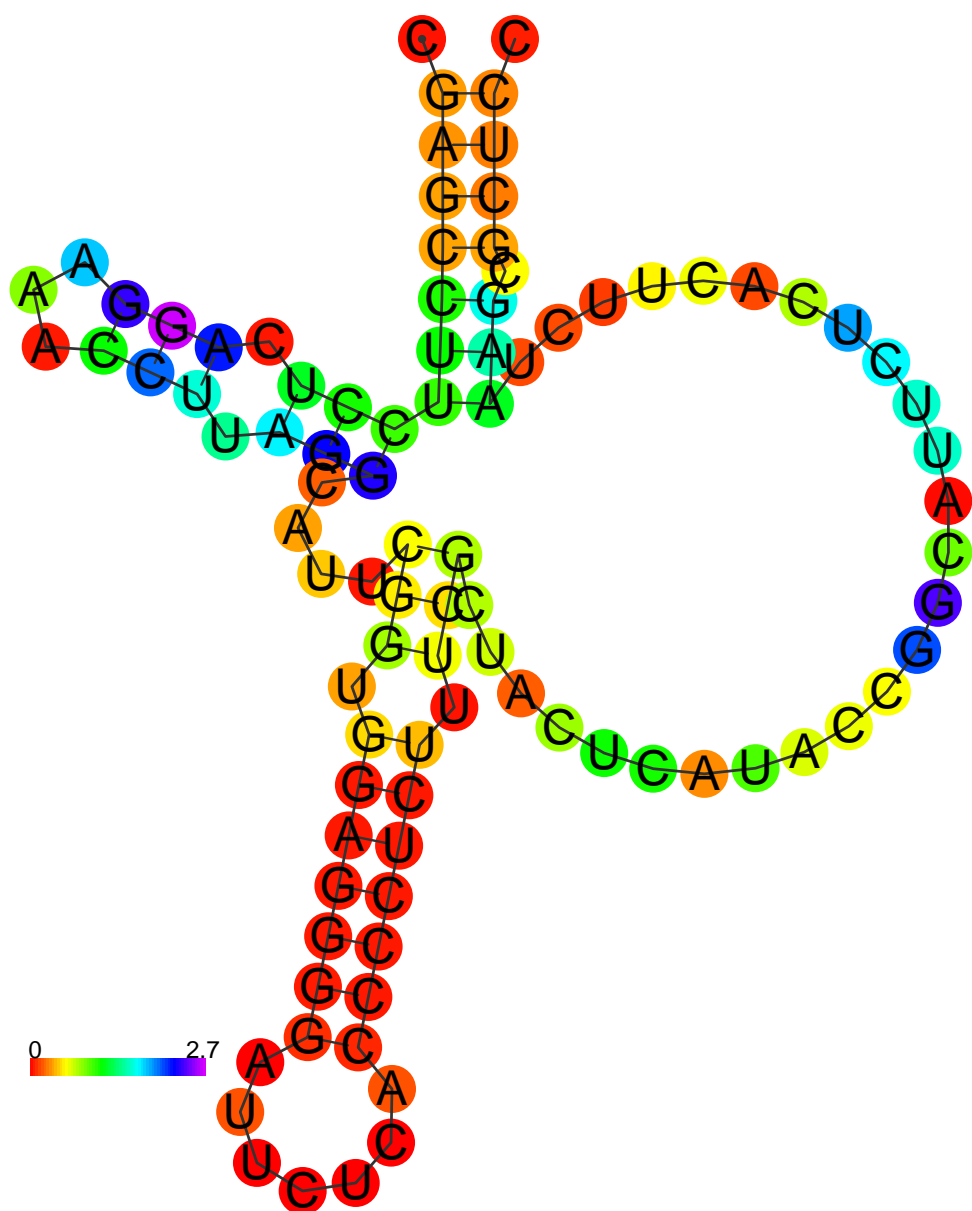

Supplement: Supplementary file 400 [file supplementary]
