# Supplementary figures and images for: Understanding the Effect of Different Glucose Concentrations in the Oligotrophic Bacterium Bacillus subtilis BS-G1 through Transcriptomics Analysis (part 5 of 6)
Source: Preprints.org preprint supplement (doi:10.20944/preprints202308.1891.v1), 2023-08-29

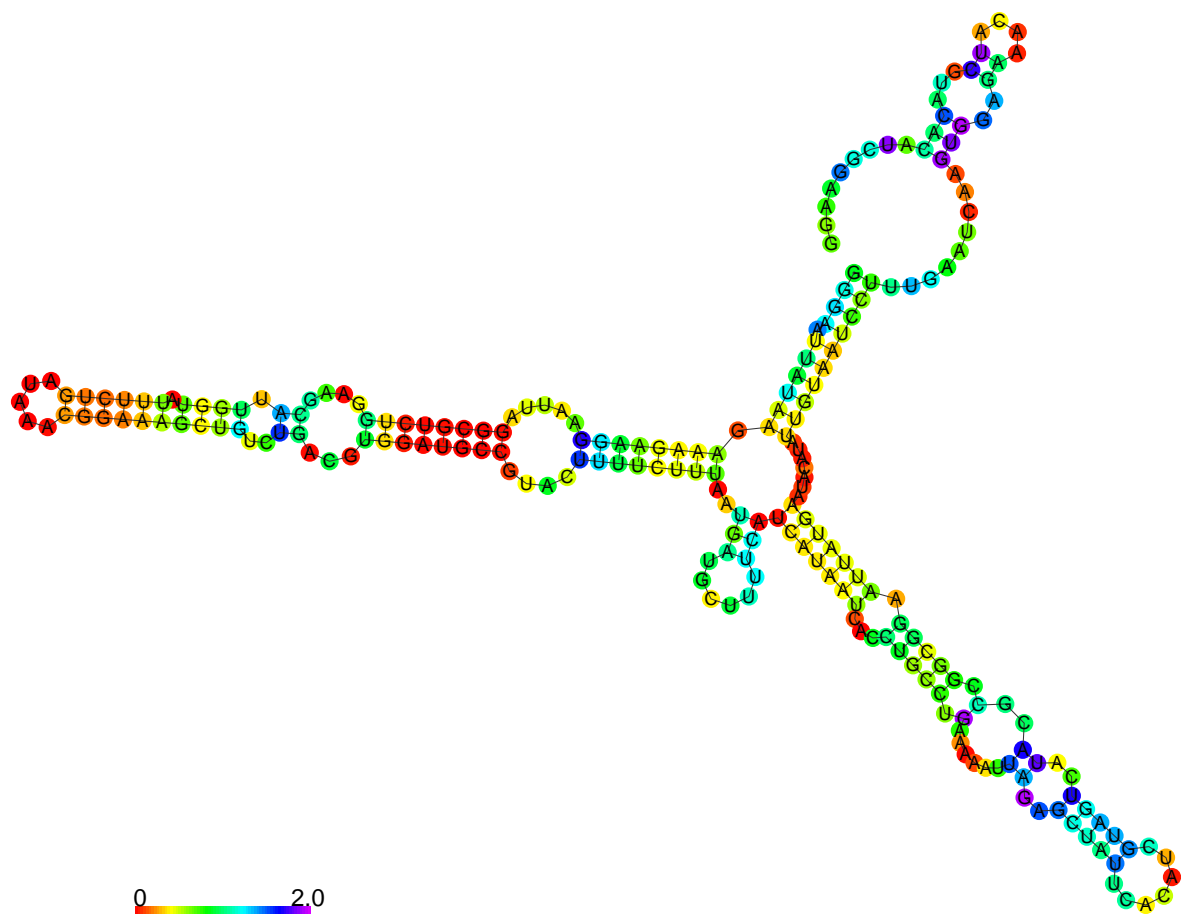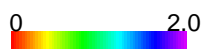

Supplement: Supplementary file 401 [file supplementary]

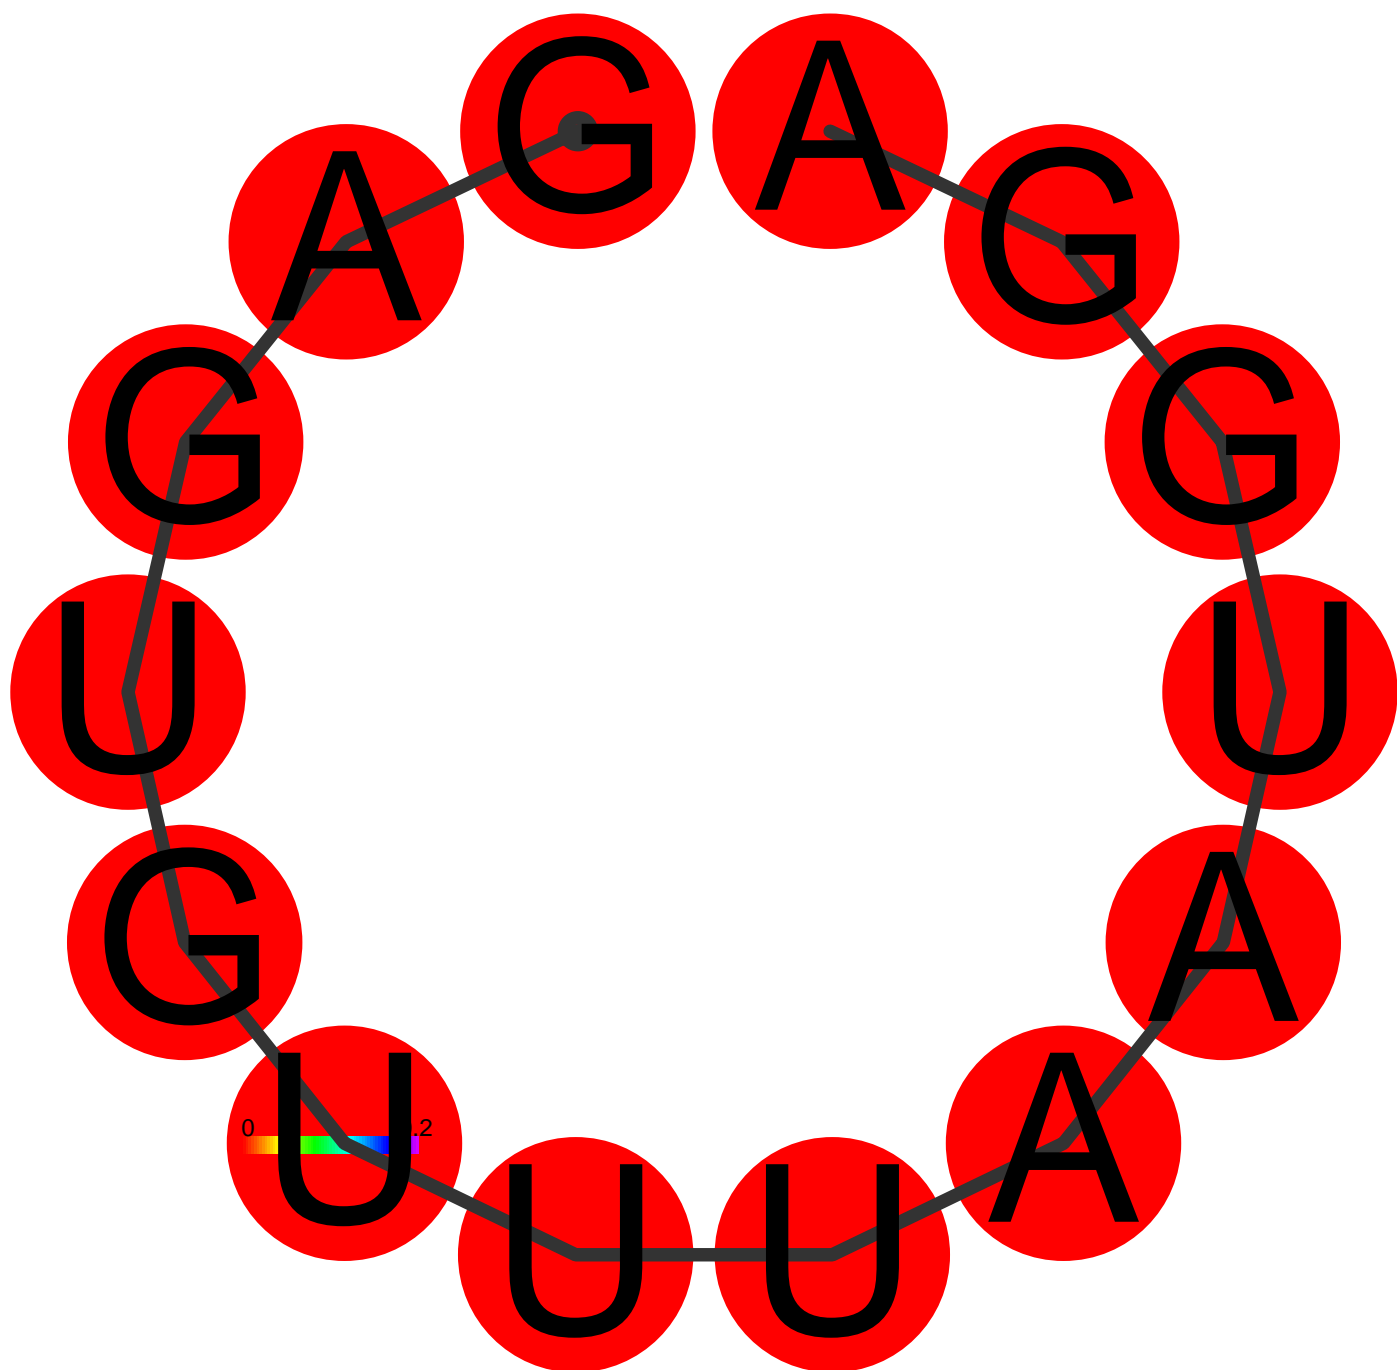

Supplement: Supplementary file 402 [file supplementary]

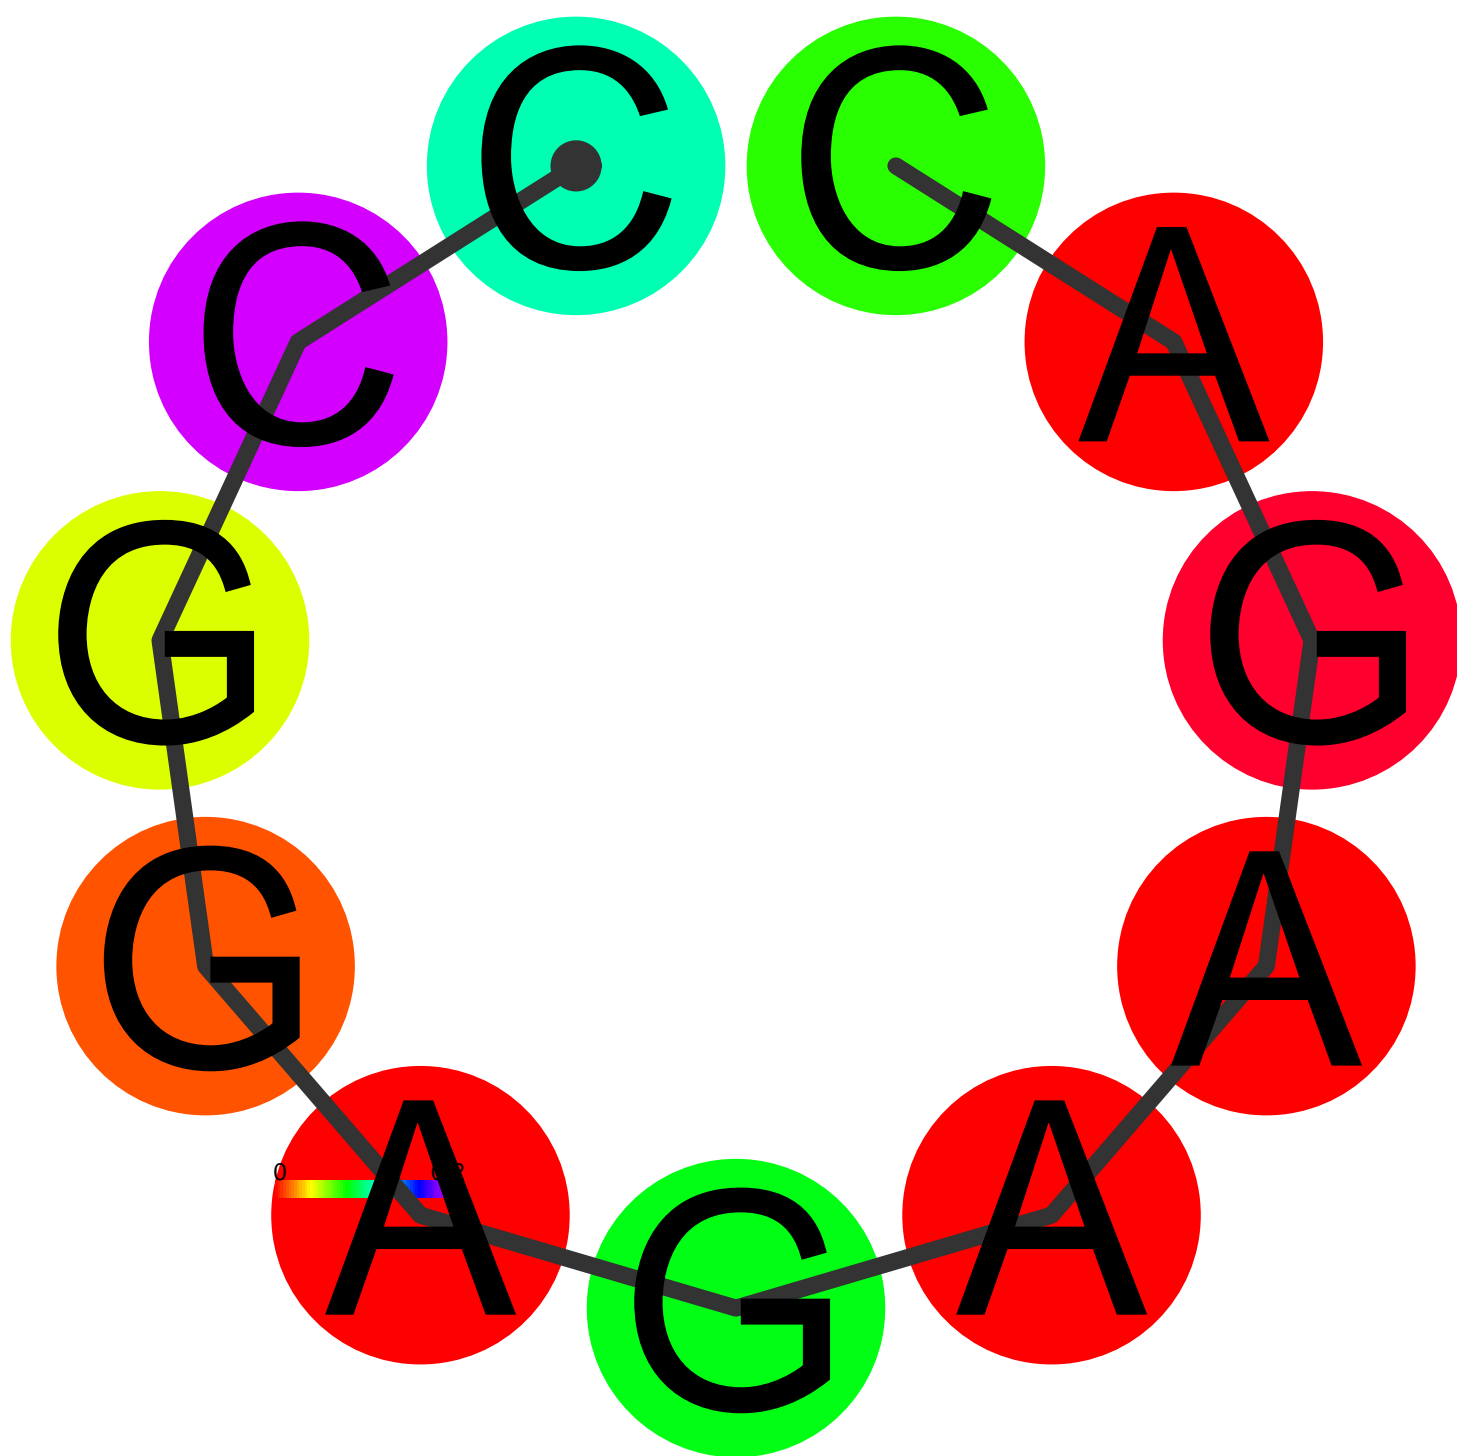

Supplement: Supplementary file 403 [file supplementary]

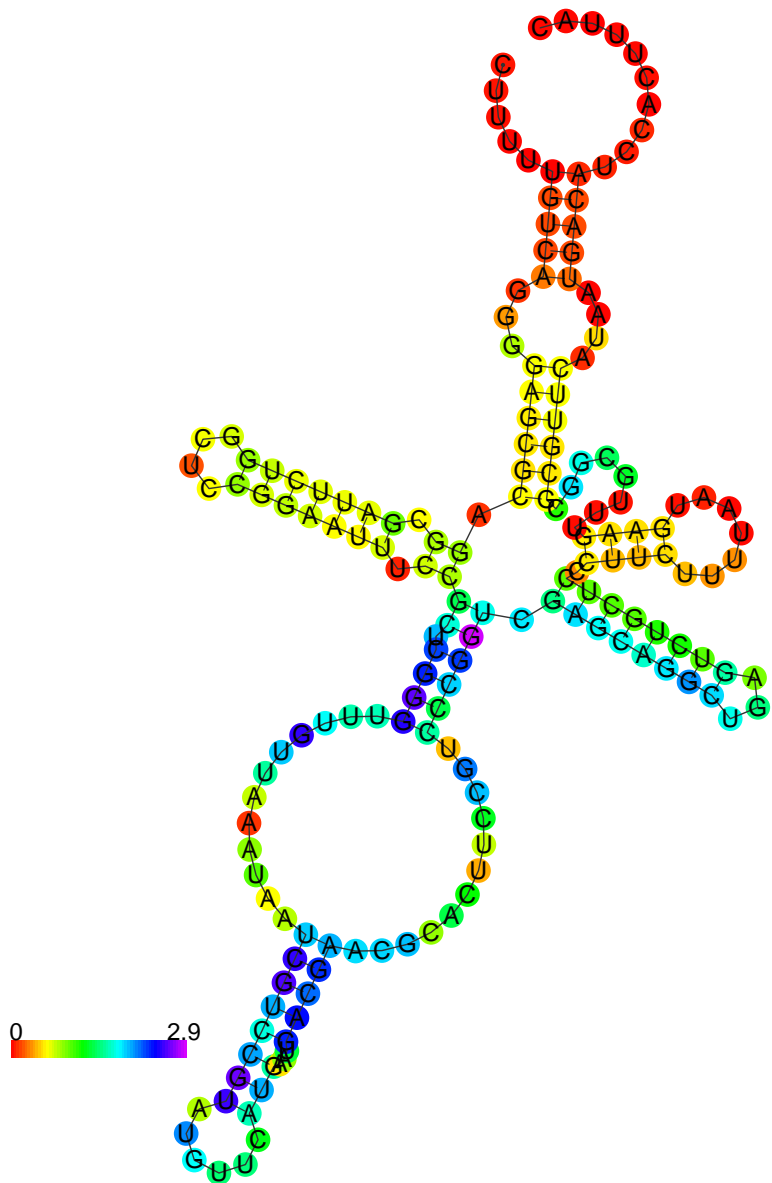

Supplement: Supplementary file 404 [file supplementary]

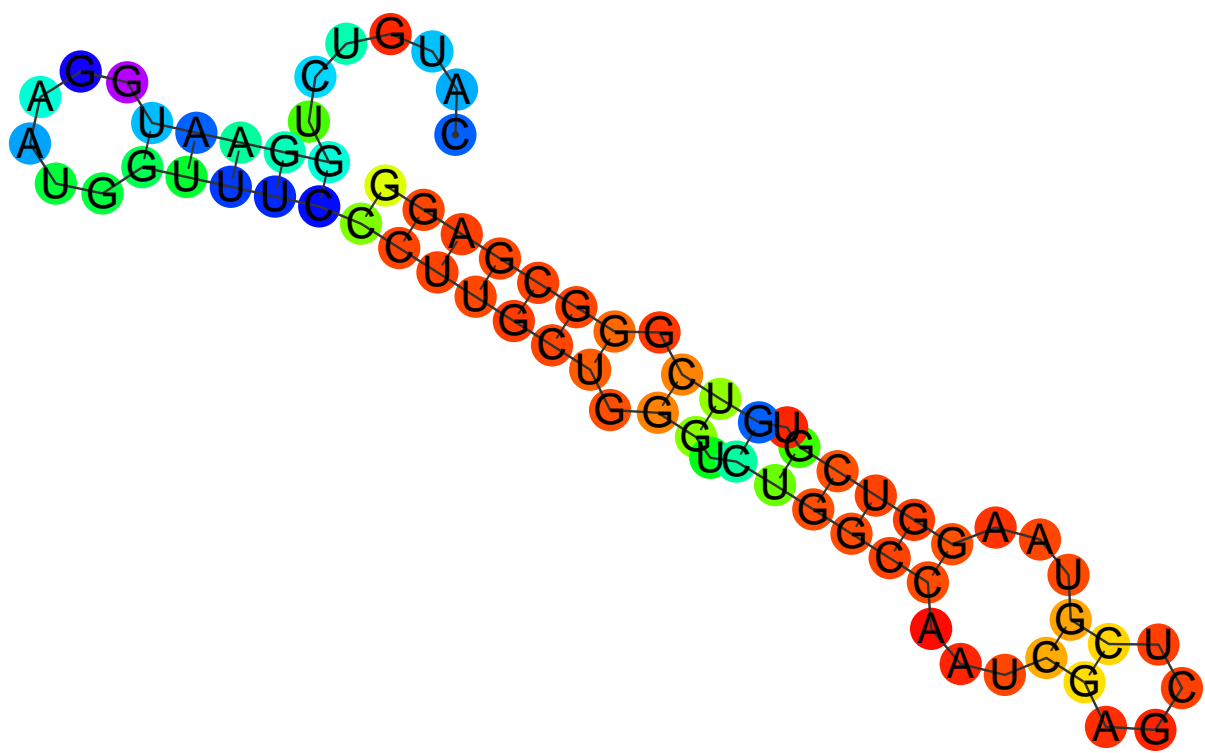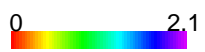

Supplement: Supplementary file 405 [file supplementary]

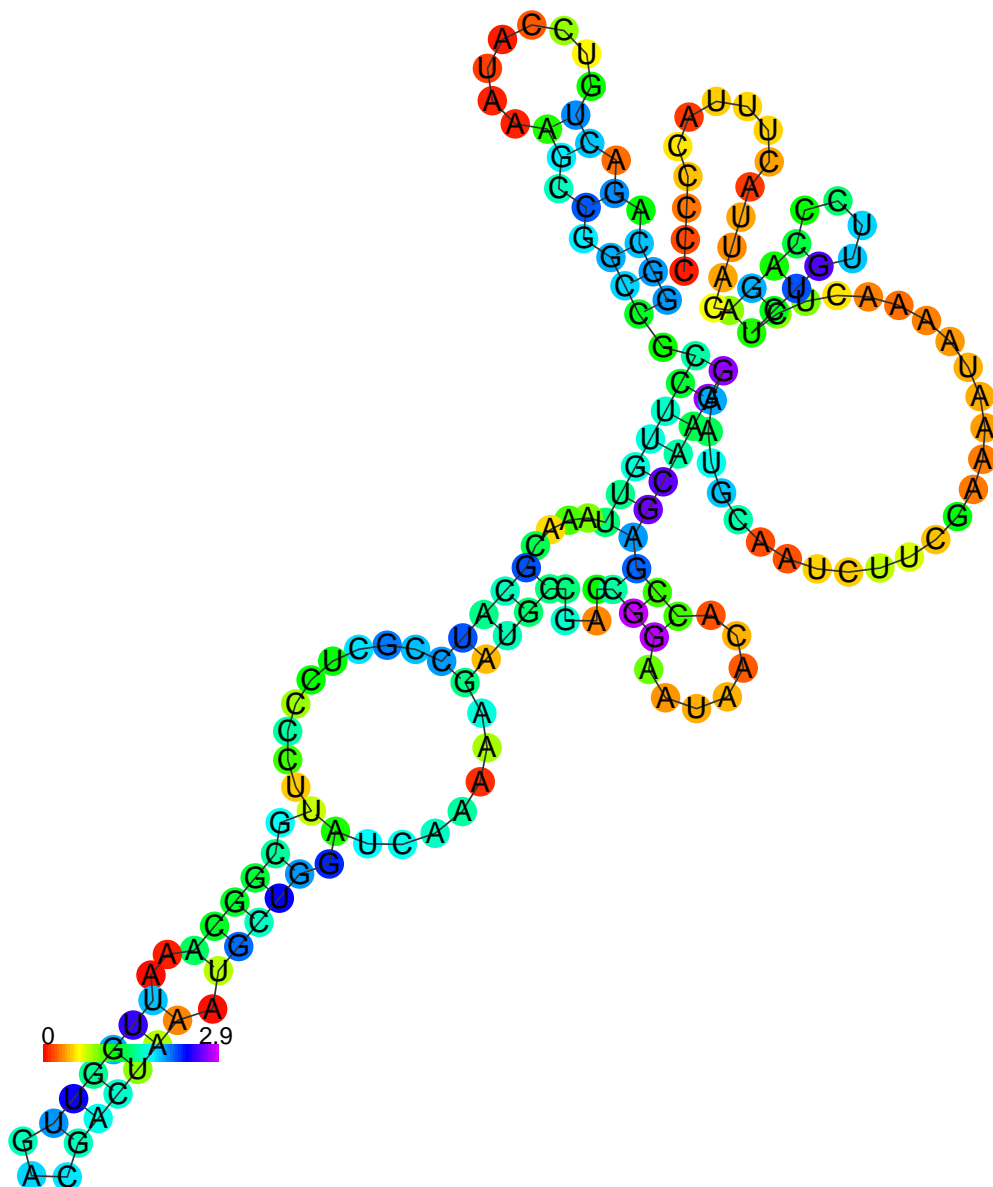

Supplement: Supplementary file 406 [file supplementary]

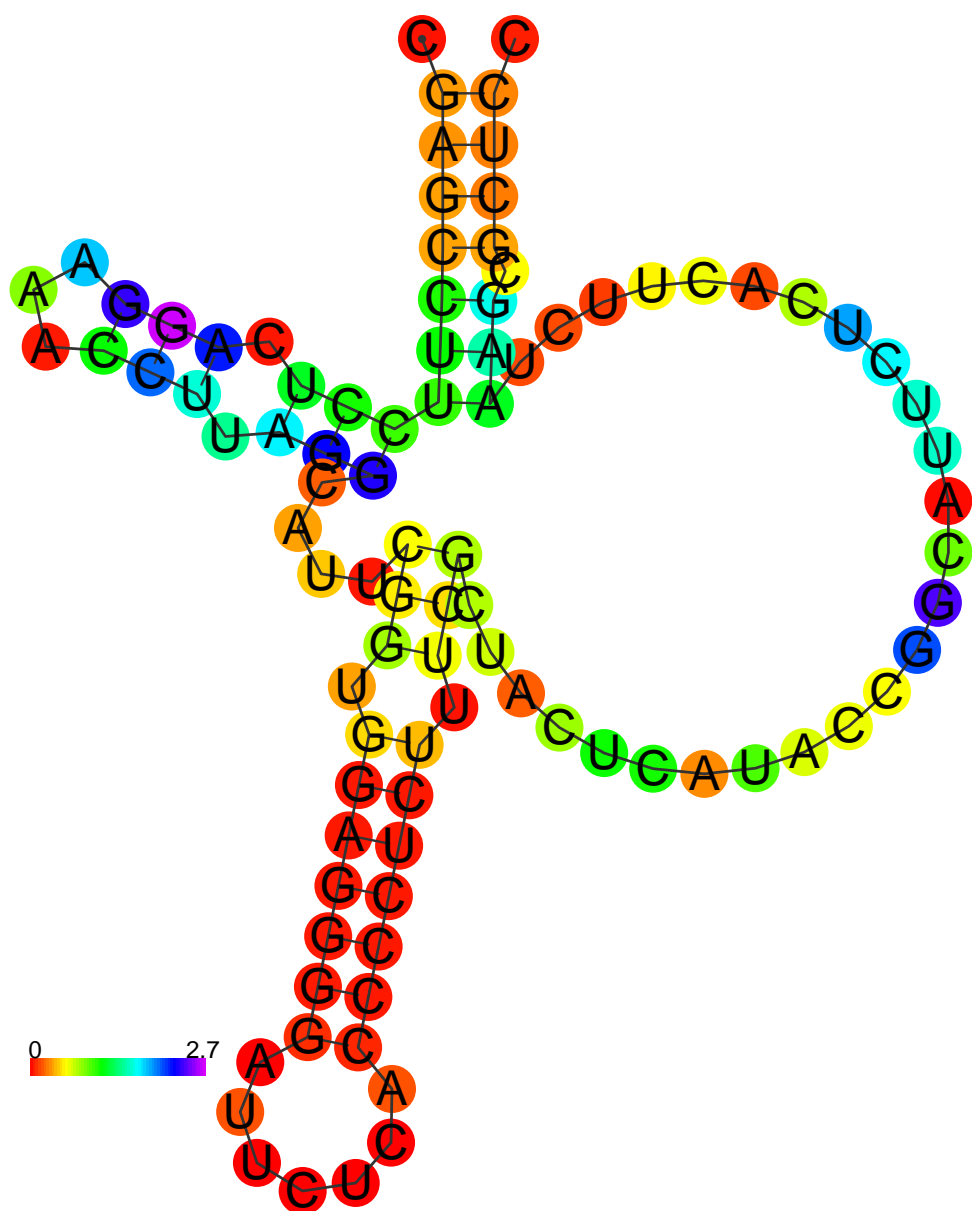

Supplement: Supplementary file 407 [file supplementary]

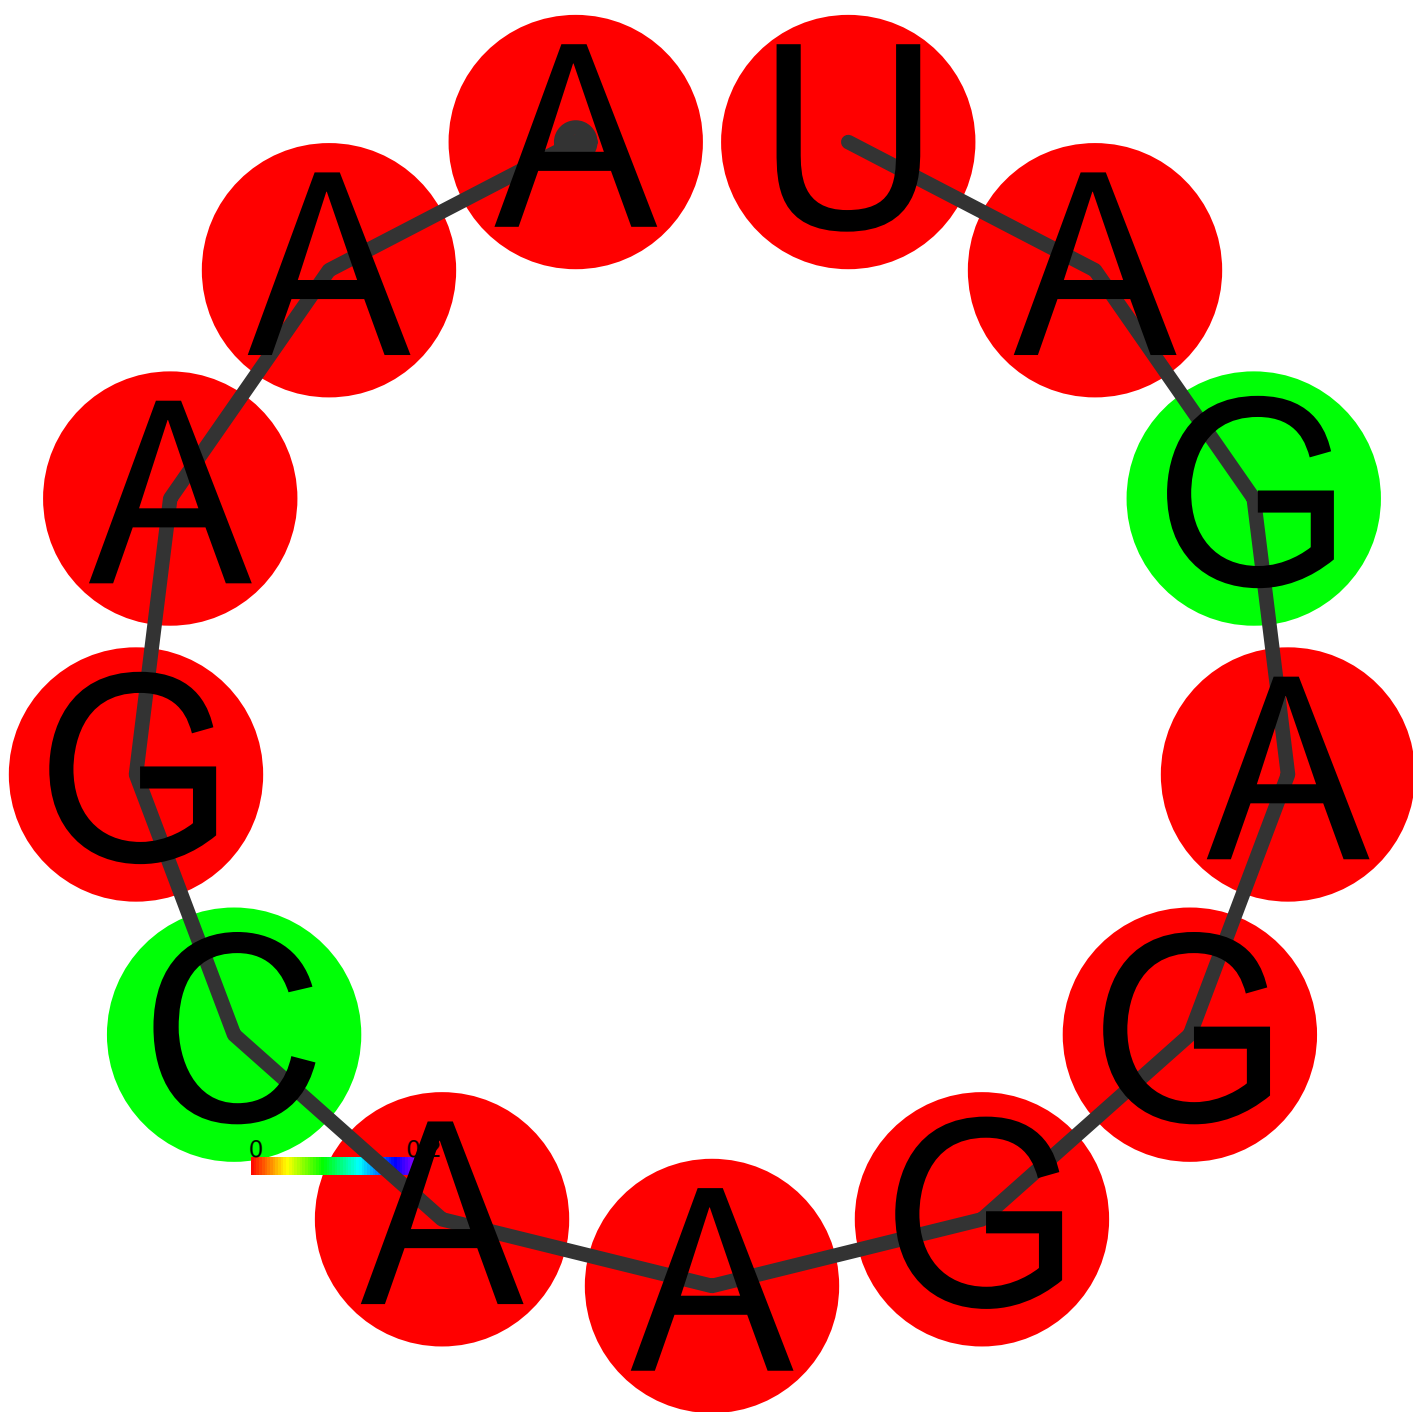

Supplement: Supplementary file 408 [file supplementary]

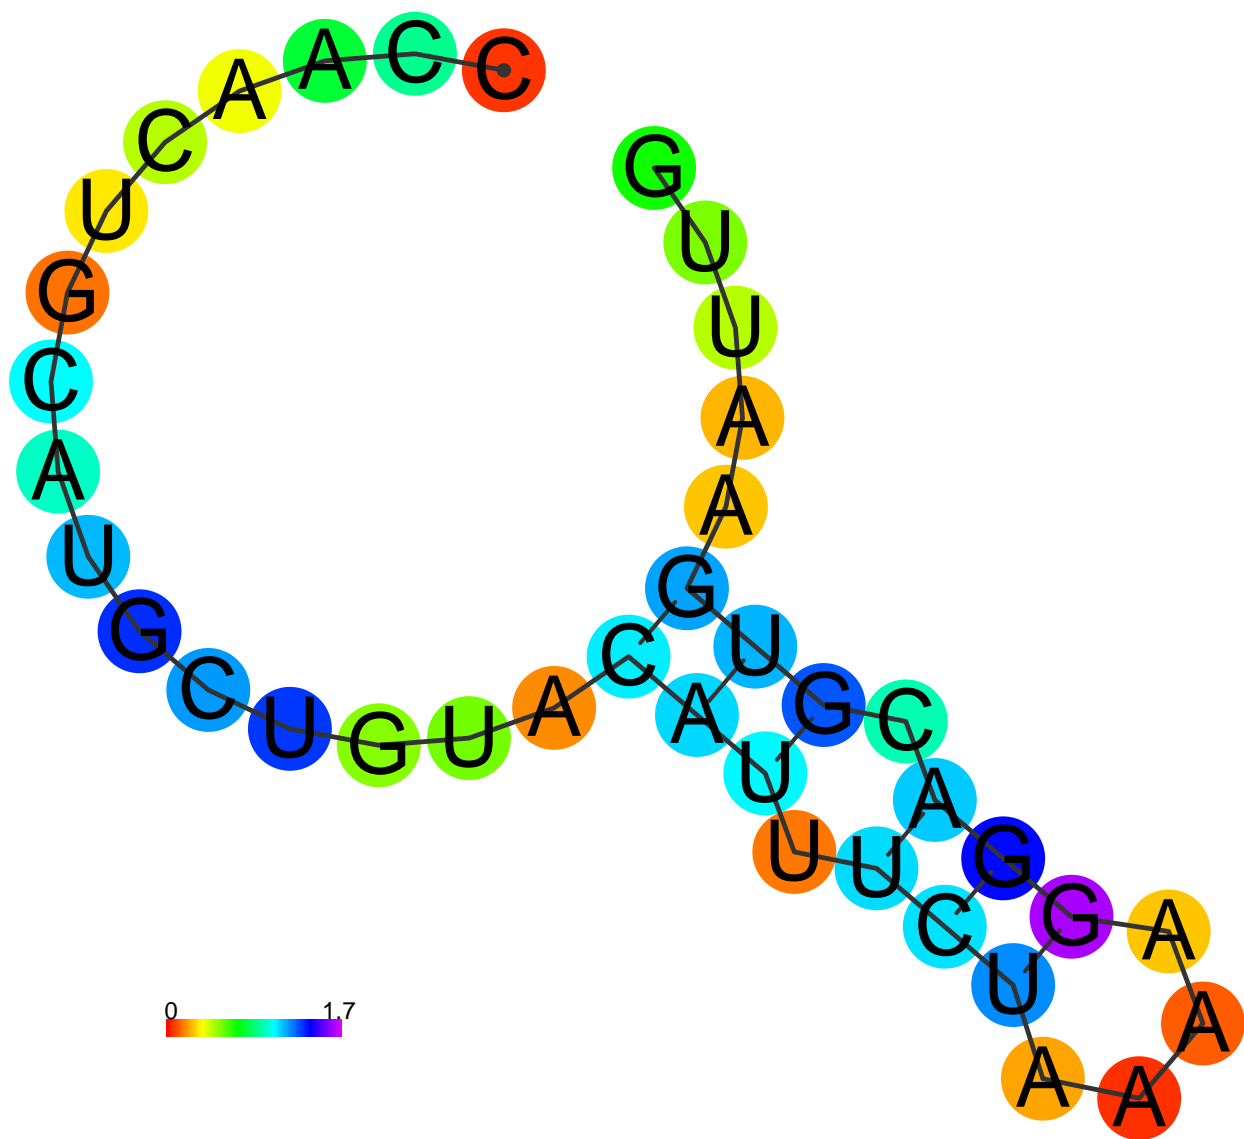

Supplement: Supplementary file 409 [file supplementary]

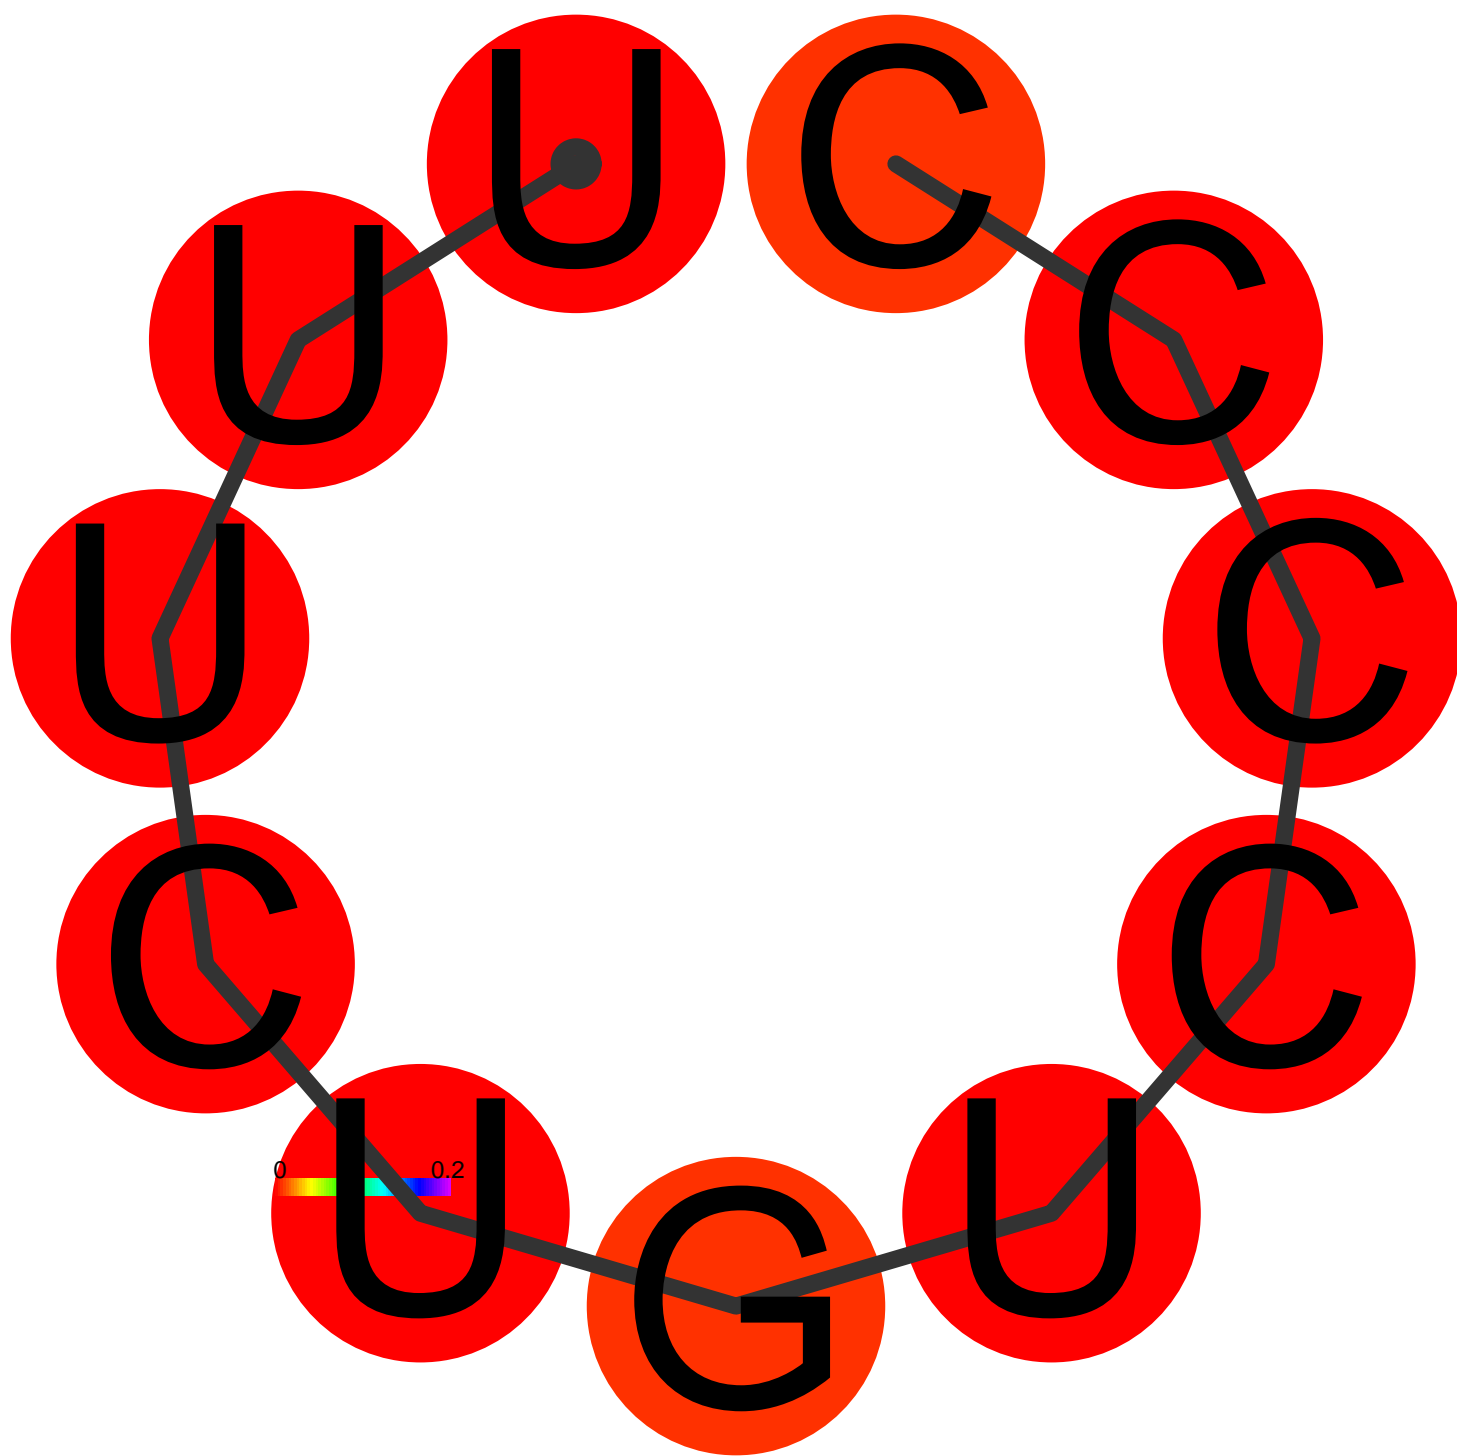

Supplement: Supplementary file 410 [file supplementary]

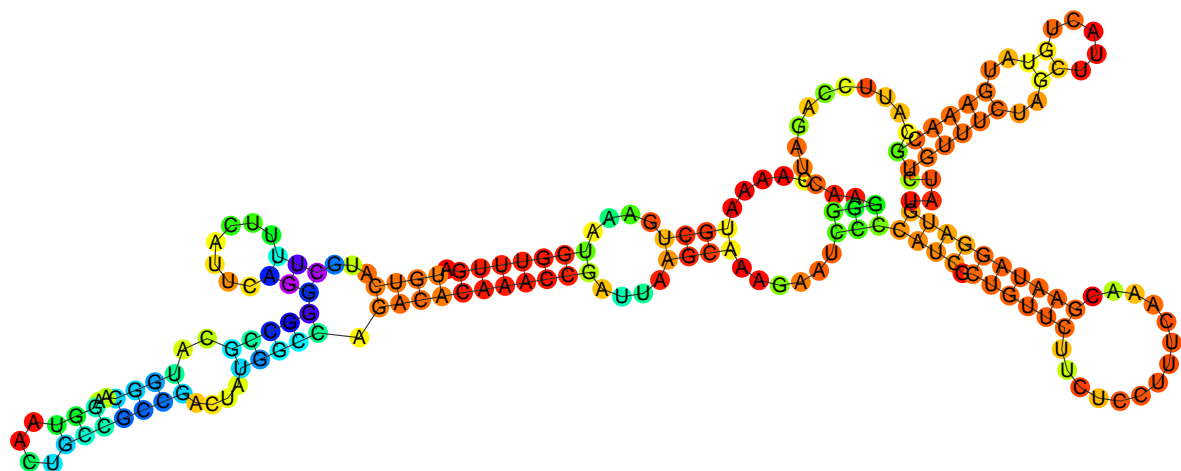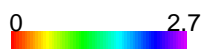

Supplement: Supplementary file 411 [file supplementary]

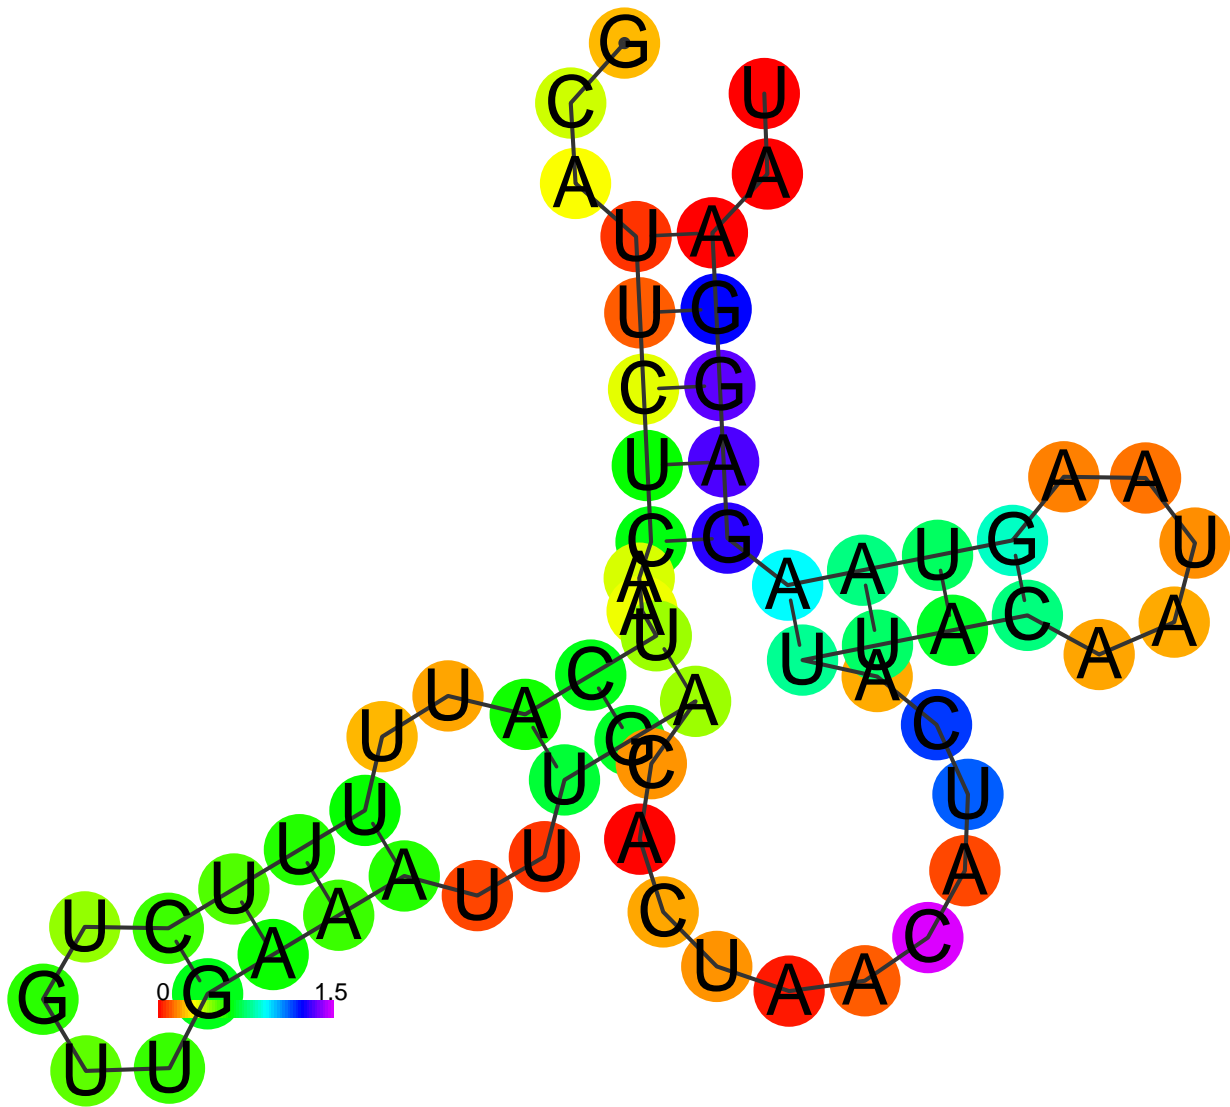

Supplement: Supplementary file 412 [file supplementary]

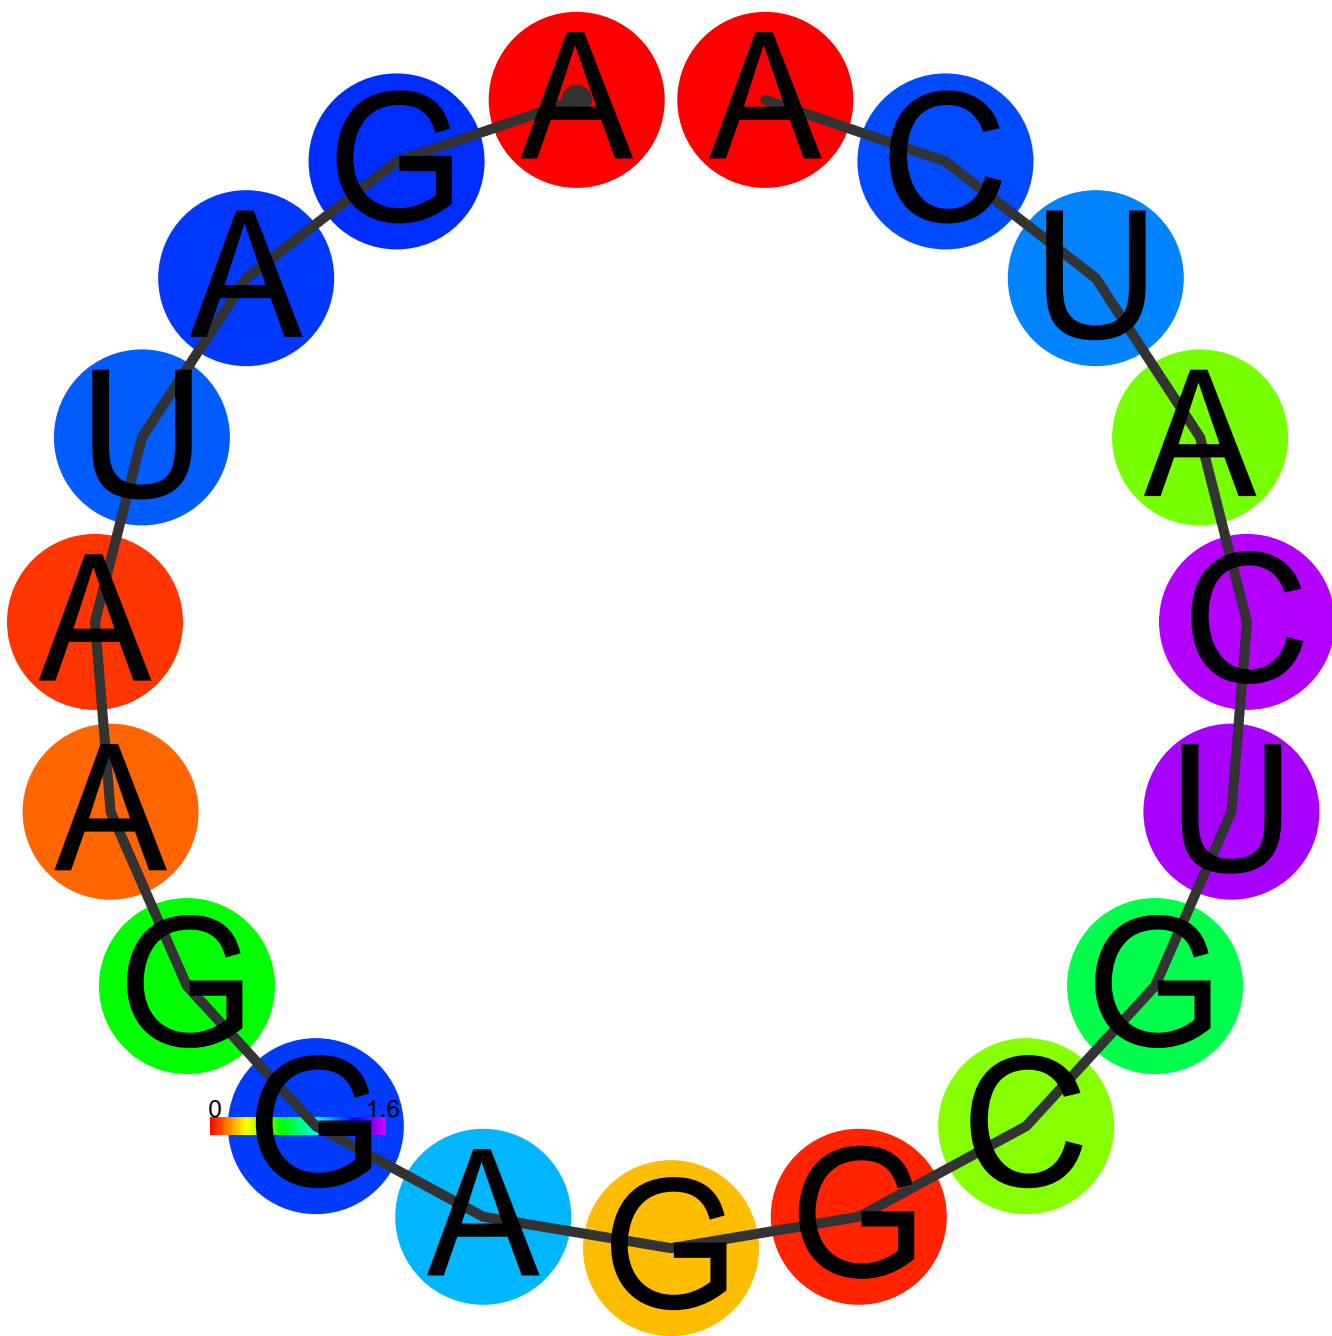

Supplement: Supplementary file 413 [file supplementary]

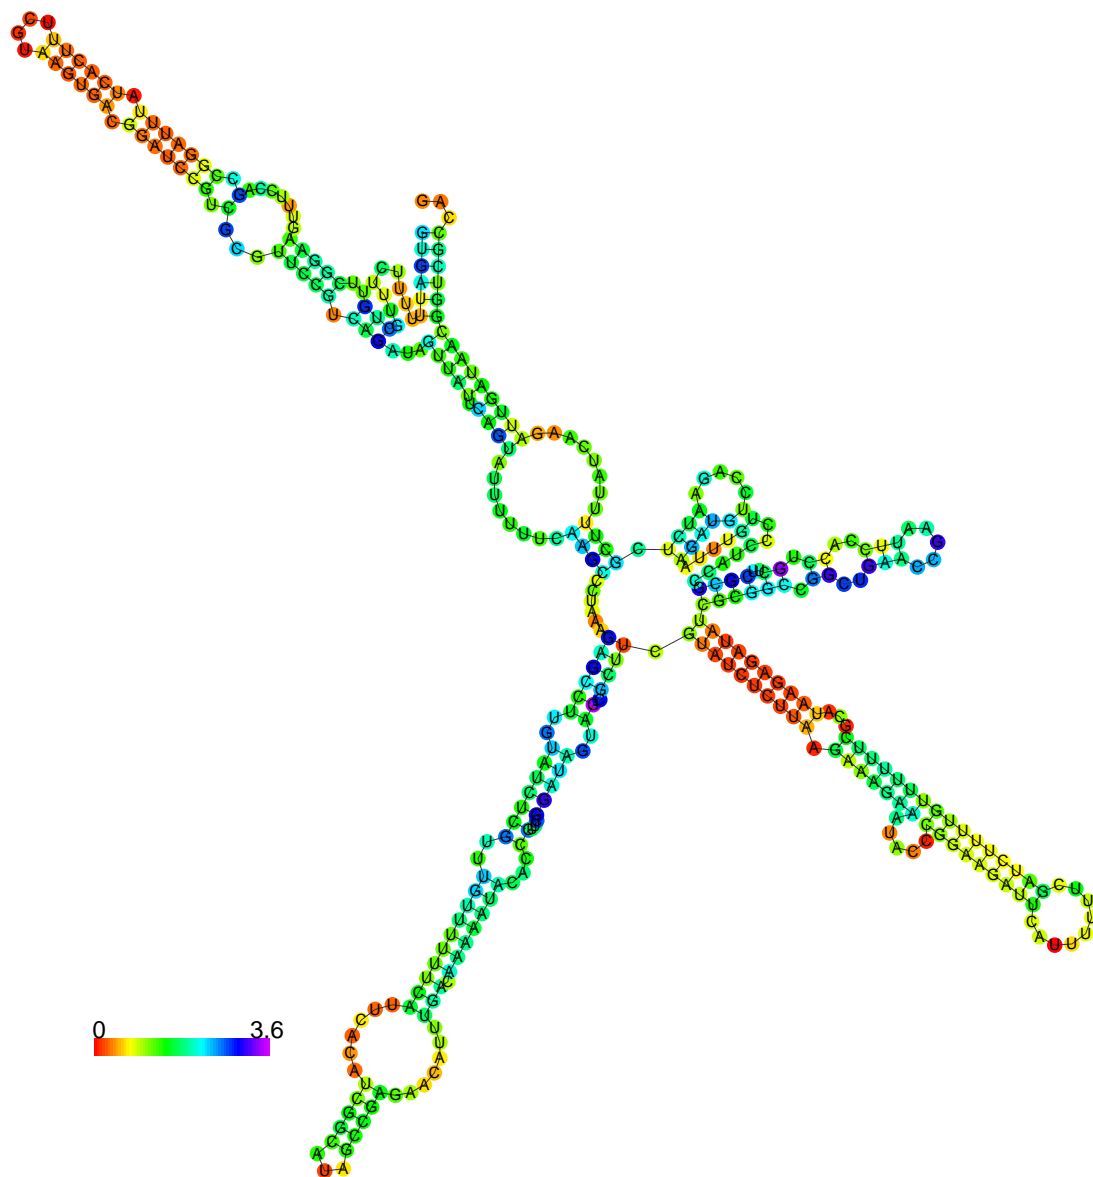

Supplement: Supplementary file 414 [file supplementary]



Supplement: Supplementary file 415 [file supplementary]

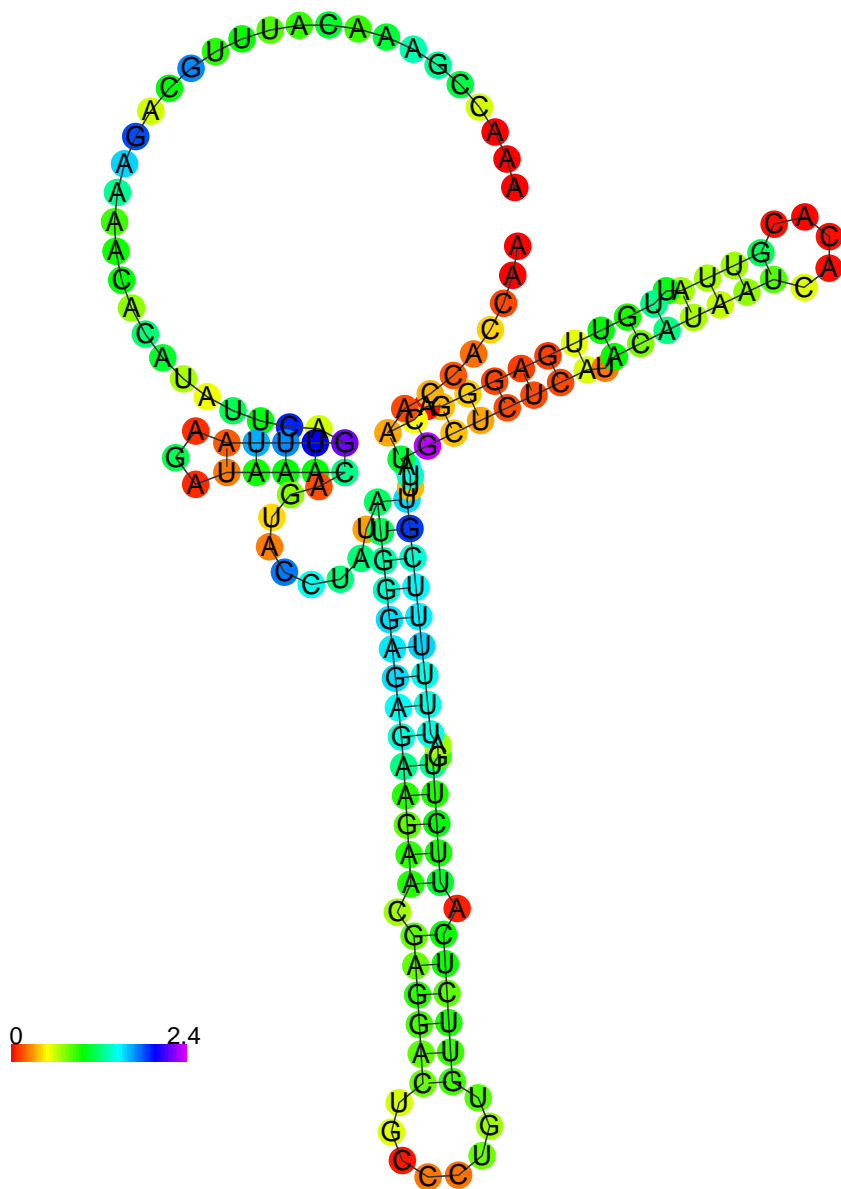

Supplement: Supplementary file 416 [file supplementary]

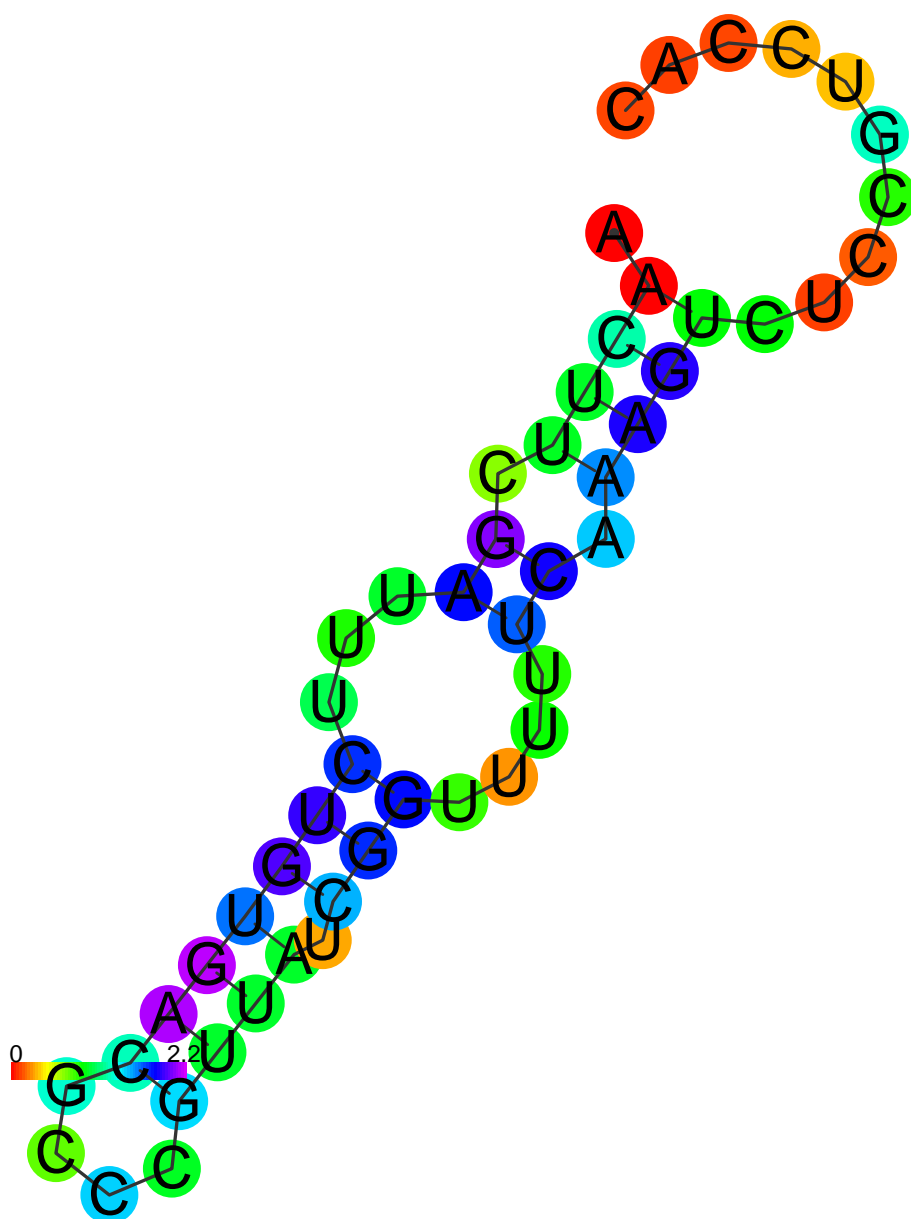

Supplement: Supplementary file 417 [file supplementary]

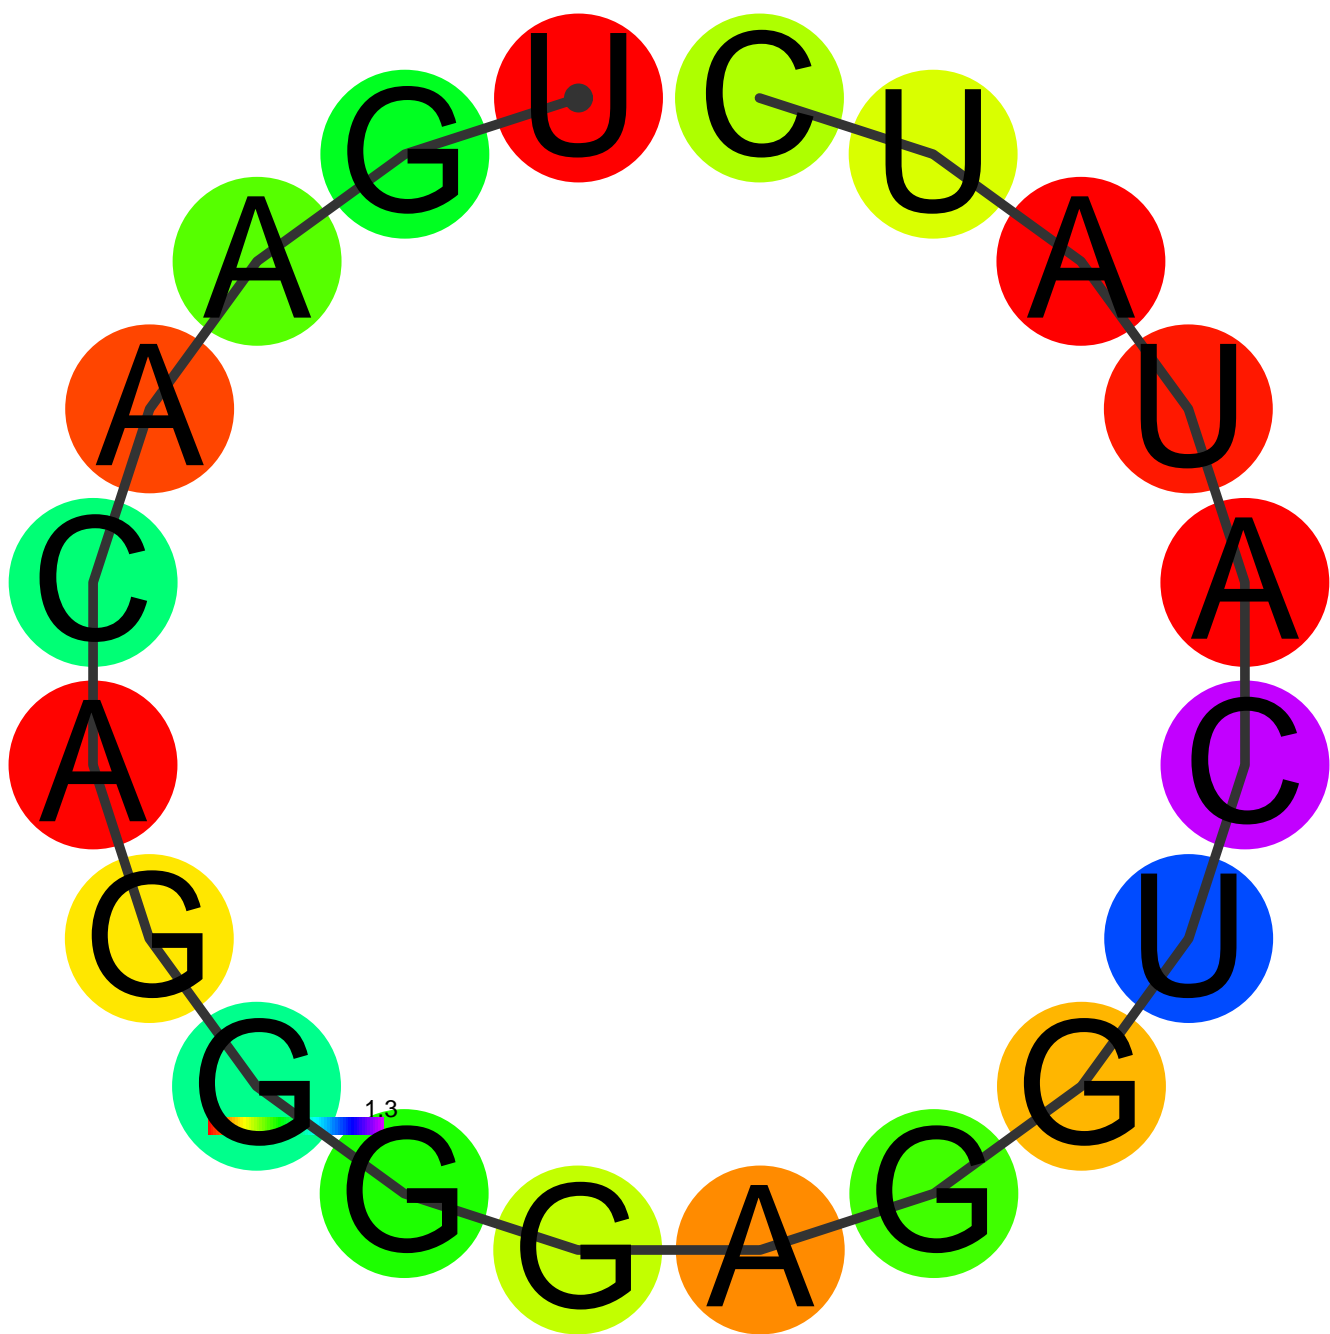

Supplement: Supplementary file 418 [file supplementary]

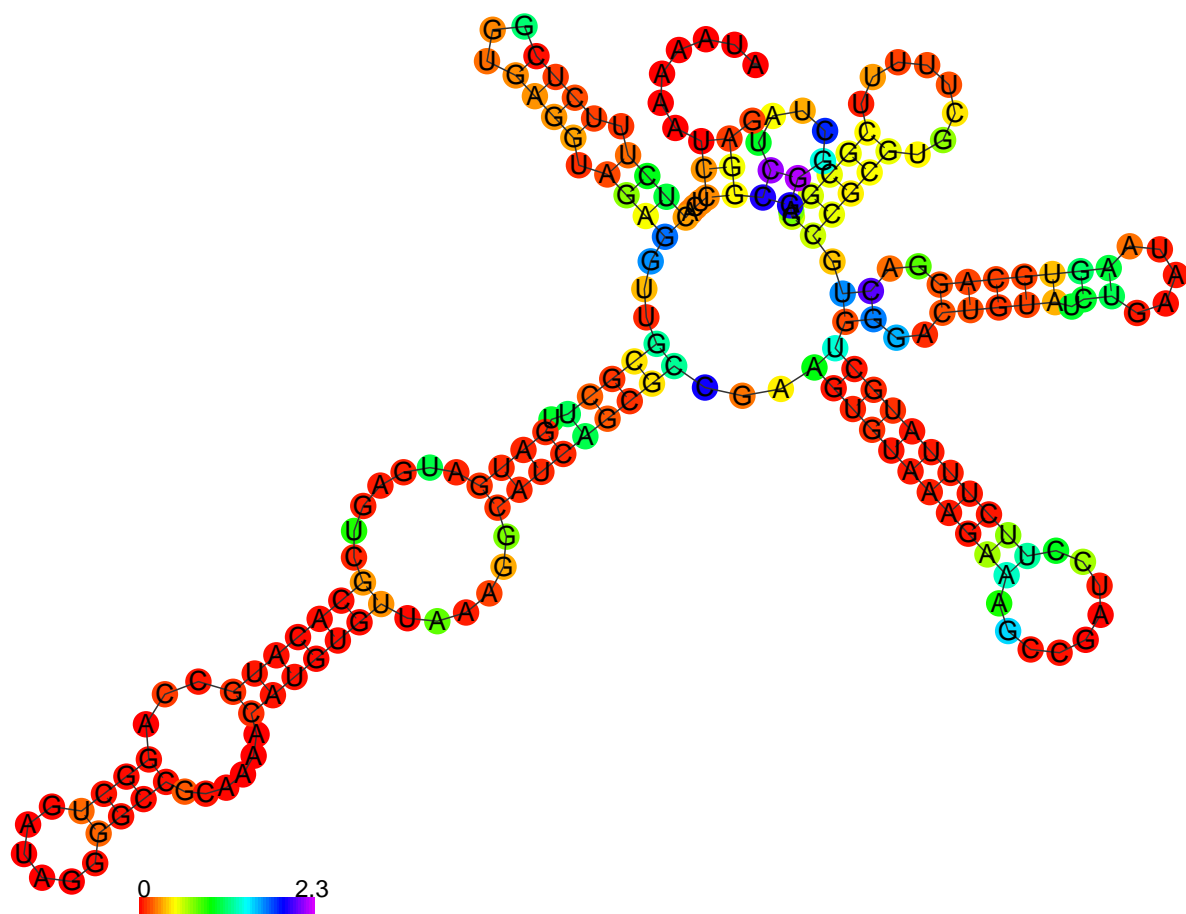

Supplement: Supplementary file 419 [file supplementary]

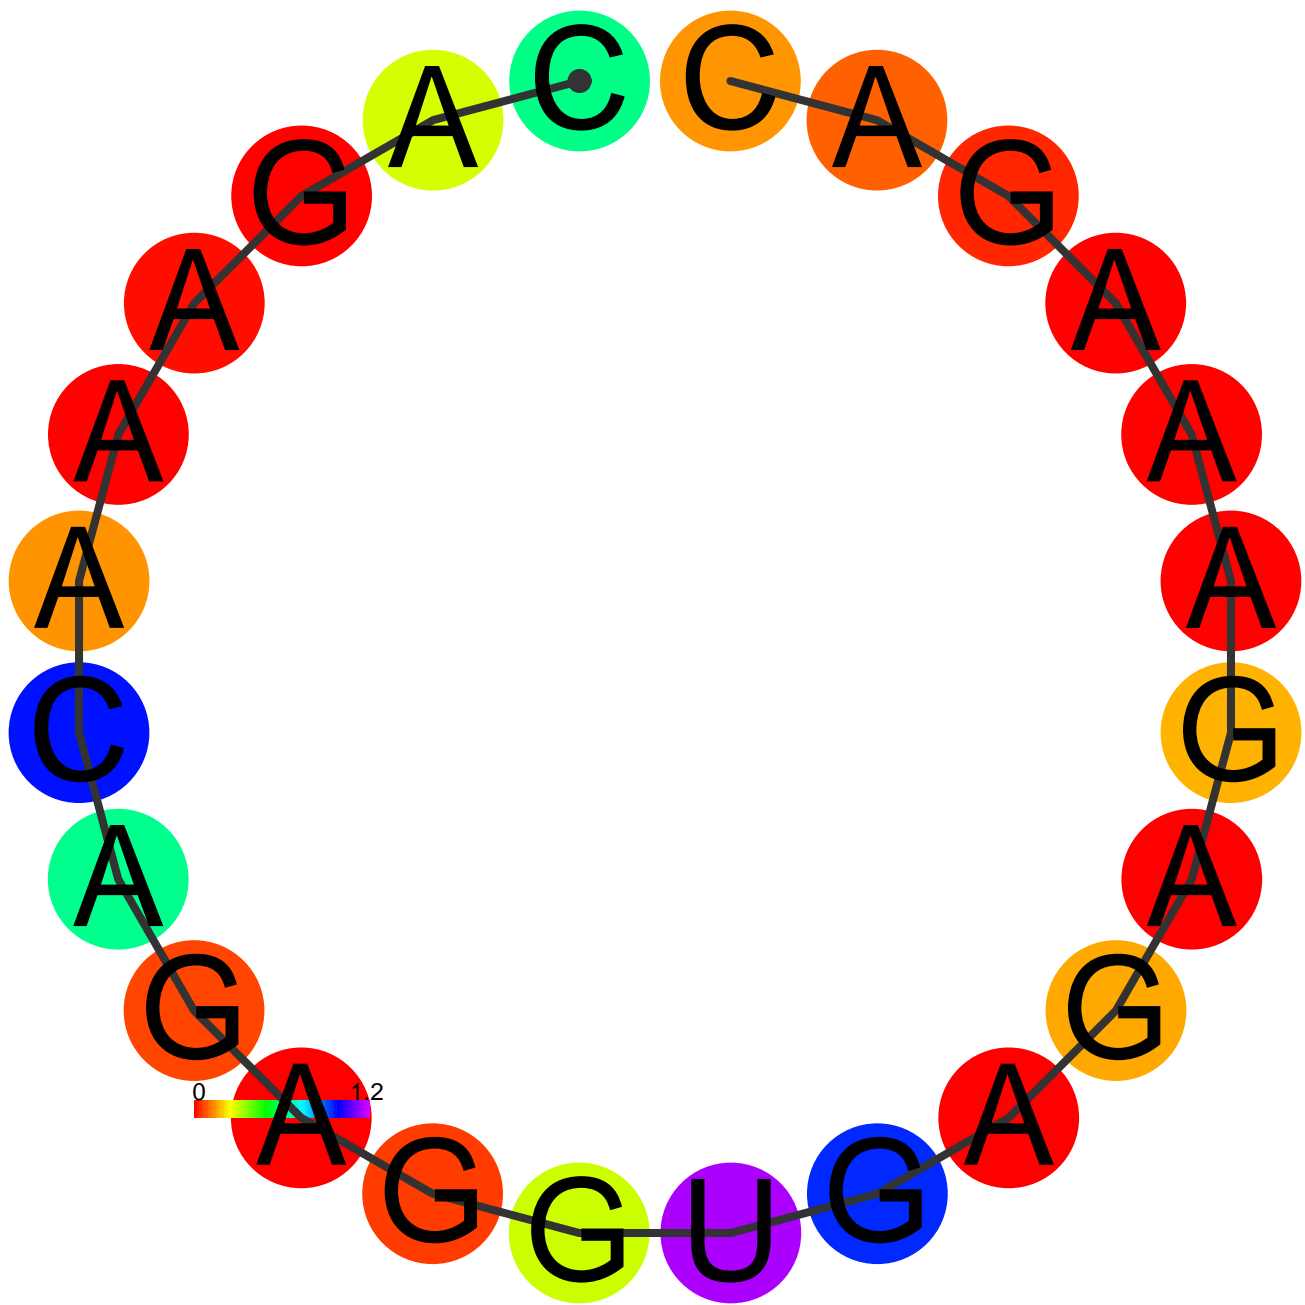

Supplement: Supplementary file 420 [file supplementary]

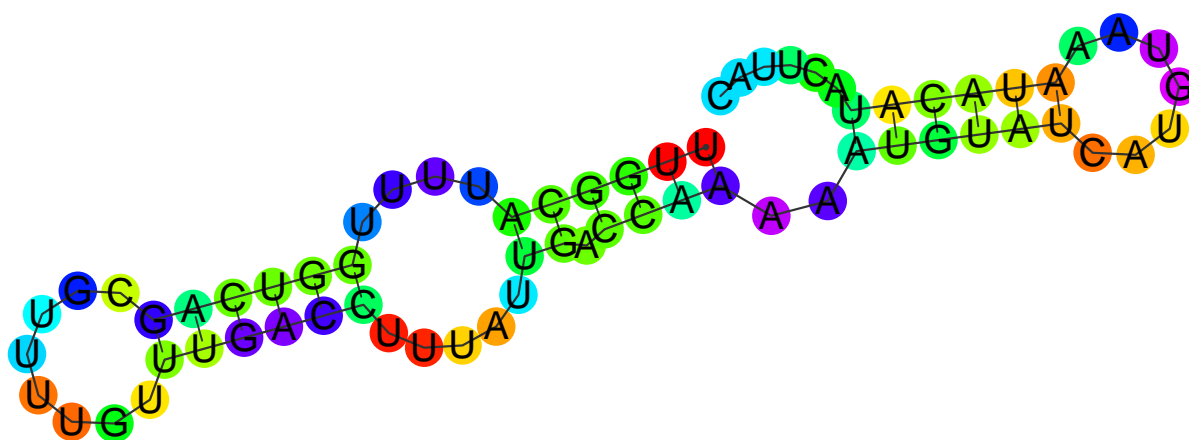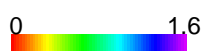

Supplement: Supplementary file 421 [file supplementary]

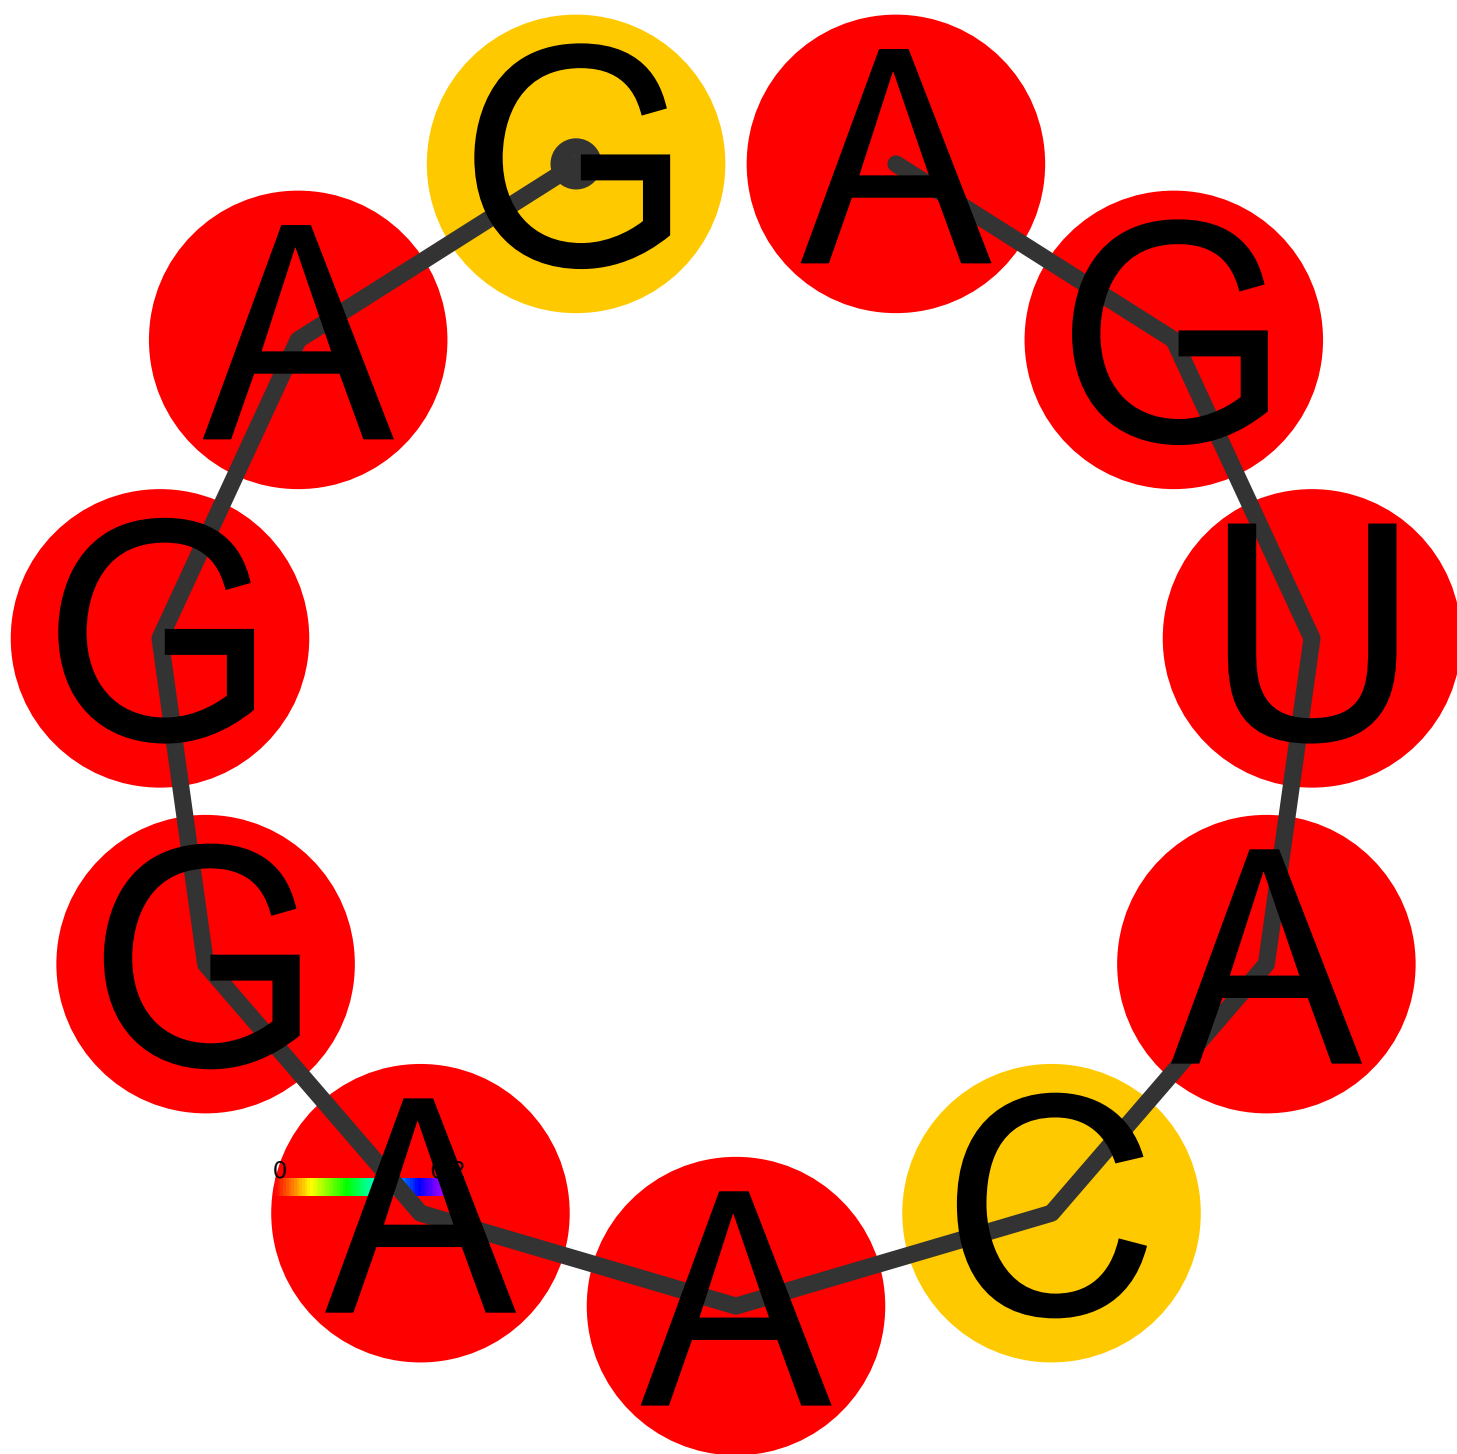

Supplement: Supplementary file 422 [file supplementary]

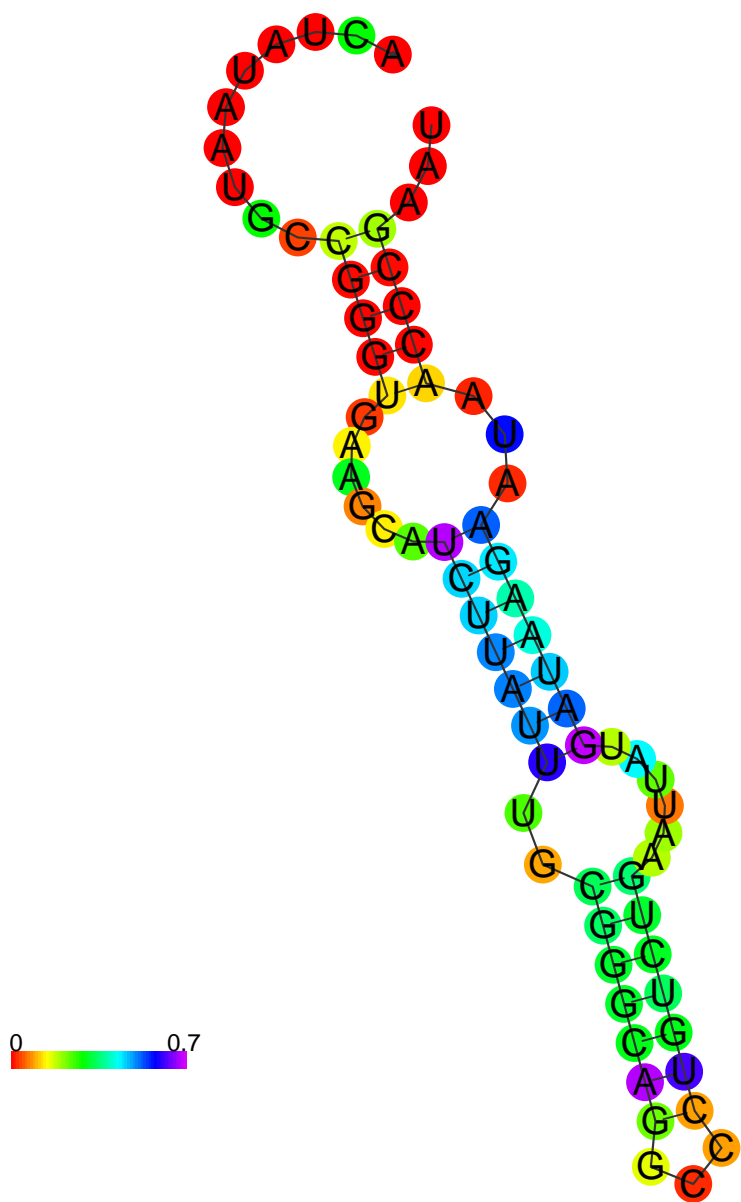

Supplement: Supplementary file 423 [file supplementary]

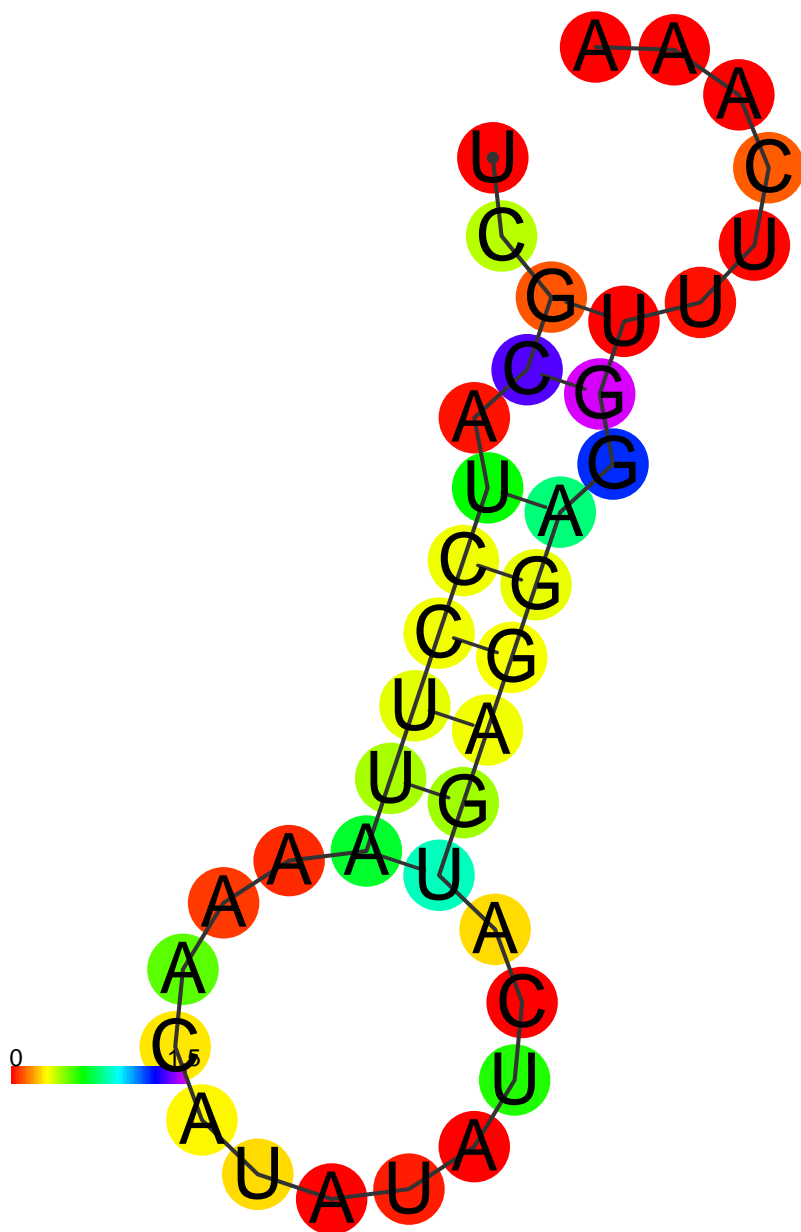

Supplement: Supplementary file 424 [file supplementary]

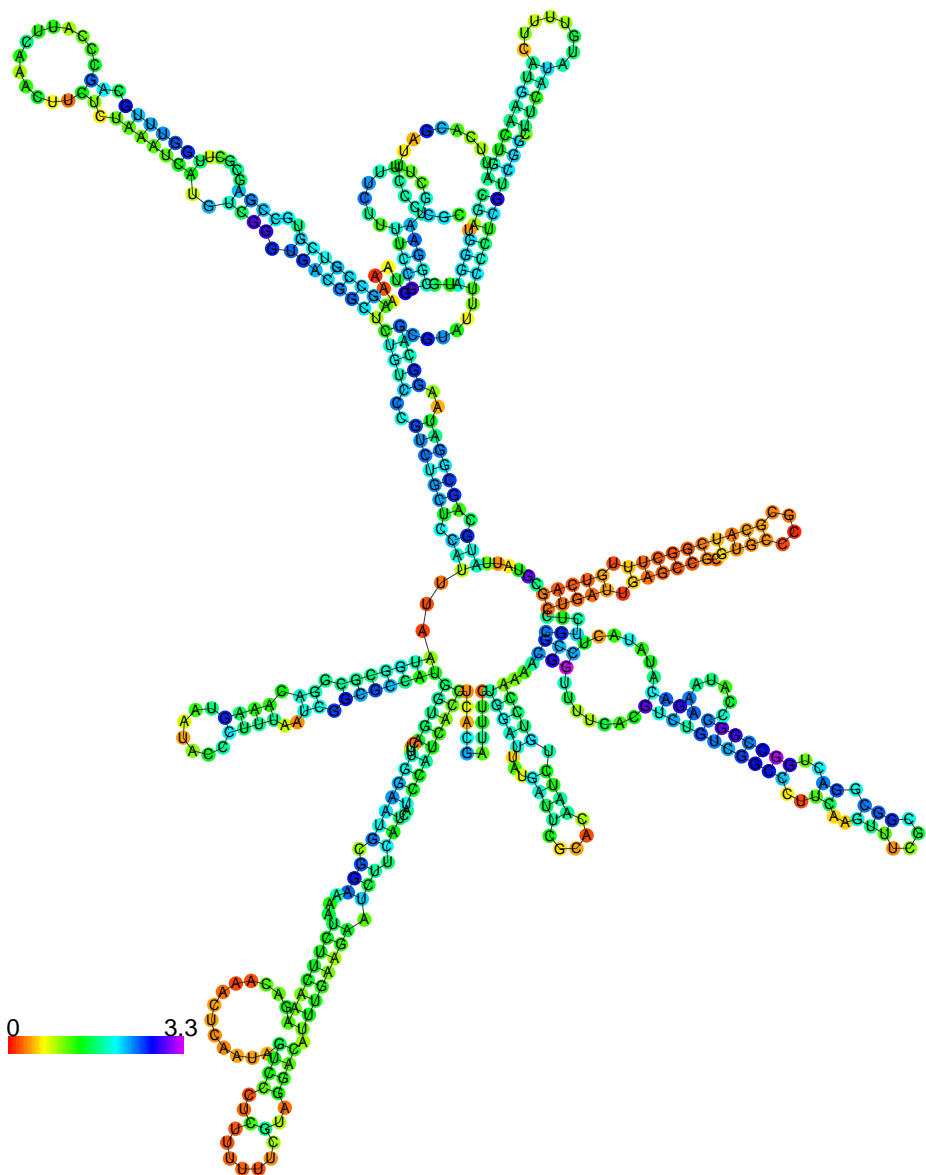

Supplement: Supplementary file 425 [file supplementary]

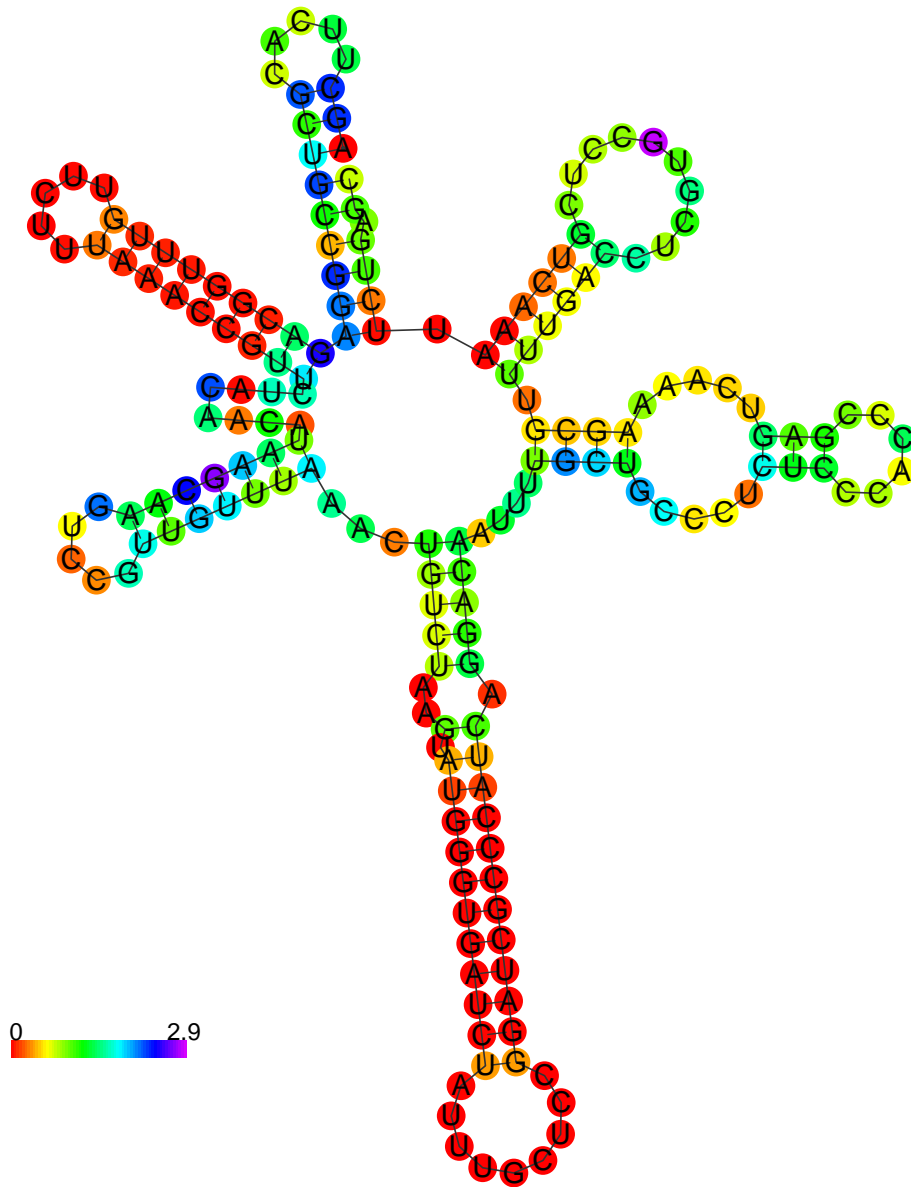

Supplement: Supplementary file 426 [file supplementary]

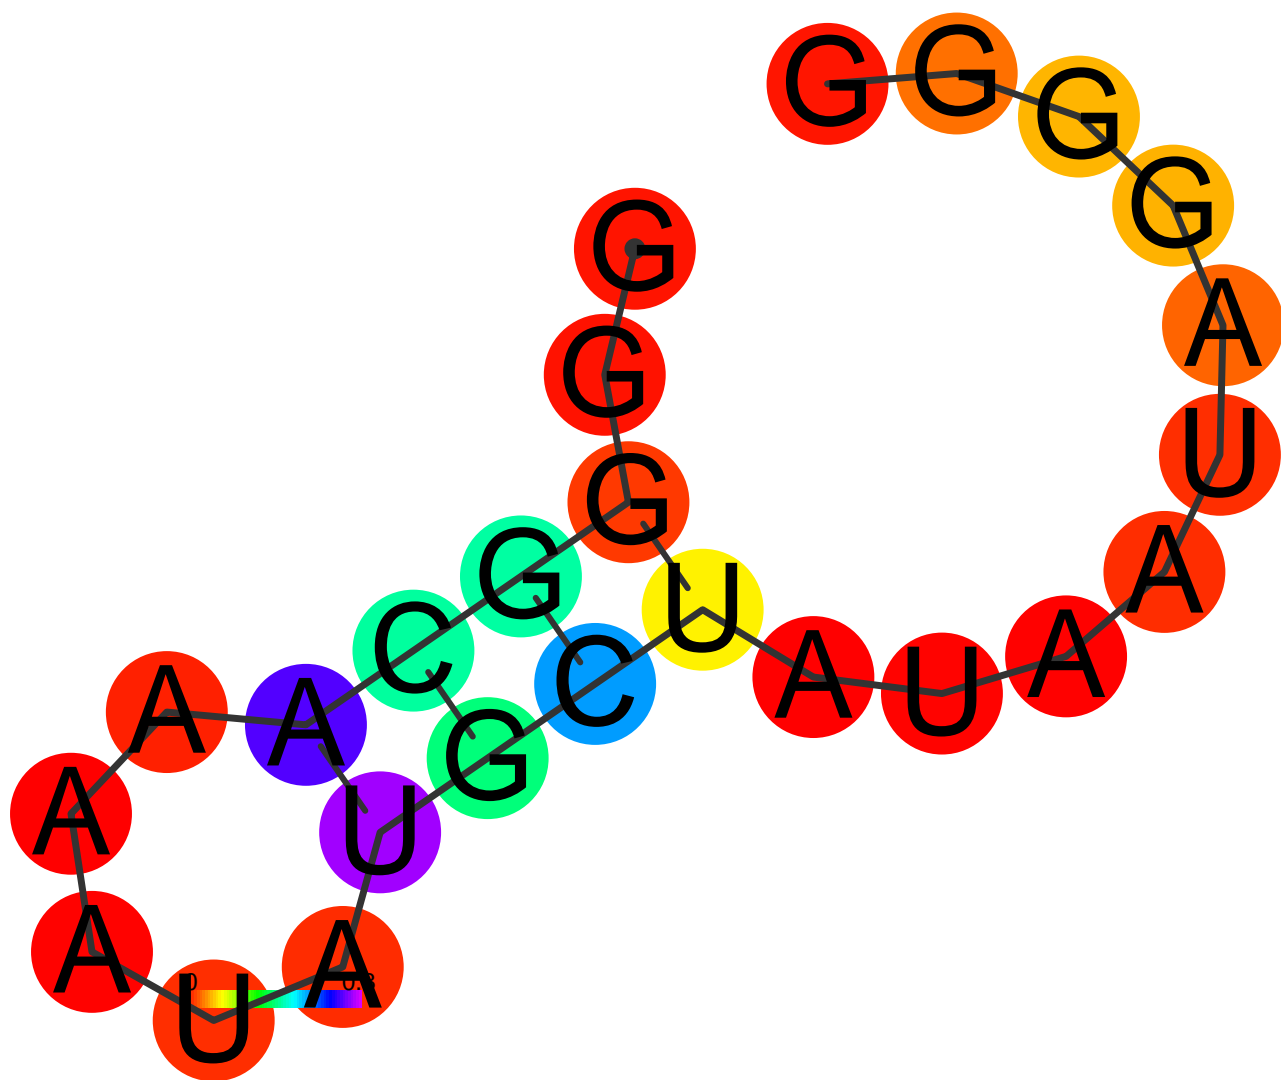

Supplement: Supplementary file 427 [file supplementary]

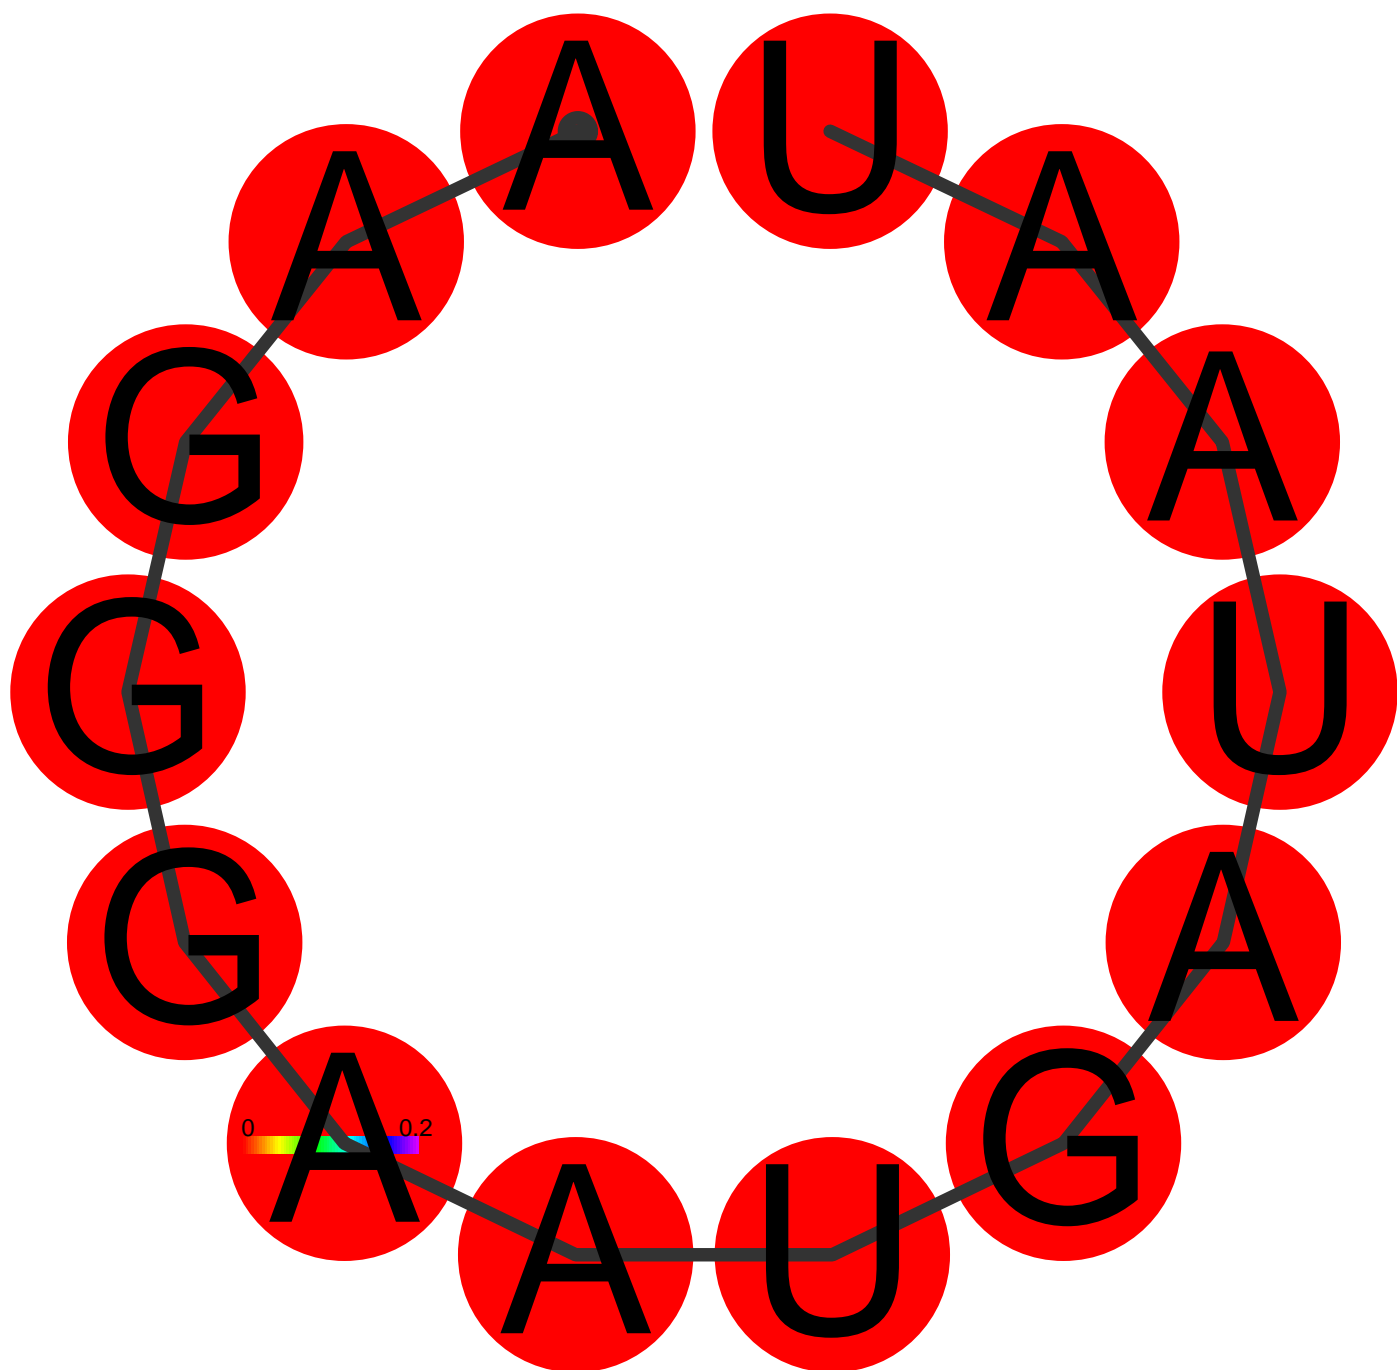

Supplement: Supplementary file 428 [file supplementary]

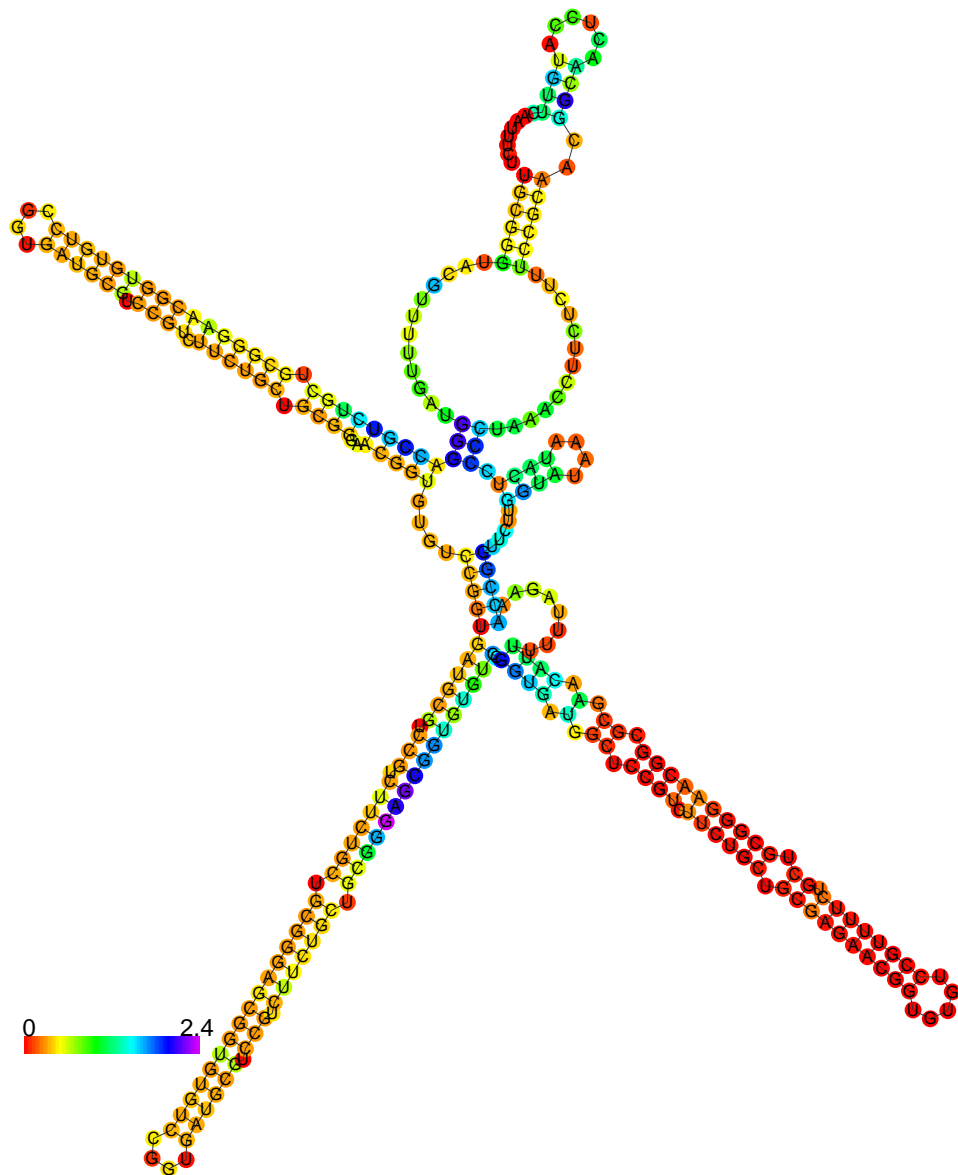

Supplement: Supplementary file 429 [file supplementary]

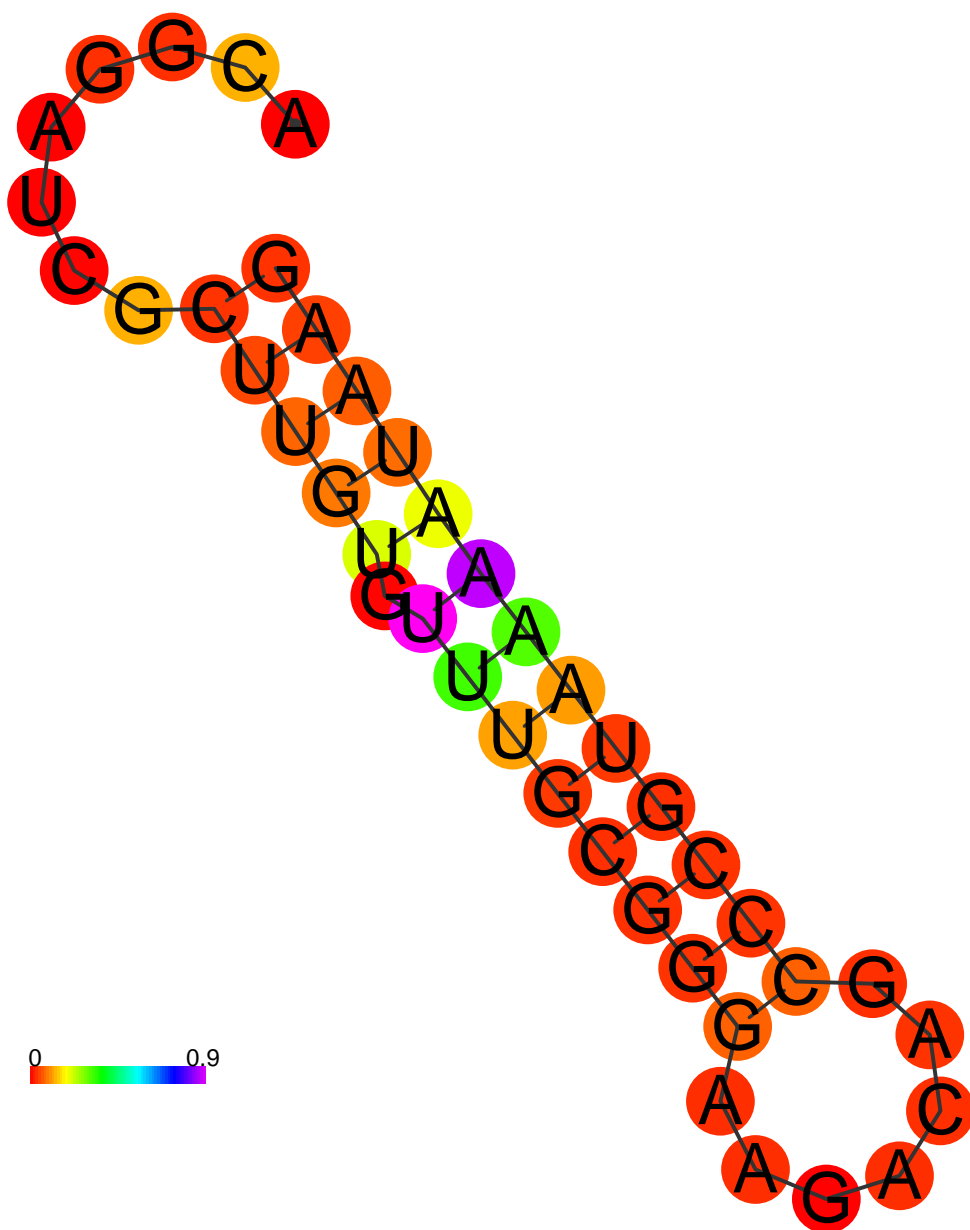

Supplement: Supplementary file 430 [file supplementary]

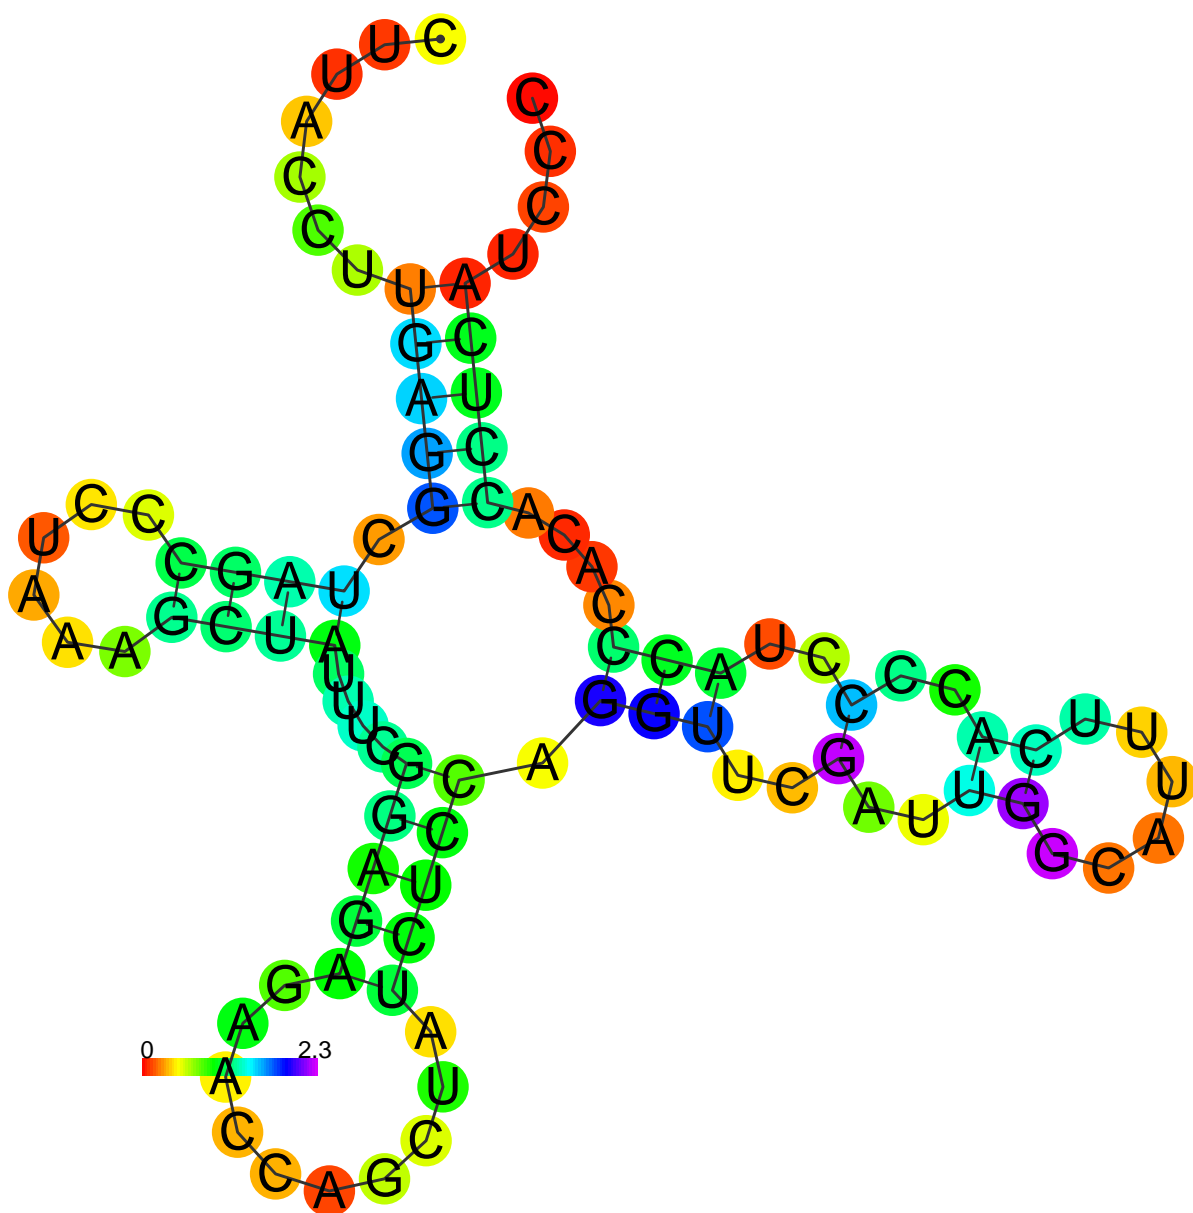

Supplement: Supplementary file 431 [file supplementary]

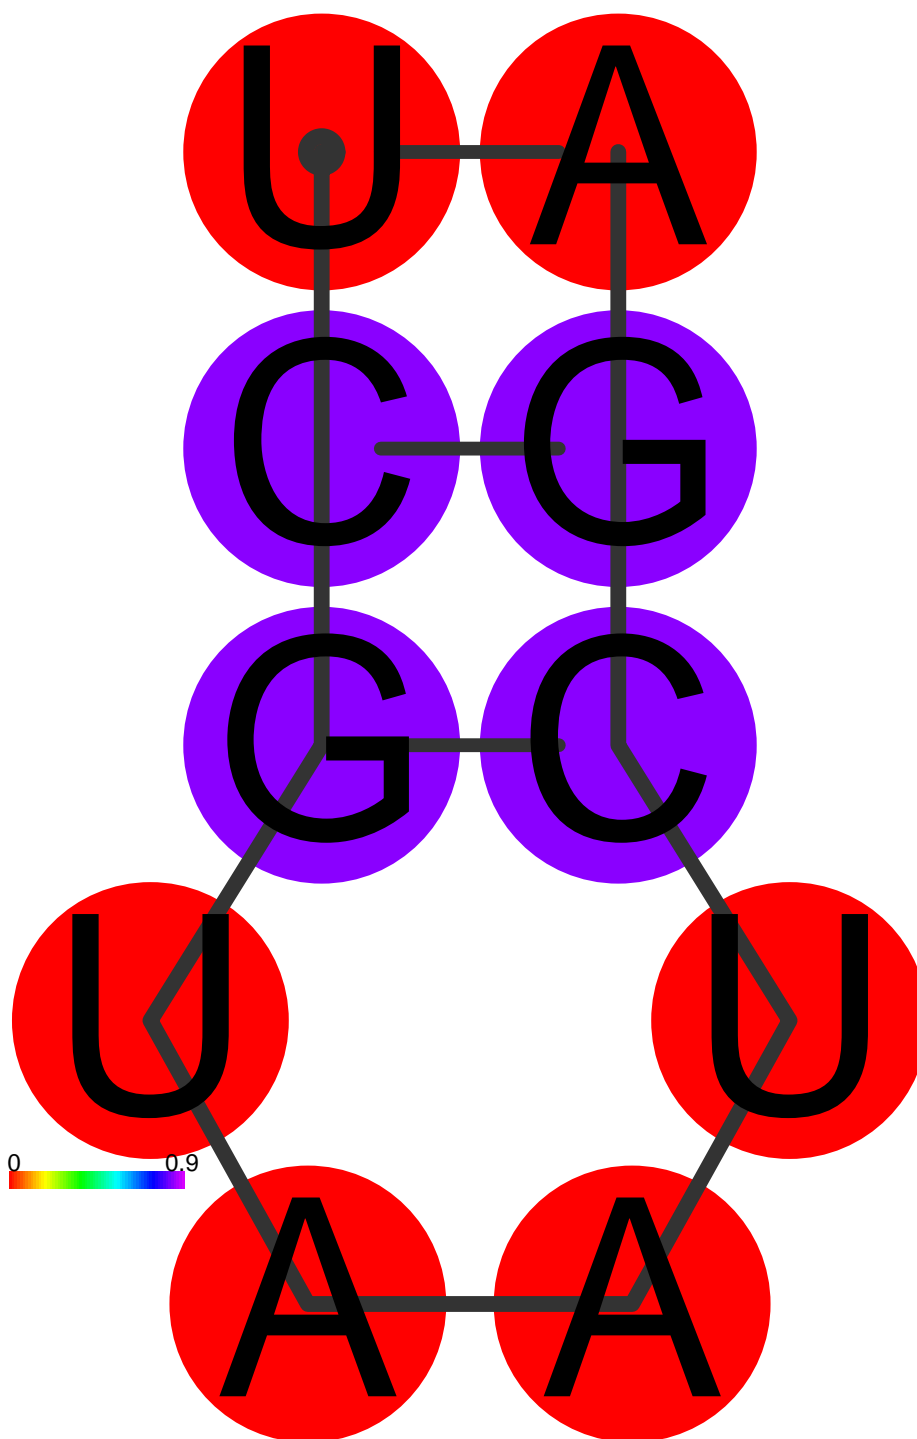

Supplement: Supplementary file 432 [file supplementary]

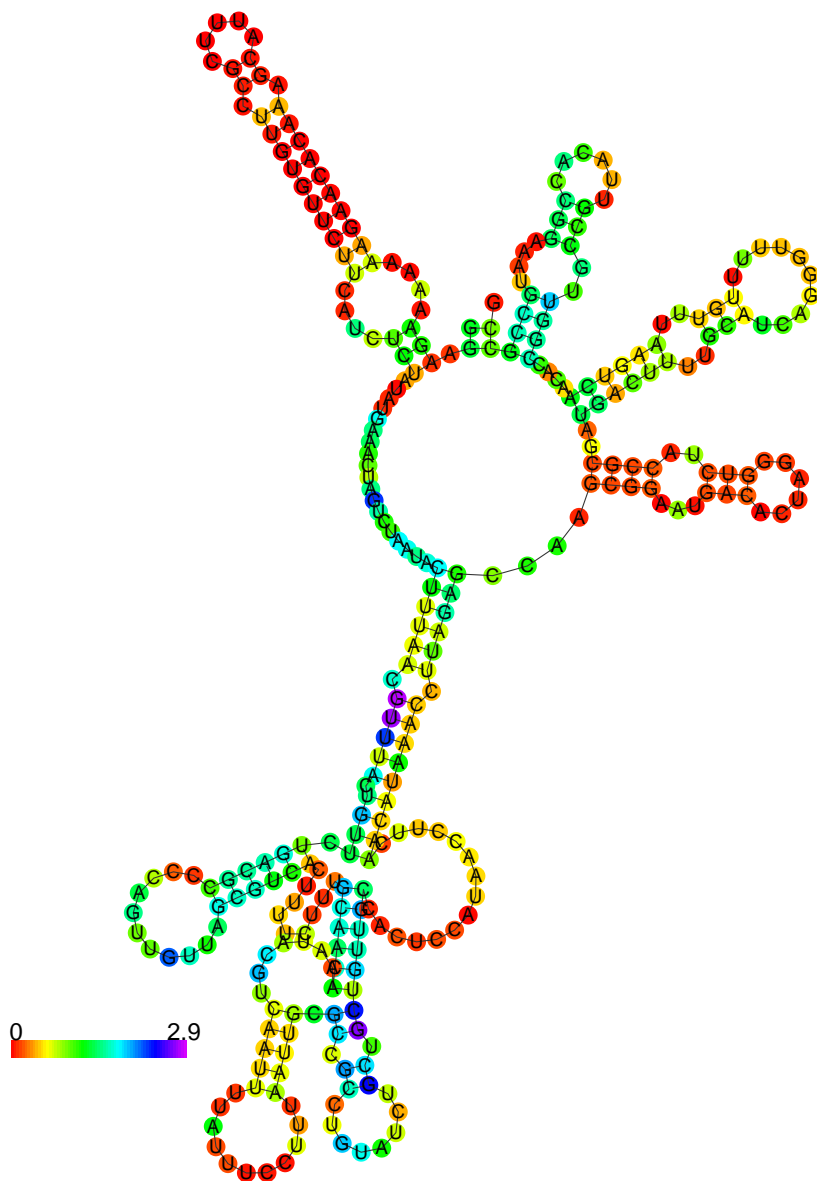

Supplement: Supplementary file 433 [file supplementary]

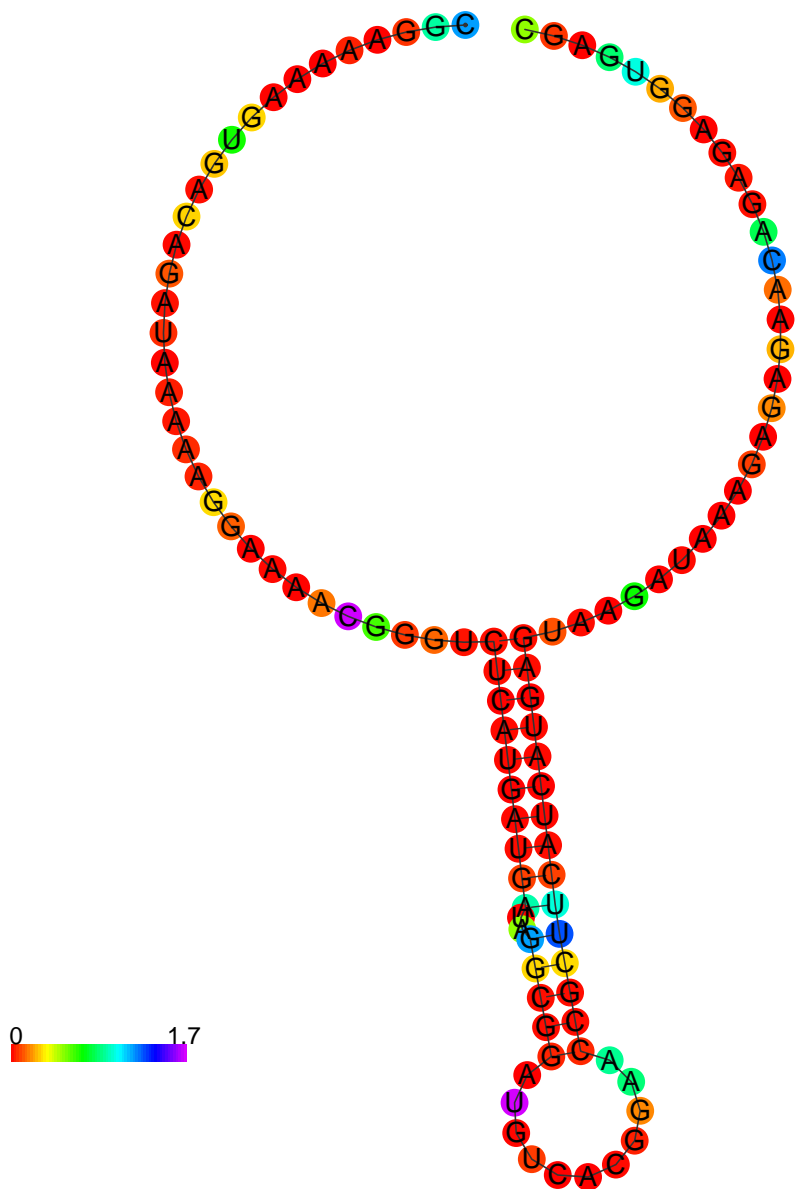

Supplement: Supplementary file 434 [file supplementary]

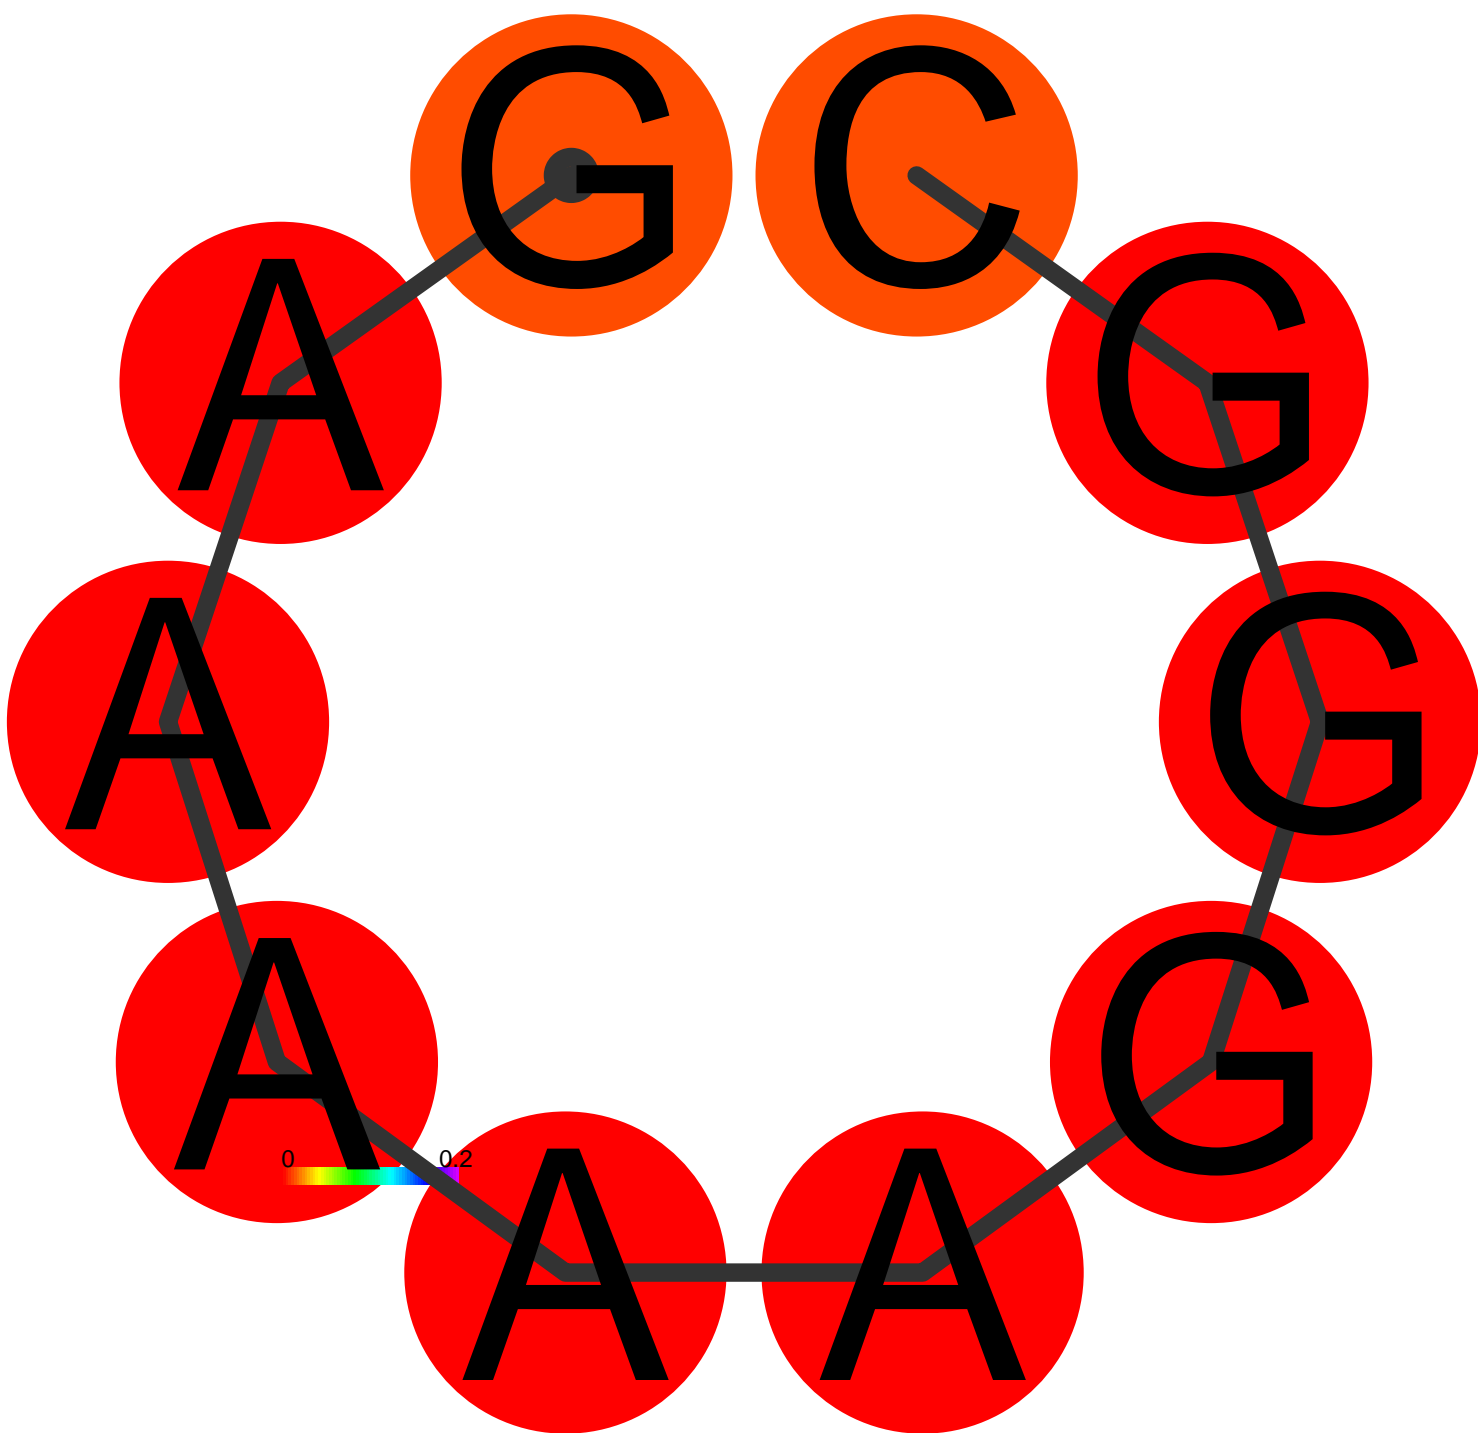

Supplement: Supplementary file 435 [file supplementary]

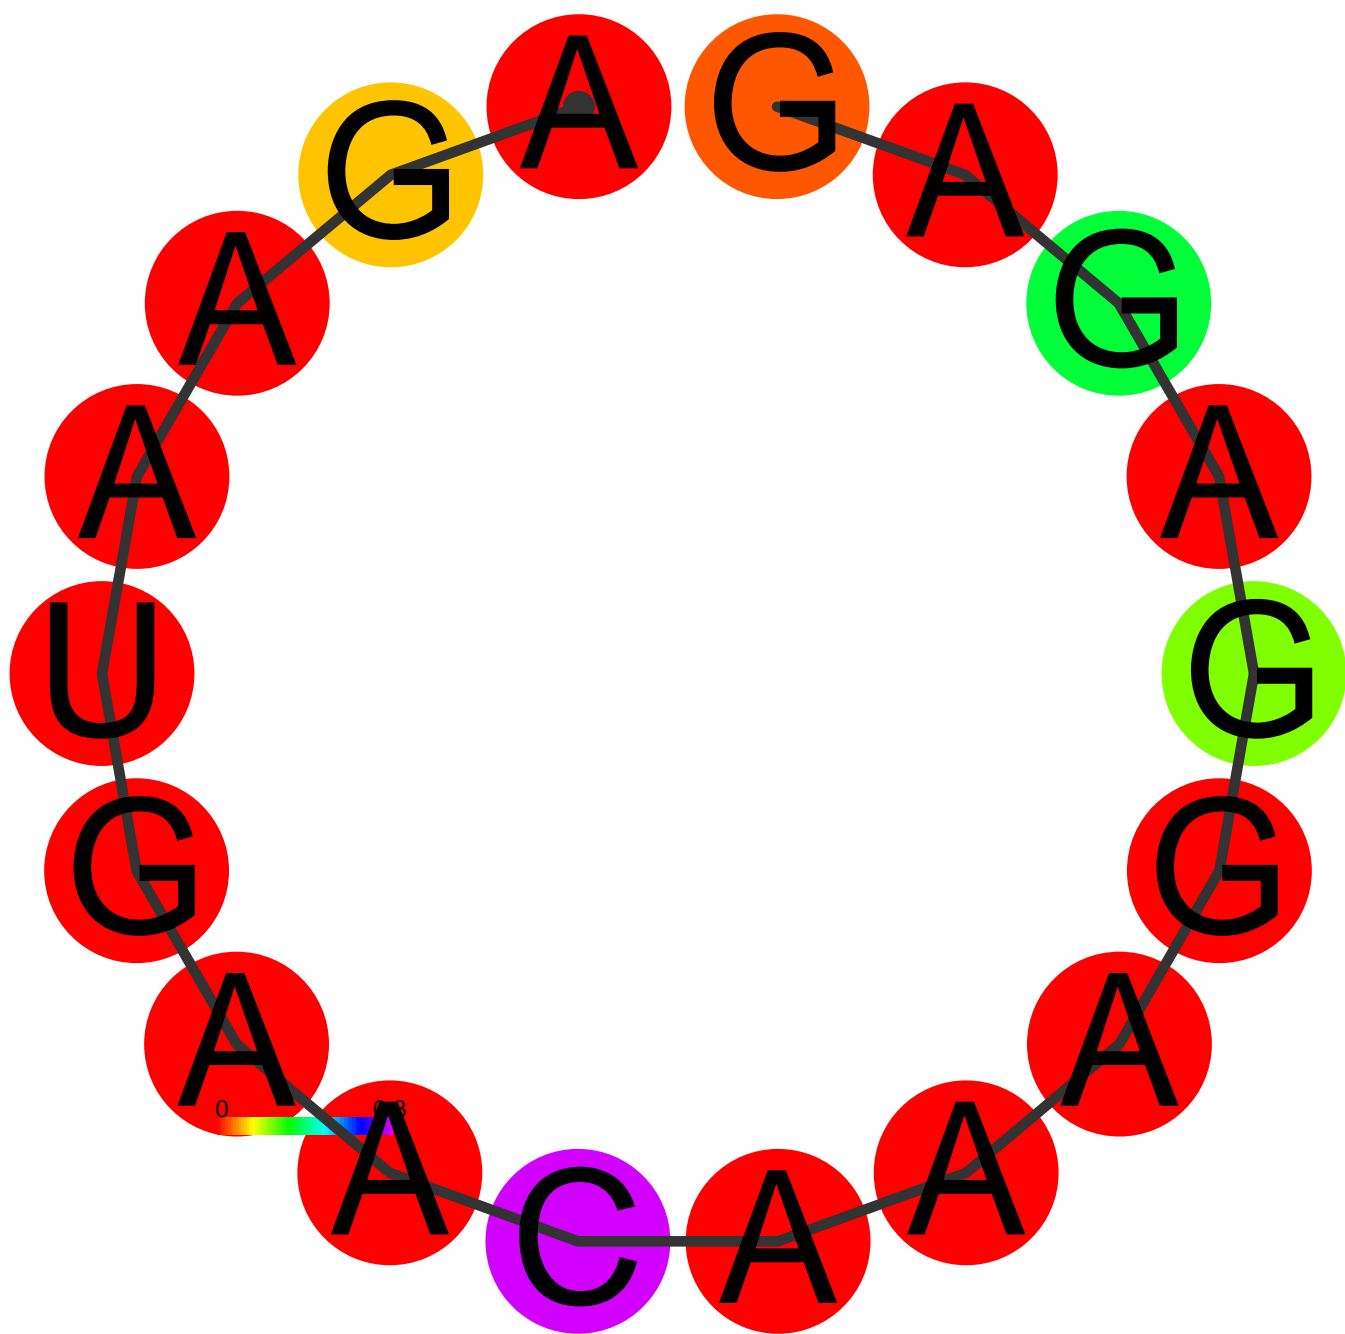

Supplement: Supplementary file 436 [file supplementary]

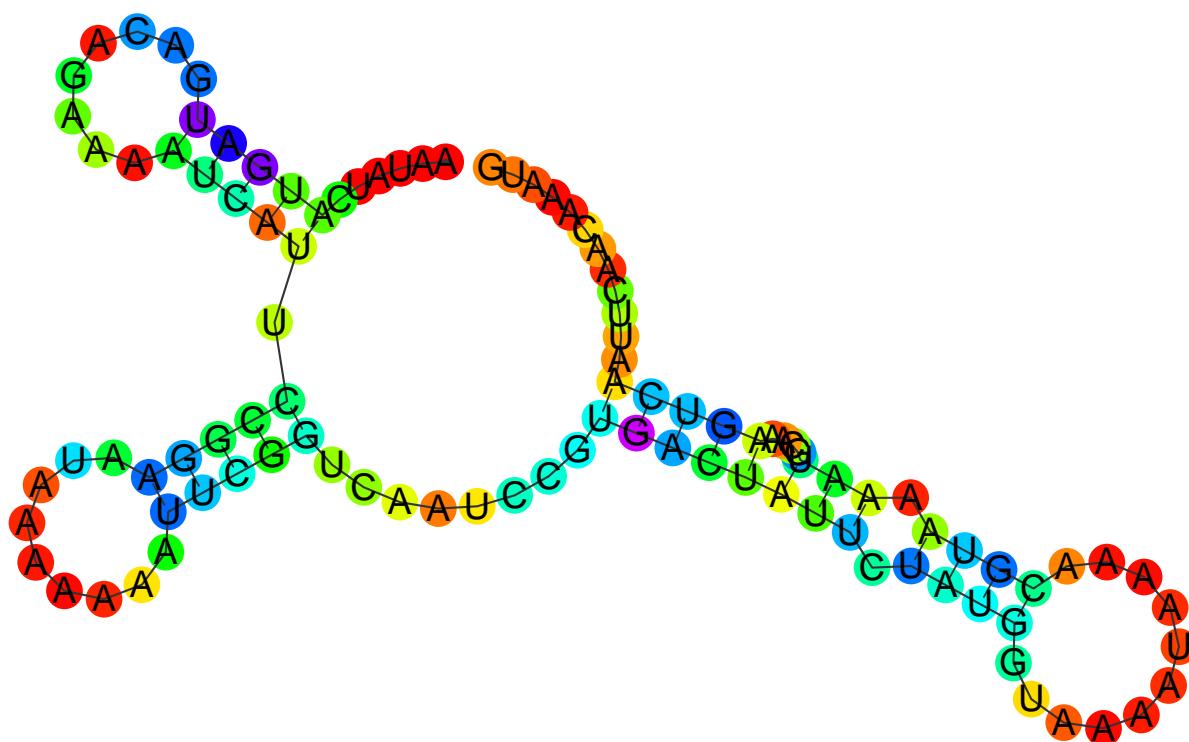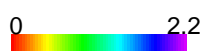

Supplement: Supplementary file 437 [file supplementary]

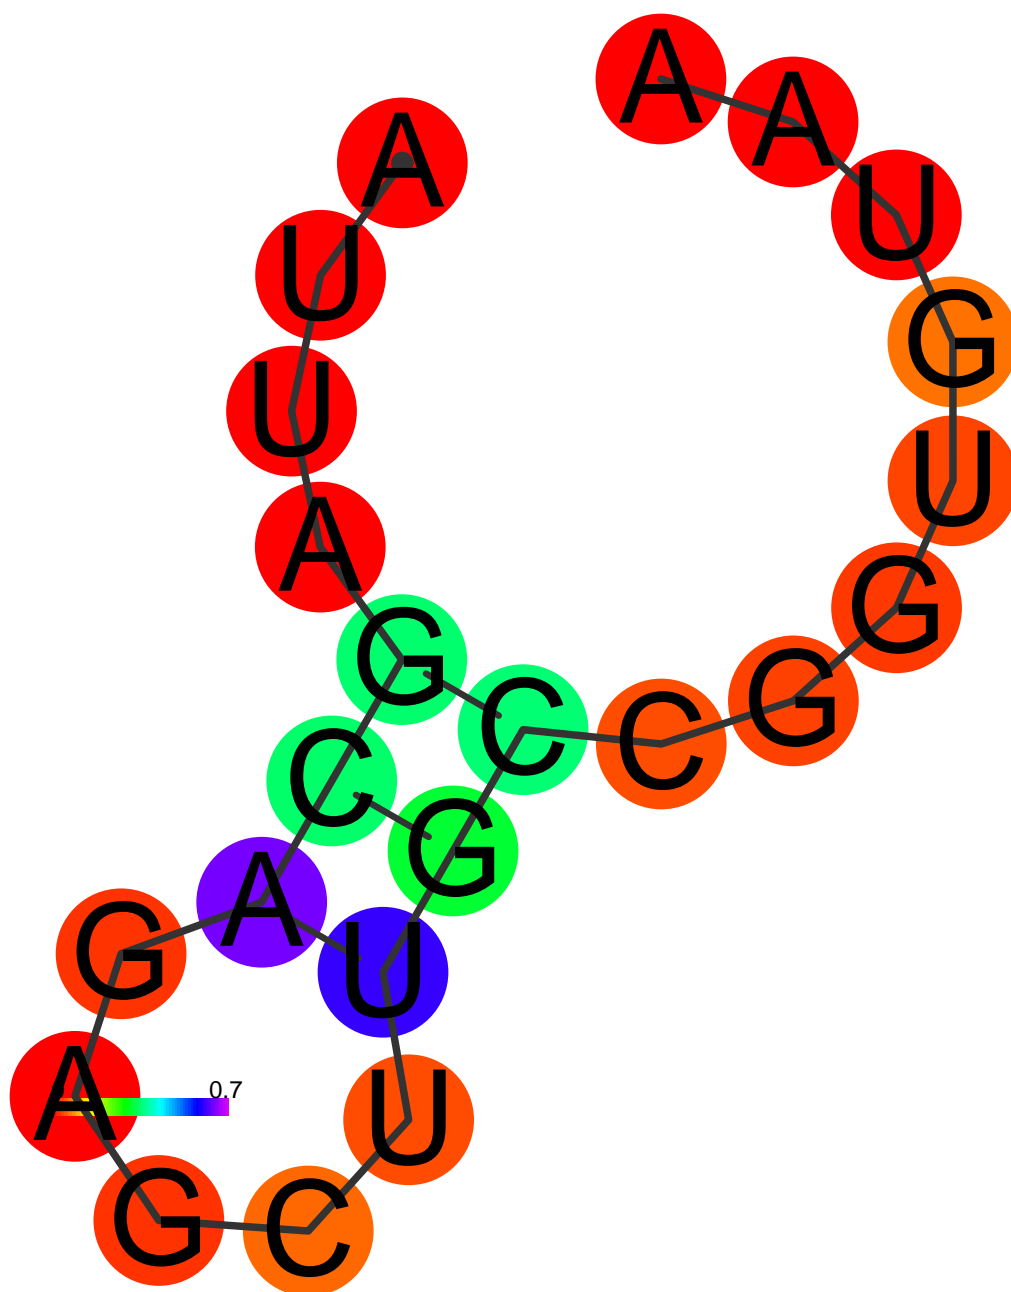

Supplement: Supplementary file 438 [file supplementary]

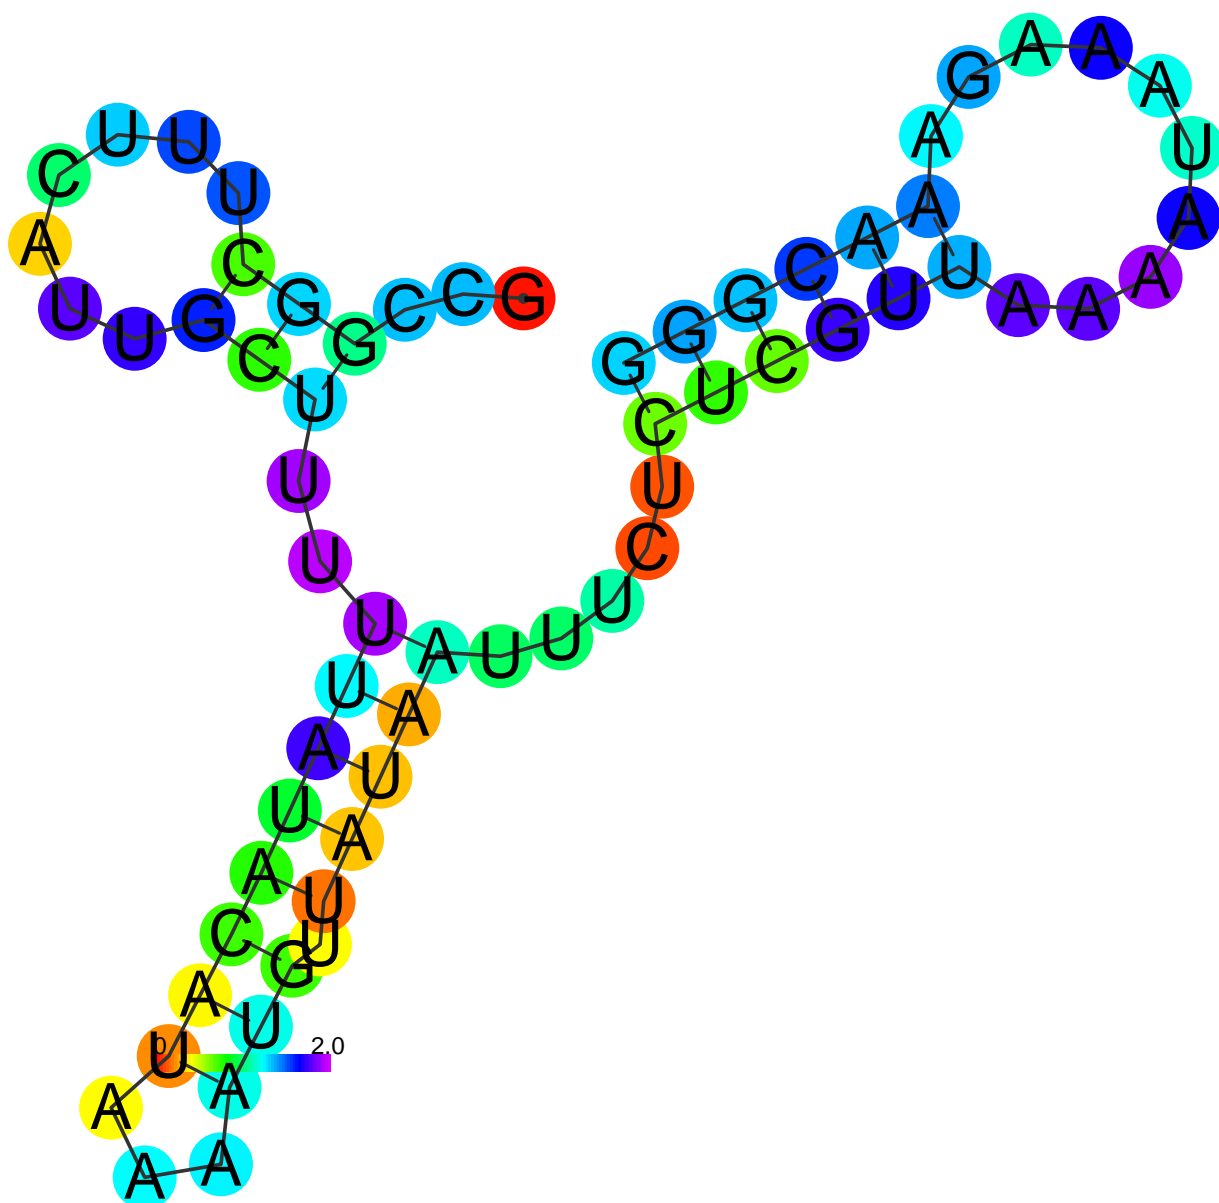

Supplement: Supplementary file 439 [file supplementary]

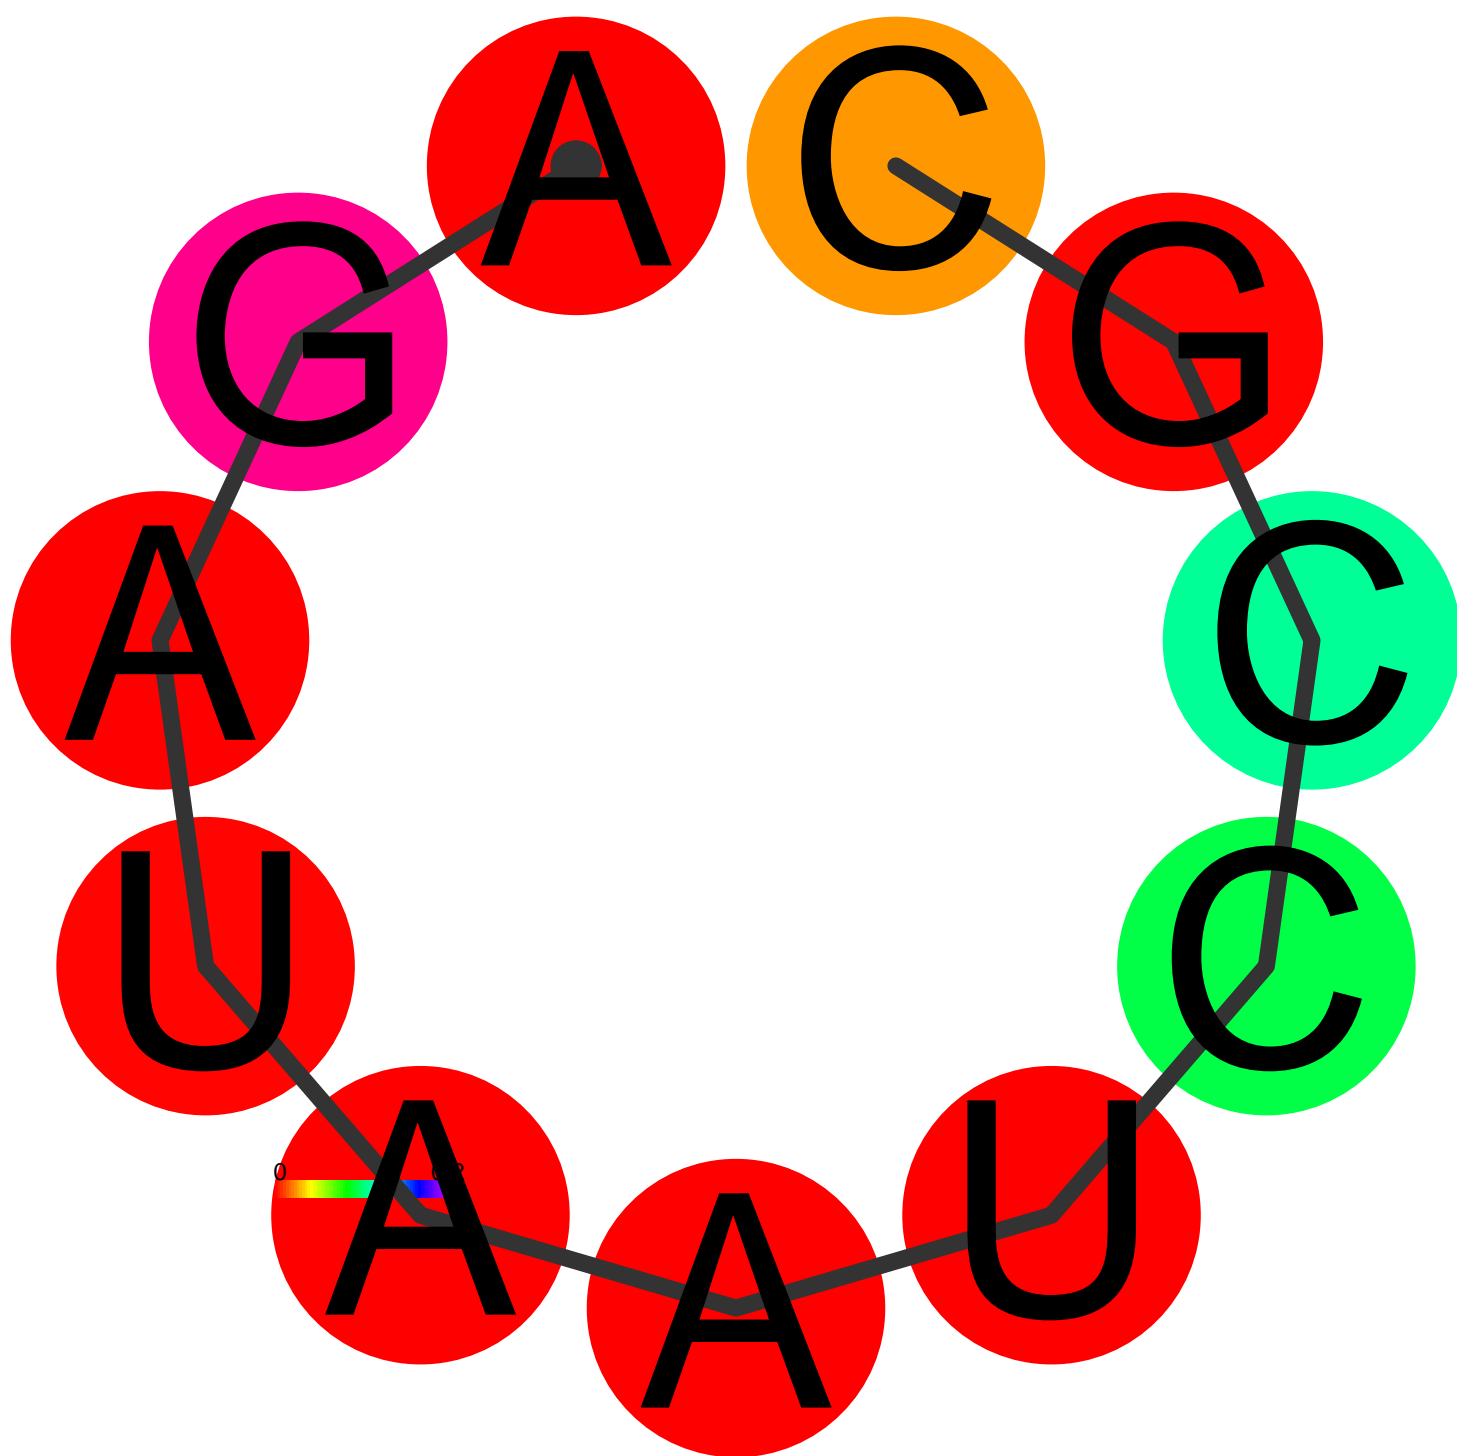

Supplement: Supplementary file 440 [file supplementary]

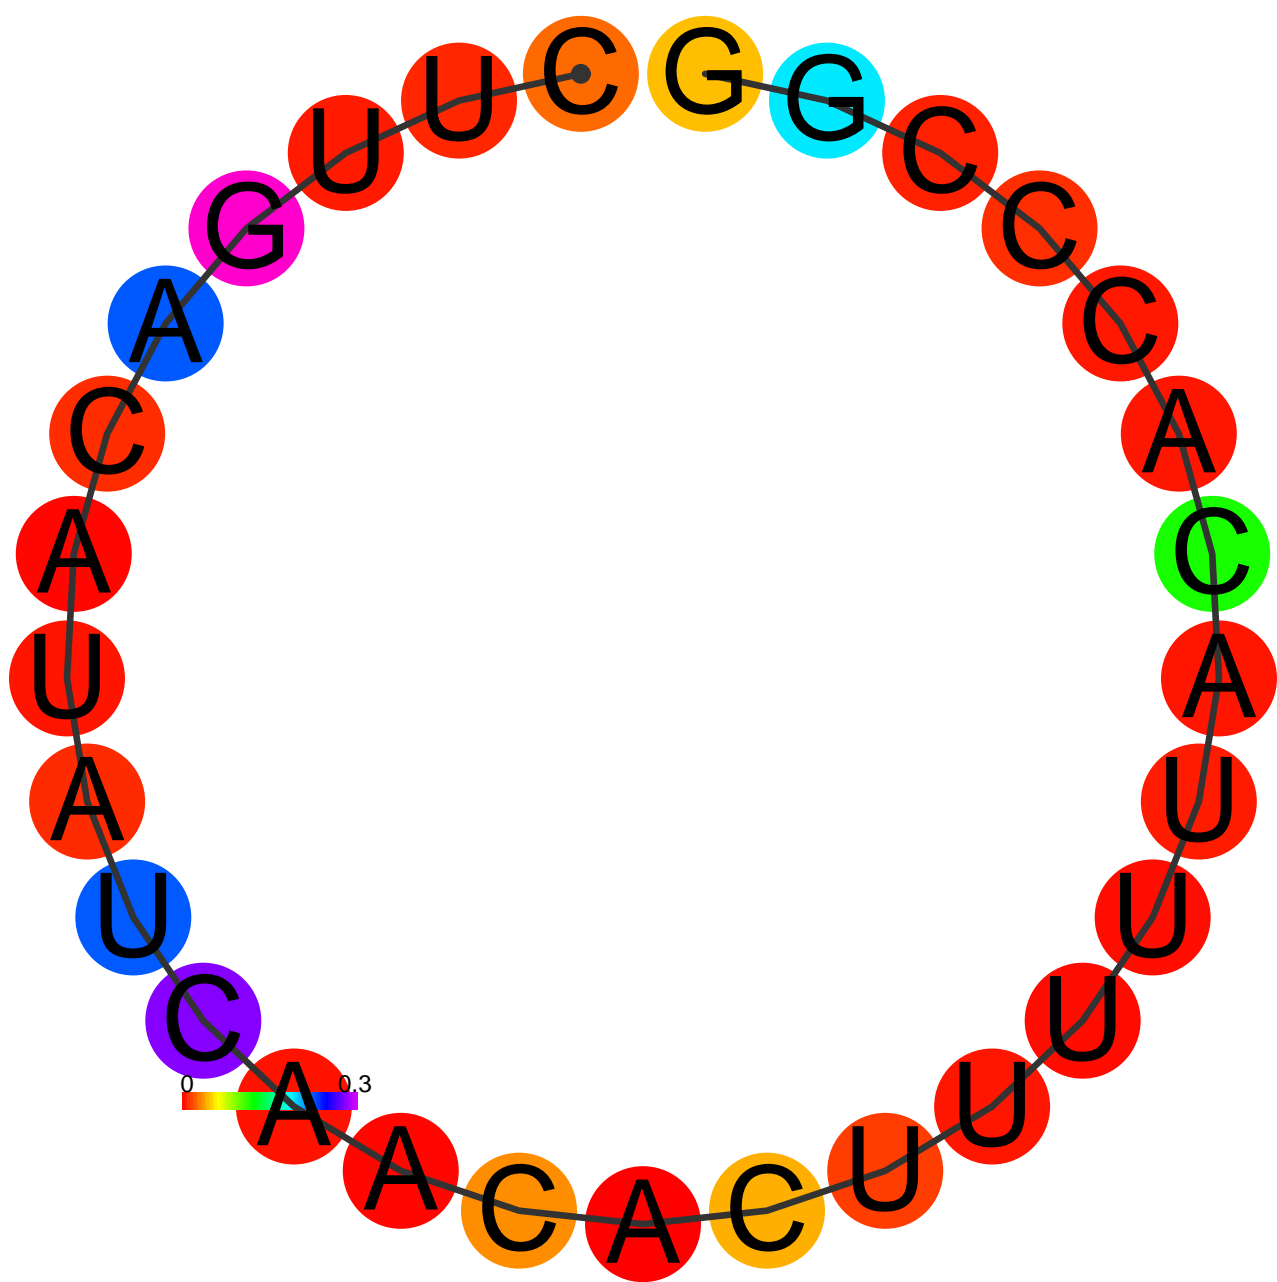

Supplement: Supplementary file 441 [file supplementary]

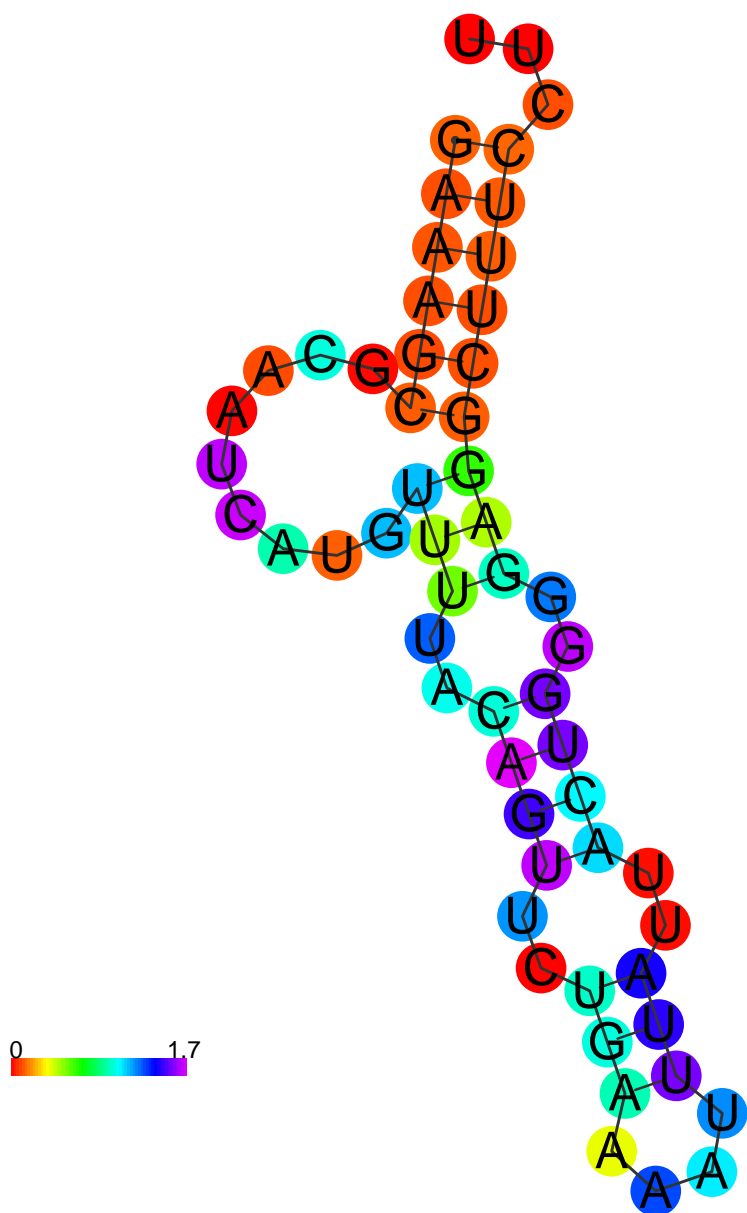

Supplement: Supplementary file 442 [file supplementary]

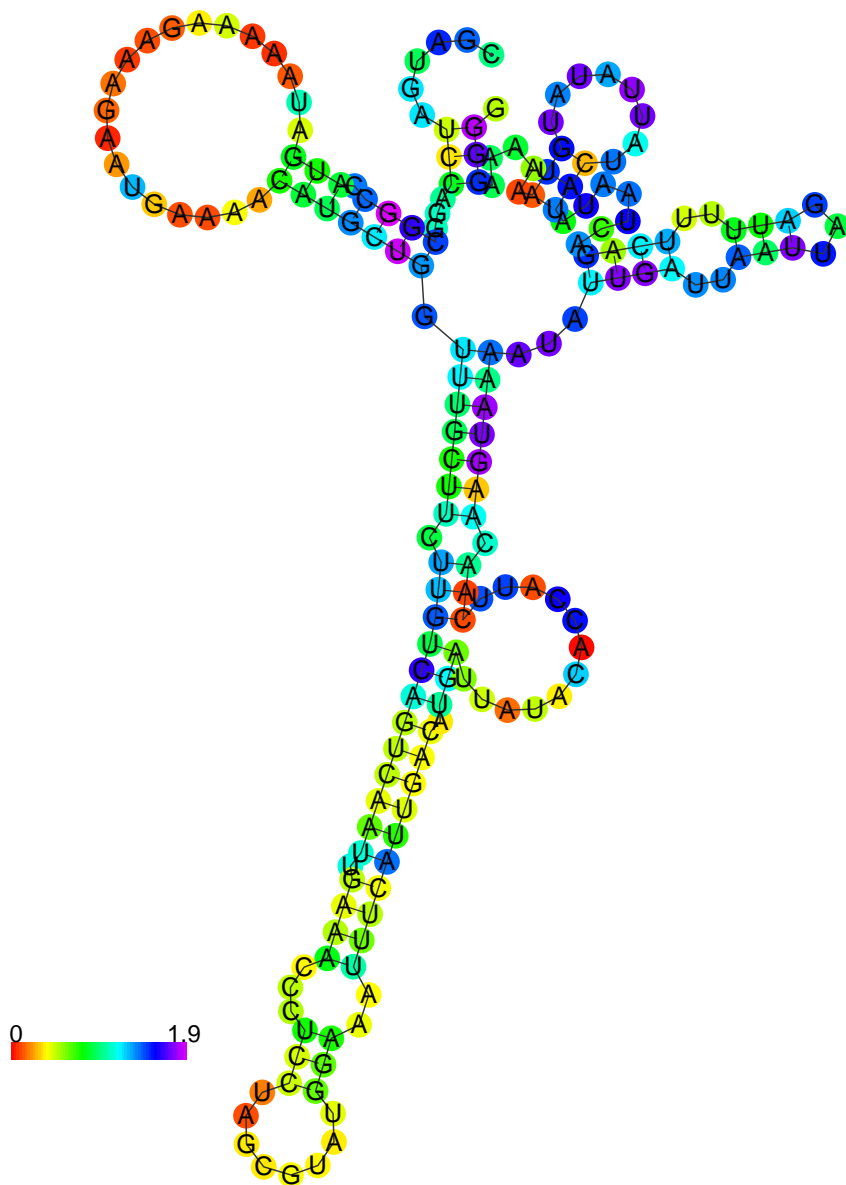

Supplement: Supplementary file 443 [file supplementary]

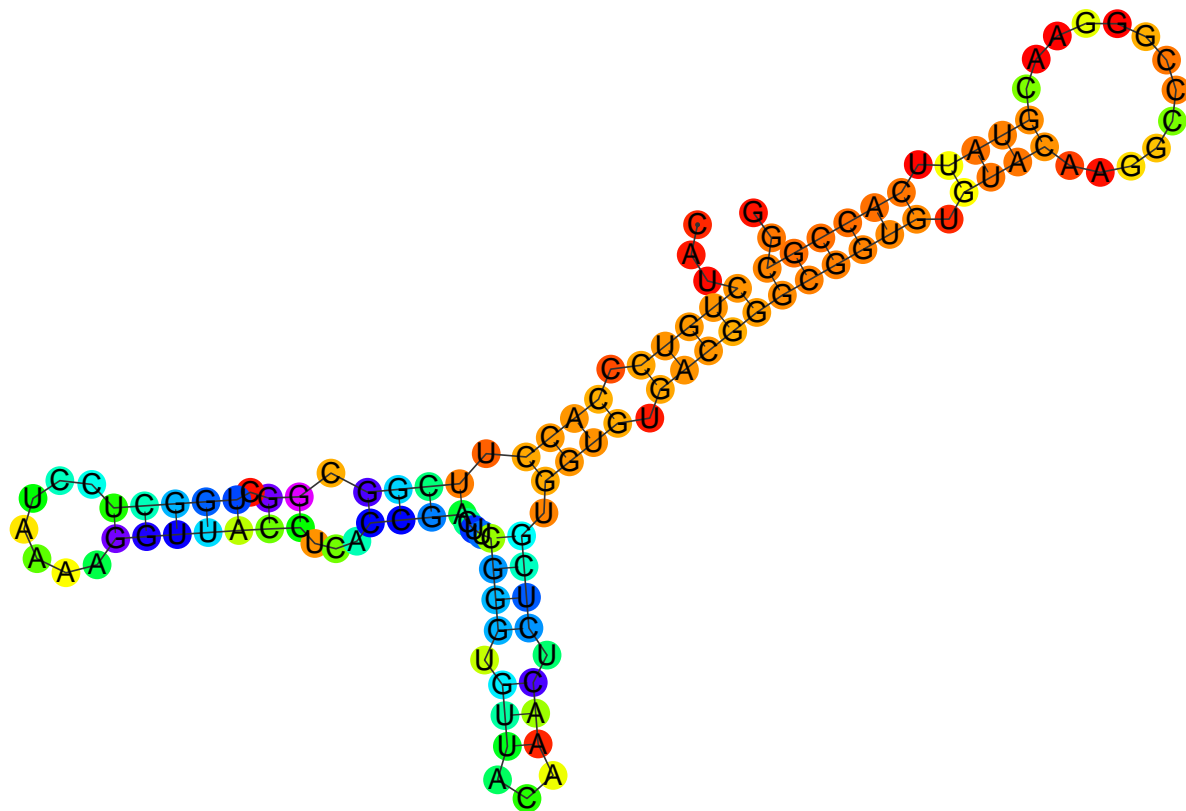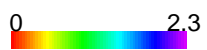

Supplement: Supplementary file 444 [file supplementary]

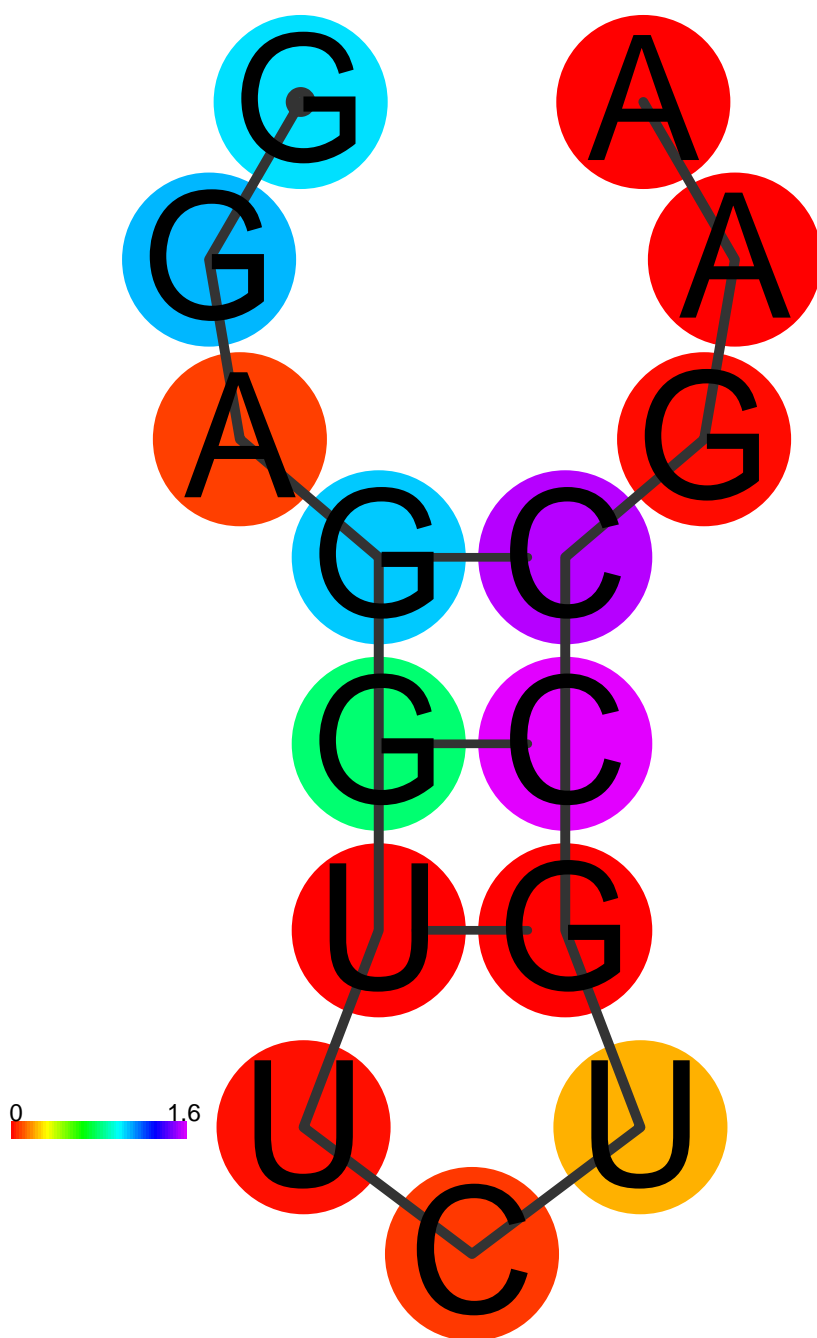

Supplement: Supplementary file 445 [file supplementary]



Supplement: Supplementary file 446 [file supplementary]

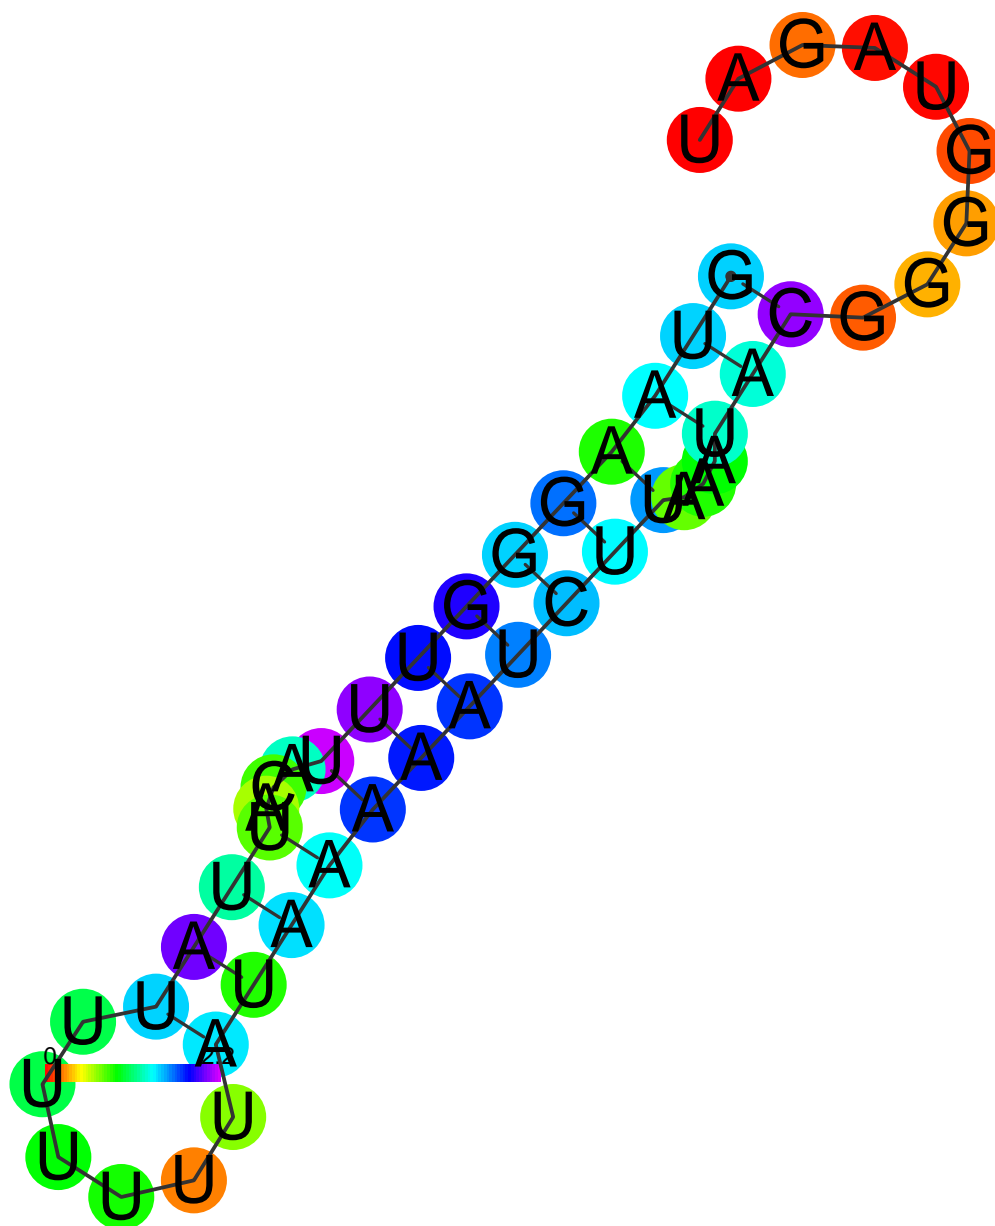

Supplement: Supplementary file 447 [file supplementary]

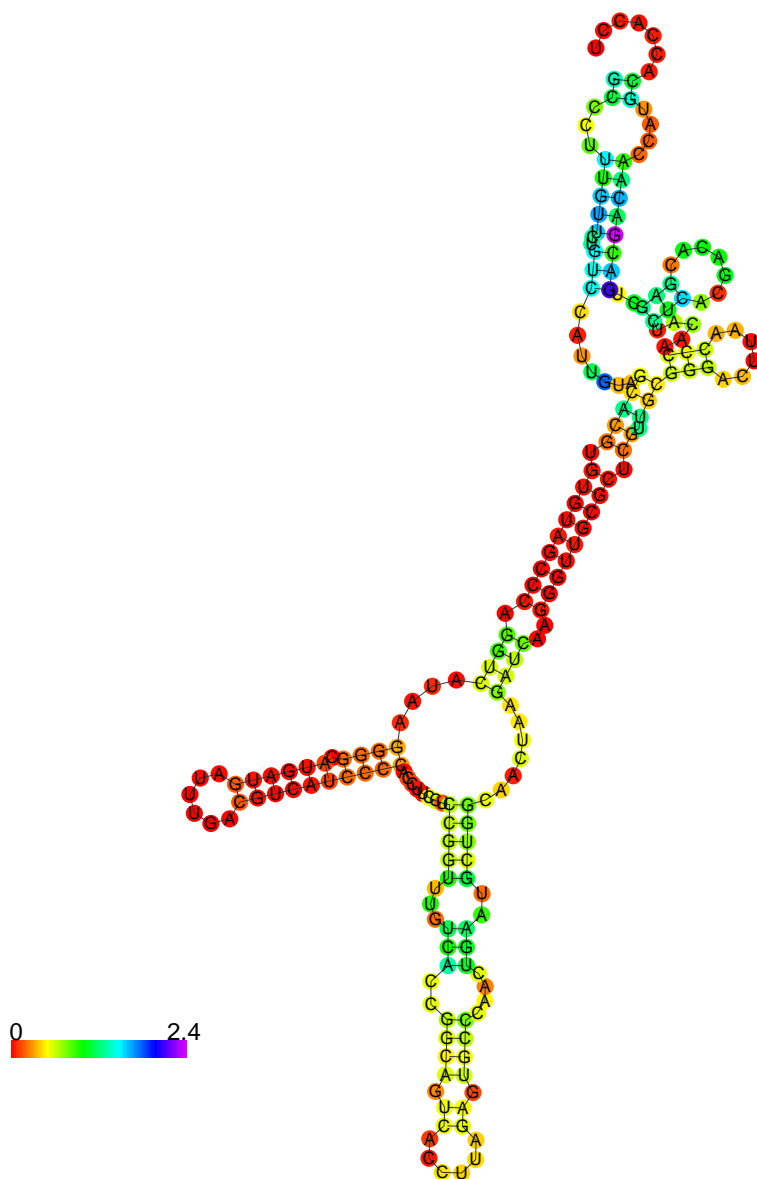

Supplement: Supplementary file 448 [file supplementary]

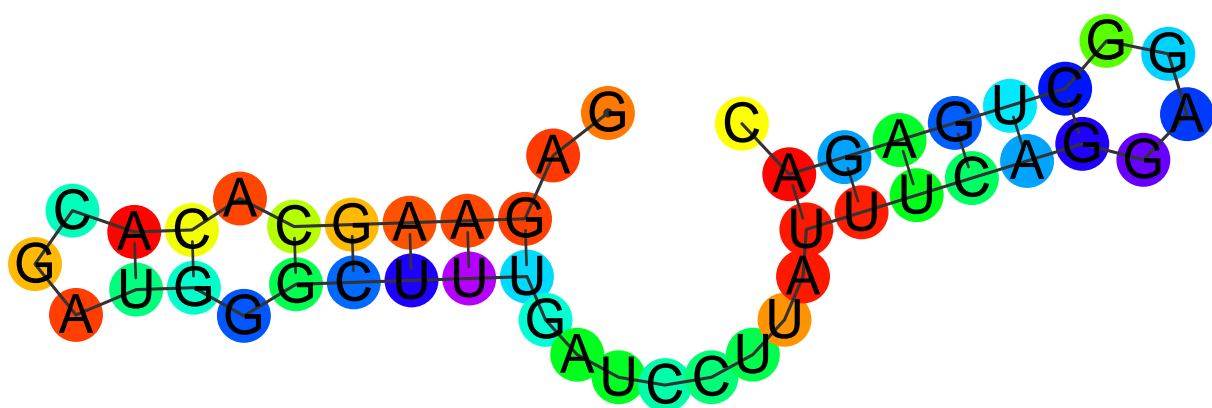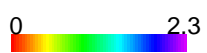

Supplement: Supplementary file 449 [file supplementary]

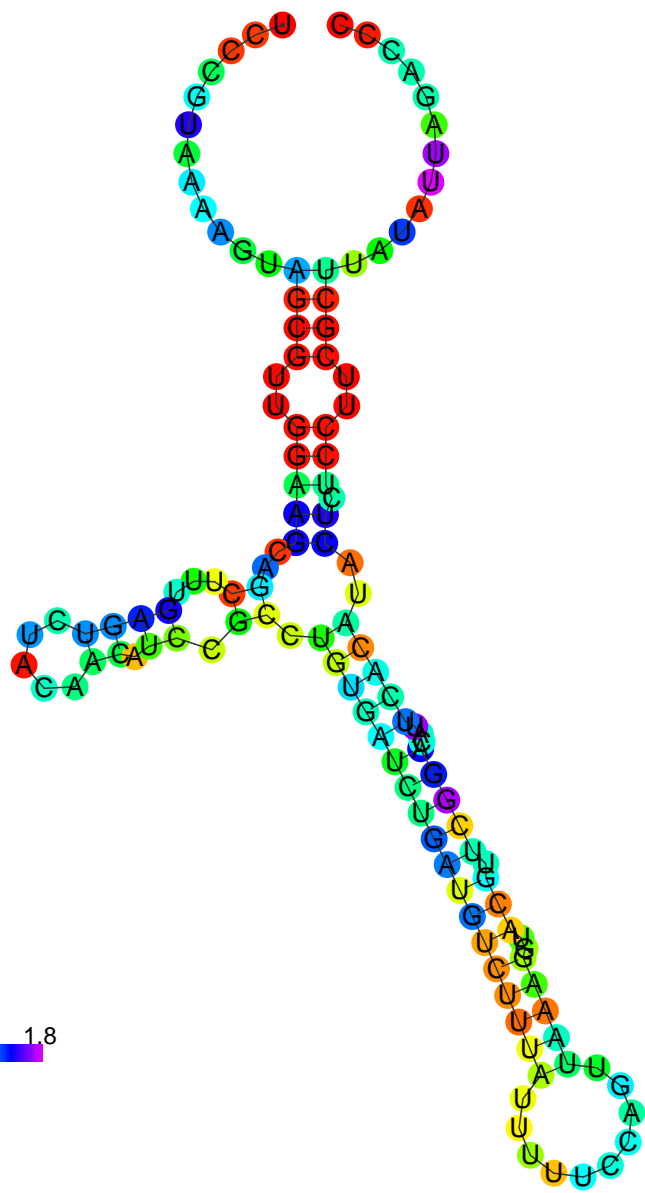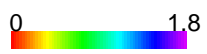

Supplement: Supplementary file 450 [file supplementary]



Supplement: Supplementary file 451 [file supplementary]

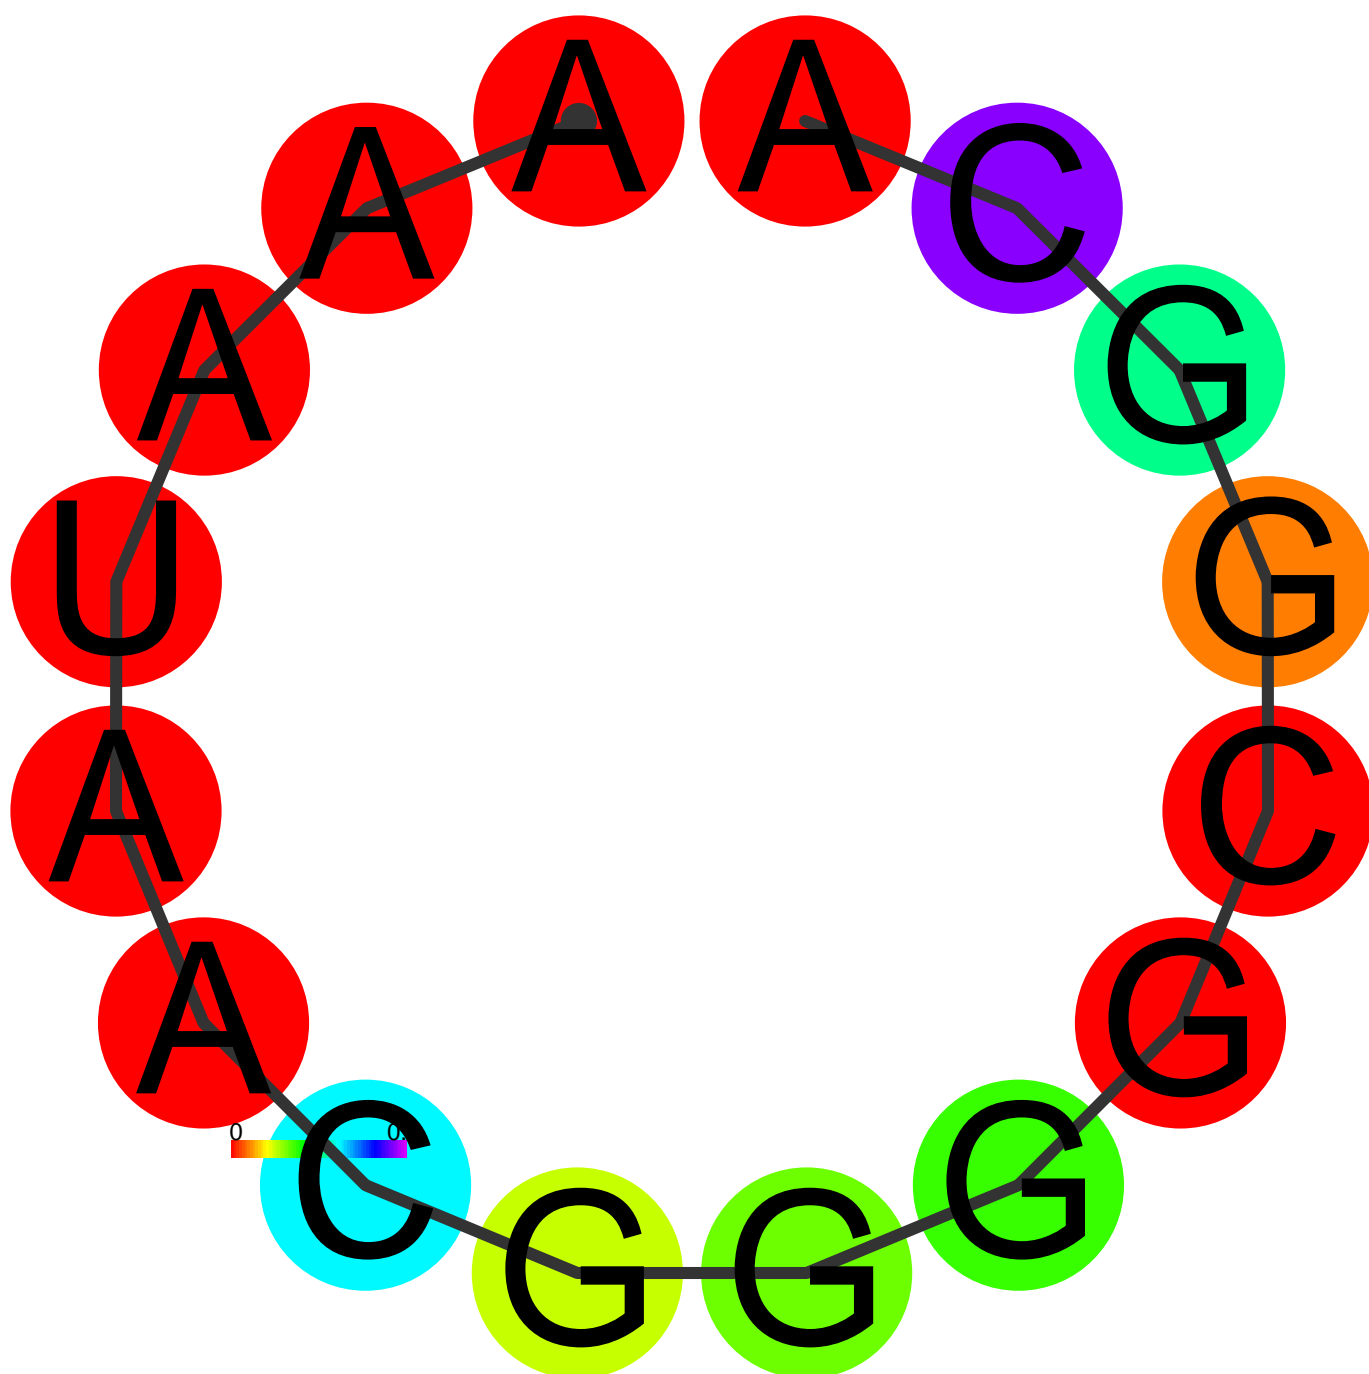

Supplement: Supplementary file 452 [file supplementary]

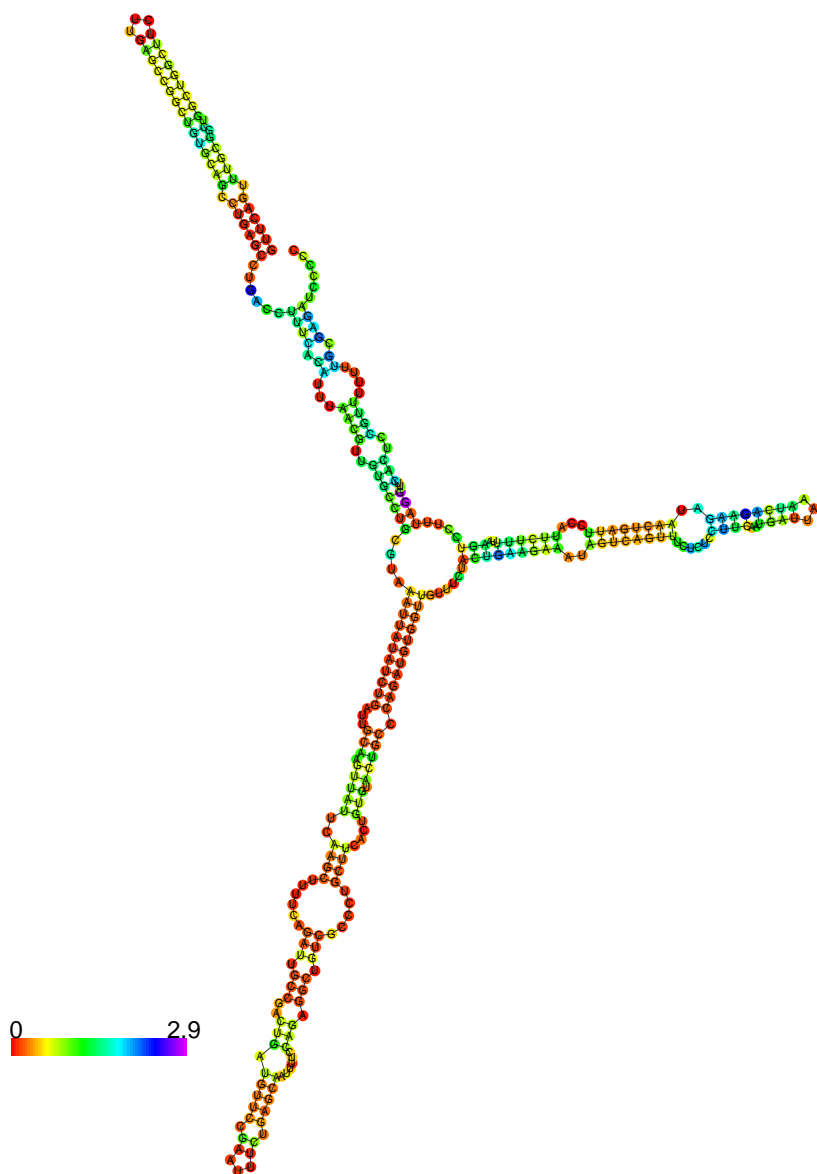

Supplement: Supplementary file 453 [file supplementary]

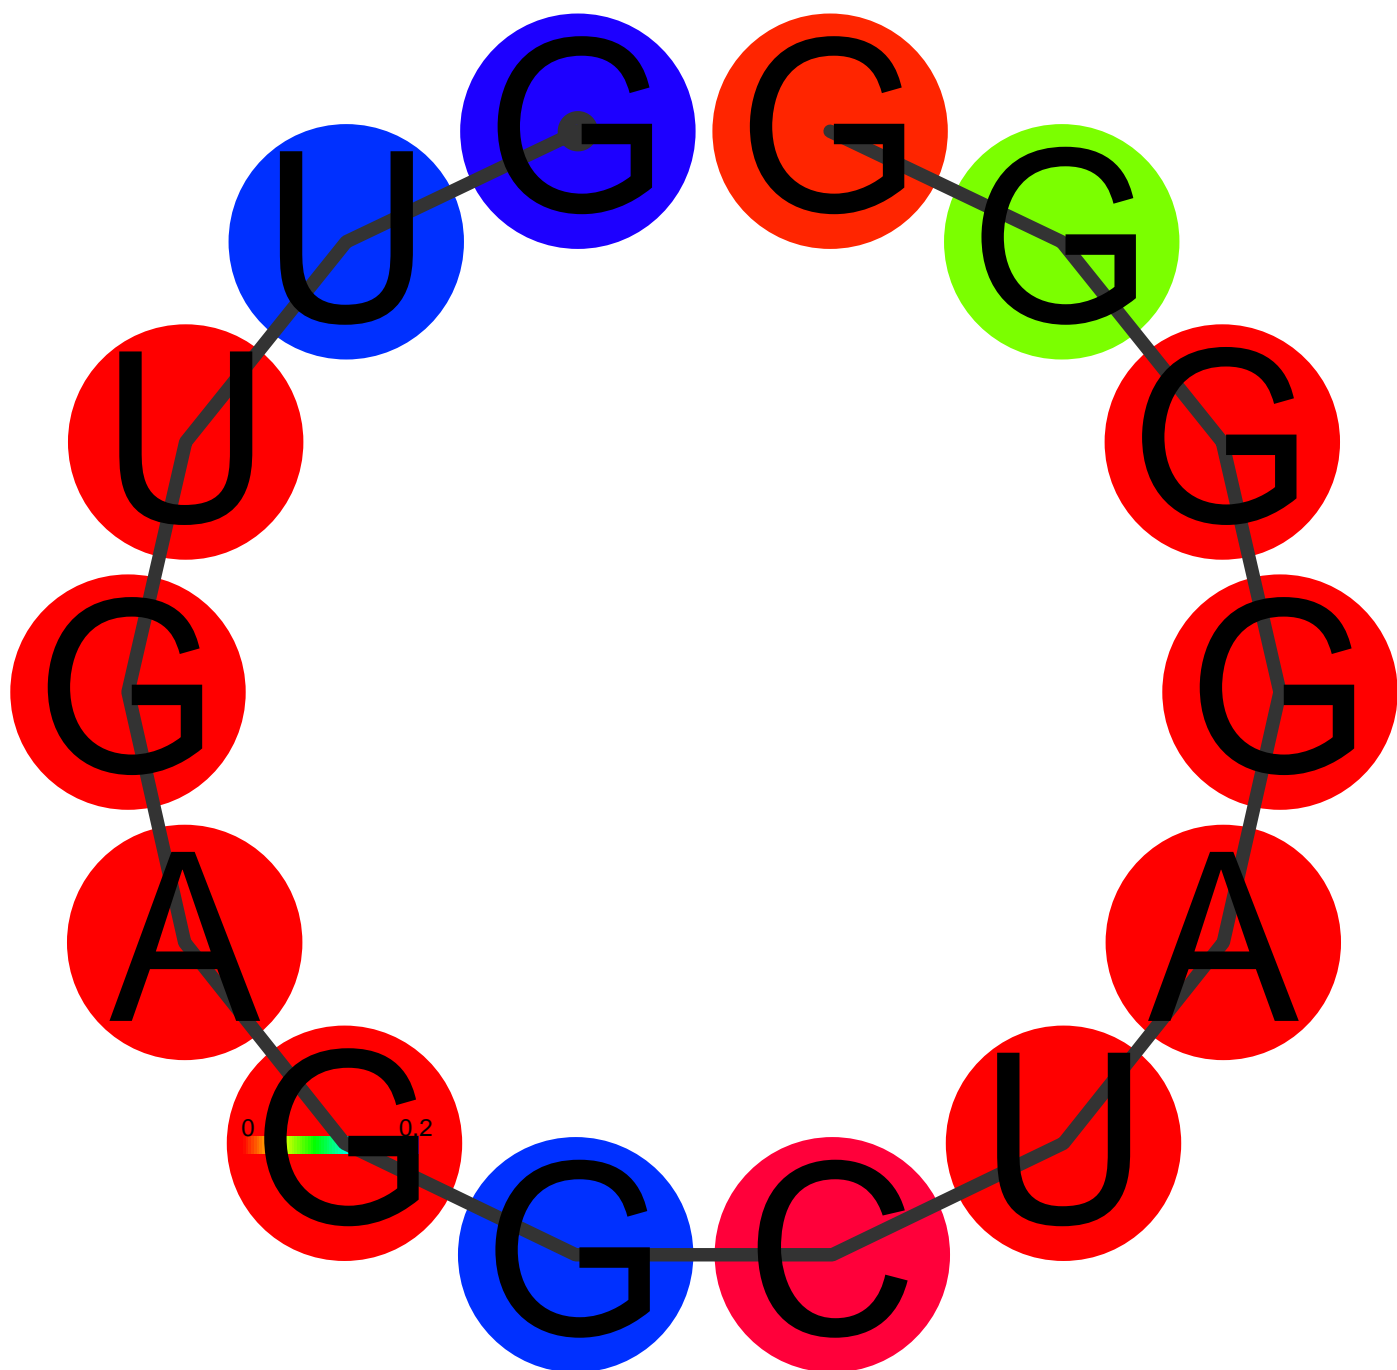

Supplement: Supplementary file 454 [file supplementary]

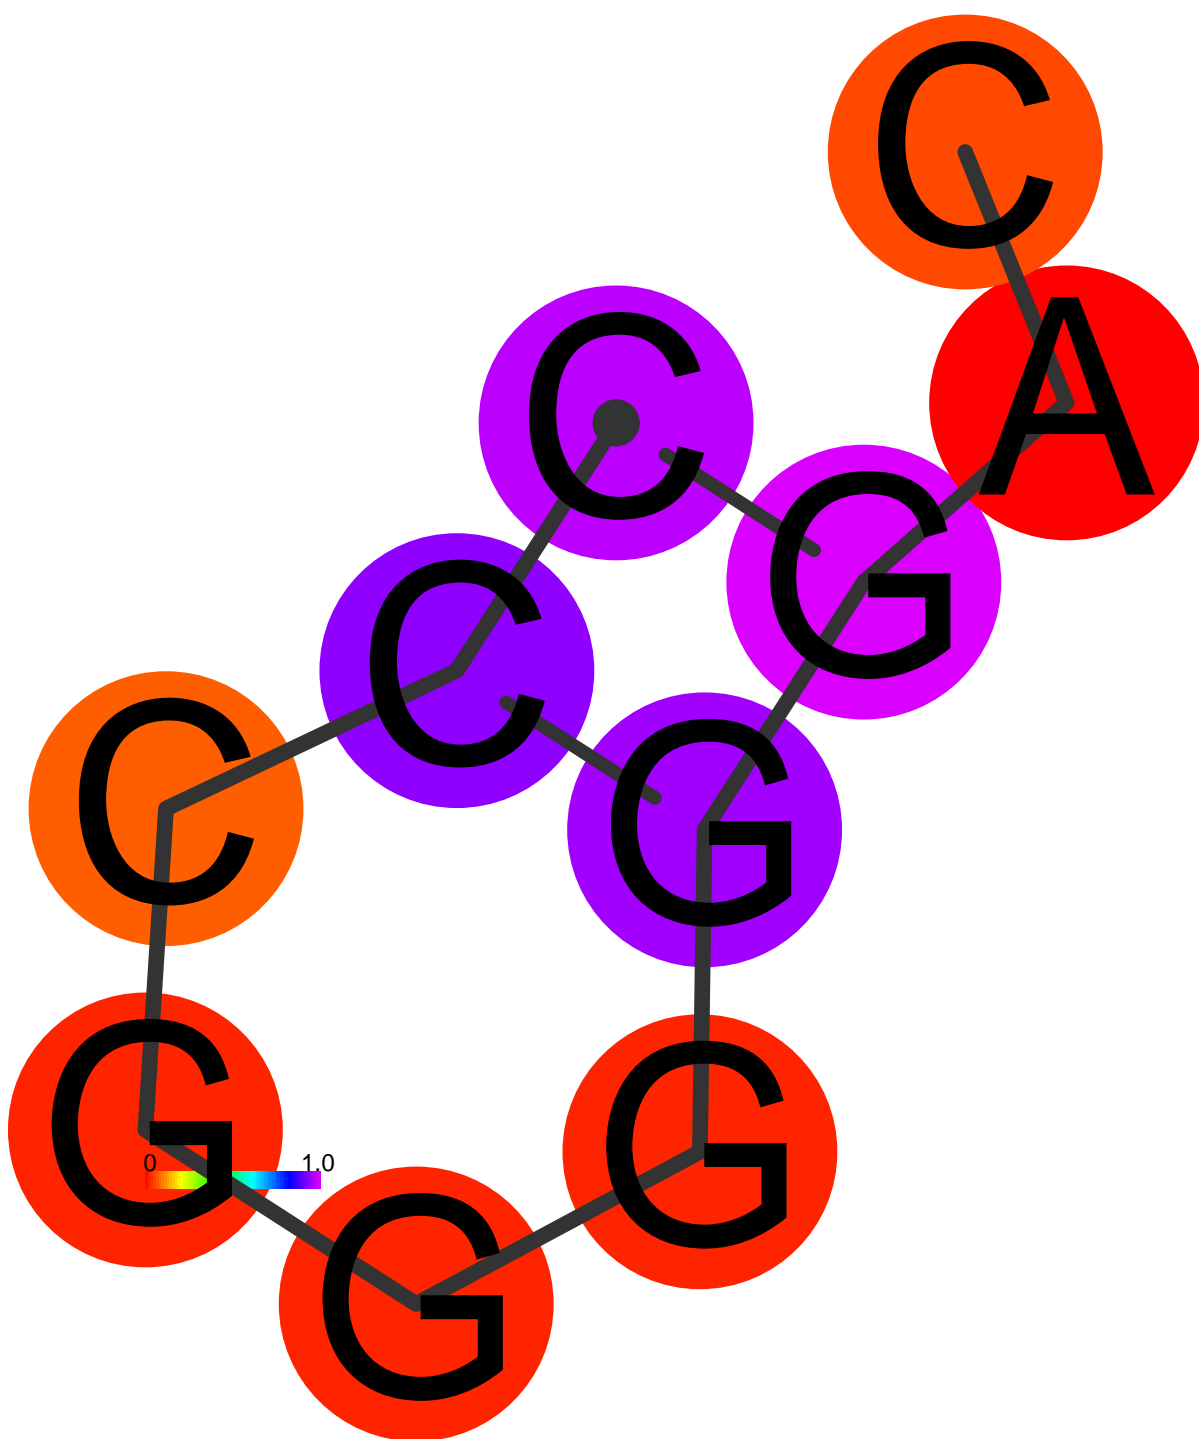

Supplement: Supplementary file 455 [file supplementary]

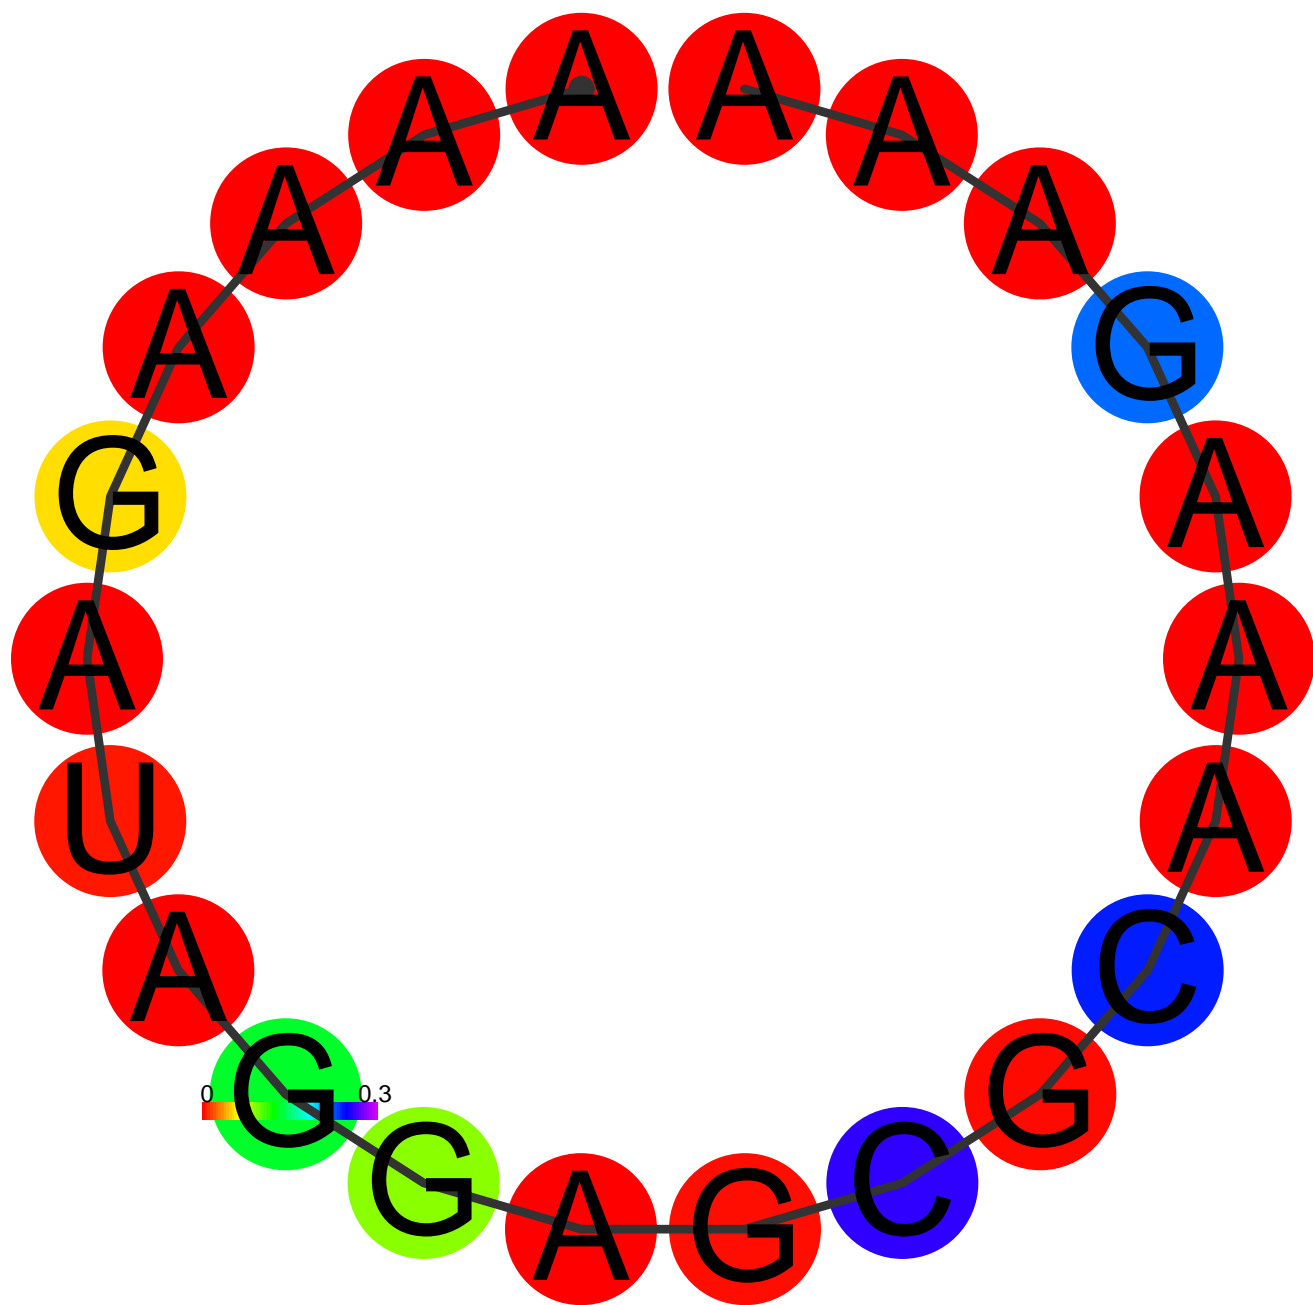

Supplement: Supplementary file 456 [file supplementary]

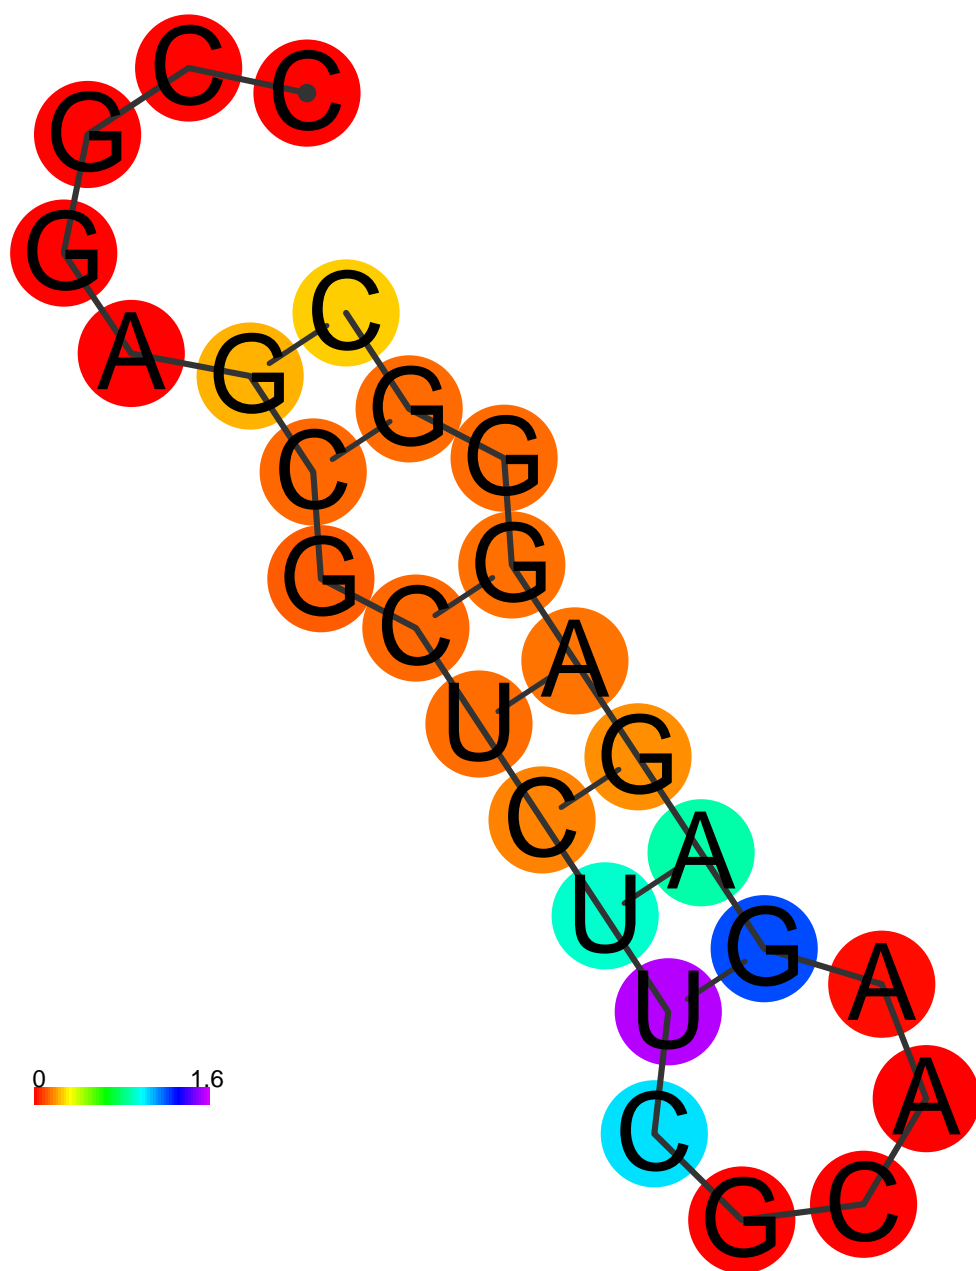

Supplement: Supplementary file 457 [file supplementary]

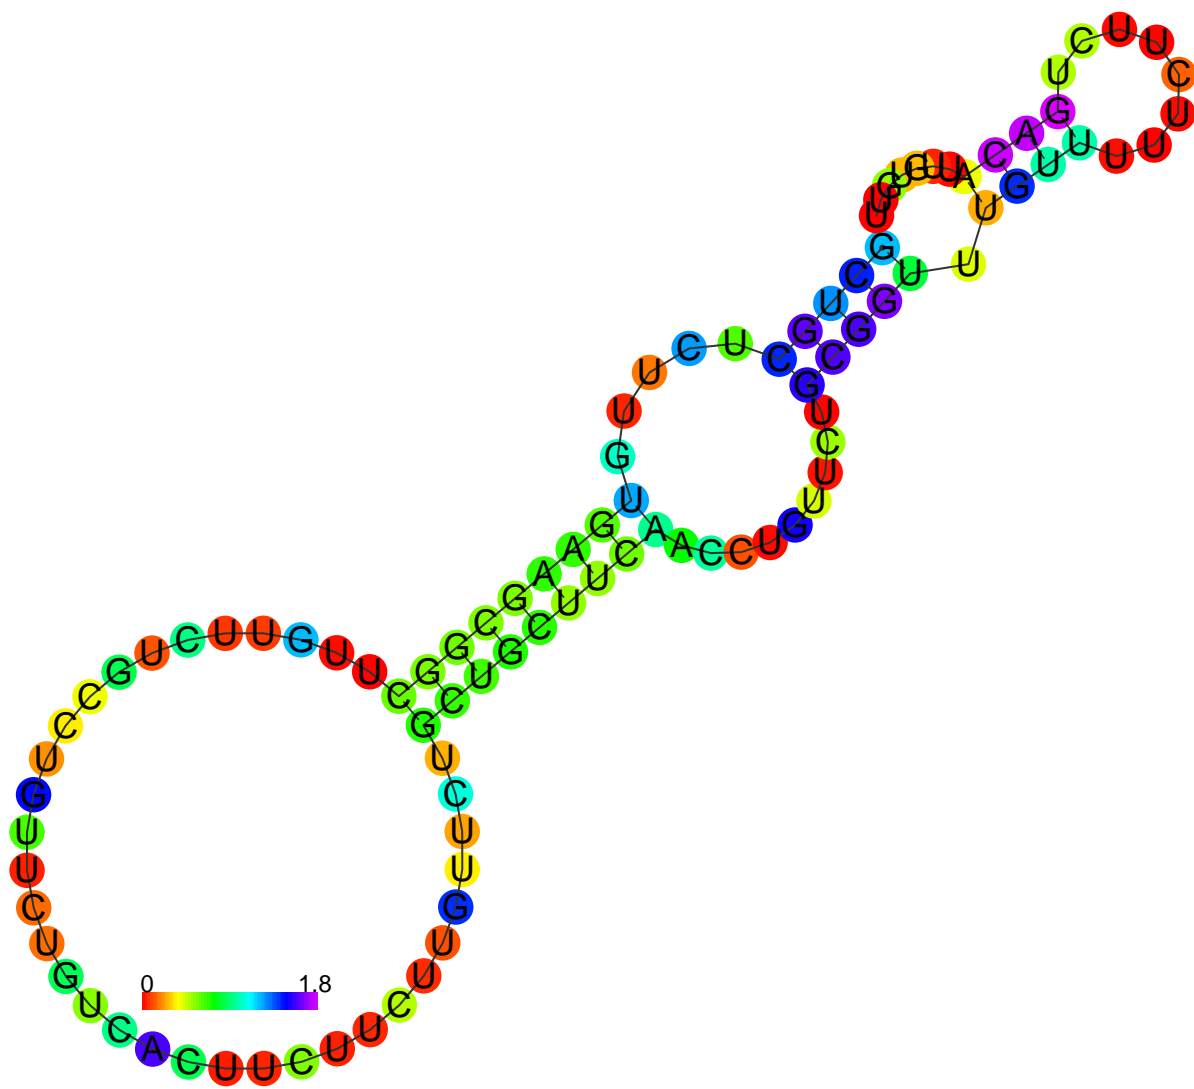

Supplement: Supplementary file 458 [file supplementary]

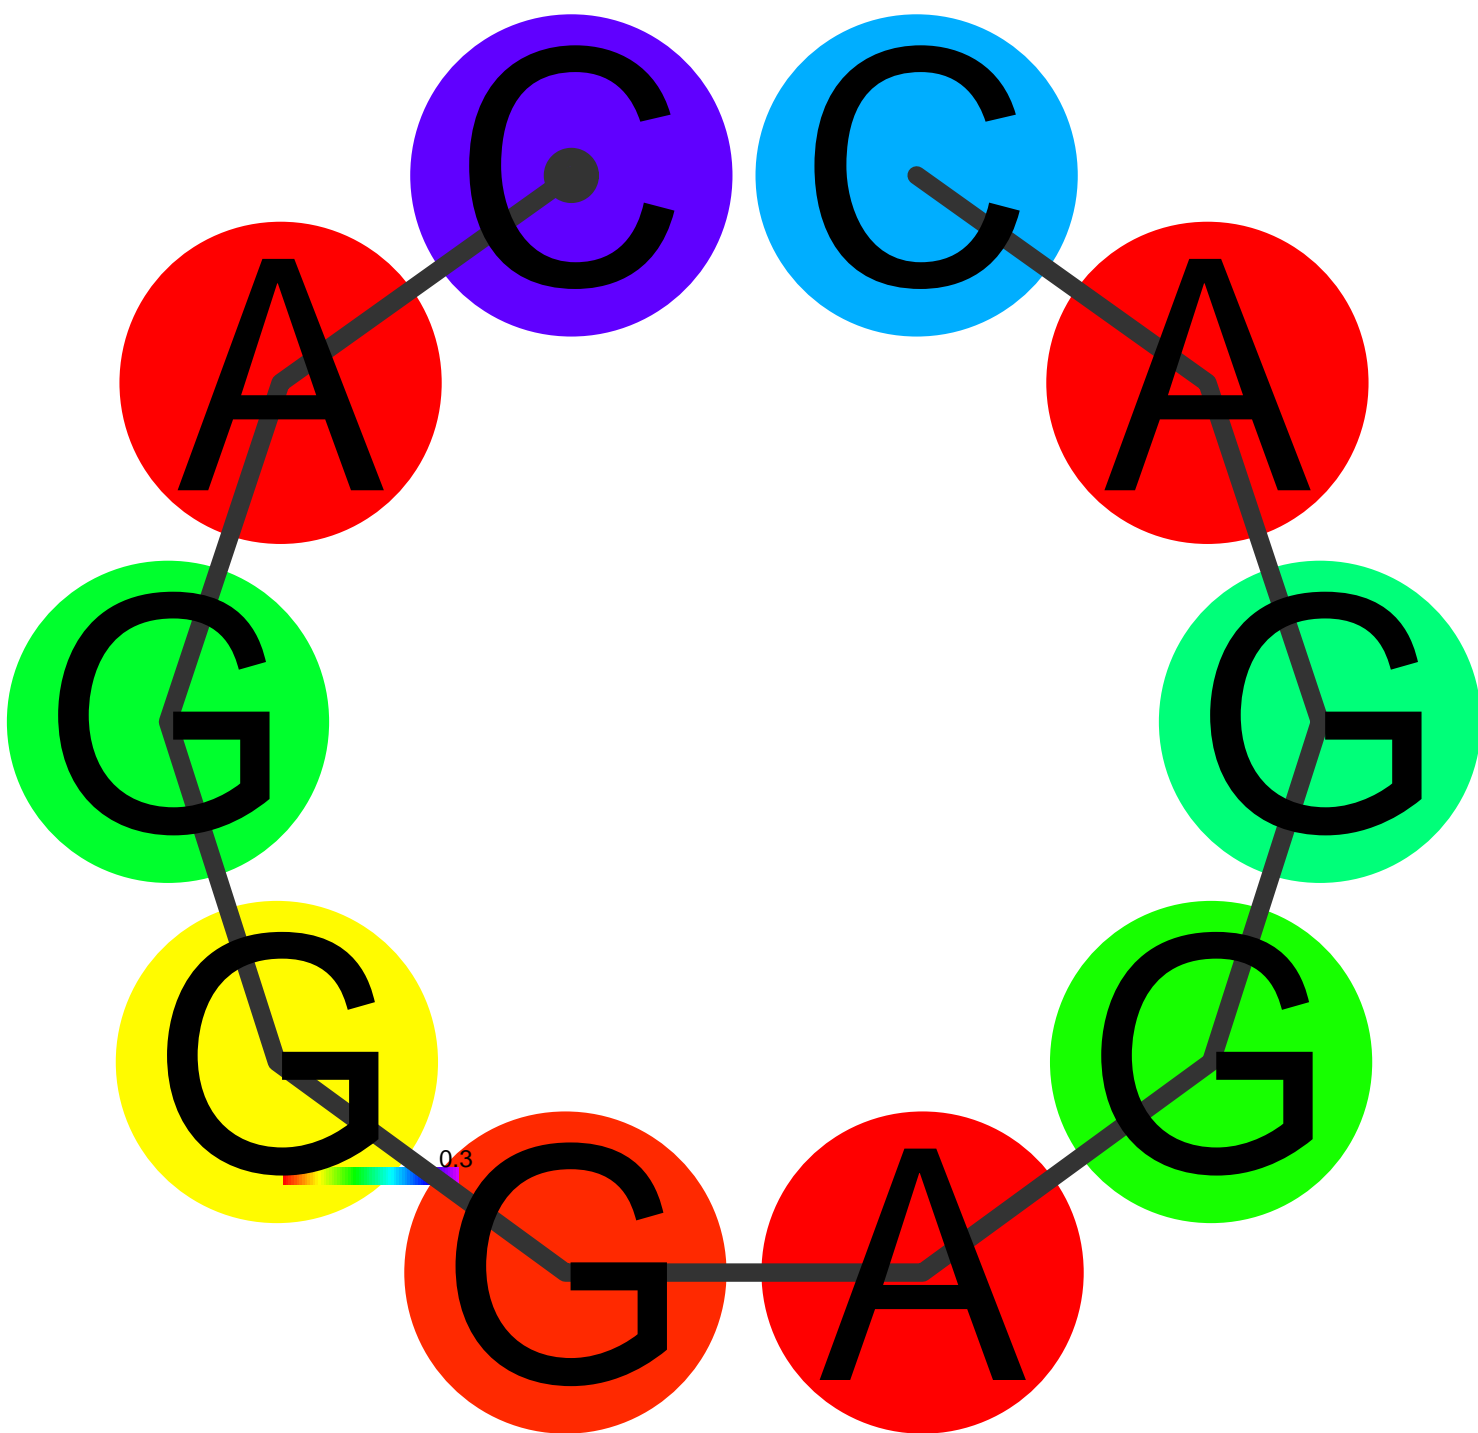

Supplement: Supplementary file 459 [file supplementary]

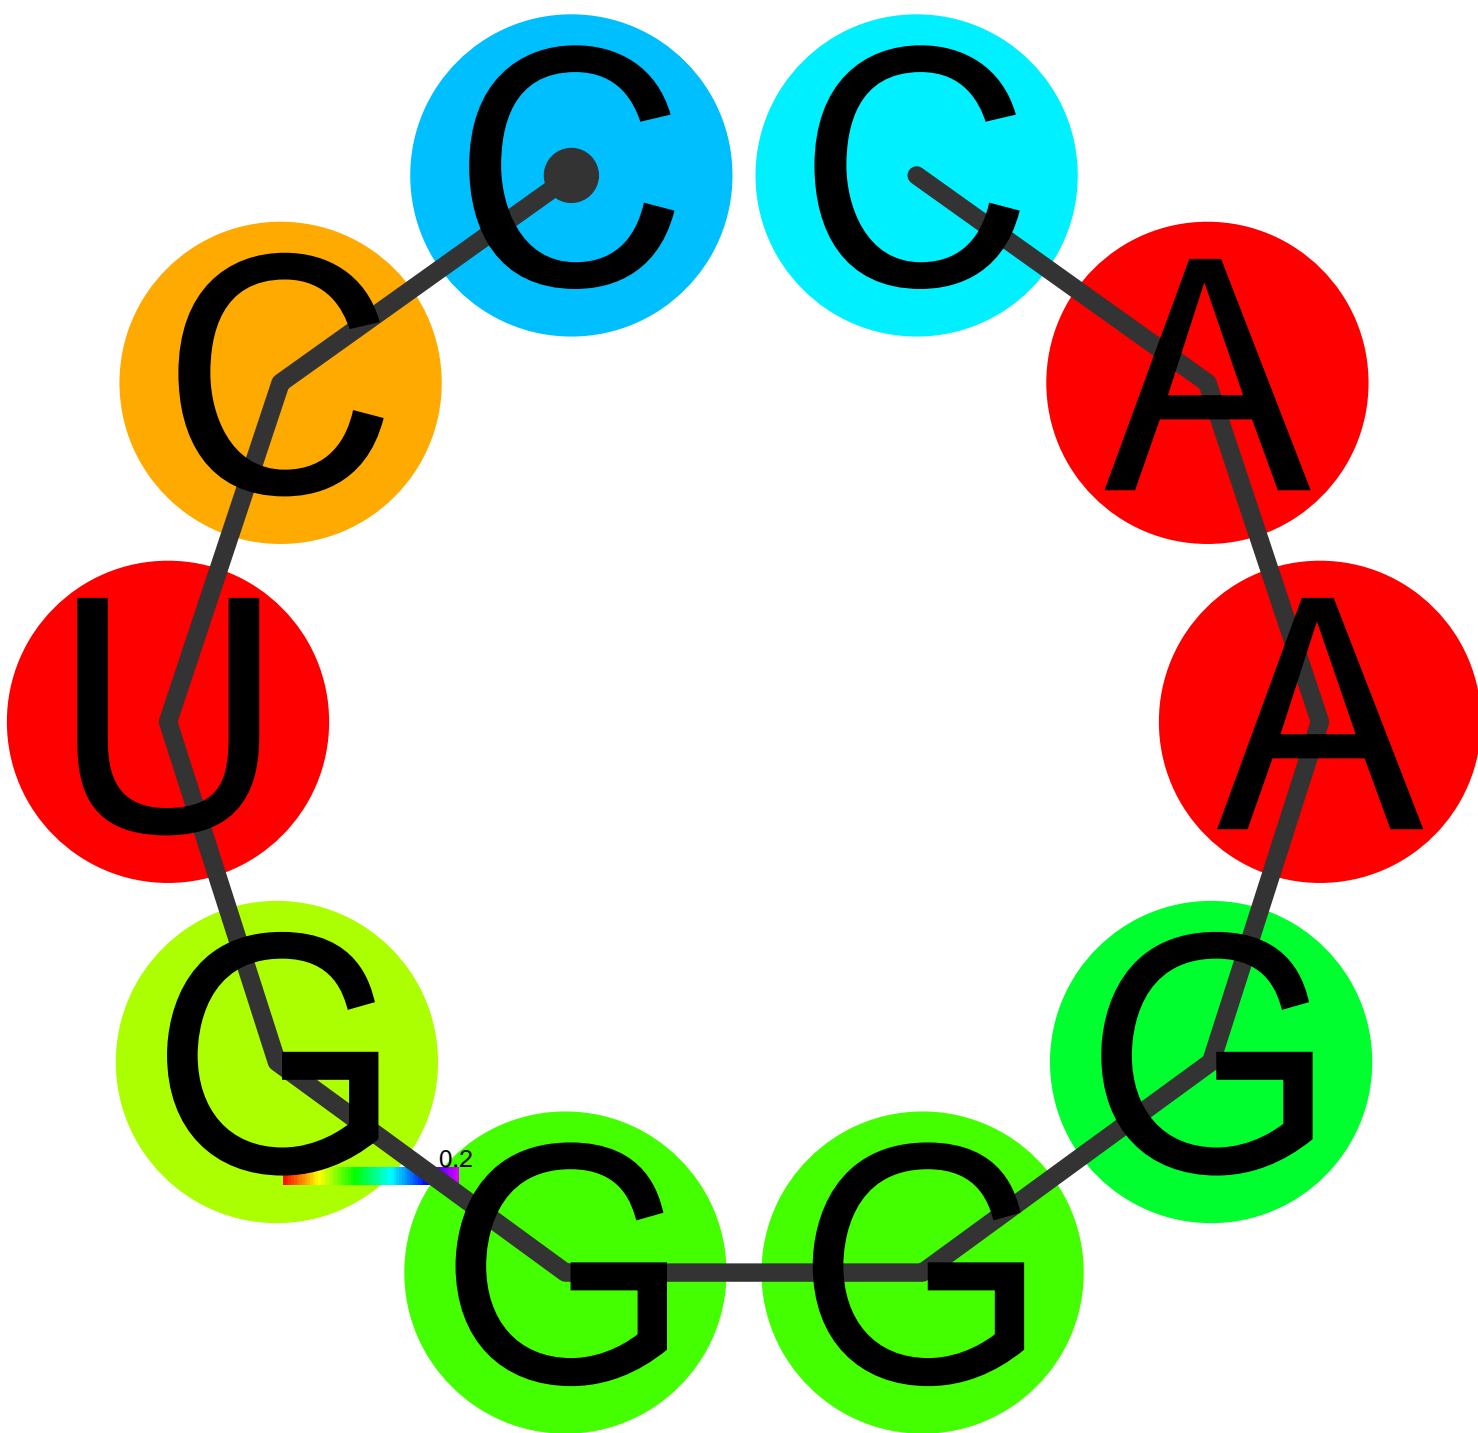

Supplement: Supplementary file 460 [file supplementary]

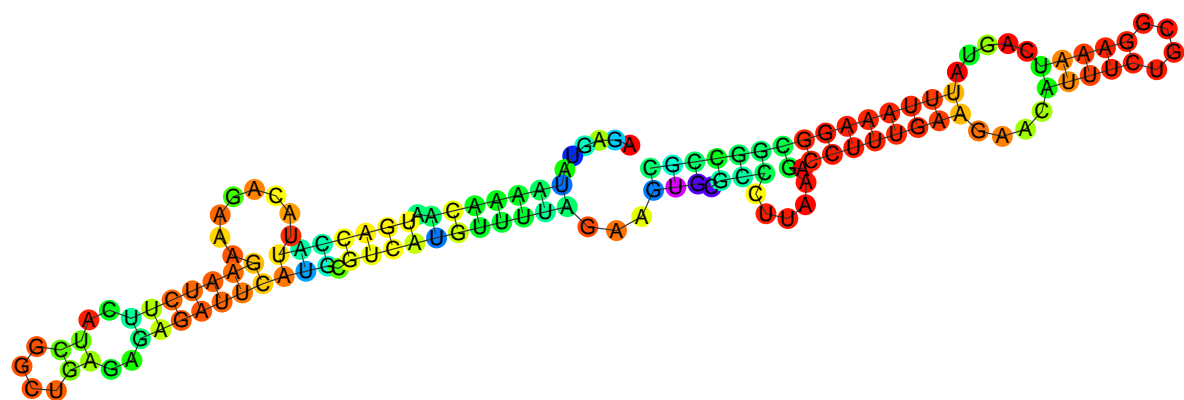

Supplement: Supplementary file 461 [file supplementary]

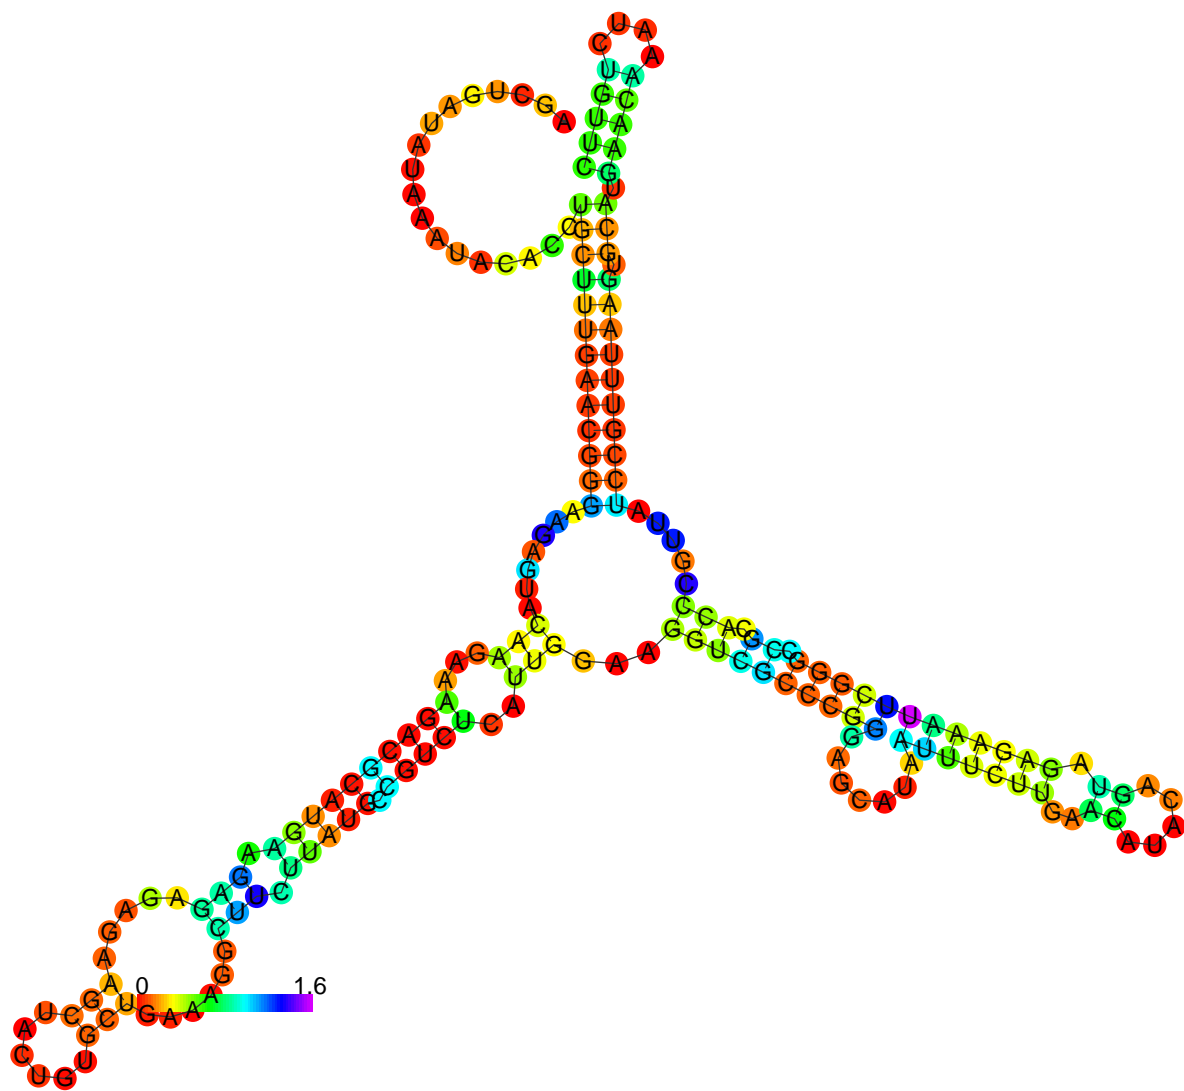

Supplement: Supplementary file 462 [file supplementary]

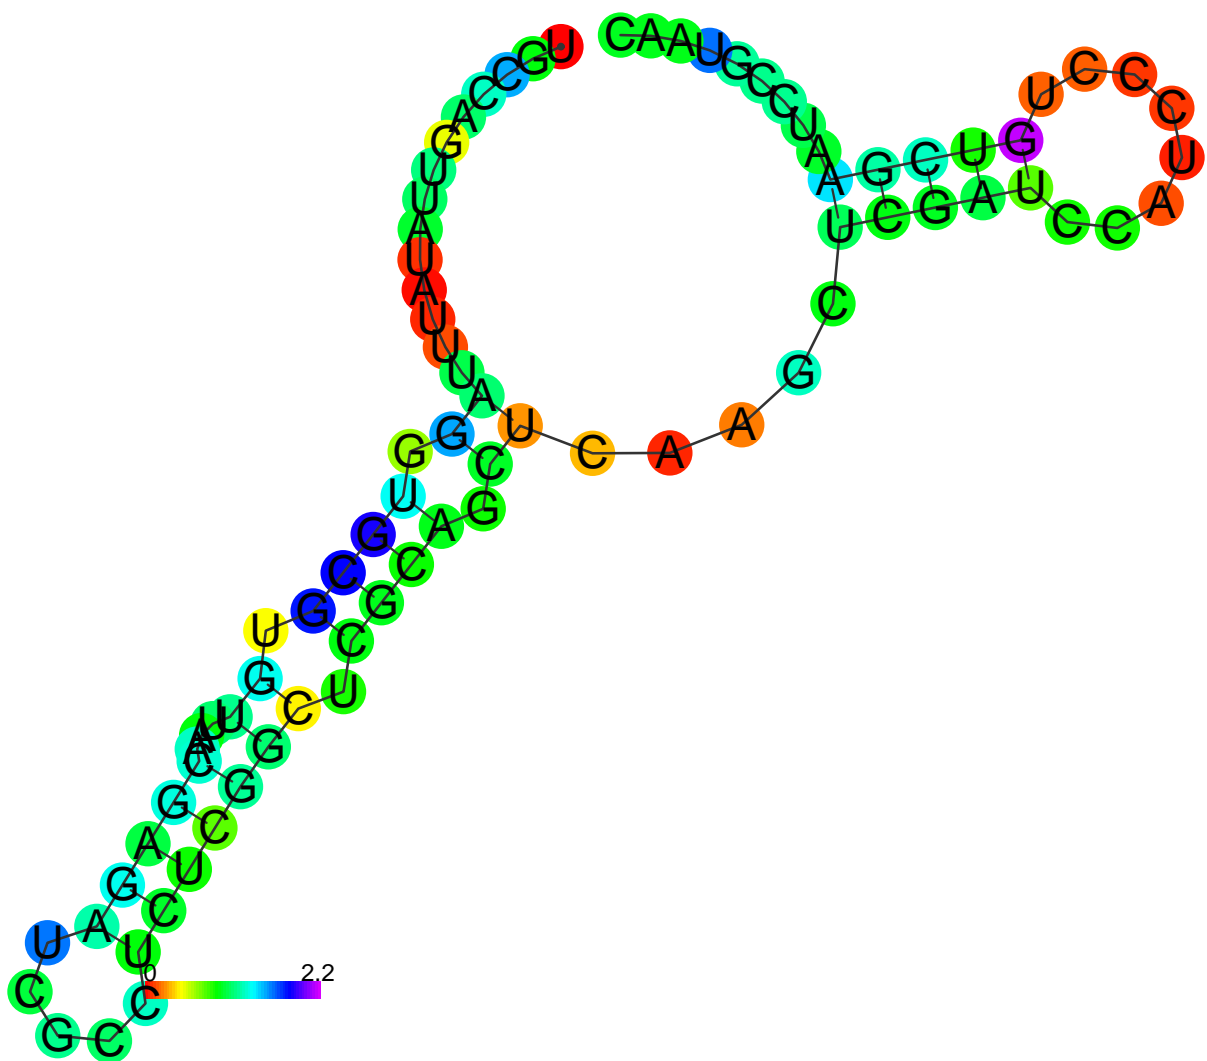

Supplement: Supplementary file 463 [file supplementary]

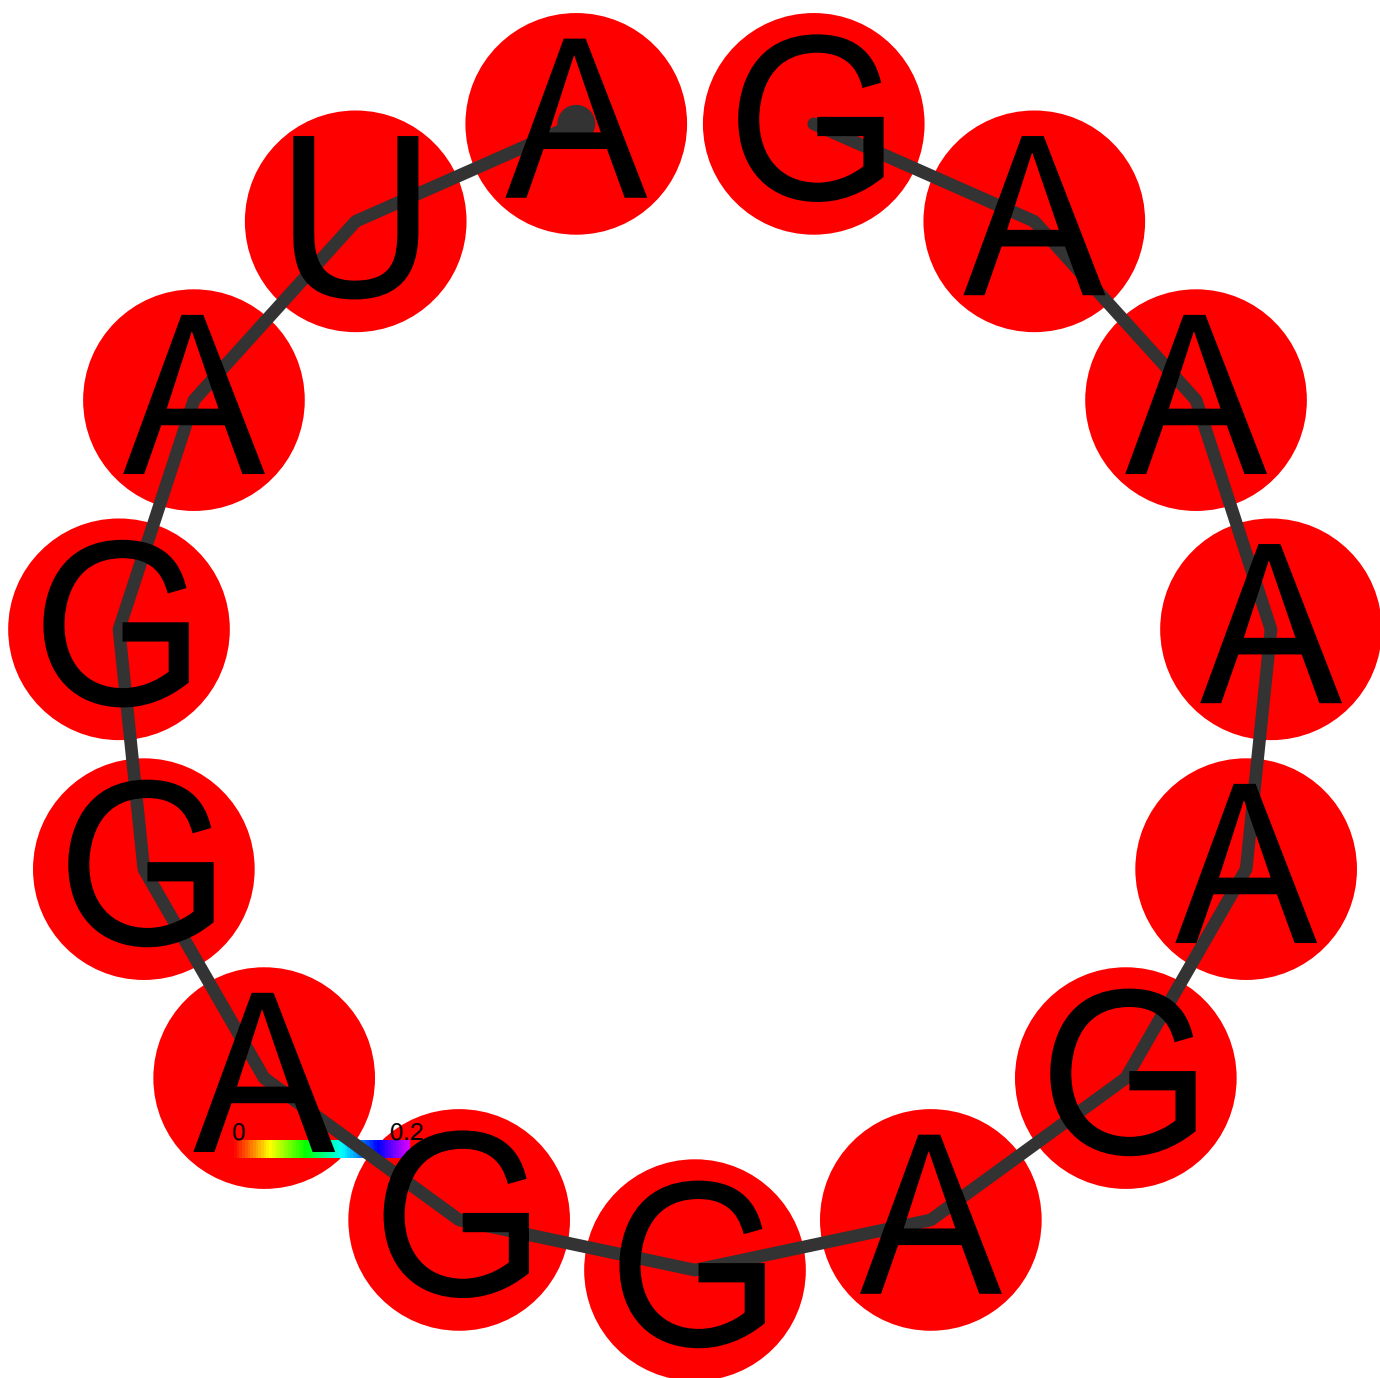

Supplement: Supplementary file 464 [file supplementary]

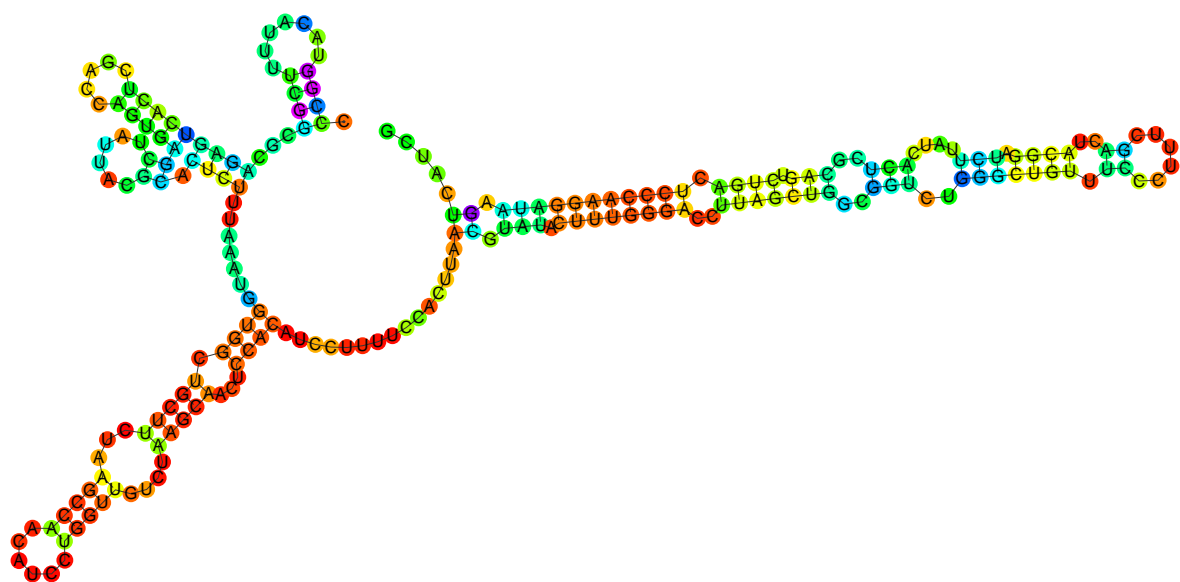

Supplement: Supplementary file 465 [file supplementary]

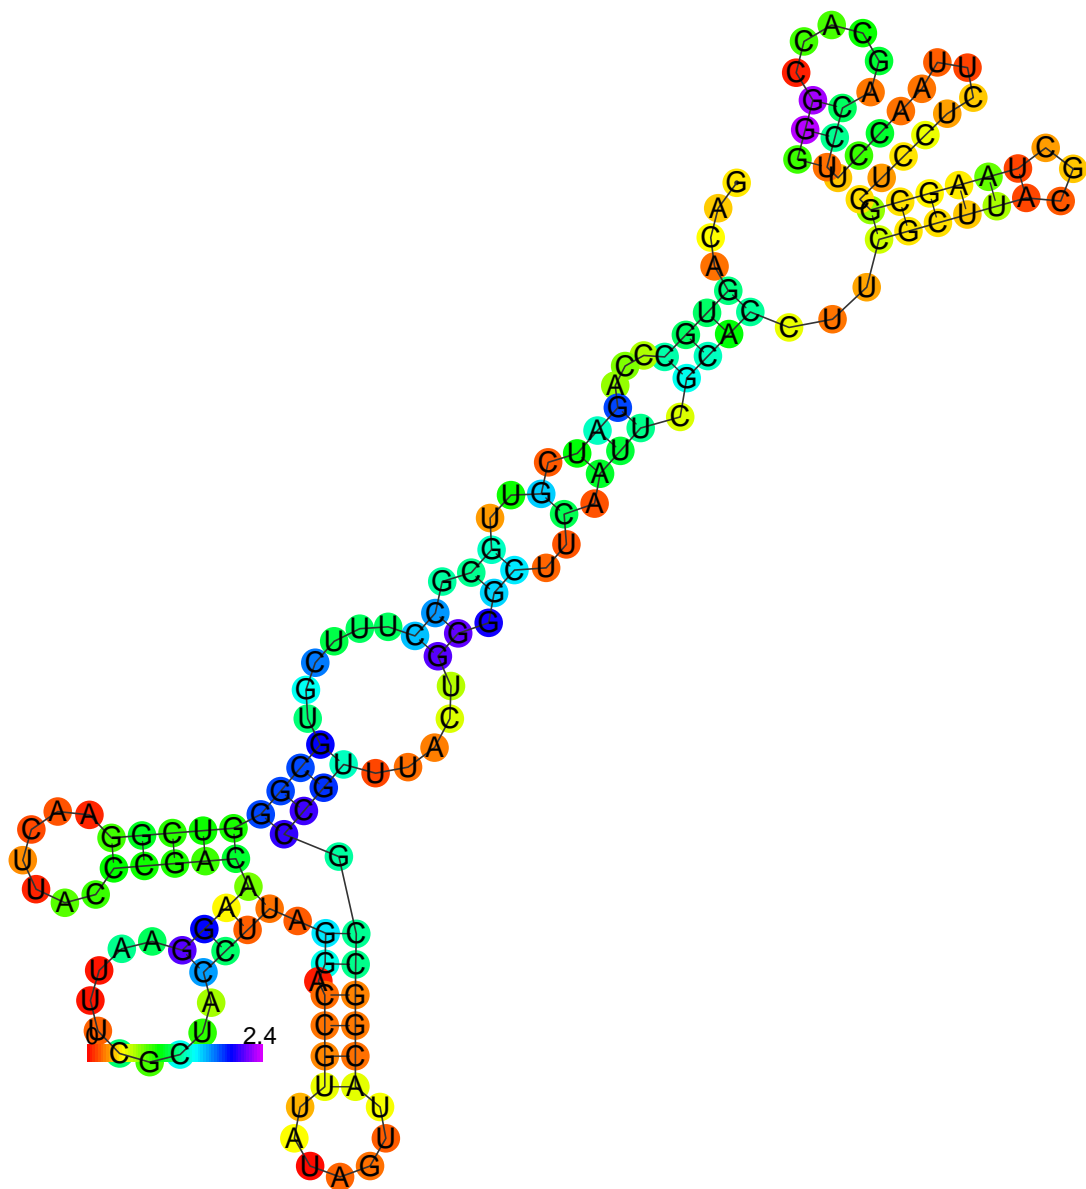

Supplement: Supplementary file 466 [file supplementary]

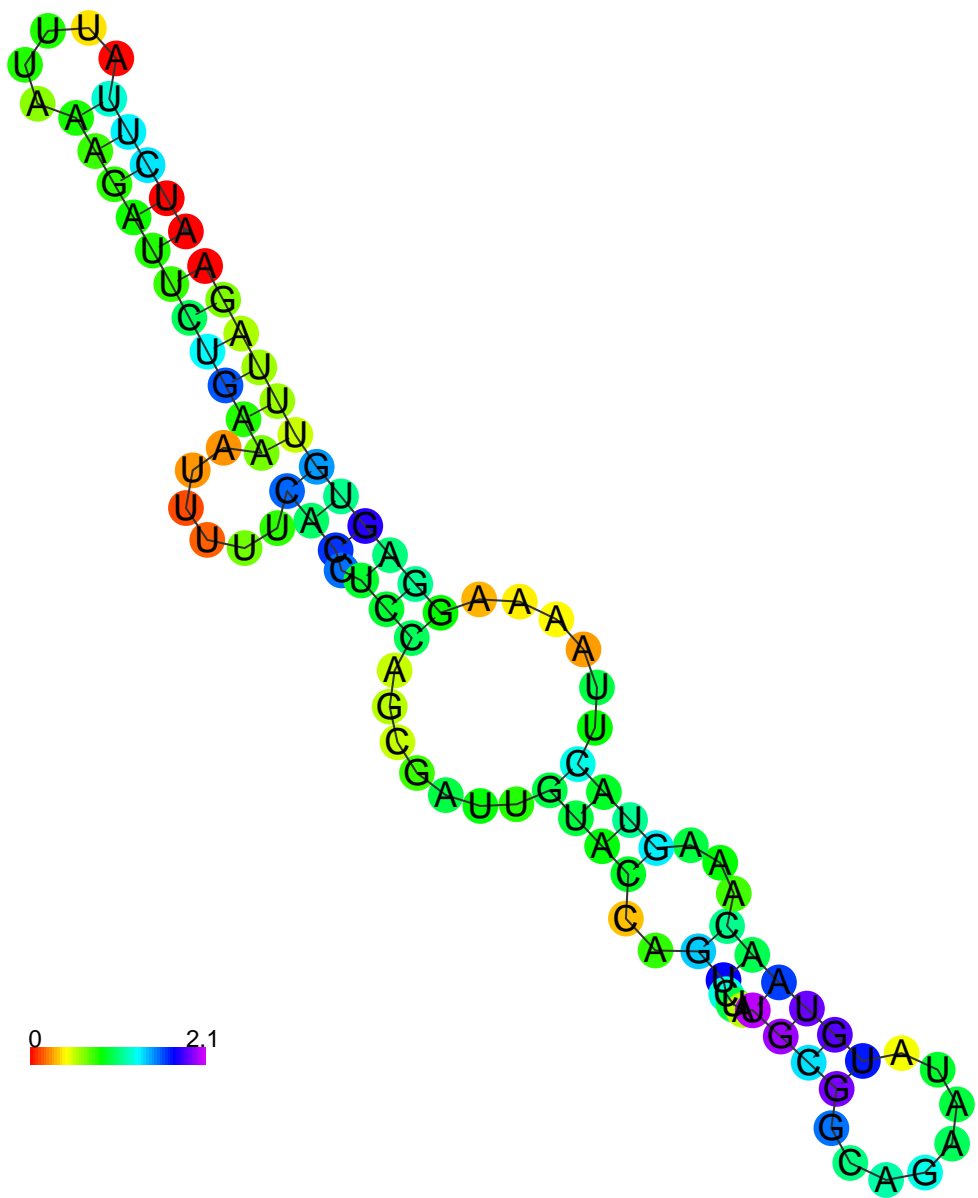

Supplement: Supplementary file 467 [file supplementary]

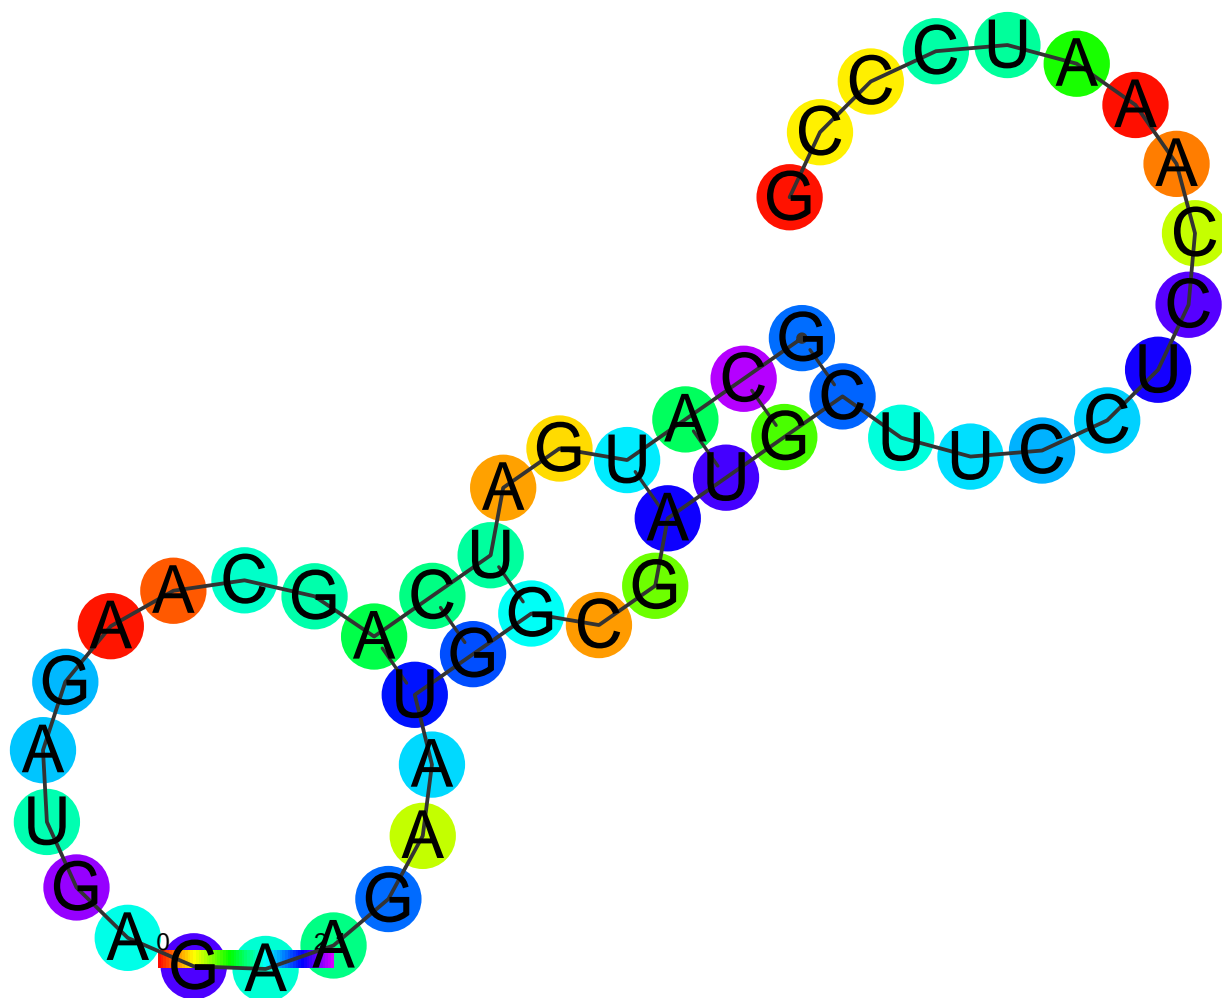

Supplement: Supplementary file 468 [file supplementary]

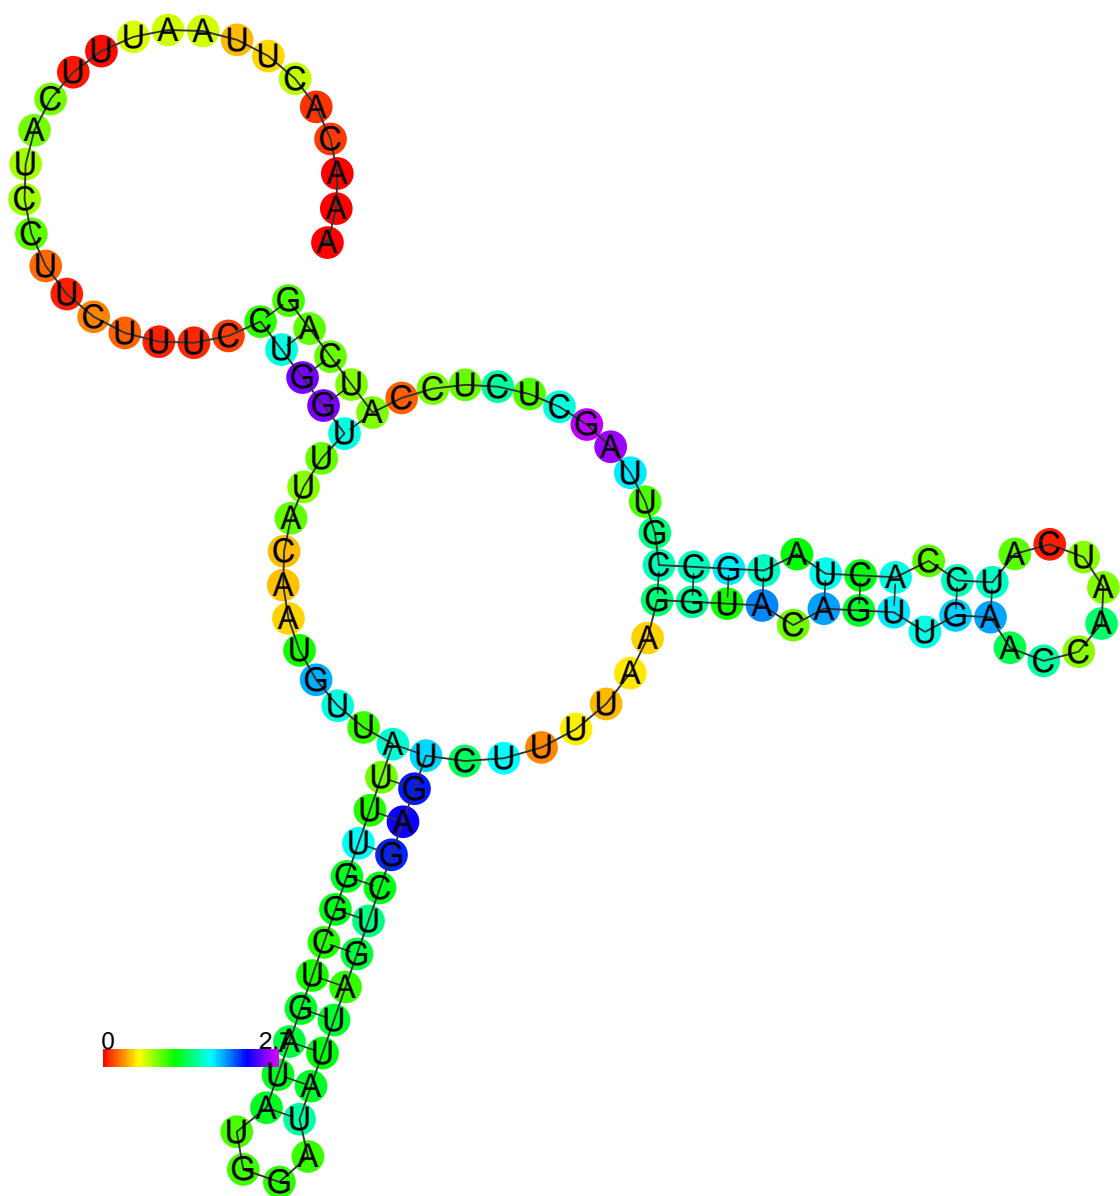

Supplement: Supplementary file 469 [file supplementary]

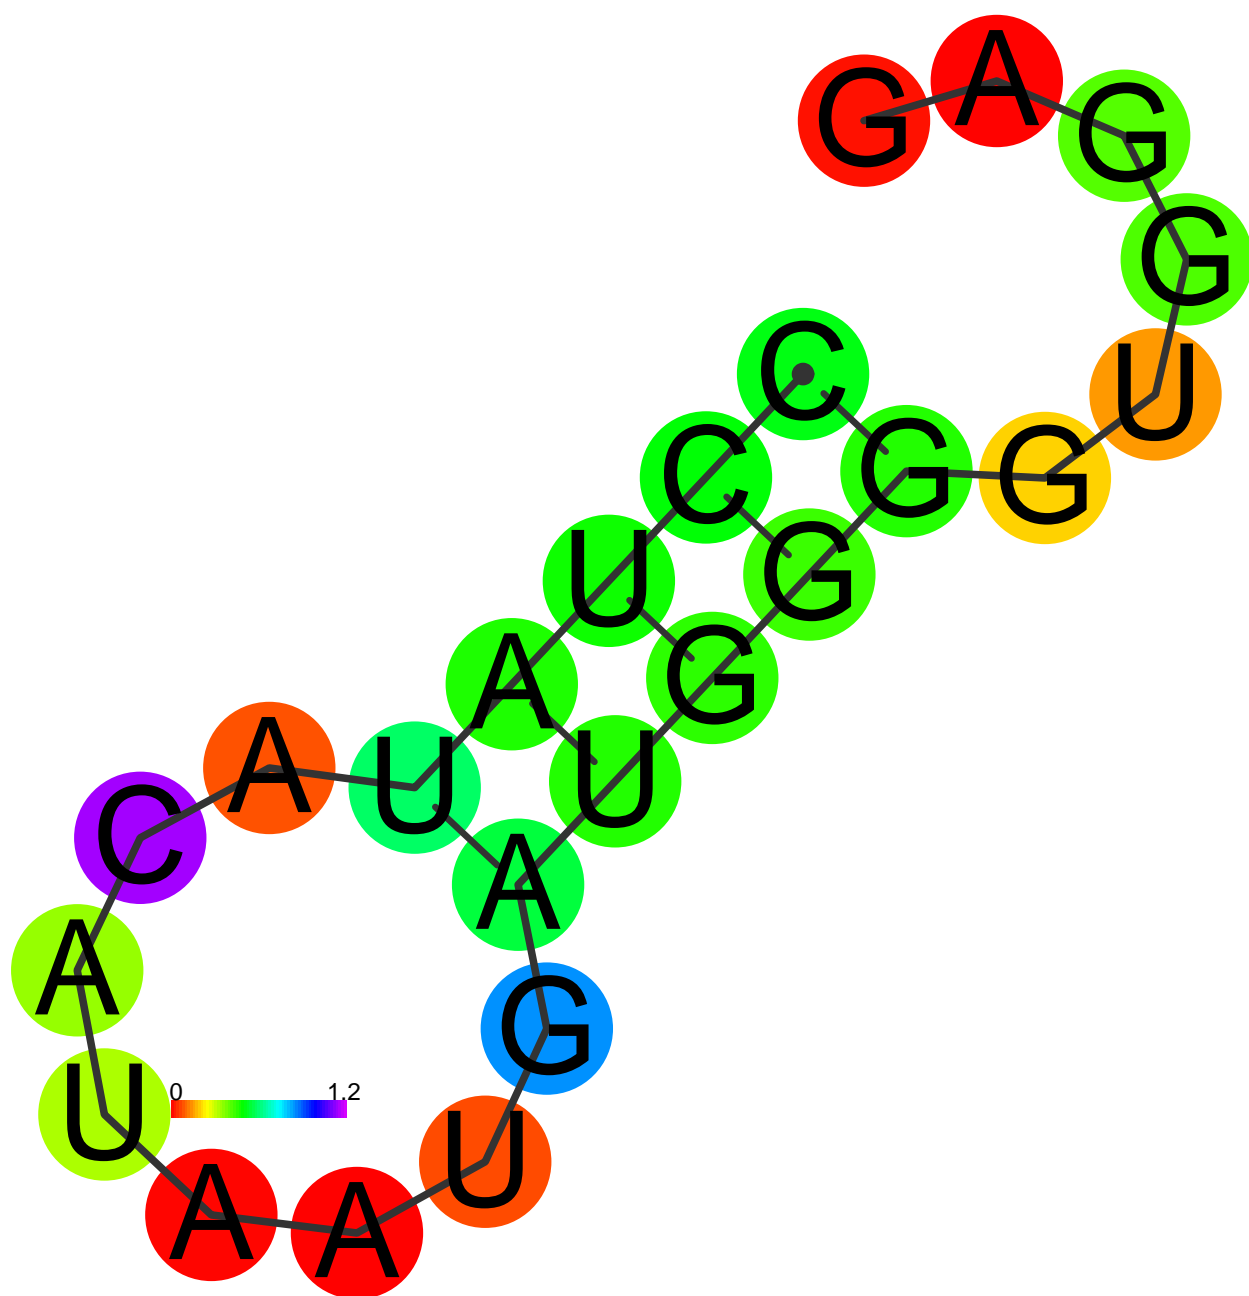

Supplement: Supplementary file 470 [file supplementary]

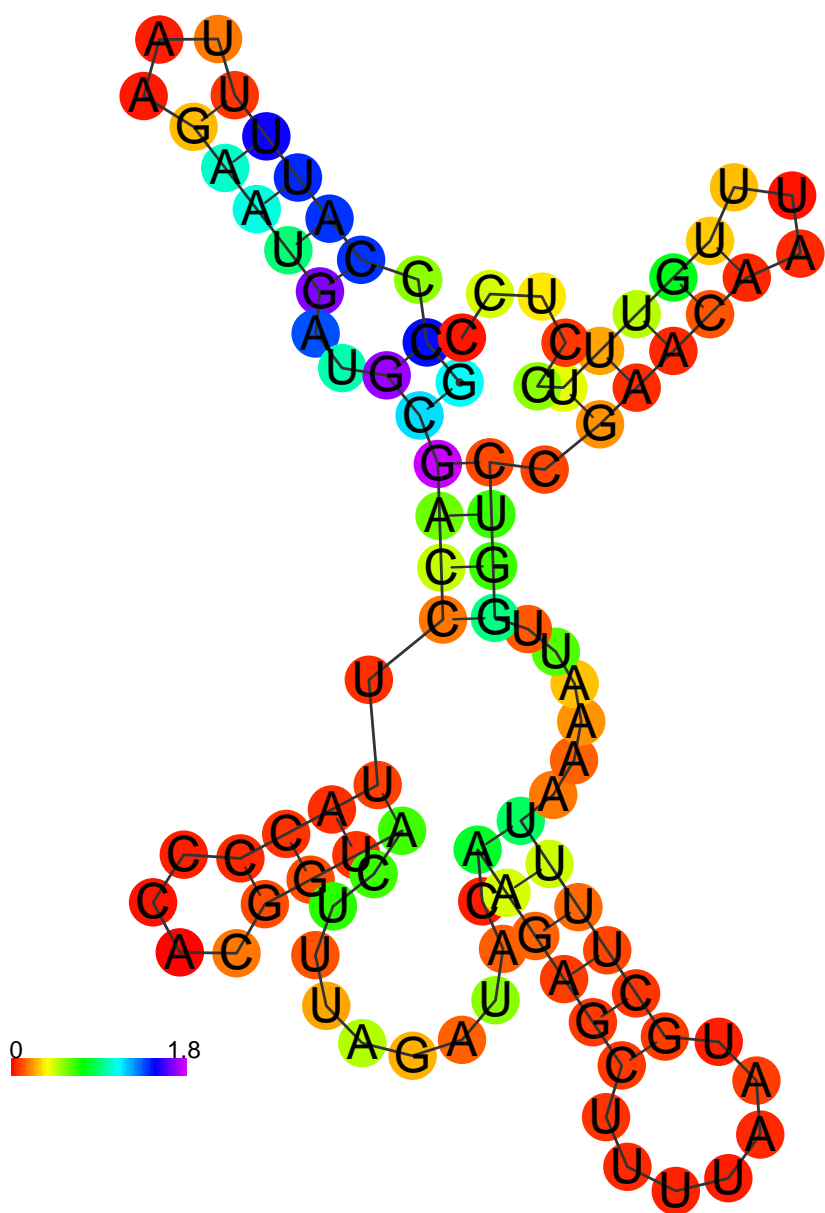

Supplement: Supplementary file 471 [file supplementary]



Supplement: Supplementary file 472 [file supplementary]

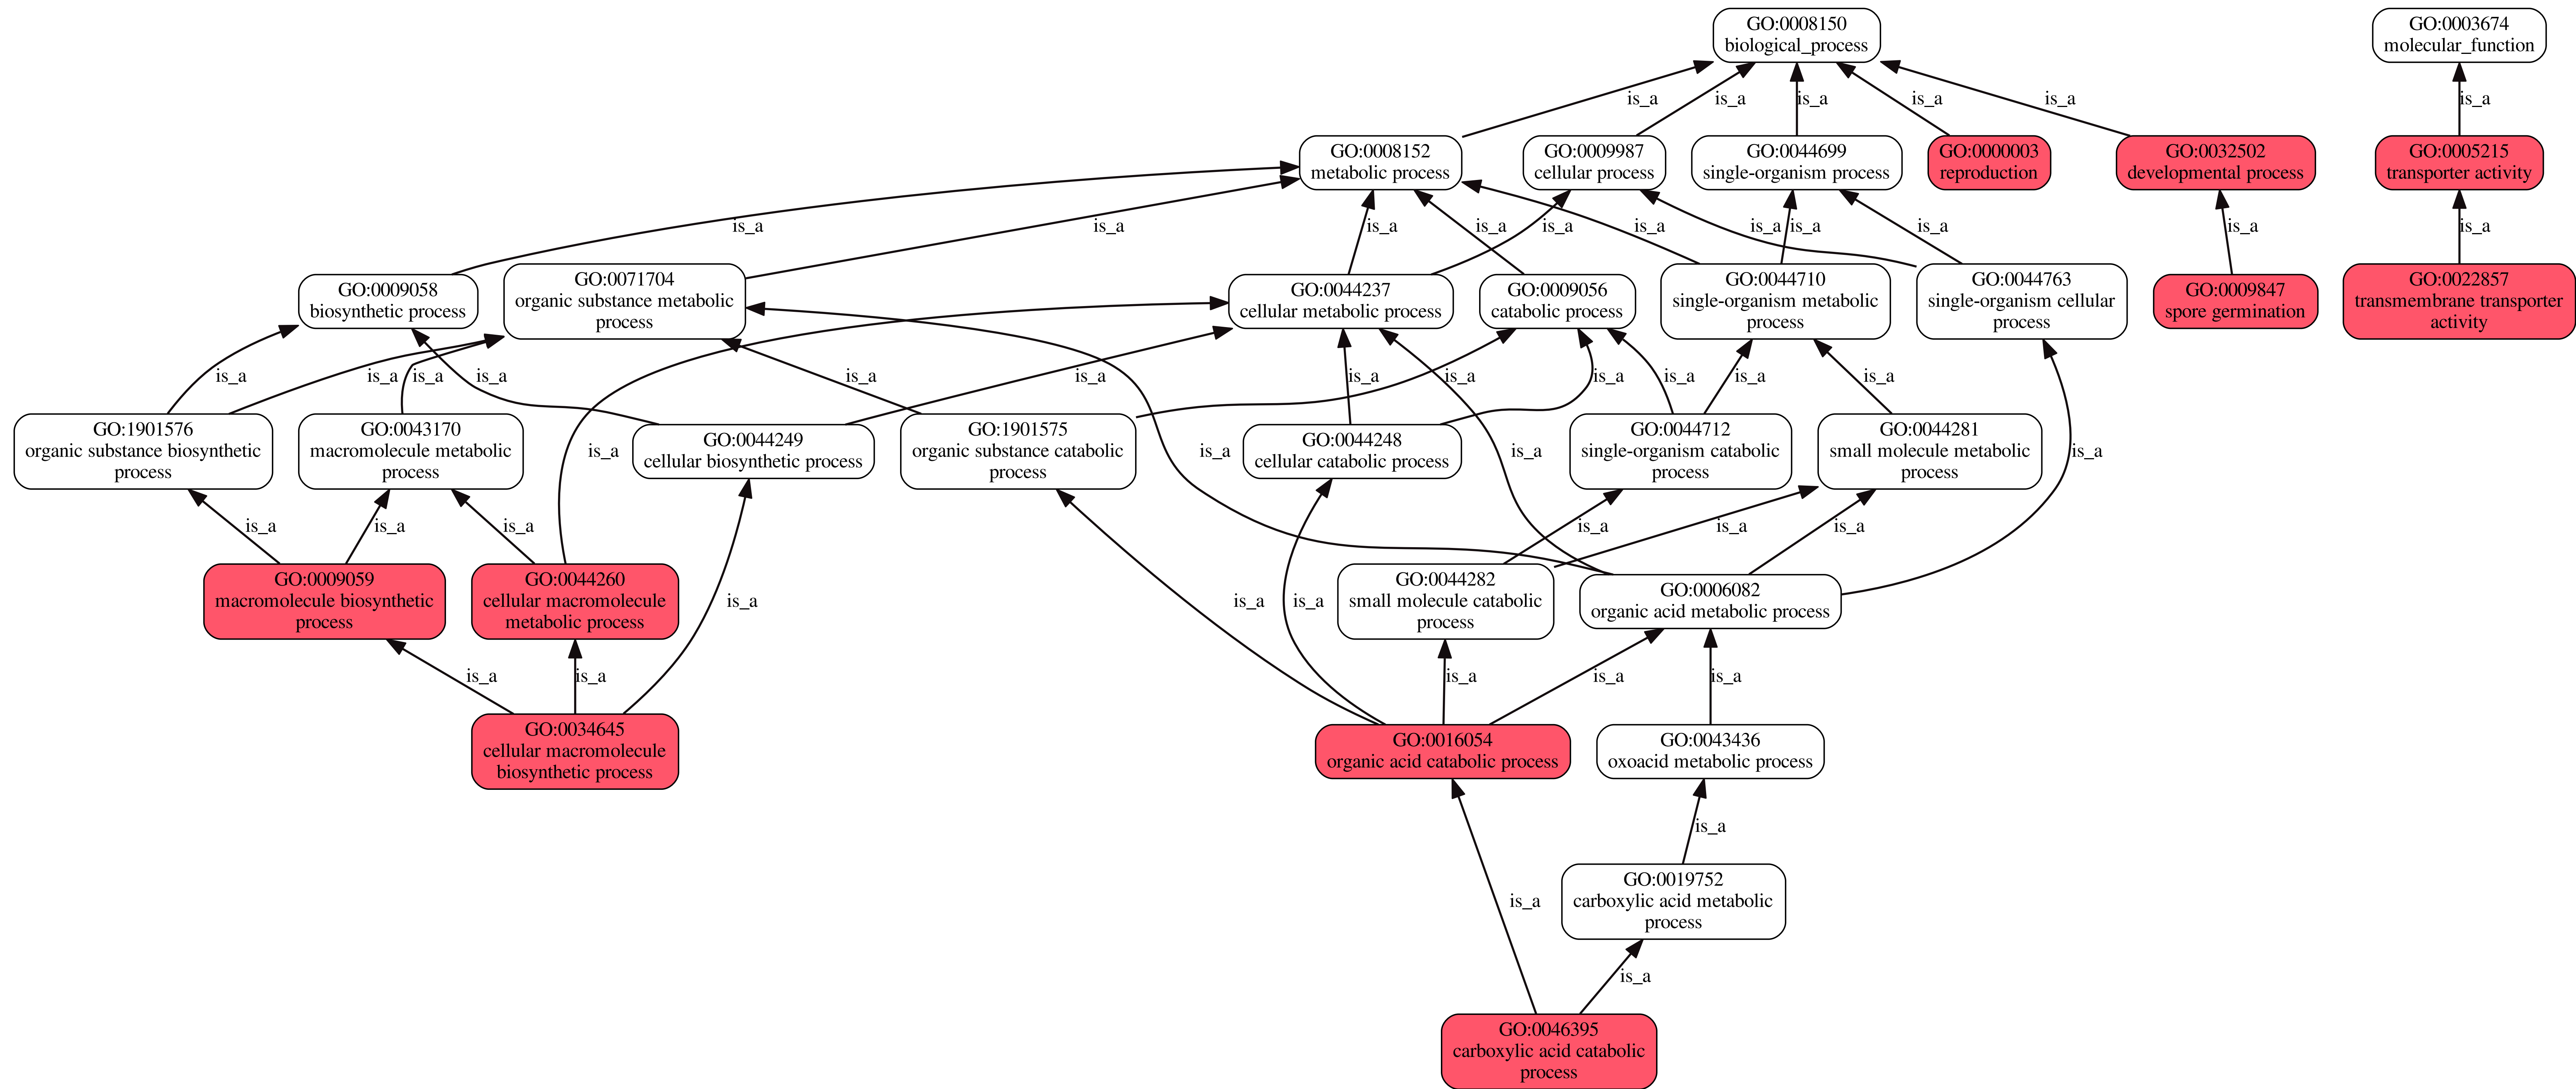

Supplement: Supplementary file 473 [file supplementary]



Supplement: Supplementary file 474 [file supplementary]

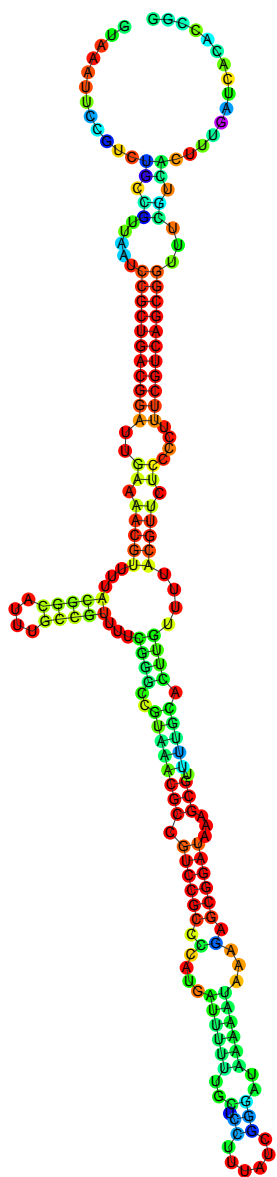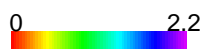

Supplement: Supplementary file 475 [file supplementary]

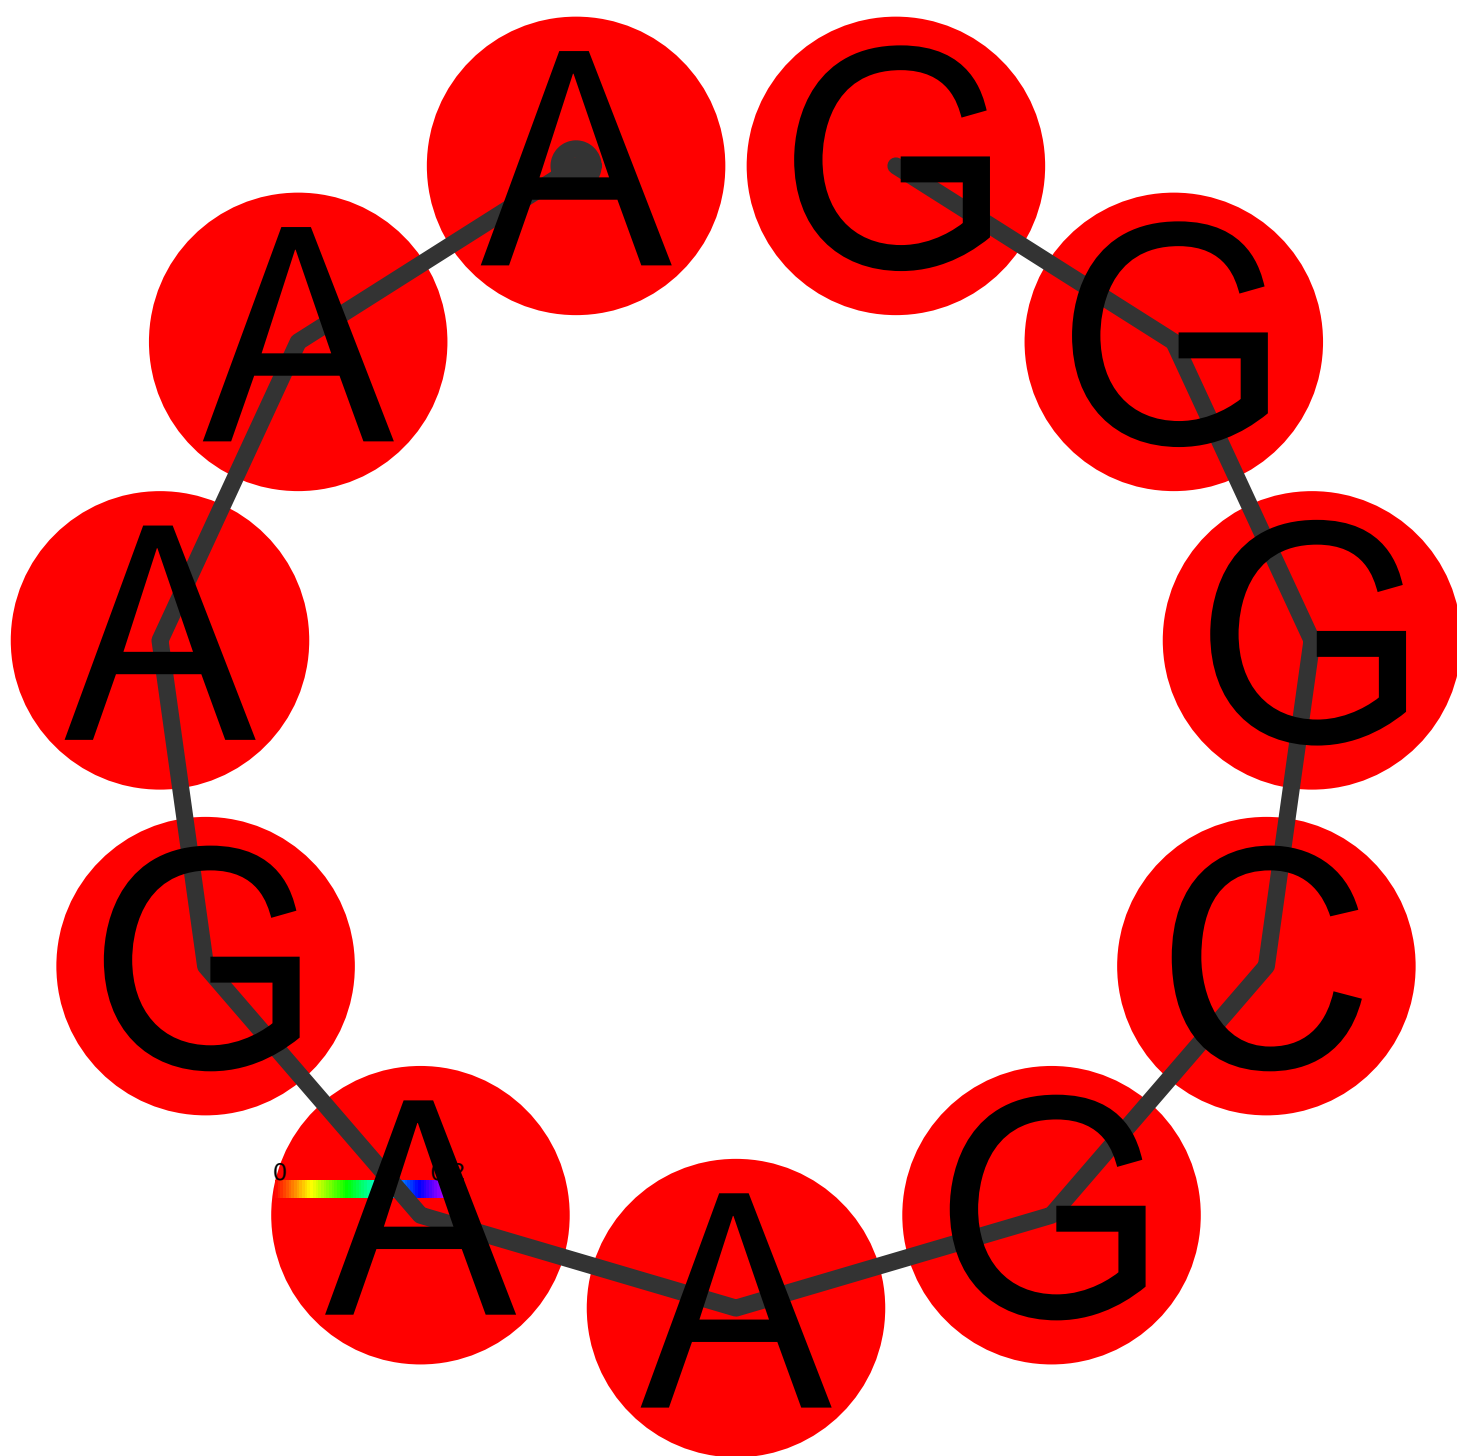

Supplement: Supplementary file 476 [file supplementary]

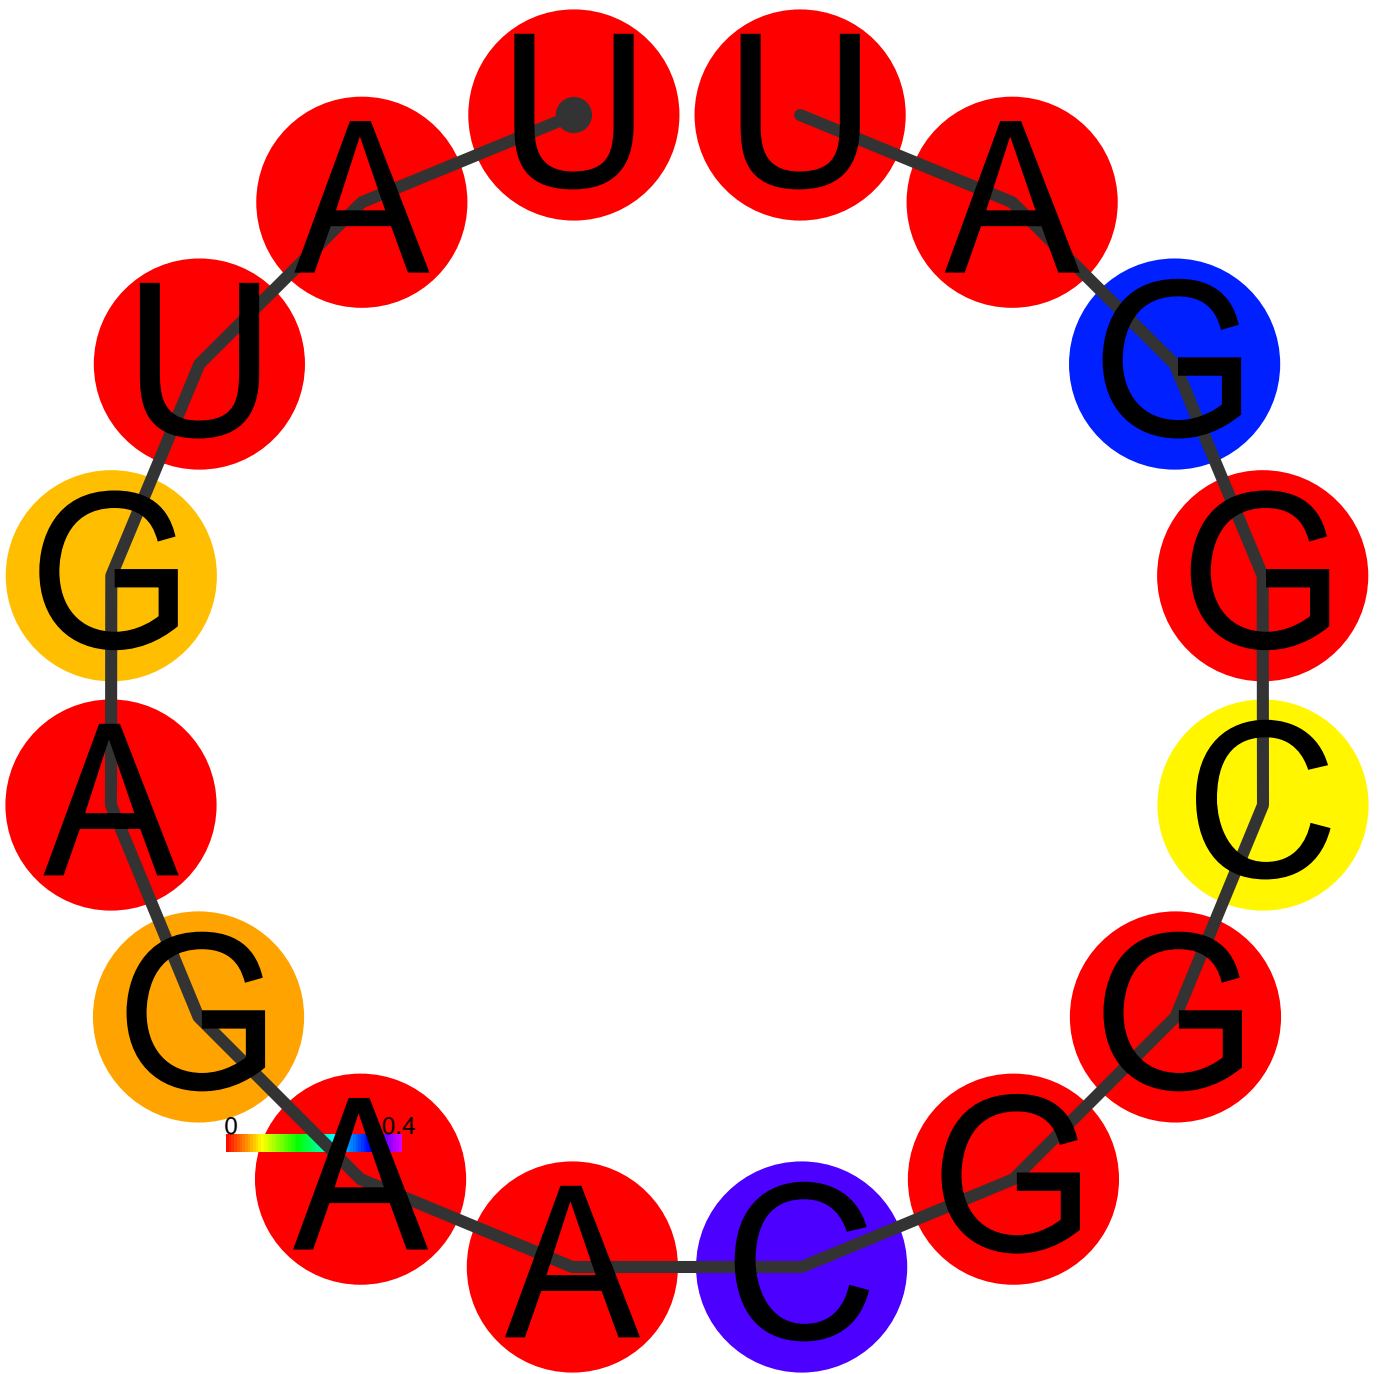

Supplement: Supplementary file 477 [file supplementary]

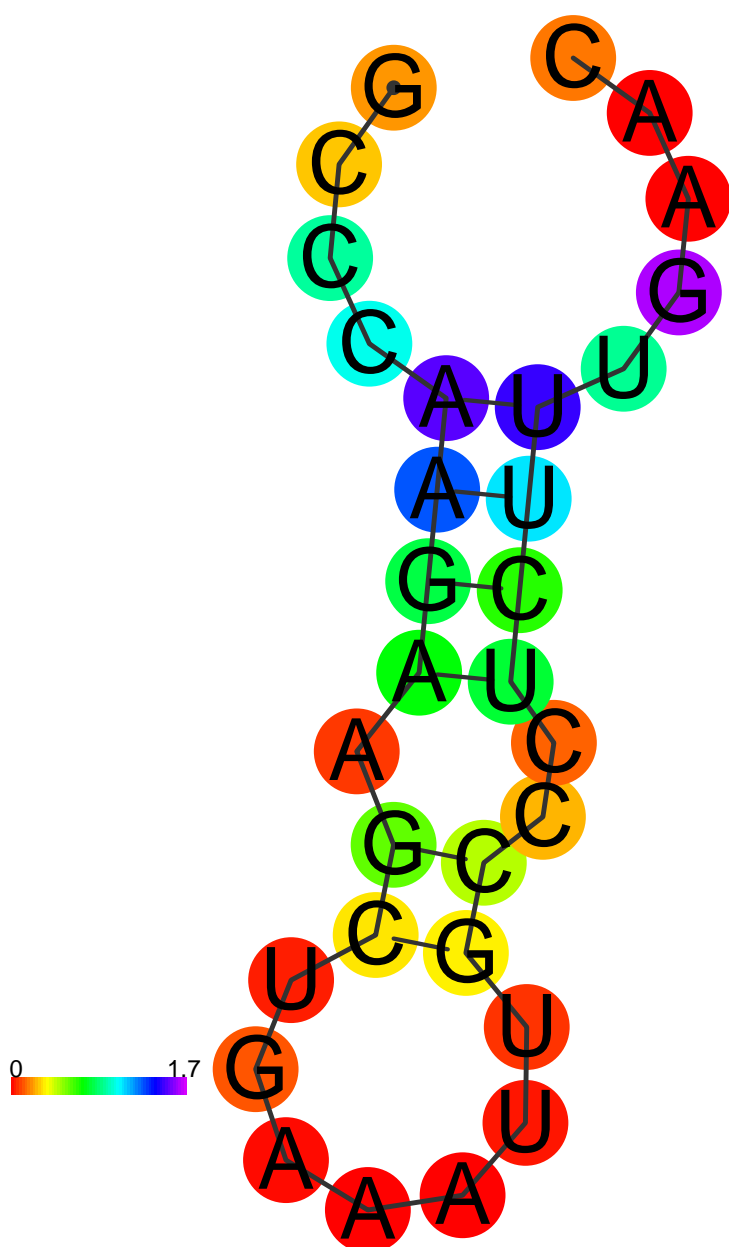

Supplement: Supplementary file 478 [file supplementary]

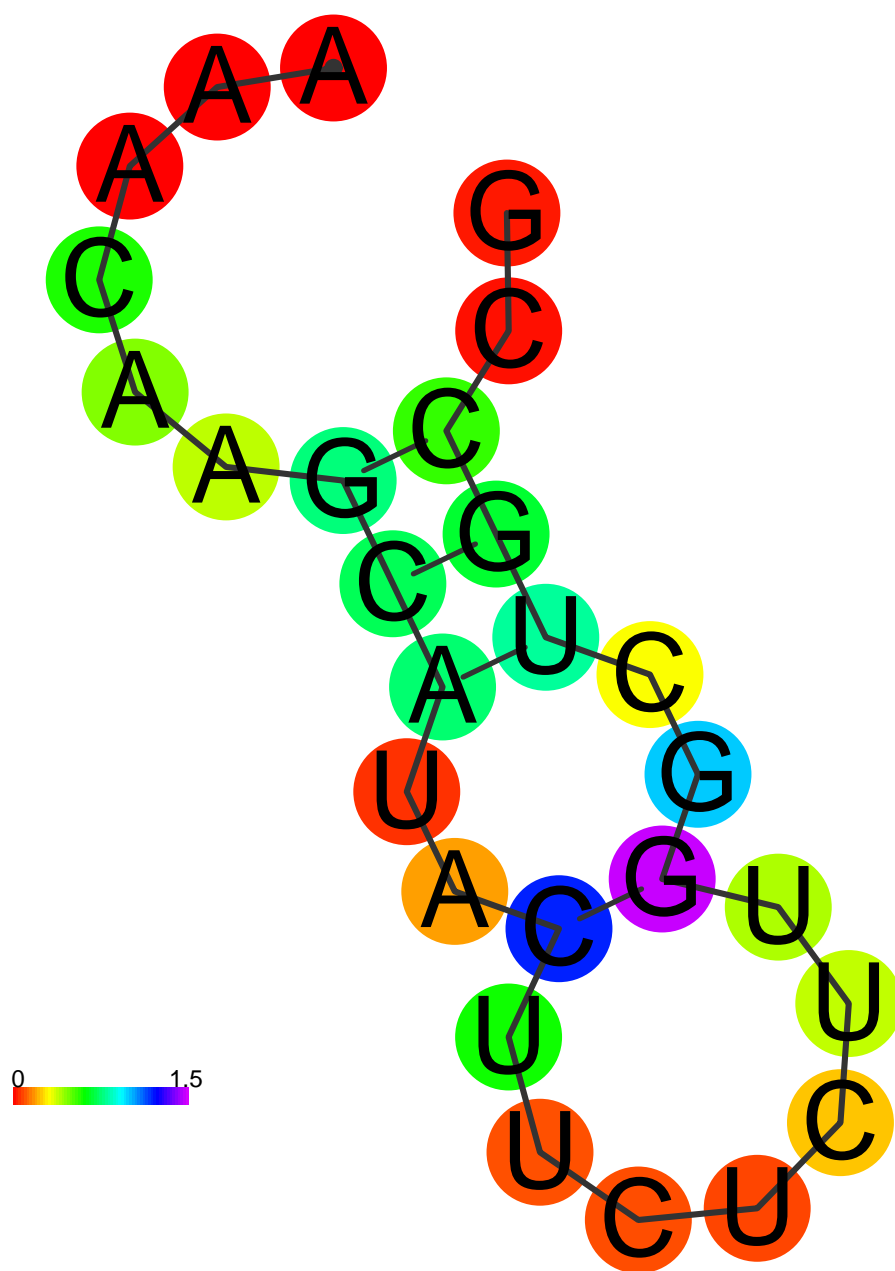

Supplement: Supplementary file 479 [file supplementary]

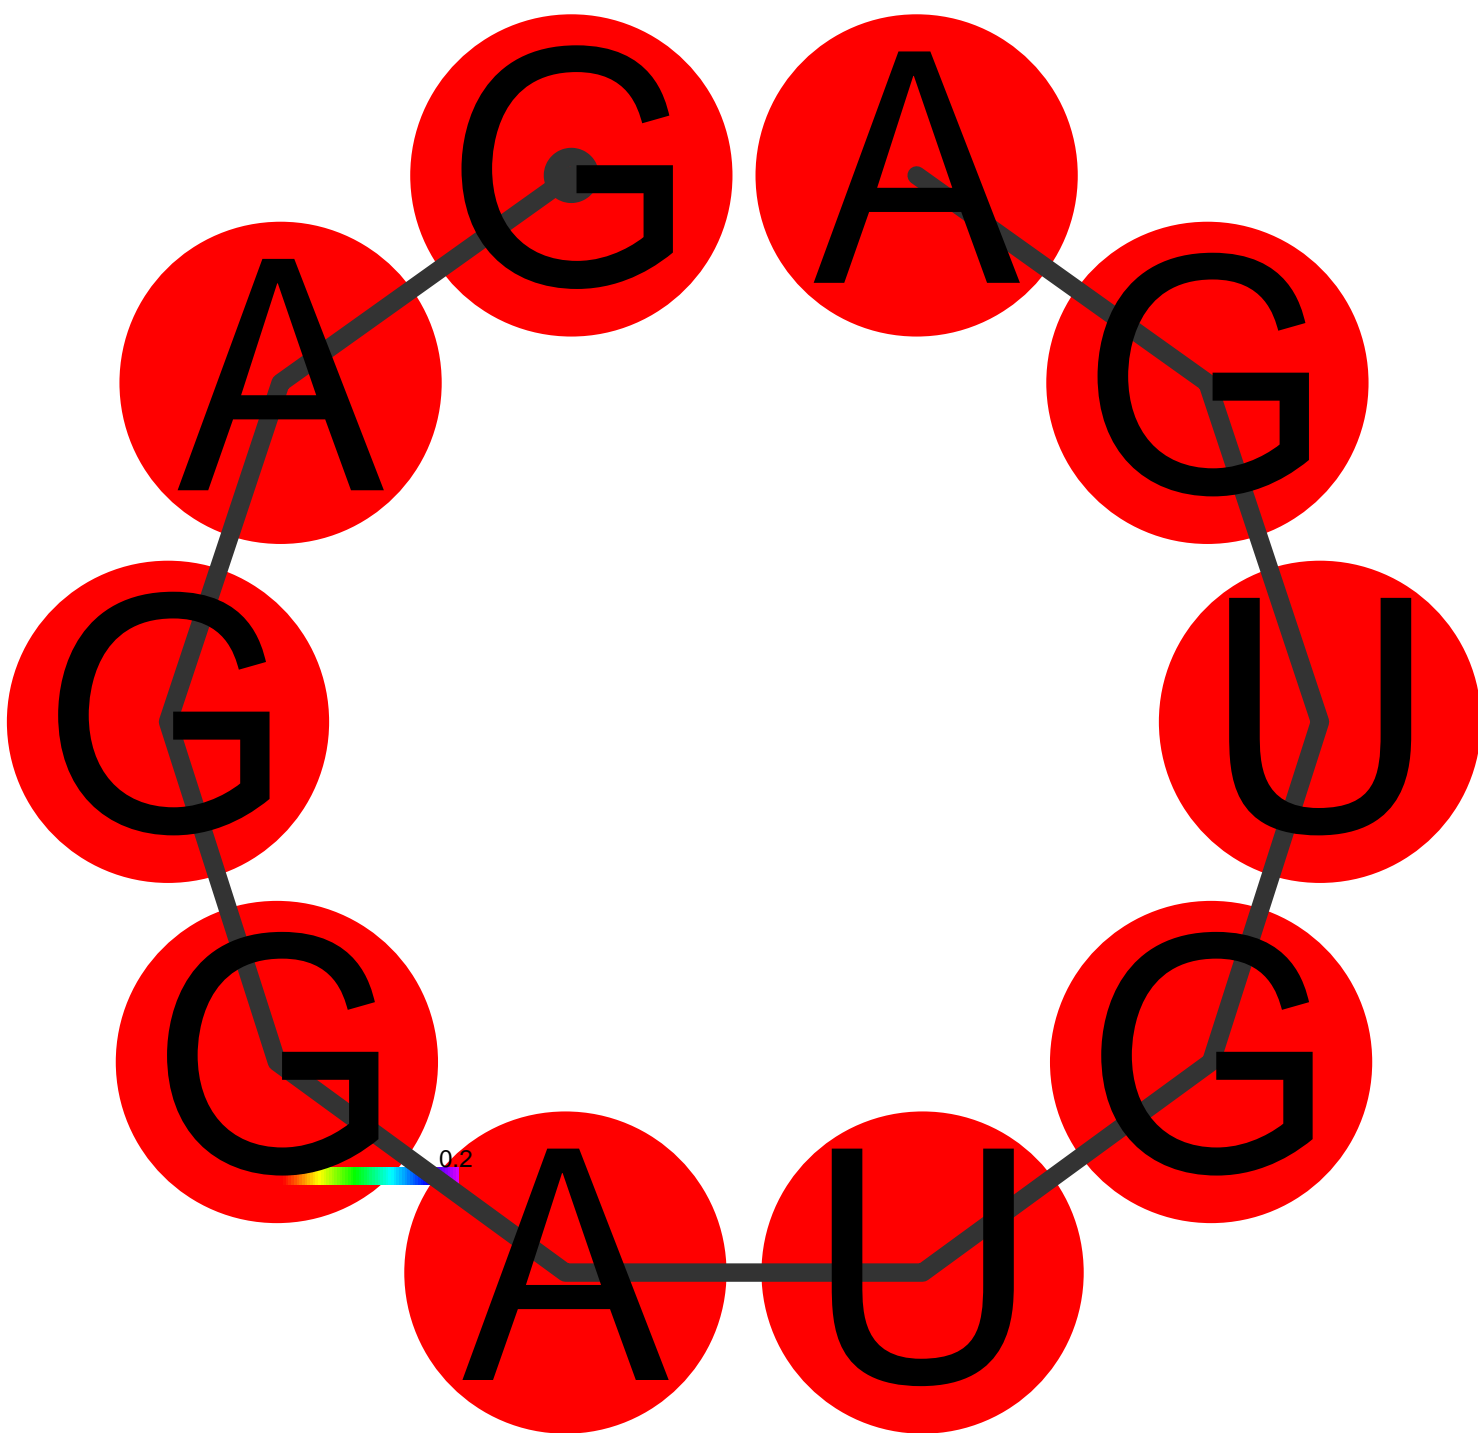

Supplement: Supplementary file 480 [file supplementary]

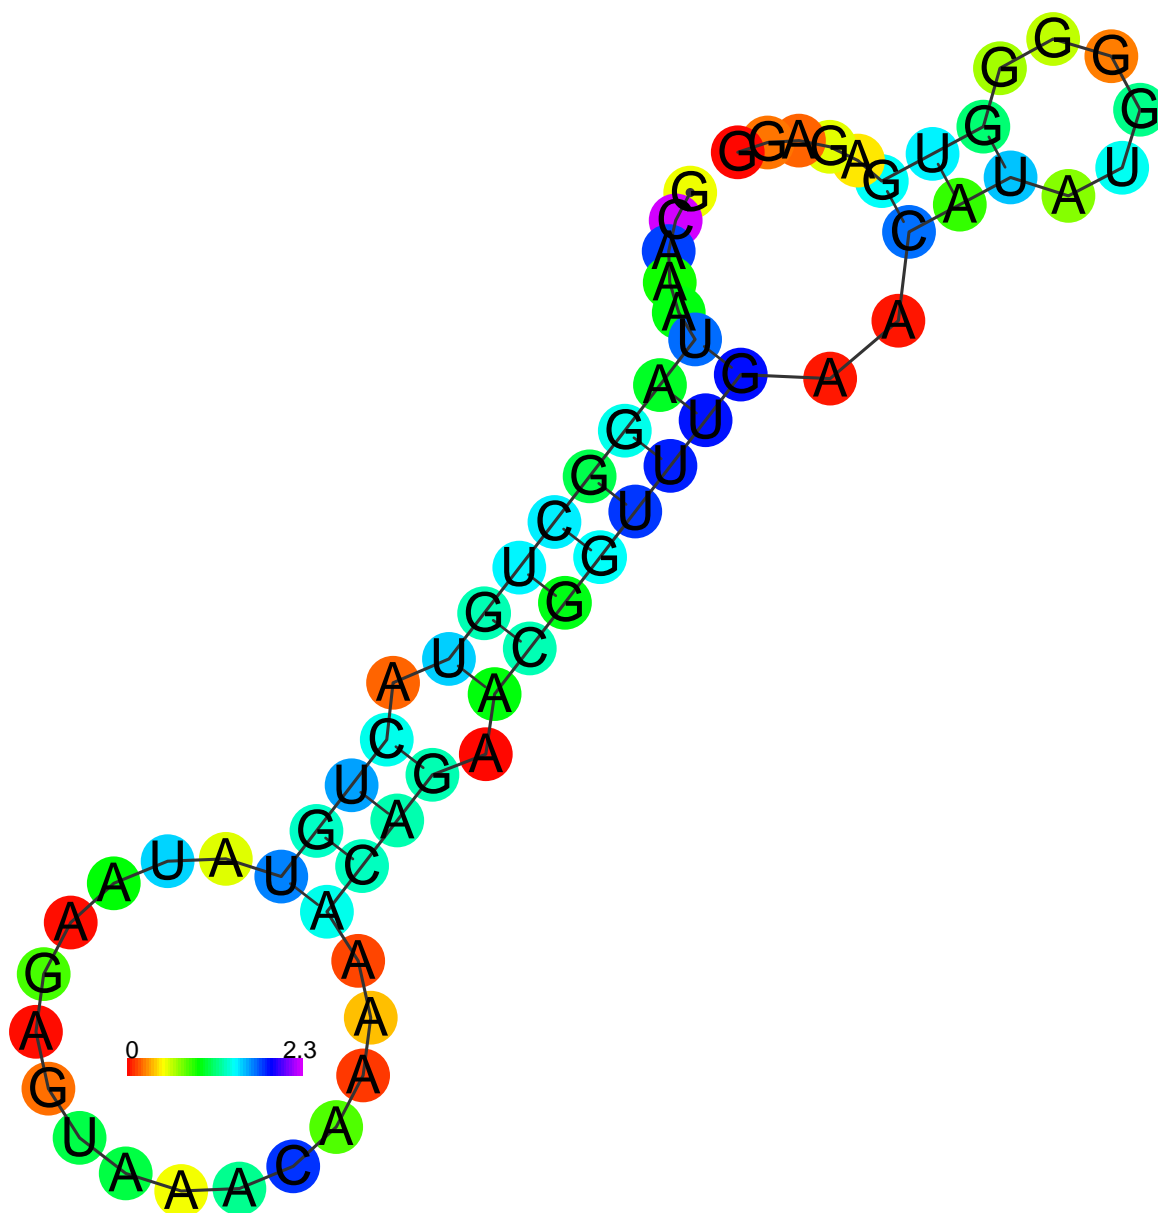

Supplement: Supplementary file 481 [file supplementary]

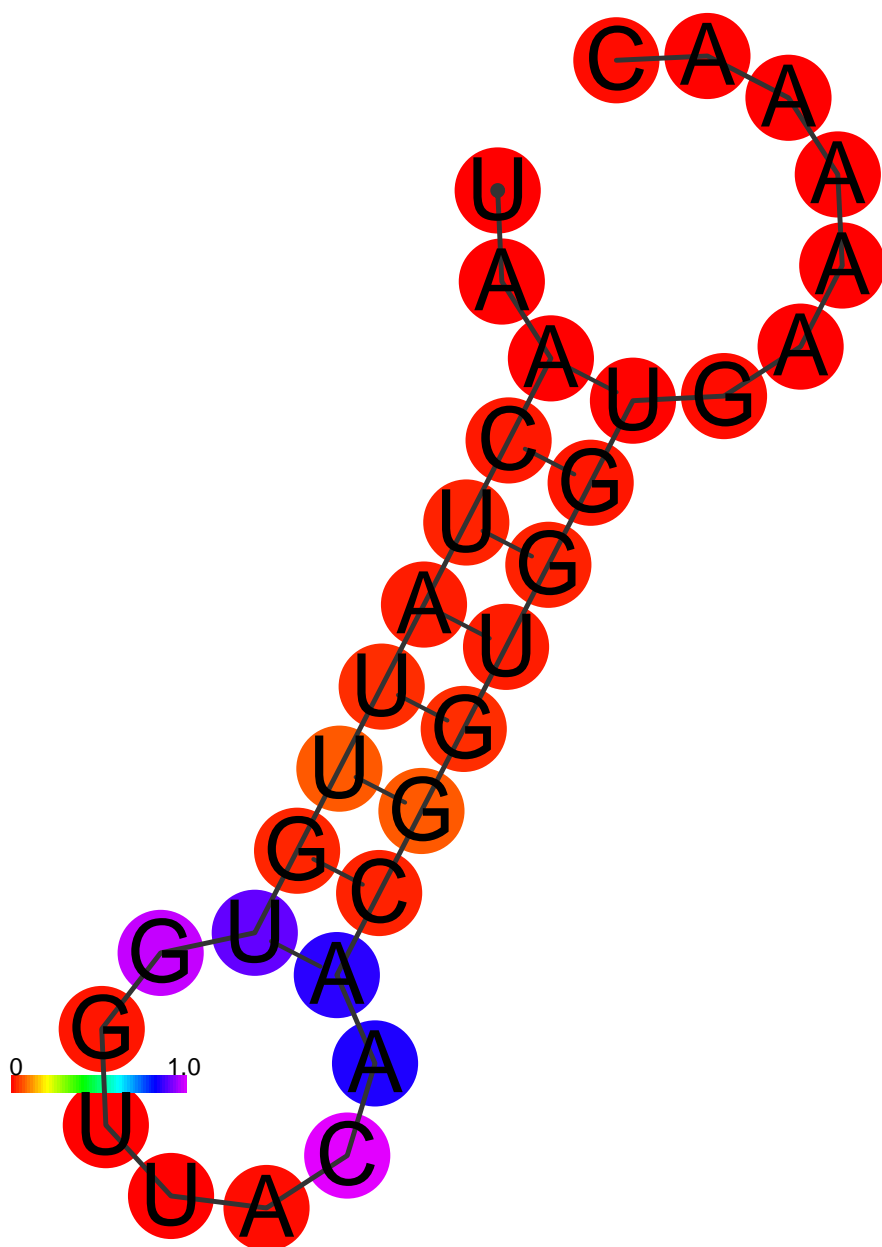

Supplement: Supplementary file 482 [file supplementary]

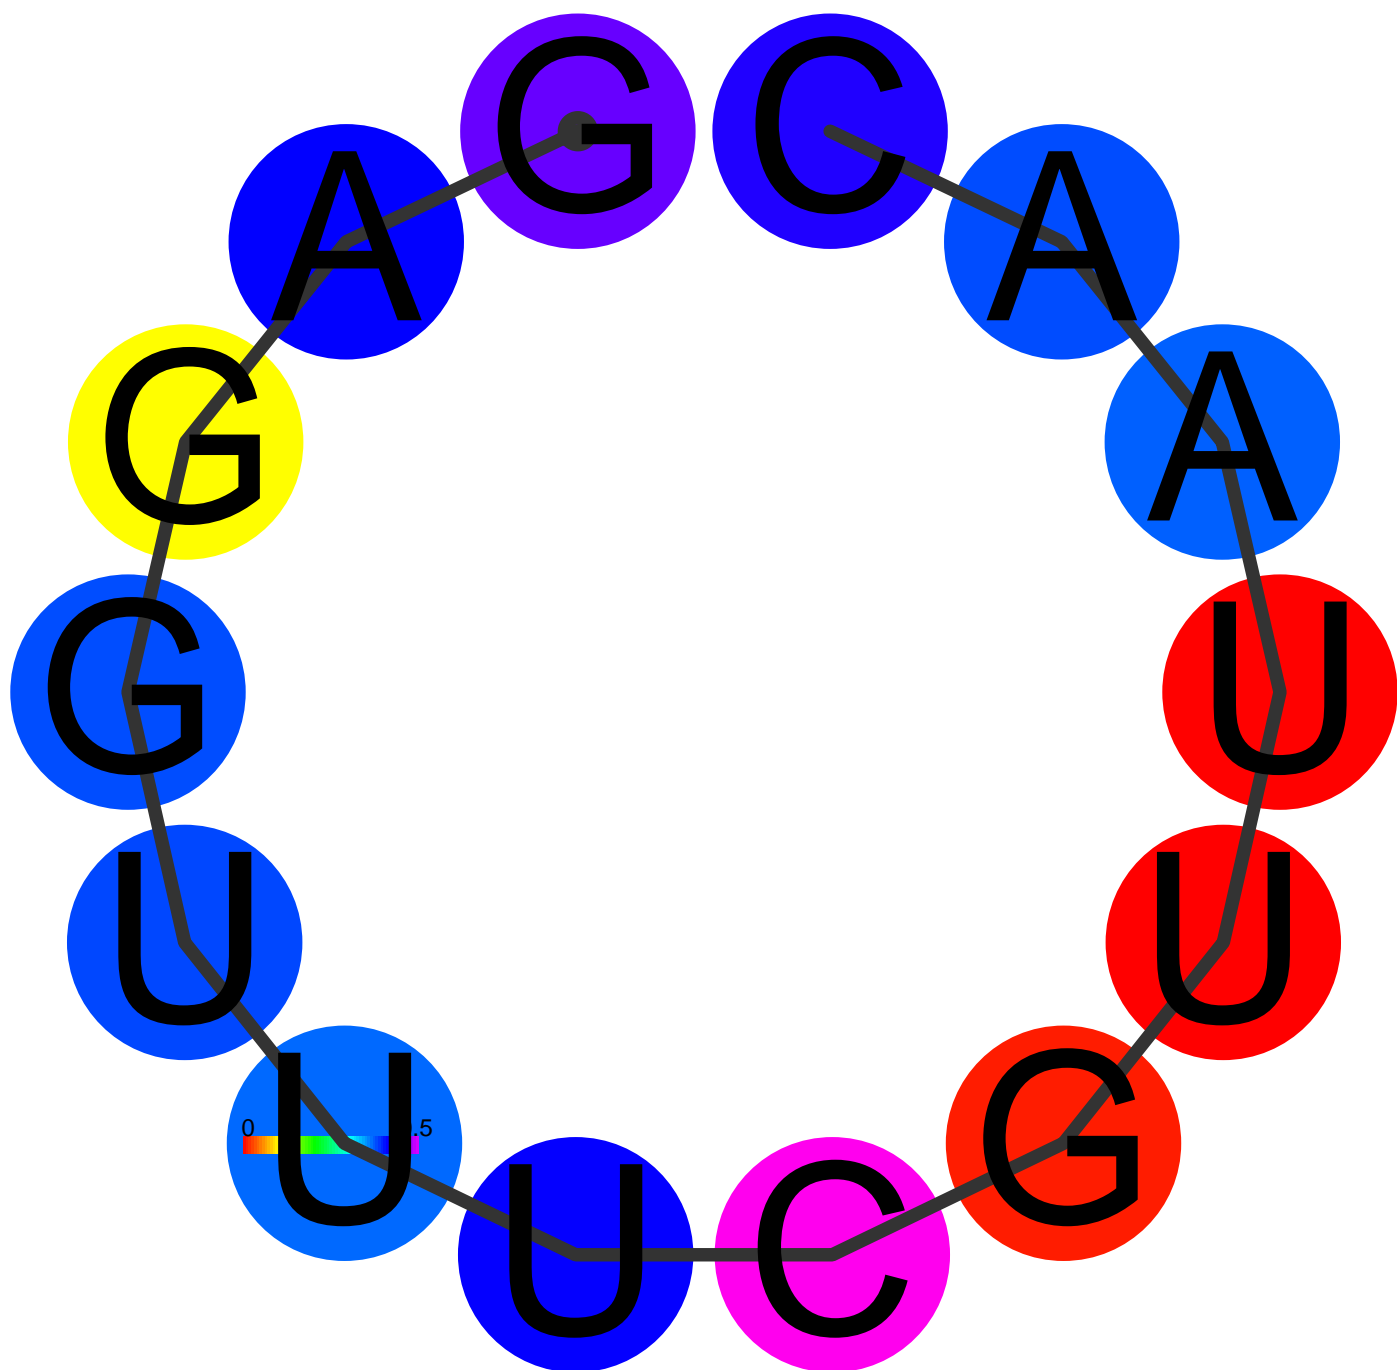

Supplement: Supplementary file 483 [file supplementary]

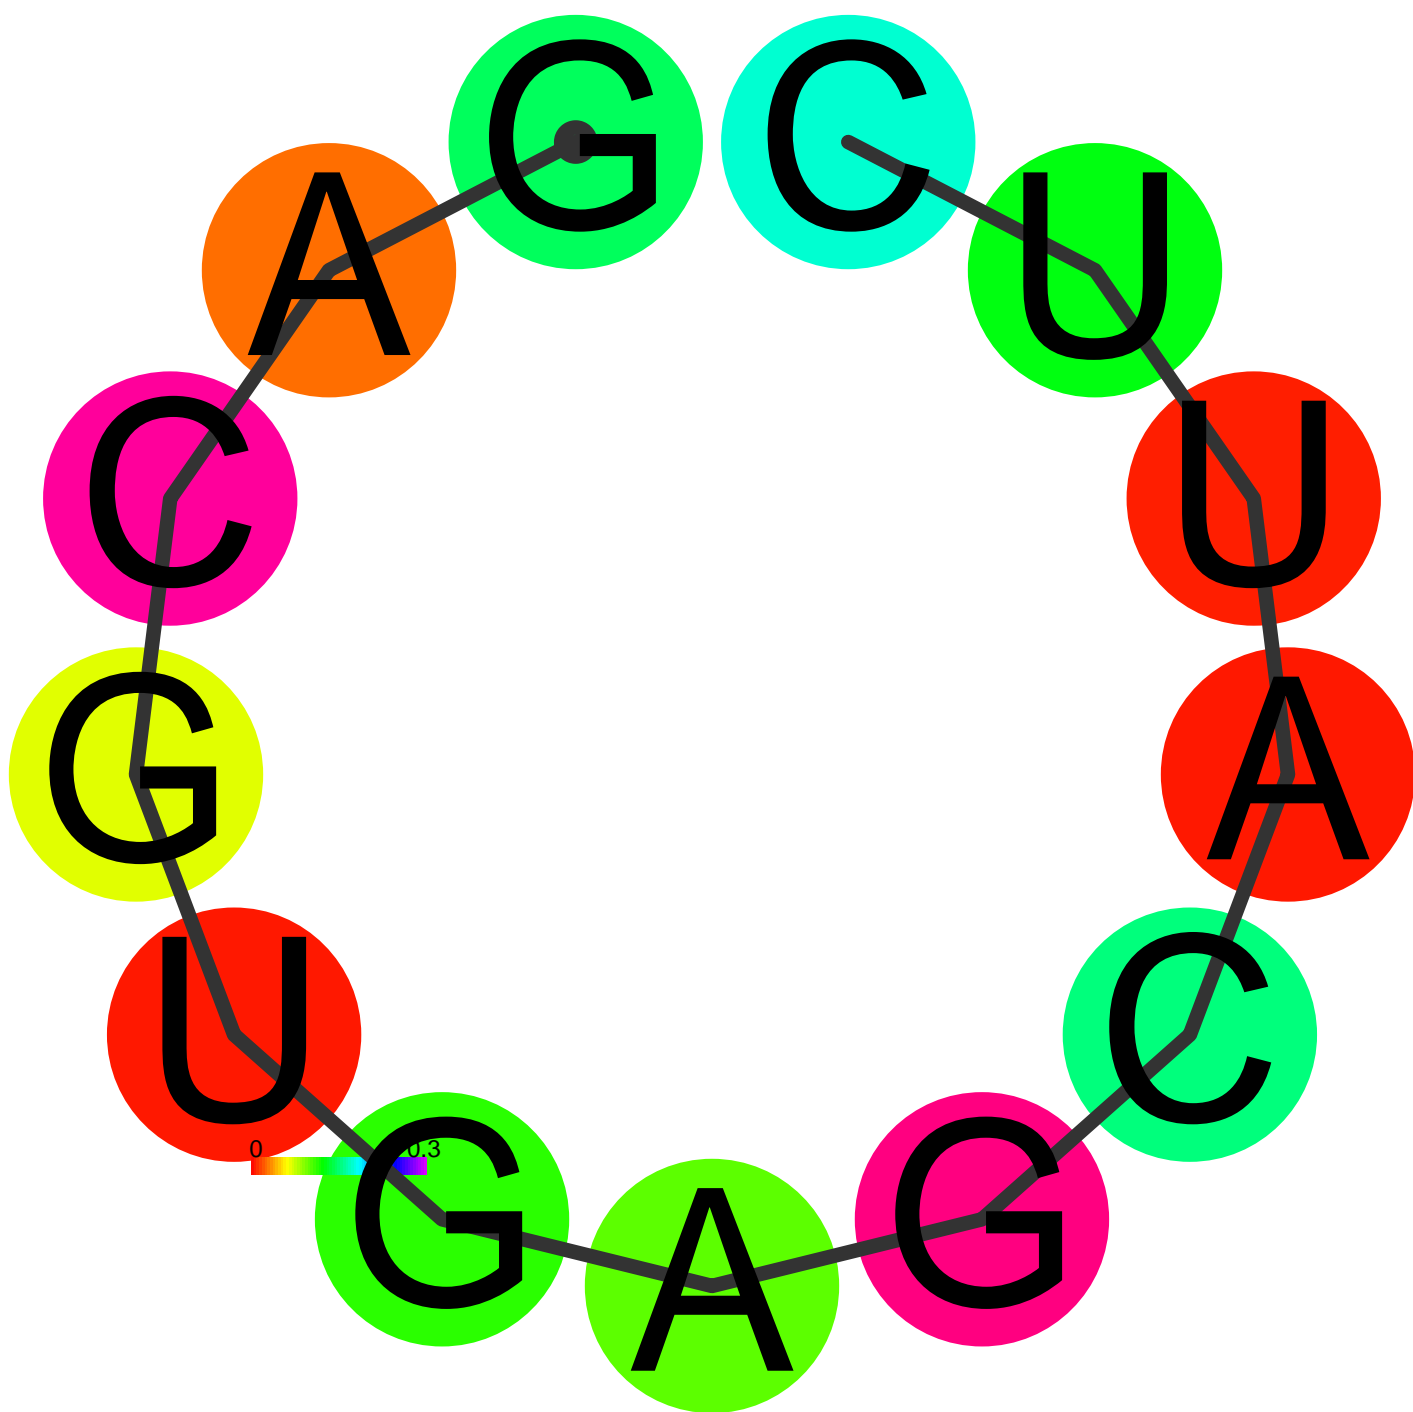

Supplement: Supplementary file 484 [file supplementary]

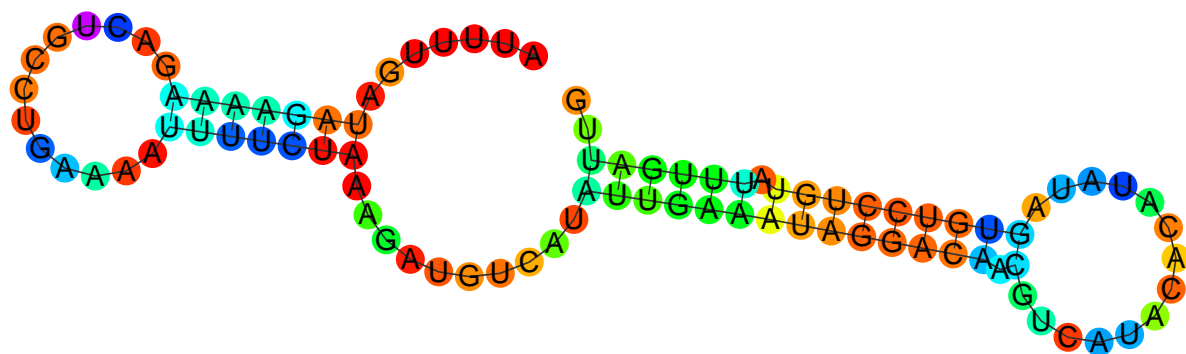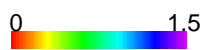

Supplement: Supplementary file 485 [file supplementary]

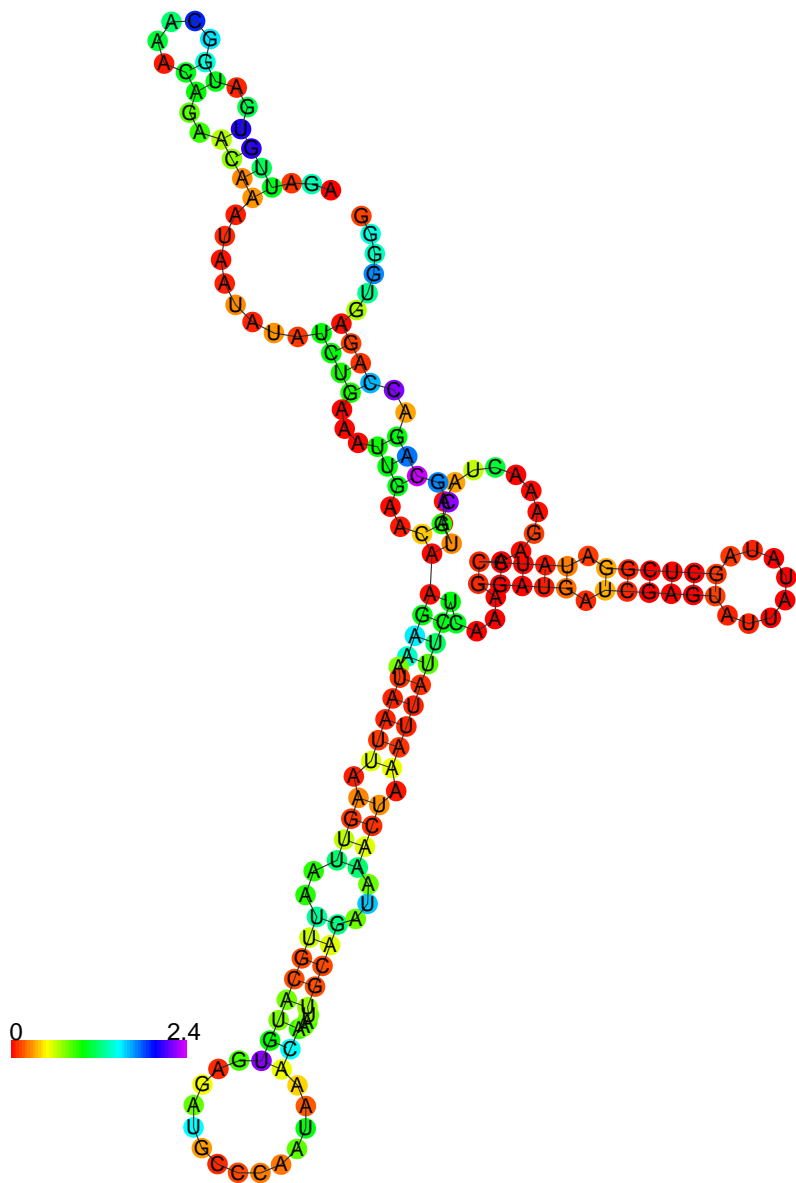

Supplement: Supplementary file 486 [file supplementary]

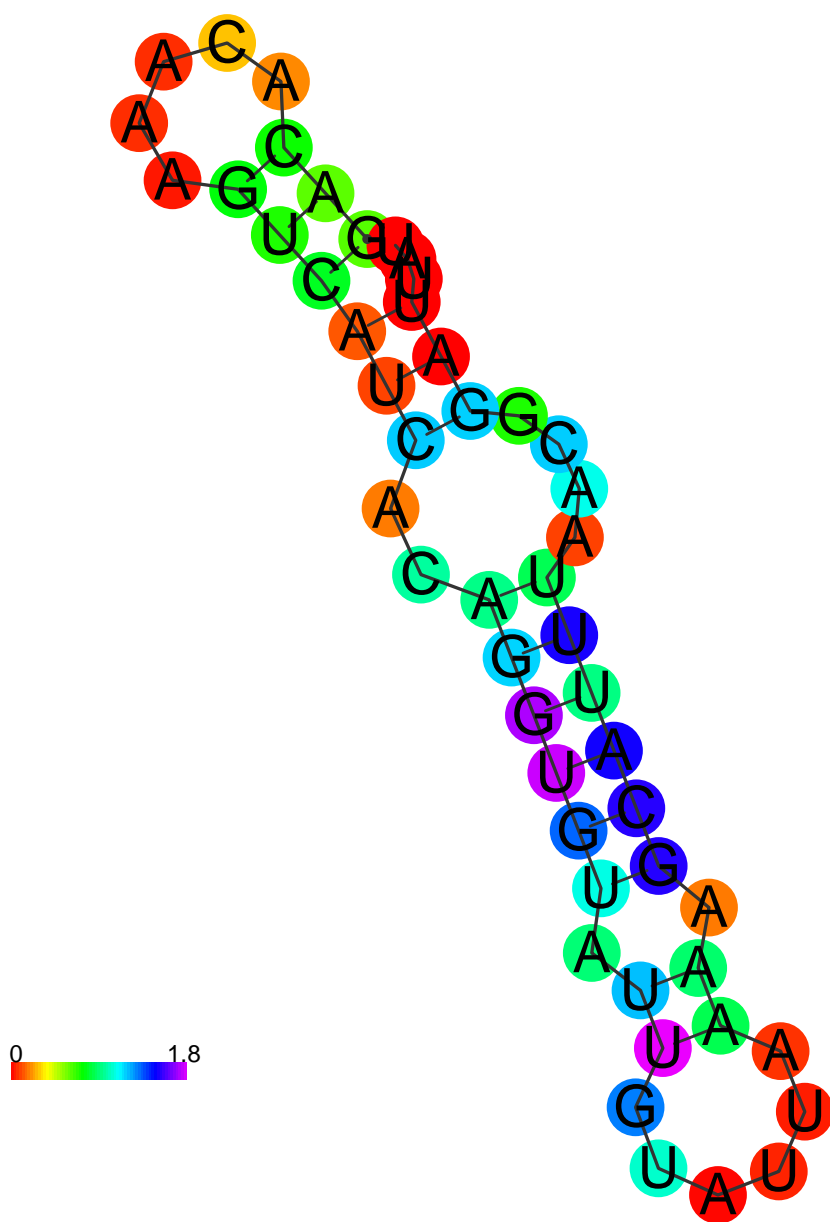

Supplement: Supplementary file 487 [file supplementary]

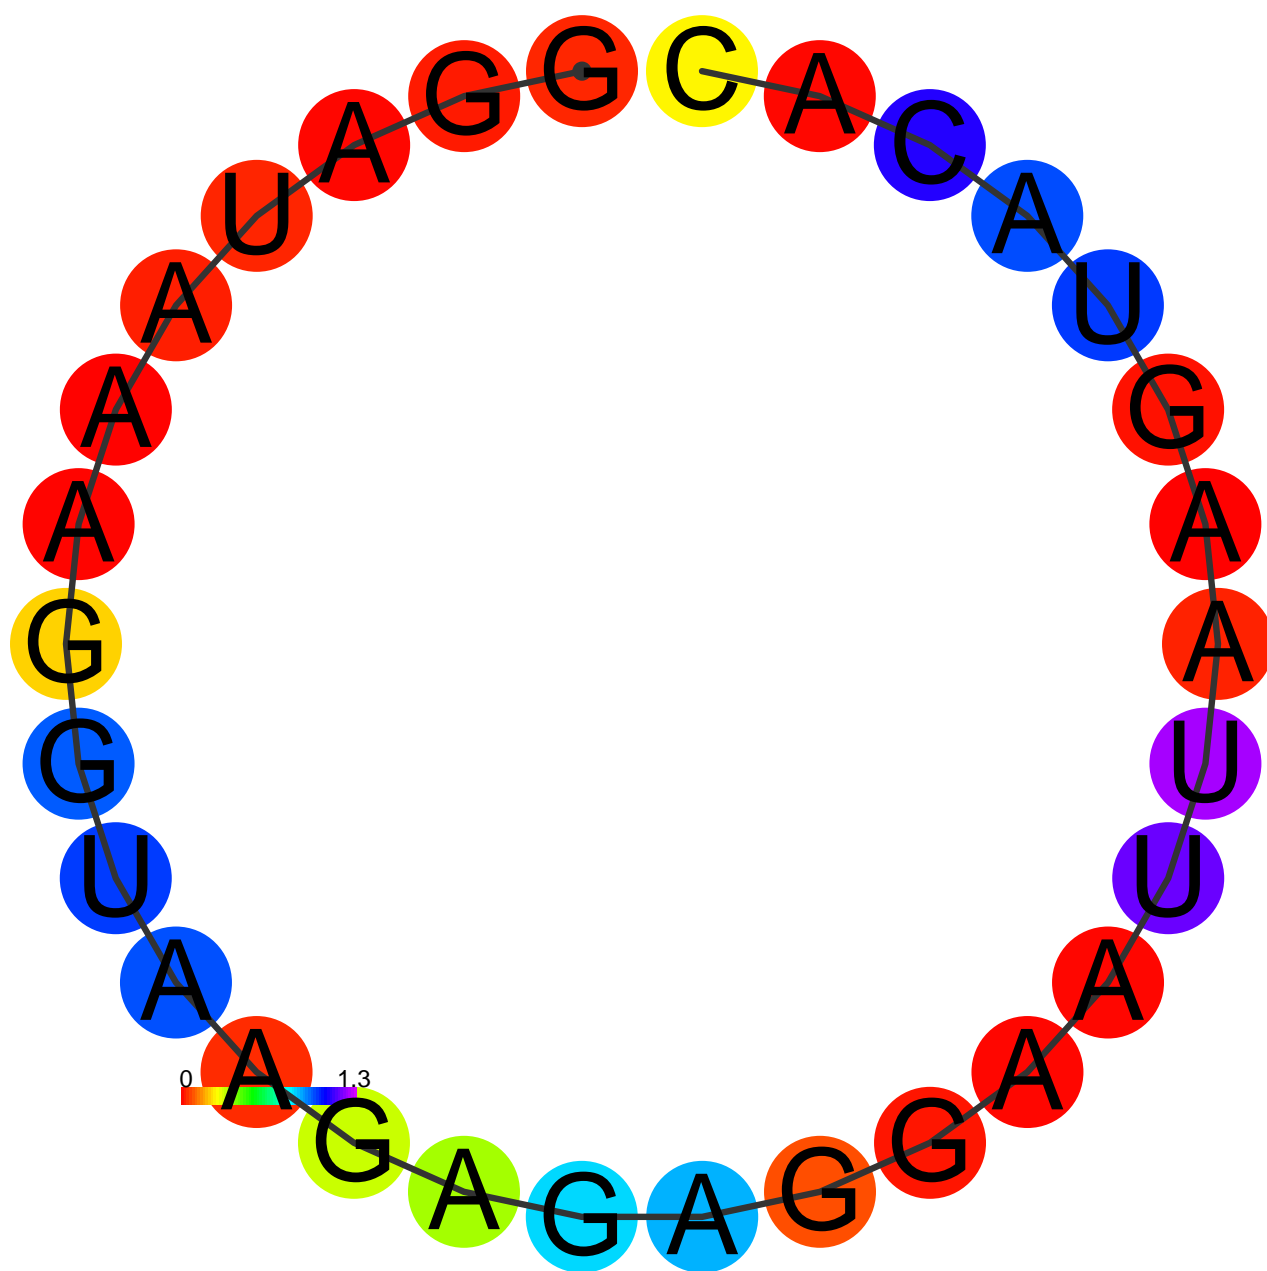

Supplement: Supplementary file 488 [file supplementary]

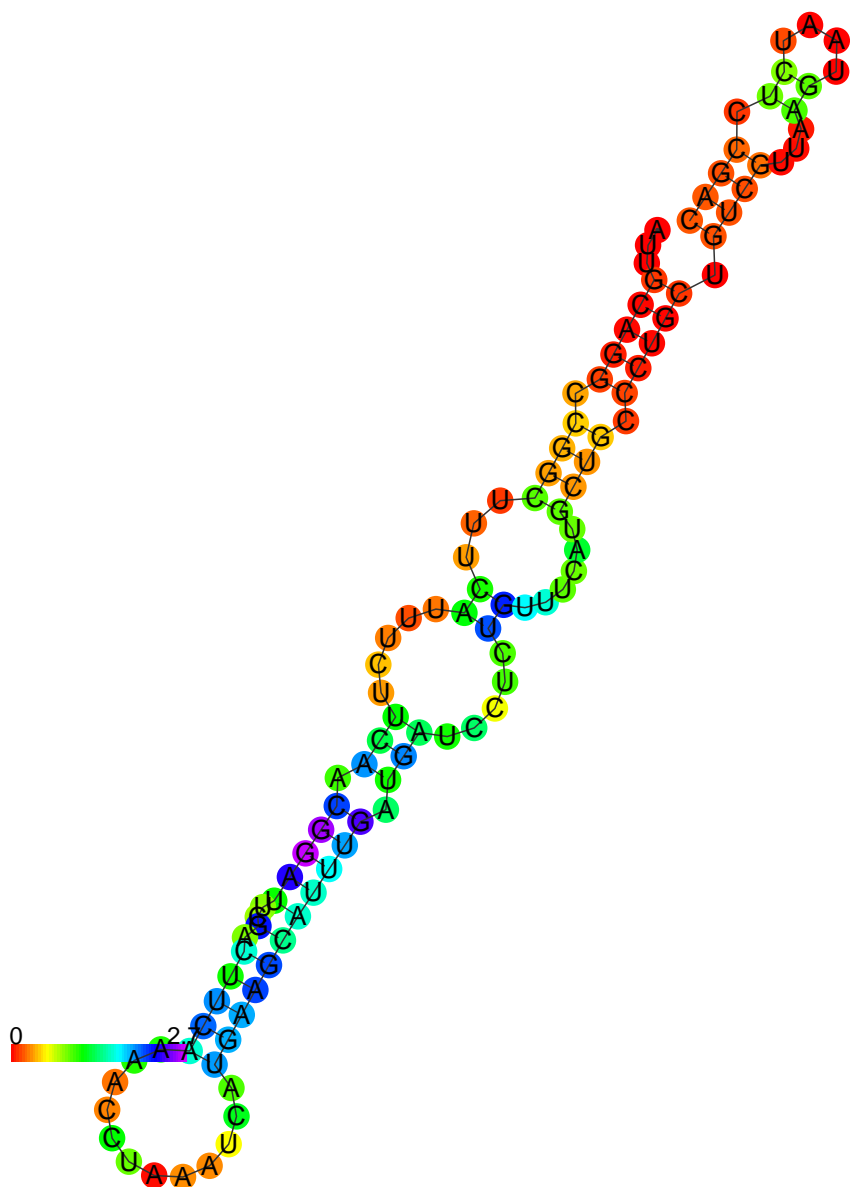

Supplement: Supplementary file 489 [file supplementary]

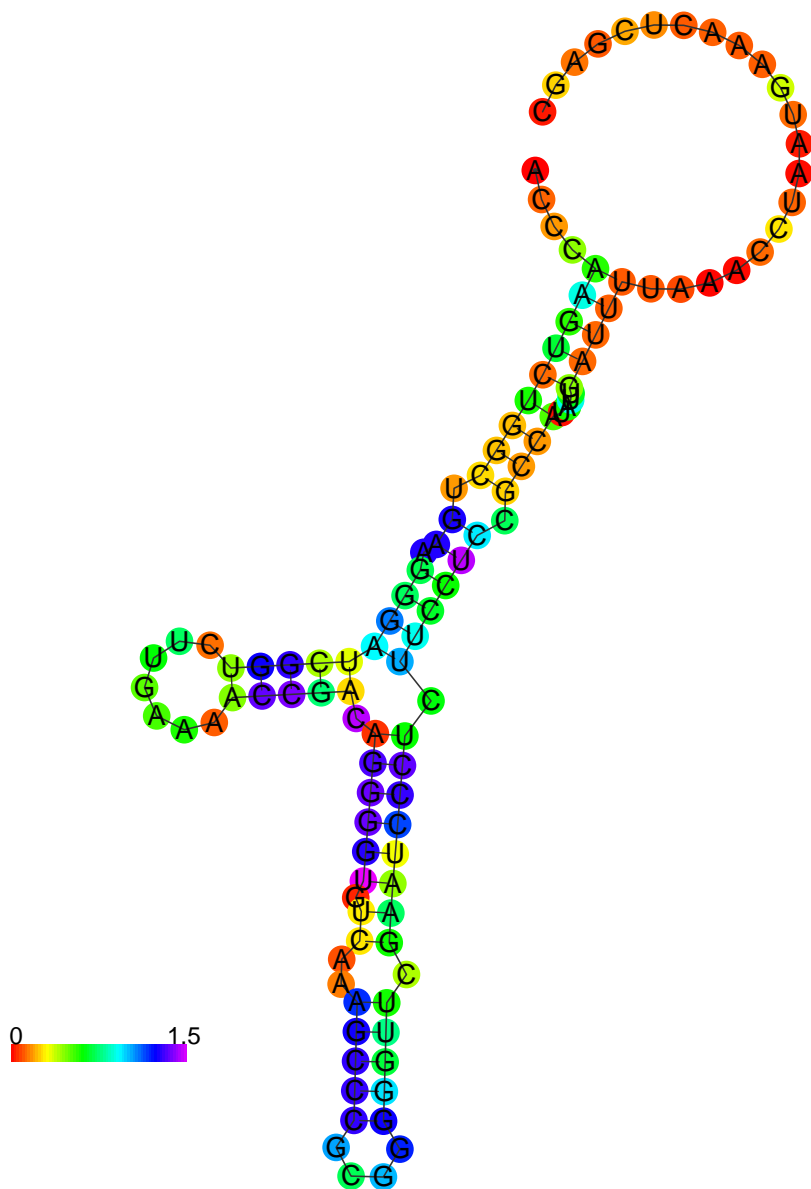

Supplement: Supplementary file 490 [file supplementary]

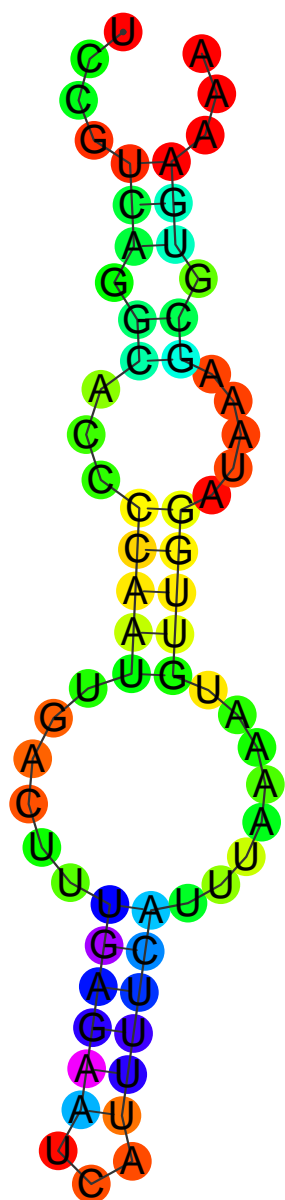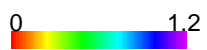

Supplement: Supplementary file 491 [file supplementary]



Supplement: Supplementary file 492 [file supplementary]

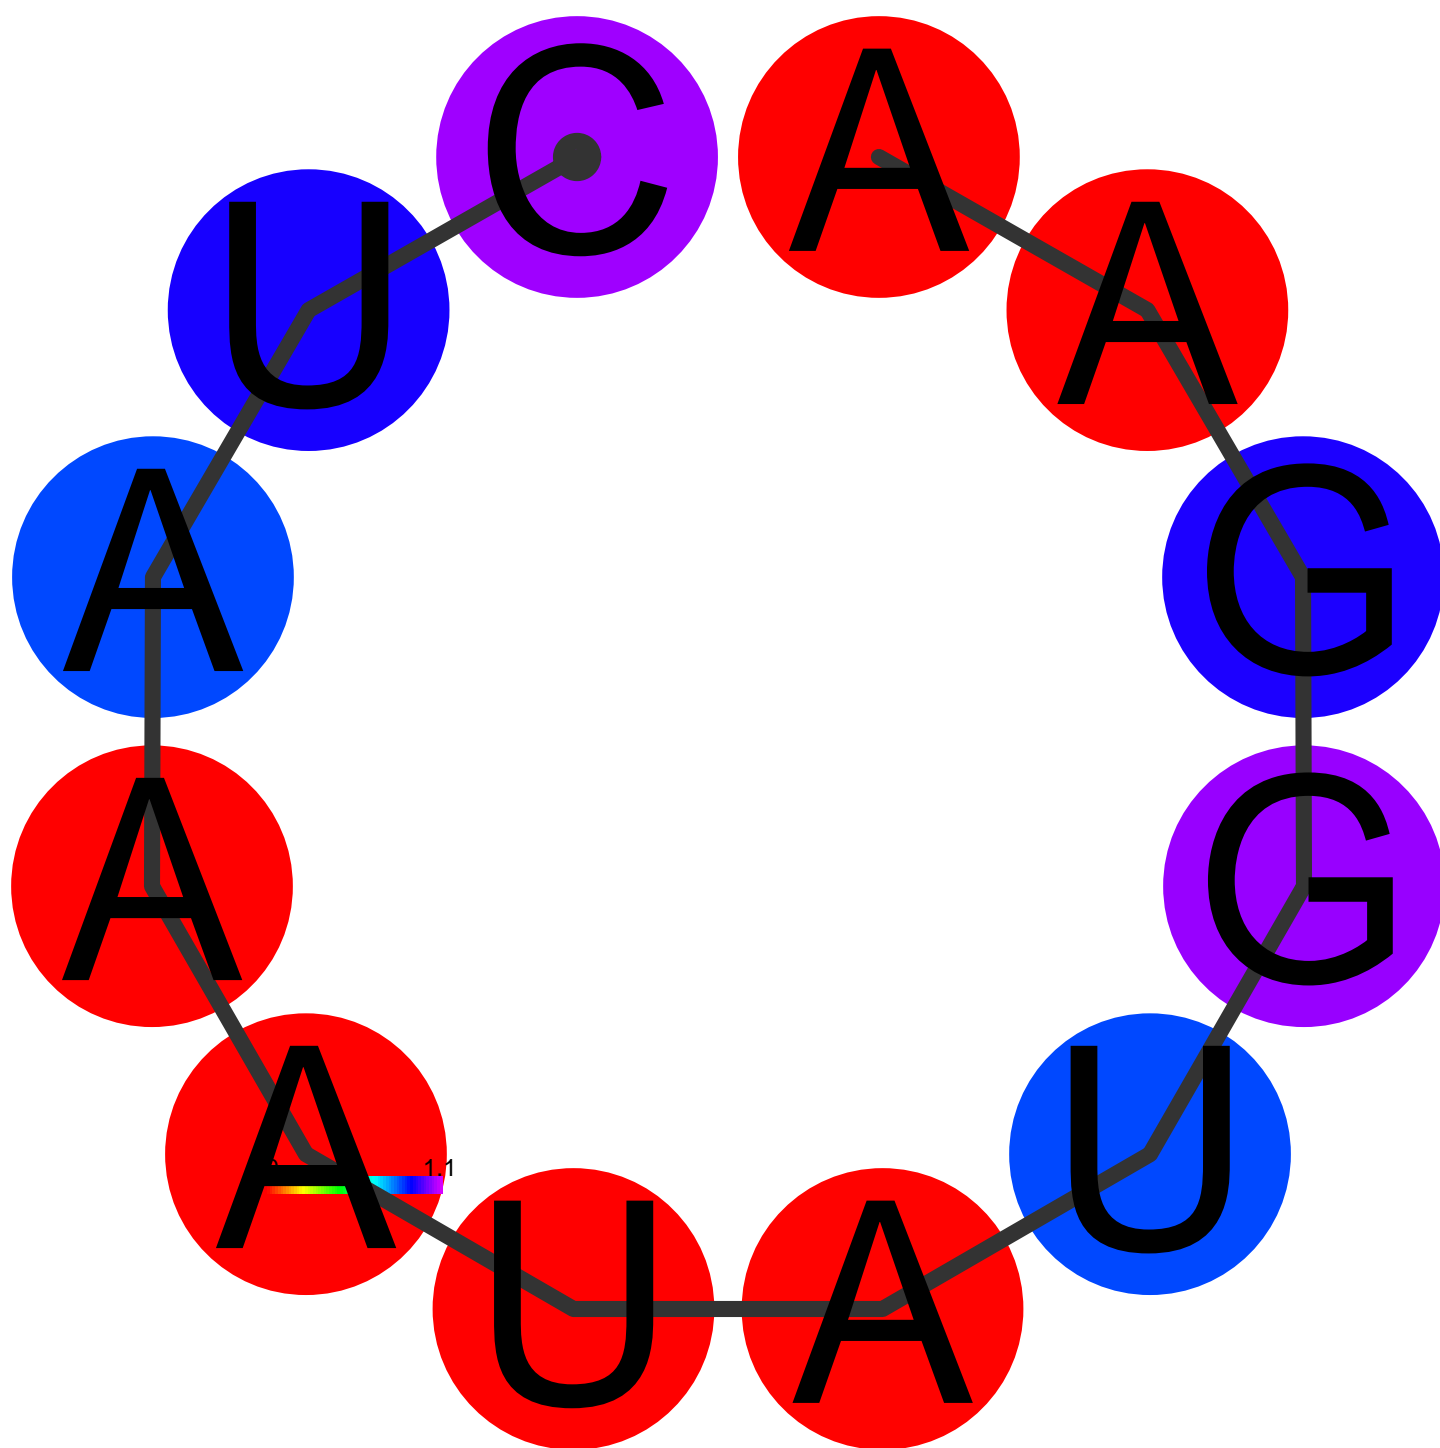

Supplement: Supplementary file 493 [file supplementary]

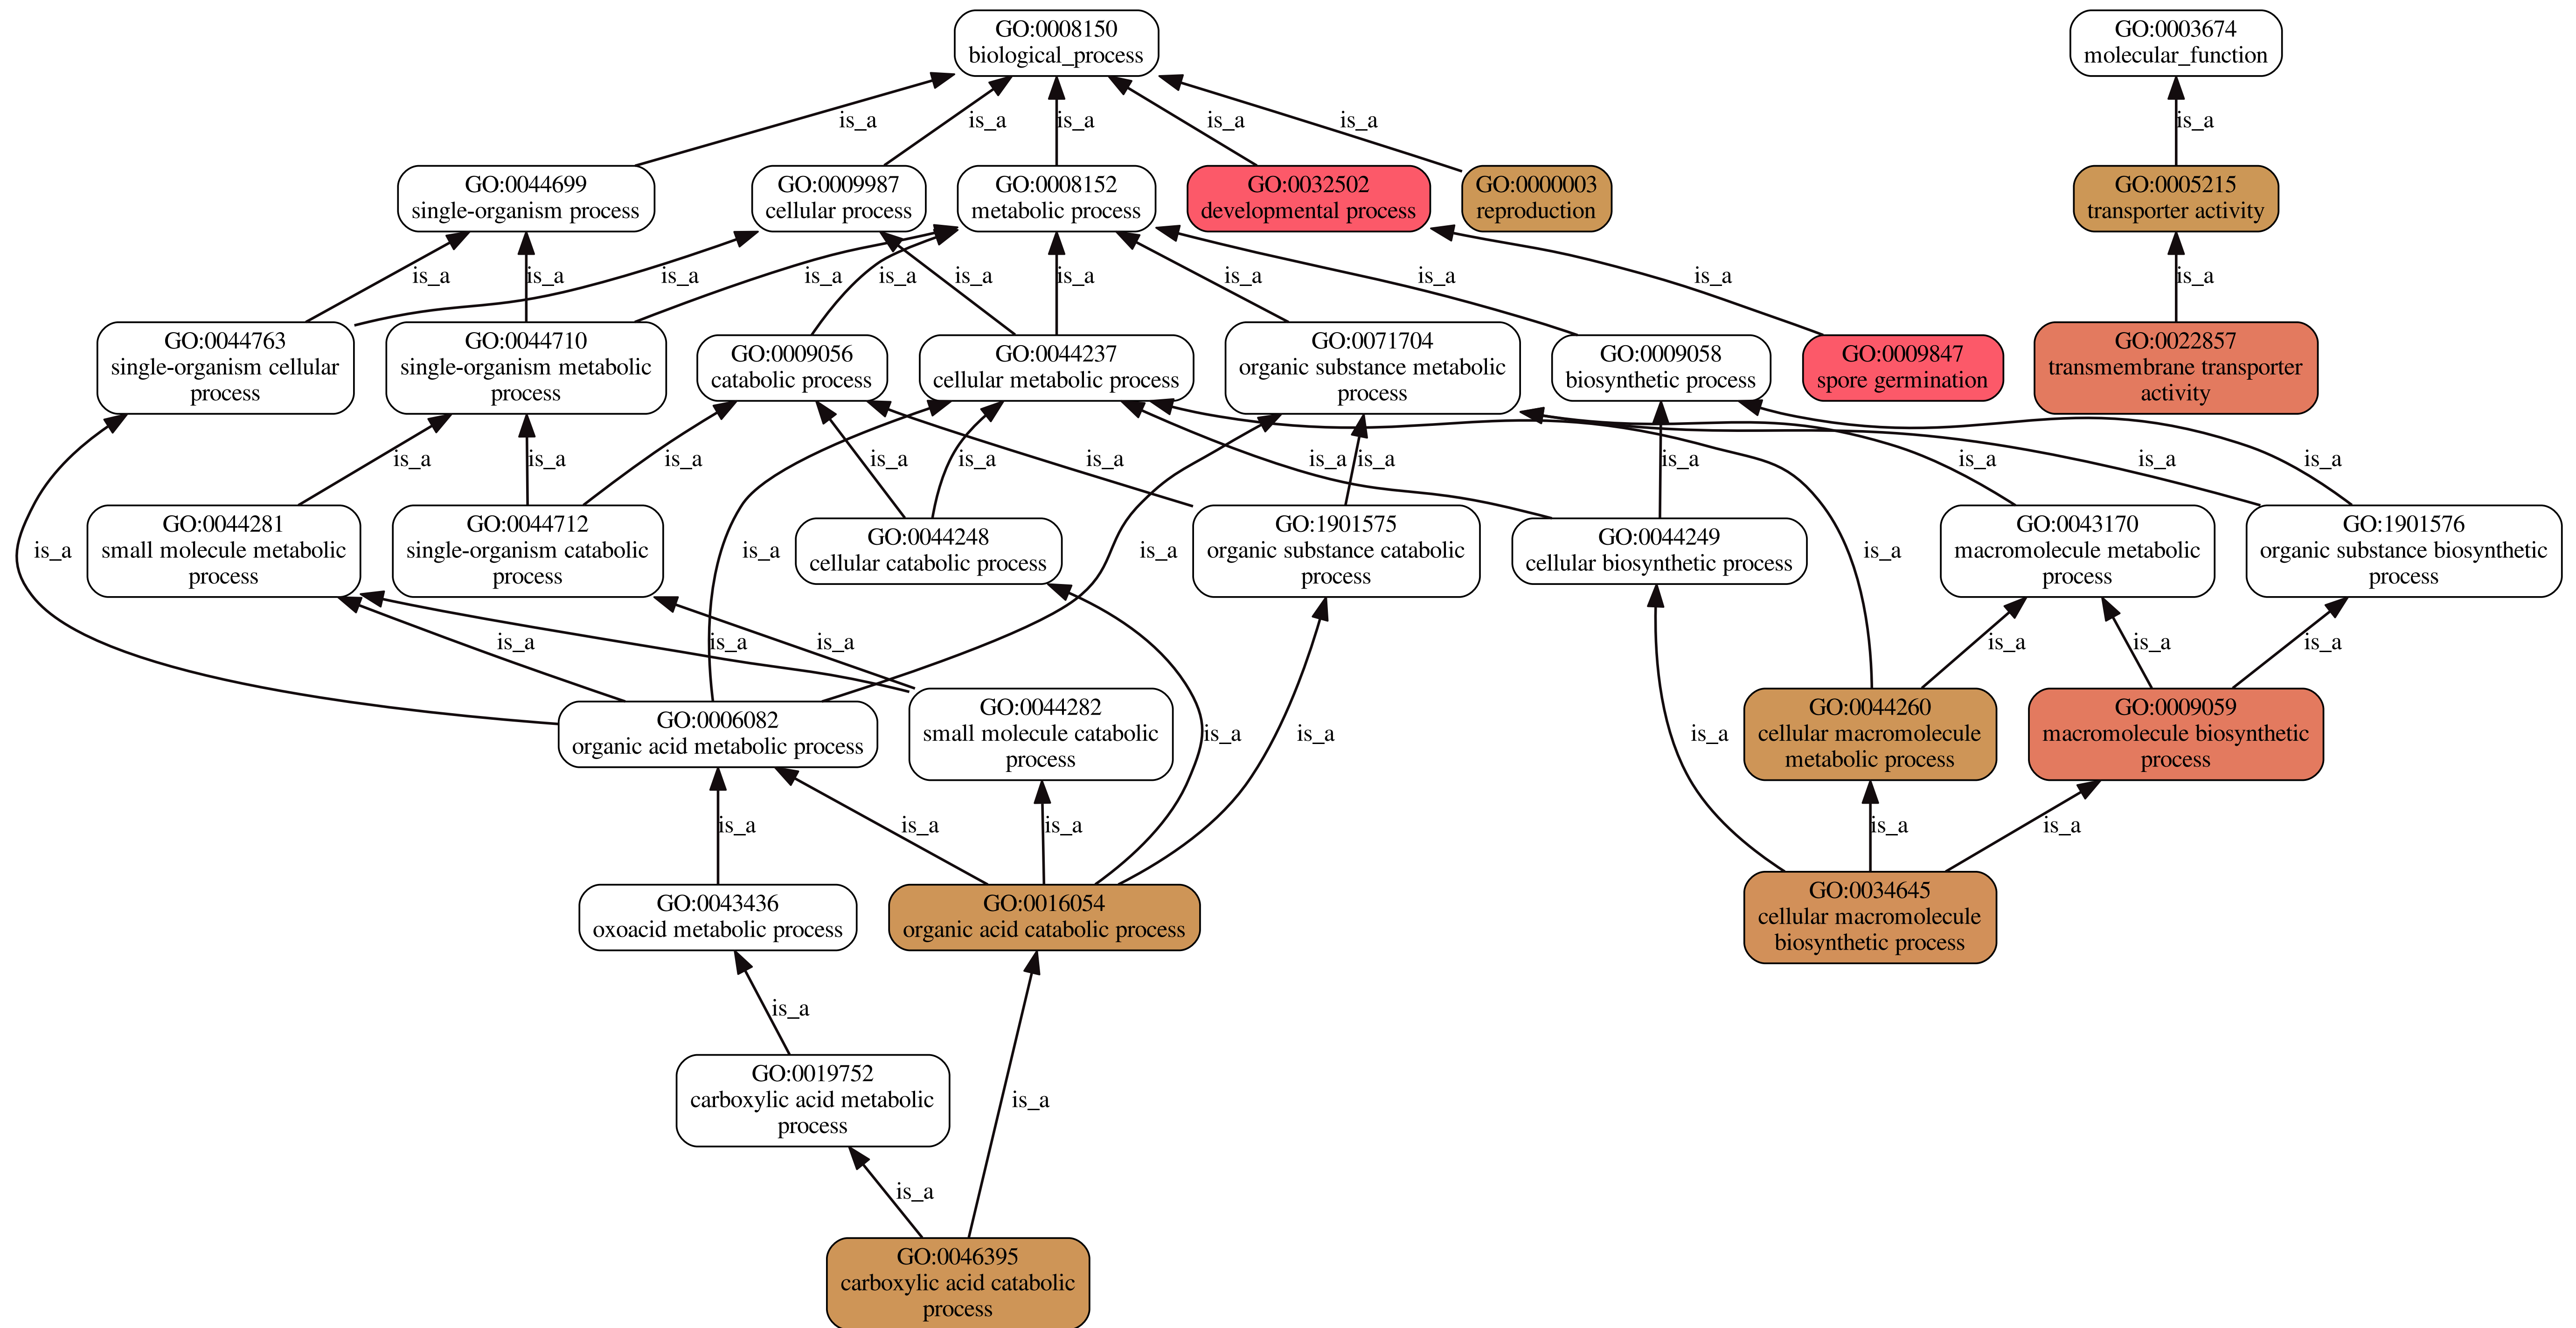

Supplement: Supplementary file 494 [file supplementary]

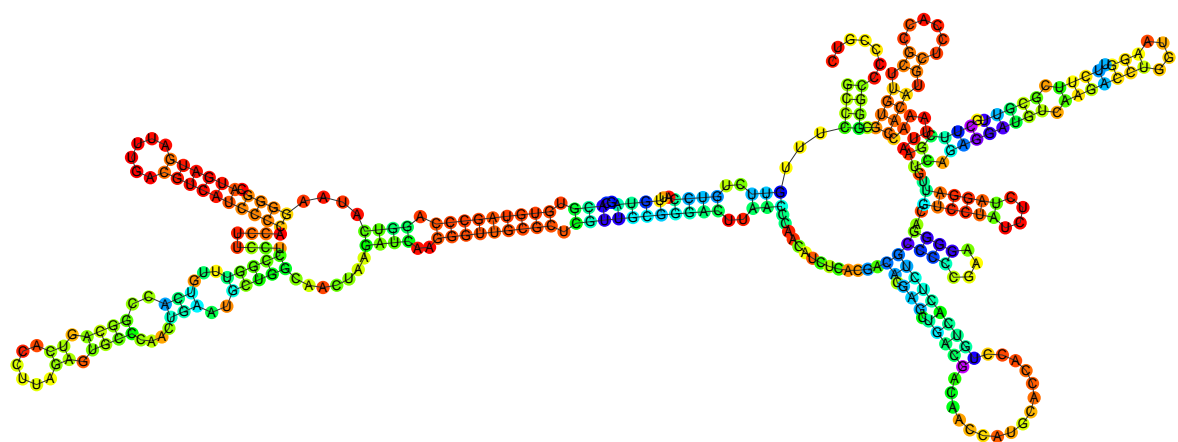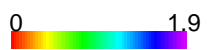

Supplement: Supplementary file 495 [file supplementary]

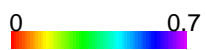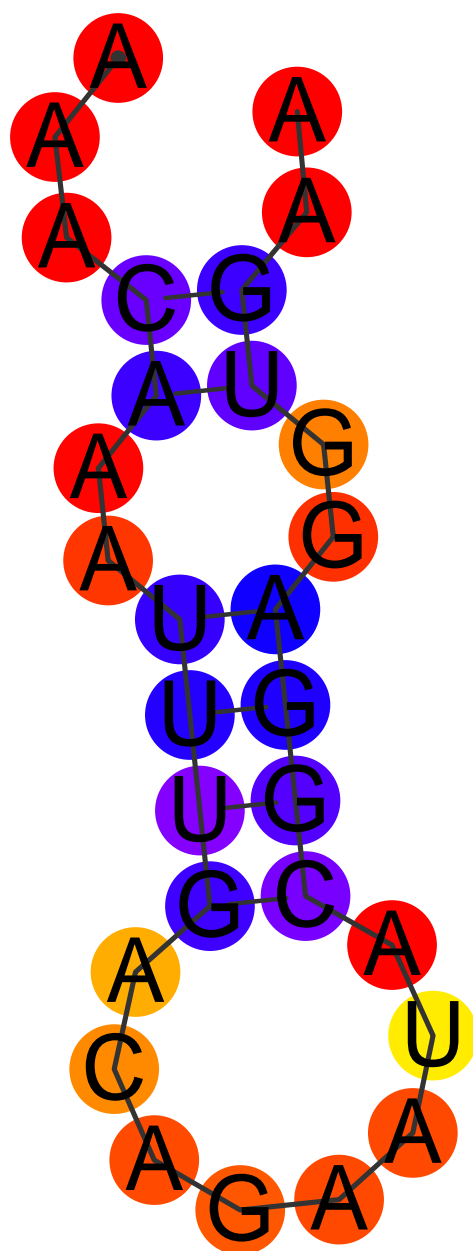

Supplement: Supplementary file 496 [file supplementary]

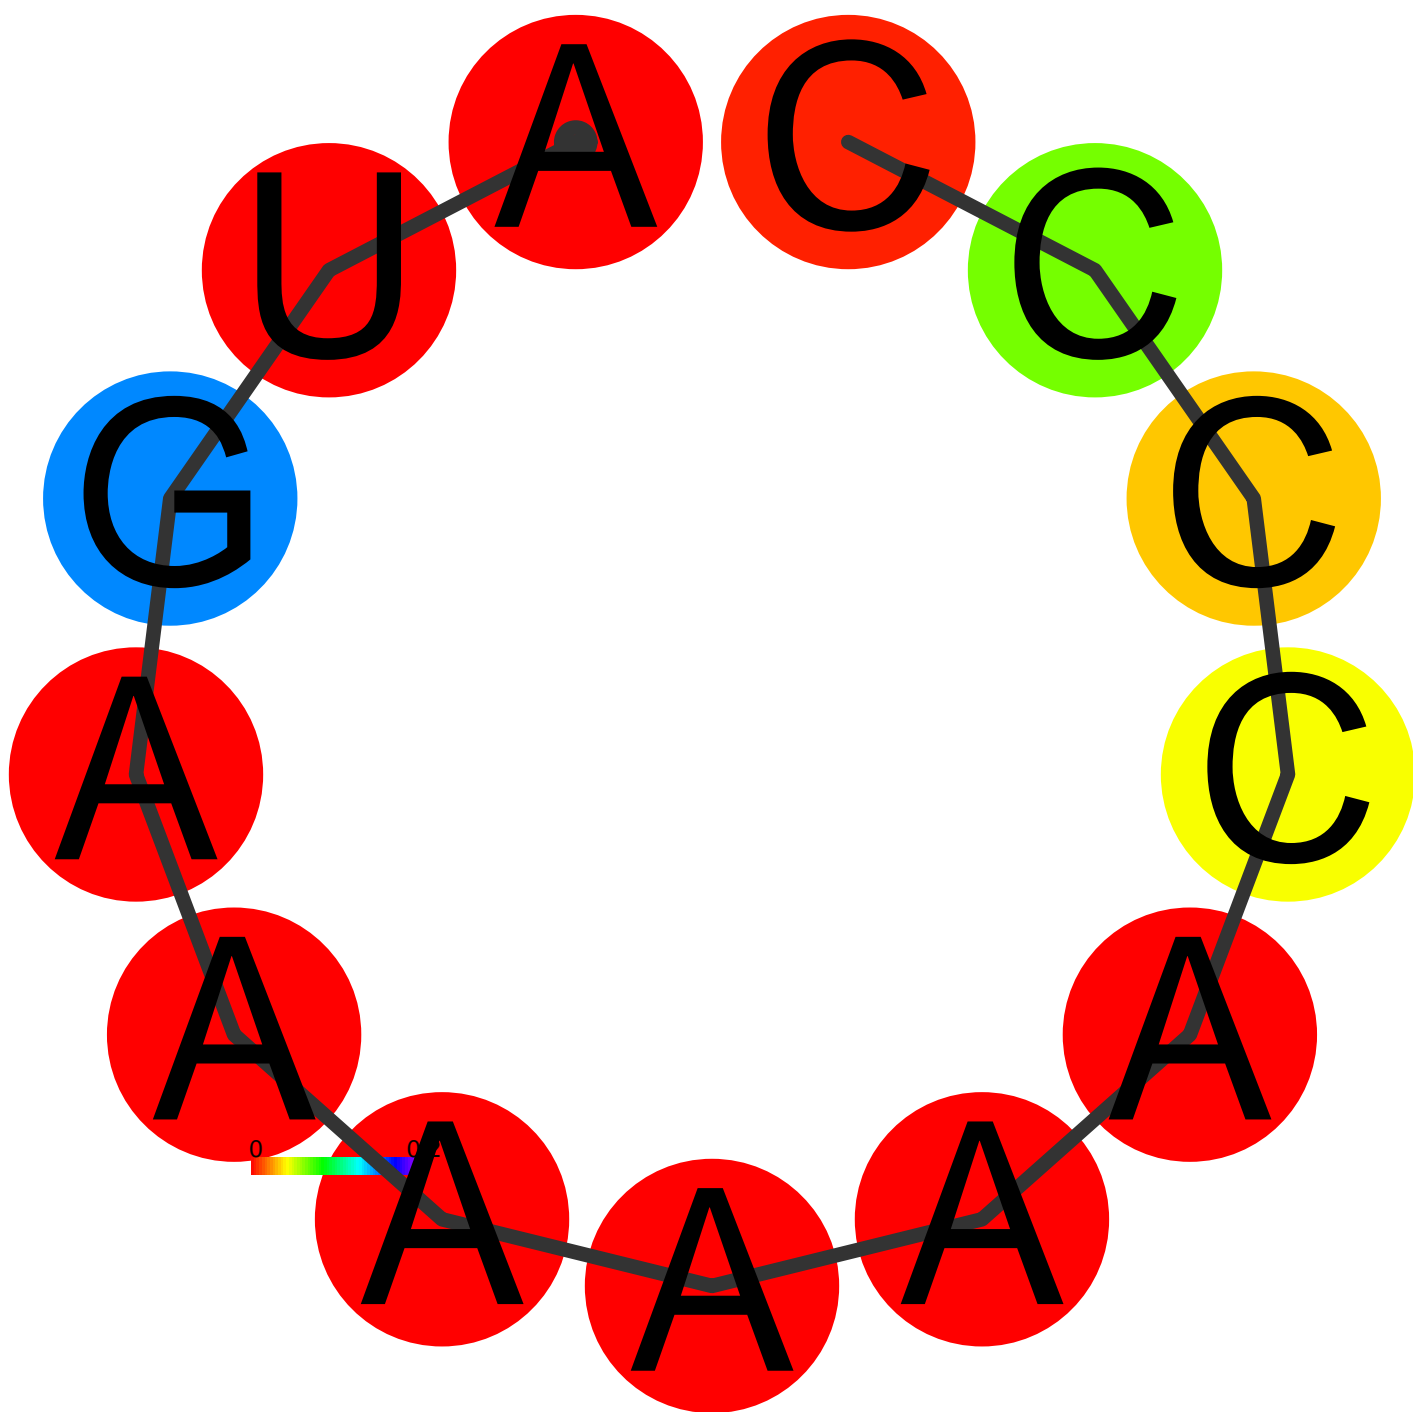

Supplement: Supplementary file 497 [file supplementary]

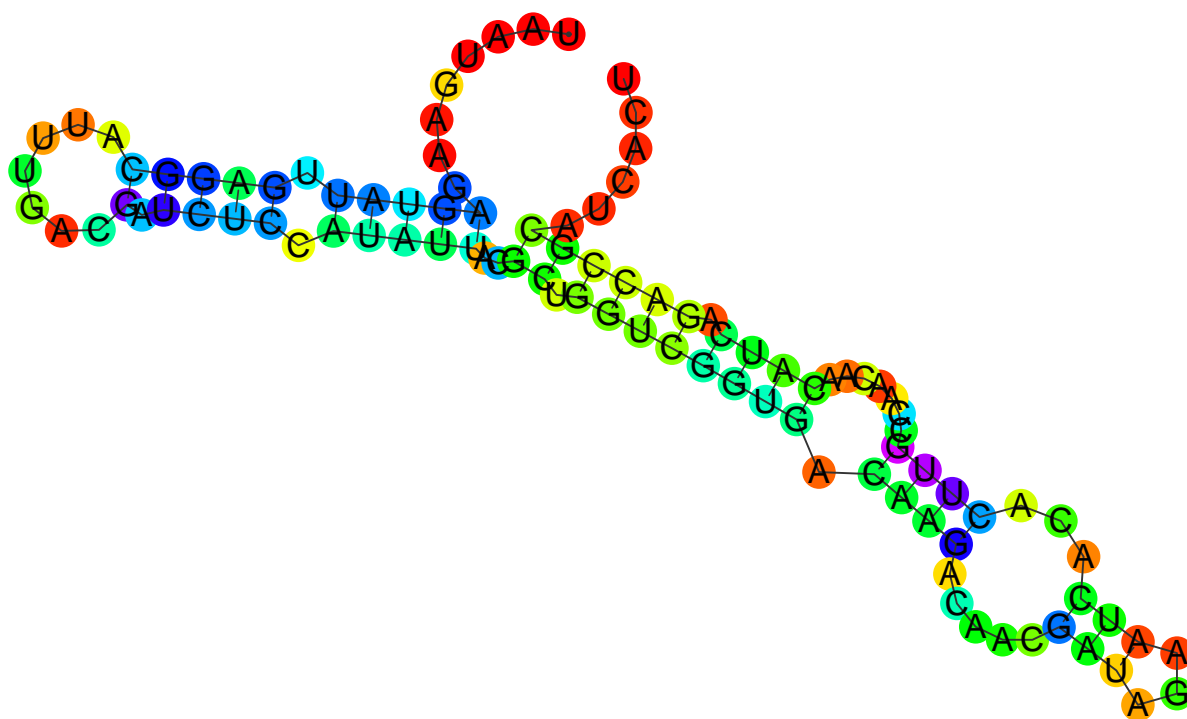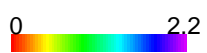

Supplement: Supplementary file 498 [file supplementary]

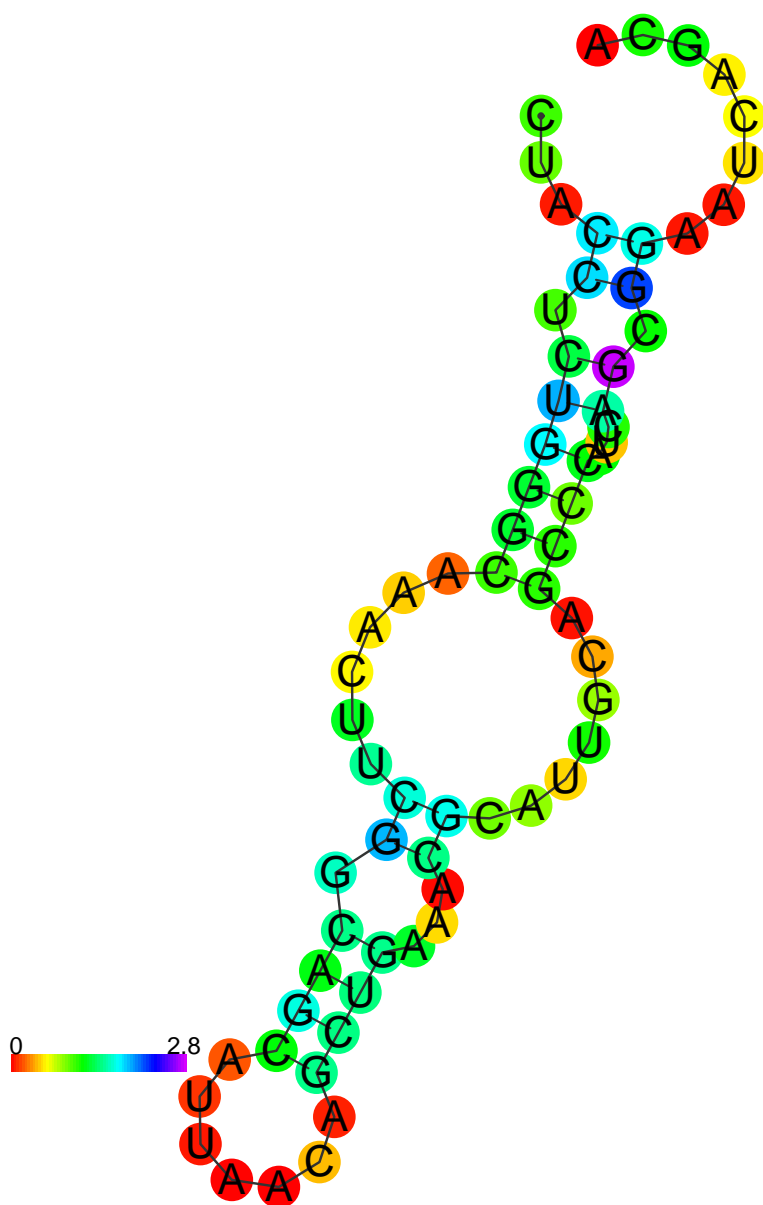

Supplement: Supplementary file 499 [file supplementary]

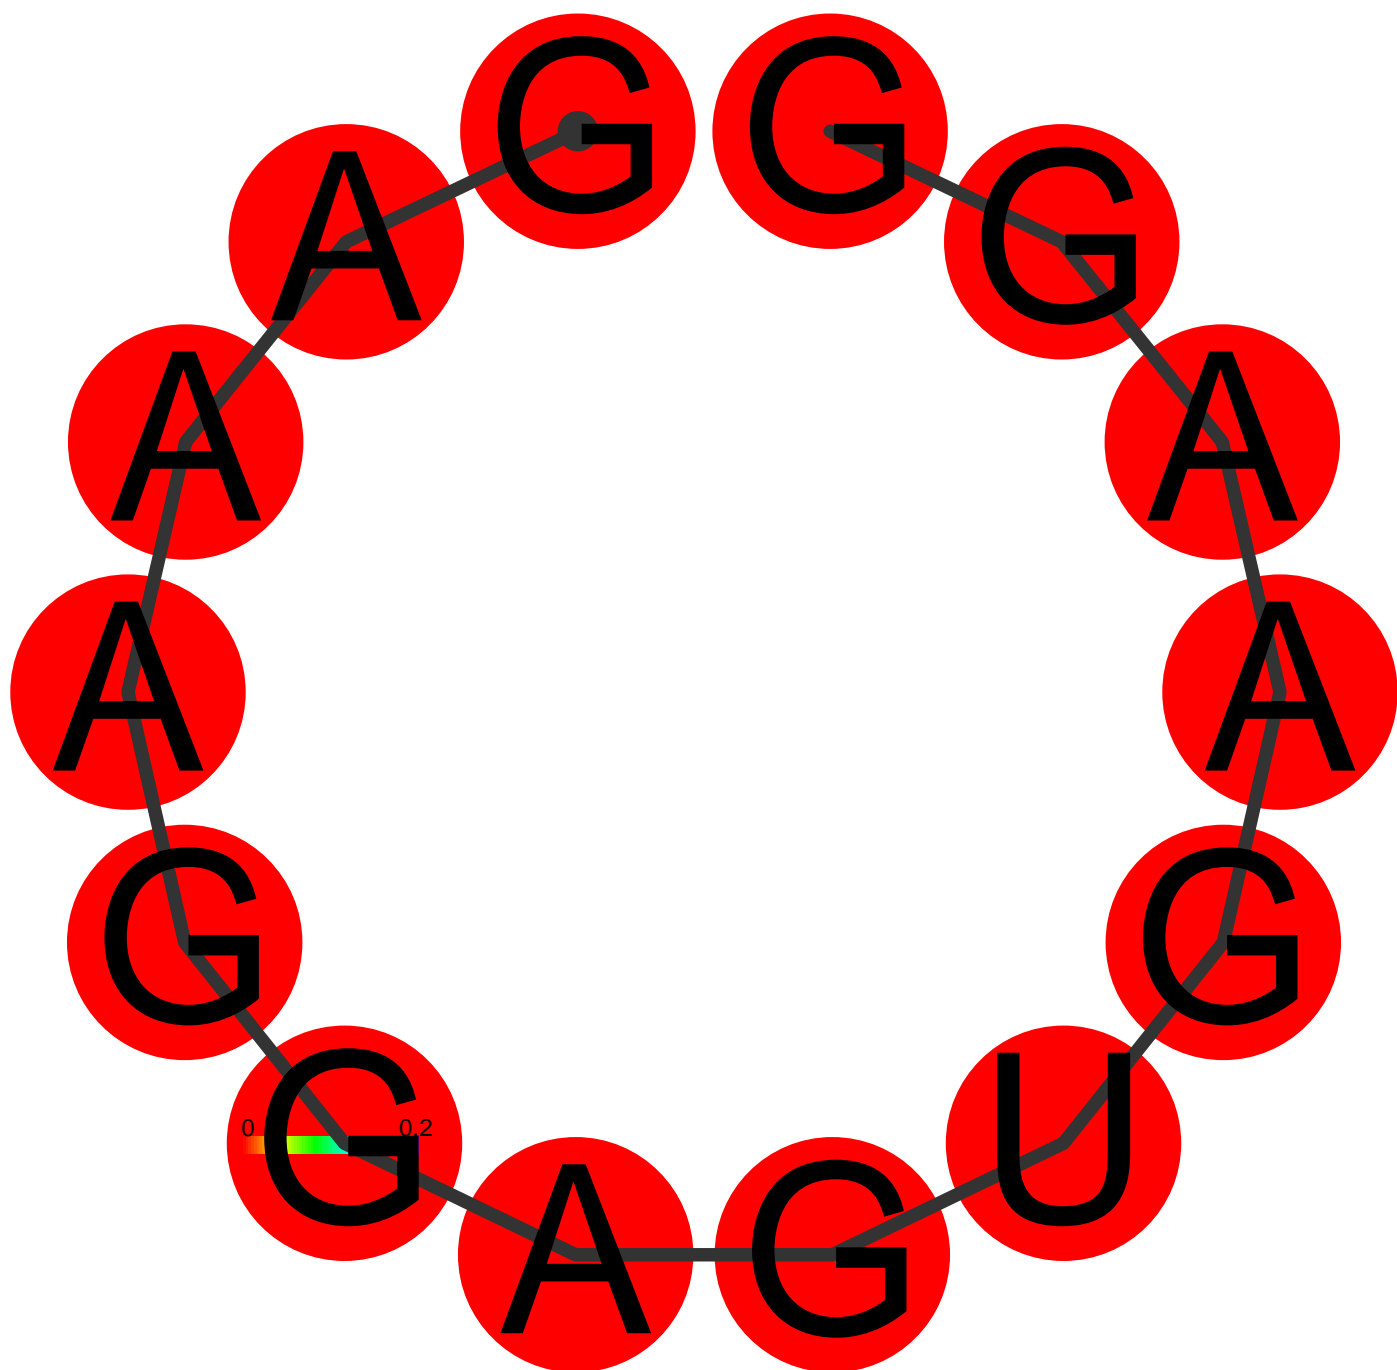

Supplement: Supplementary file 500 [file supplementary]
