# Supplementary figures and images for: Understanding the Effect of Different Glucose Concentrations in the Oligotrophic Bacterium Bacillus subtilis BS-G1 through Transcriptomics Analysis (part 6 of 6)
Source: Preprints.org preprint supplement (doi:10.20944/preprints202308.1891.v1), 2023-08-29

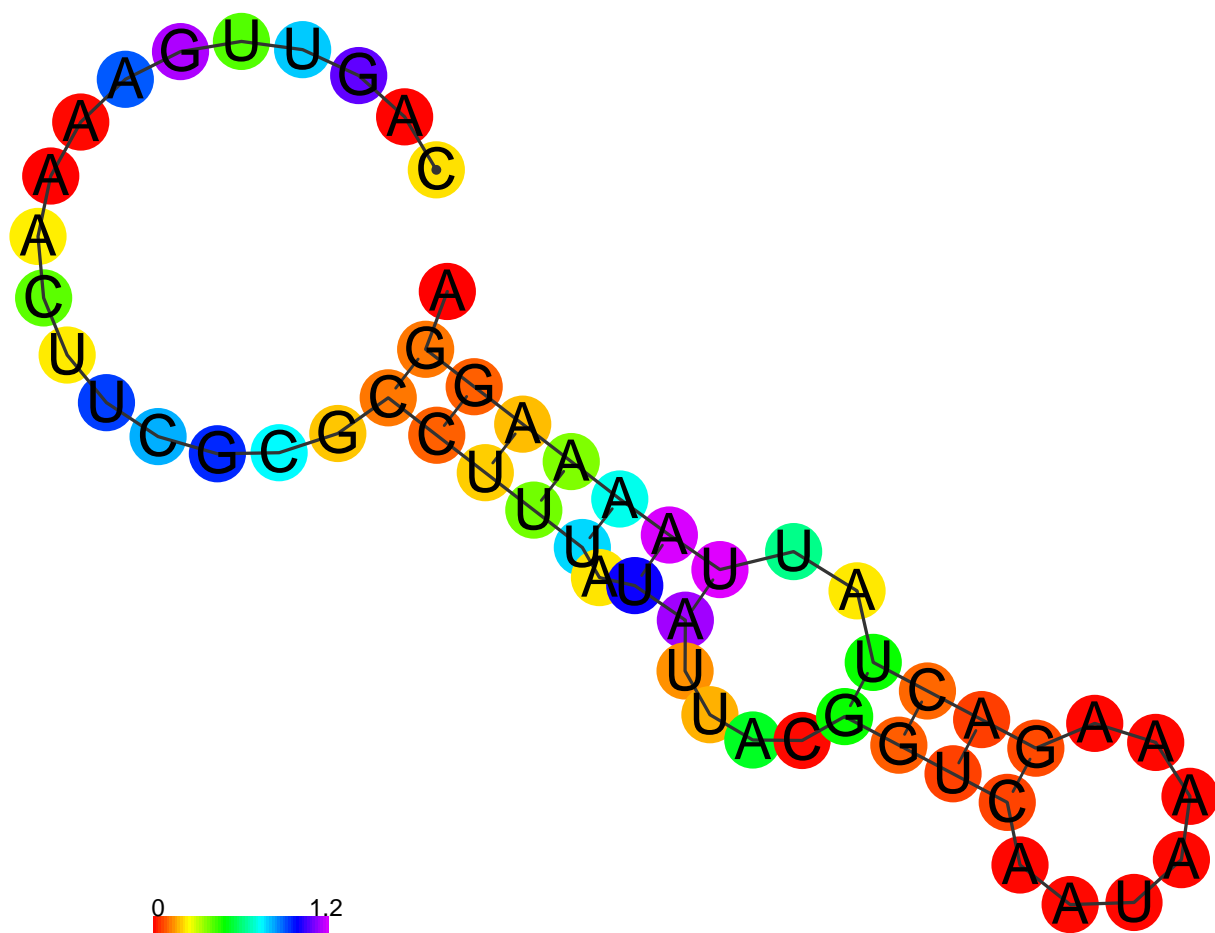

Supplement: Supplementary file 501 [file supplementary]

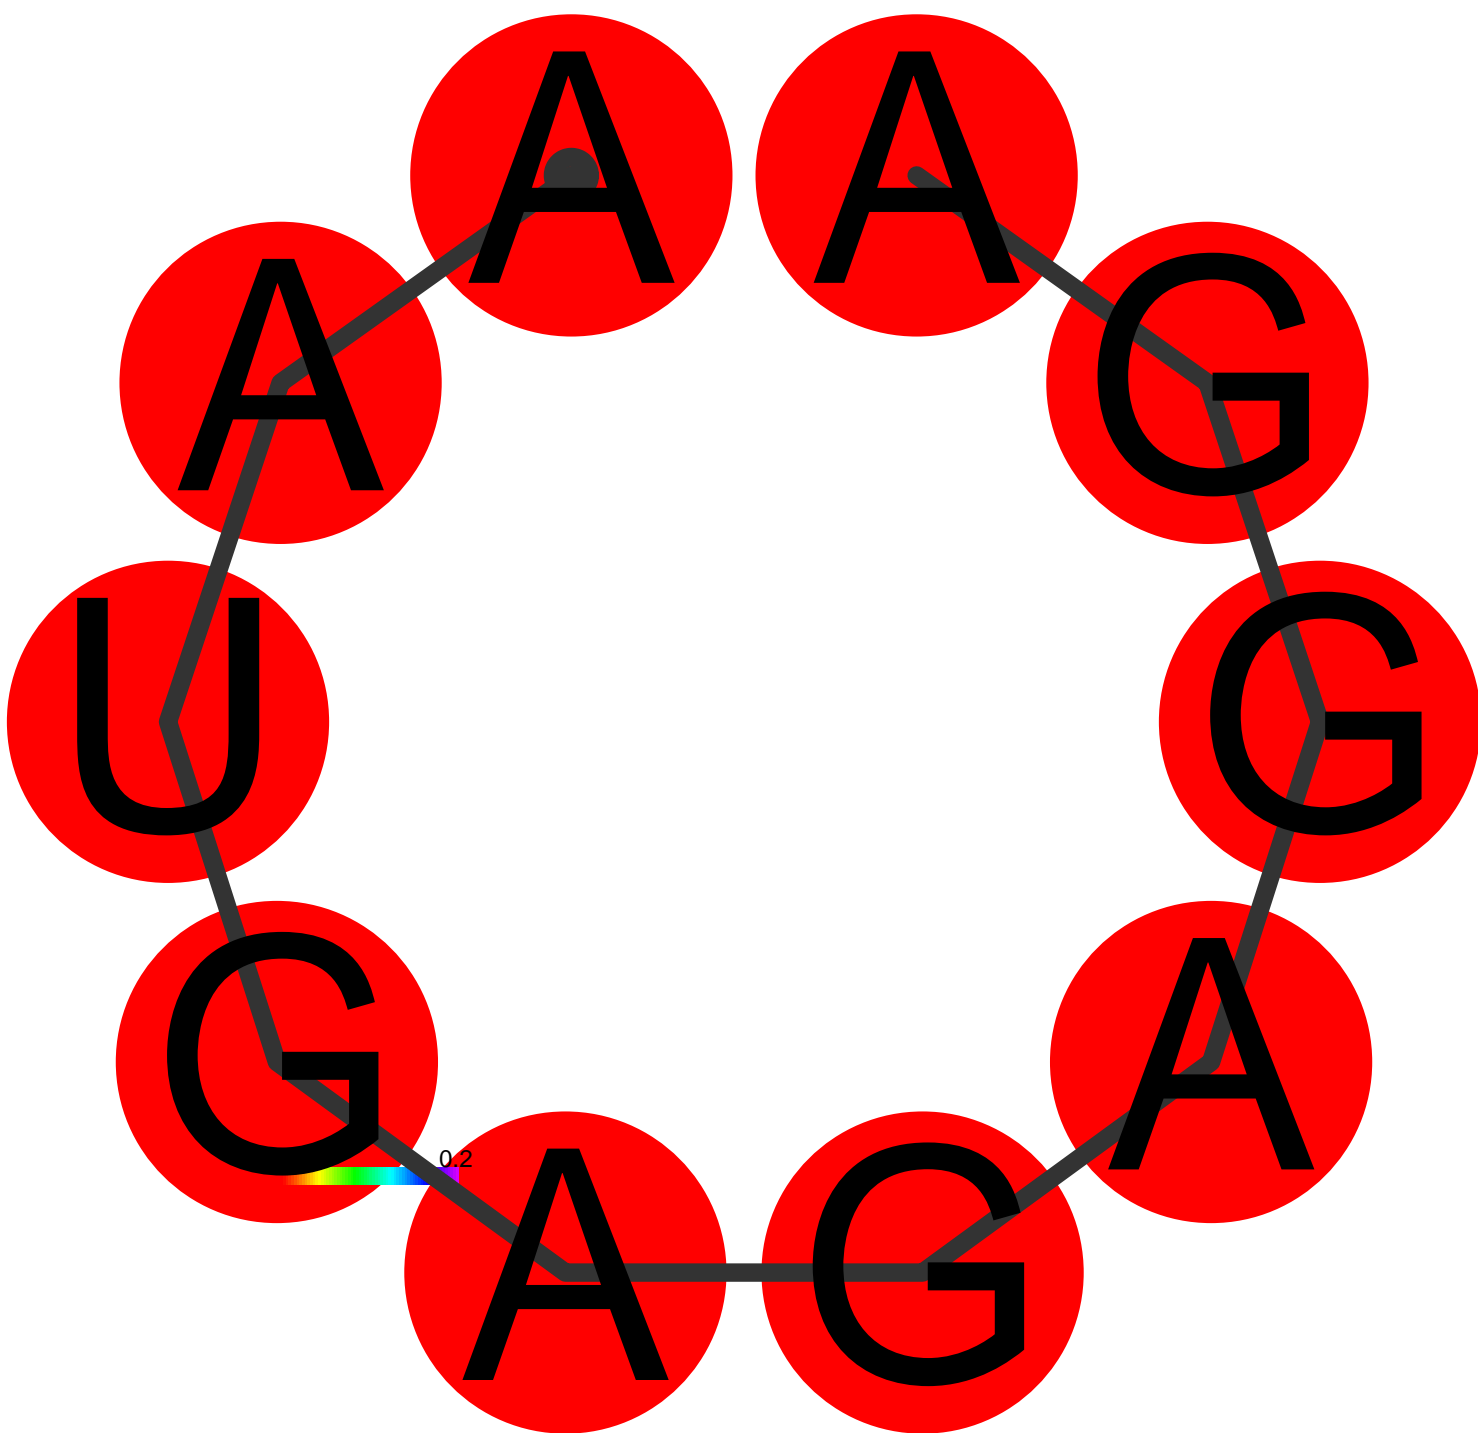

Supplement: Supplementary file 502 [file supplementary]

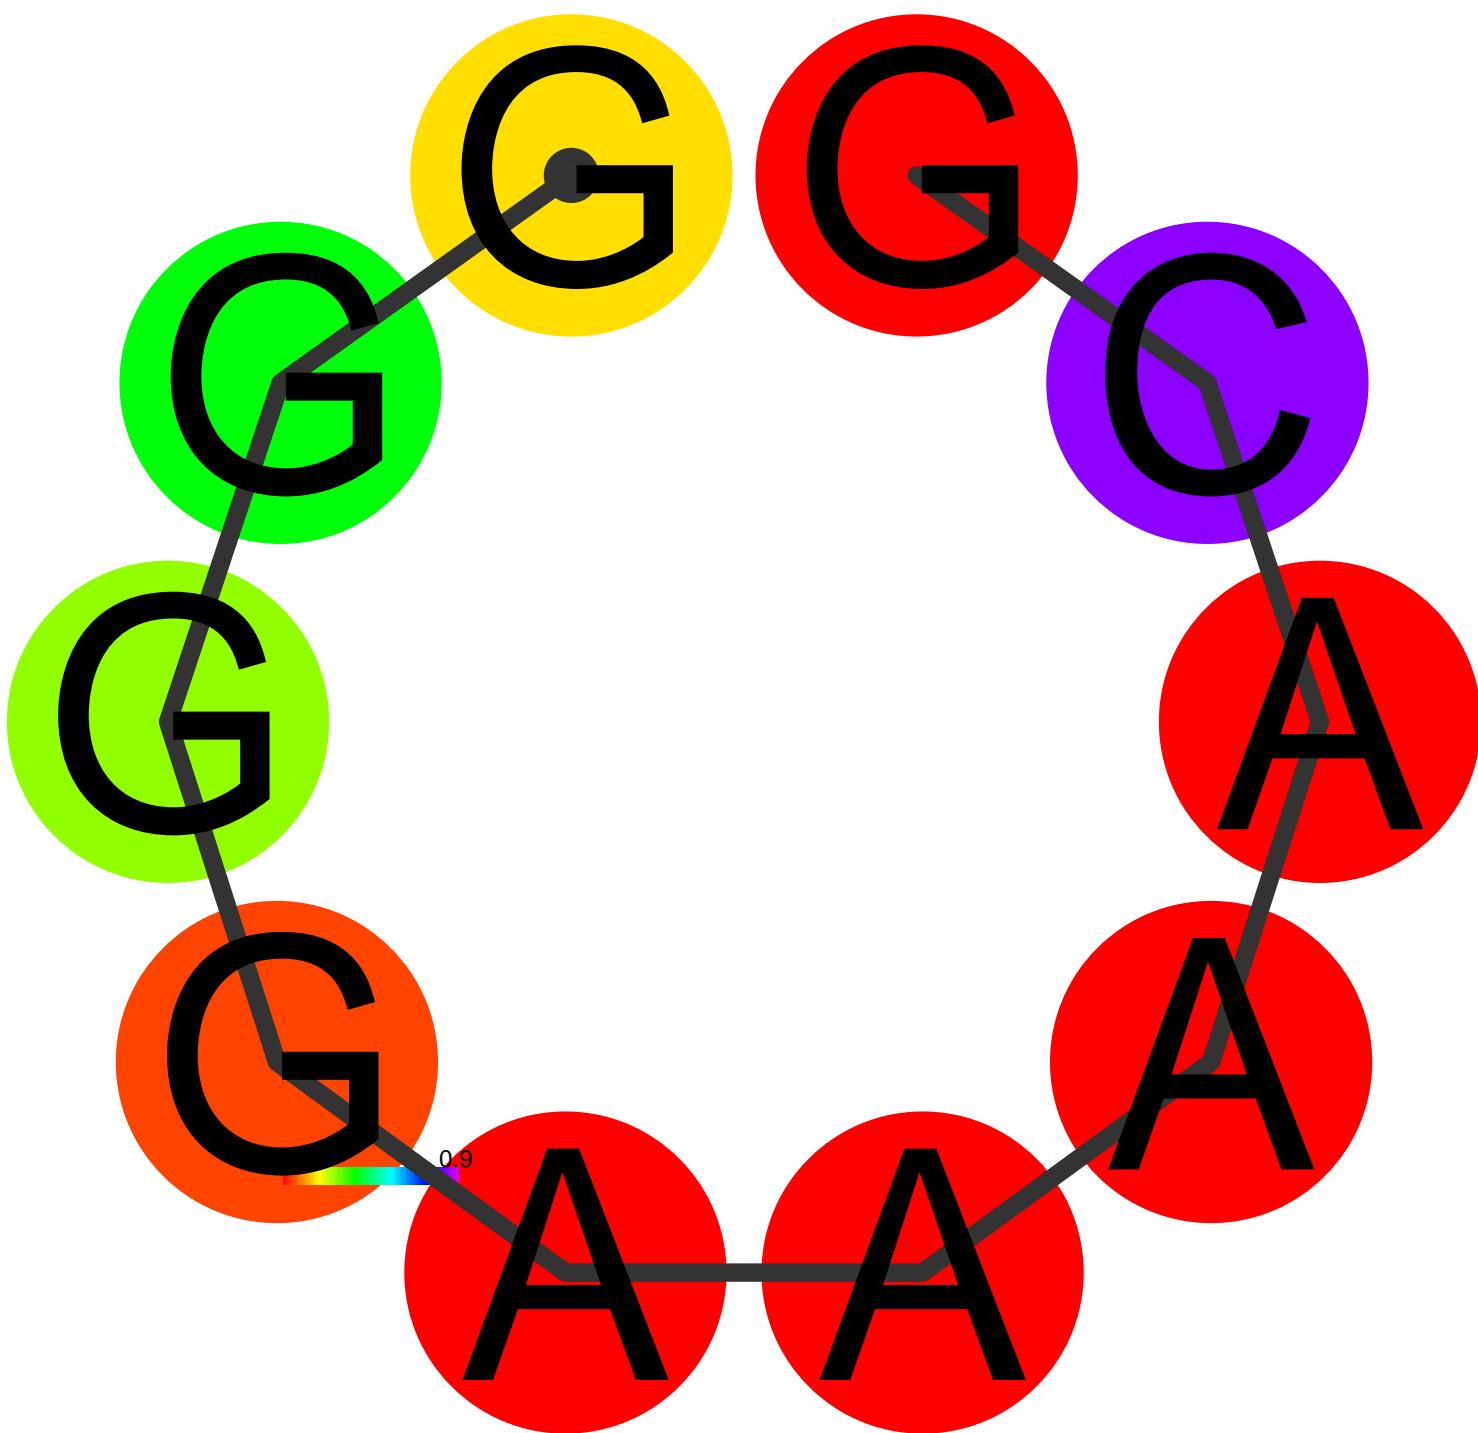

Supplement: Supplementary file 503 [file supplementary]

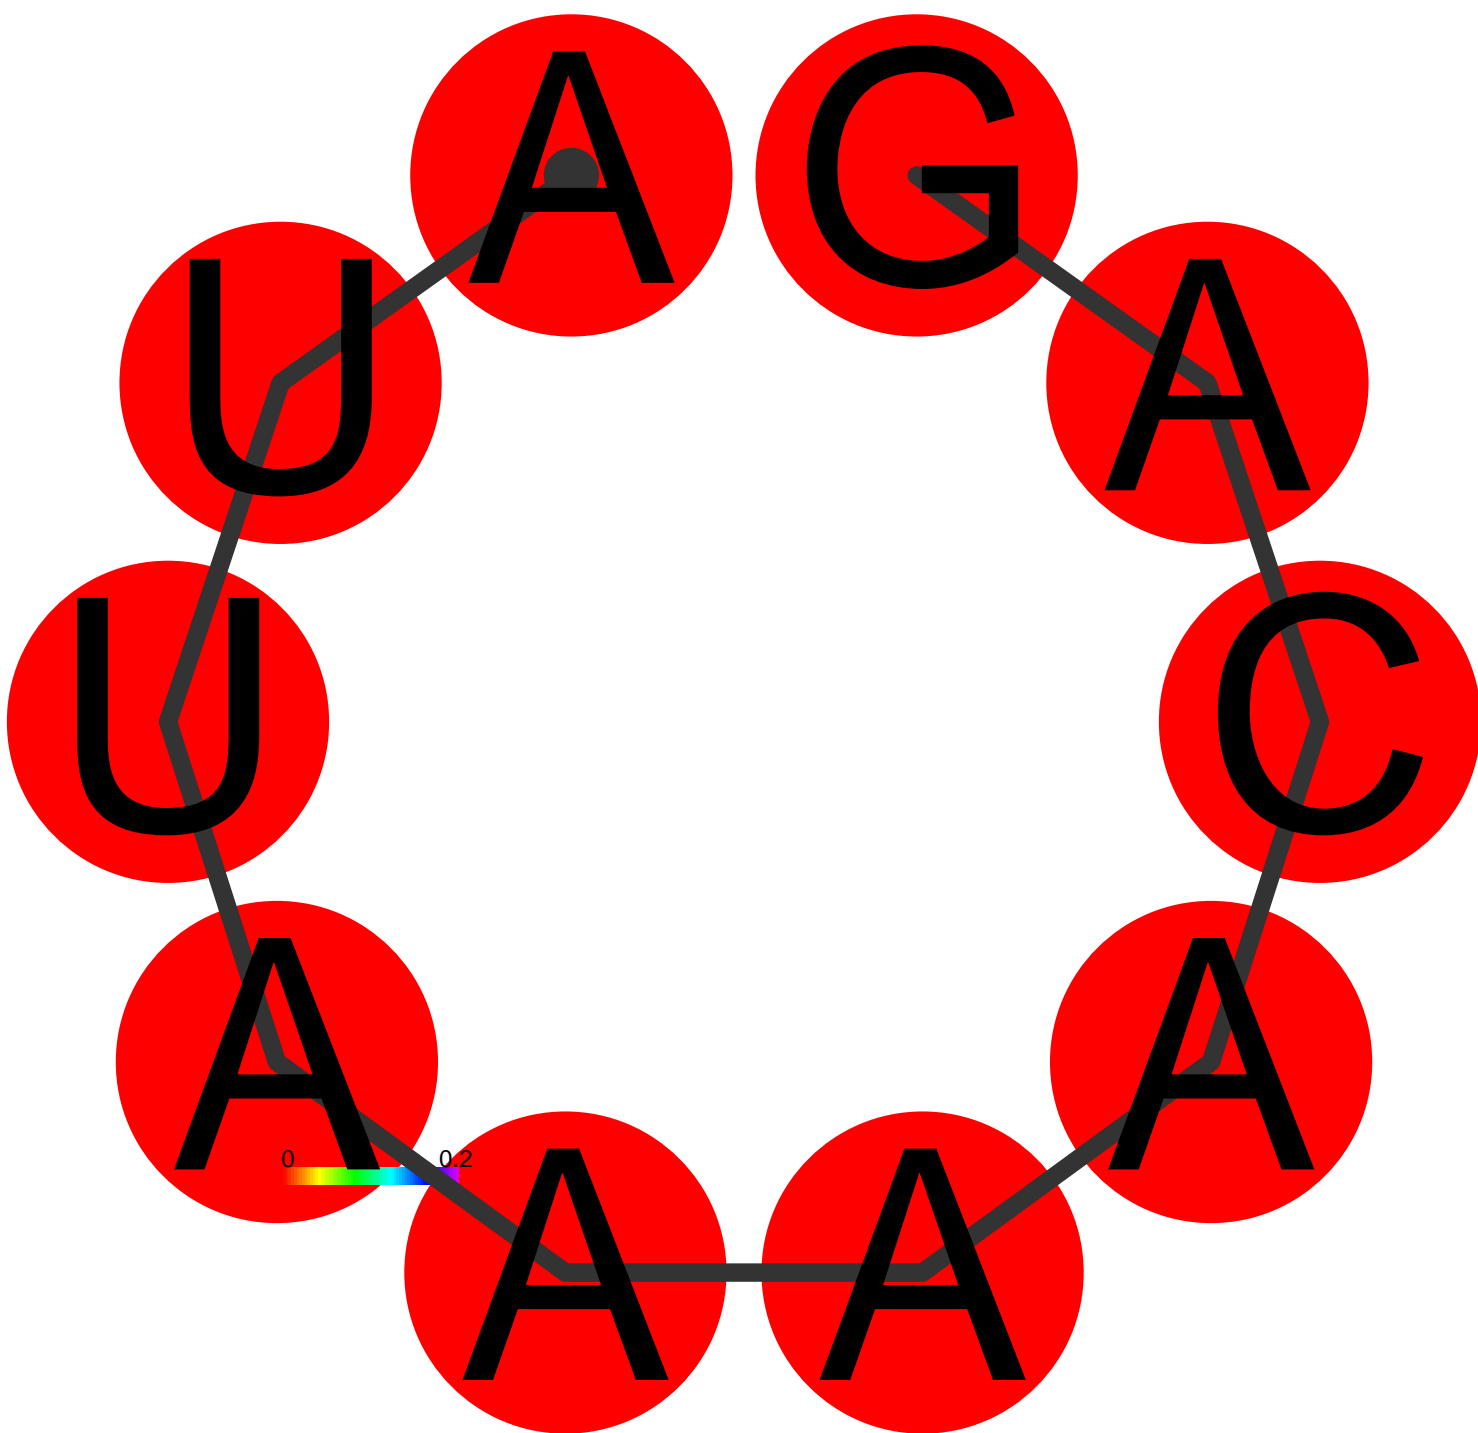

Supplement: Supplementary file 504 [file supplementary]

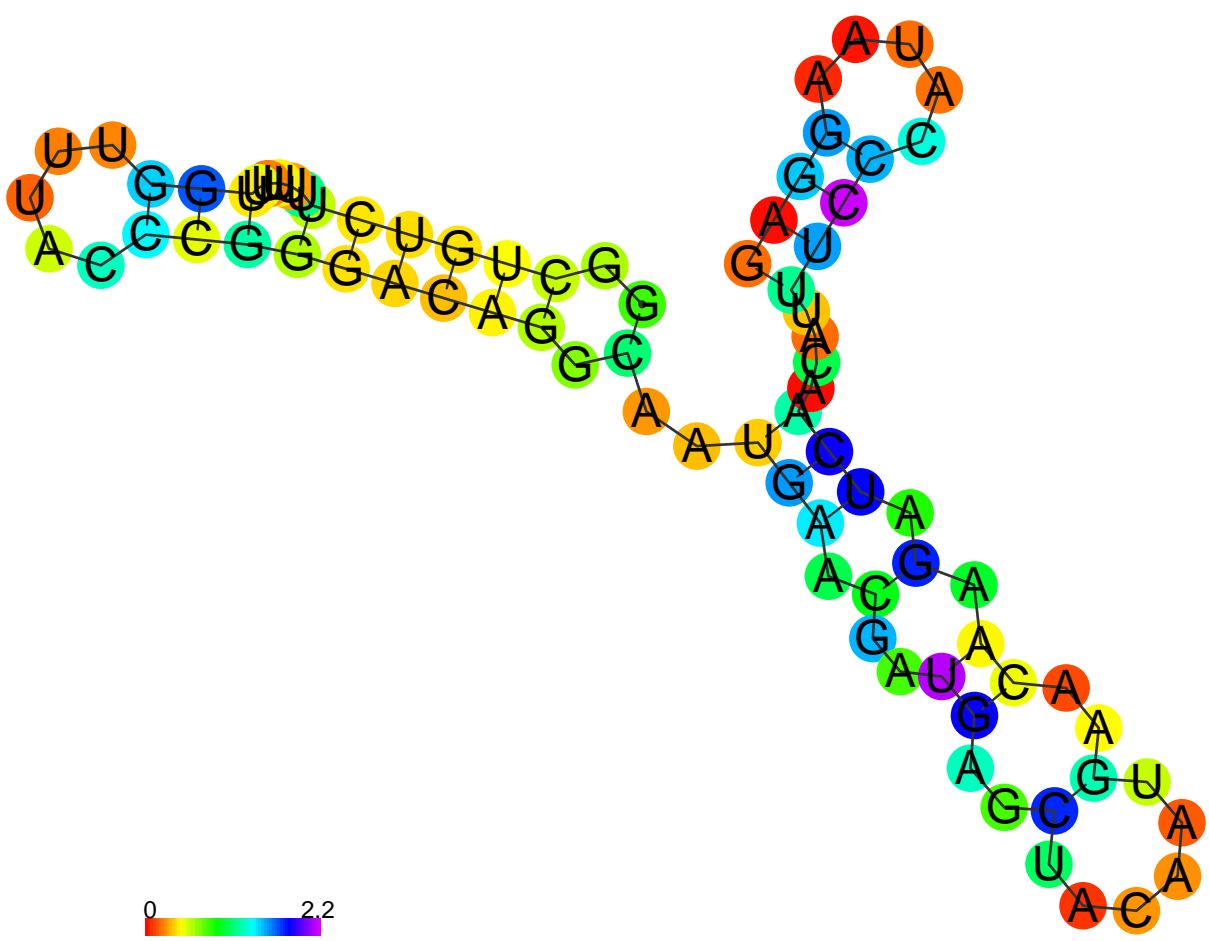

Supplement: Supplementary file 505 [file supplementary]

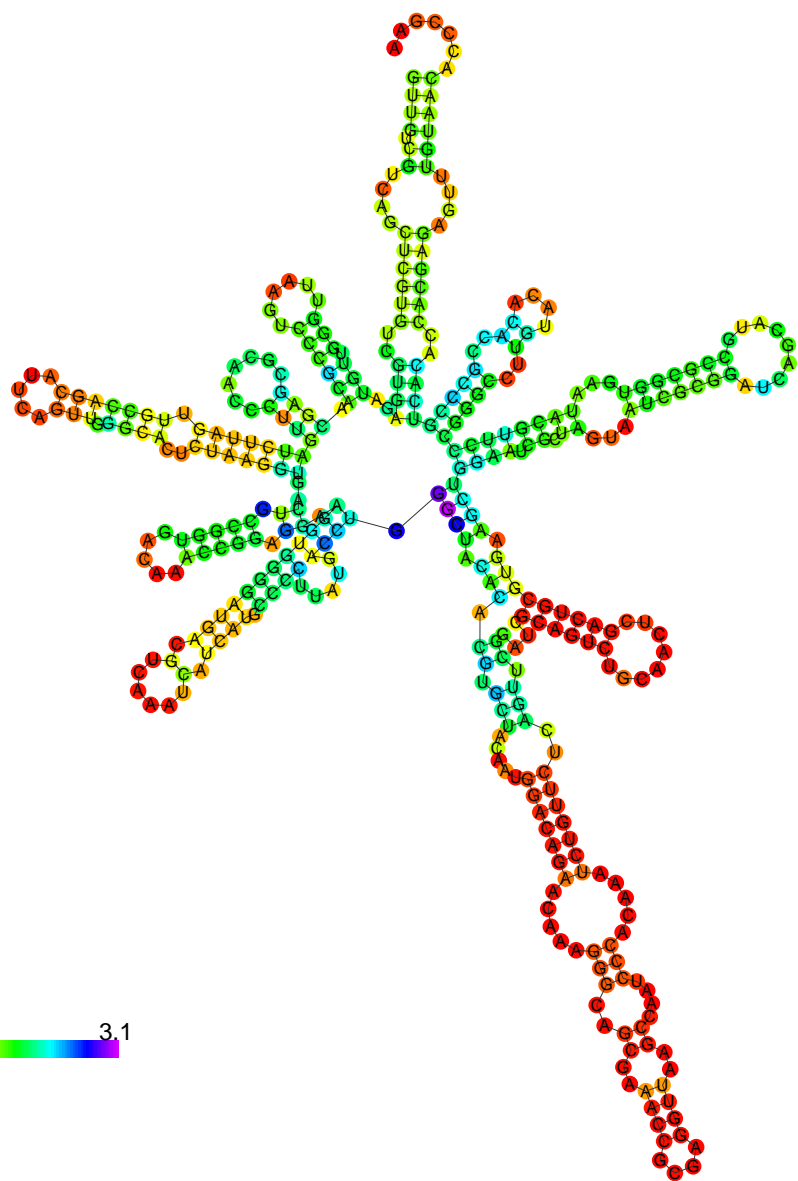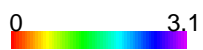

Supplement: Supplementary file 506 [file supplementary]

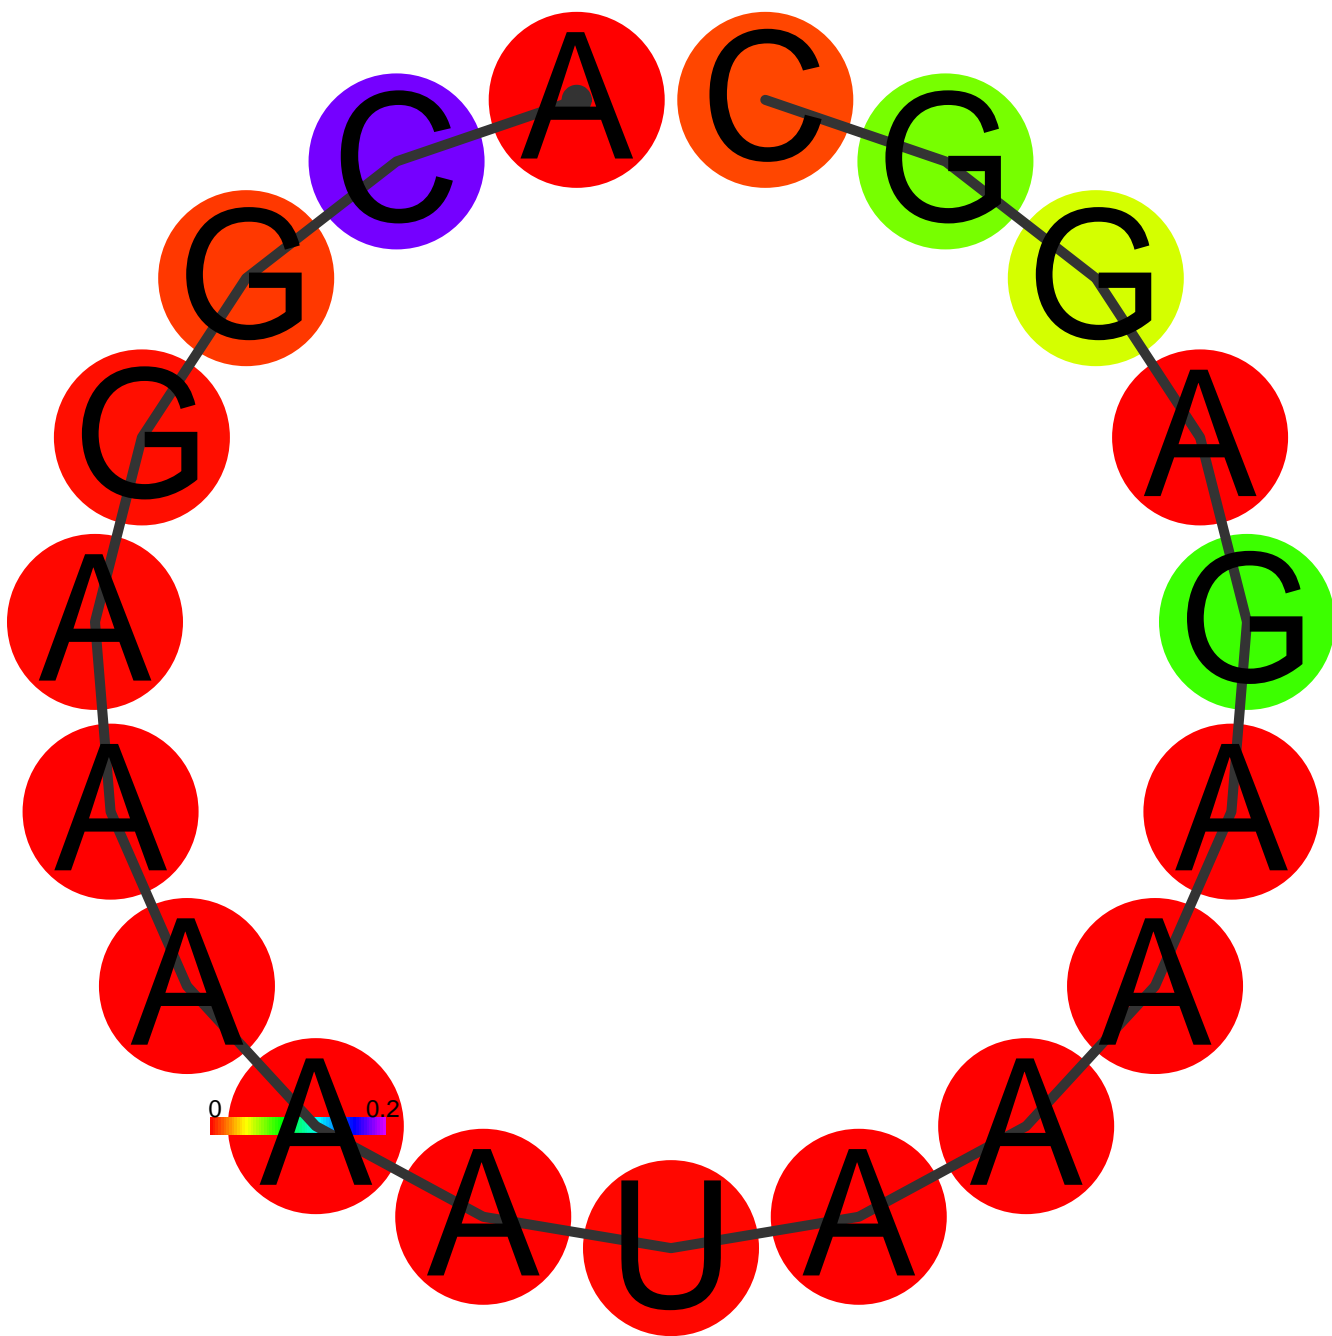

Supplement: Supplementary file 507 [file supplementary]

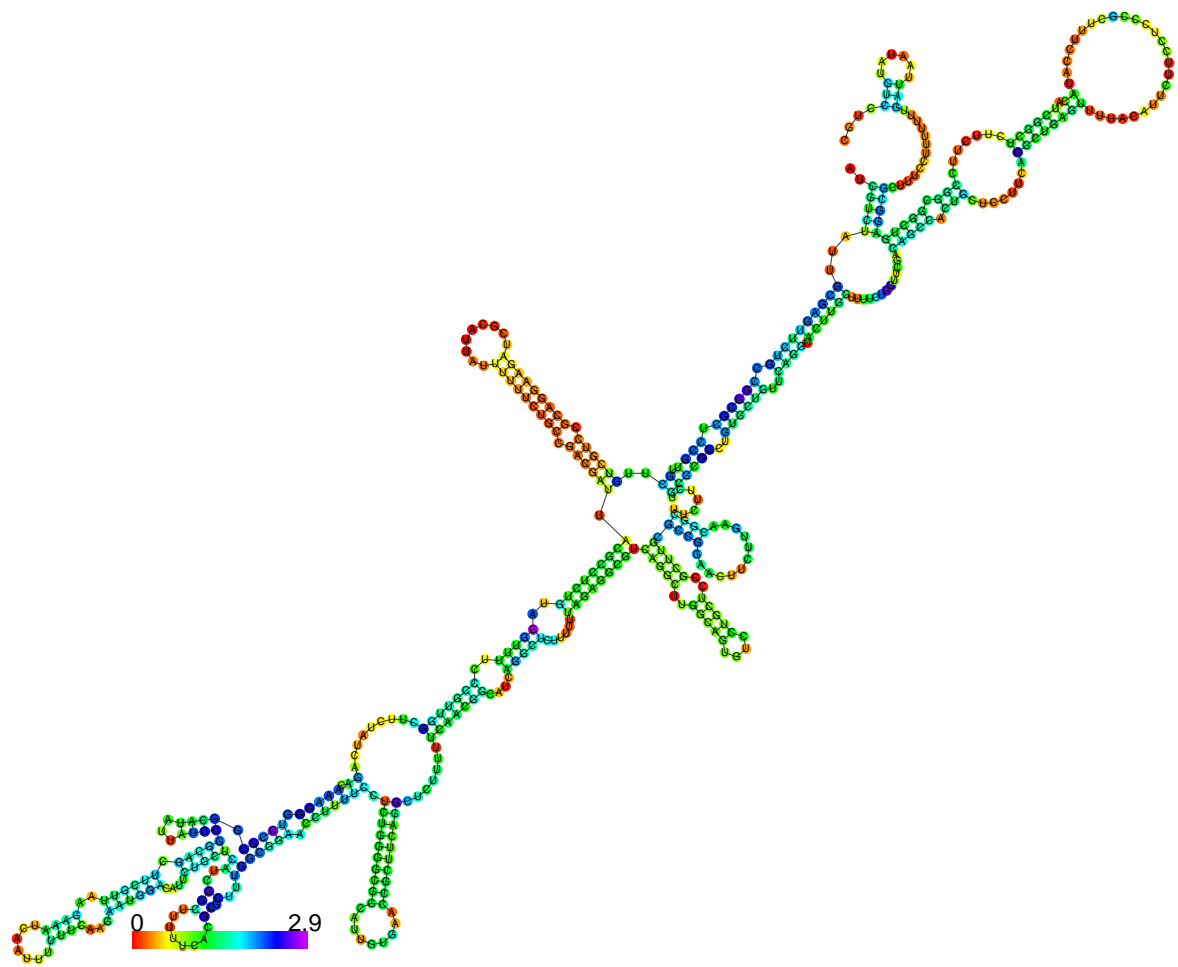

Supplement: Supplementary file 508 [file supplementary]

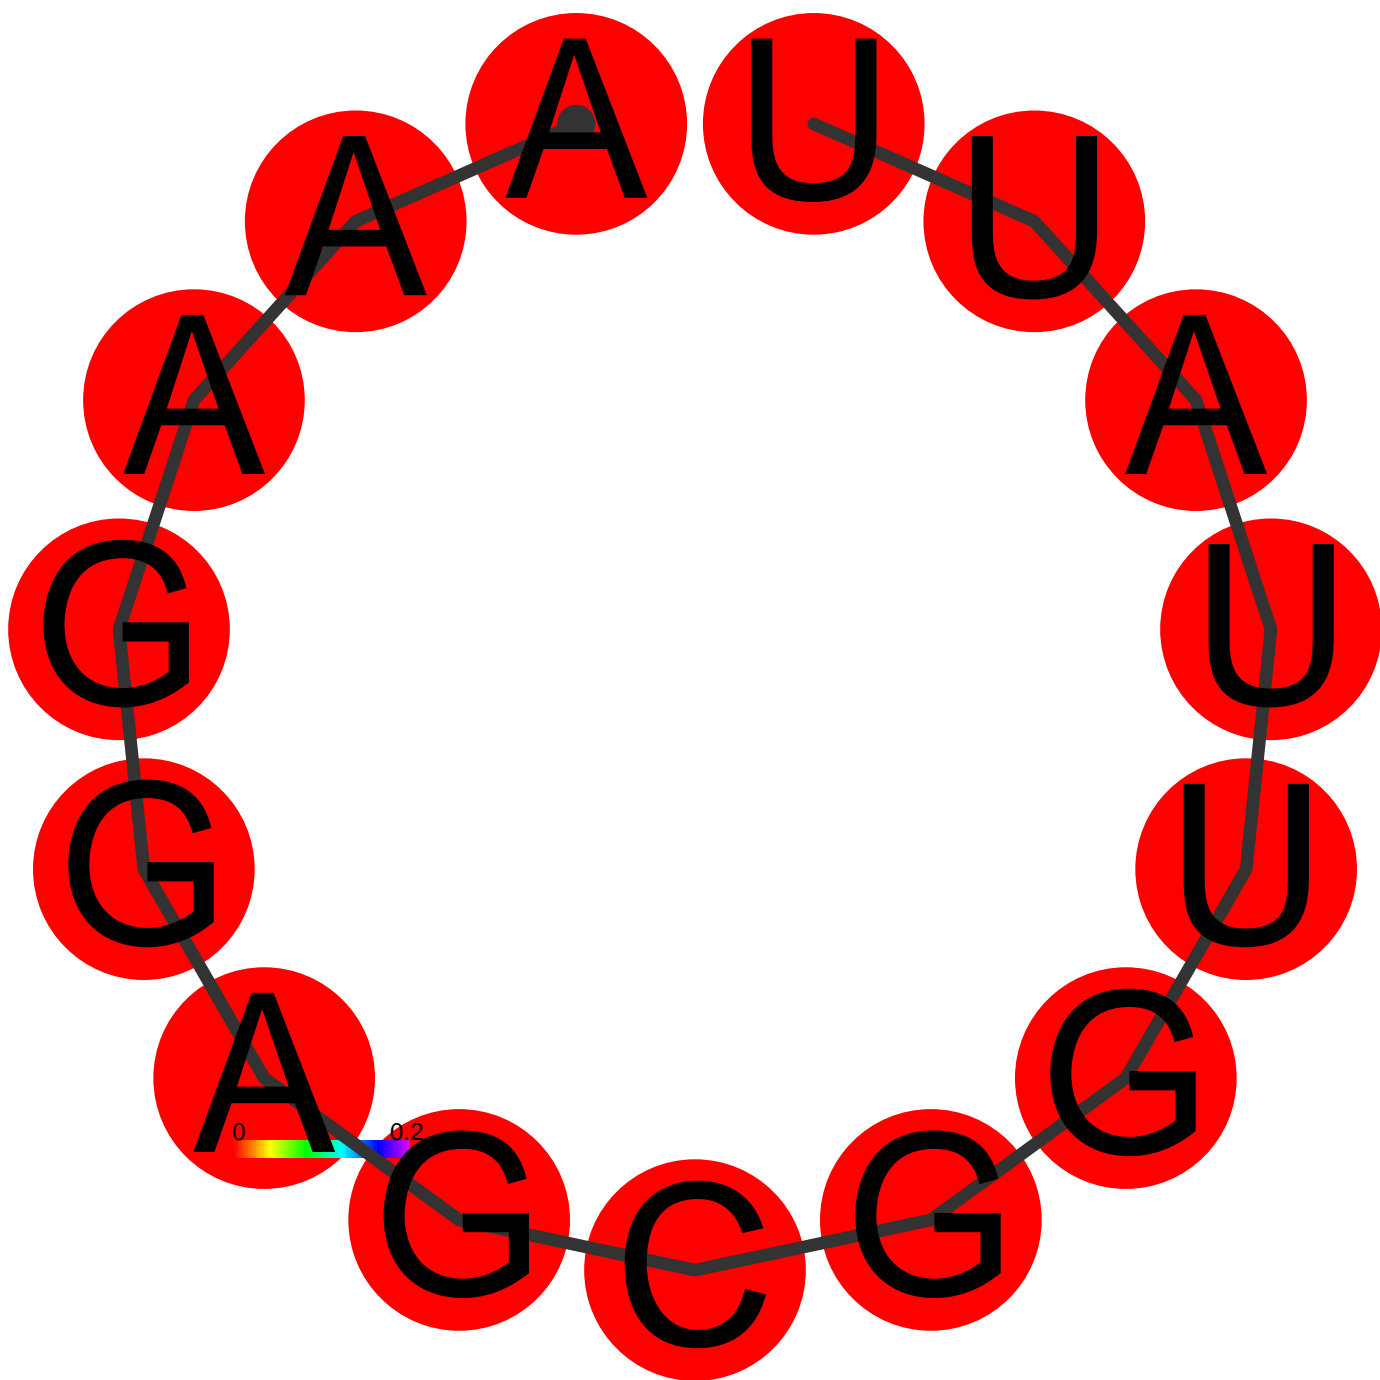

Supplement: Supplementary file 509 [file supplementary]

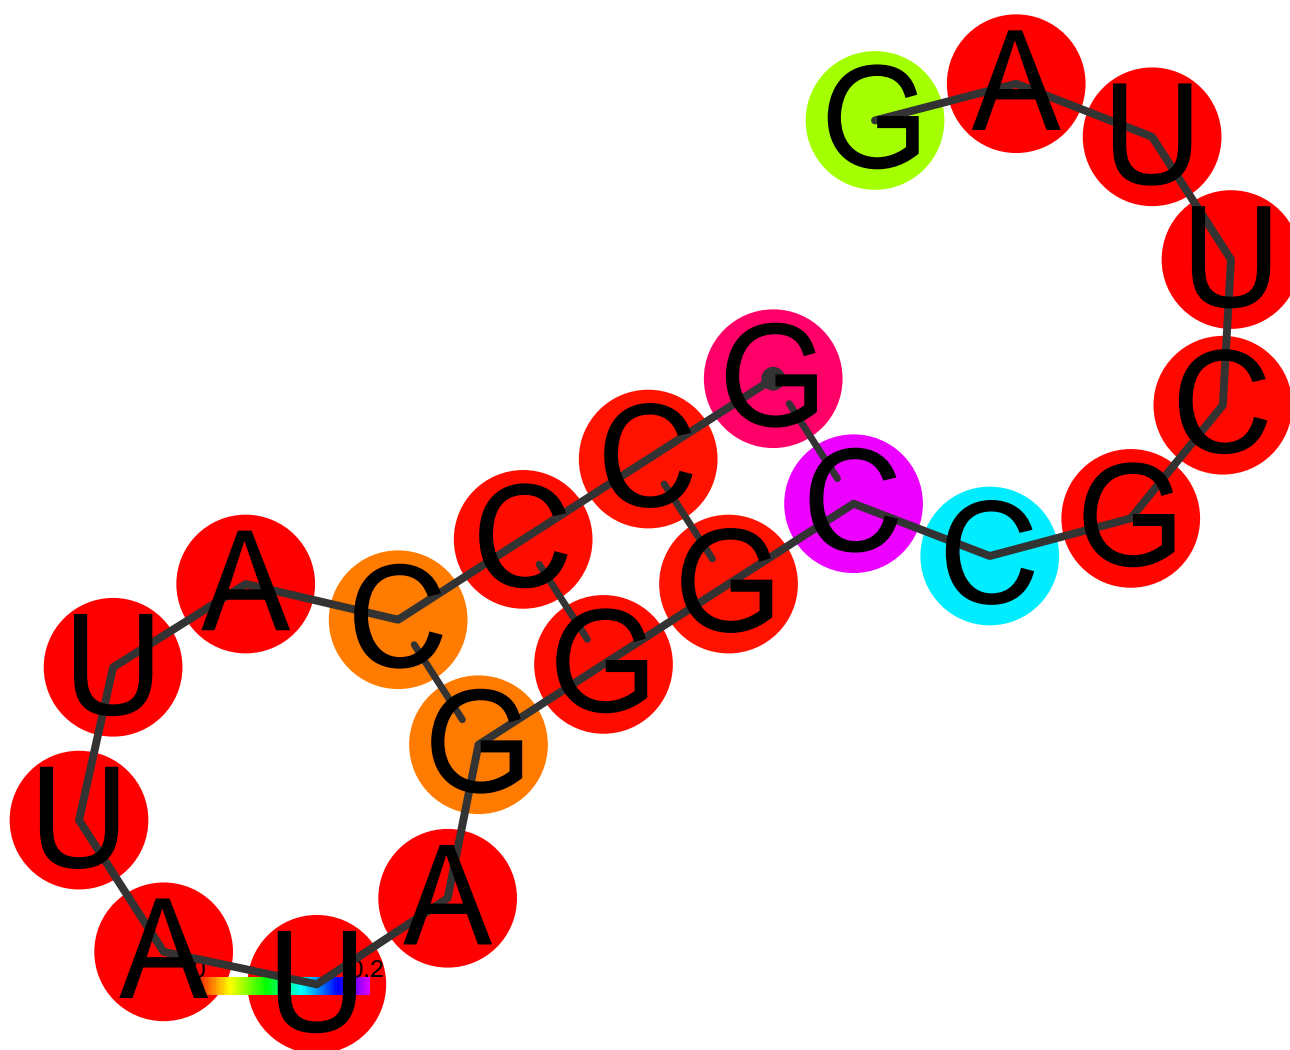

Supplement: Supplementary file 510 [file supplementary]

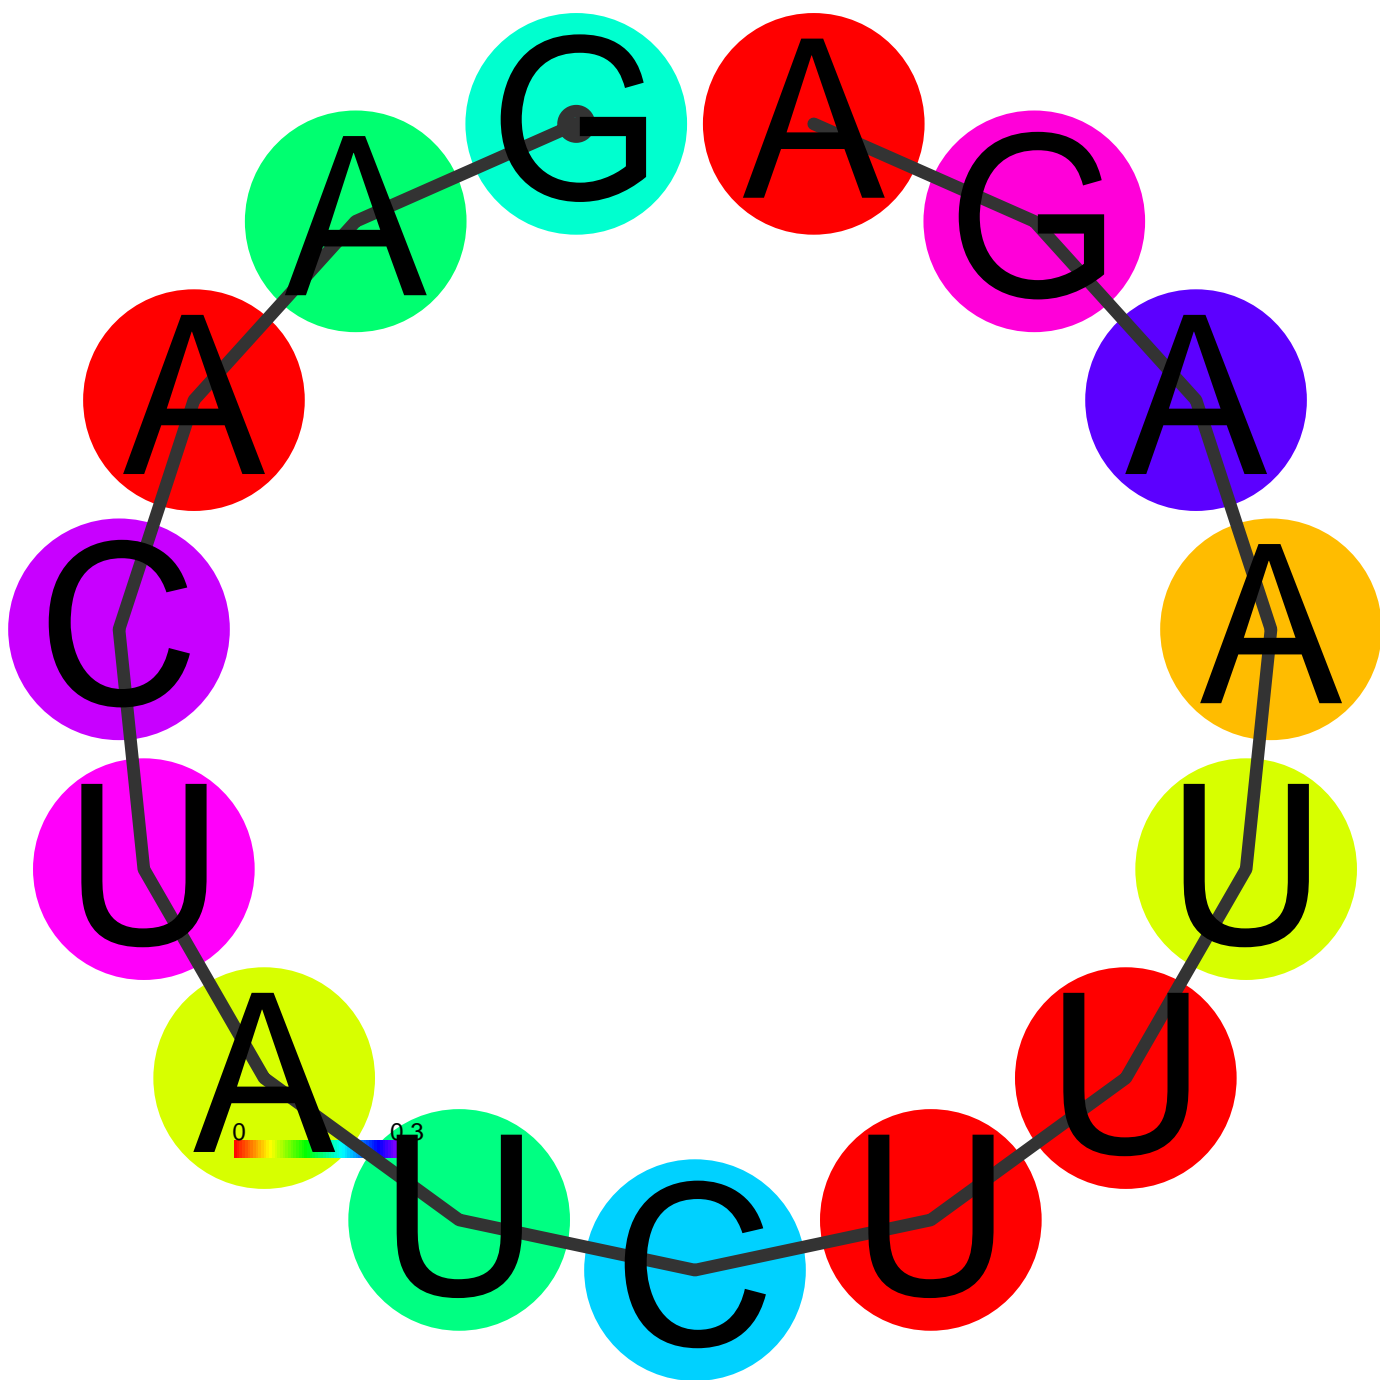

Supplement: Supplementary file 511 [file supplementary]

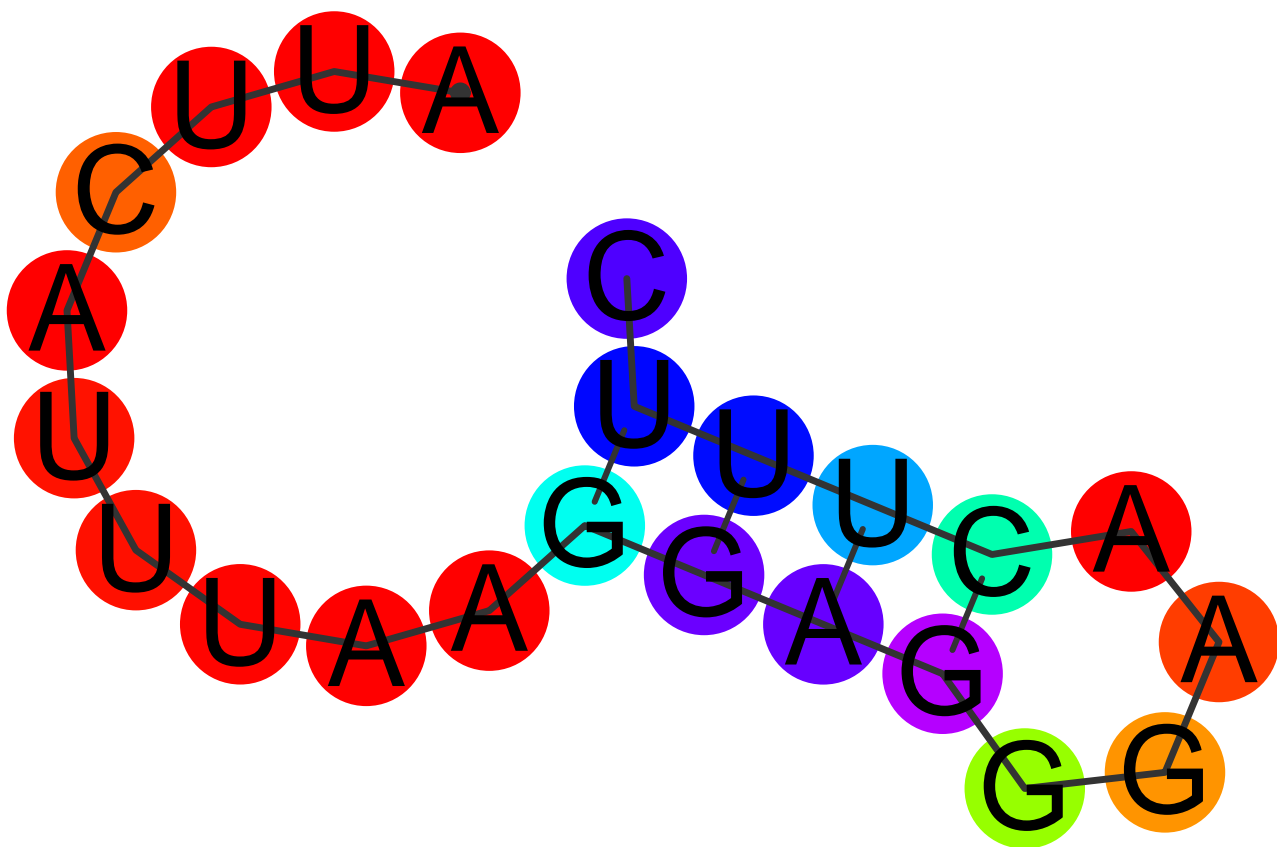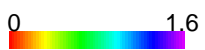

Supplement: Supplementary file 512 [file supplementary]

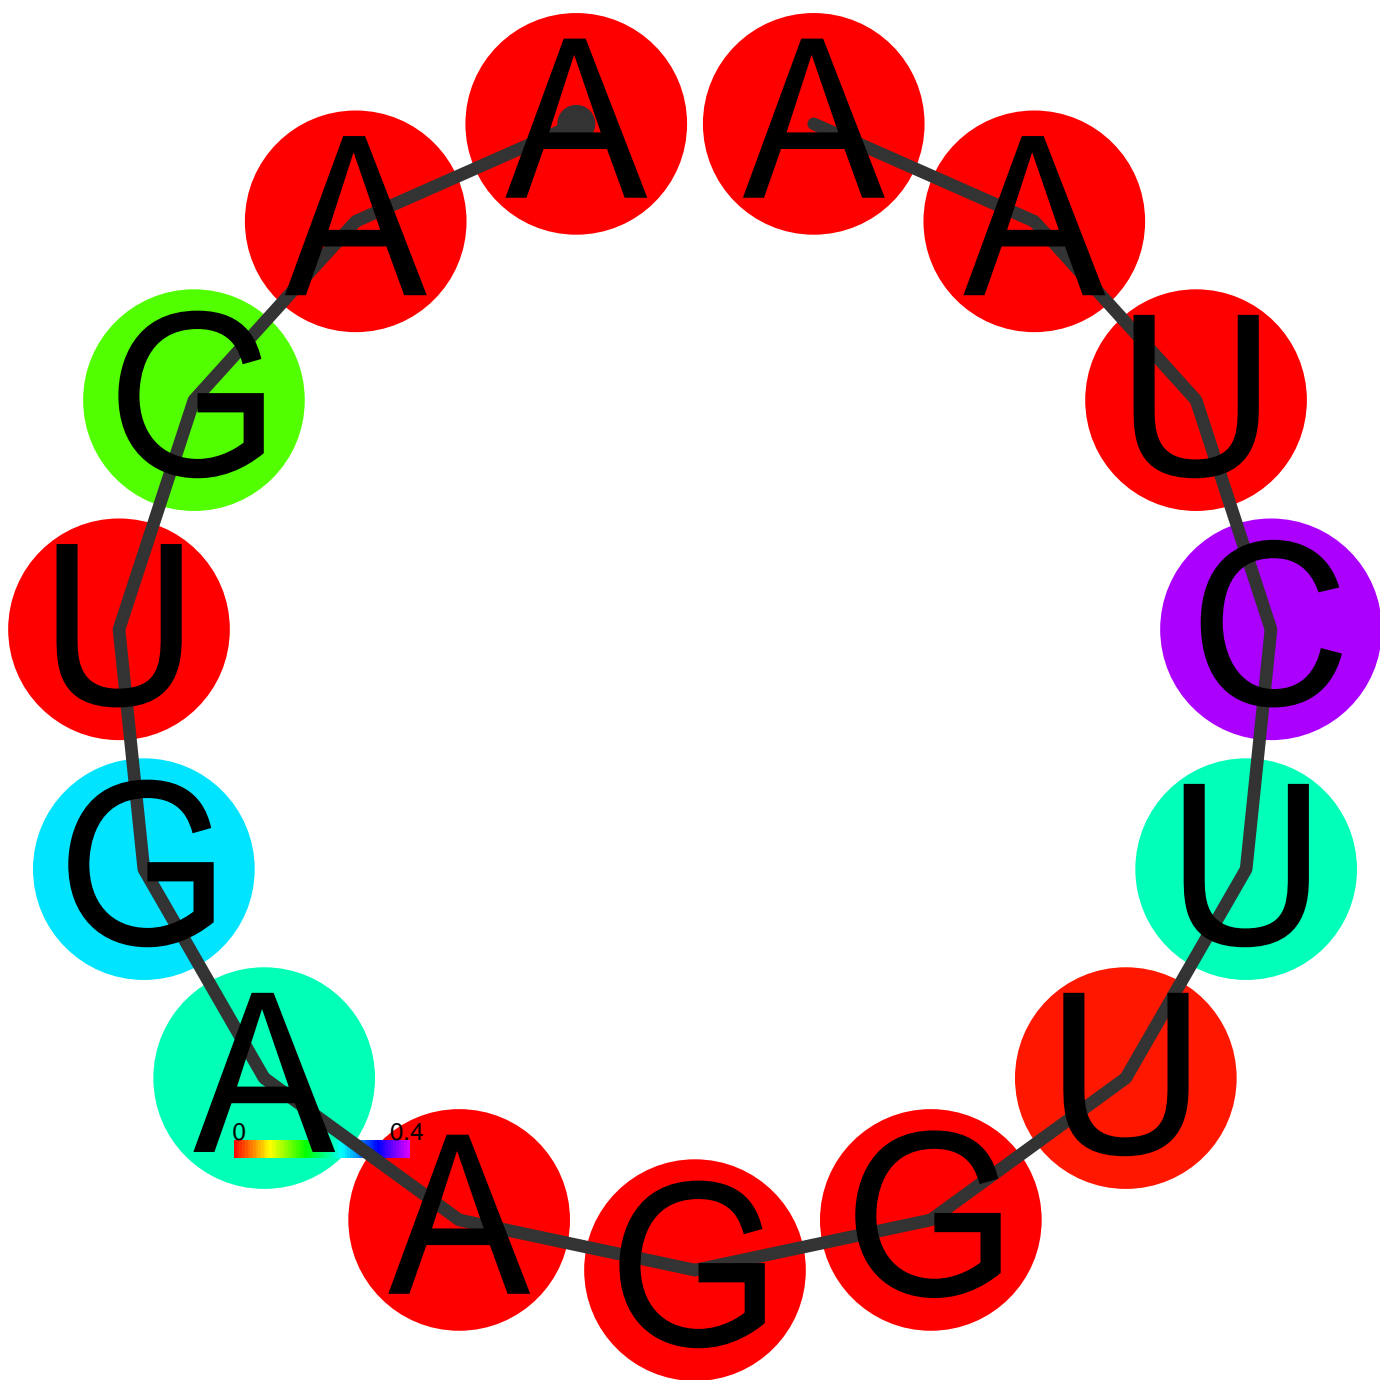

Supplement: Supplementary file 513 [file supplementary]

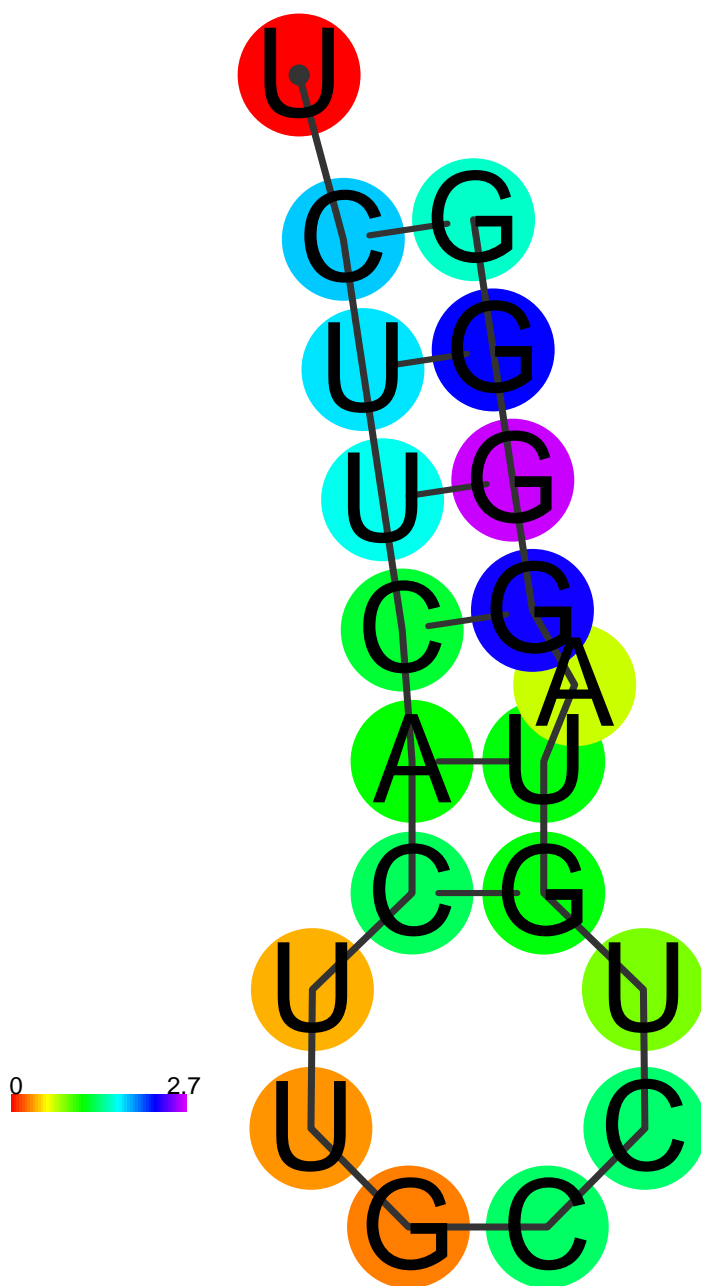

Supplement: Supplementary file 514 [file supplementary]

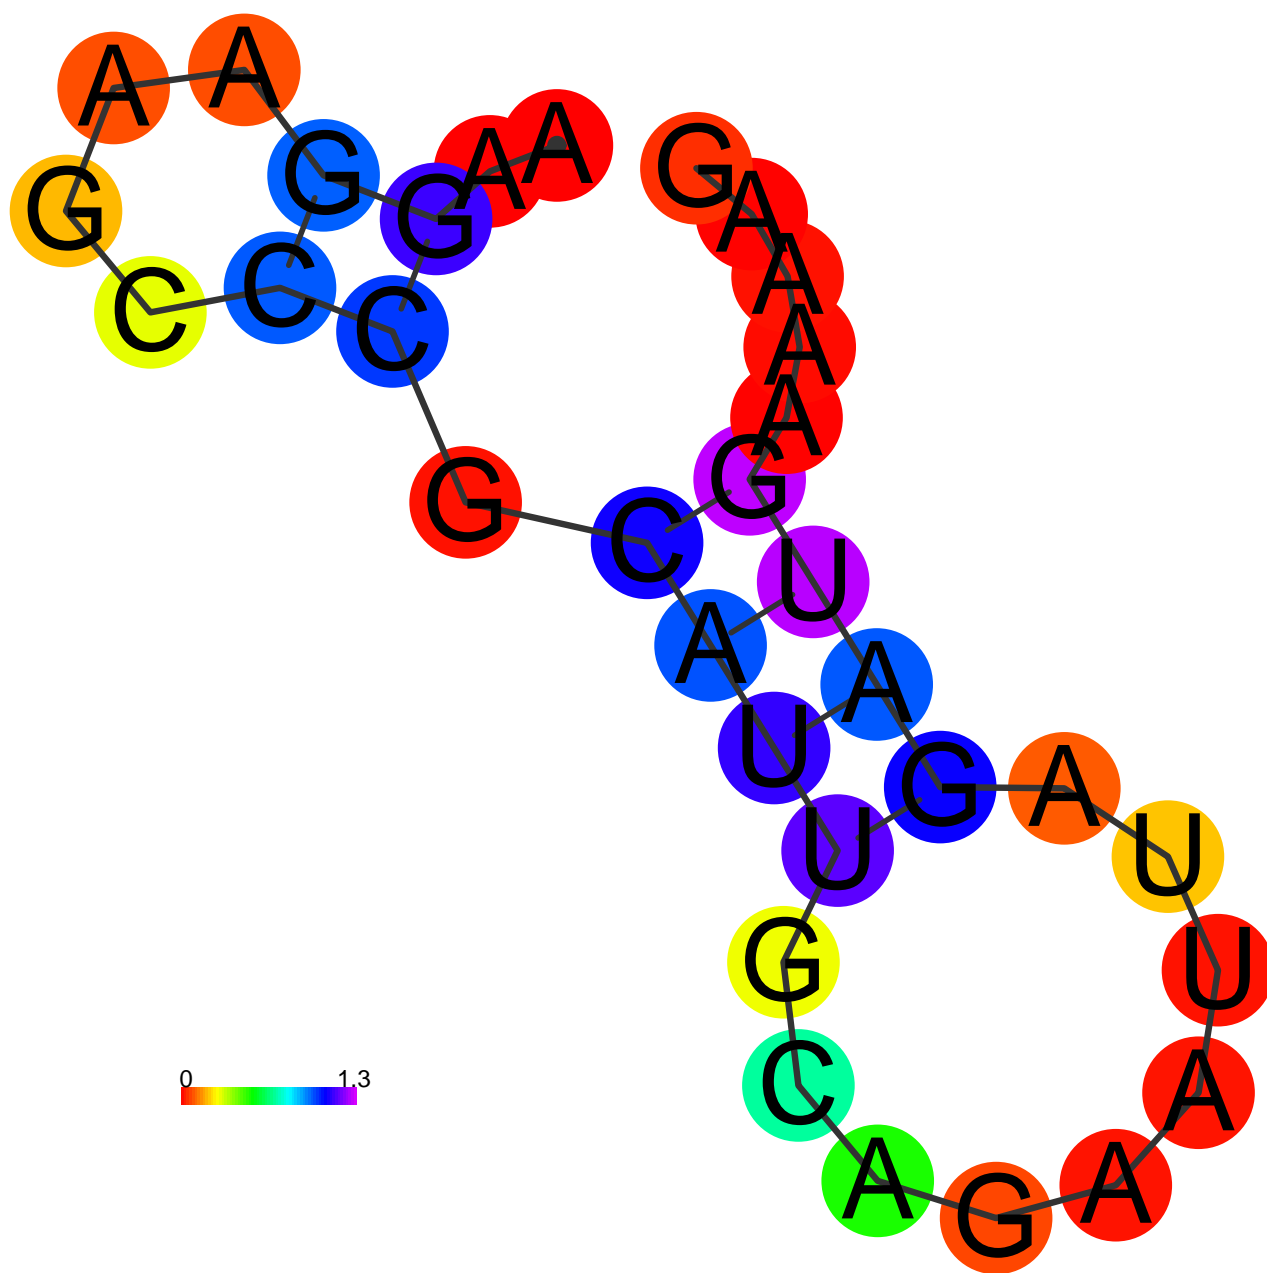

Supplement: Supplementary file 515 [file supplementary]

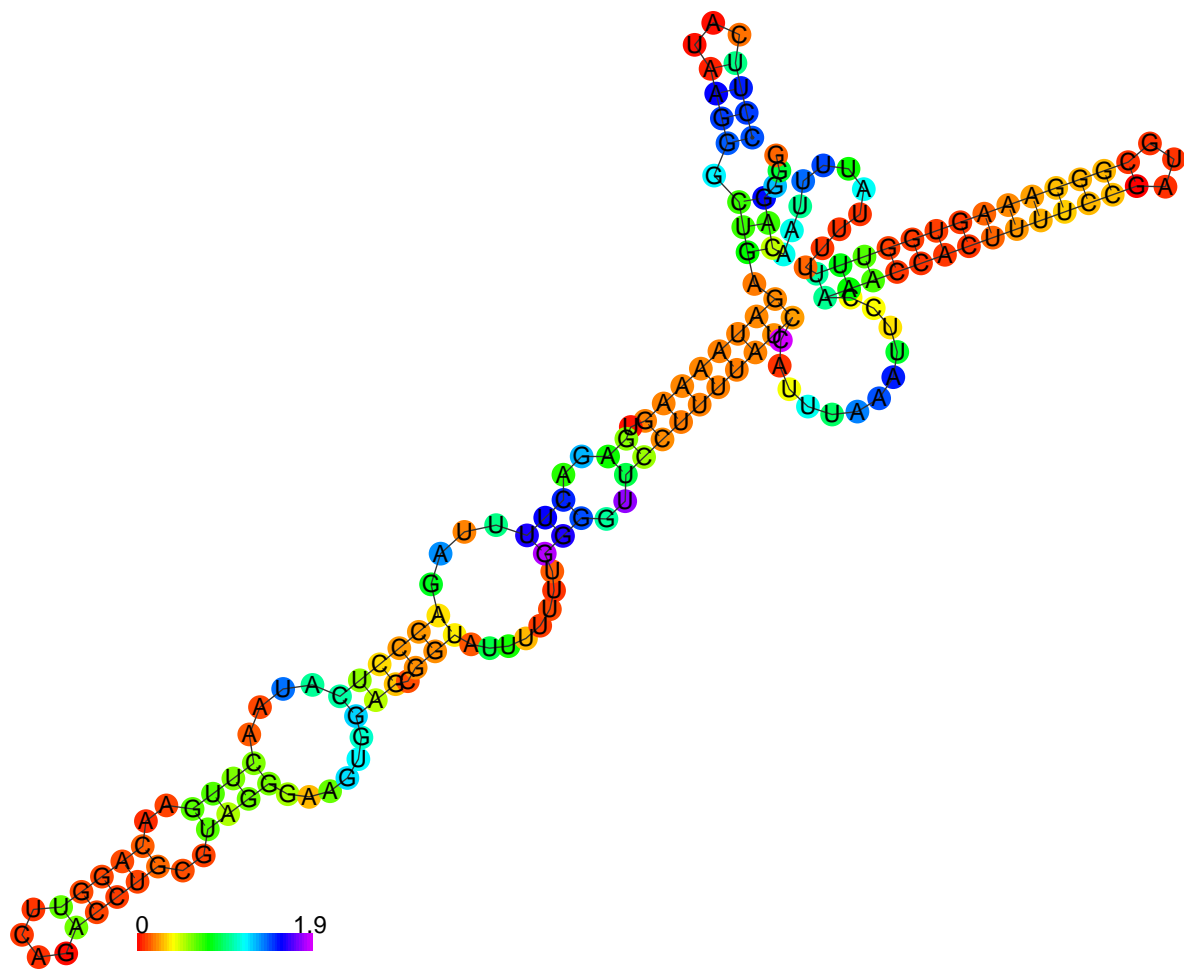

Supplement: Supplementary file 516 [file supplementary]

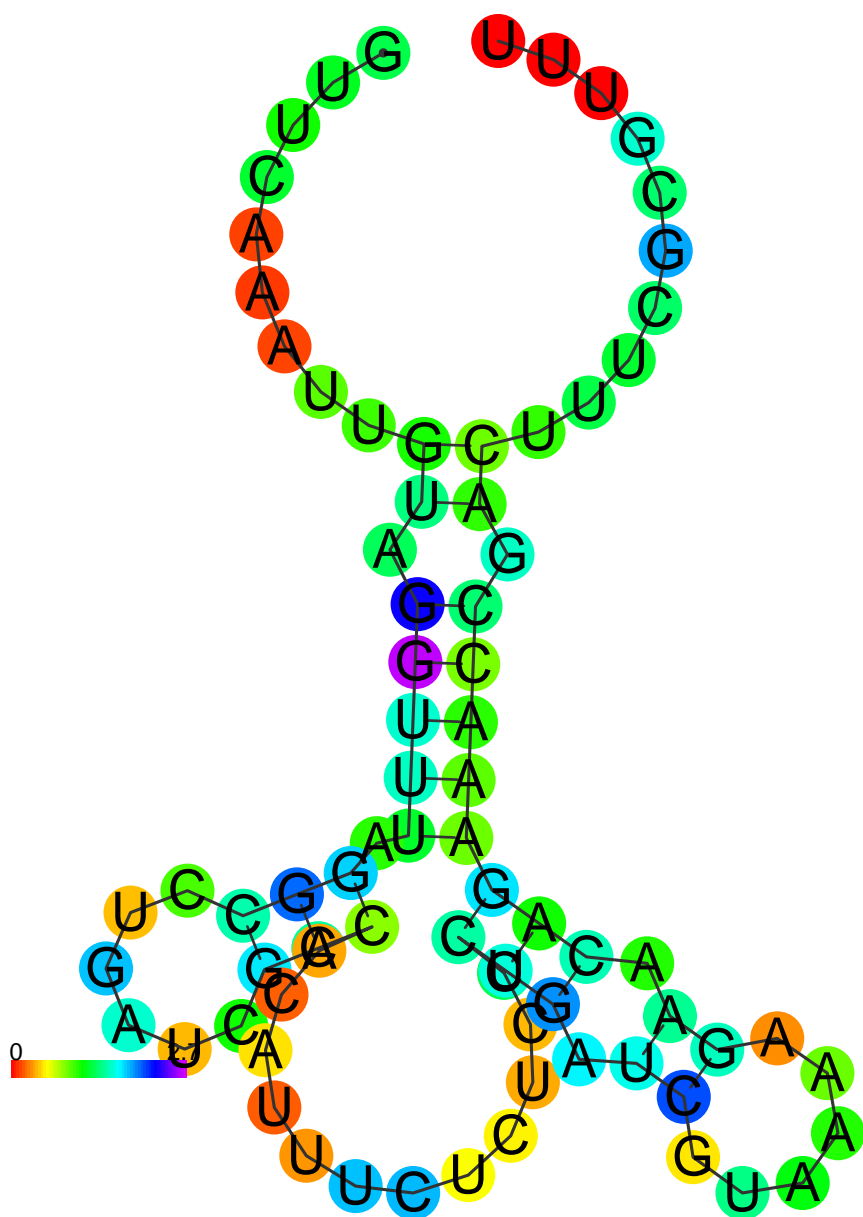

Supplement: Supplementary file 517 [file supplementary]

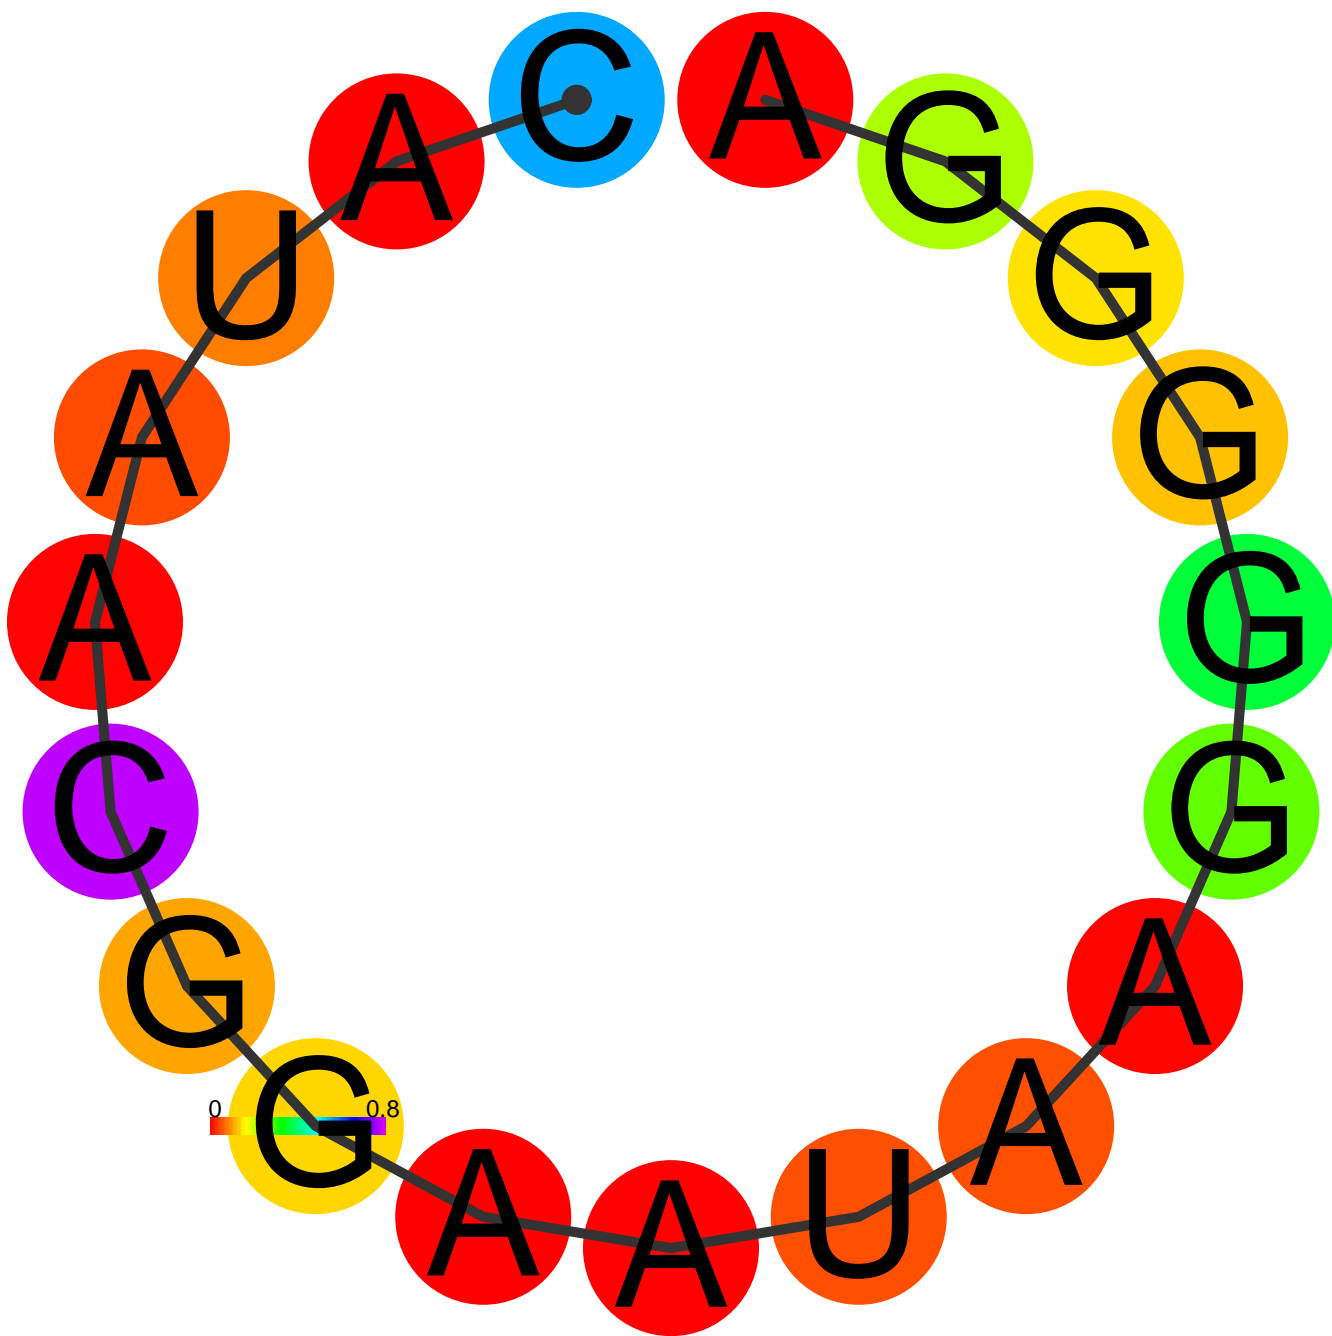

Supplement: Supplementary file 518 [file supplementary]

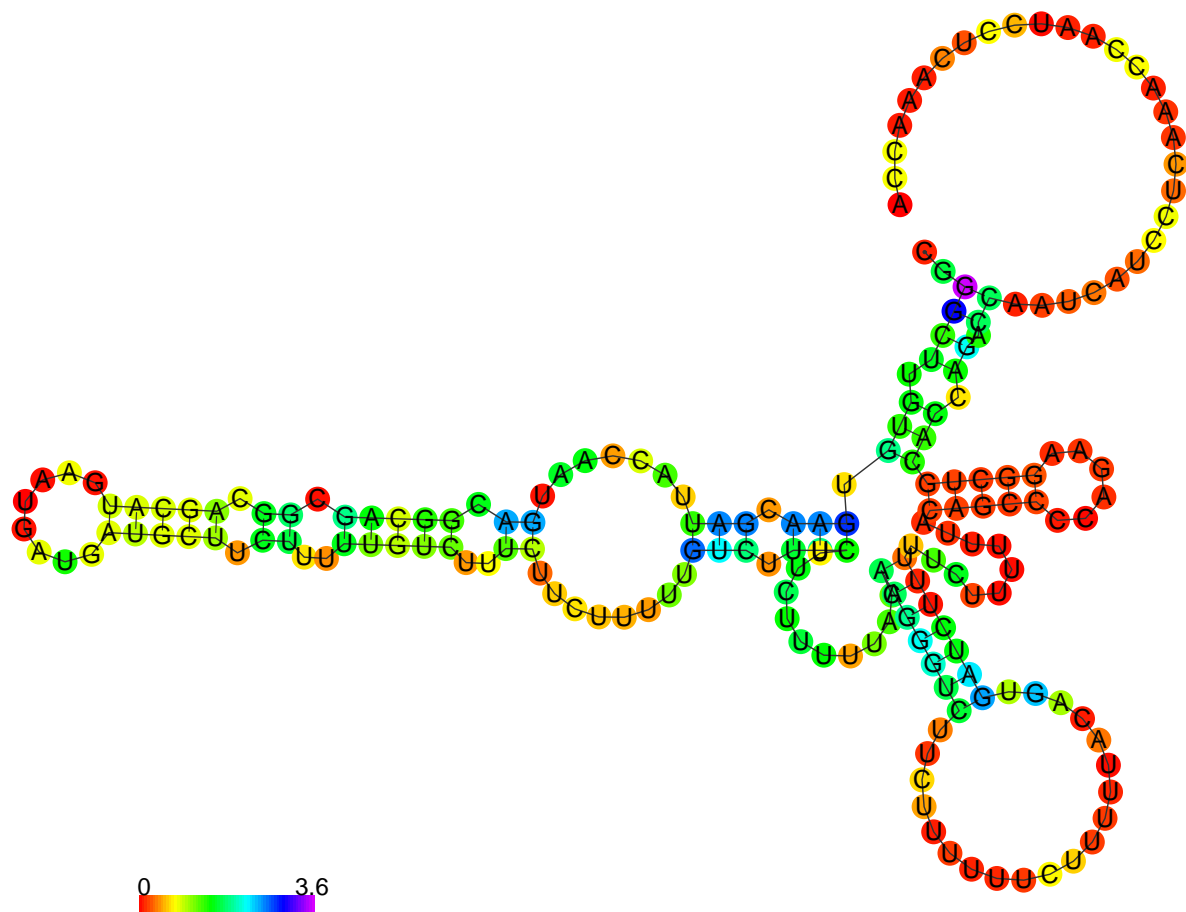

Supplement: Supplementary file 519 [file supplementary]

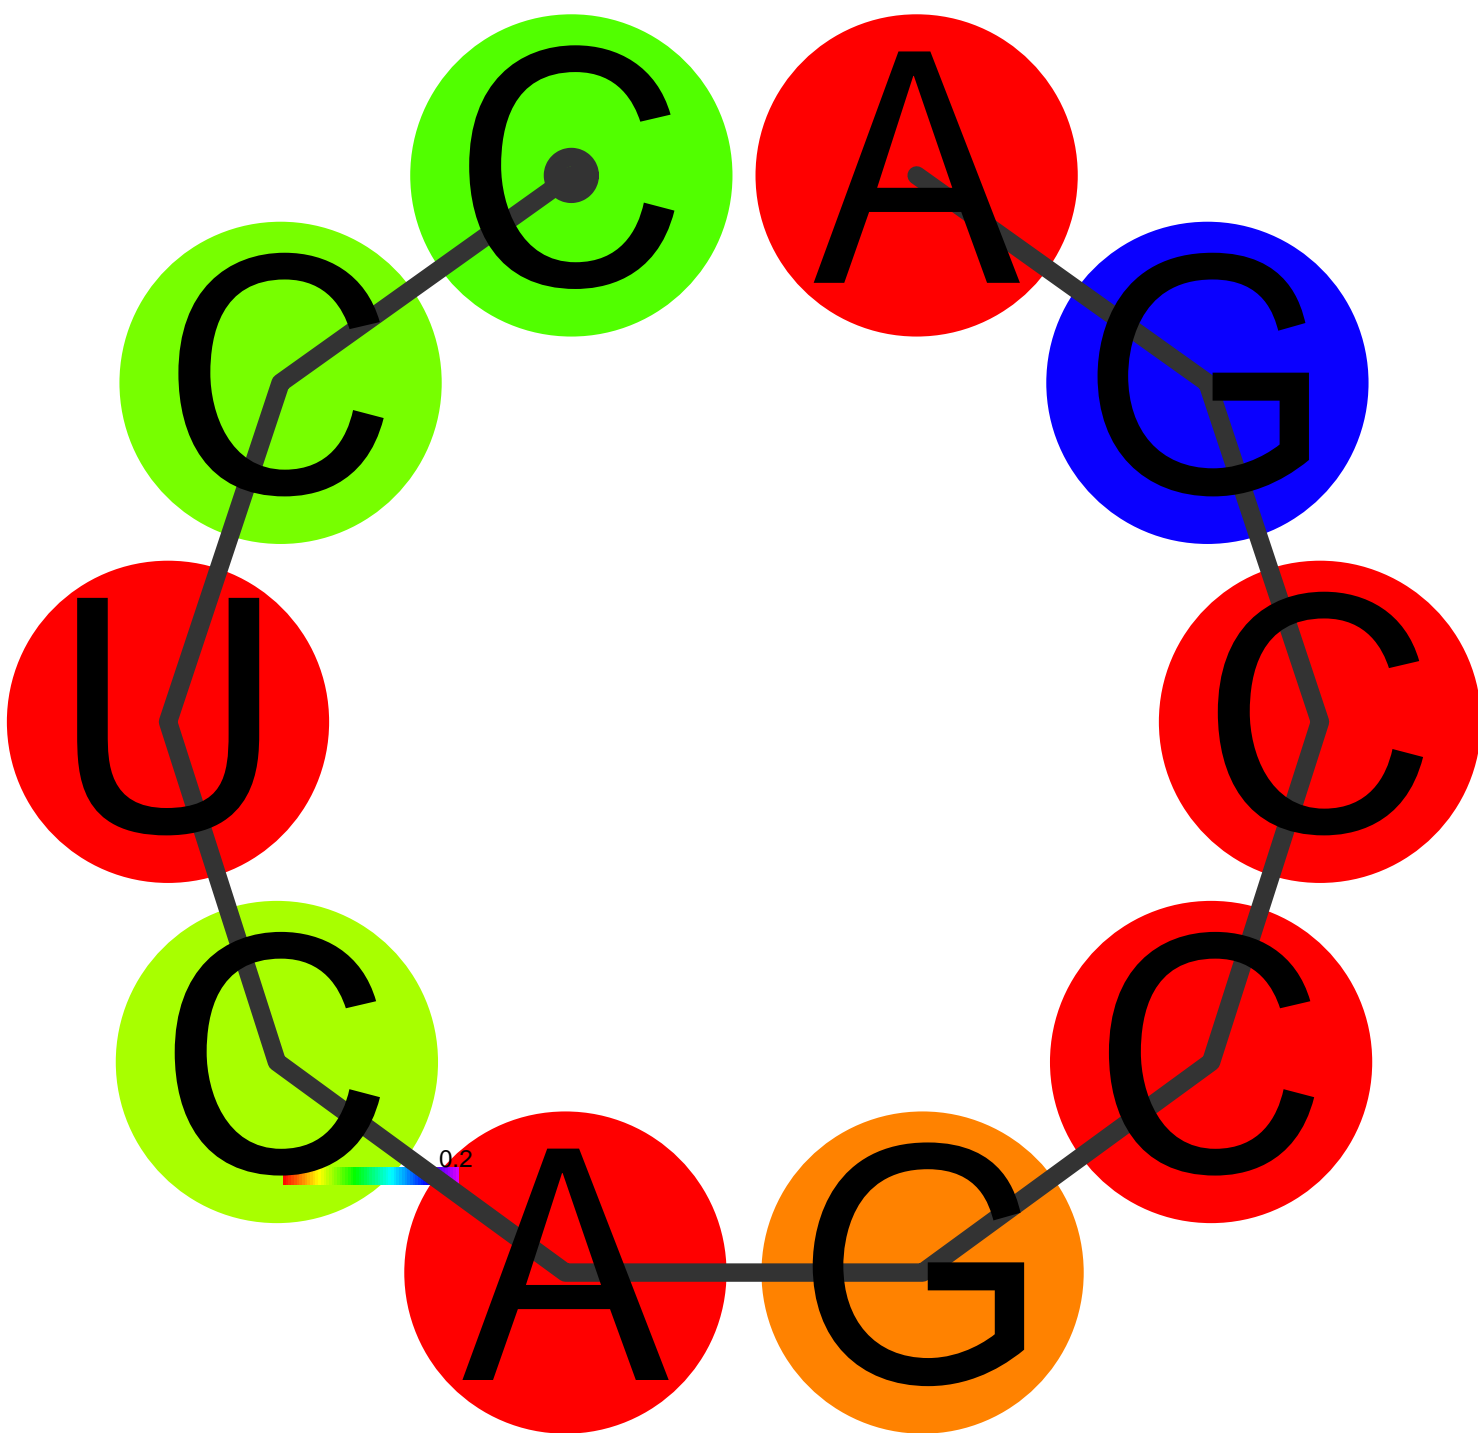

Supplement: Supplementary file 520 [file supplementary]

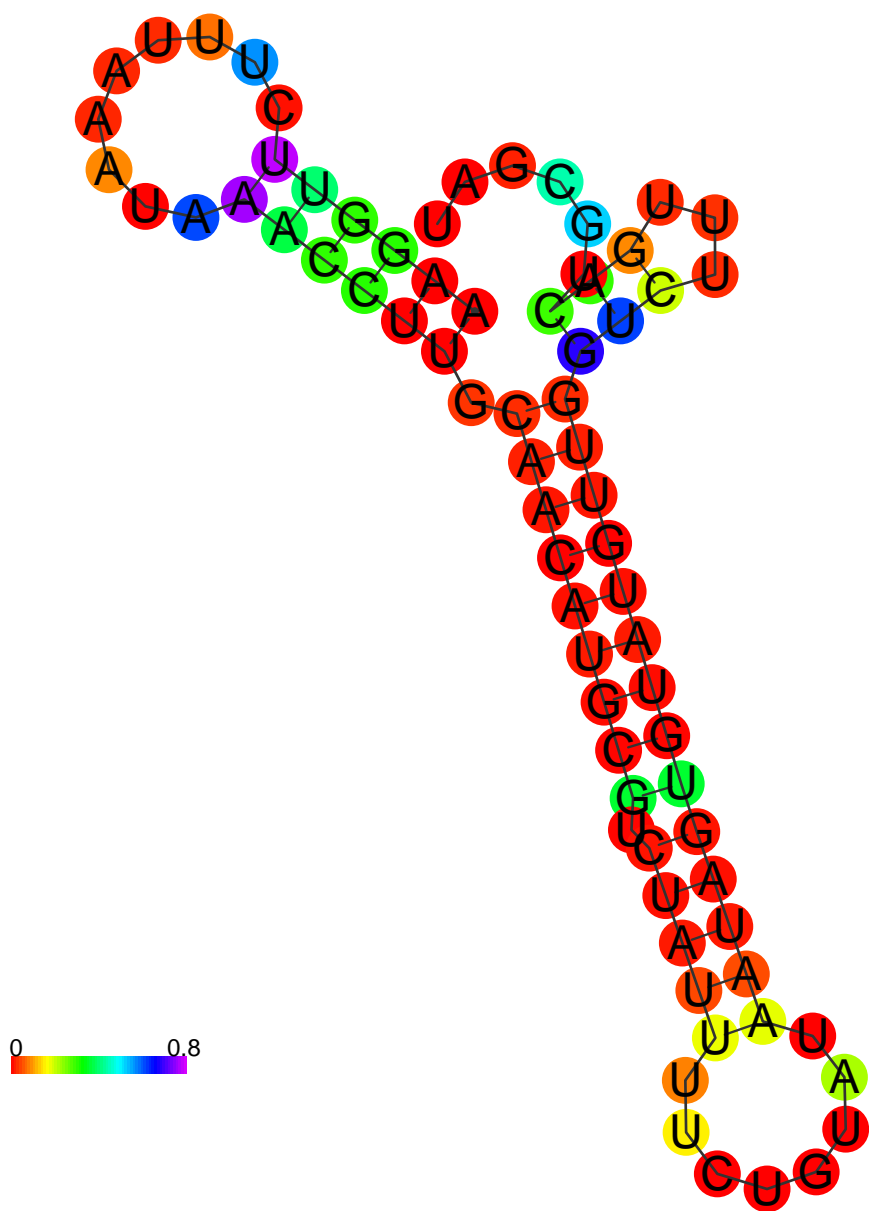

Supplement: Supplementary file 521 [file supplementary]

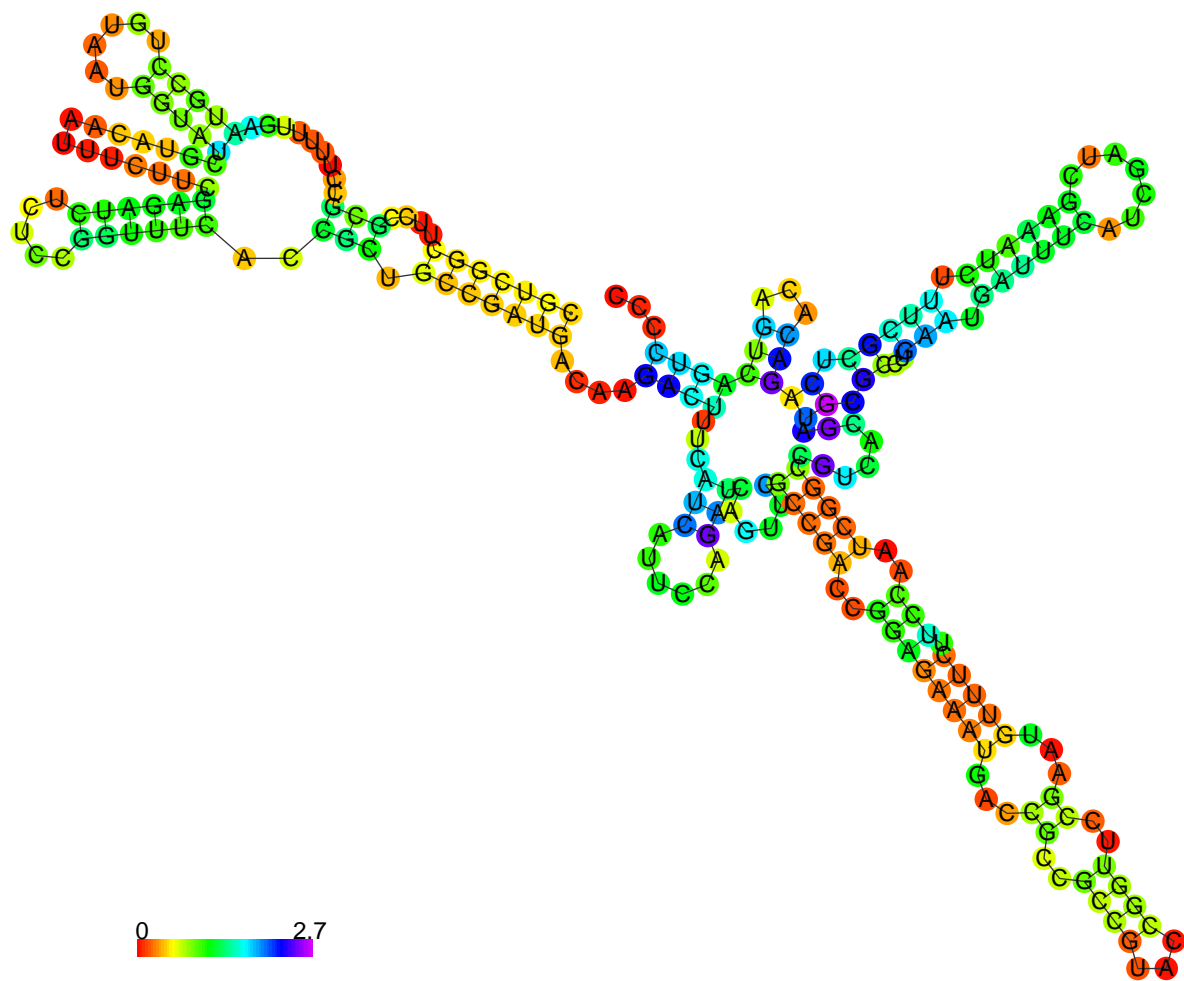

Supplement: Supplementary file 522 [file supplementary]

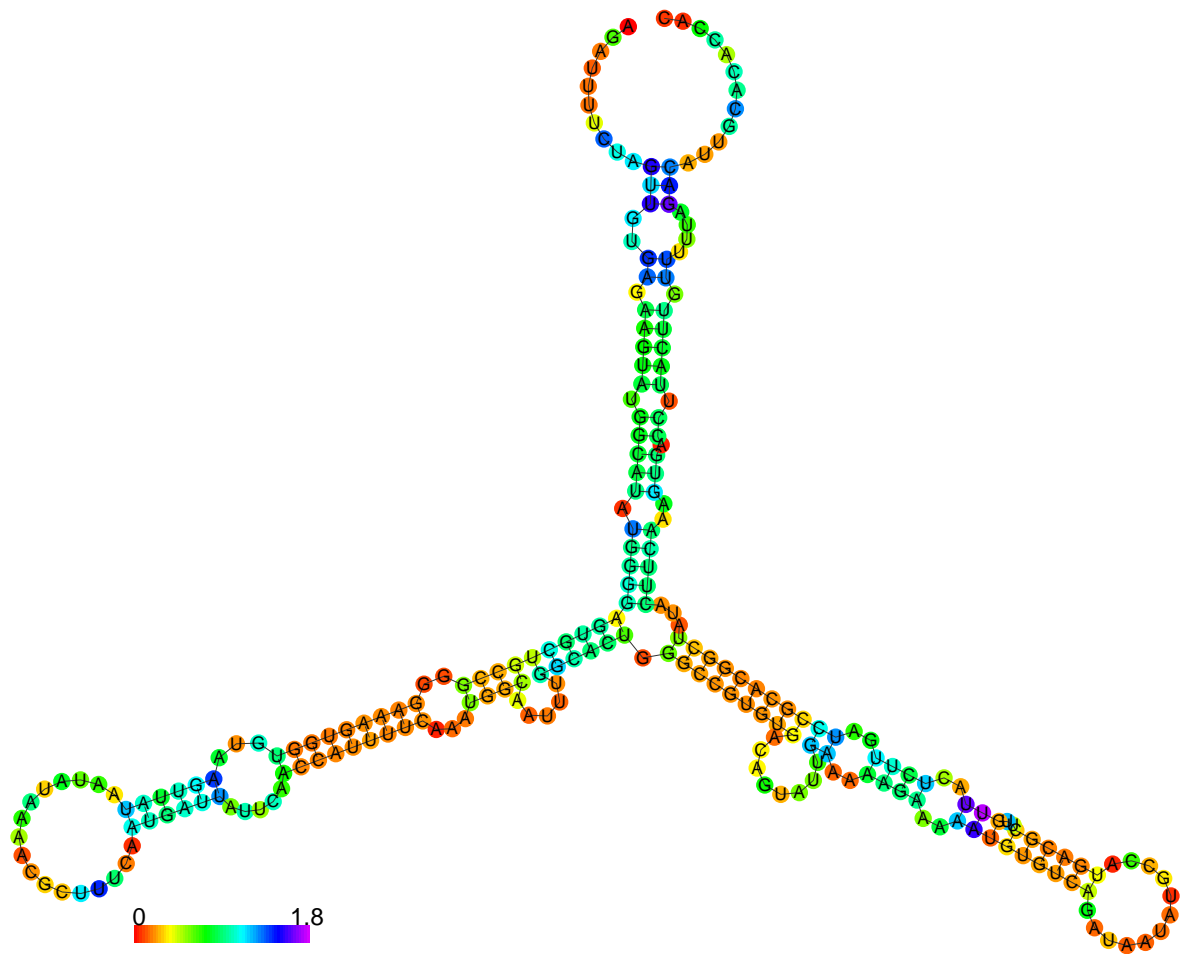

Supplement: Supplementary file 523 [file supplementary]

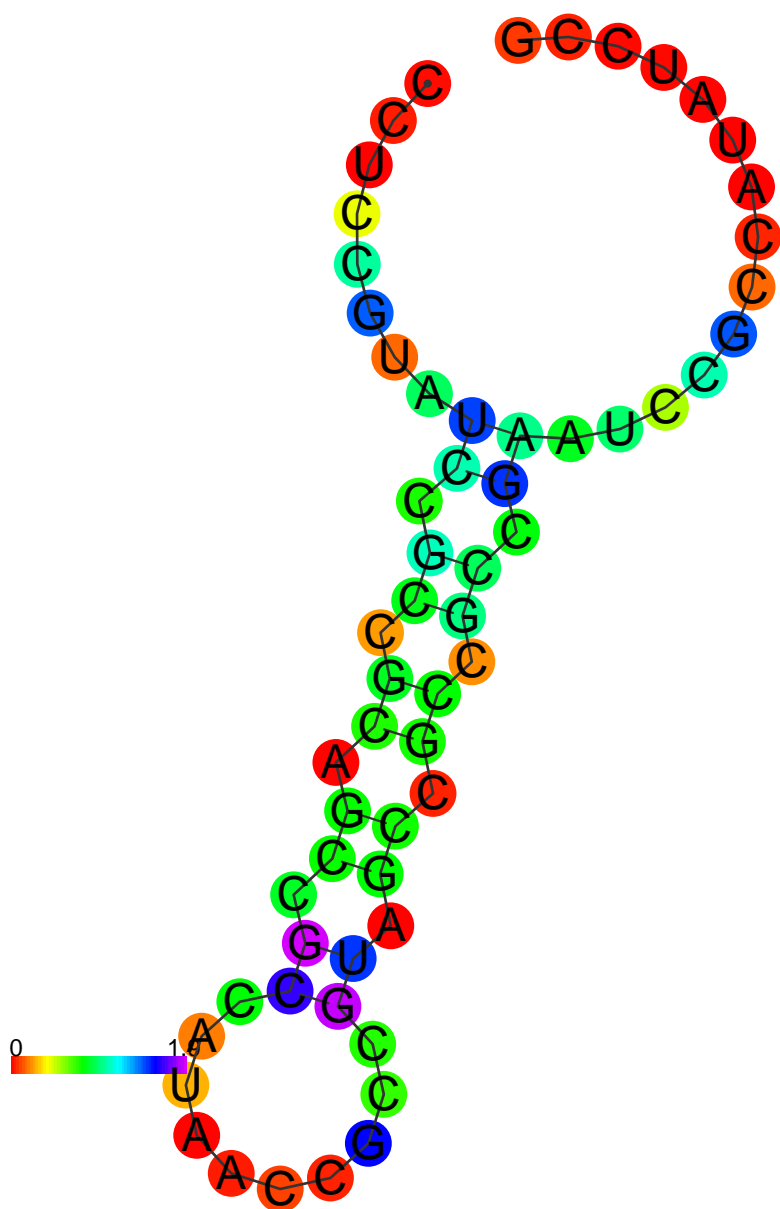

Supplement: Supplementary file 524 [file supplementary]

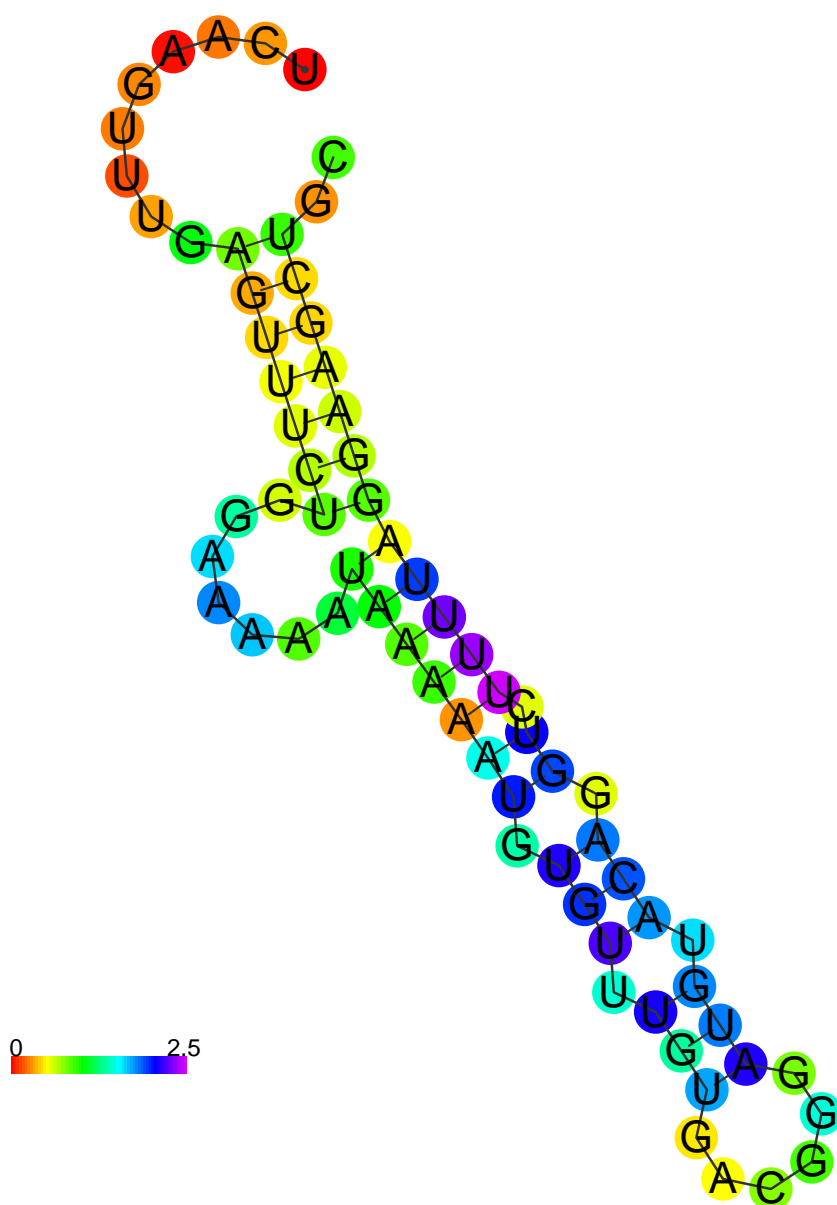

Supplement: Supplementary file 525 [file supplementary]

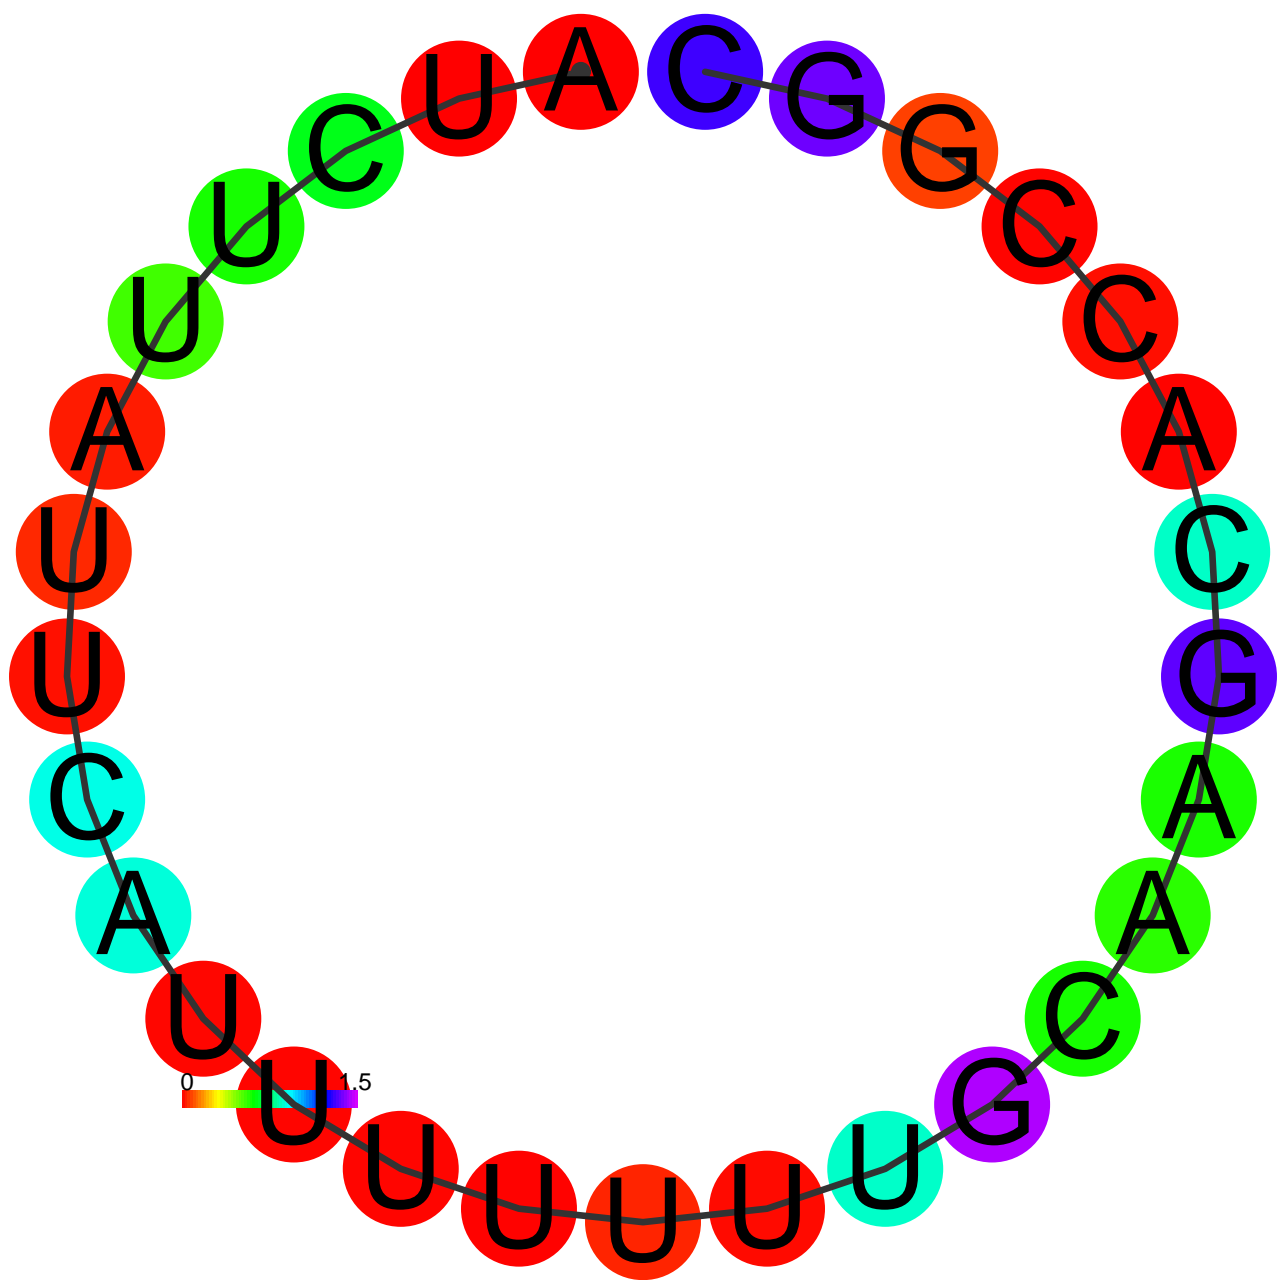

Supplement: Supplementary file 526 [file supplementary]

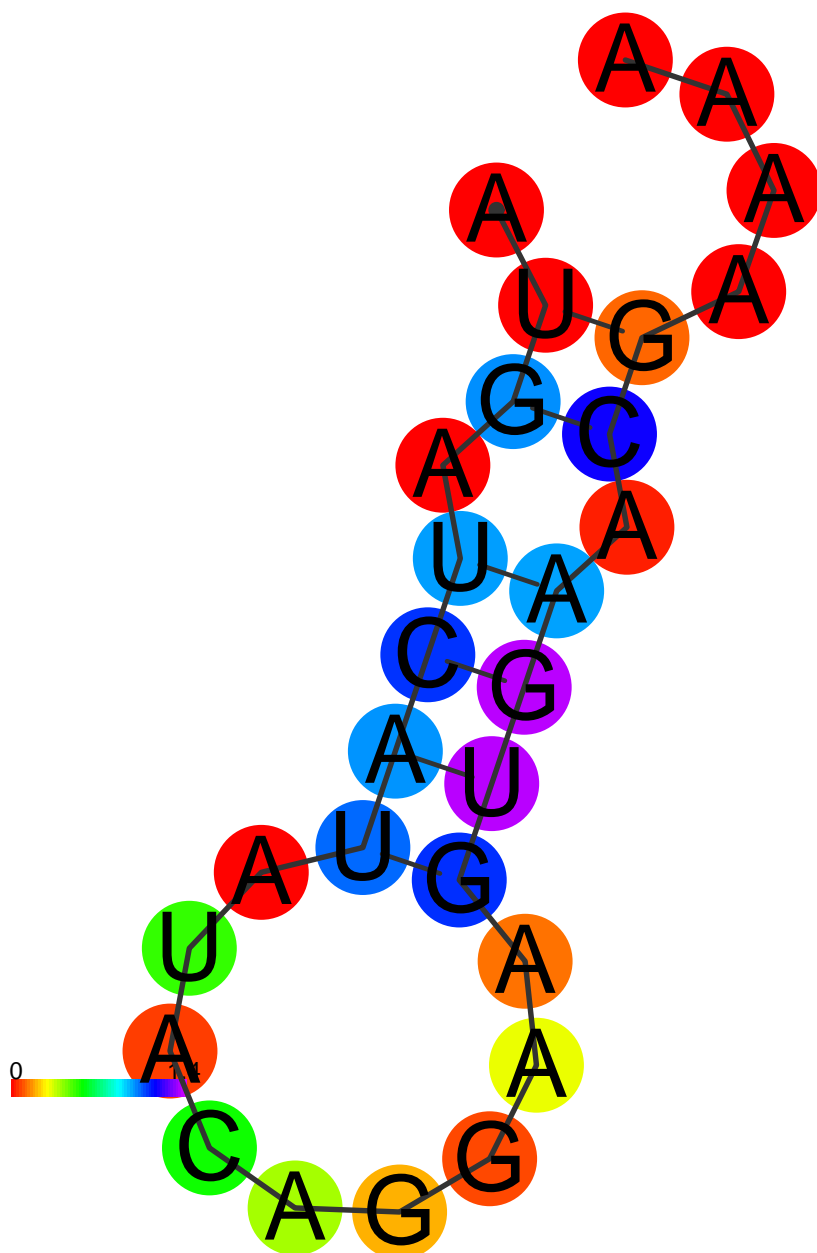

Supplement: Supplementary file 527 [file supplementary]

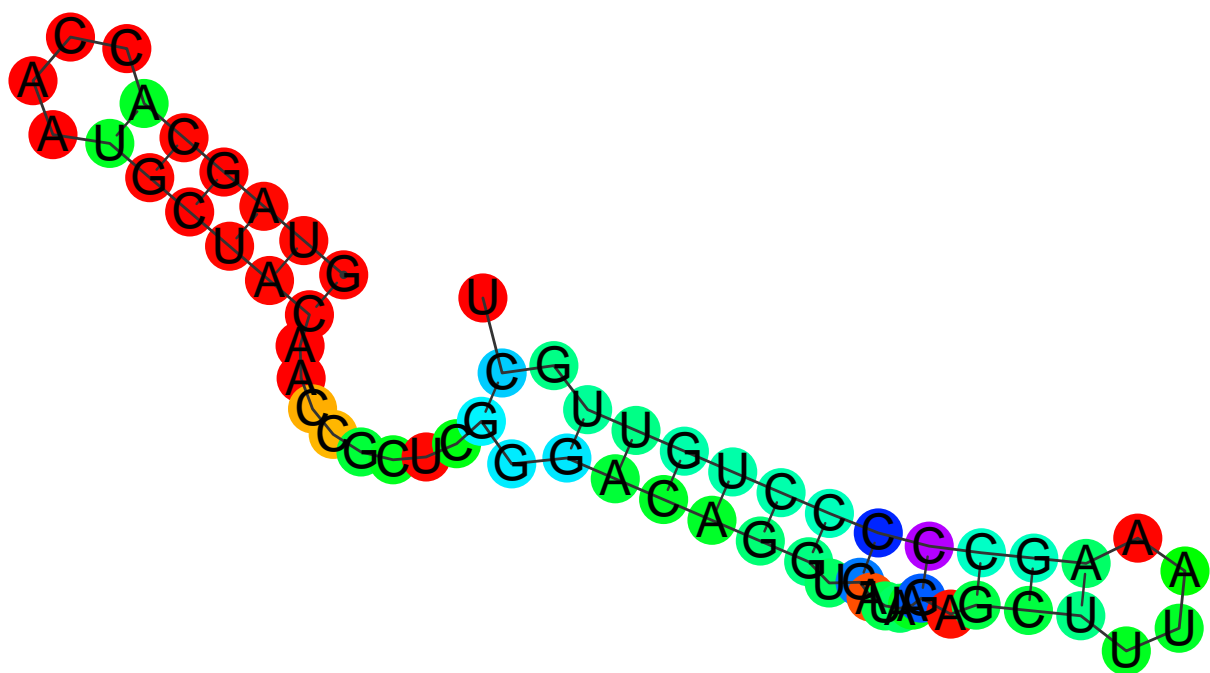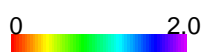

Supplement: Supplementary file 528 [file supplementary]

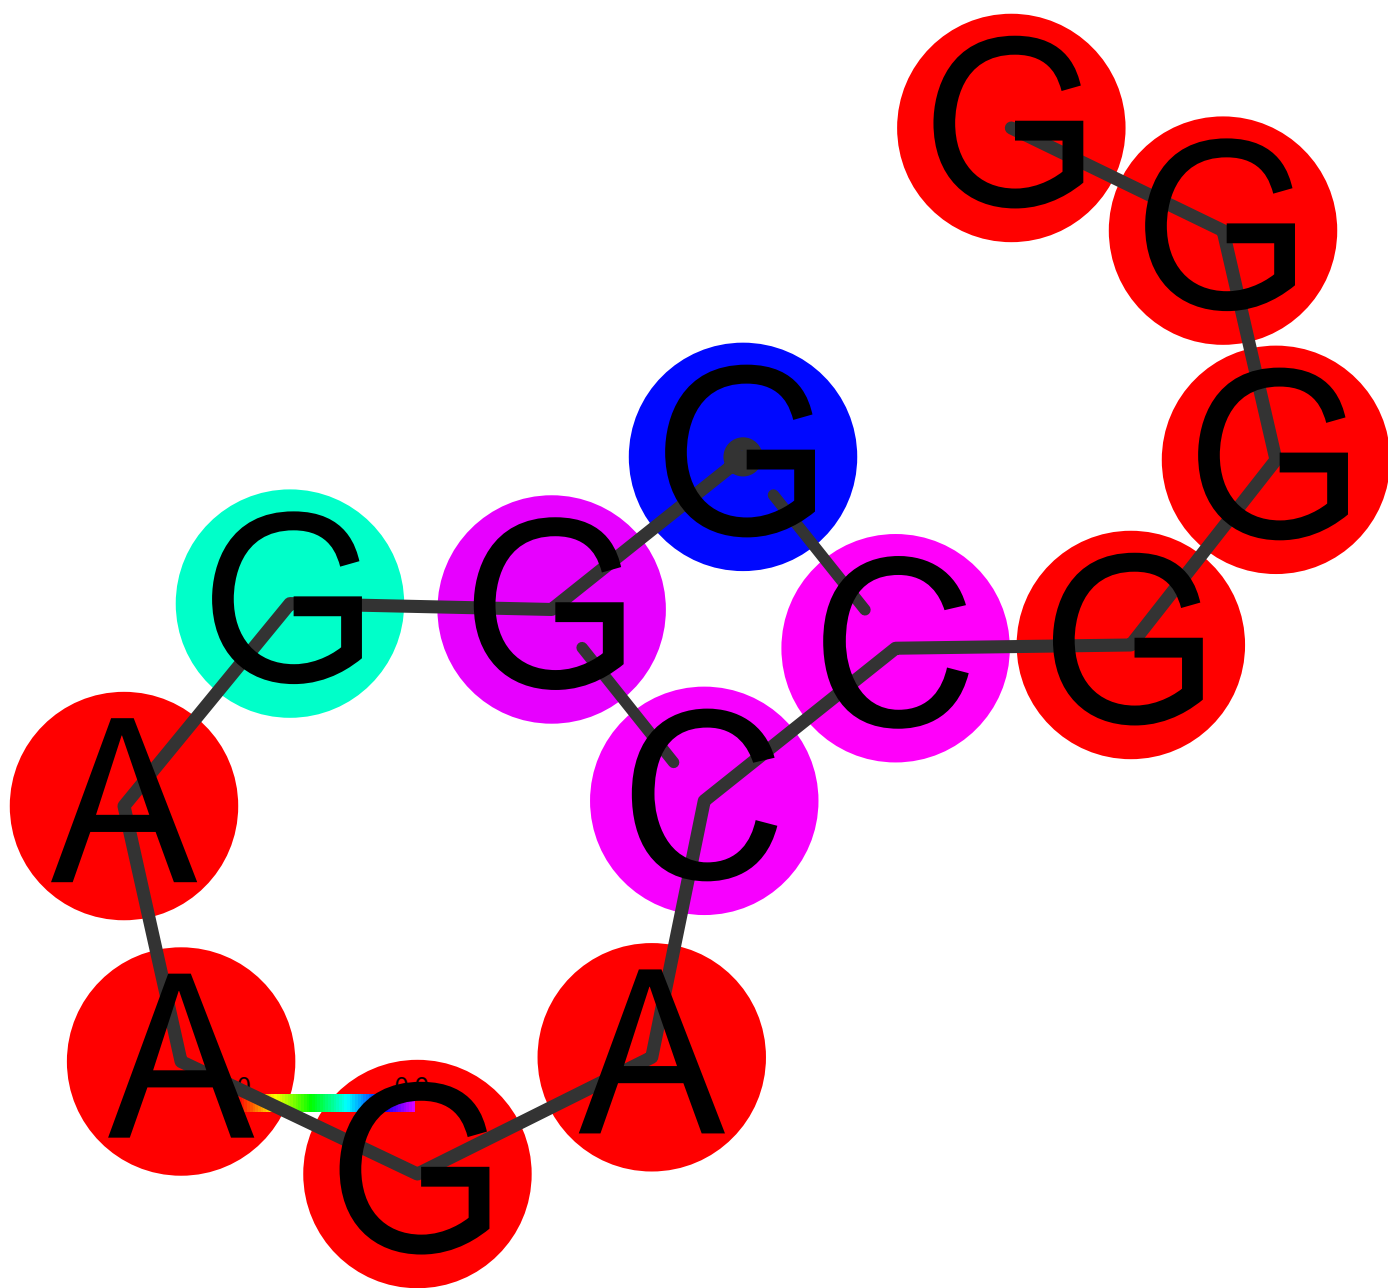

Supplement: Supplementary file 529 [file supplementary]

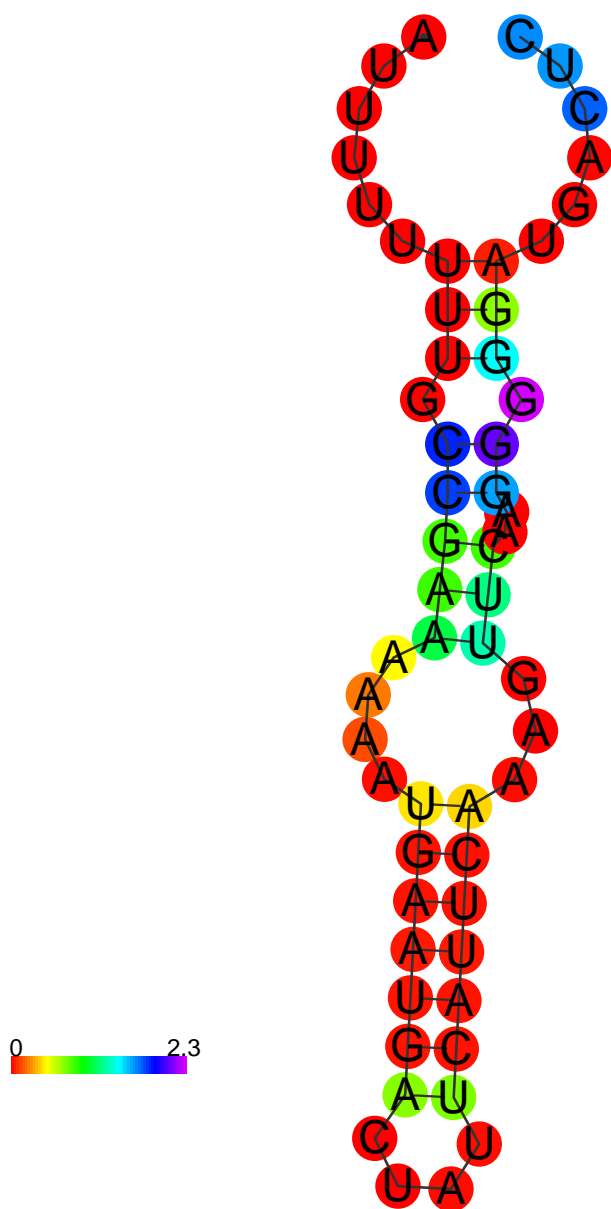

Supplement: Supplementary file 530 [file supplementary]

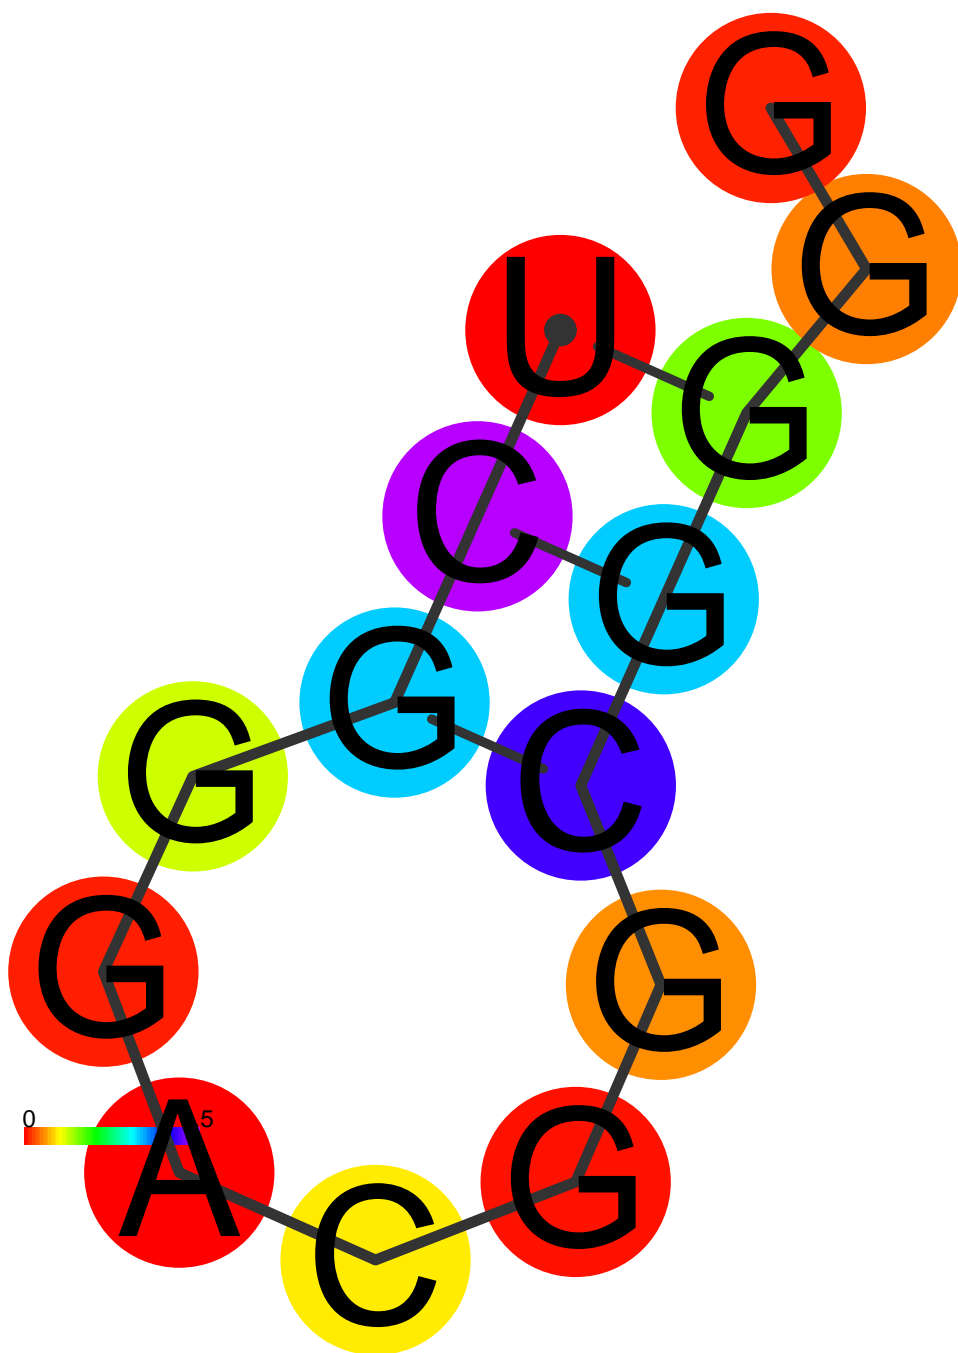

Supplement: Supplementary file 531 [file supplementary]

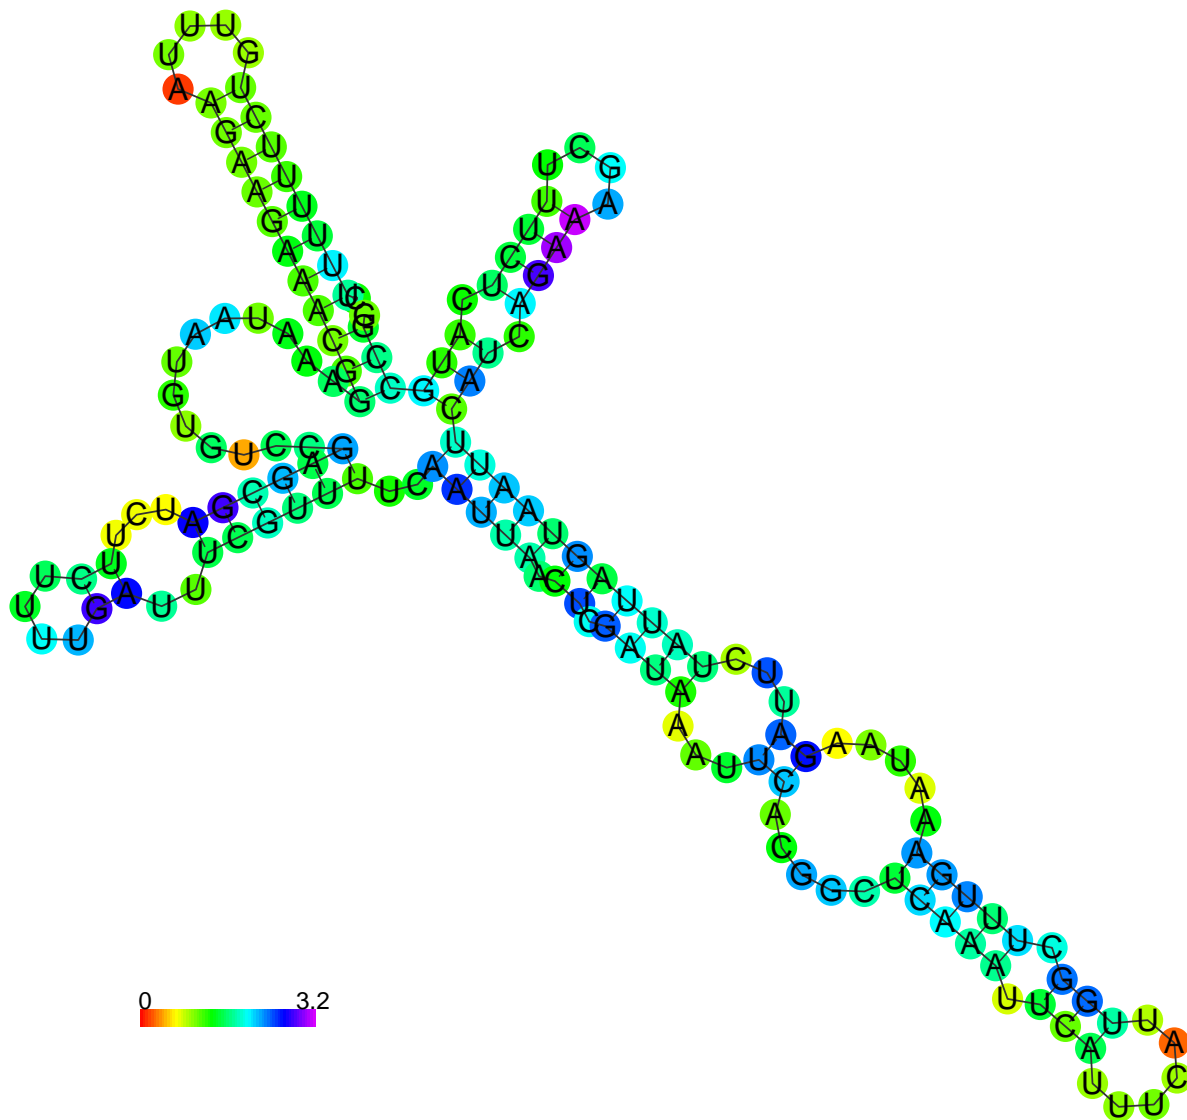

Supplement: Supplementary file 532 [file supplementary]

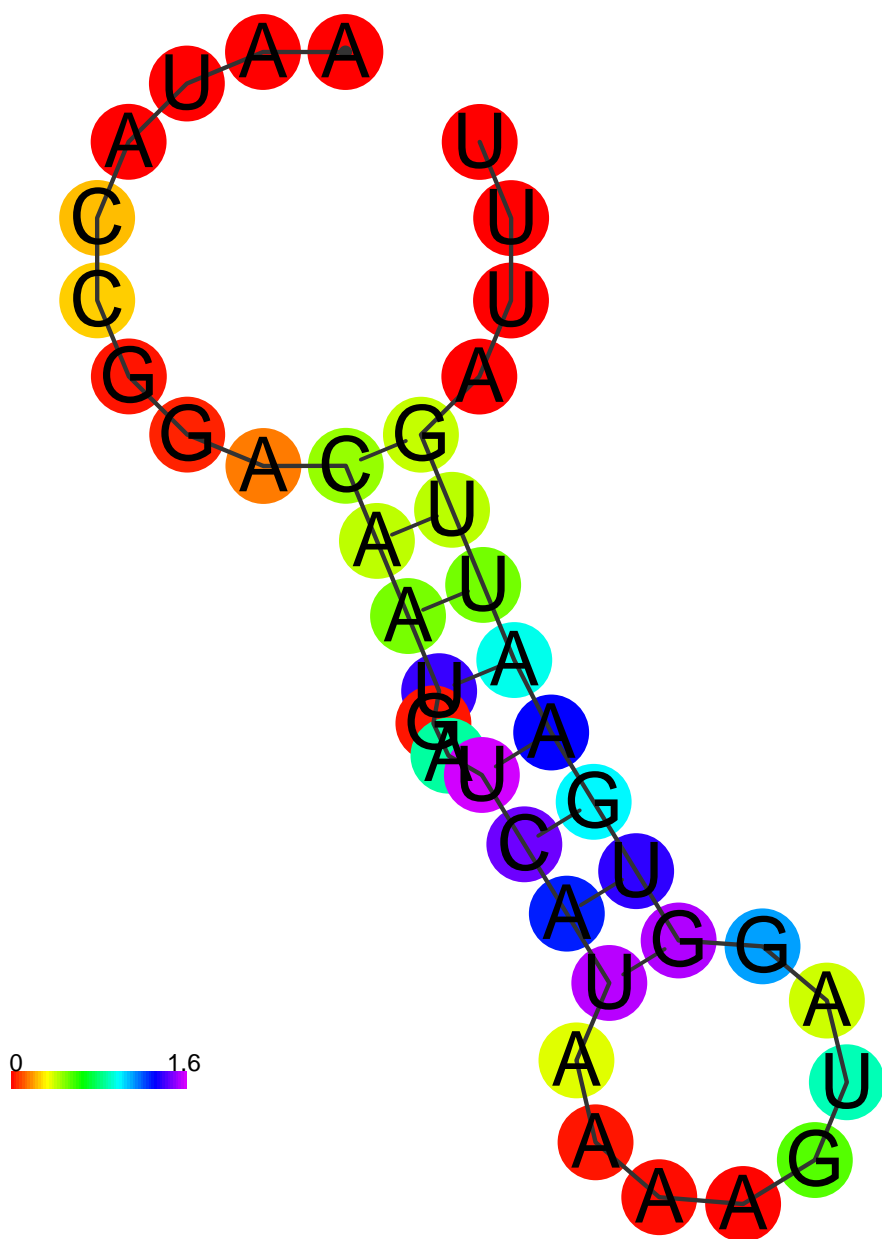

Supplement: Supplementary file 533 [file supplementary]

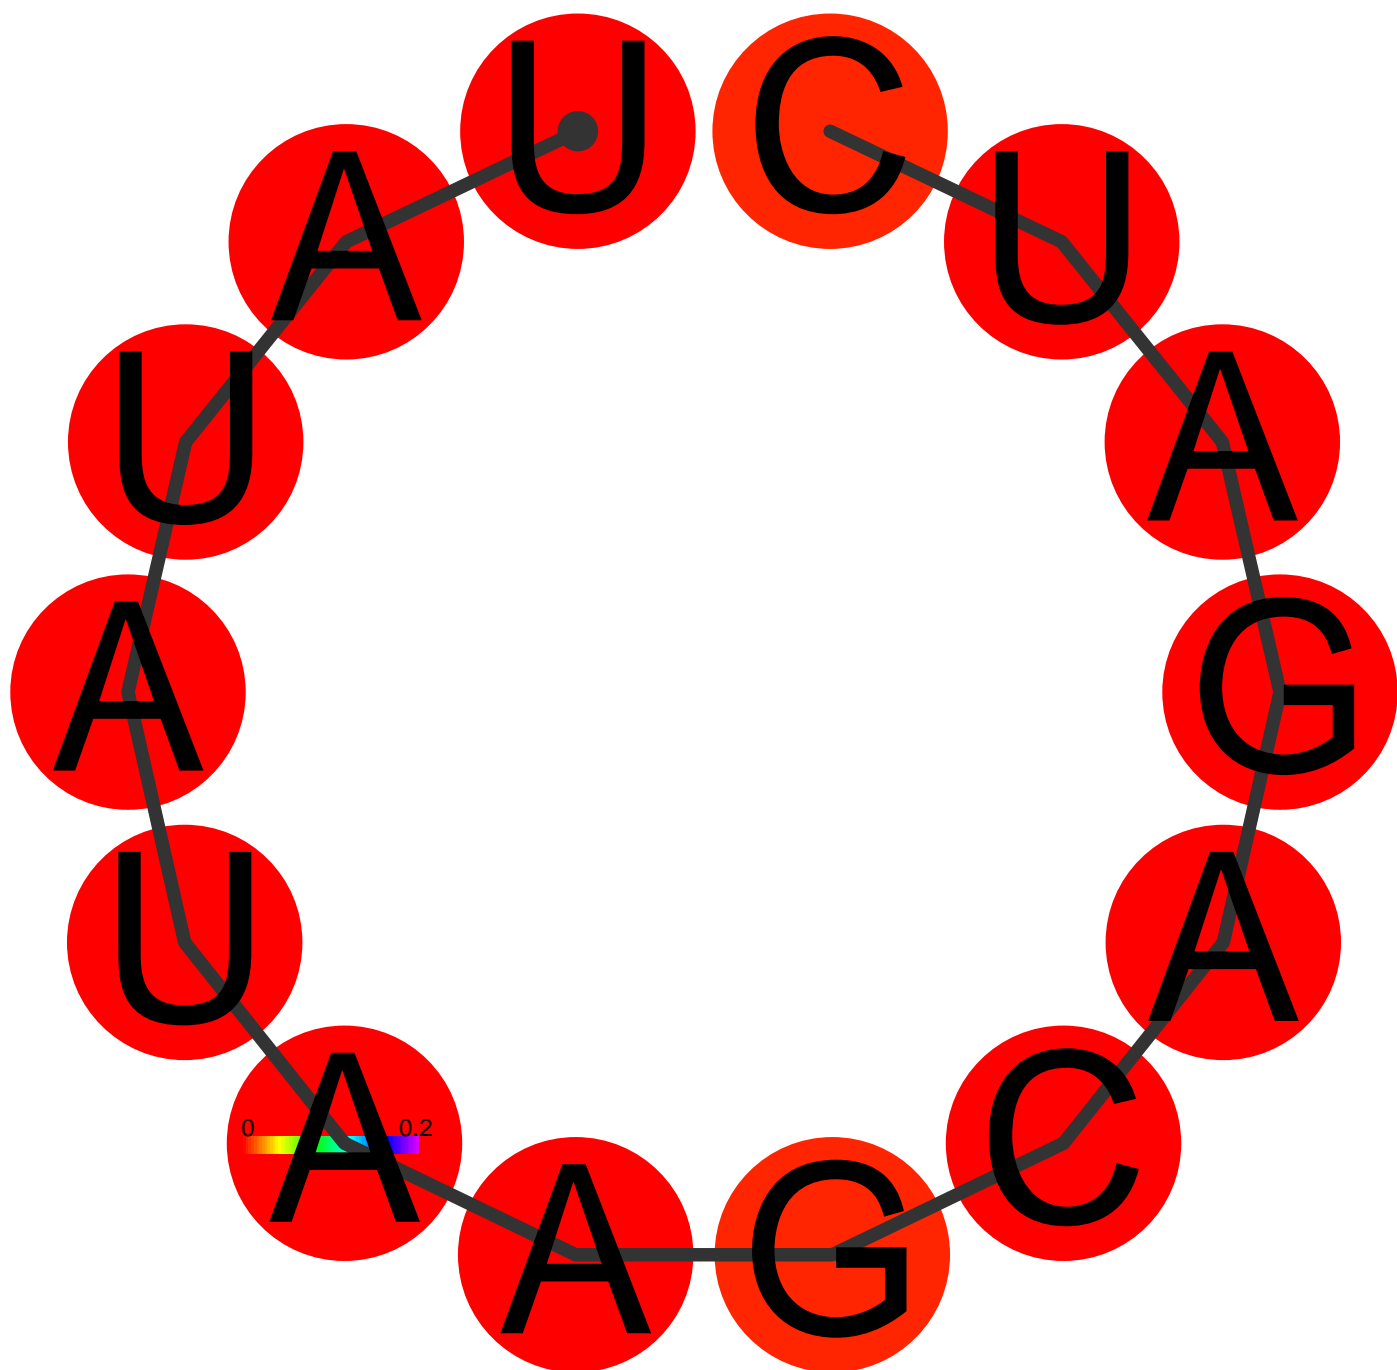

Supplement: Supplementary file 534 [file supplementary]

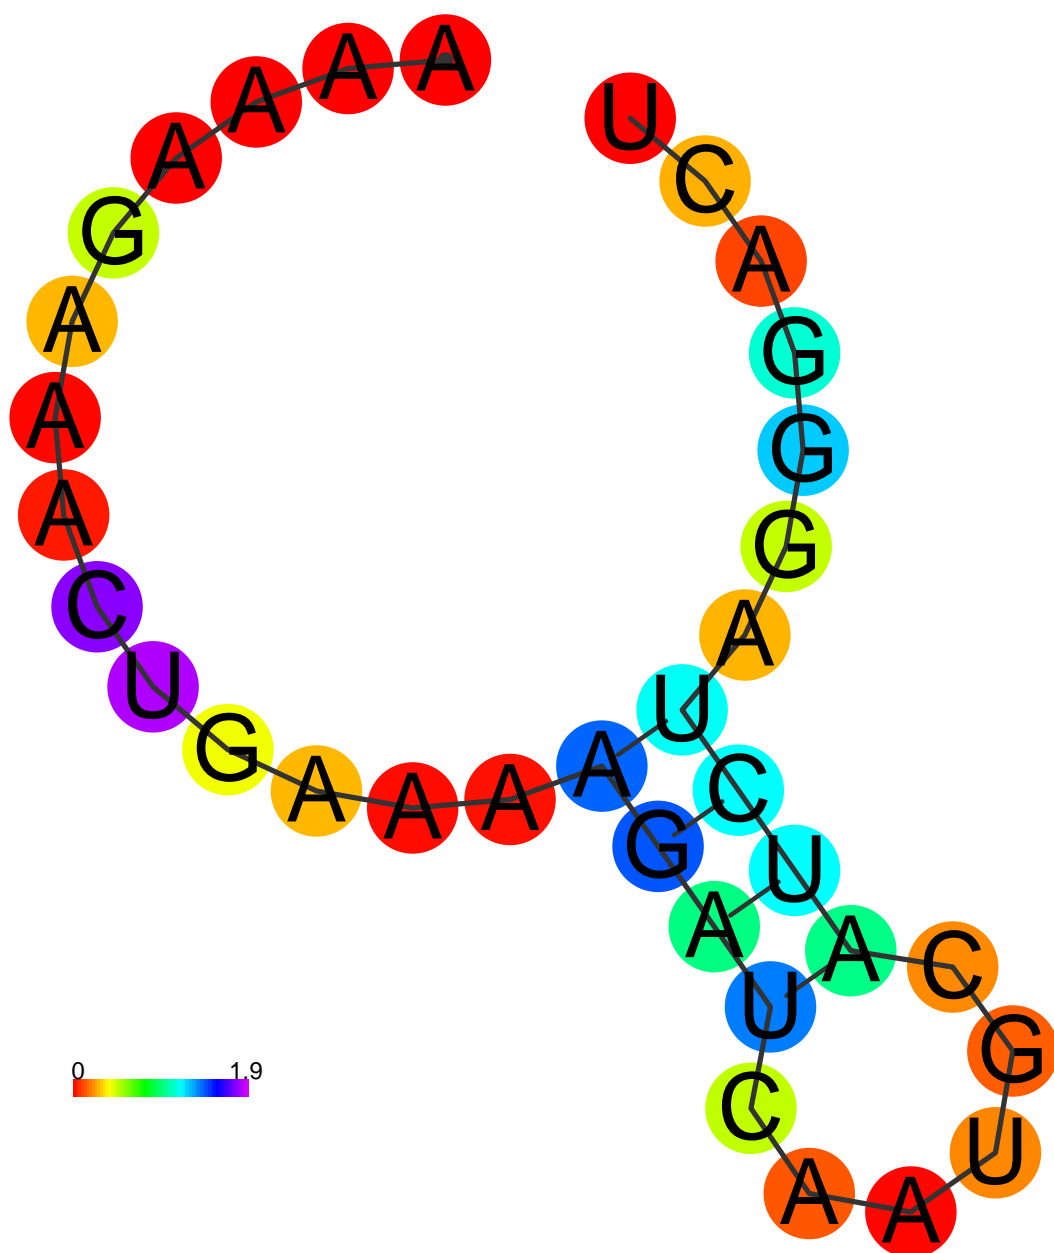

Supplement: Supplementary file 535 [file supplementary]

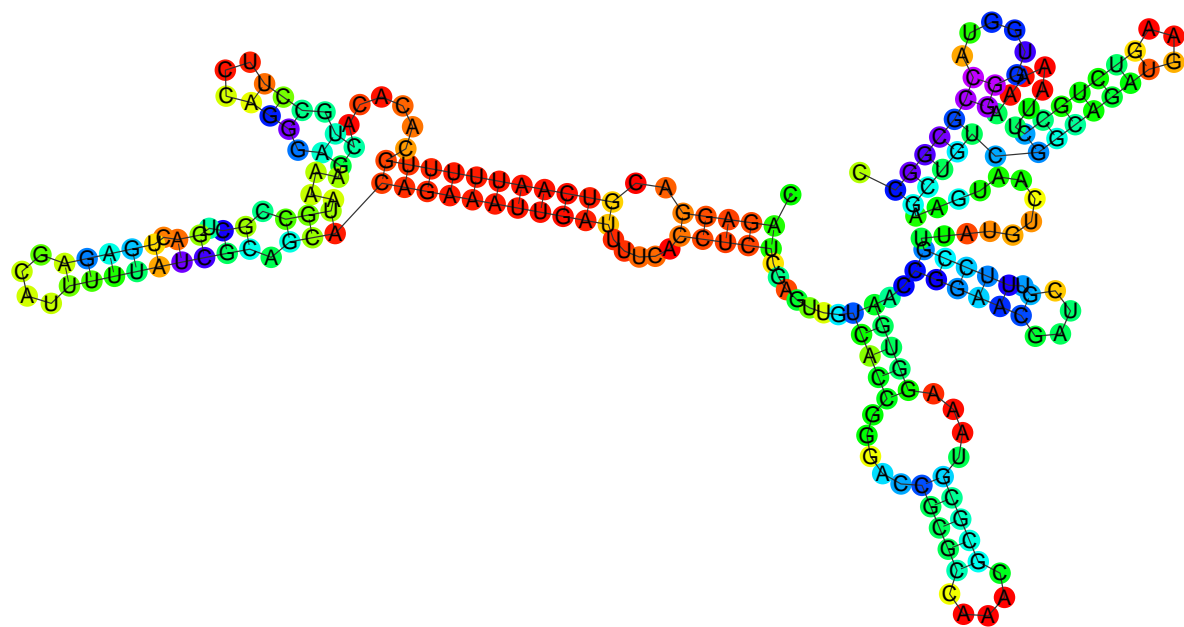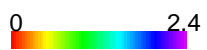

Supplement: Supplementary file 536 [file supplementary]

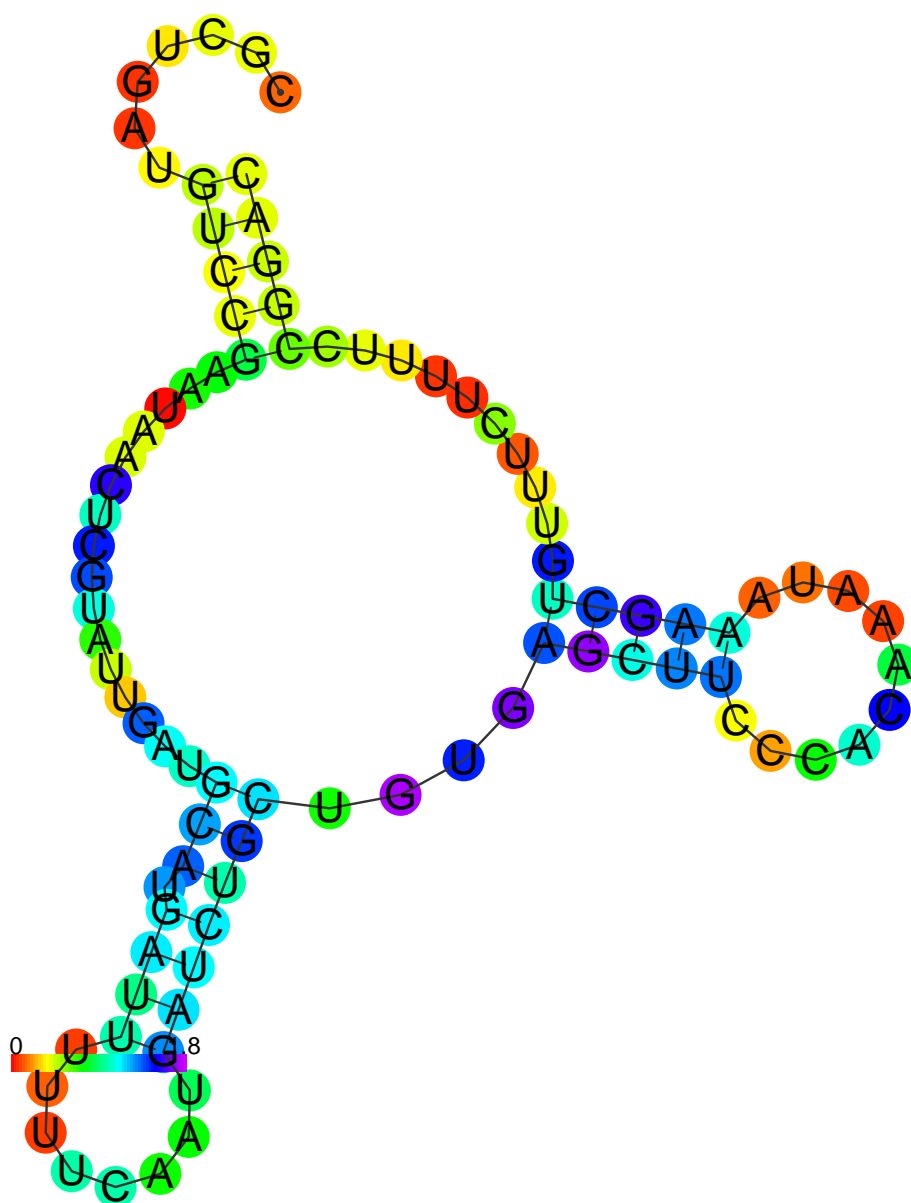

Supplement: Supplementary file 537 [file supplementary]

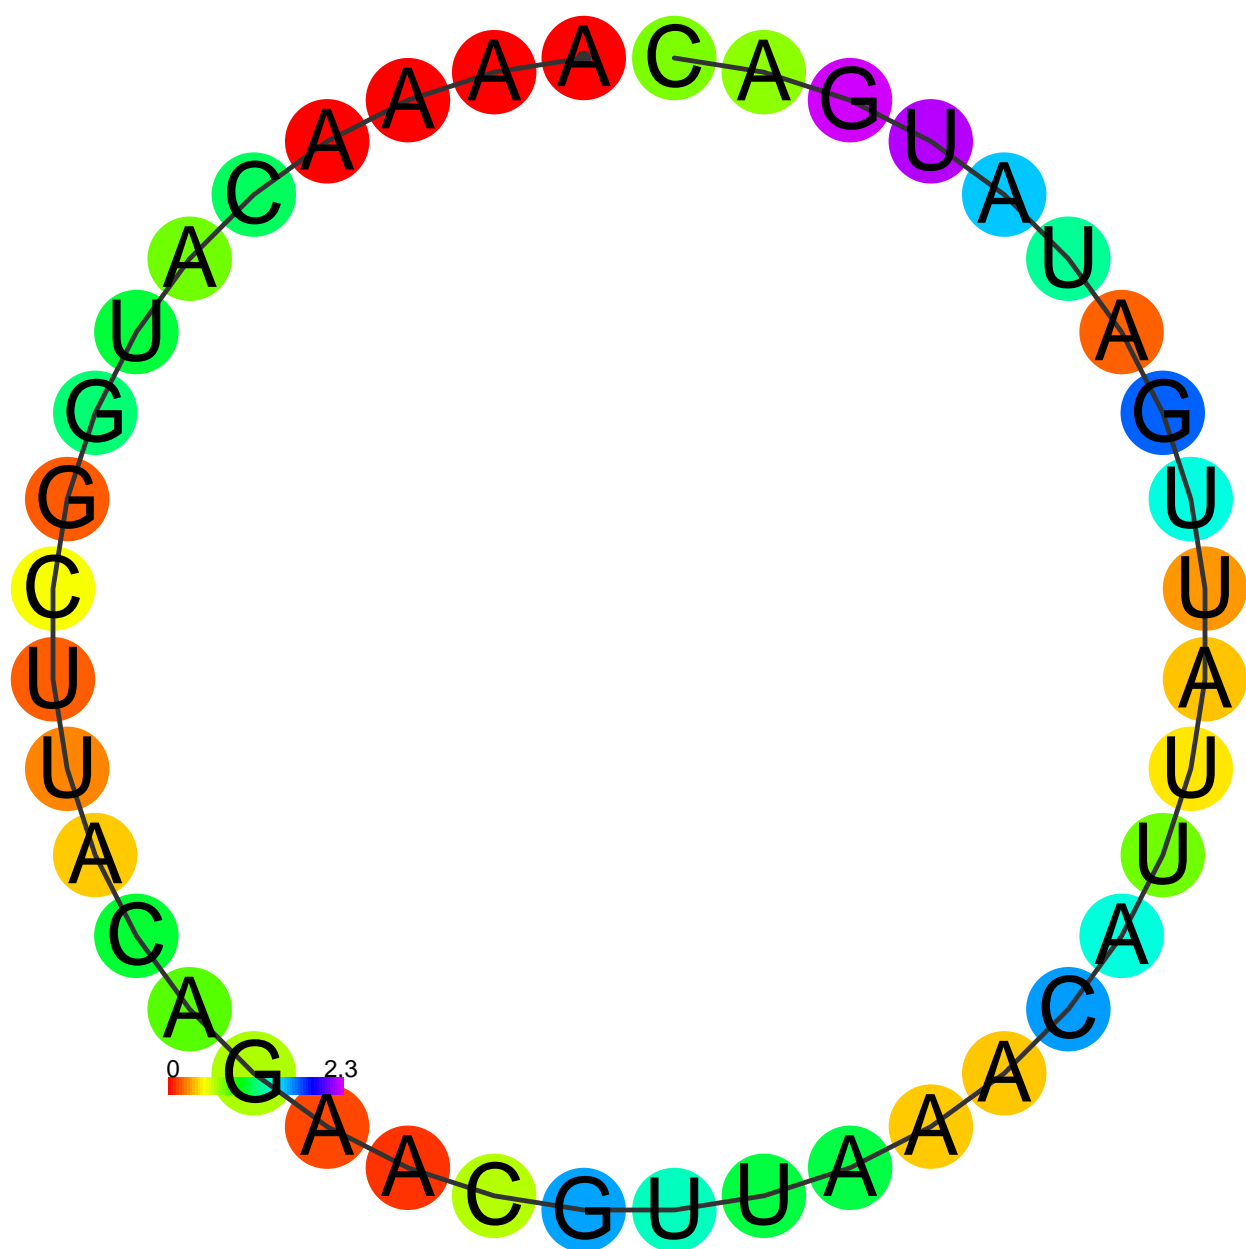

Supplement: Supplementary file 538 [file supplementary]

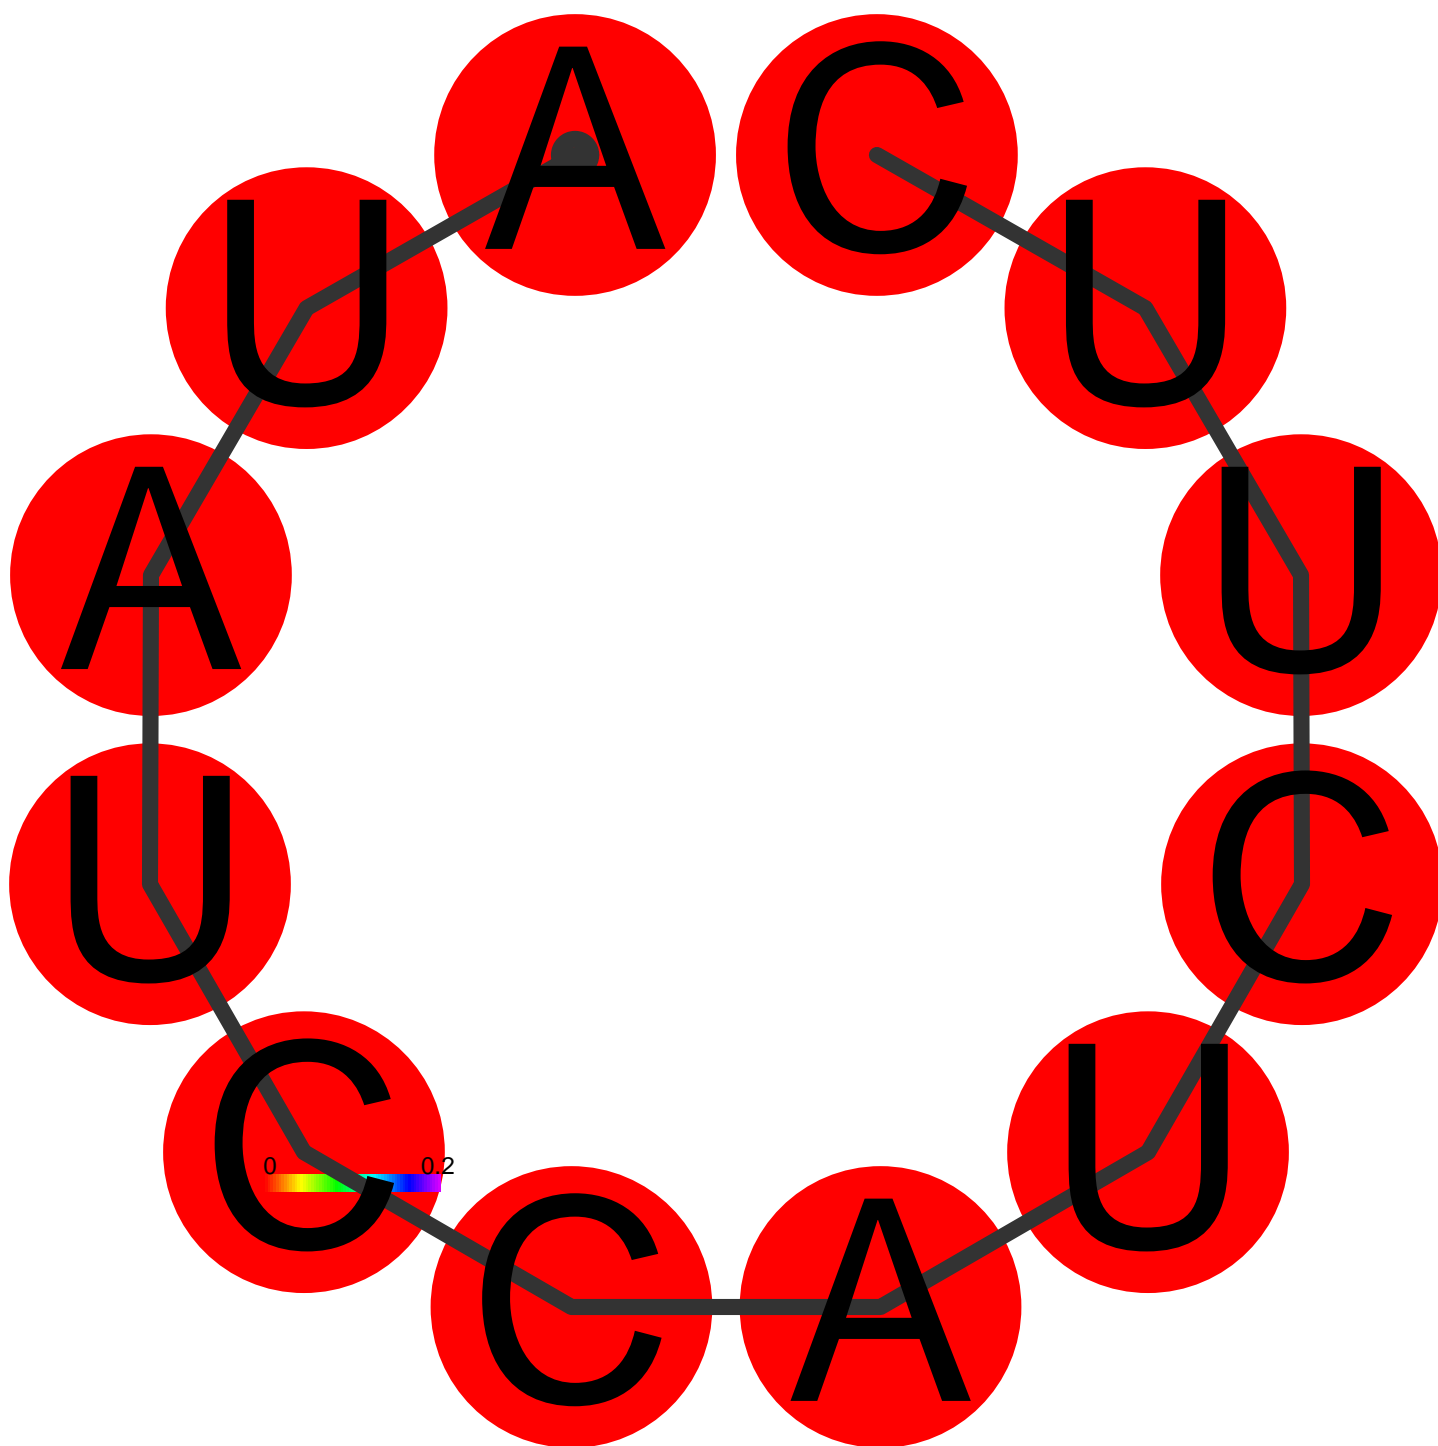

Supplement: Supplementary file 539 [file supplementary]

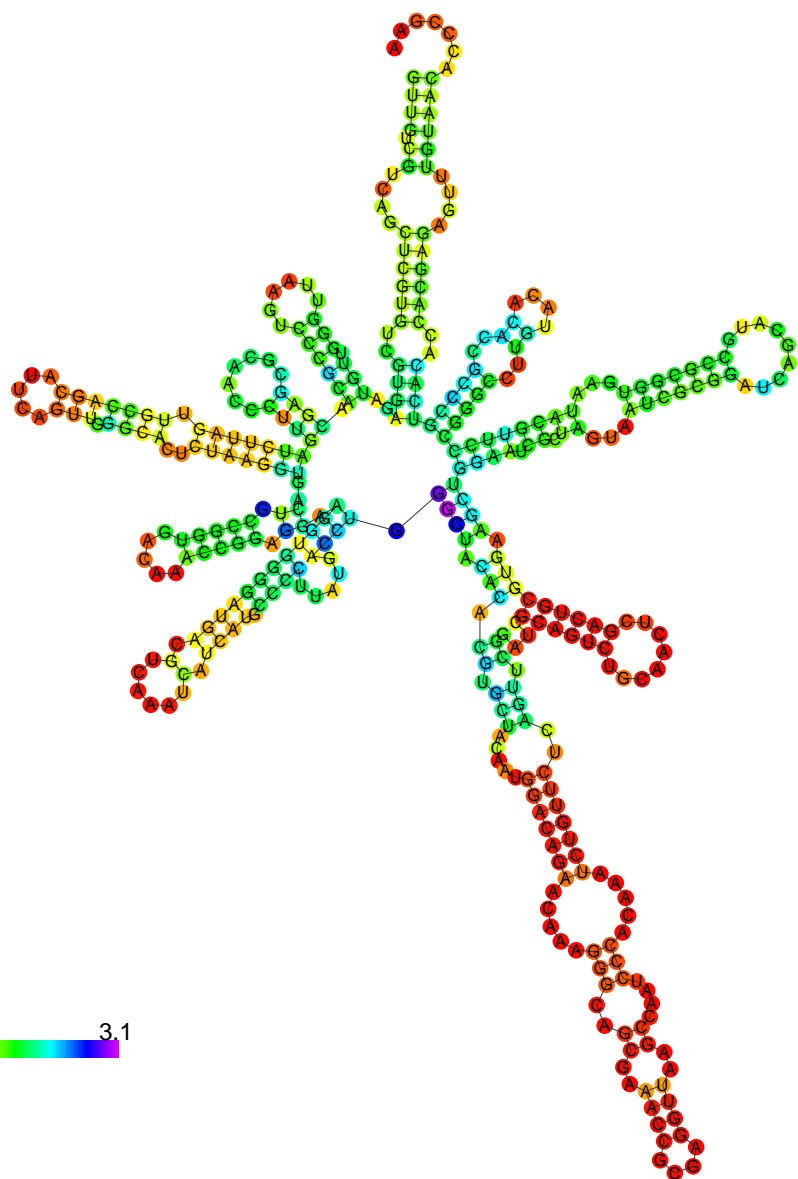

Supplement: Supplementary file 540 [file supplementary]

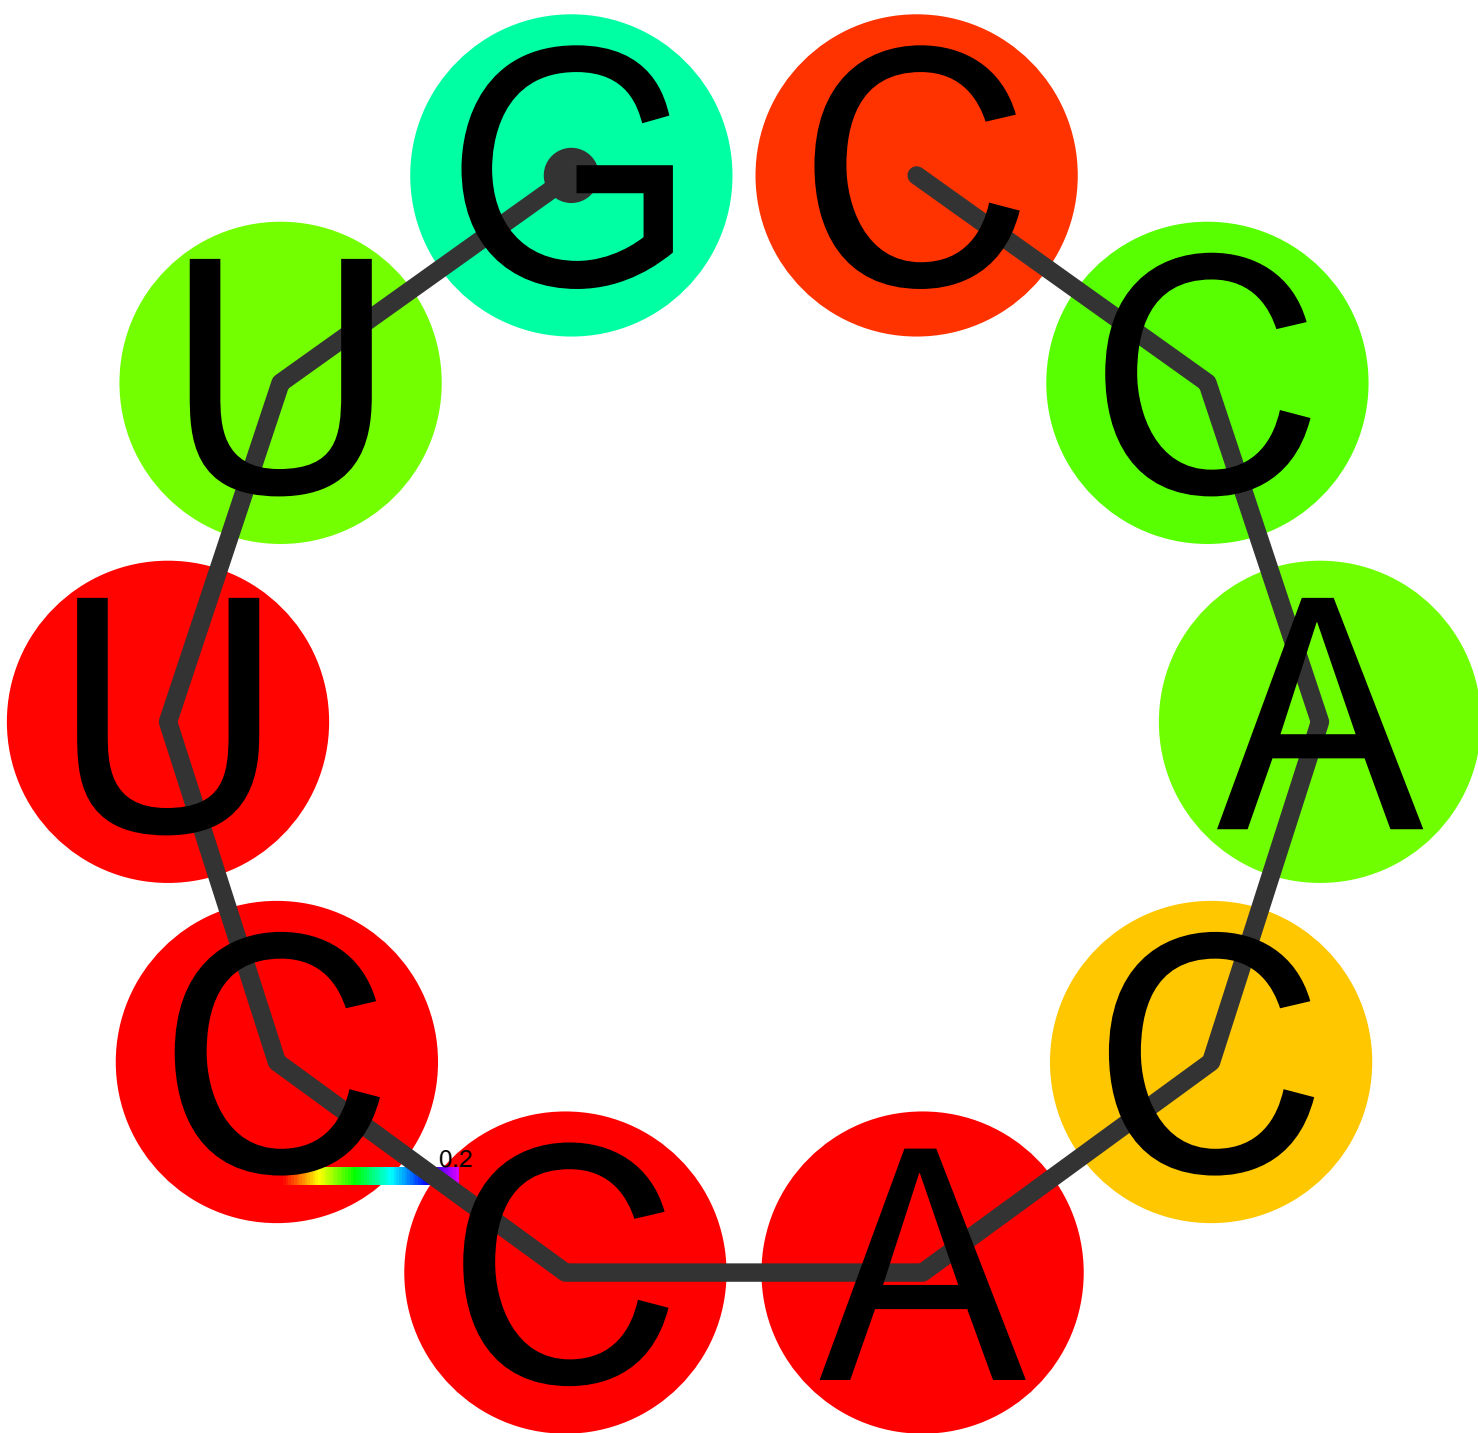

Supplement: Supplementary file 541 [file supplementary]

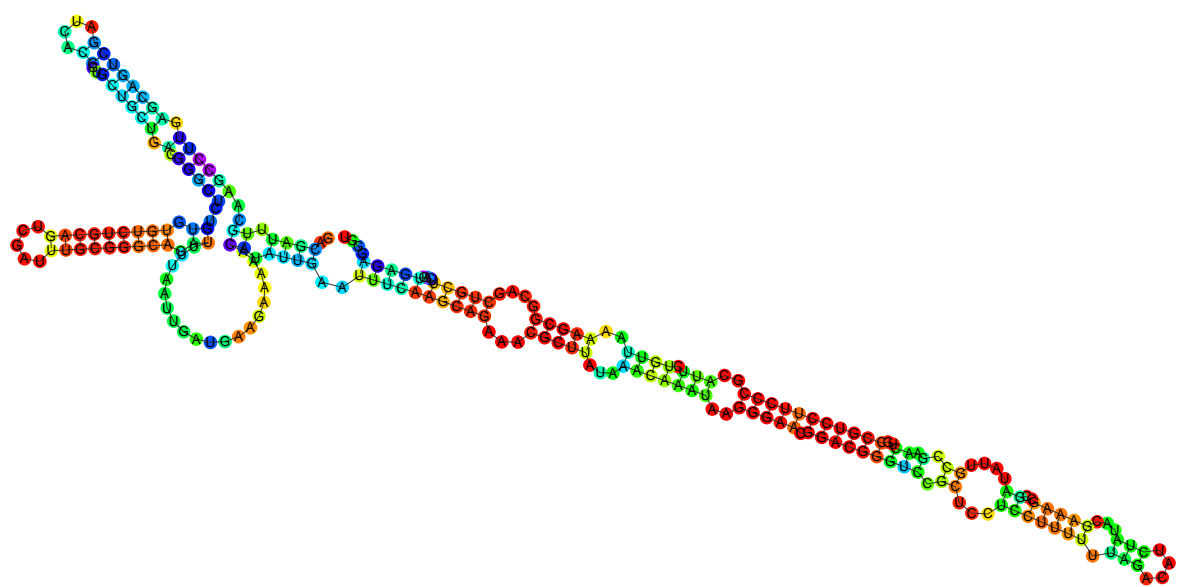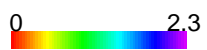

Supplement: Supplementary file 542 [file supplementary]

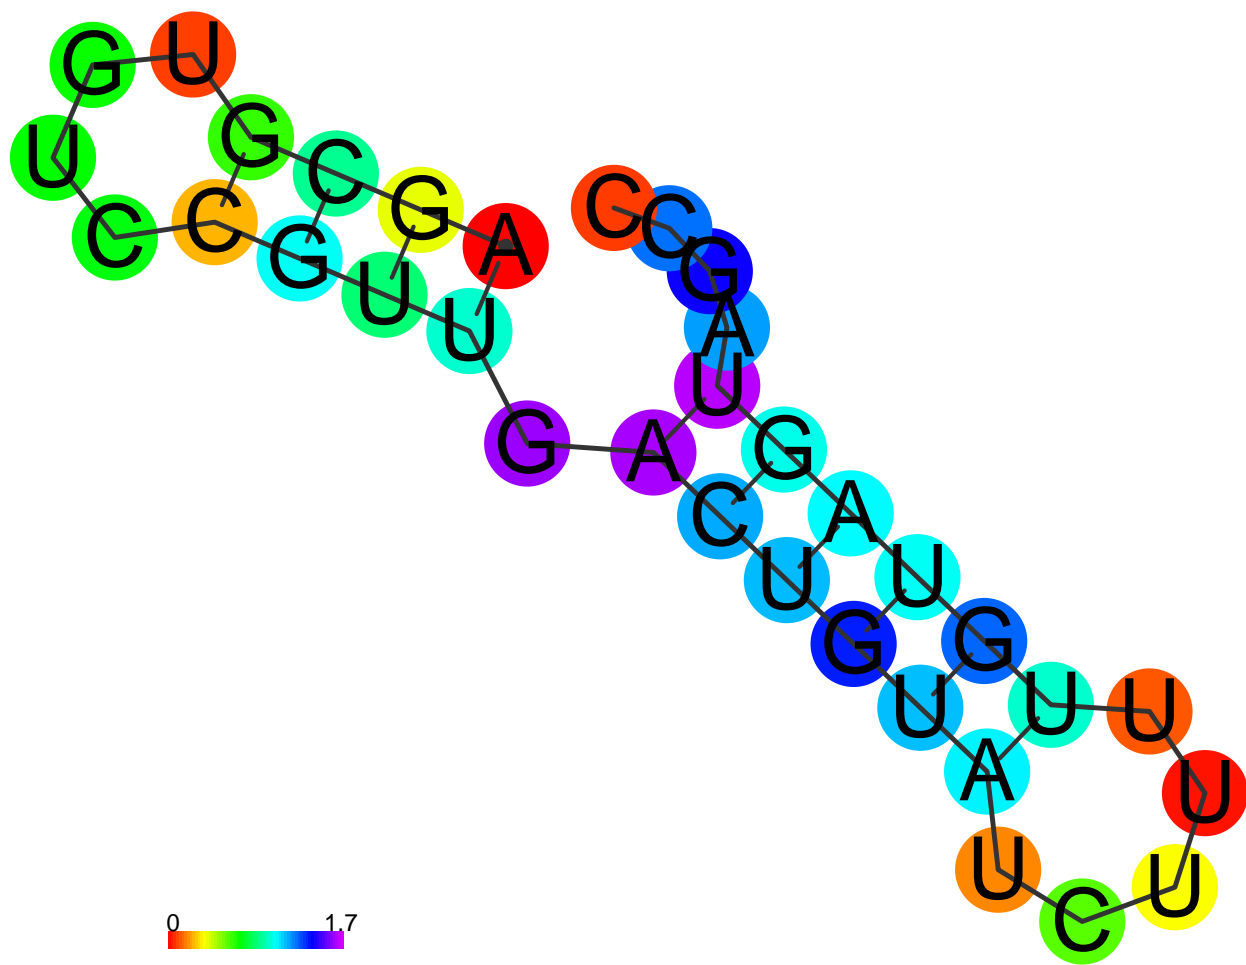

Supplement: Supplementary file 543 [file supplementary]

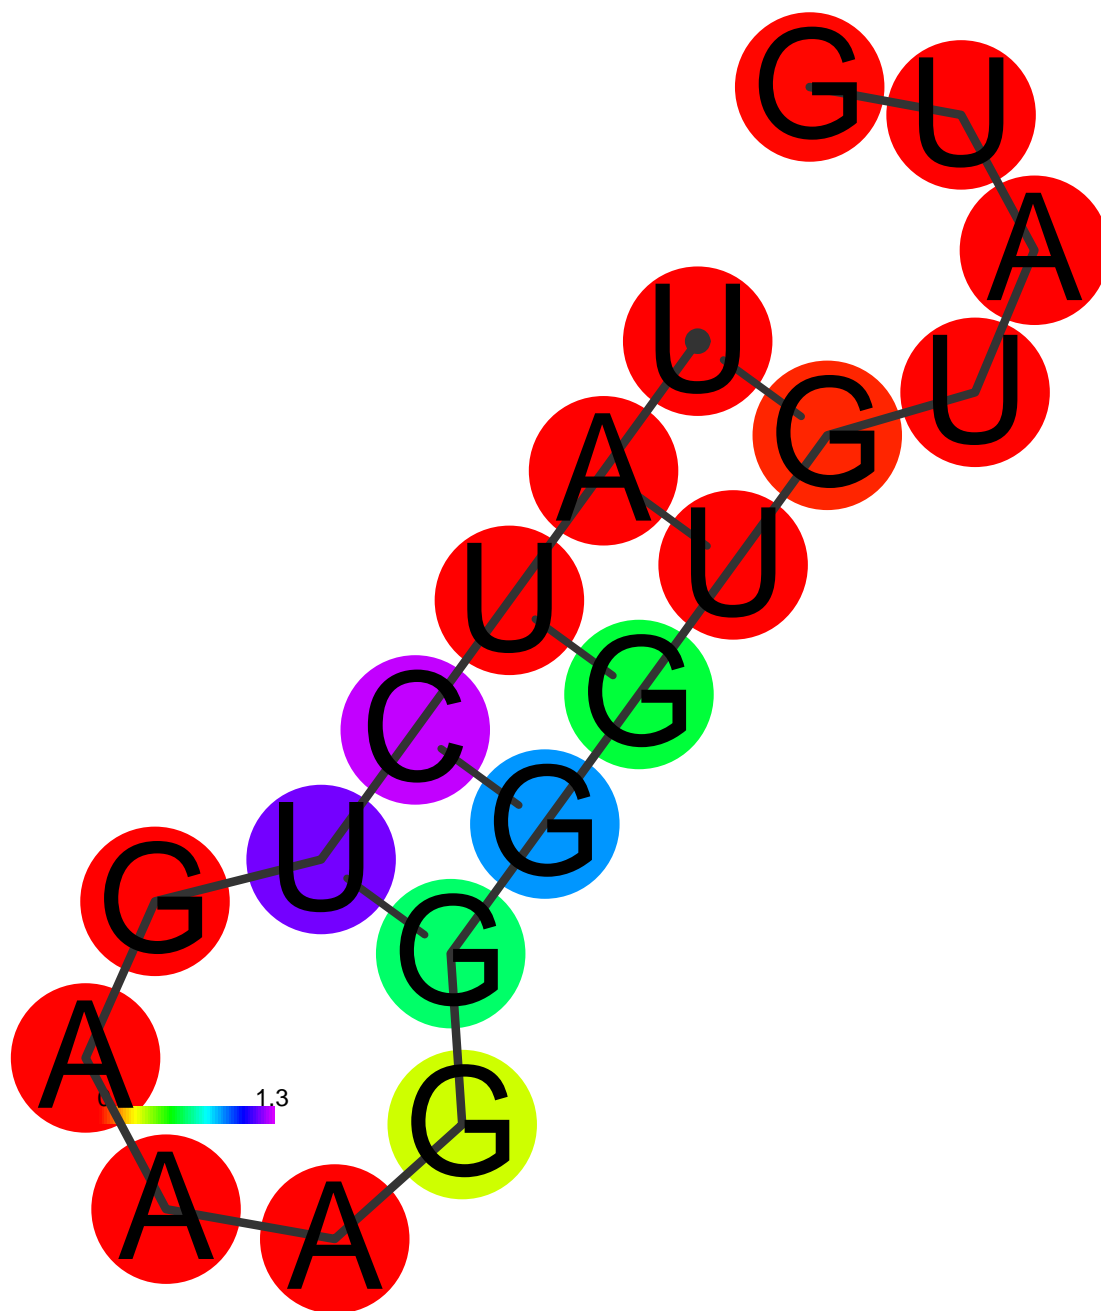

Supplement: Supplementary file 544 [file supplementary]

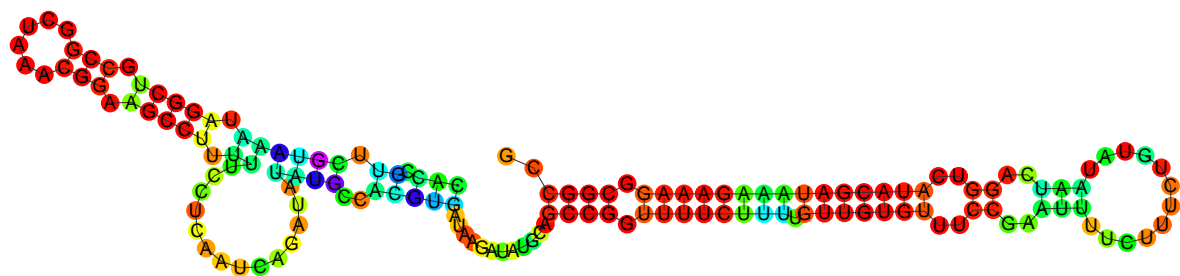

Supplement: Supplementary file 545 [file supplementary]

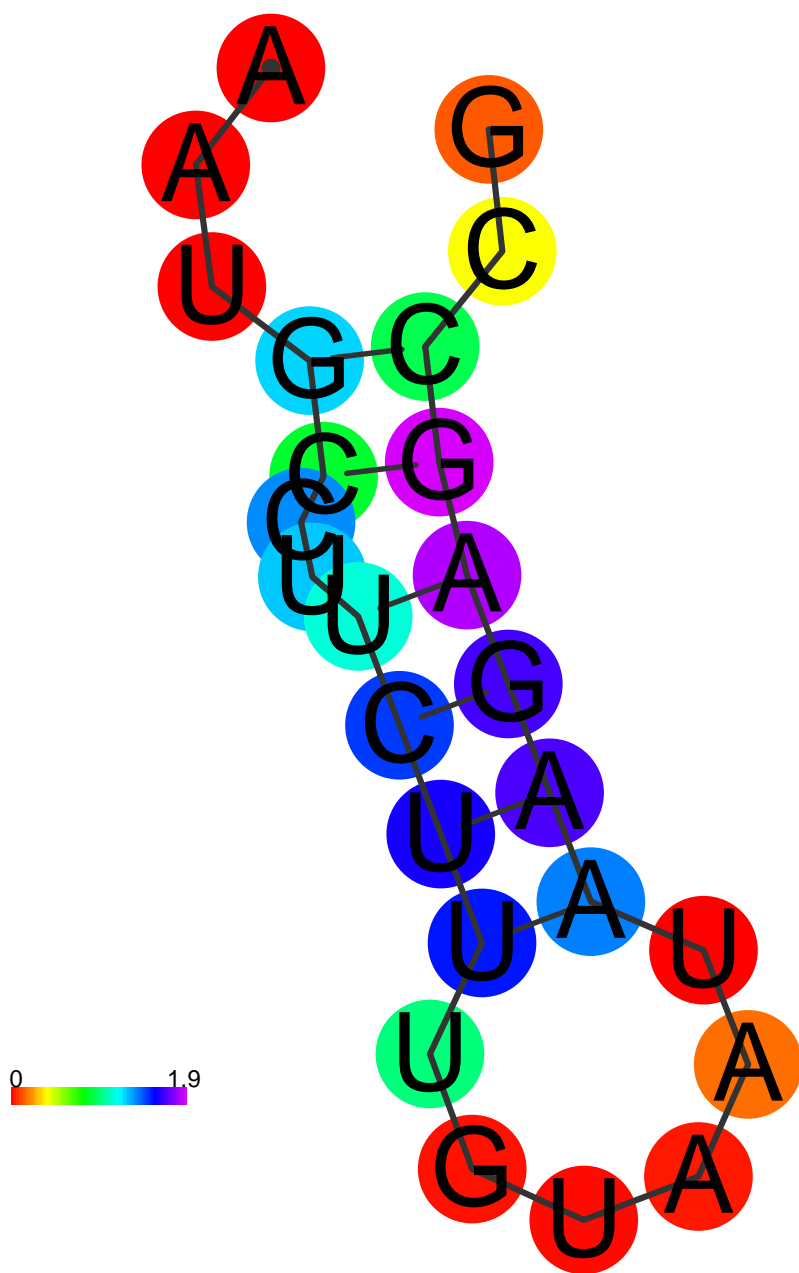

Supplement: Supplementary file 546 [file supplementary]

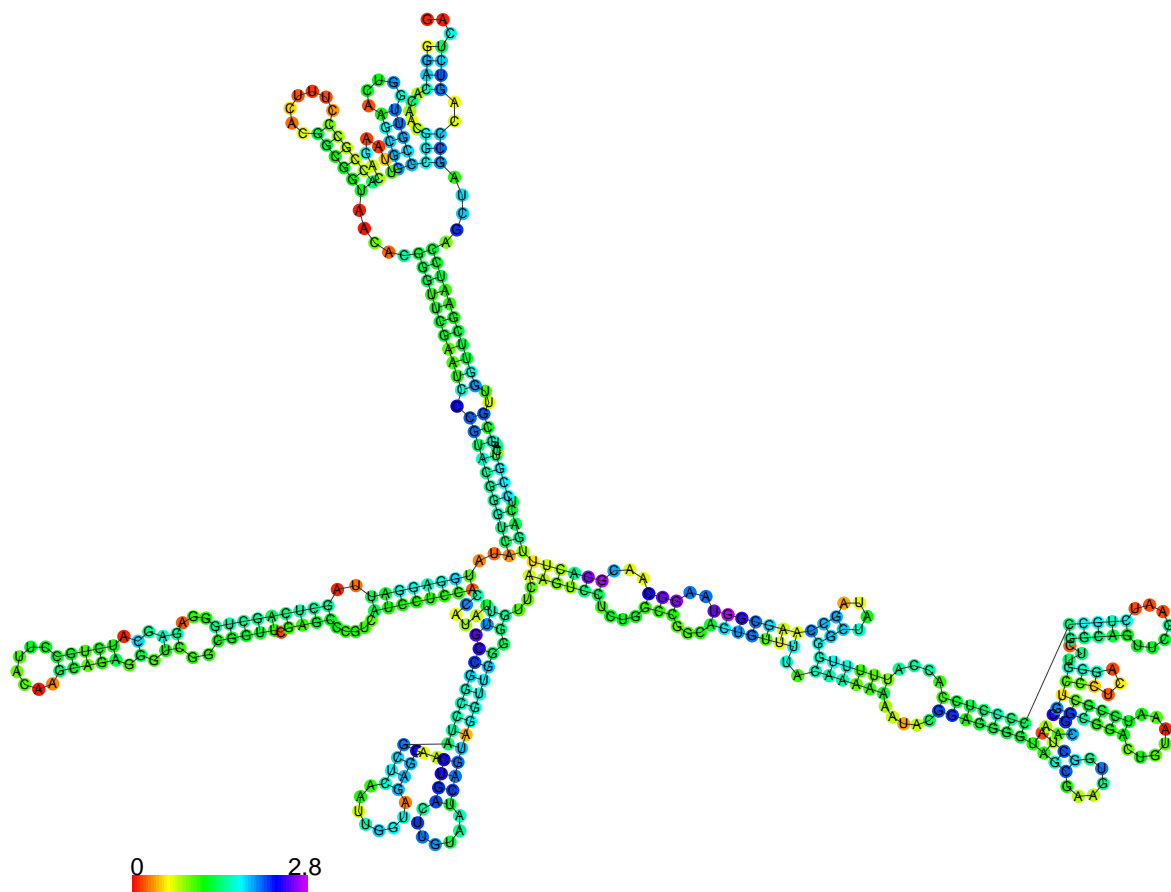

Supplement: Supplementary file 547 [file supplementary]

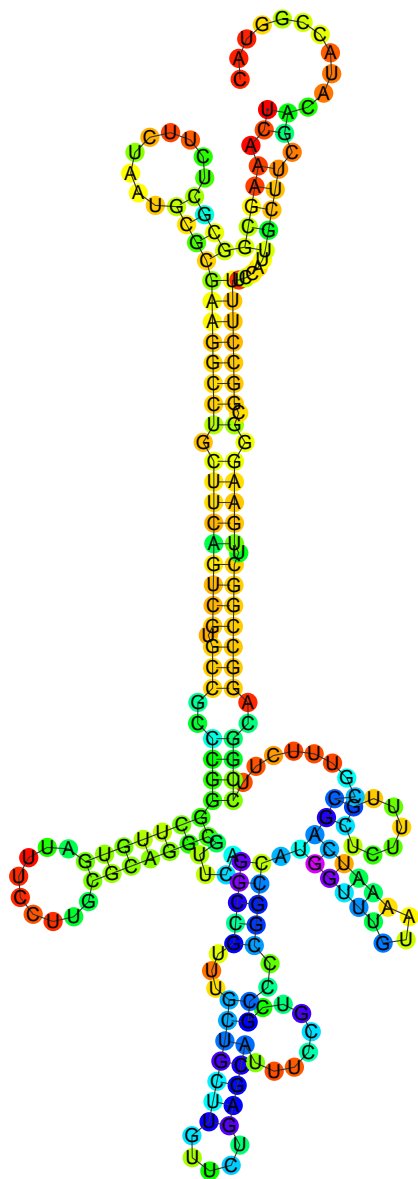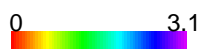

Supplement: Supplementary file 548 [file supplementary]

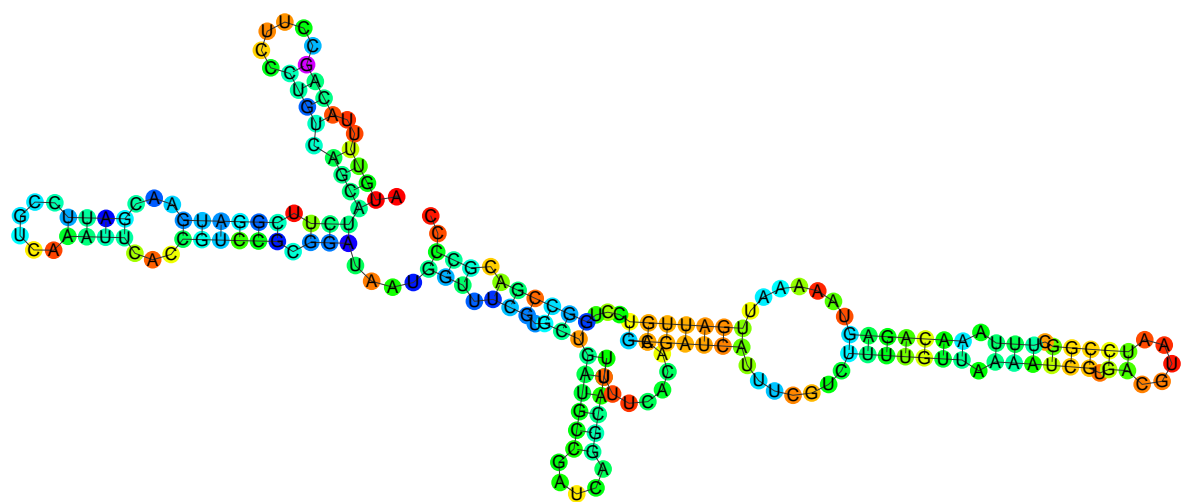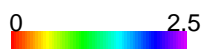

Supplement: Supplementary file 549 [file supplementary]

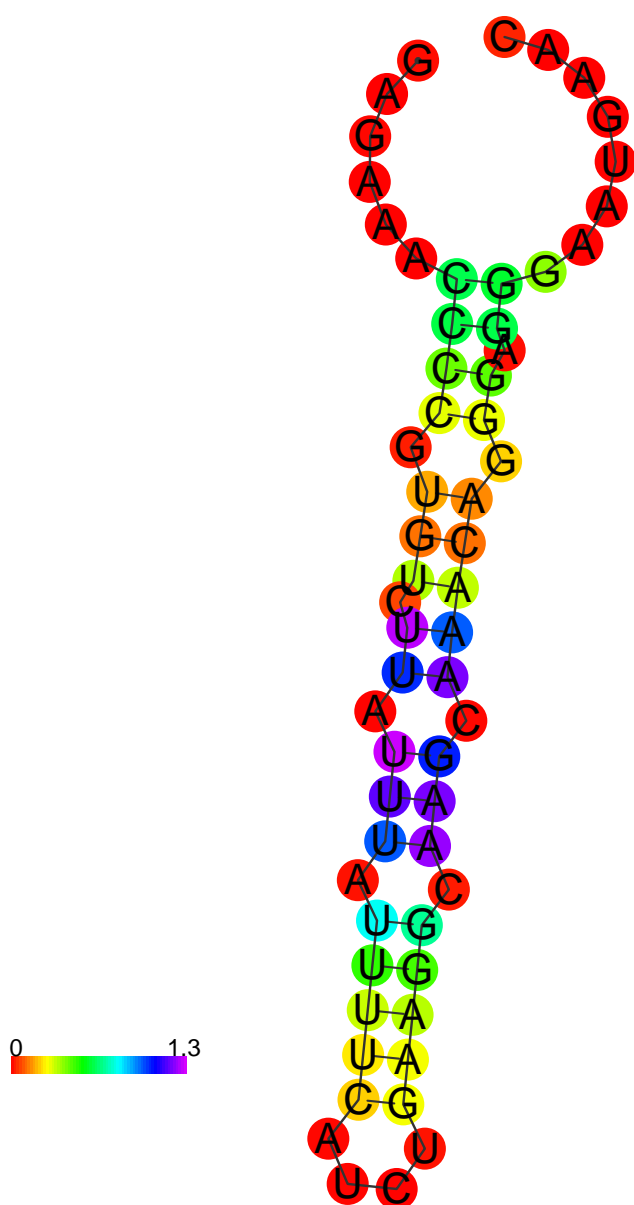

Supplement: Supplementary file 550 [file supplementary]

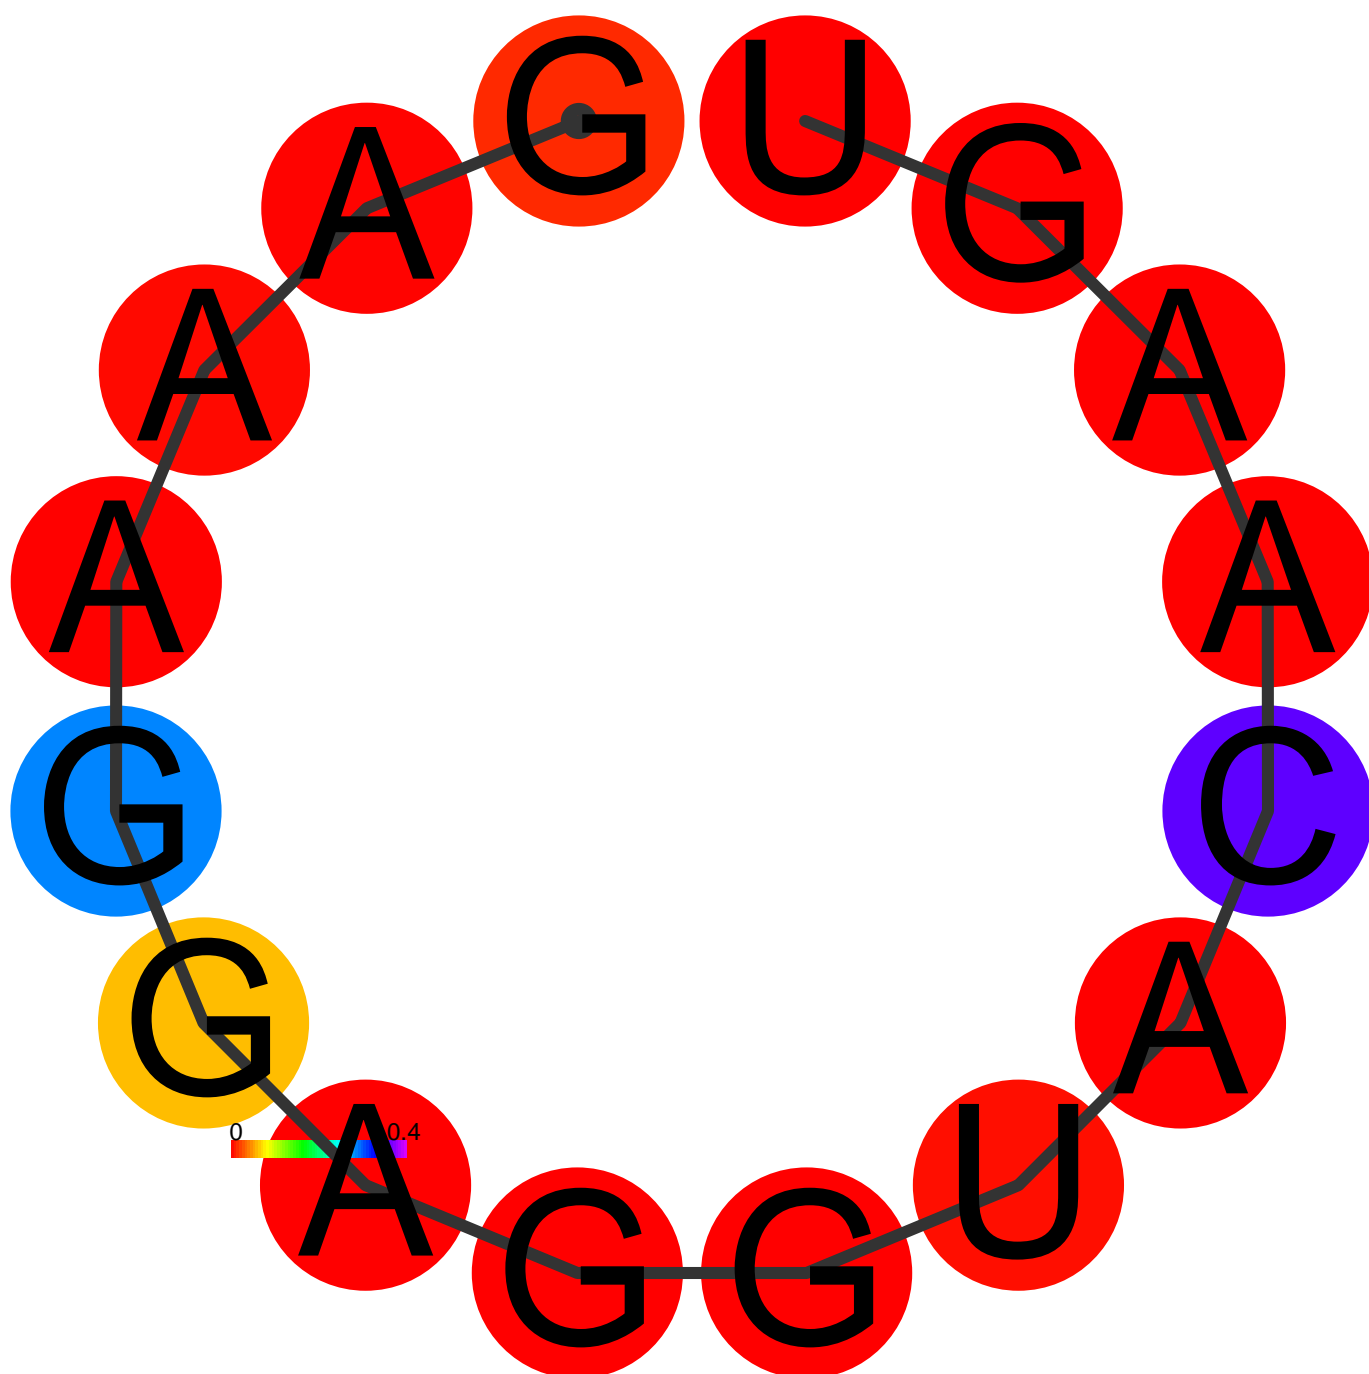

Supplement: Supplementary file 551 [file supplementary]

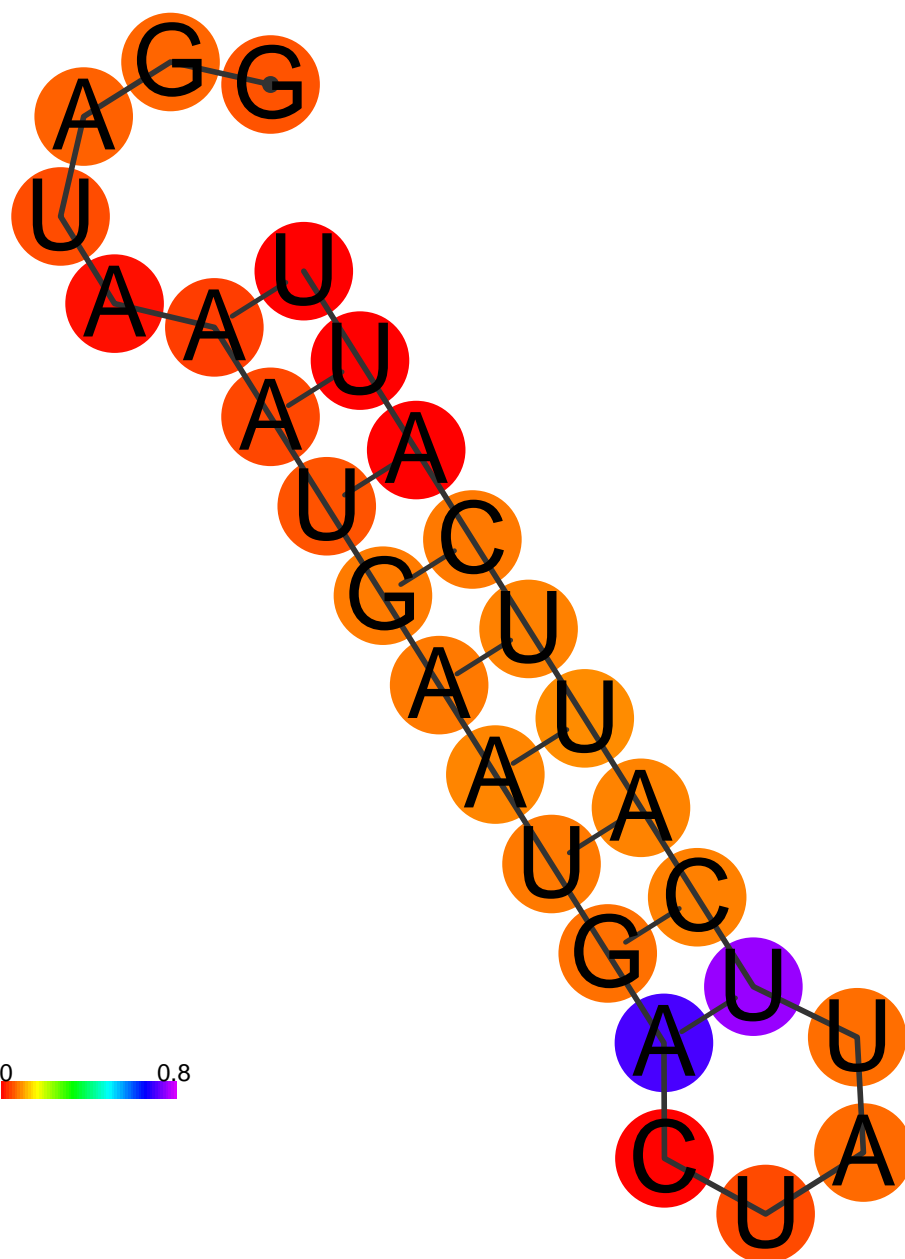

Supplement: Supplementary file 552 [file supplementary]

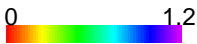

Supplement: Supplementary file 553 [file supplementary]

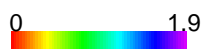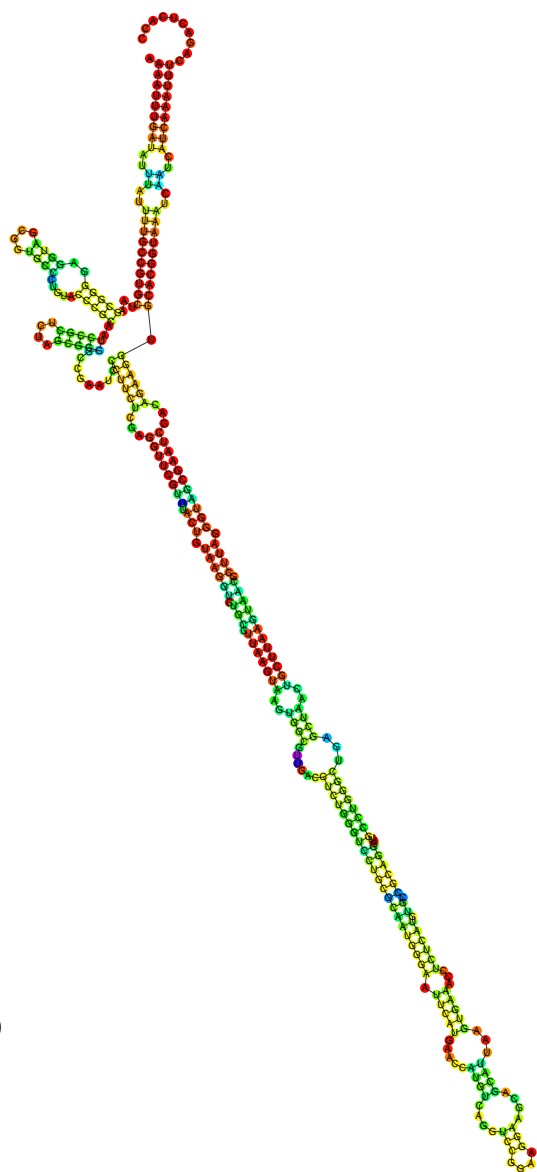

Supplement: Supplementary file 554 [file supplementary]

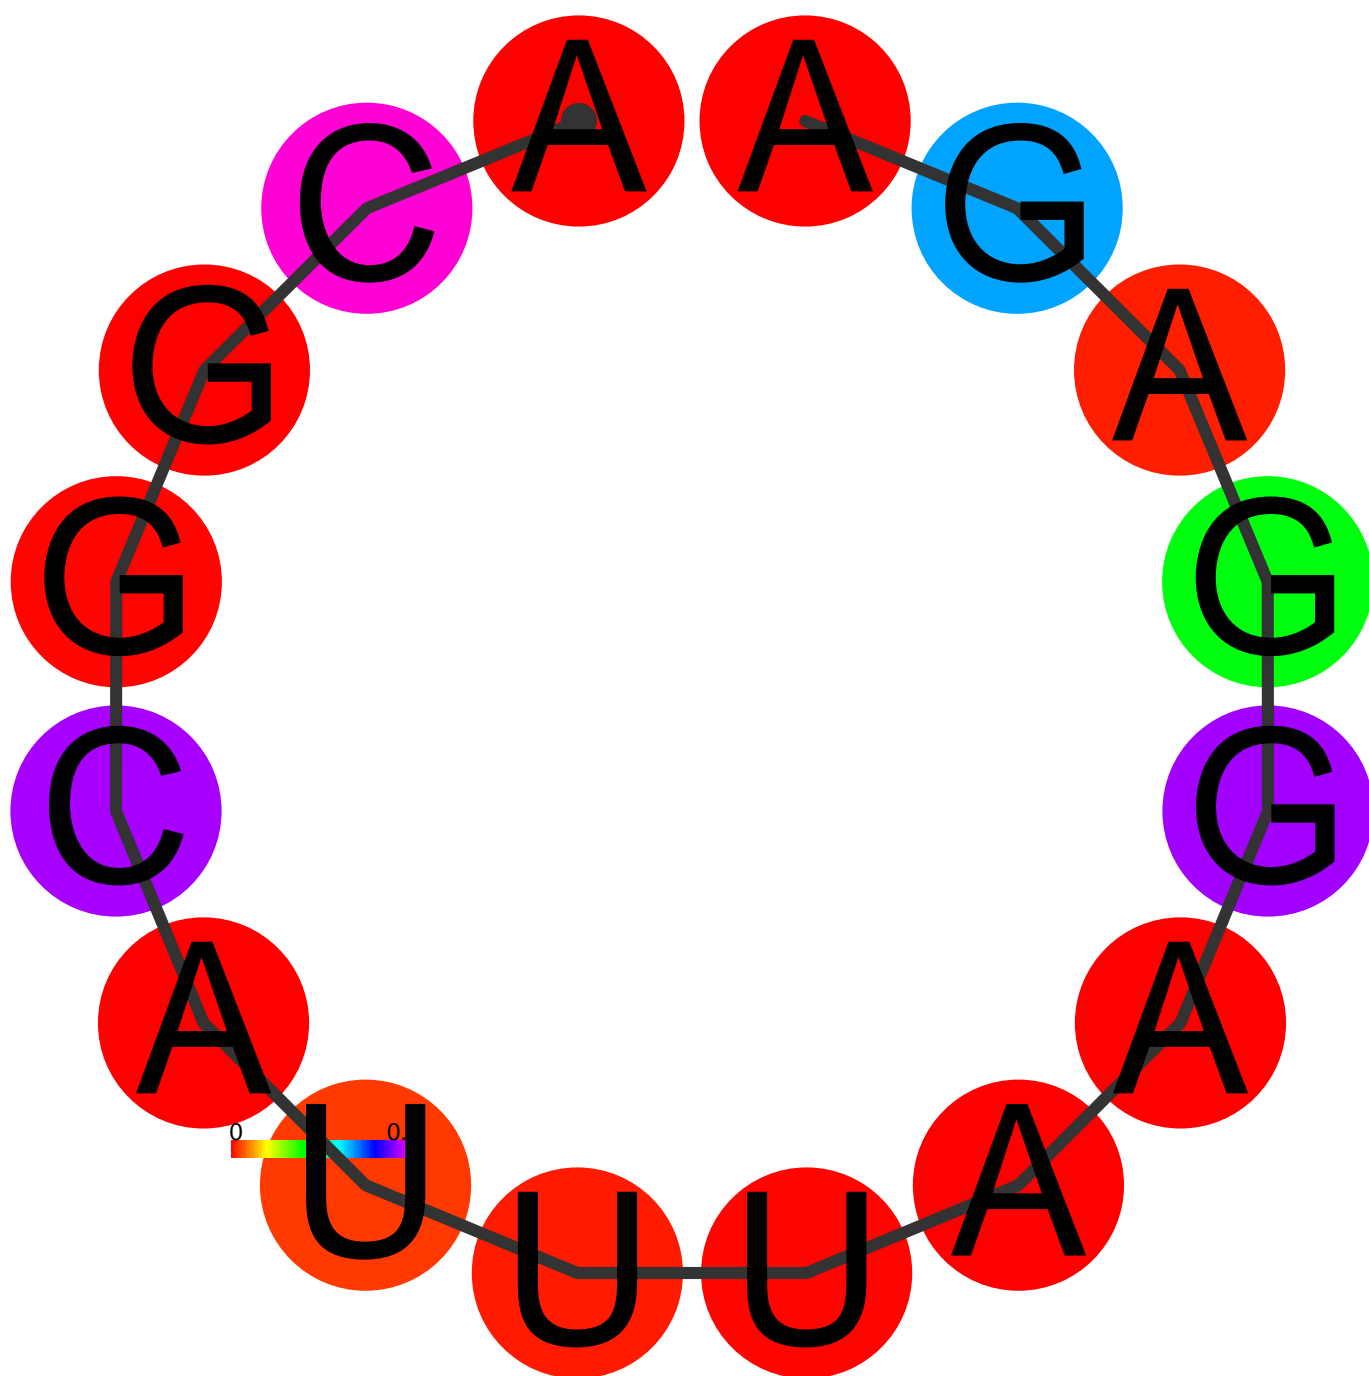

Supplement: Supplementary file 555 [file supplementary]

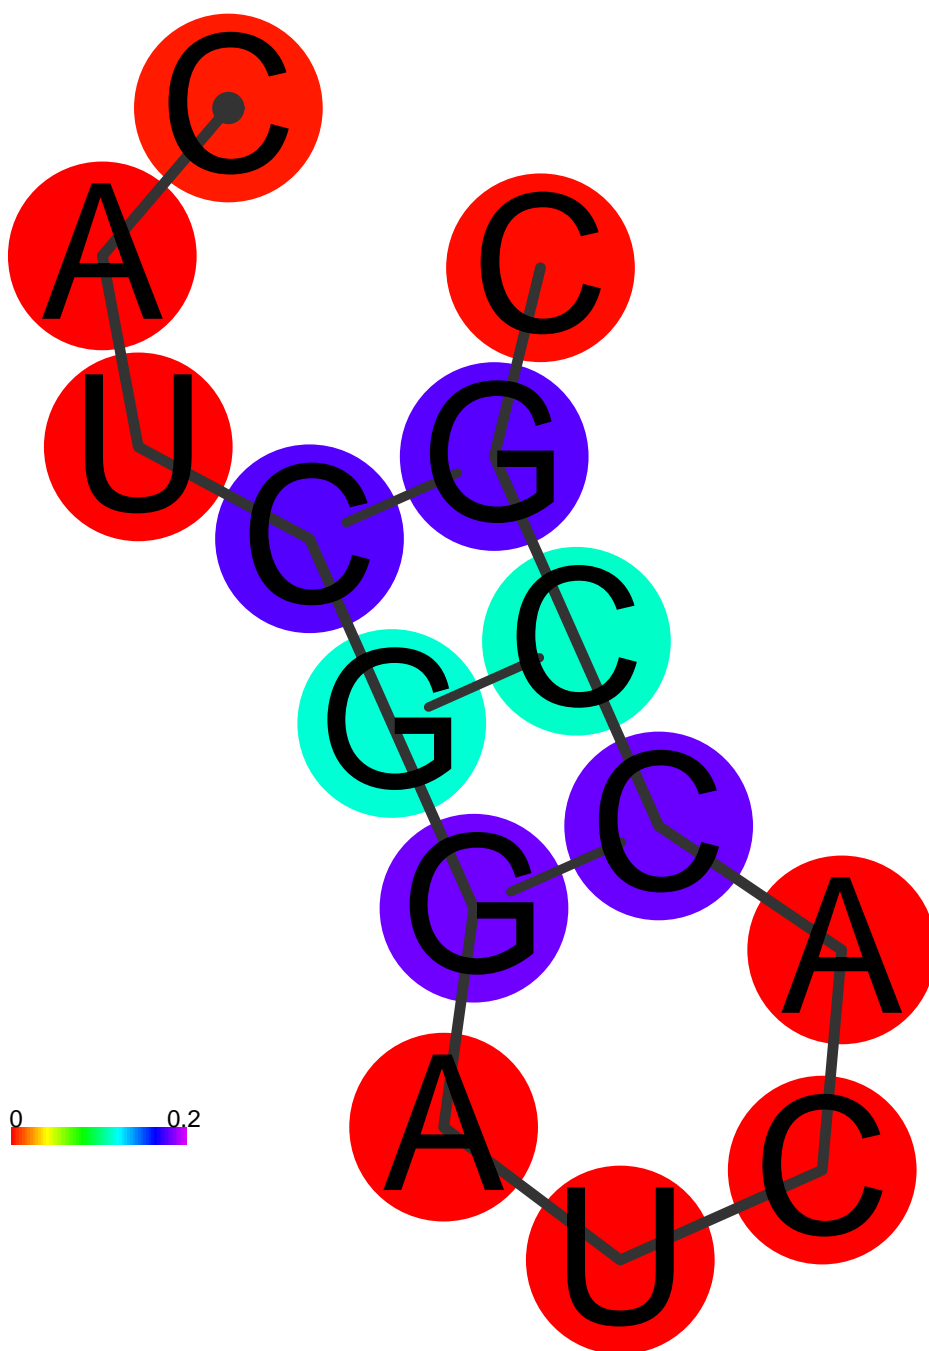

Supplement: Supplementary file 556 [file supplementary]

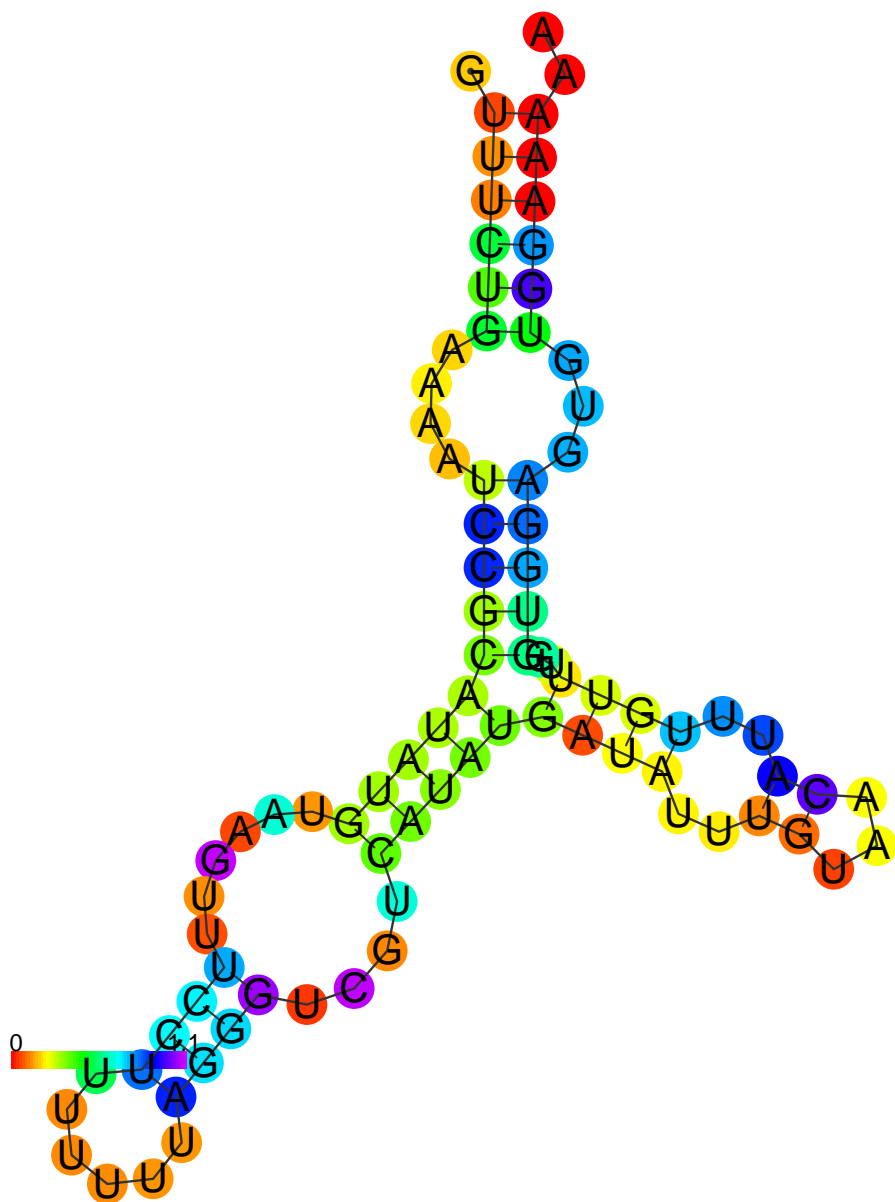

Supplement: Supplementary file 557 [file supplementary]

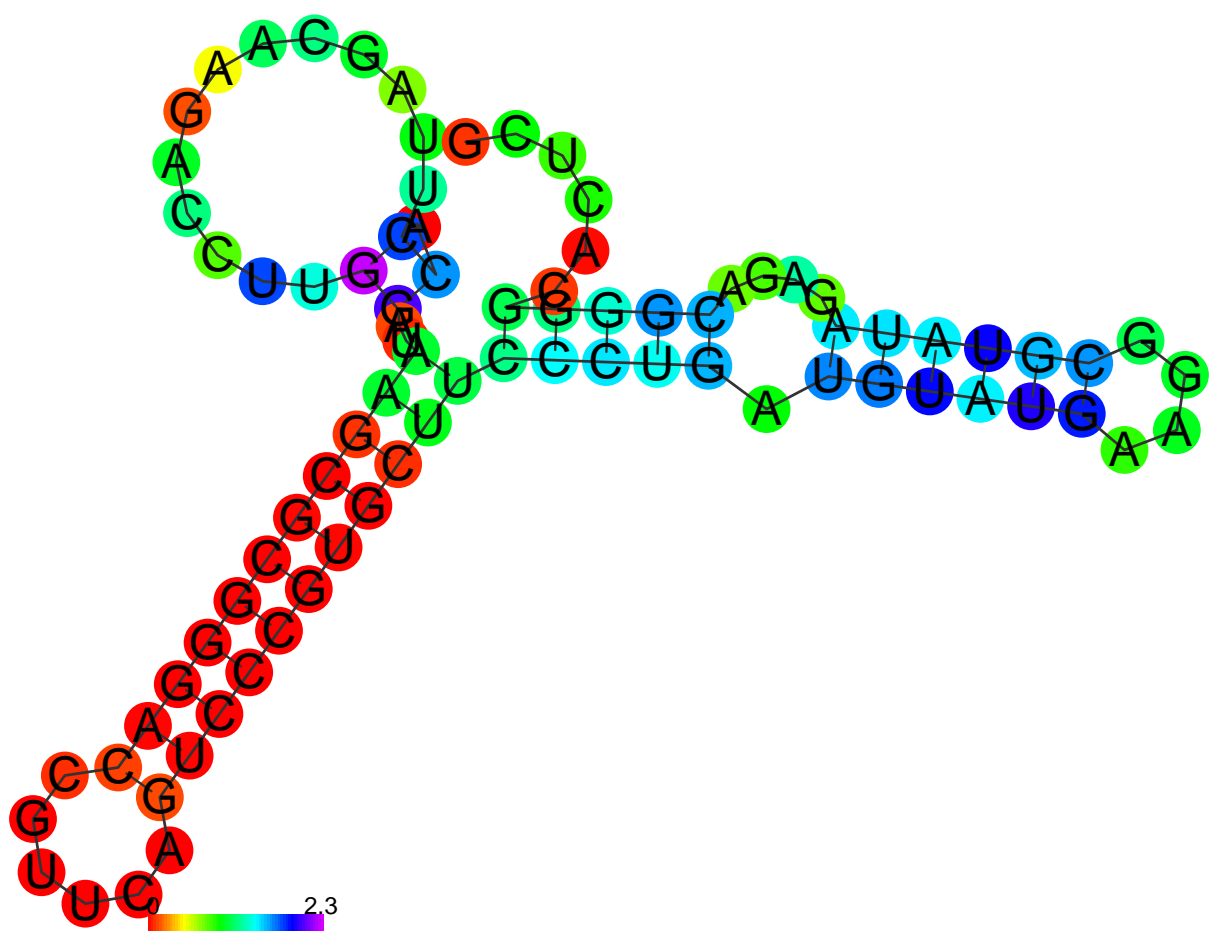

Supplement: Supplementary file 558 [file supplementary]

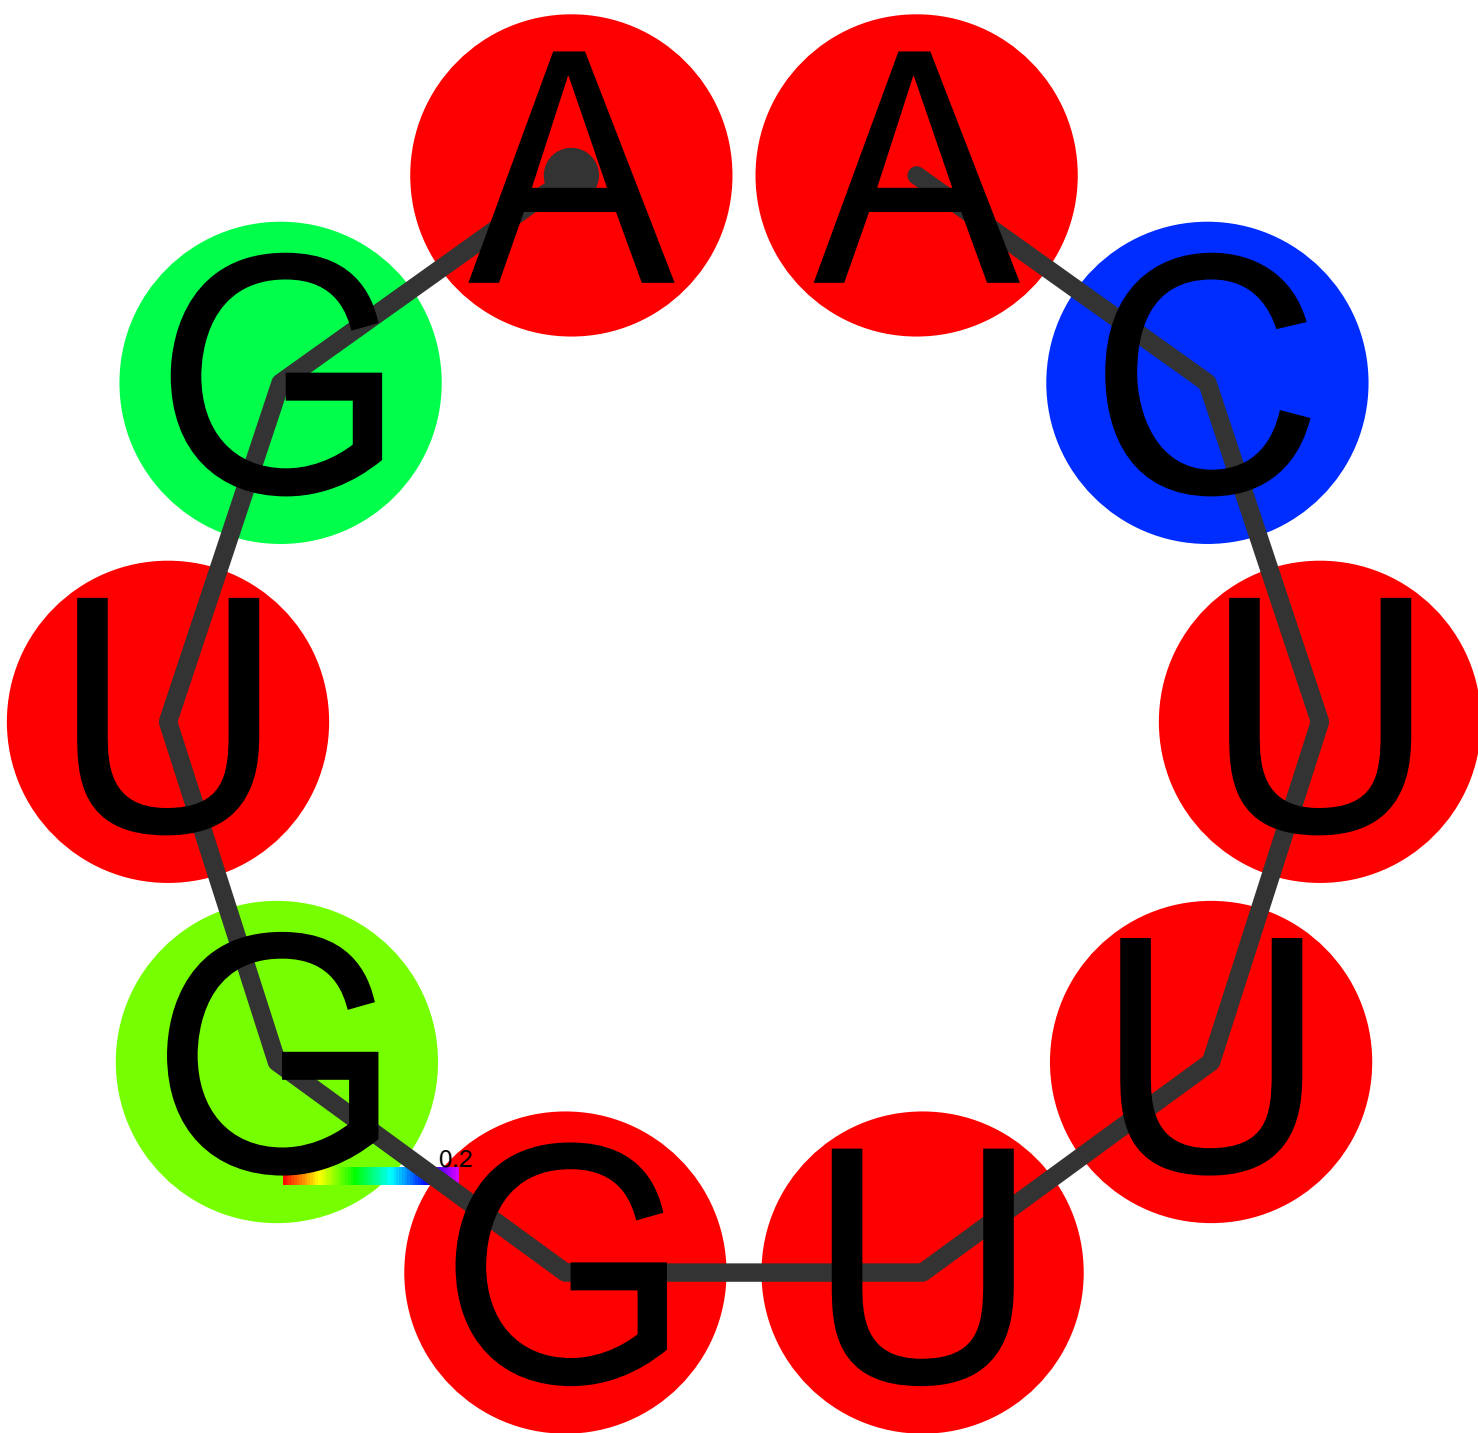

Supplement: Supplementary file 559 [file supplementary]

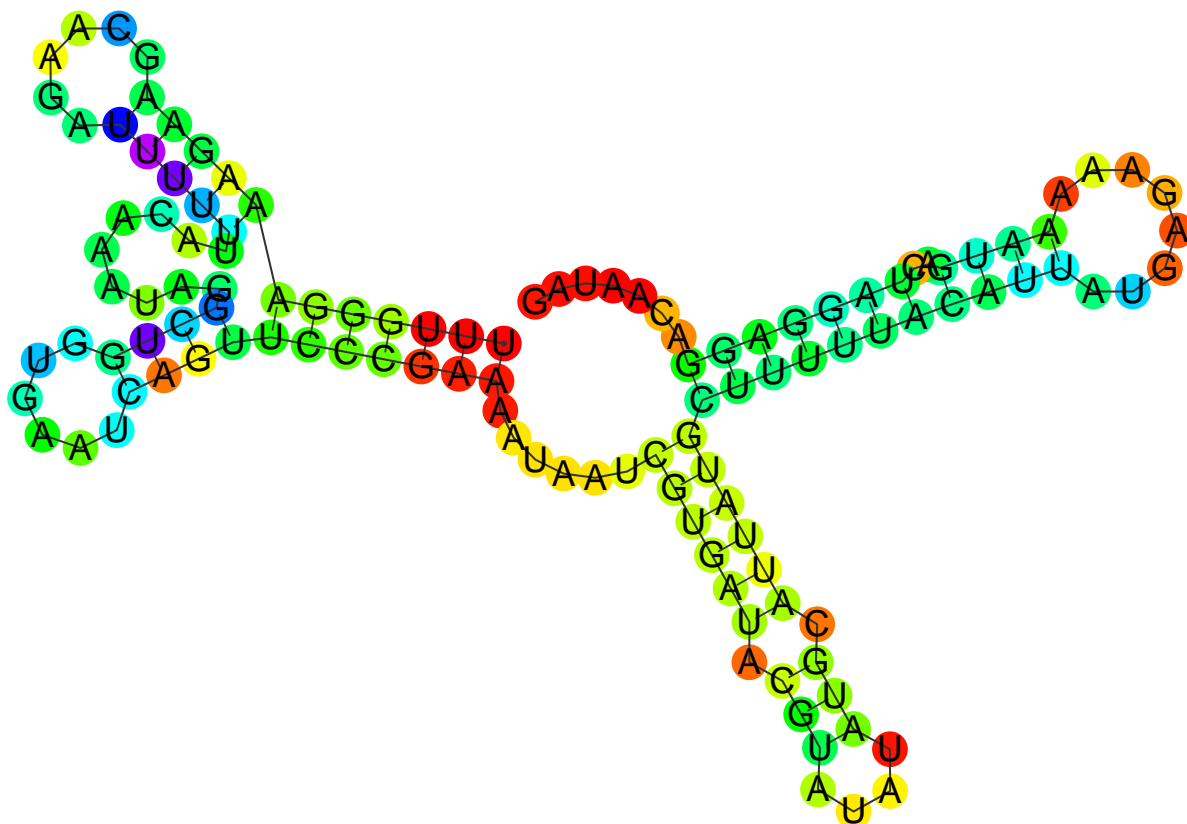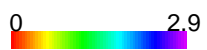

Supplement: Supplementary file 560 [file supplementary]

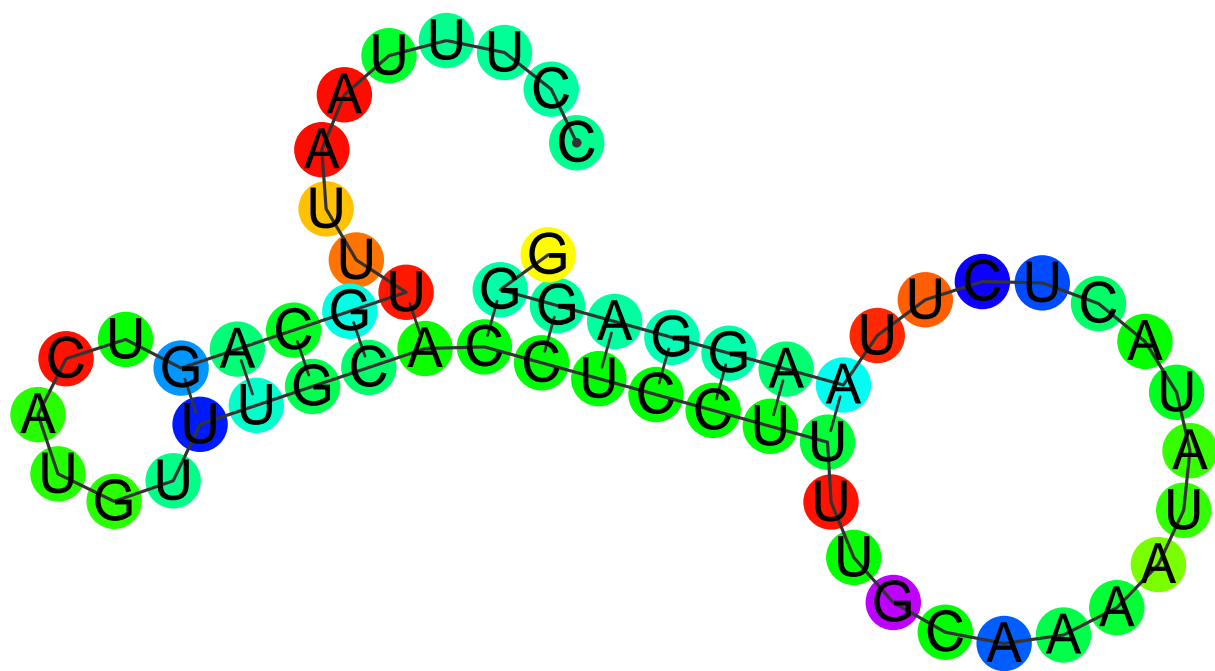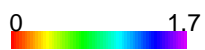

Supplement: Supplementary file 561 [file supplementary]

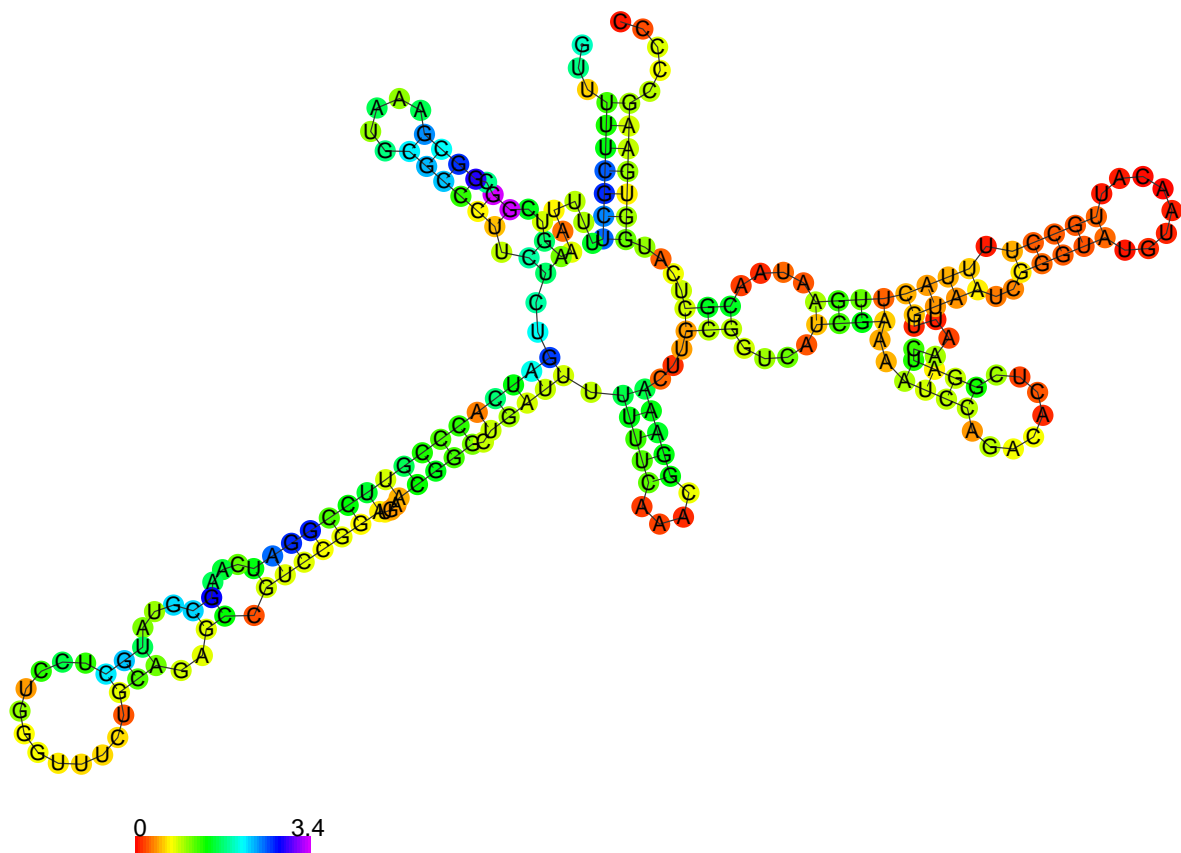

Supplement: Supplementary file 562 [file supplementary]

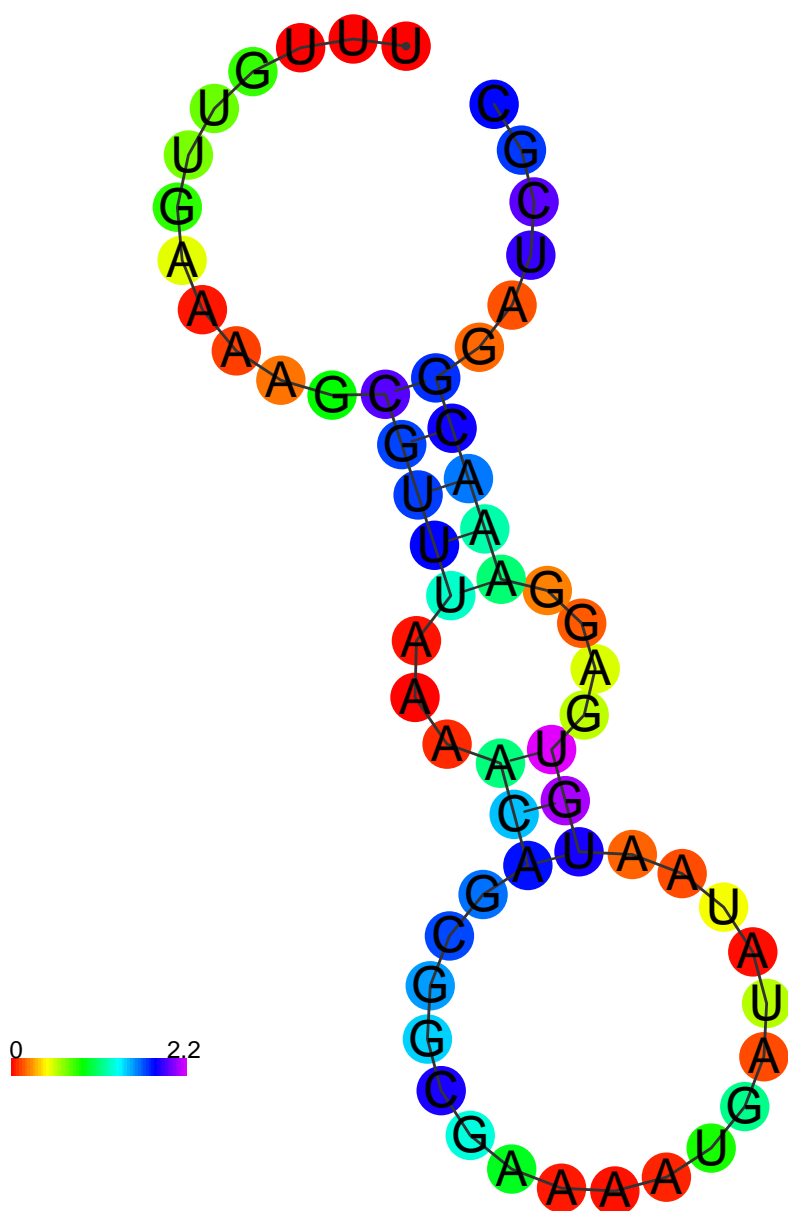

Supplement: Supplementary file 563 [file supplementary]

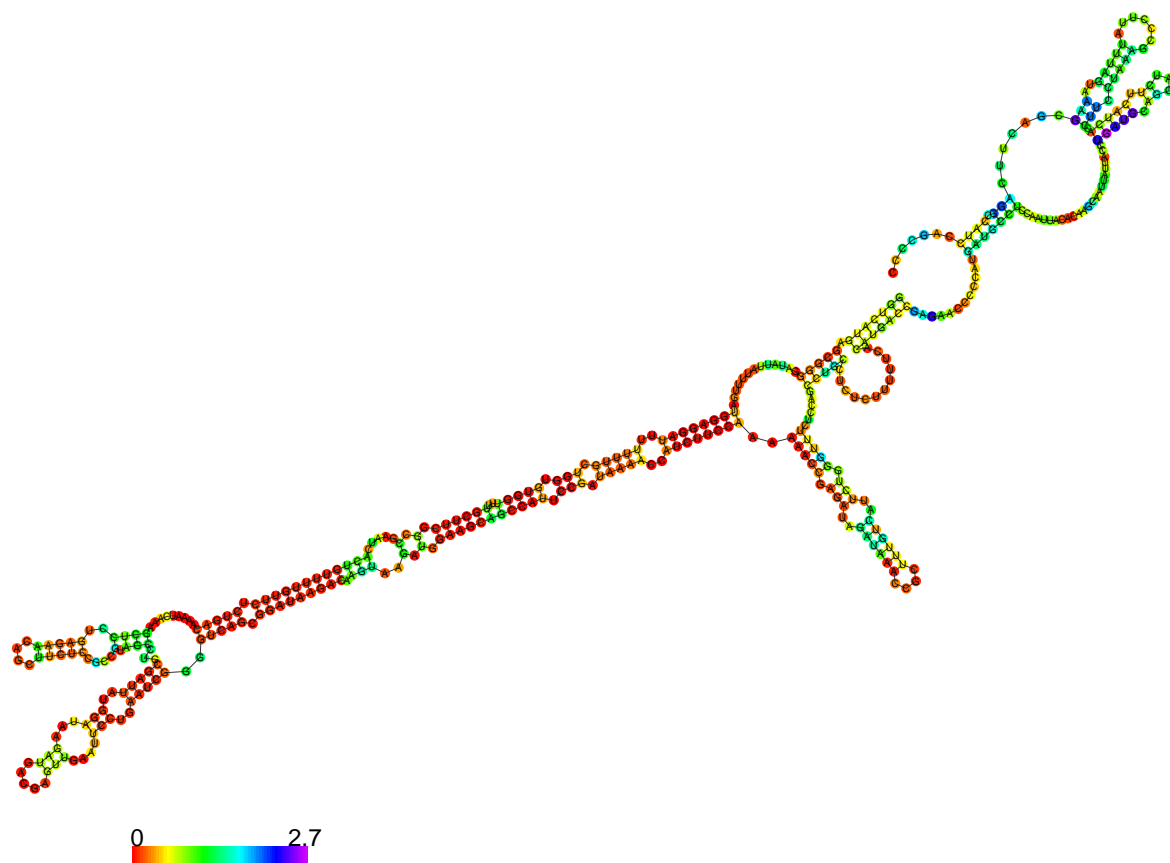

Supplement: Supplementary file 564 [file supplementary]

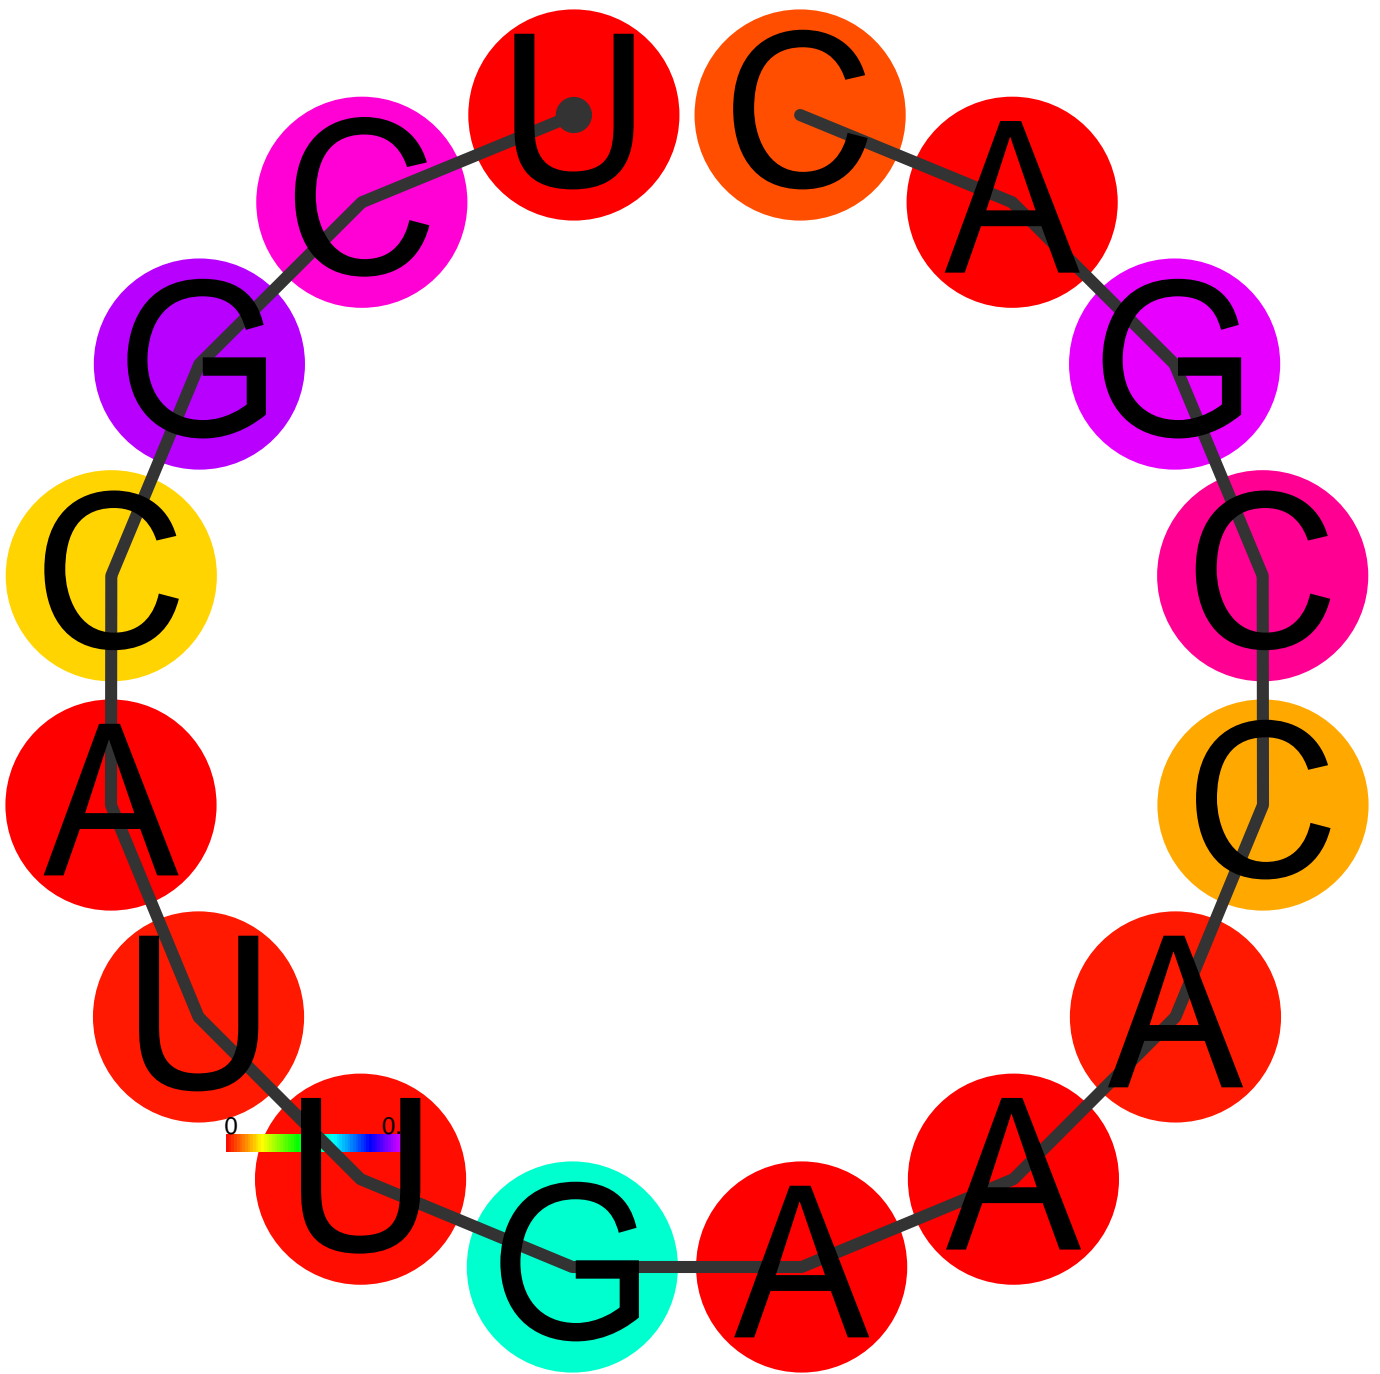

Supplement: Supplementary file 565 [file supplementary]

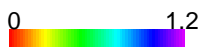

Supplement: Supplementary file 566 [file supplementary]

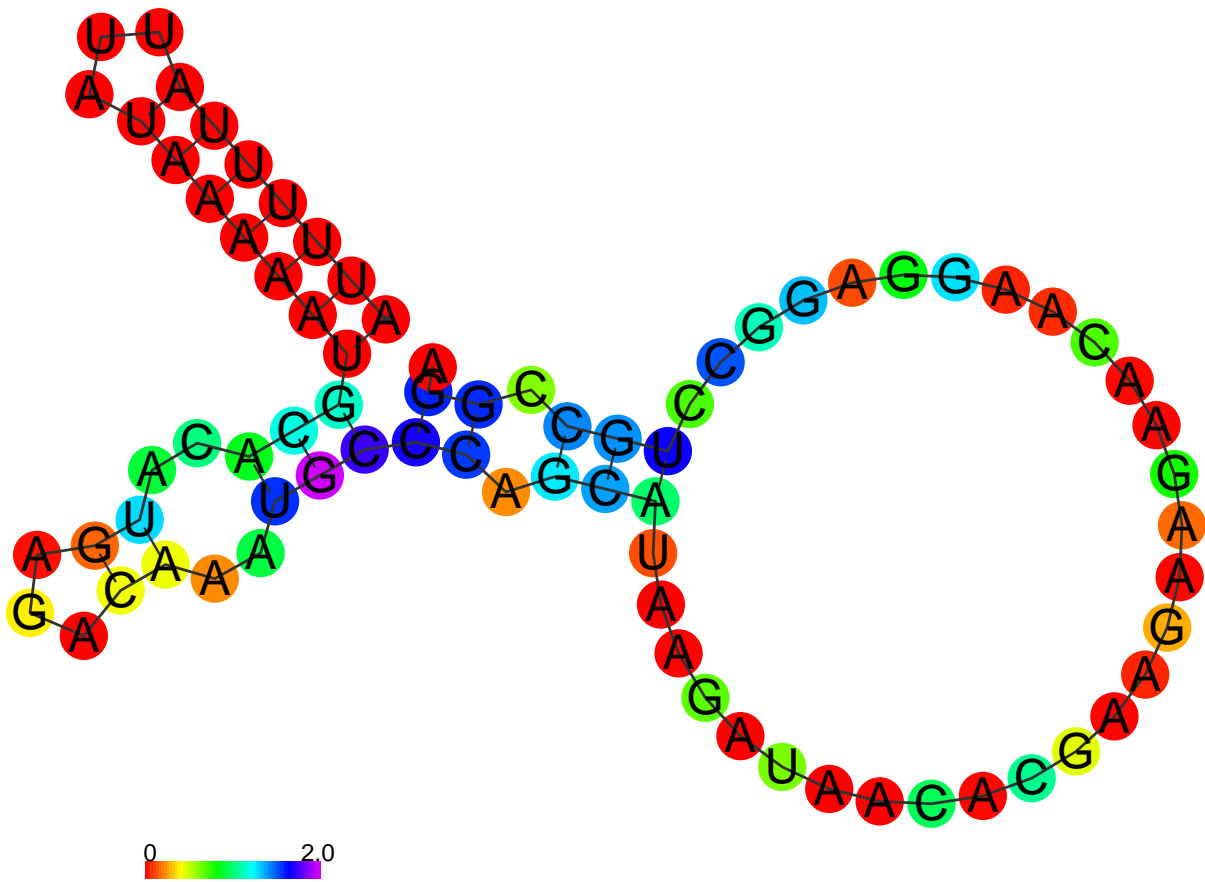

Supplement: Supplementary file 567 [file supplementary]

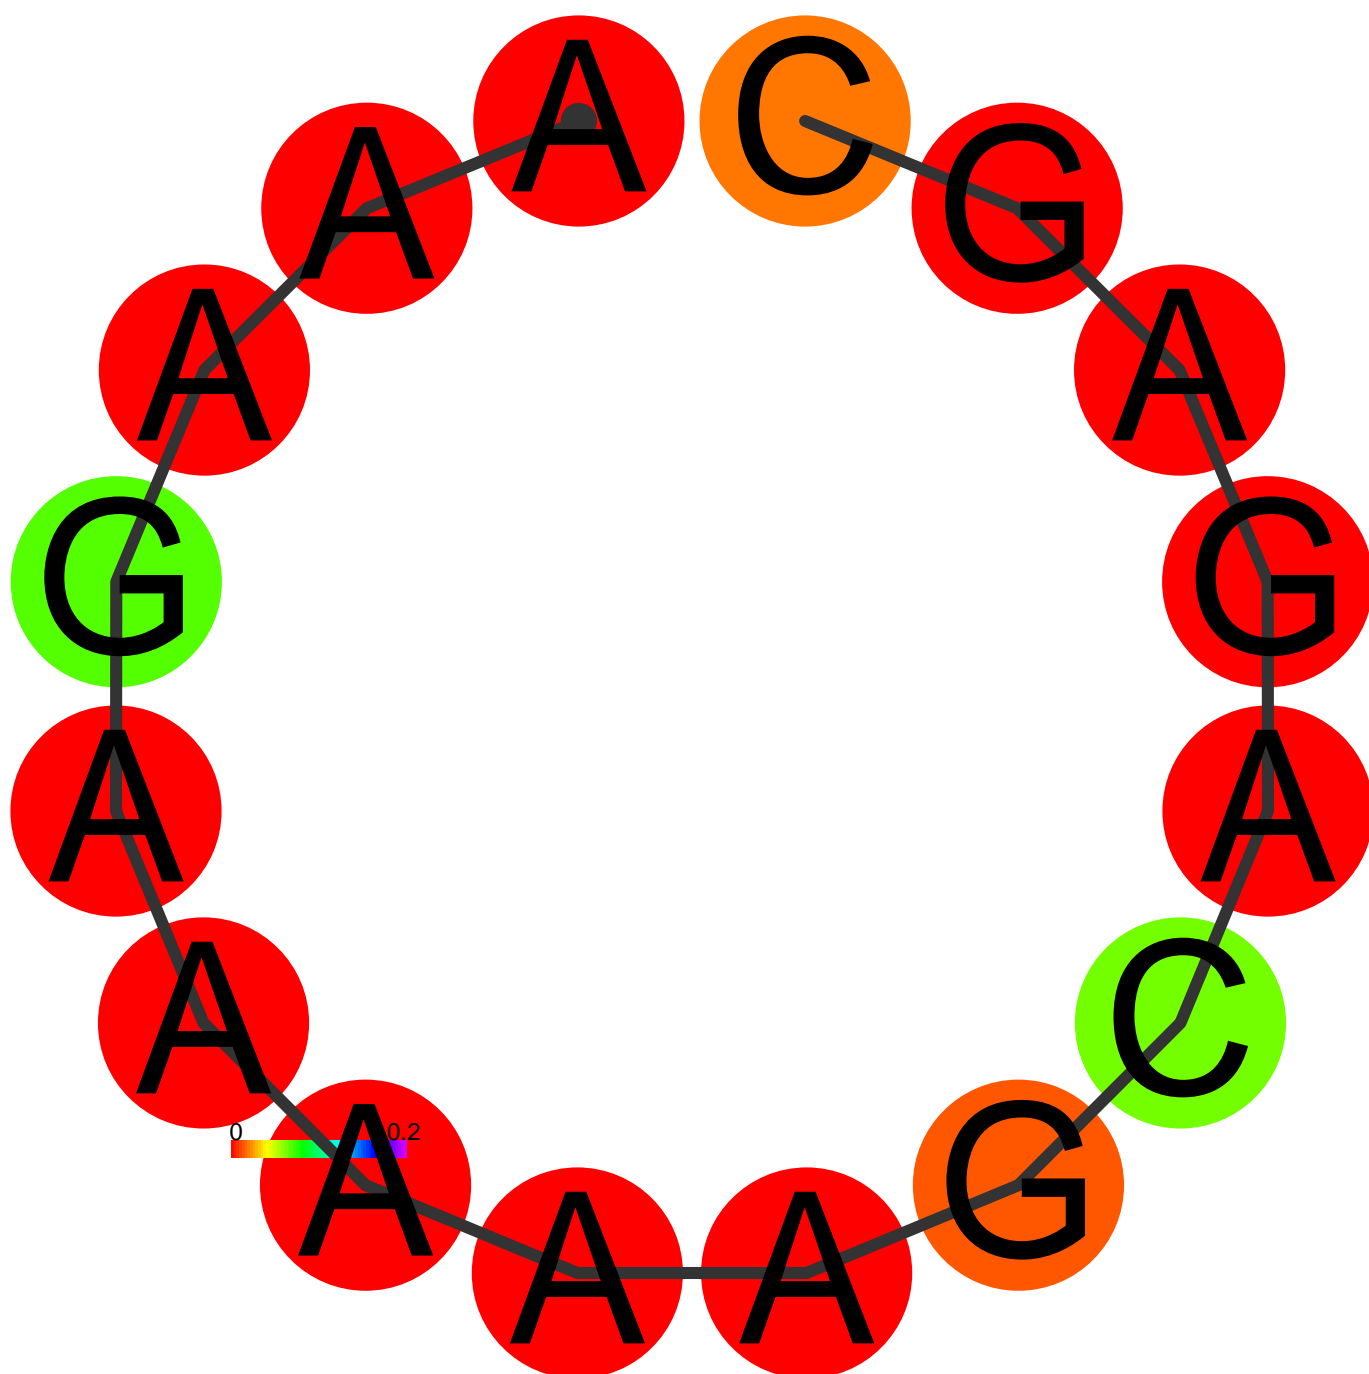

Supplement: Supplementary file 568 [file supplementary]

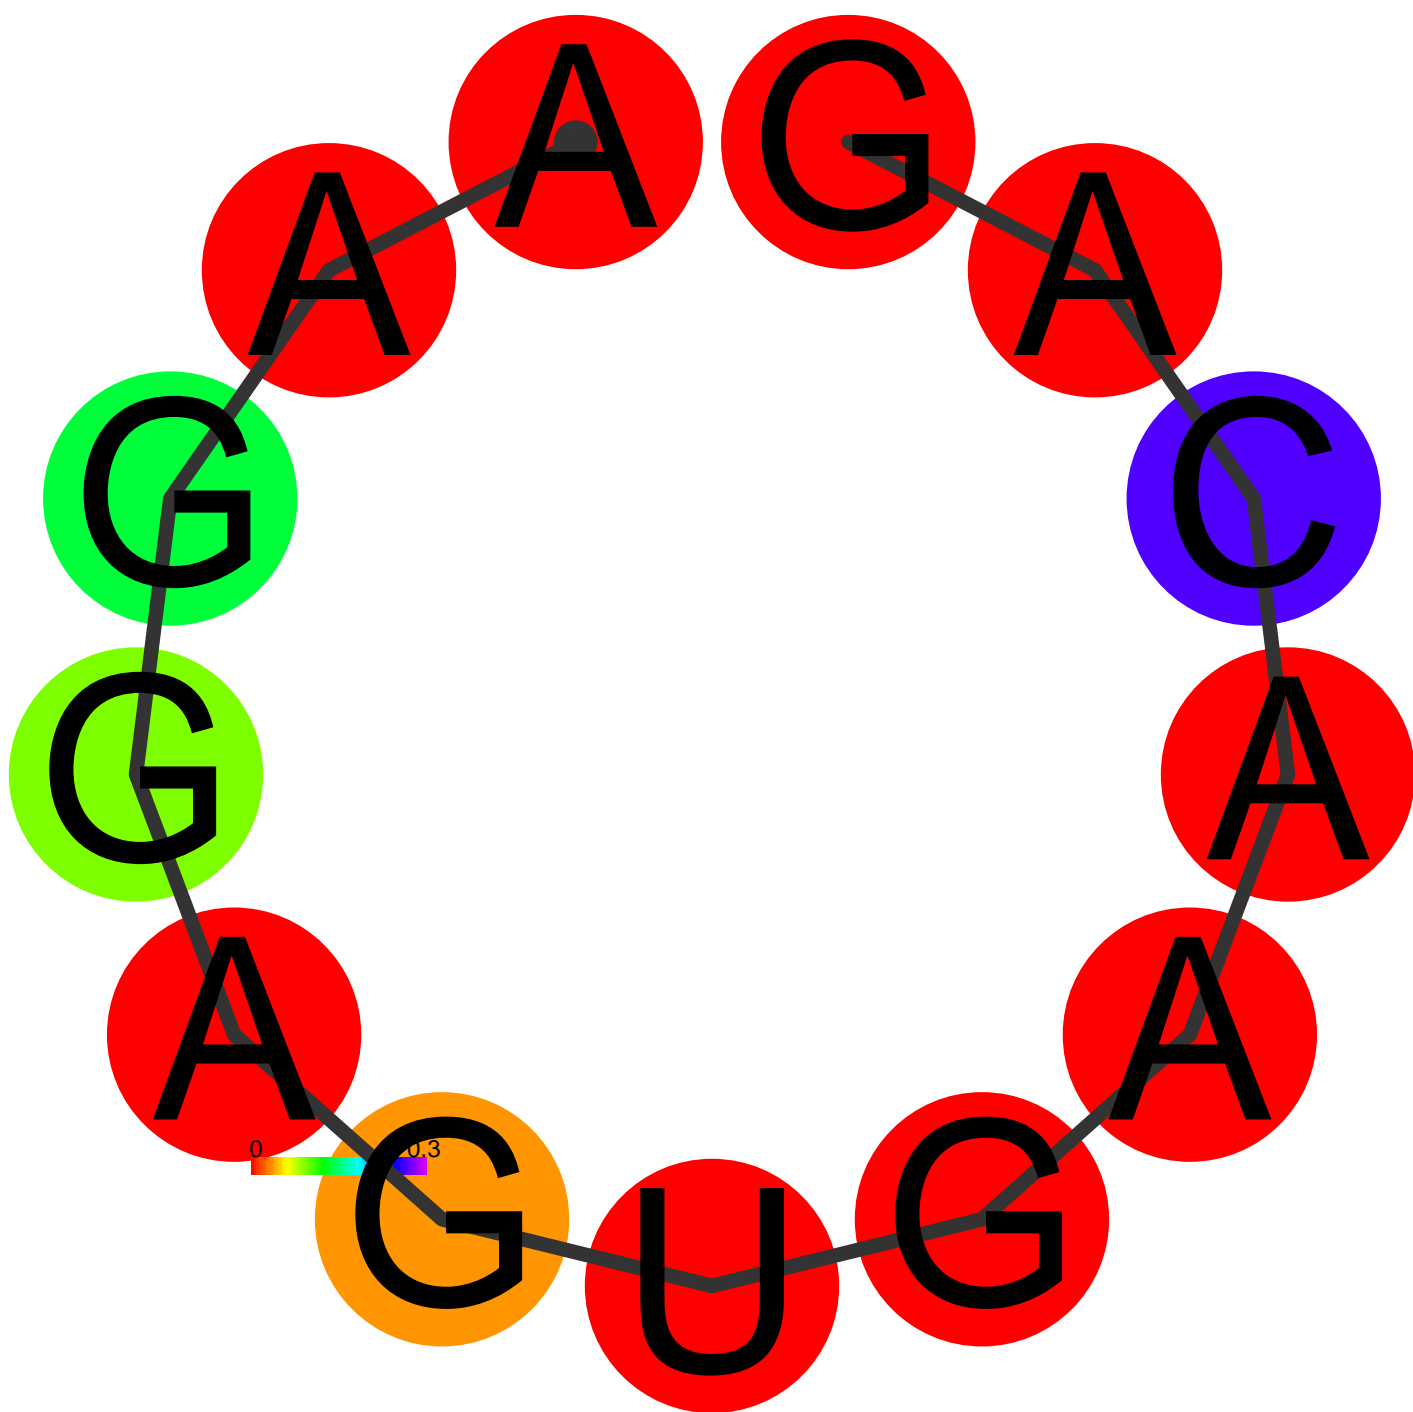

Supplement: Supplementary file 569 [file supplementary]

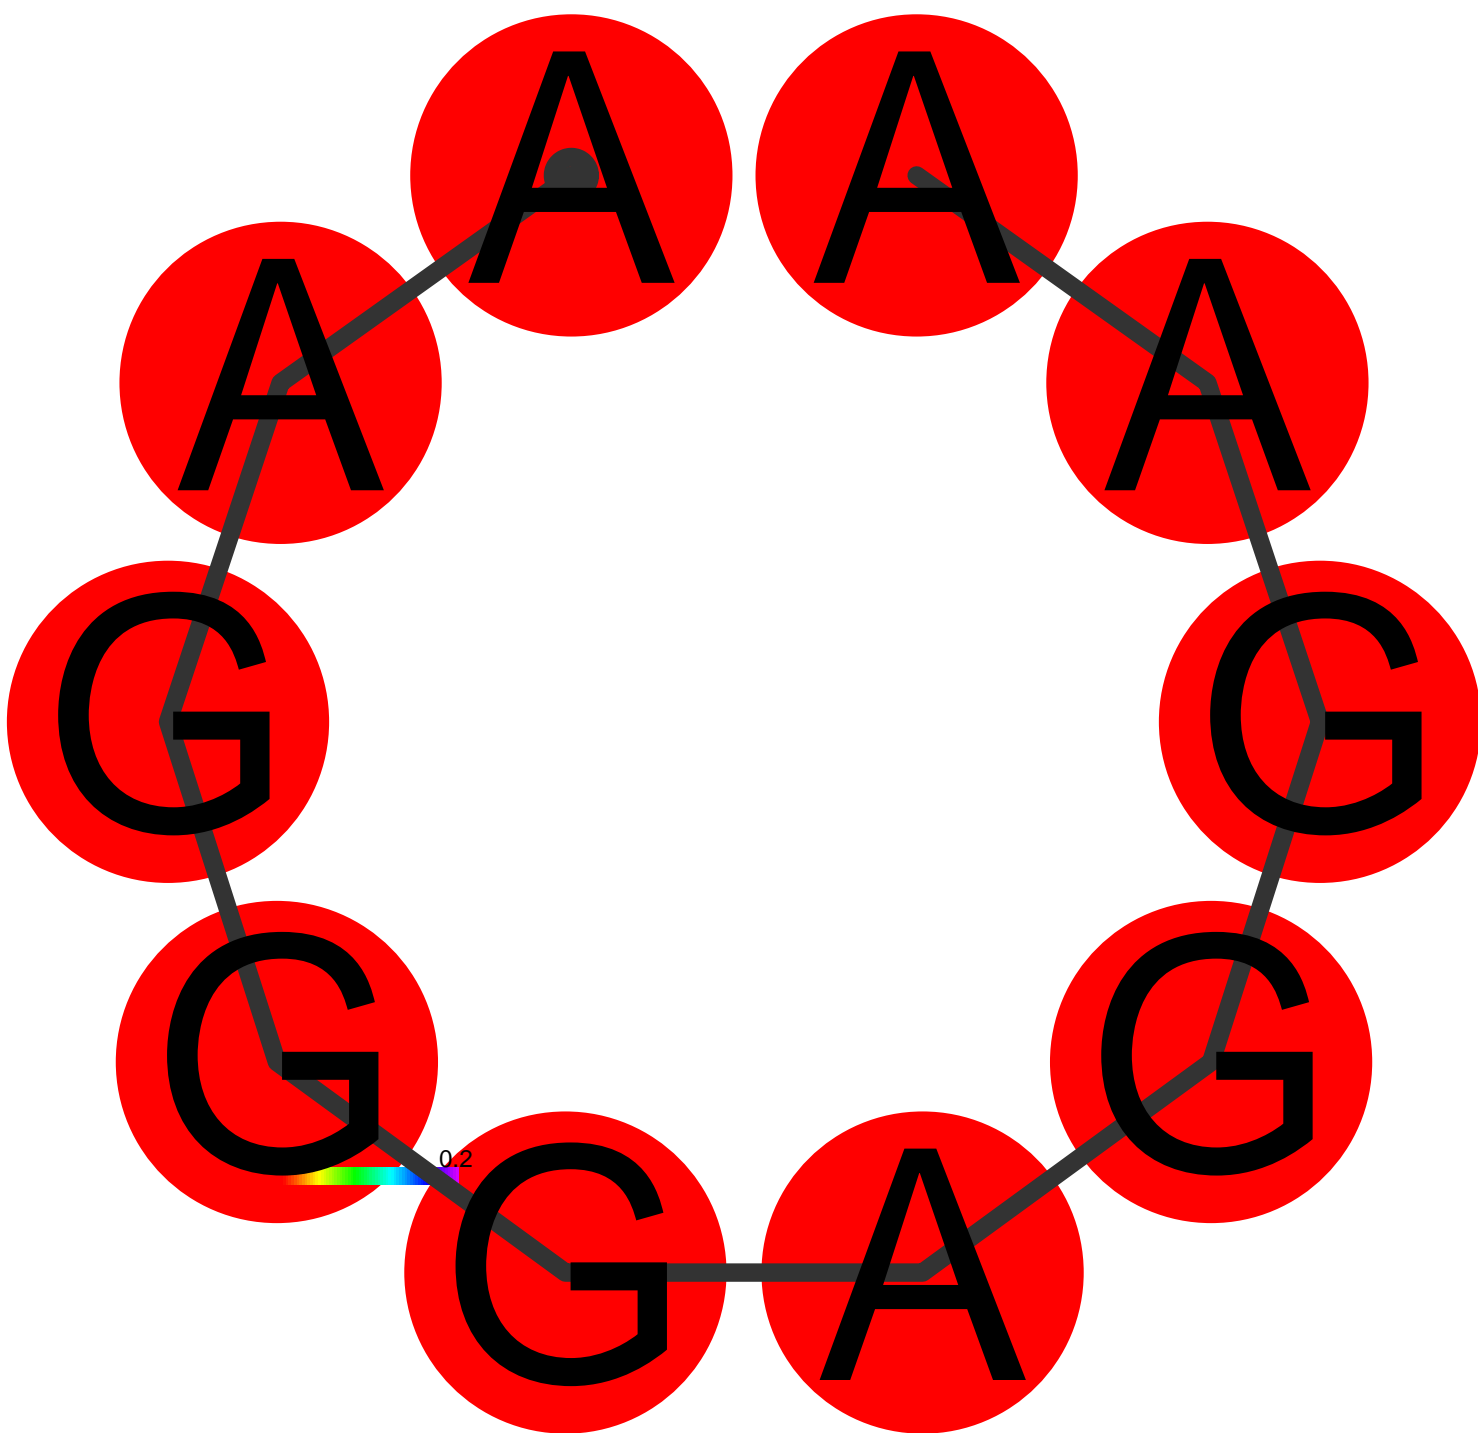

Supplement: Supplementary file 570 [file supplementary]

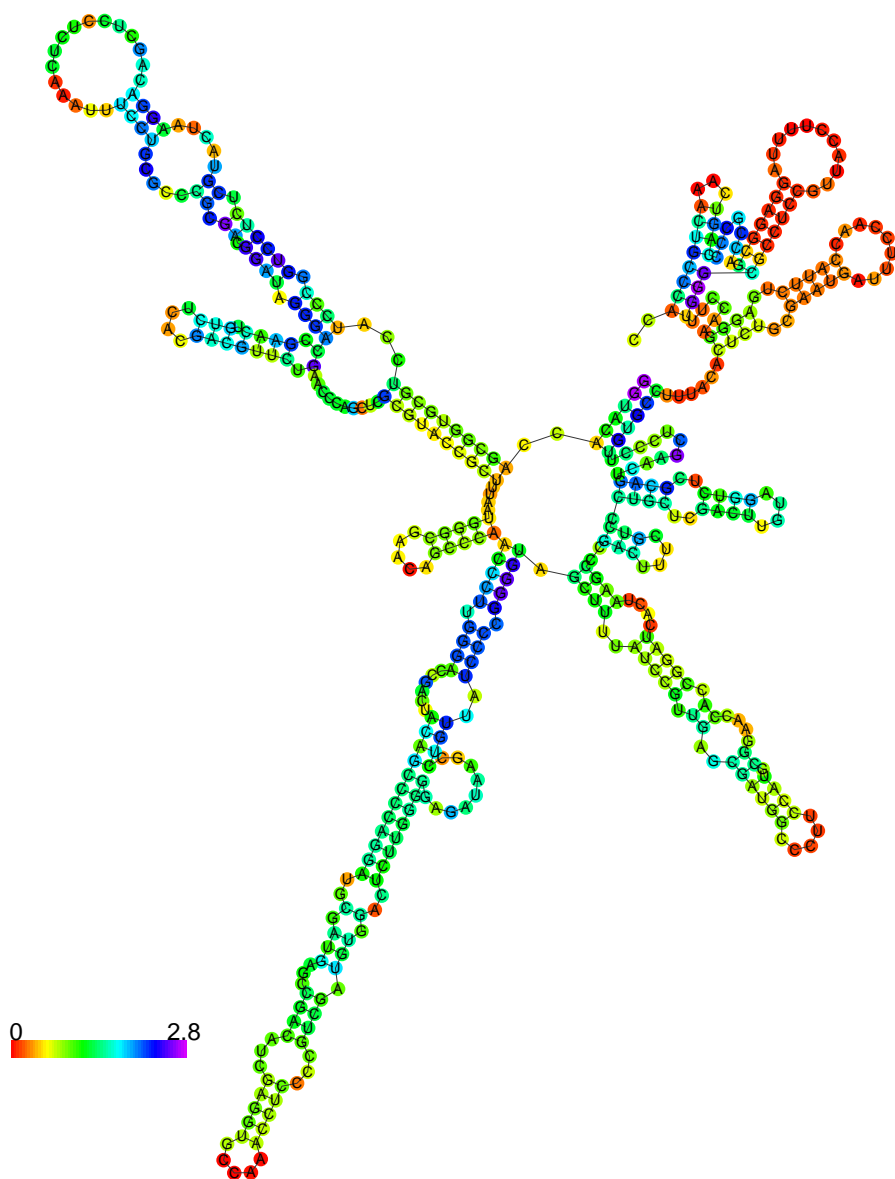

Supplement: Supplementary file 571 [file supplementary]

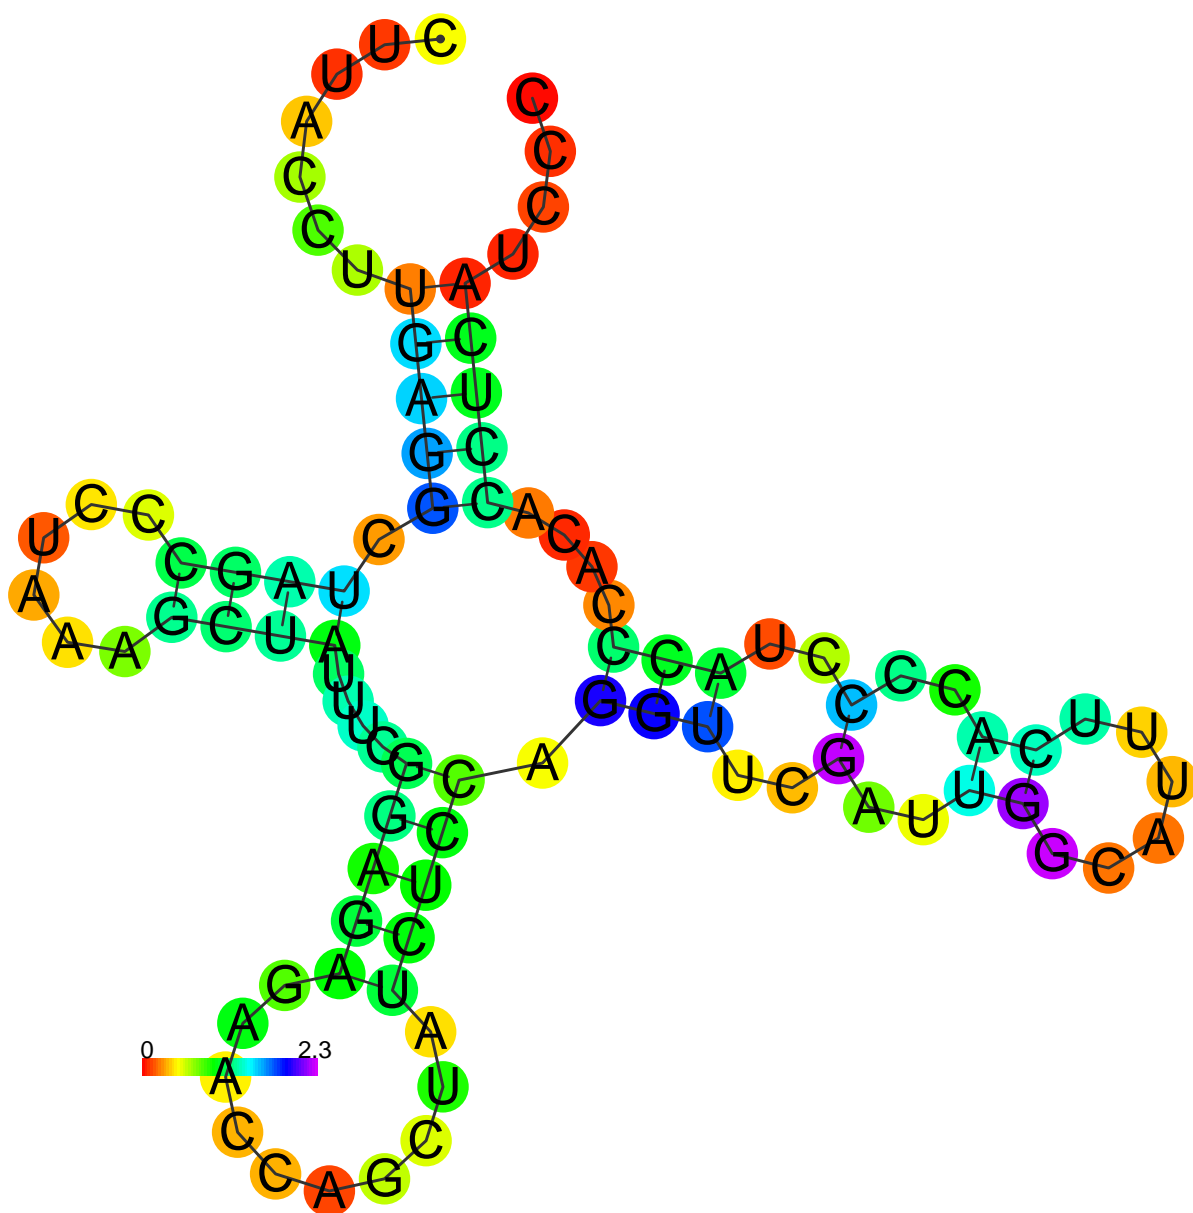

Supplement: Supplementary file 572 [file supplementary]

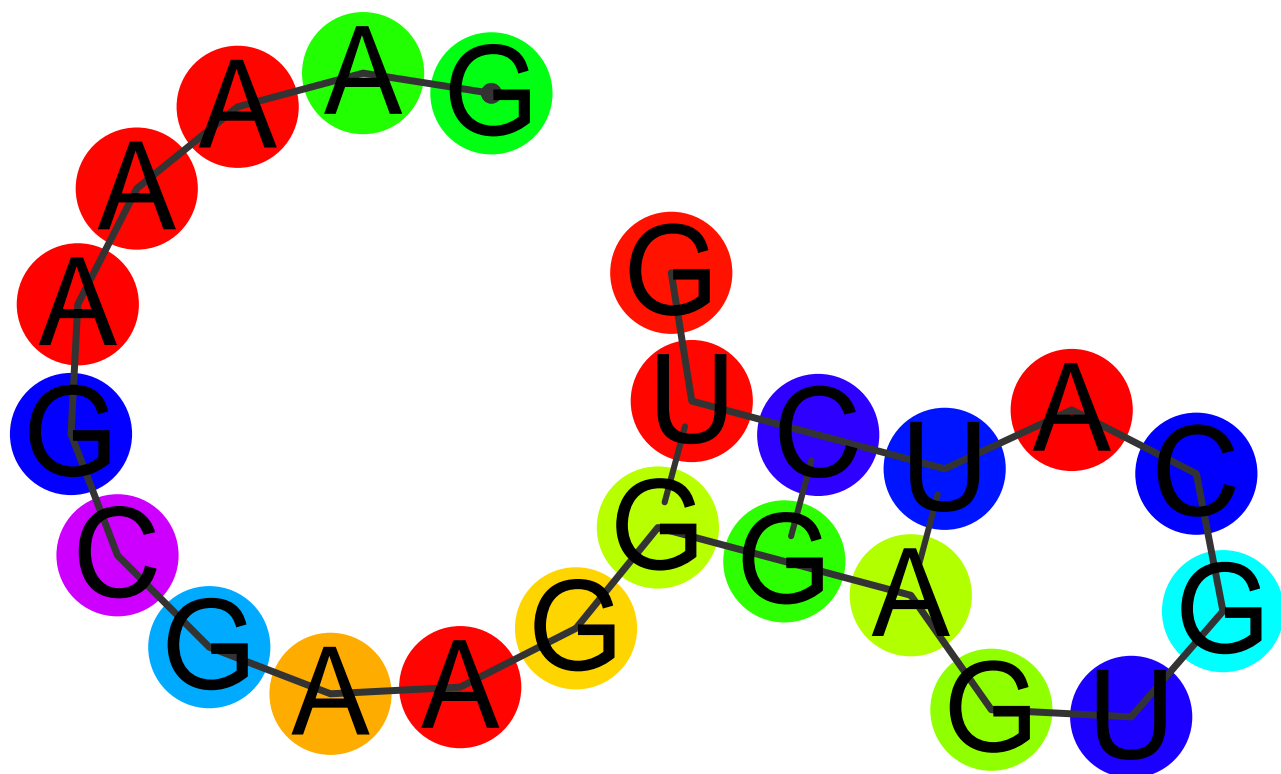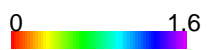

Supplement: Supplementary file 573 [file supplementary]



Supplement: Supplementary file 574 [file supplementary]

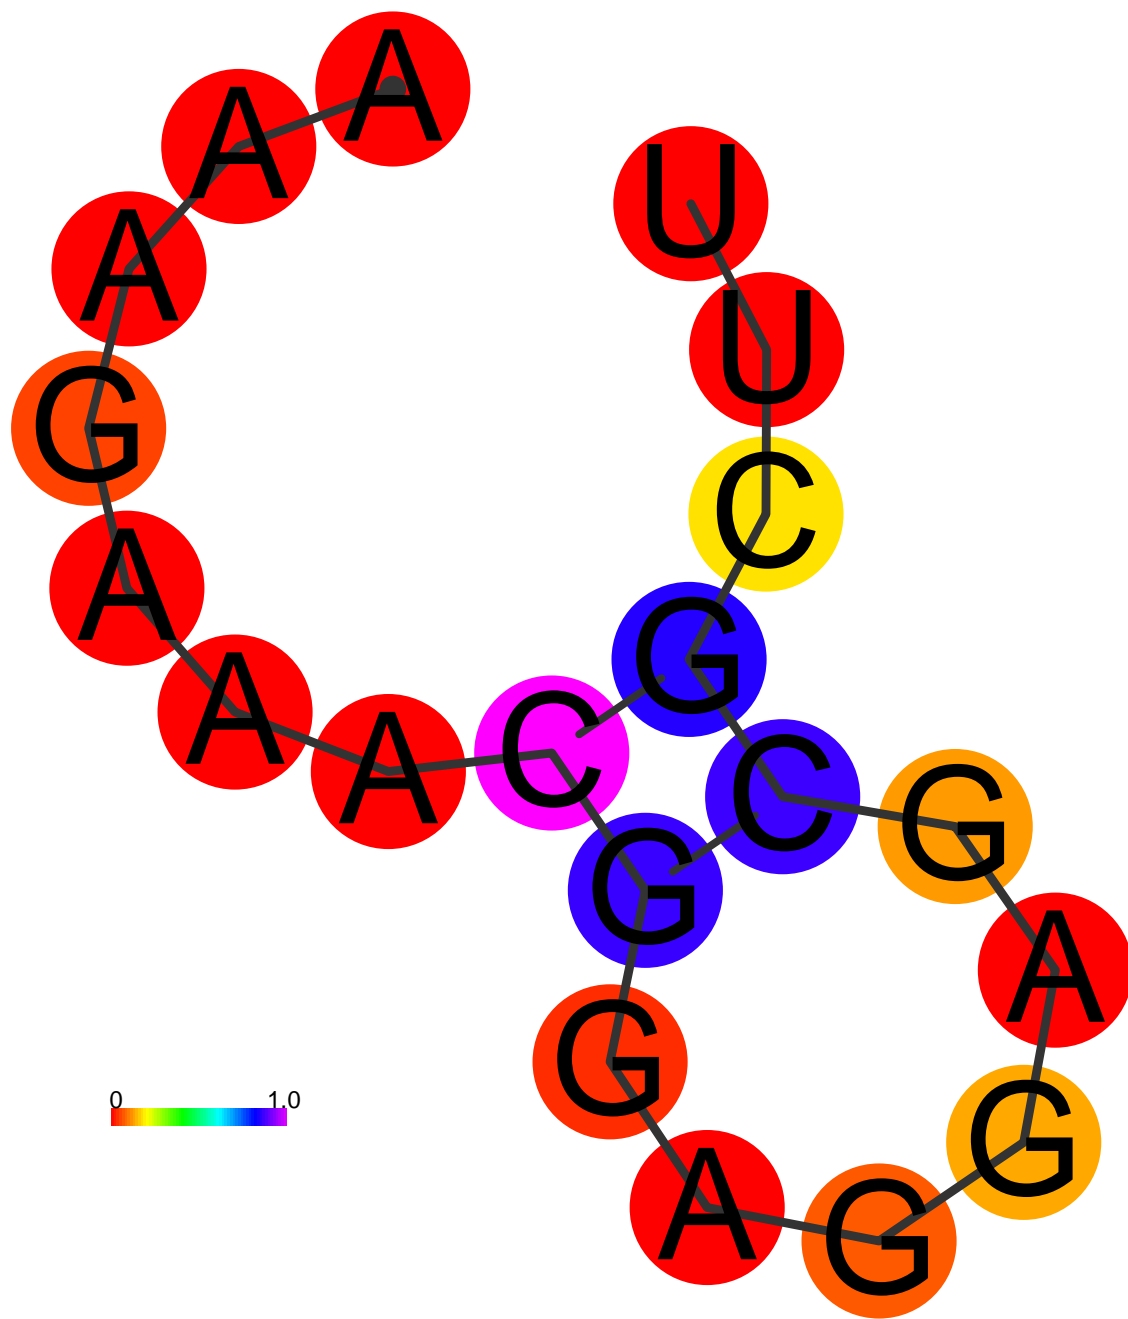

Supplement: Supplementary file 575 [file supplementary]

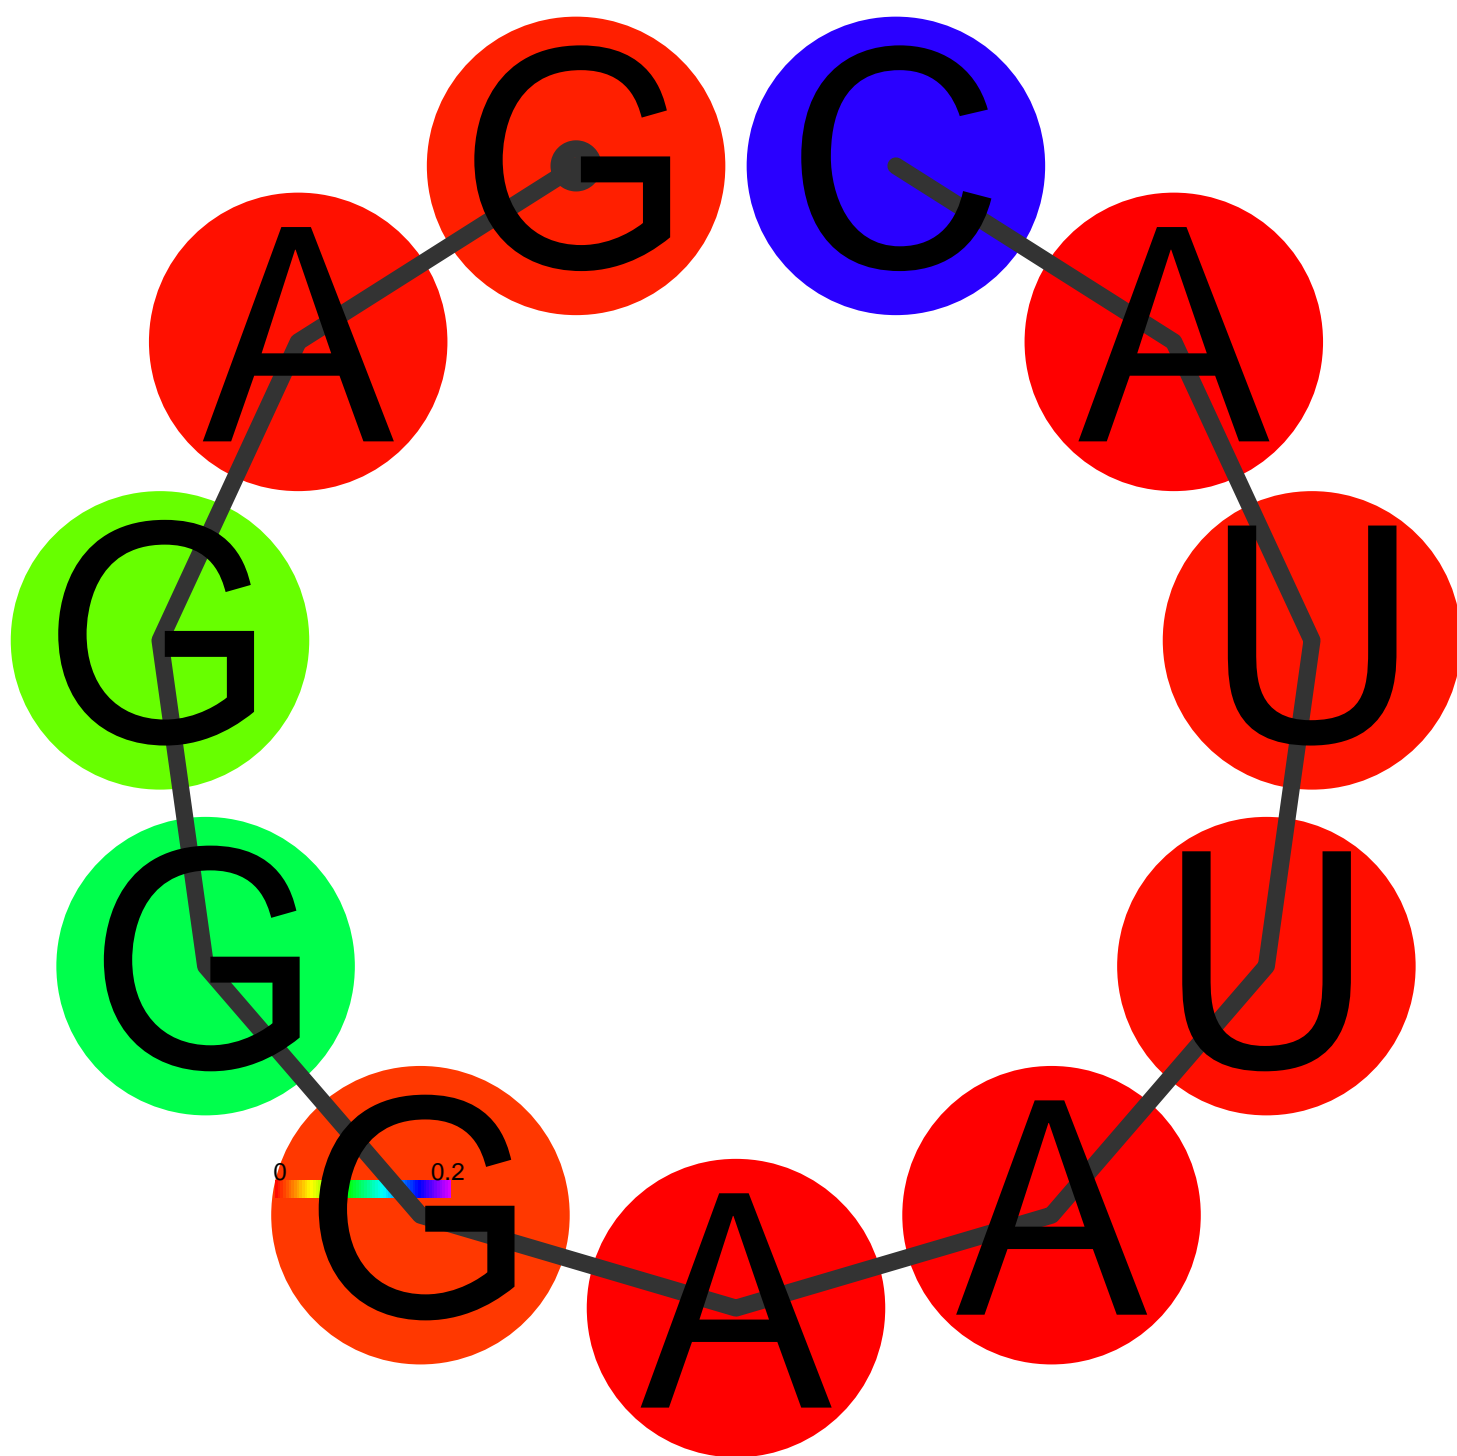

Supplement: Supplementary file 576 [file supplementary]

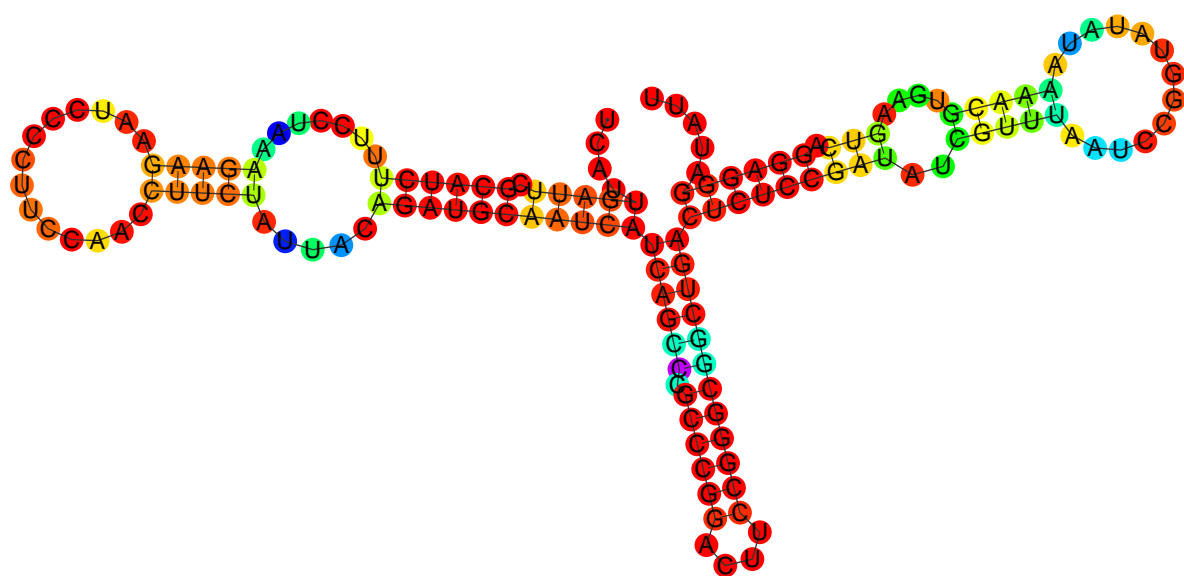

Supplement: Supplementary file 577 [file supplementary]

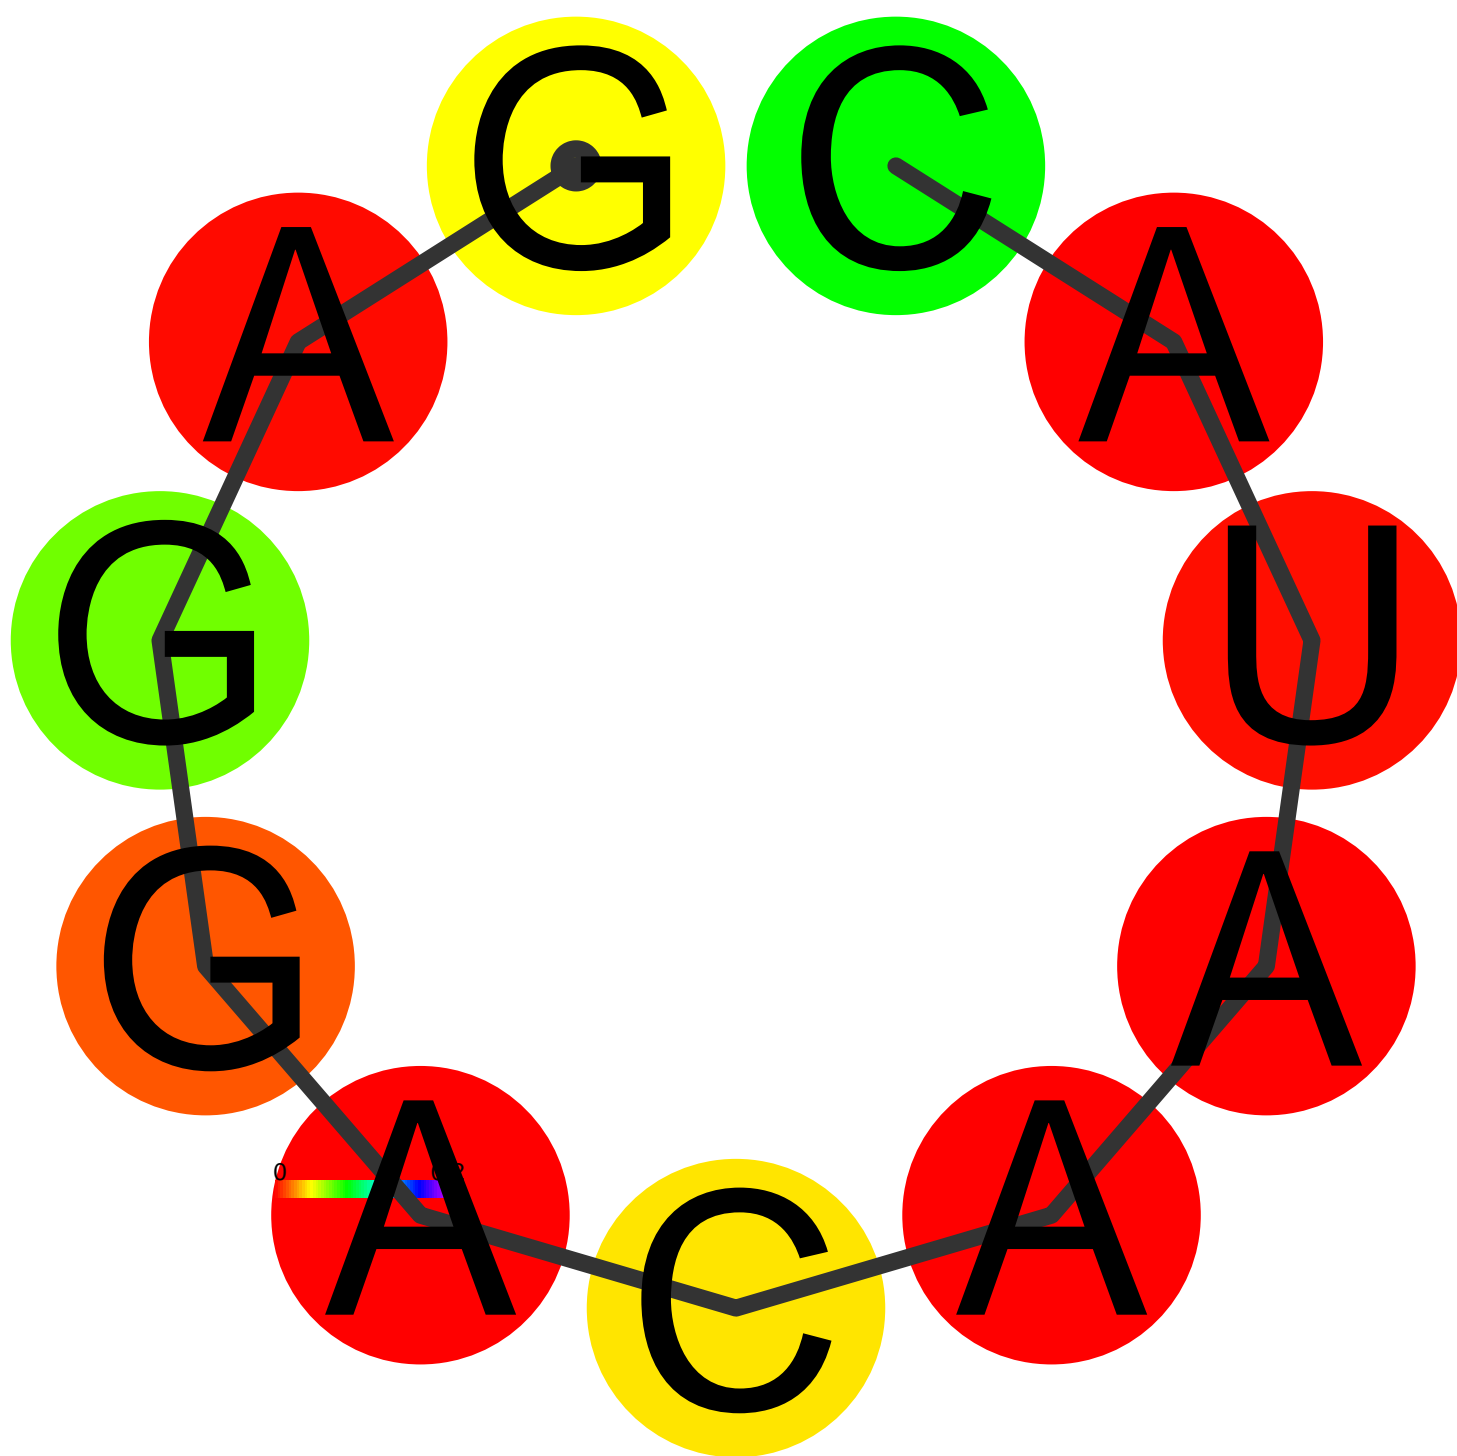

Supplement: Supplementary file 578 [file supplementary]



Supplement: Supplementary file 579 [file supplementary]

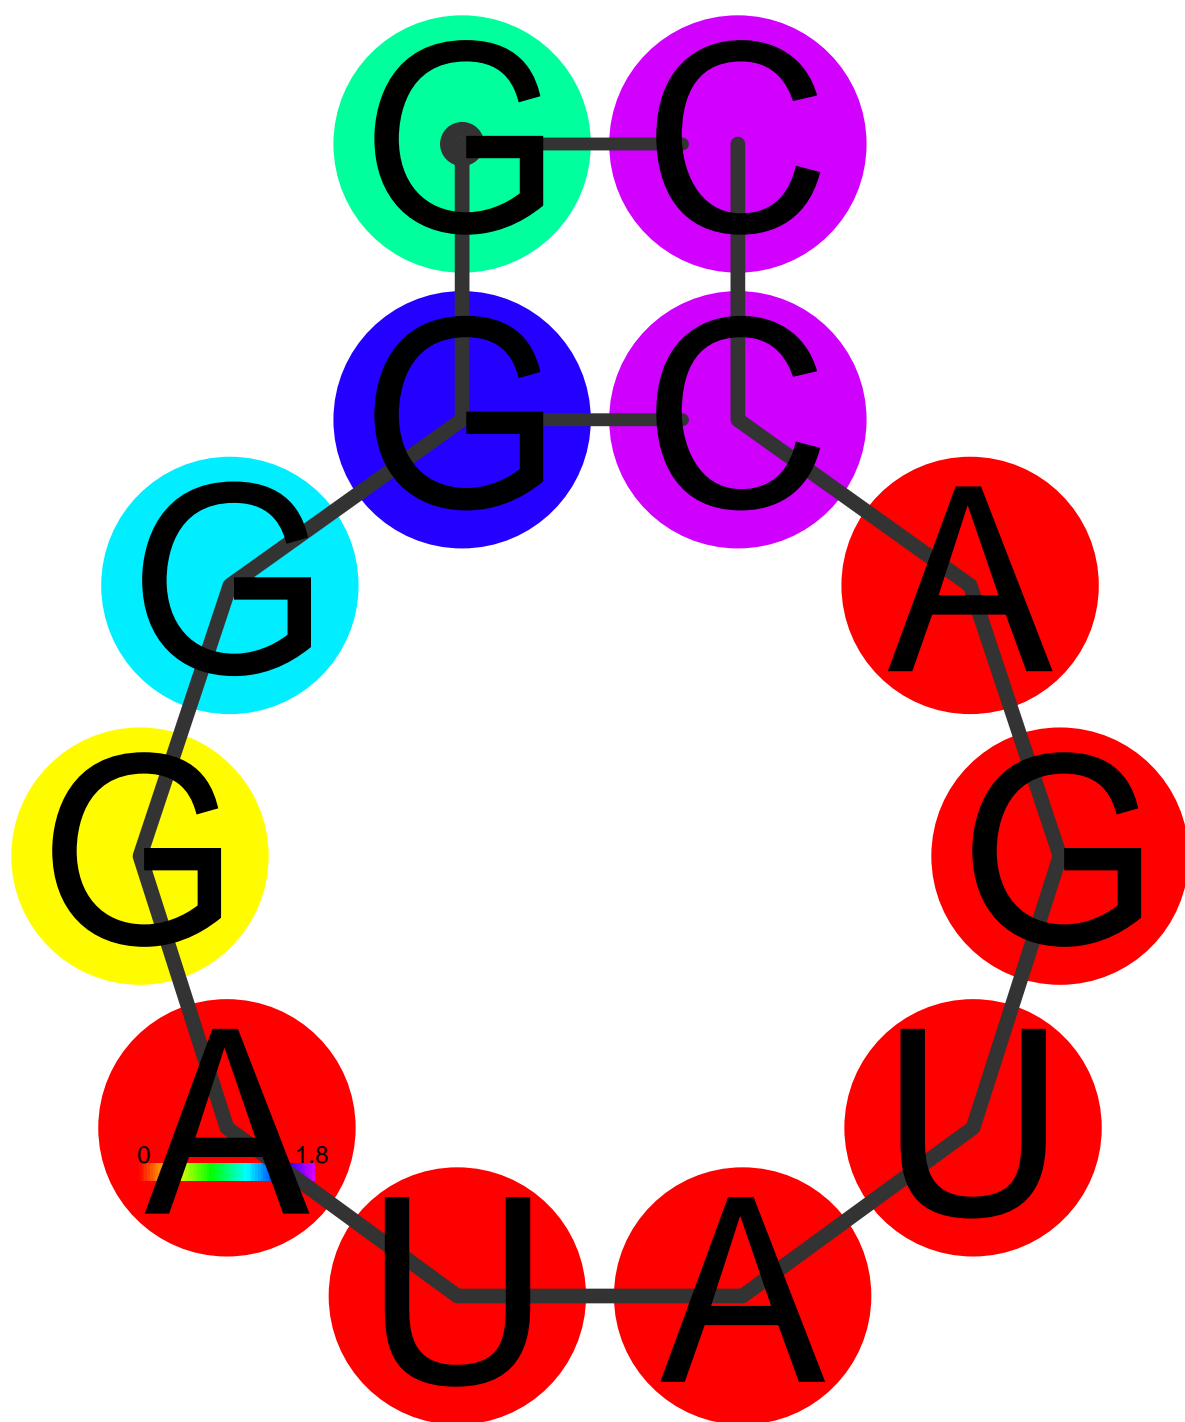

Supplement: Supplementary file 580 [file supplementary]

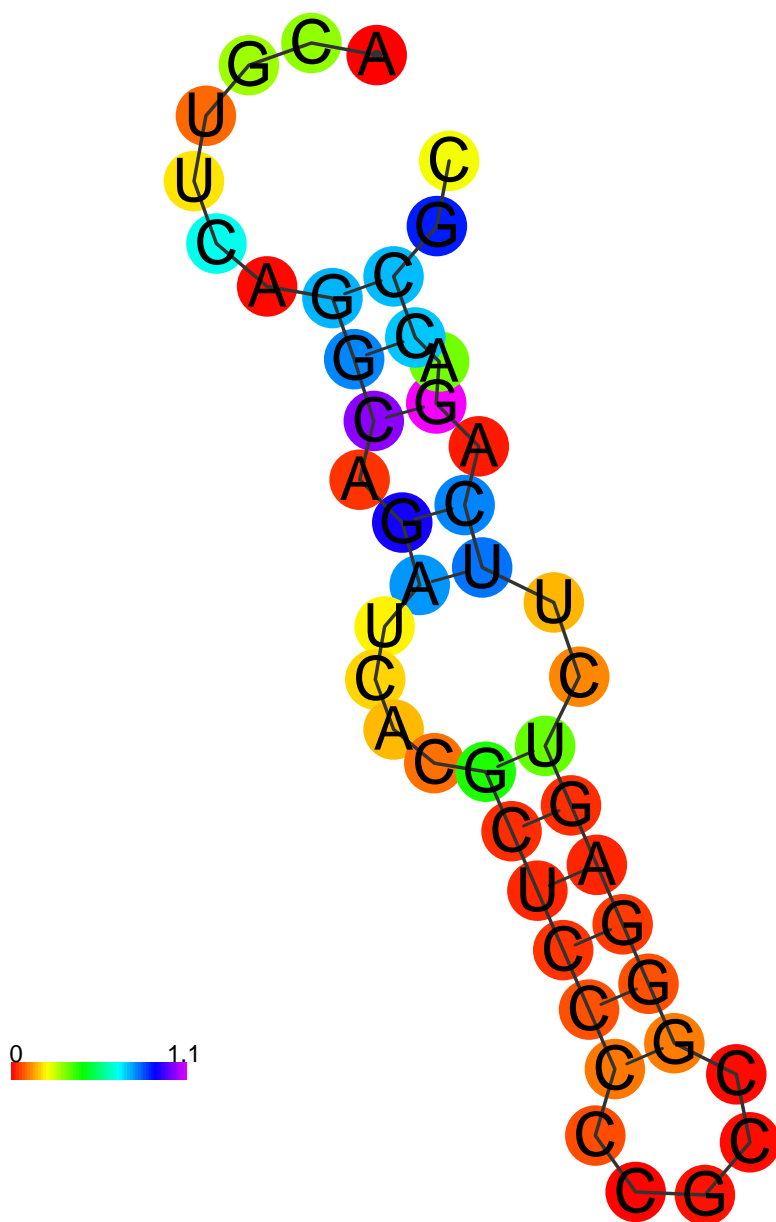

Supplement: Supplementary file 581 [file supplementary]

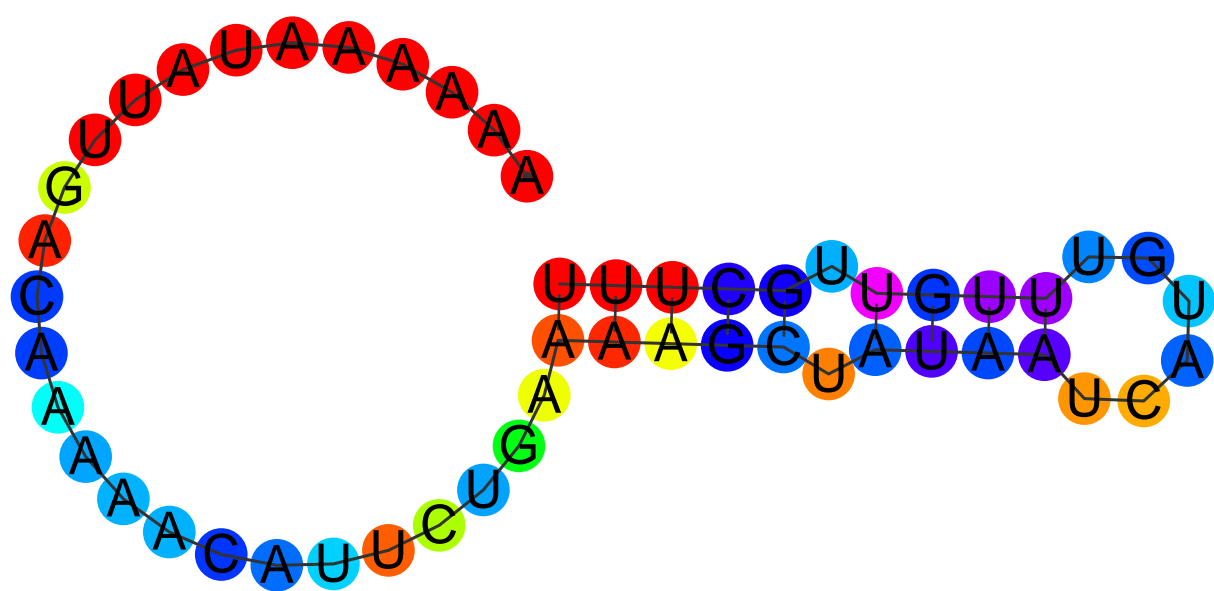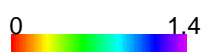

Supplement: Supplementary file 582 [file supplementary]

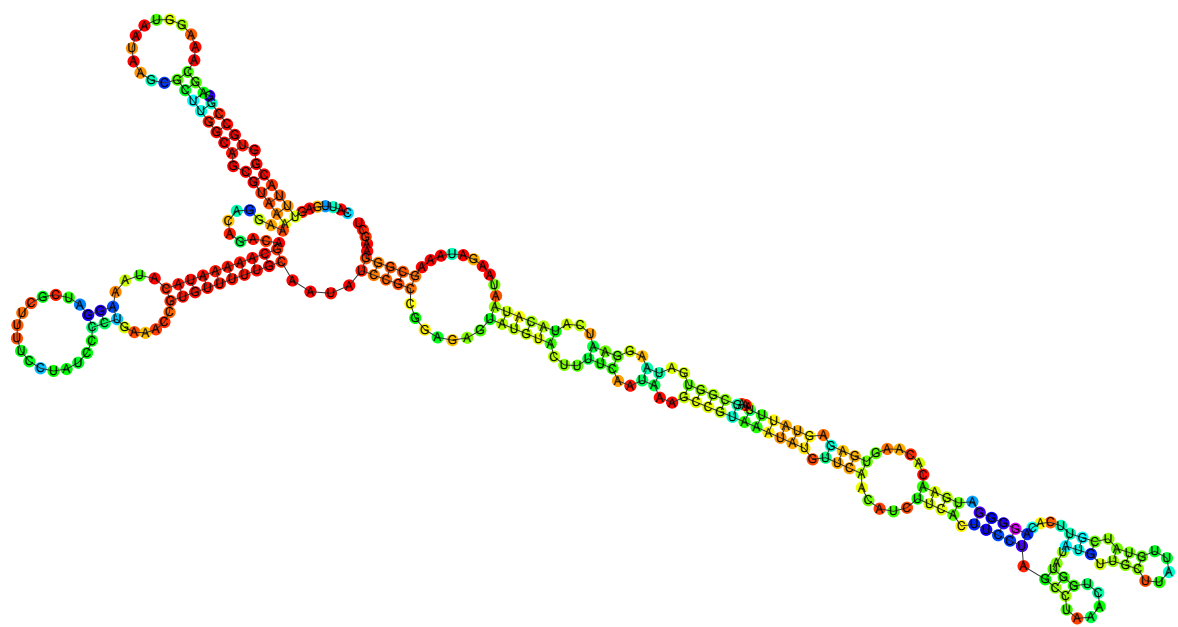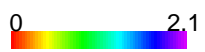

Supplement: Supplementary file 583 [file supplementary]

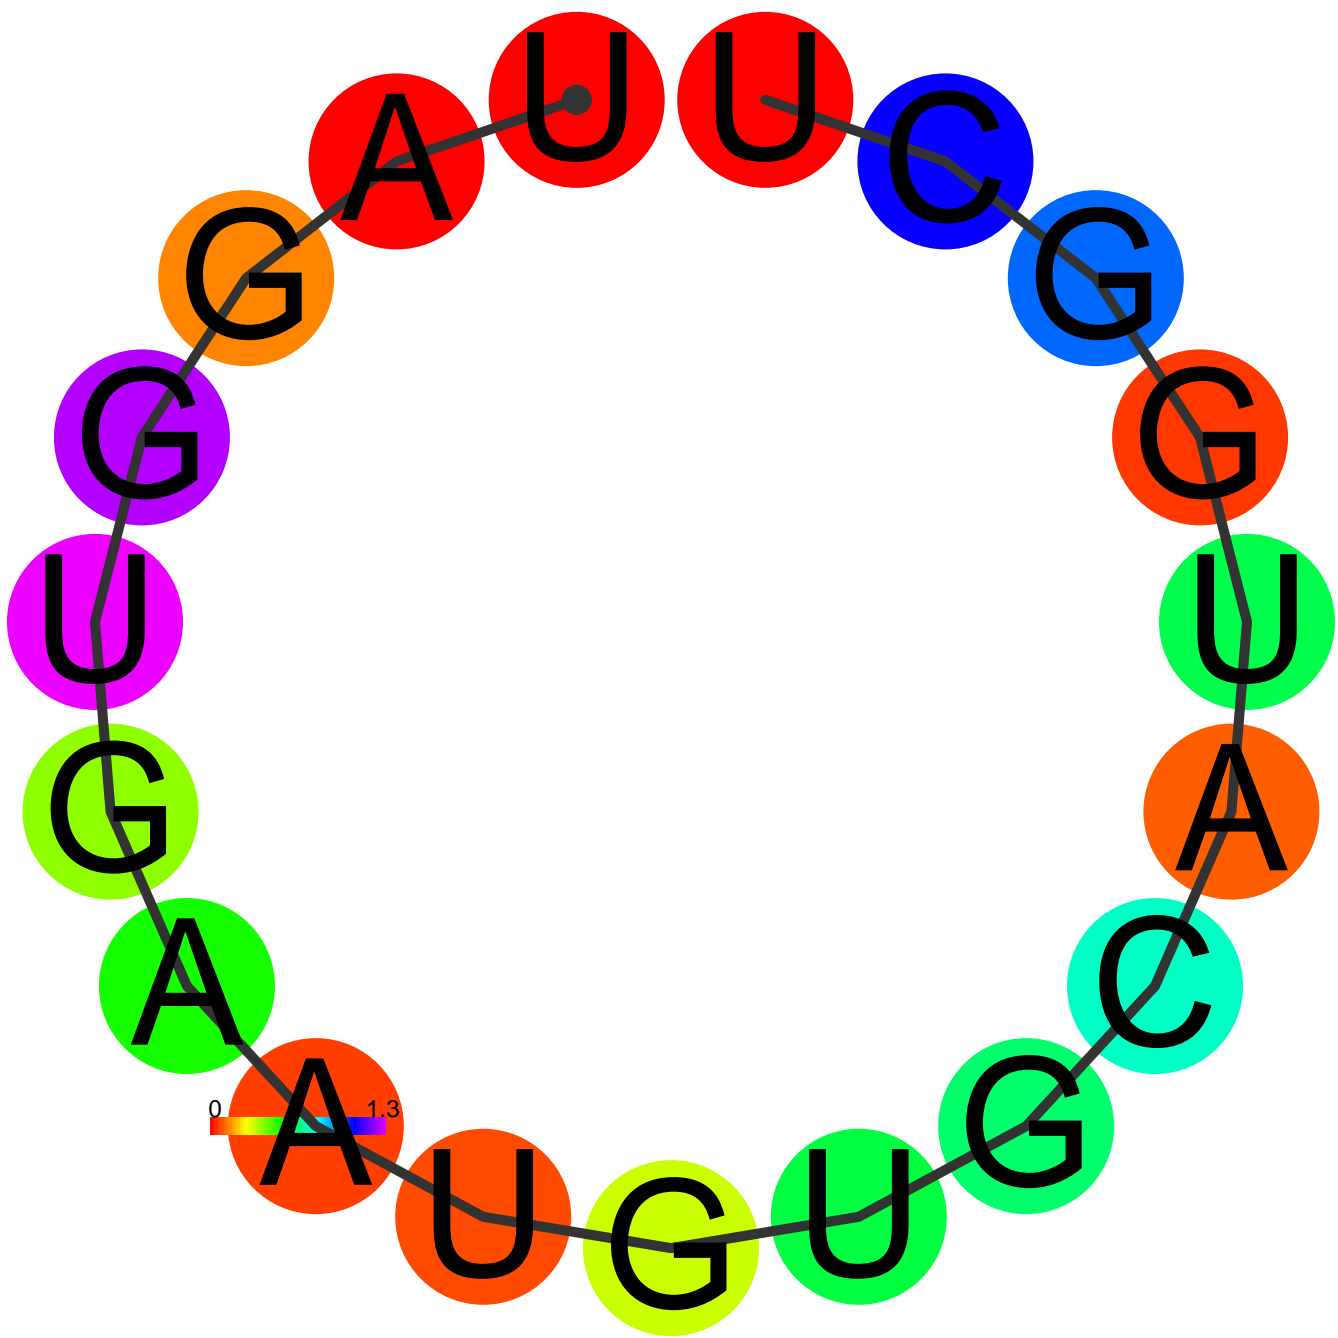

Supplement: Supplementary file 584 [file supplementary]

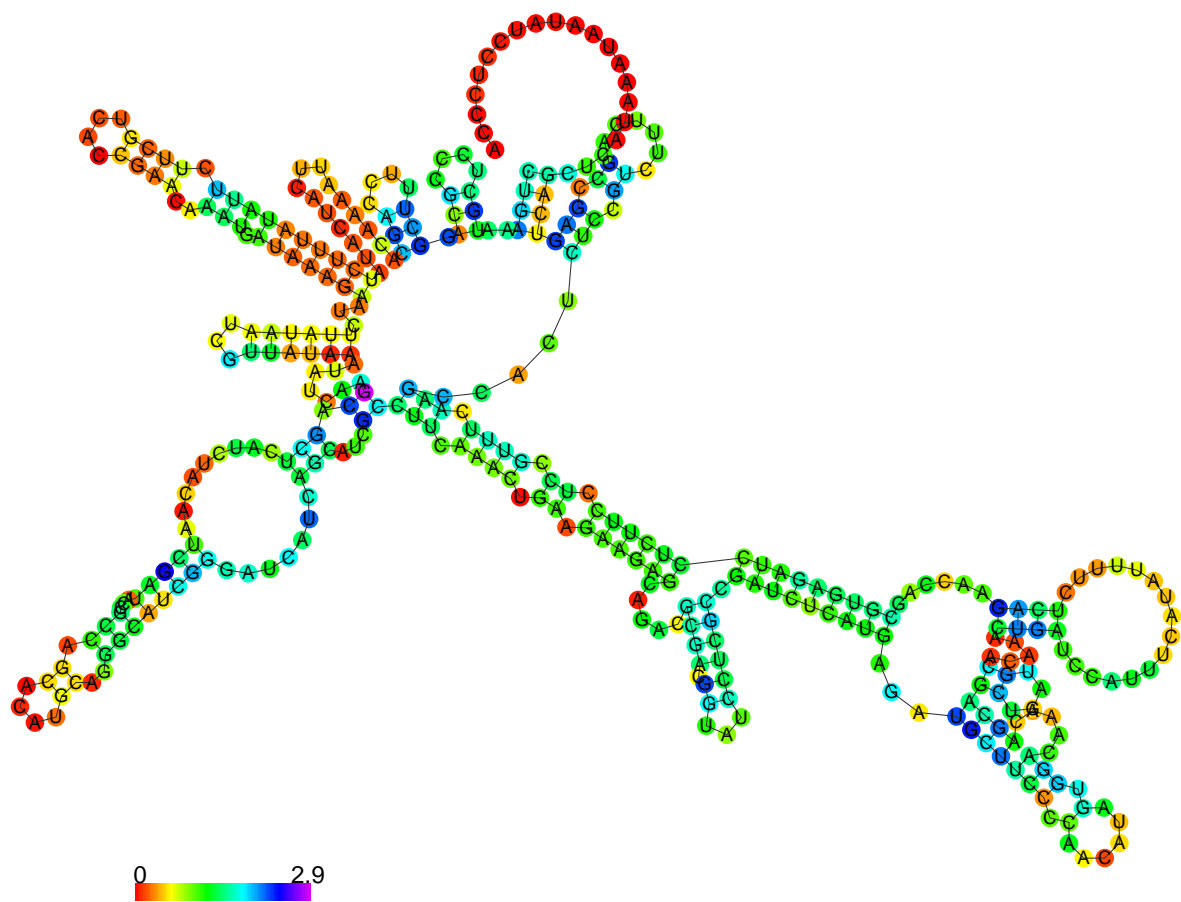

Supplement: Supplementary file 585 [file supplementary]

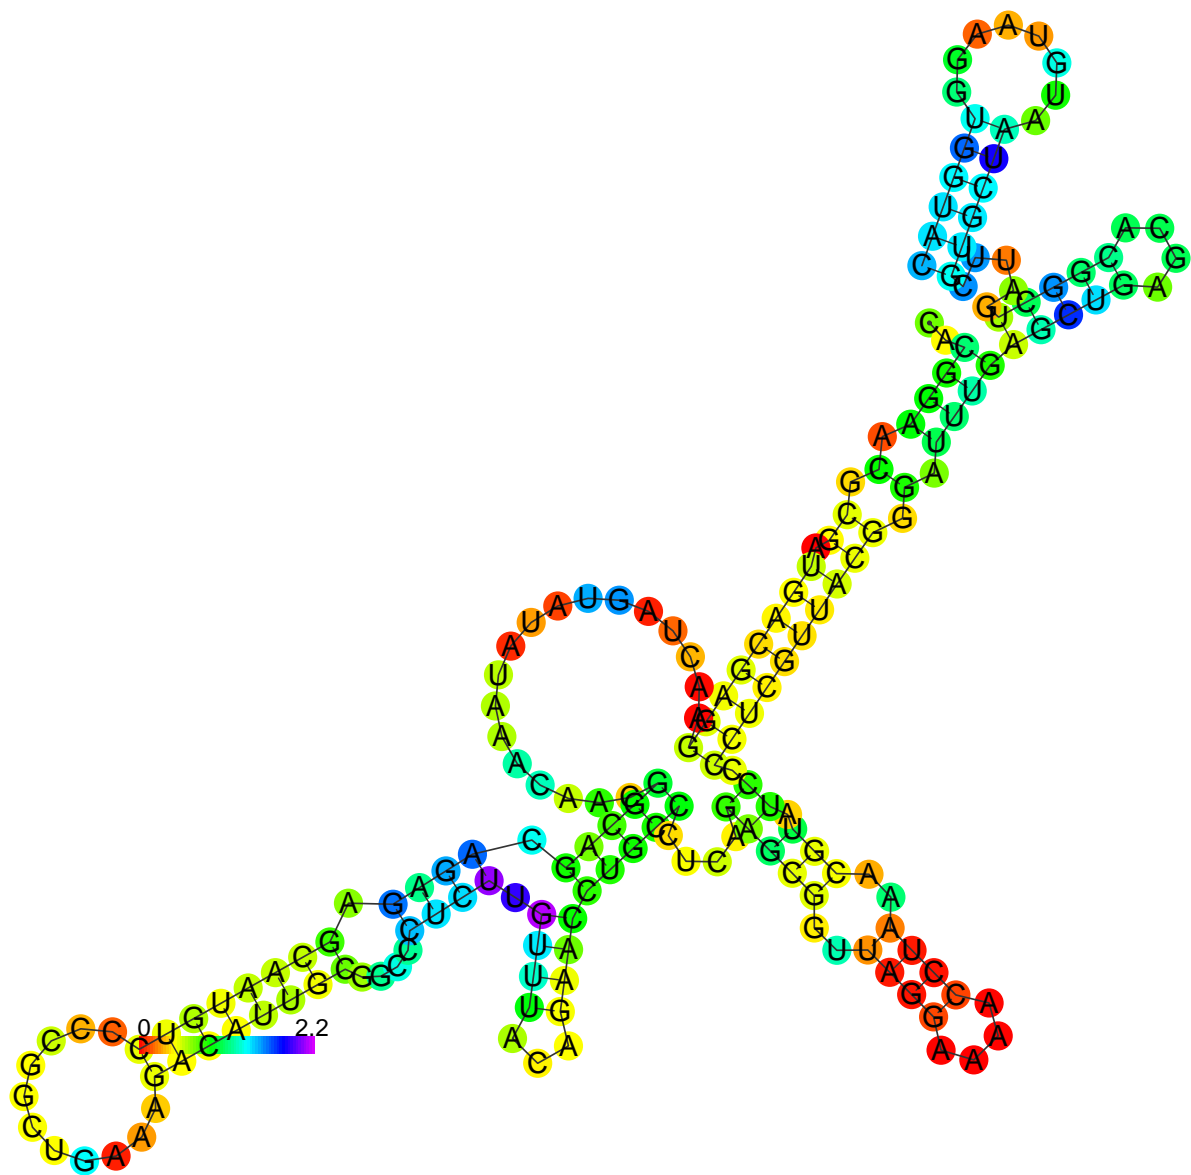

Supplement: Supplementary file 586 [file supplementary]

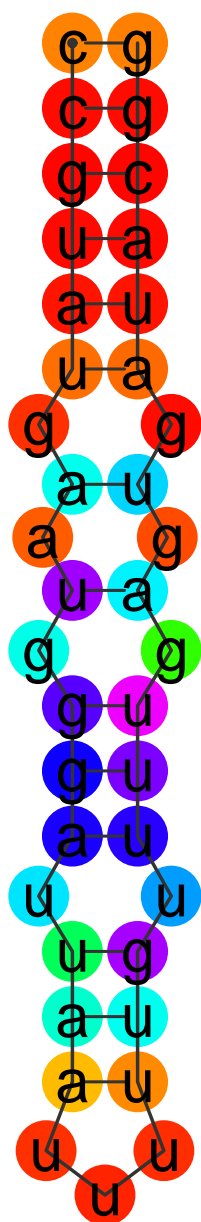

Supplement: Supplementary file 587 [file supplementary]

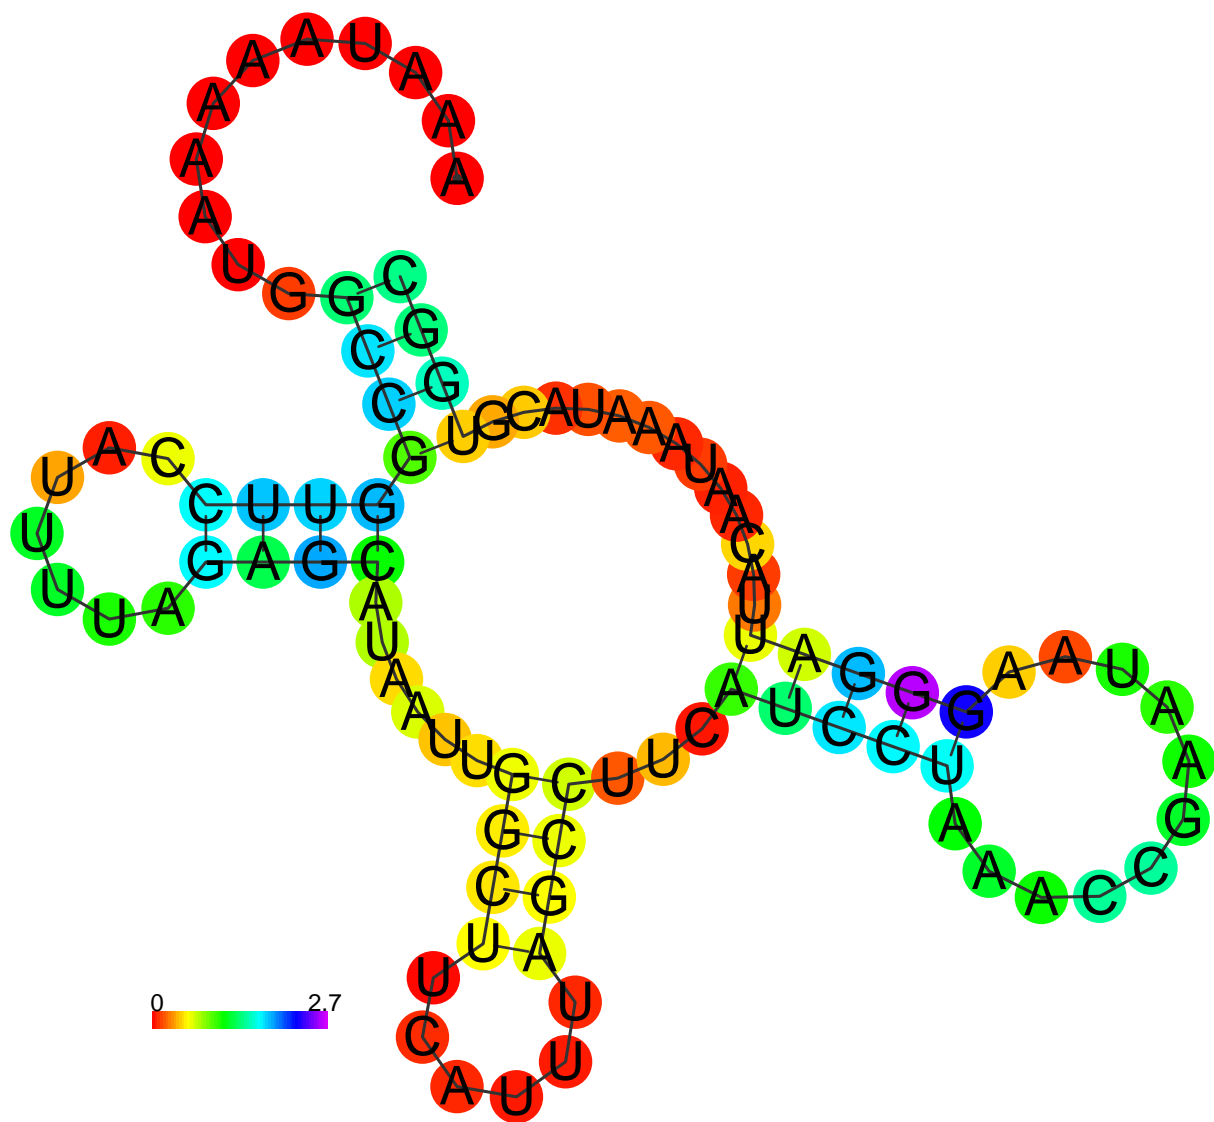

Supplement: Supplementary file 588 [file supplementary]

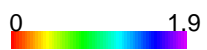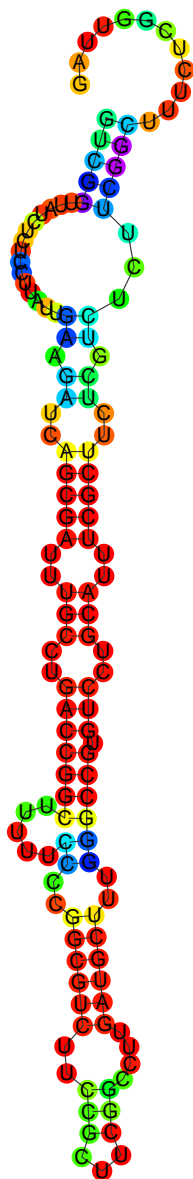

Supplement: Supplementary file 589 [file supplementary]

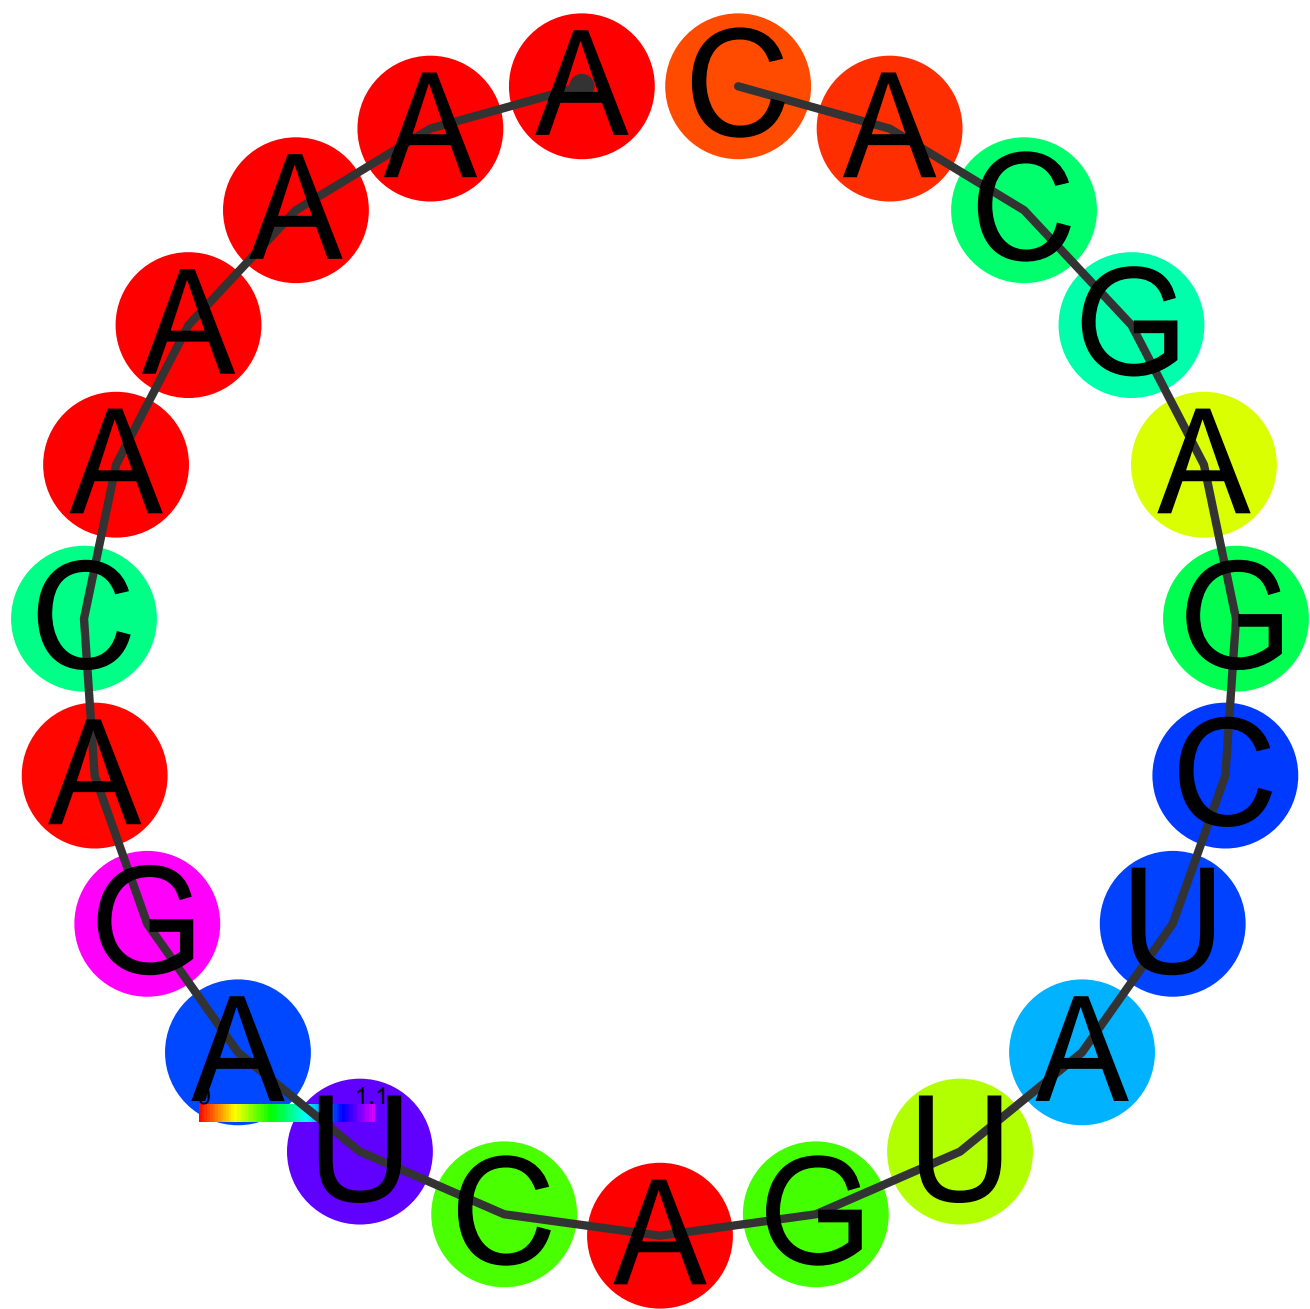

Supplement: Supplementary file 590 [file supplementary]

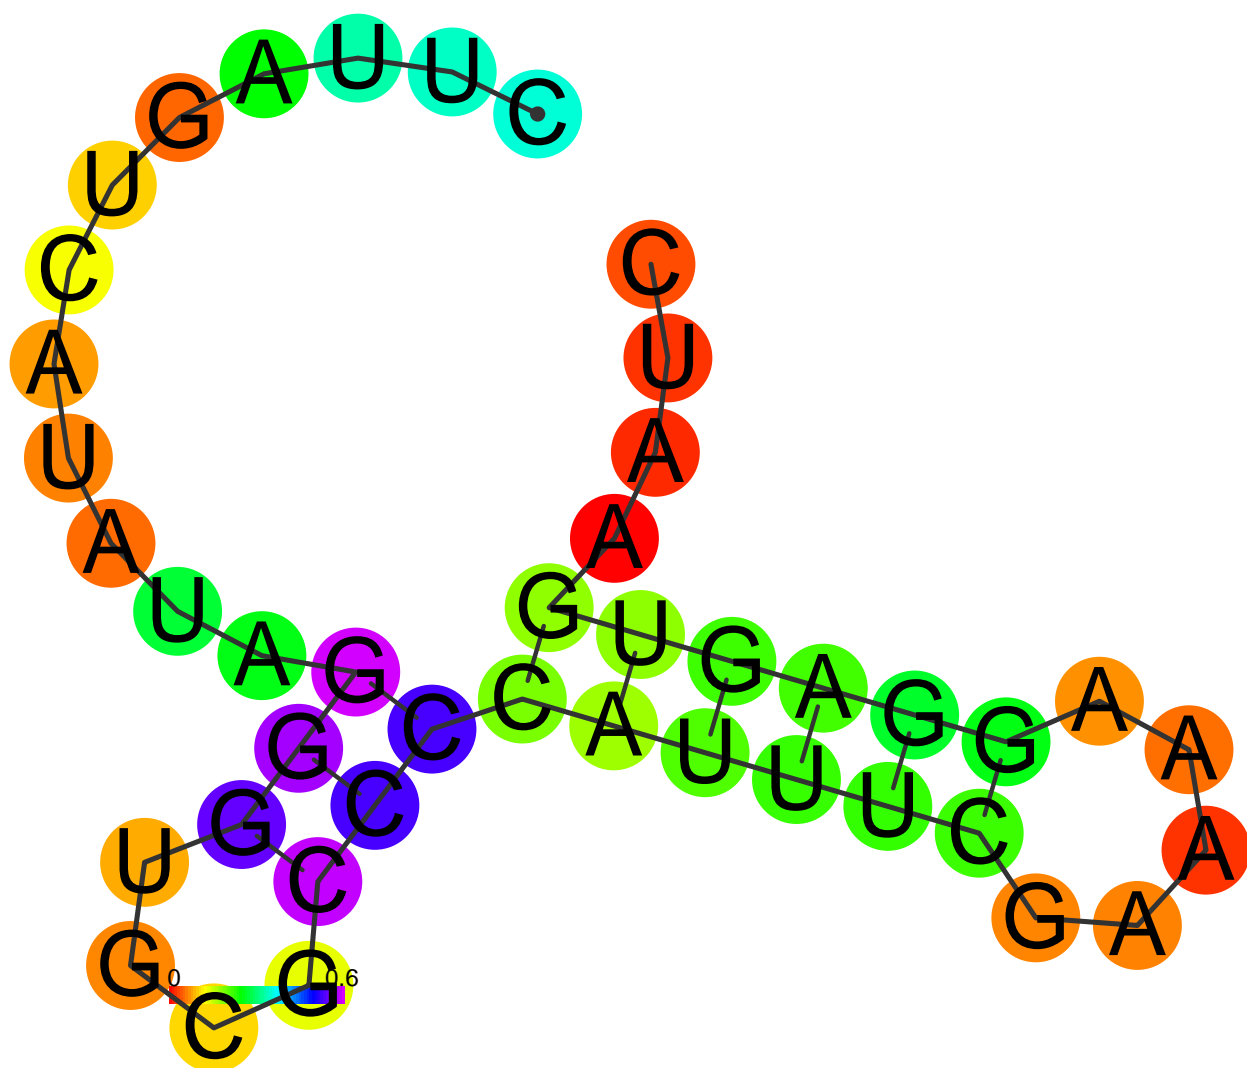

Supplement: Supplementary file 591 [file supplementary]

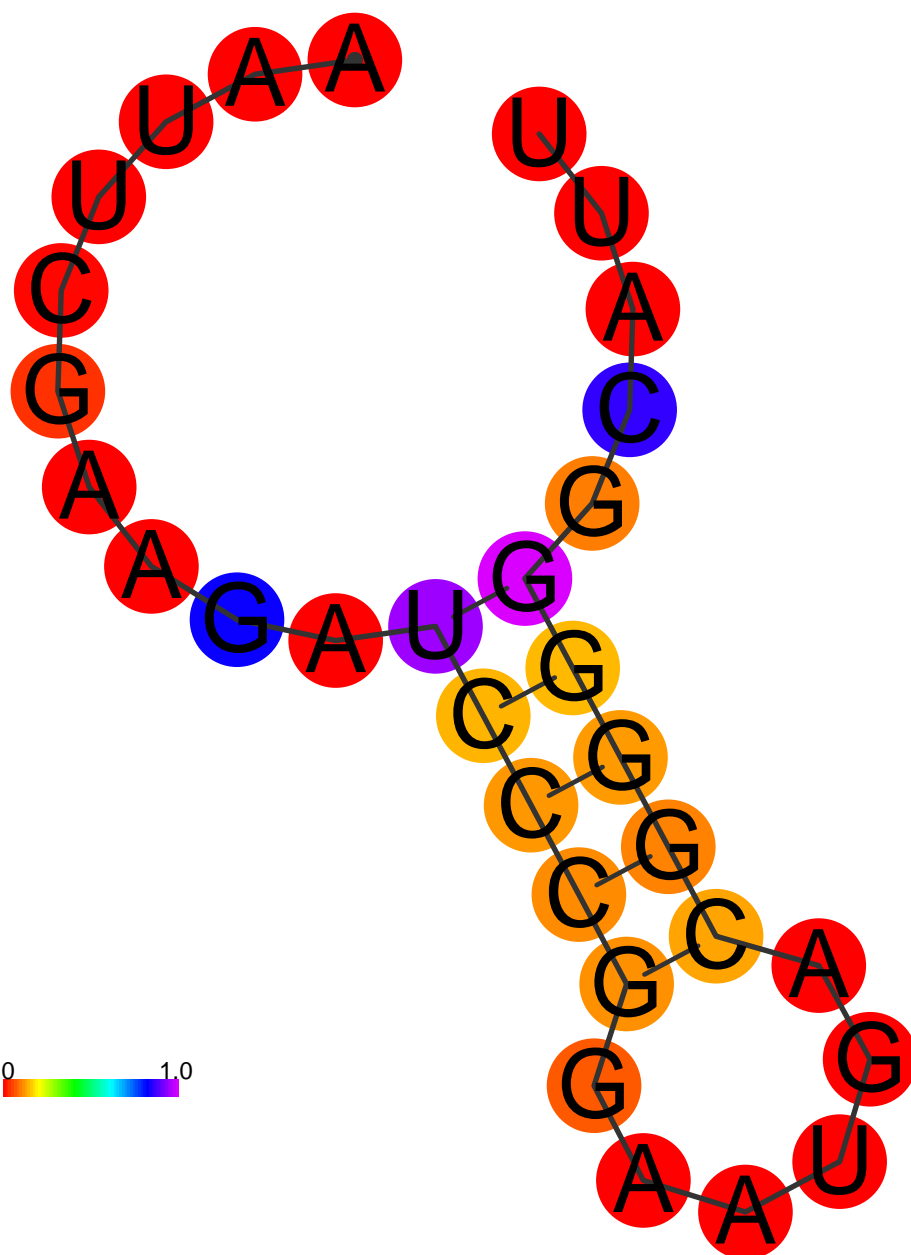

Supplement: Supplementary file 592 [file supplementary]

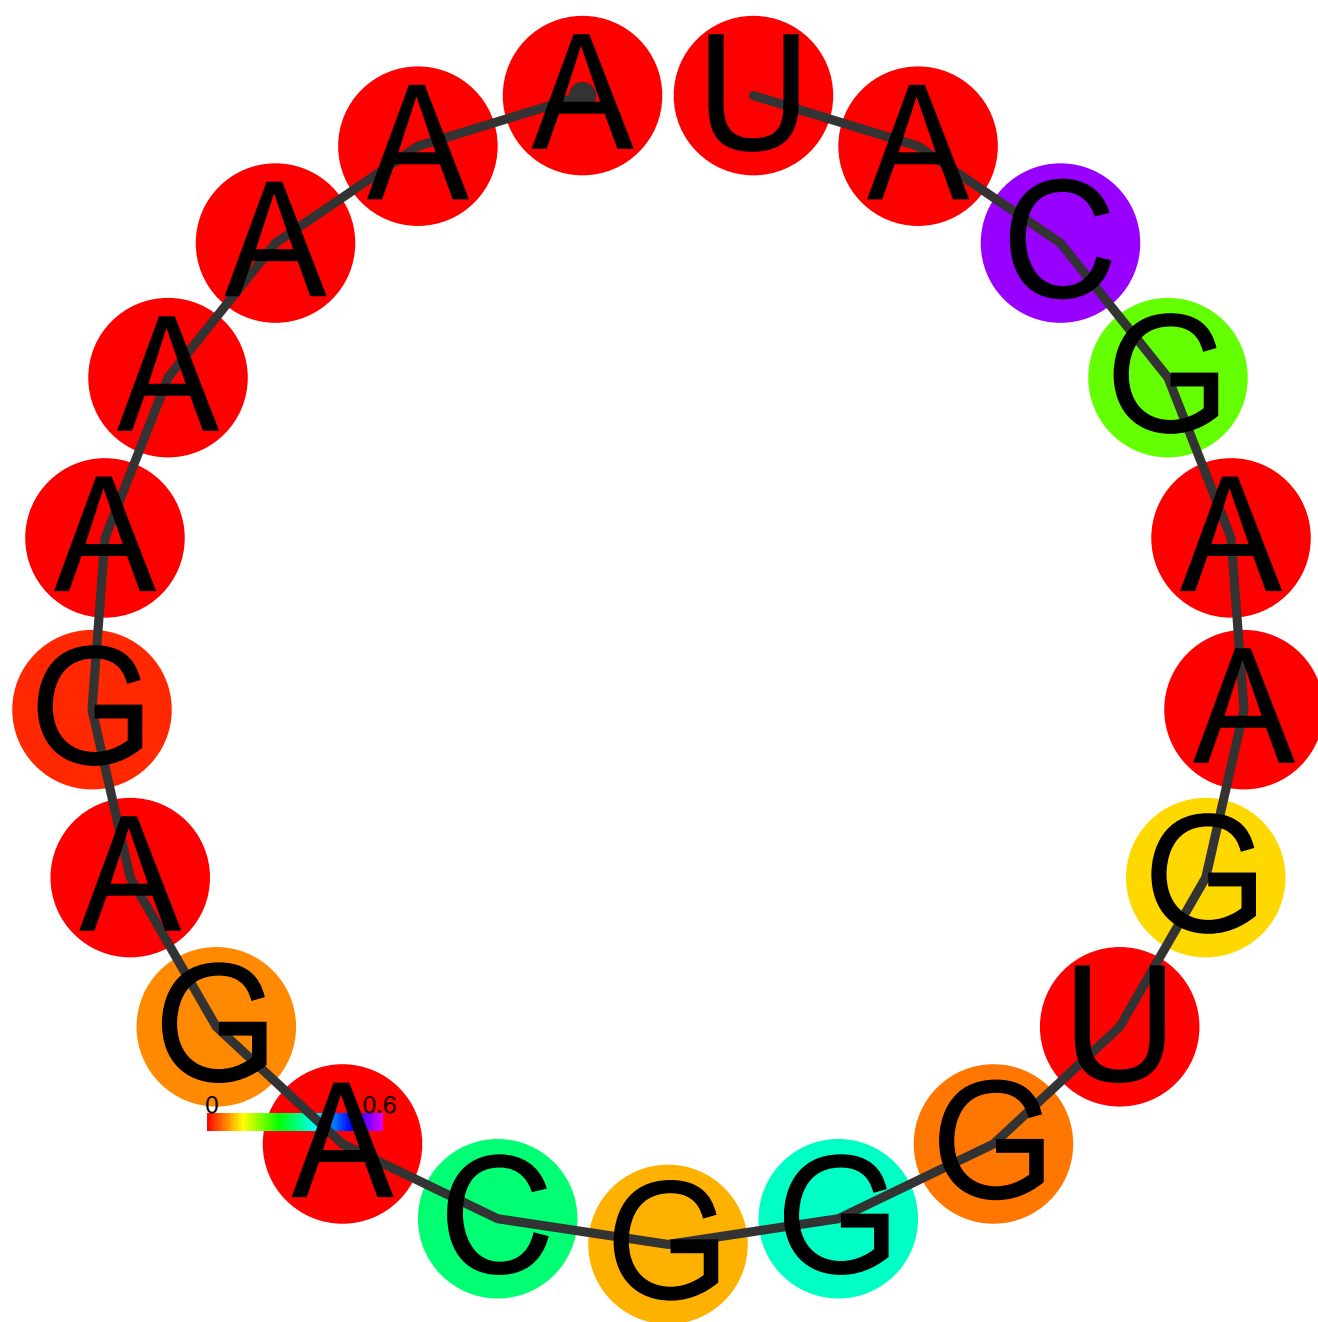

Supplement: Supplementary file 593 [file supplementary]

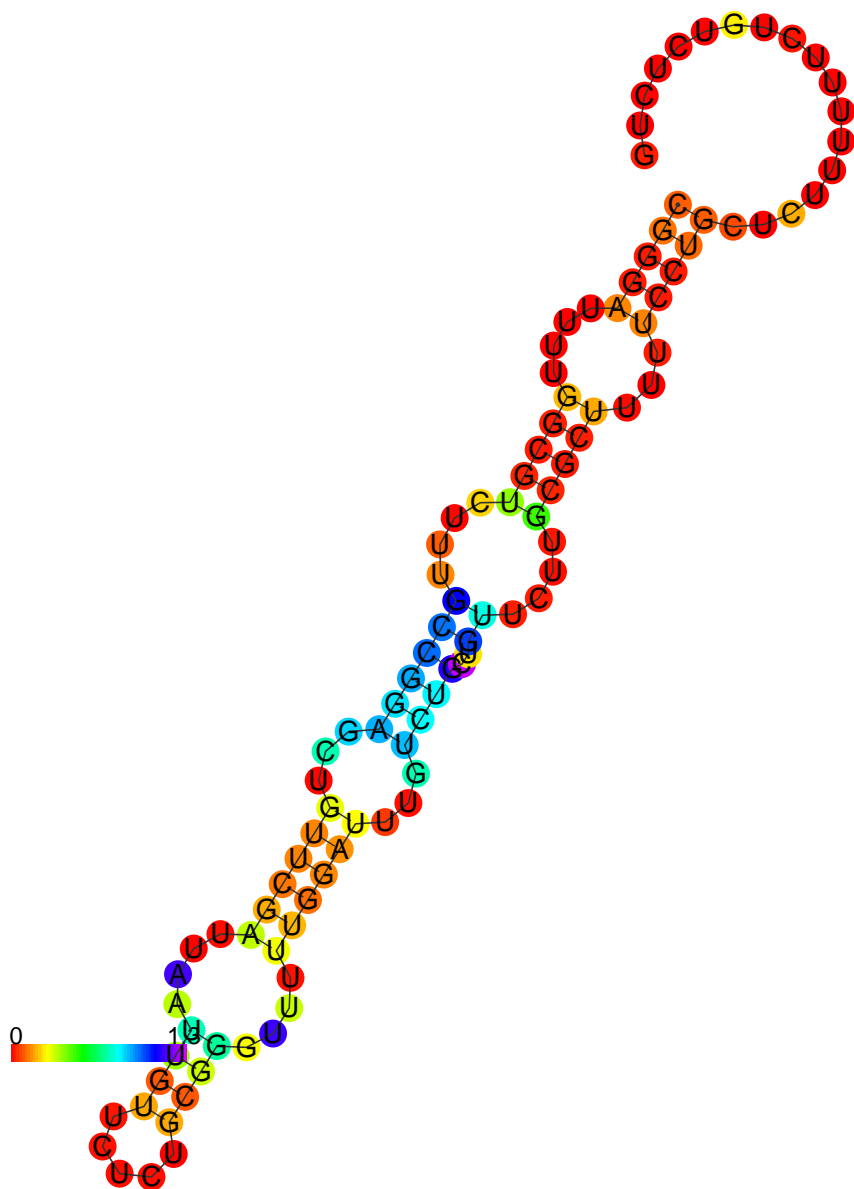

Supplement: Supplementary file 594 [file supplementary]

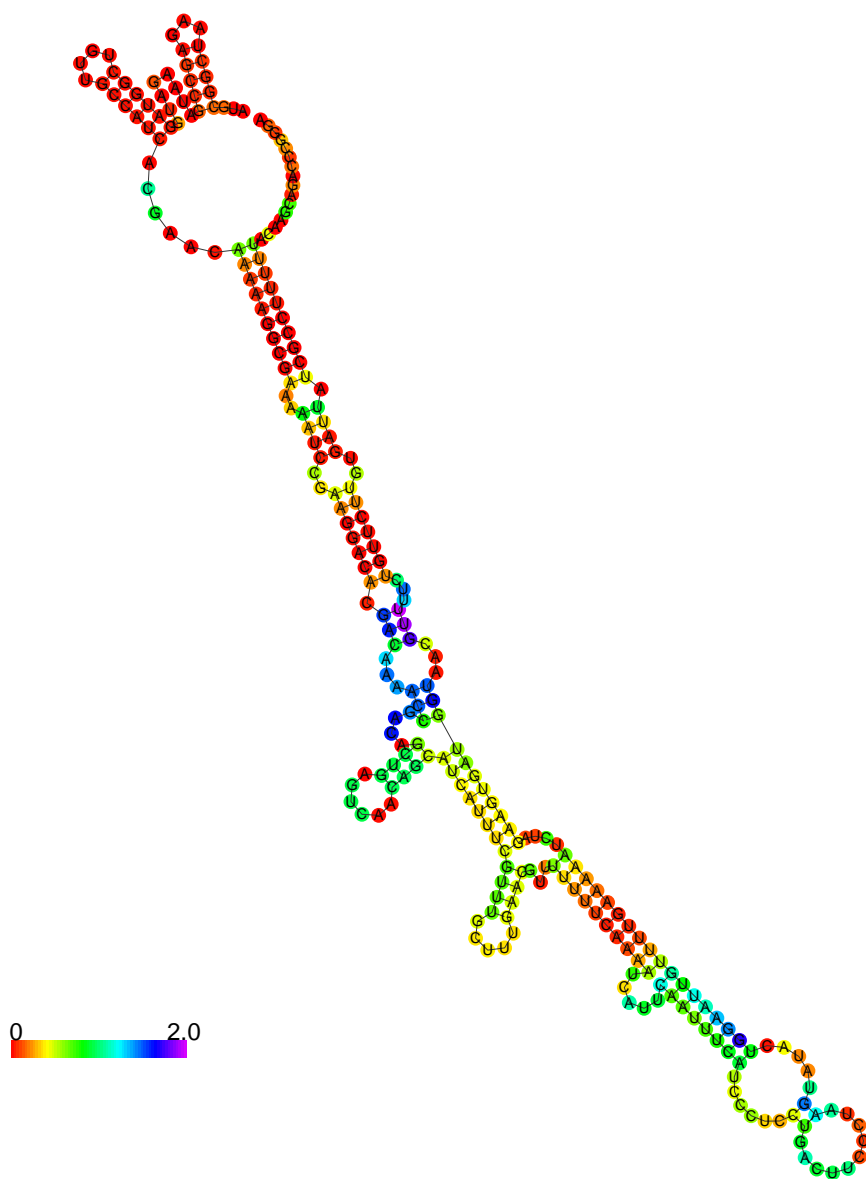

Supplement: Supplementary file 595 [file supplementary]

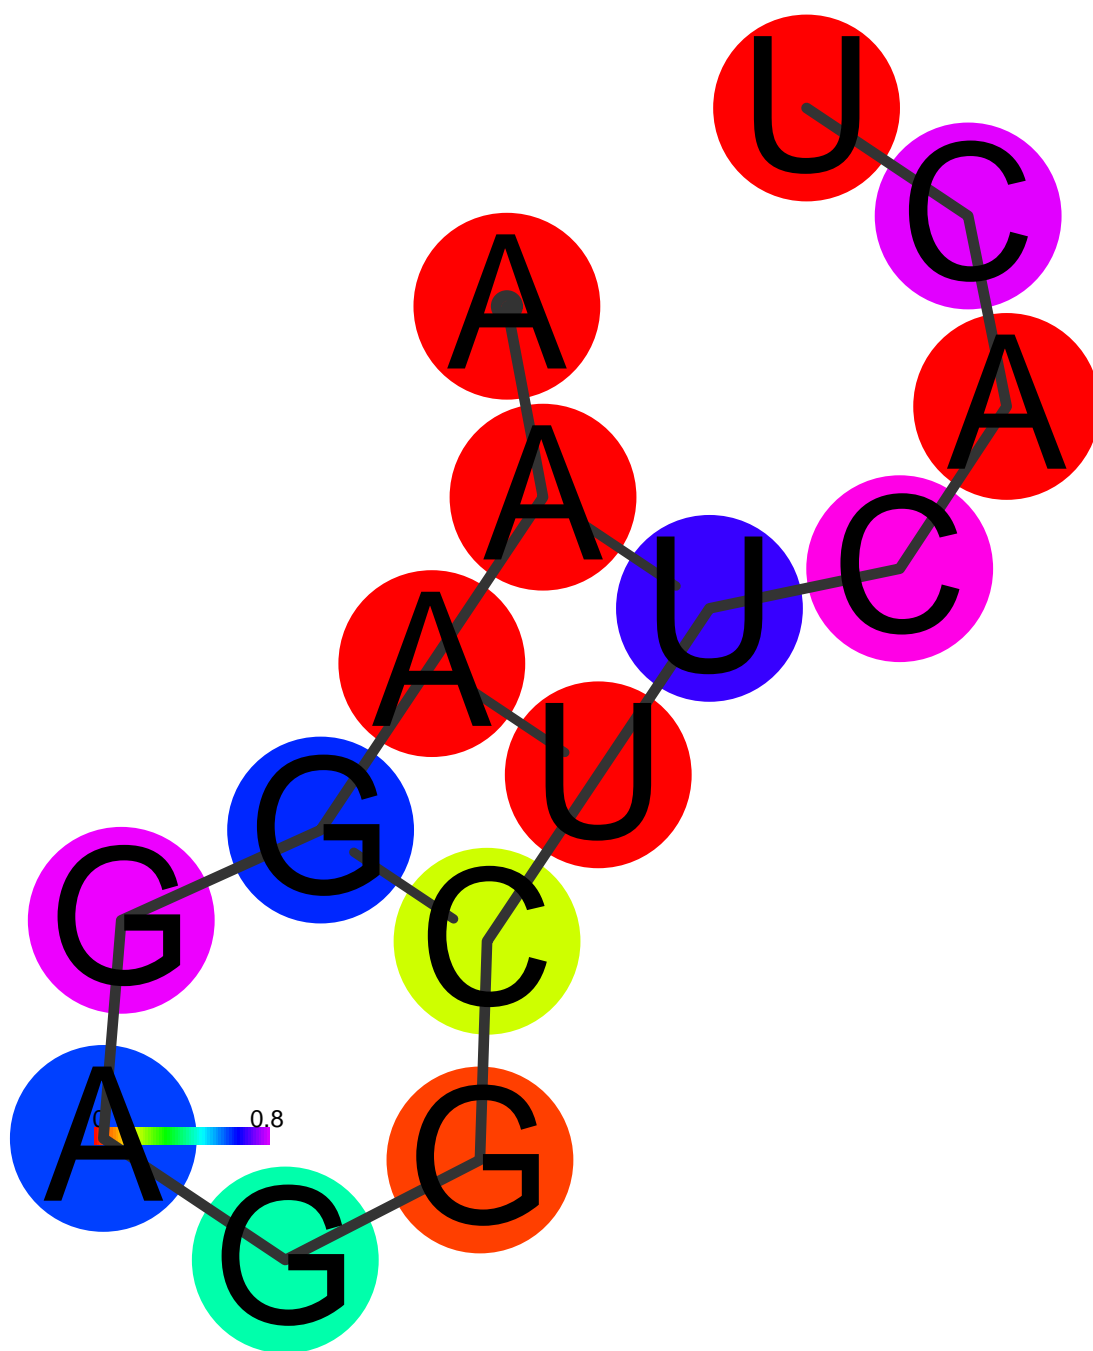

Supplement: Supplementary file 596 [file supplementary]

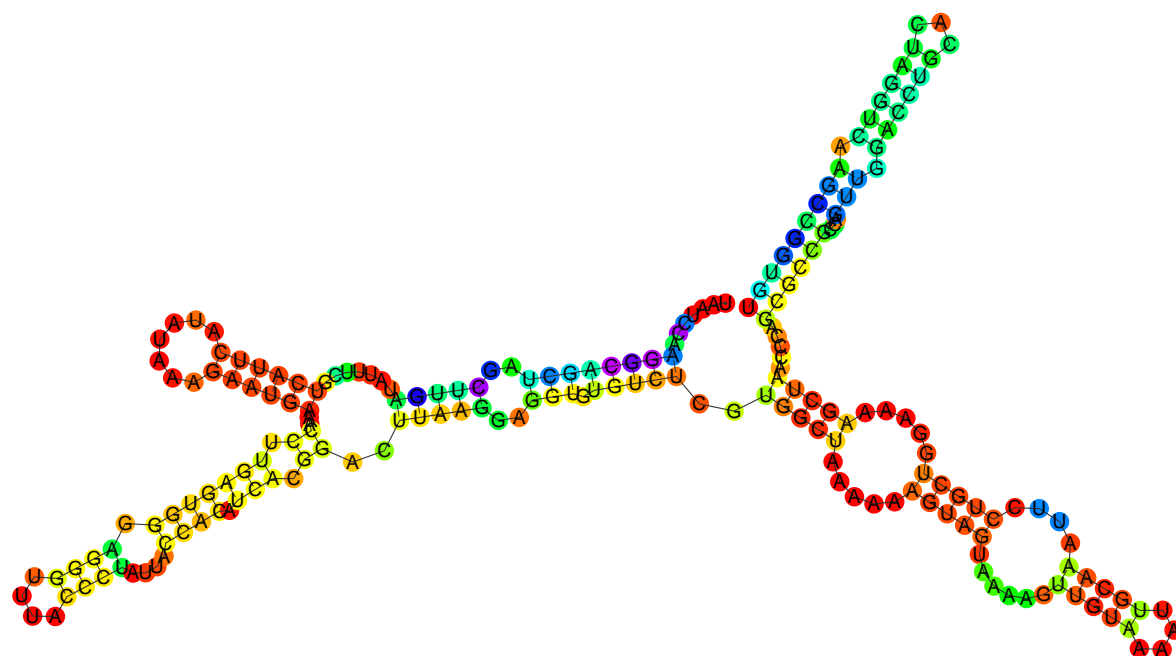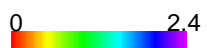

Supplement: Supplementary file 597 [file supplementary]
